# Supplementary material
Source: publisher figshare collection journal article supplement (https://sage.figshare.com/ndownloader/files/14729102)
Supplement: Supplementary file 3 [file 14729102]

Dependent Variable

Polity Score Change

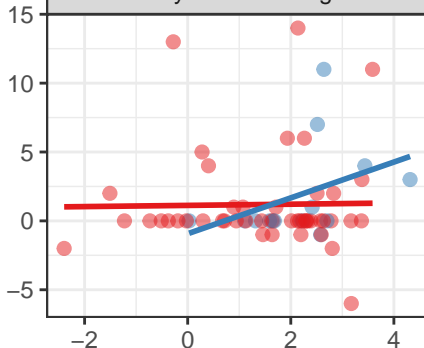

Election Quality

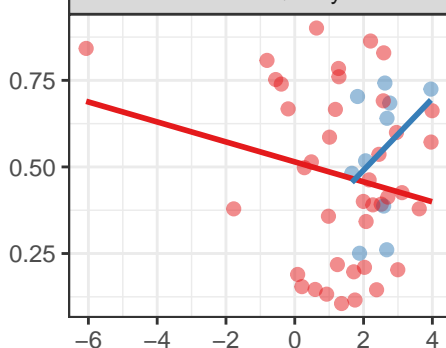

Judicial Independence

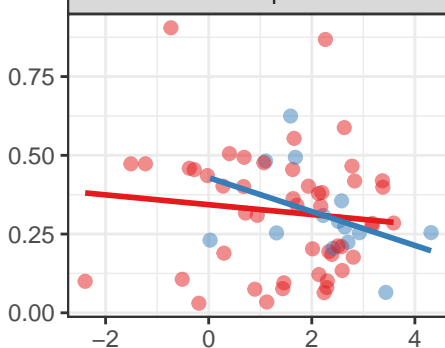

Public vs. Private Goods Spending

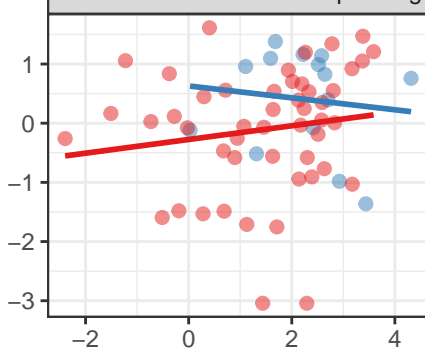

Aid/GDP (log)

—●— No Power-Sharing —●— Power-Sharing
