# Supplementary material
Source: publisher figshare collection journal article supplement (https://sage.figshare.com/ndownloader/files/14729102)
Supplement: Supplementary file 5 [file 14729102]

Archive with 44 entries (36 files):
- replication_archive/
- replication_archive/code/
- replication_archive/code/appendix_tables_and_plots.R
- replication_archive/code/functions/
- replication_archive/code/functions/laggedVar.R
- replication_archive/code/paper_tables_and_plots.R
- replication_archive/data/
- replication_archive/data/diss_df.rda
- replication_archive/data/external_input/
- replication_archive/data/external_input/aiddata_china_1_2.xlsx
- replication_archive/data/external_input/polity2_xpolity_plumper_corrected.rdata
- replication_archive/data/external_input/polity2_xpolity_plumper_corrected_combined.rdata
- replication_archive/data/external_input/PSED_dyad.xlsx
- replication_archive/data/external_input/uds_summary.csv
- replication_archive/data/instrumentedAid2.RData
- replication_archive/data/nelda_ps.rda
- replication_archive/data/output/
- replication_archive/data/output/iv_na_democ.dta
- replication_archive/data/output/iv_na_pubgoods.dta
- replication_archive/data/output/iv_na_rol.dta
- replication_archive/data/output/nelda_ivreg.dta
- replication_archive/plots/
- replication_archive/plots/appendix_figure_1.pdf
- replication_archive/plots/appendix_figure_2.pdf
- replication_archive/plots/appendix_figure_3.pdf
- replication_archive/plots/appendix_figure_4.pdf
- replication_archive/plots/appendix_figure_5.pdf
- replication_archive/plots/appendix_figure_6.pdf
- replication_archive/plots/figure_1.pdf
- replication_archive/plots/figure_2.pdf
- replication_archive/README.html
- replication_archive/README.Rmd
- replication_archive/tables/
- replication_archive/tables/appendix_table_10.html
- replication_archive/tables/appendix_table_11.html
- replication_archive/tables/appendix_table_3.html
- replication_archive/tables/appendix_table_4_after.html
- replication_archive/tables/appendix_table_4_before.html
- replication_archive/tables/appendix_table_5.html
- replication_archive/tables/appendix_table_6.html
- replication_archive/tables/appendix_table_8.html
- replication_archive/tables/appendix_table_9.html
- replication_archive/tables/table_1.html
- replication_archive/tables/table_1.tex
