# Supplementary material
Source: publisher figshare collection journal article supplement (https://sage.figshare.com/ndownloader/files/14729102)
Supplement: Supplementary file 5 [file 14729102 › replication_archive/data/external_input/aiddata_china_1_2.xlsx]

## Sheet: Cover Sheet
Data Parameters
Citation	Strange, Austin M., Axel Dreher, Andreas Fuchs, Bradley Parks, and Michael J. Tierney. 2017. Tracking Underreported Financial Flows: China’s Development Finance and the Aid–Conflict Nexus Revisited. Journal of Conflict Resolution 61 (5): 935-963
Dataset Name	AidData's Chinese Official Finance to Africa Dataset, 2000-2013, version 1.2
Content	Chinese Official Finance, including ODA-like, OOF-like, Vague Official Finance, and Official Investment. Only includes project records which are NOT cancelled, suspended, or sourced from suspicious reports.
Disclaimer	All projects greater than $100 million 2009 USD were re-examined by an AidData research assistant or project manager not involved in the record's creation. The top 100 officially financed projects also underwent a final thorough process of evaluation by two researchers. Flow_class and Intent variables were applied through a double-blind coding process. All details of participating organizations h…
	Variables	Description
	project_id	Unique identification number assigned to every project record created in the database.
	donor	Country providing the finance for the project.
	title	Short phrase describing the nature of the project.
	year	Year in which a formal commitment was made between a supplier of development finance and a recipient. For projects with no report of a formal commitment, the year in which an informal pledge was announced is used for the year variable.
	year_uncertain	Dummy variable for projects without any sources reporting a specific commitment year. In these cases, the year of the earliest media report serves as the “commitment year”.
	description	1-2 paragraph comprehensive summary of the activities supported by the project. See the methodology for a detailed explanation of how to record this variable.
	crs_sector_code	CRS Sector: Three-digit code for primary project sector. Codes are taken from the OECD’s CRS sector codes (“DAC 5” codes). See http://www.oecd.org/dac/aidstatistics/purposecodessectorclassification.htm. Sheet 4 in GREY contains all CRS sector codes used in the dataset
	crs_sector_name	Full descriptions of the 3-digit CRS sector code.
	sector_comment	Details regarding the specific sector nature of the project. For projects coded as “Multisector,” coders can list each of the known sectors in “Sector Comment.”
	status	The current stage of the project, as of the latest report found. Labels include: Cancelled, Completed, Pipeline:Commitment, Pipeline:Pledge, Suspended. See methodology for explanation of the status variable. Exclude pledges from all analysis of Chinese financing to a recipient.
	status_code	Coded interval for the "status" variable. 0 = Cancelled; 11 = Pipeline:Commitment; 12 = Pipeline:Pledge; 2 = Implementation; 3 = Completion; 4 = Suspended.
	flow	Describes the way finances, goods or services were transferred from the donor to recipient in the project. See the methodology for precise classifications. Flow types include: Debt Forgiveness, Debt Rescheduling, Export Credits, Foreign Direct Investment, Freestanding Technical Assistance, Montary Grant, In-Kind Grant, Grant (Vague), Loan Guarantee, Loan, Joint Venture with Recipient, Scholarship…
	all_recipients	Countries and/or regions receiving development assistance from donor entity. Followed with comma by sub-national location, if specified in reports. Each recipient entity is followed by the percentage of funds being disbursed to that entity.
	sources	String of text on source documentation, following this pattern: "[Document URL], [source document type], [platform used to access source document];"
	sources_count	The number of documents used to create the project record.
	funding_agency	List of all organizations involved in funding the project that could be identified. Includes each organization's type.
	implementing_agency	List of all organizations involved in project implementation that could be identified. Includes each organization's type.
	donor_agency	List of all organizations involved which are based in the donor entitity and could be identified.
	donor_agency_count	Number of donor organizations involved in the planning and implementation of the project that could be identified.
	recipient_agencies	List of all organizations involved which are based in the recipient entitity that could be identified.
	recipient_agencies_count	Number of recipient organizations involved in the planning and implementation of the project that could be identified.
	verified	Status of the project record within the database. "Checked" IDs have received both Stage One and Stage Two treatment. "Raw" IDs were created in Stage One searches, but have not been checked through Stage Two treatment. "Suspicious" IDs are sourced in dubious reports and require further investigation. Excluding project IDs marked "Suspicious" and "Raw" from data analysis is highly recommended.
	verified_code	Coalesced binary variable for the "verified" variable. 0 = Raw and Suspicious; 1 = Checked.
	flow_class	Classification of financial flow by degree of concessionality and level of state involvement . Categories include: ODA-like; OOF-like; Vague Official Finance; Joint Ventures with Chinese state involvement; Joint Ventures without Chinese state involvement; FDI with Chinese state involvement; FDI without Chinese state involvement; Vague (Residual Commercial Activities); Corporate Aid (With state in…
	flow_class_code	Coded "flow class" variable. 1 = Unset; 2 = ODA-like; 3 = OOF-like; 4 = Military; 5 = Vague (Official Finance); 6 = NGO Aid; 7 = CA+Gov; 8 = CA-Gov; 9 = FDI+Gov; 10 = FDI-Gov; 11 = JV +Gov; 13 = Vague (Commercial Activities); 14 = Official Investment.
	intent	Perceived intent of the finance provider. Categories covered by “donor intent” include: Development; Commercial; Representational; Mixed (some development); Mixed (no development)
	intent_code	Coded "intent" variable. 1 = Development, 2 = Commercial, 3 = Representational, 4 = Mixed, 5 = Mixed (No Development), 6 = Mixed (Some Development)
	active	Dichotomous variable to isolate duplicate or false projects. Each record is either "active" or "inactive". Note: project IDs are initially coded as “active” and remain such until labeled “inactive” by a researcher. Project IDs found to be duplicates of preexisting project IDs, as well as those that are not found to constitute a project, are labeled as “inactive.” Inactive projects are later revie…
	active_code	Dummy variable for "active" variable. 1=active; 2=not inactive.
	factiva_sources	URL(s) for all documentation found through Factiva during Stage One searches.
	amount	Monetary amount committed by the donor entity for the completion of a project, in the most original currency reported.
	currency	Currency associated with the monetary amount for a project as it was originally reported.
	deflators_used	Deflator used to convert project amount in original currency to 2009 U.S. Dollars value
	exchange_rates_used	Exchange rate used to convert project amount in original amount to 2009 U.S. Dollars value
	usd_defl	Deflated monetary equivalent of reported monetary amount in reported currency to 2009 U.S. Dollars.
	deflators_2011	Value needed to normalized from 2009 to 2011 dollars.
	usd_2011	Deflated monetary equivalent of reported monetary amount in reported currency to 2011 U.S. Dollars.
	start_actual	The actual date on which project implementation began.
	start_planned	The announced start date for a project.
	end_actual	The actual date on which a project was completed.
	end_planned	The announced completion date for a project.
	recipient_count	Number of countries or regions receiving funding through the project.
	recipient_condensed	Same as the "recipients" variable, but projects with multiple recipients receive "Africa, regional" here.
	recipient_cow_code	Recipient country, as coded by Correlates of War data. http://www.correlatesofwar.org/datasets.htm
	recipient_oecd_code	Name of recipient country as coded by the OECD. www.oecd.org/dataoecd/31/15/34107835.xls
	recipient_oecd_name	Truncated 3-letter name of recipient country from the OECD codebook. www.oecd.org/dataoecd/31/15/34107835.xls
	recipient_iso3	3-letter code for recipient country in ISO 3166-1 alpha-3 (published by the International Organization for Standardization). http://en.wikipedia.org/wiki/ISO_3166-1_alpha-3
	recipient_iso2	2-letter code for recipient country in ISO 3166-1 alpha-2 (published by the International Organization for Standardization) http://en.wikipedia.org/wiki/ISO_3166-1_alpha-2
	recipient_un_code	Three-digit code of recipient country as reported by the UN. http://unstats.un.org/unsd/methods/m49/m49.htm
	recipient_imf_code	Three-digit name of recipient country as reported by the IMF. http://www.imf.org/external/np/sta/cdis/pdf/060508g.pdf
	debt_uncertain	Dummy variable to indicate a debt reduction agreement in which the amount of debt reduced in the final deal cannot be ascertained.
	line_of_credit	Dummy variable to indicate the project involves a line of credit. Lines of credit may or may not be used by the recipient.
	is_cofinanced	Dummy variable to indicate the project has multiple donors (including China), where the financial amount provided by each donor separately could not distinguished.
	is_ground_truthing	Dummy variable to indicate the projects that have been visited by professional enumerators to confirm project data
	loan_type	Categorical variable to represent the general nature of the loan. Categories covered include: interest-free; concessional; non-concessional; no information.
	interest_rate	Reported interest rate of the project loan, in percent
	maturity	Reported duration of the project loan, in years
	grace_period	Reported grace peiod of the loan, in years
	grant_element	Grant element of the loan, in percent. Uses reported grant element of the loan, unless could be calculated using OECD grant element calculator (assumes 10 percent rate of discount, 2 payments per annum, and equity principal payment).
	is_official_finance	Coded variable denoting Official Finance designation: 1 = is official finance, 0 = not official finance.
	source_triangulation	This variable rates a project based on the number and diversity of resources informing a database entry. A project will receive 1 point for every media report informing it (capped at 4 points) and points as follows when other information sources are cited. Official Government Sources (Donor/Recipient): 3 Other Official Sources (non-Donor/non-Recipient): 3 Implementing Agency Source: 2 Academic Jo…
	field_completeness	This variable rates a project based on the completeness of a project record. A project is penalized points when important fields are vague or missing. See Appendix M of the 1.2 Methodology for full details on the scoring criteria.

## Sheet: Official Finance
project_id	donor	title	year	year_uncertain	description	crs_sector_code	crs_sector_name	sector_comment	status	status_code	flow	all_recipients	sources	sources_count	funding_agency	implementing_agency	donor_agency	donor_agency_count	recipient_agencies	recipient_agencies_count	verified	verified_code	flow_class	flow_class_code	intent	intent_code	active	active_code	factiva_sources	amount	currency	deflators_used	exchange_rates_used	usd_defl	deflators_2011	usd_2011	usd_current	start_actual	start_planned	end_actual	end_planned	recipient_count	recipient_condensed	recipient_cow_code	recipient_oecd_code	recipient_oecd_name	recipient_iso3	recipient_iso2	recipient_un_code
30888	China	China funds cross-border water project in Djibouti, Ethiopia	2013	FALSE	A signing ceremony of a loan agreement between the Republic of Djibouti and the Exim Bank of China was held in September 2013. According to the agreement, China is funding 332 million USD for a cross-border water project between Ethiopia and Djibouti. The launch of work on drinking water in the Ethiopian region of Shinille to Djibouti through the construction of a pipeline and the drilling of wel…	140	Water Supply and Sanitation	Pipelines and wells for drinking water	Pipeline: Commitment	11	Loan (excluding debt rescheduling)	Africa, regional	http://global.factiva.com/aa/?ref=BBCAP00020130913e99d002xl&pp=1&fcpil=en&napc=S&sa_from=, Media Report, including Wikileaks; https://global.factiva.com/aa/?ref=IOLET00020140417ea4400007&pp=1&fcpil=en&napc=S&sa_from=, Media Report, including Wikileaks; http://tradeatonce.com/blog/djibouti-water-trade-between-djibouti-and-ethiopia/, Media Report, including Wikileaks	3	Export-Import Bank of China, Government Agency		Export-Import Bank of China, Government Agency	1			Checked	1	ODA-like	2	Mixed (Some Development)	6	Active	1	http://global.factiva.com/aa/?ref=BBCAP00020130913e99d002xl&pp=1&fcpil=en&napc=S&sa_from=, Media Report, including Wikileaks; https://global.factiva.com/aa/?ref=IOLET00020140417ea4400007&pp=1&fcpil=en&napc=S&sa_from=, Media Report, including Wikileaks	332000000	USD	1.09	1	304587156	1.13667	3.46216e+08						1	Africa, regional		298	Africa, regional	Africa, regional	XR
30889	China	China grants assistance to IGAD for peacekeeping in East Africa	2013	FALSE	In 2013, China granted 100 million USD to the Inter-Governmental Authority on Development (IGAD) to safeguard peace in the region. A convention was signed on 29 November by Chinese ambassador to Djibouti, Mr Fu Huagiang, and the executive secretary of IGAD, Mr Mahyoub Maalin.	150	Government and Civil Society	Peacekeeping in East Africa	Pipeline: Commitment	11	Grant	Africa, regional	http://global.factiva.com/aa/?ref=BBCAP00020131203e9c3001xj&pp=1&fcpil=en&napc=S&sa_from=, Media Report, including Wikileaks; https://www.google.com/url?sa=t&rct=j&q=&esrc=s&source=web&cd=6&cad=rja&uact=8&ved=0CFsQFjAF&url=http%3A%2F%2Fwww.saiia.org.za%2Fdoc_download%2F499-seeking-security-in-africa-china-s-evolving-approach-to-the-african-peace-and-security-architecture&ei=ZqNFU8qJHZGa0gHJ8oDwDw…	3		Intergovernmental Authority on Development (IGAD)					Checked	1	ODA-like	2	Development	1	Active	1	http://global.factiva.com/aa/?ref=BBCAP00020131203e9c3001xj&pp=1&fcpil=en&napc=S&sa_from=, Media Report, including Wikileaks	100000000	USD	1.09	1	9.17431e+07	1.13667	1.04282e+08		2013-12-03				1	Africa, regional		298	Africa, regional	Africa, regional	XR
30171	China	Additional Loan for Addis Ababa-Djibouti Railway Project	2013	FALSE	In 2013 Djibouti, Ethiopia, and China signed a loan agreement of nearly 3 billion USD for the construction of the 756km Addis Ababa-Djibouti Railway Project. The loan was from China Exim Bank and will cover the cost of the remaining 100km that extends from the Ethiopian border with Djibouti to Port of Dorrale.	210	Transport and Storage		Pipeline: Commitment	11	Loan (excluding debt rescheduling)	Africa, regional	http://global.factiva.com/aa/?ref=AFNWS00020130523e95n00191&pp=1&fcpil=en&napc=S&sa_from=, Media Report, including Wikileaks; http://www.mfa.gov.et/news/more.php?newsid=1942, Government Source (Donor/Recipient); http://www.mfa.gov.et/news/more.php?newsid=35, Government Source (Donor/Recipient)	3	Export-Import Bank of China, Government Agency		Export-Import Bank of China, Government Agency	1			Checked	1	Vague (Official Finance)	5	Development	1	Active	1	http://global.factiva.com/aa/?ref=AFNWS00020130523e95n00191&pp=1&fcpil=en&napc=S&sa_from=, Media Report, including Wikileaks	3000000	USD	1.09	1	2.75229e+06	1.13667	3.12846e+06						1	Africa, regional		298	Africa, regional	Africa, regional	XR
31117	China	Performance by Students from Universities in Shanghai	2013	FALSE	On July 14, 2013, students and performers from 4 different universities in Shanghai visited Maseru, Lesotho for a cultural-exchange art performance. The show celebrated King Letsie III of Lesotho's 50th birthday. The arts troupe gave a performance reflecting the goodwill and friendship between China and Lesotho. On July 17, the group visited University of Pretoria in South Africa. They also put o…	110	Education	Performance	Completion	3	Grant	Africa, regional	http://global.factiva.com/aa/?ref=PARALL0020130930e99u0000o&pp=1&fcpil=en&napc=S&sa_from=, Media Report, including Wikileaks; http://china.huanqiu.com/News/fmprc/2013-07/4154209.html, Media Report, including Wikileaks; http://www.motlejoa.co.ls/mtec1/wp-content/uploads/2013/12/Shanghai-University-Troupe-Speech.pdf, Other; http://www.shedunews.com/zhuanti/xinwenzhuanti/085/085_xwzx/085_xwzx_shtyxy…	4		Shanghai University Students Arts Troupe, Multilateral	Shanghai University Students Arts Troupe, Multilateral	1			Checked	1	OOF-like	3	Representational	3	Active	1	http://global.factiva.com/aa/?ref=PARALL0020130930e99u0000o&pp=1&fcpil=en&napc=S&sa_from=, Media Report, including Wikileaks						1.13667	0						1	Africa, regional		298	Africa, regional	Africa, regional	XR
30288	China	China extends 42.6 million USD interest free loan to Tanzania-Zambia Railway Authority	2012	FALSE	In March 2012, China offered to help pay for the rehabilitation of the Tanzania-Zambia Railway Authority (TAZARA) rail lines. China provided a $42.6 million (K223 billion) interest-free loan to revive the operations. The agreement also provided a grant of $23.5 million (K123 billion) for the rehabilitation of the railway line and infrastructure (ID #30287). The agreements were to be officially si…	210	Transport and Storage	Railway rehabilitation	Implementation	2	Loan (excluding debt rescheduling)	Africa, regional	http://allafrica.com/stories/201203160034.html, Media Report, including Wikileaks; http://global.factiva.com/aa/?ref=AFNWS00020120918e89i000uk&pp=1&fcpil=en&napc=S&sa_from=, Media Report, including Wikileaks; http://global.factiva.com/aa/?ref=AFNWS00020120408e84700034&pp=1&fcpil=en&napc=S&sa_from=, Media Report, including Wikileaks; http://www.africanreview.com/transport-a-logistics/rail/china-si…	5					Tanzania-Zambia Railway Authority (TAZARA), State-Owned Company	1	Checked	1	ODA-like	2	Development	1	Active	1	http://global.factiva.com/aa/?ref=AFNWS00020120918e89i000uk&pp=1&fcpil=en&napc=S&sa_from=, Media Report, including Wikileaks; http://global.factiva.com/aa/?ref=AFNWS00020120408e84700034&pp=1&fcpil=en&napc=S&sa_from=, Media Report, including Wikileaks	42600000	USD	1.1898	1	3.58045e+07	1.13667	4.0698e+07	42600000					1	Africa, regional		298	Africa, regional	Africa, regional	XR
30287	China	China offers 23.5 million USD grant to Tanzania-Zambia Railway Authority	2012	FALSE	In March 2012, China offered to help pay for the rehabilitation of the Tanzania-Zambia Railway Authority (TAZARA) rail lines. The agreement provided a grant of $23.5 million (K123 billion) for the rehabilitation of the railway line and infrastructure. China also provided a $42.6 million (K223 billion) interest-free loan to revive the operations (ID #30288). The agreements were to be officially si…	210	Transport and Storage	Railway rehabilitation	Completion	3	Grant	Africa, regional	http://allafrica.com/stories/201203160034.html, Media Report, including Wikileaks; http://www.africanreview.com/transport-a-logistics/rail/china-signs-us-42-million-tazara-rehabilitation-deal, Media Report, including Wikileaks; http://www.chinafrica.cn/english/africa_report/txt/2012-11/29/content_504210.htm, Media Report, including Wikileaks	3		Tanzania-Zambia Railway Authority (TAZARA), State-Owned Company			Tanzania-Zambia Railway Authority (TAZARA), State-Owned Company	1	Checked	1	ODA-like	2	Development	1	Active	1		23500000	USD	1.1898	1	1.97513e+07	1.13667	2.24508e+07	23500000					1	Africa, regional		298	Africa, regional	Africa, regional	XR
31273	China	Special Loan for African SMEs	2012	FALSE	In April 2012 it was announced at the Fourth Ministerial Conference of the Forum on China-Africa Cooperation that China would provide loans of 1 billion USD for Small and Medium Enterprises. This loan would be through the China Development Bank. By the end of Jan. 2012, CDB had signed special loan contracts of US$ 633million, cumulatively extended US$278 million, and committed US$ 774million to v…	430	Other Multisector		Implementation	2	Loan (excluding debt rescheduling)	Africa, regional	http://www.american.edu/sis/faculty/upload/Brautigam-Chinese-Aid-in-Africa.pdf, Other Official Source (non-Donor, non-Recipient); http://english.mofcom.gov.cn/article/policyrelease/Cocoon/201106/20110607621336.shtml, Government Source (Donor/Recipient); http://www.cdb.com.cn/english/NewsInfo.asp?NewsId=4340, Government Source (Donor/Recipient)	3	China Development Bank (CDB), Government Agency		China Development Bank (CDB), Government Agency	1			Checked	1	OOF-like	3	Mixed (Some Development)	6	Active	1		1000000000	USD	1.1898	1	8.4048e+08	1.13667	9.55352e+08	1000000000					1	Africa, regional		298	Africa, regional	Africa, regional	XR
30066	China	China Finances a 100 km highway	2012	TRUE	In 2013, China, Ethiopia, and Sudan announced the opening of a new 27 million USD 100 km highway financed by China between the two East African countries. The highway connects the Ethiopian town of Asossa with the Sudanese town of Kumruk. The construction was implemented by an unnamed Chinese construction company.	210	Transport and Storage		Completion	3	Vague TBD	Africa, regional	http://www.ccs.org.za/wp-content/uploads/2013/01/CCS_Weekly_China_Briefing_25_Jan_Dewi.pdf, Other Academic (Working Paper, Dissertation); http://www.mfa.gov.et/news/more.php?newsid=346, Government Source (Donor/Recipient); http://www.sudantribune.com/spip.php?article45195, Media Report, including Wikileaks; http://www.eturbonews.com/33119/chinese-build-highway-link-between-sudan-and-ethiopia, Med…	5							Checked	1	Vague (Official Finance)	5	Development	1	Active	1		27000000	USD	1.1898	1	2.2693e+07	1.13667	2.57945e+07	27000000					1	Africa, regional		298	Africa, regional	Africa, regional	XR
1471	China	Rail Line From Addis Ababa to Djibouti	2011	FALSE	On March 30, 2011, it was reported that both India and China will help Ethiopia construct the Addis Ababa light rail line. India pledged 300 million USD for the construction, and the China ExIm Bank signed a loan agreement with Ethiopia on June 22, 2011. In an Ethiopian 2012 budget report, there was a loan signed between the government and China EXIM Bank for a railway project(s) whose signing da…	210	Transport and Storage		Implementation	2	Loan (excluding debt rescheduling)	Africa, regional	http://www.railjournal.com/index.php/freight/ccecc-to-build-ethiopias-meeso-dewale-line.html#.UAhMezHLx-Q, Media Report, including Wikileaks; http://global.factiva.com/aa/?ref=LBA0000020111217e7ch000id&pp=1&fcpil=en&napc=S&sa_from=, Media Report, including Wikileaks; http://search.proquest.com.gate2.library.lse.ac.uk/docview/1347302042/13E9A5240841CB86C97/5?accountid=9630, Other; http://www.youtu…	31	Industrial and Commercial Bank of China (ICBC), State-Owned Company; Export-Import Bank of China, Government Agency; China Development Bank (CDB), Government Agency; Industrial and Commercial Bank of China Ltd. (ICBC), State-Owned Company; China Development Bank (CDB), Government Agency	China Civil Engineering Construction Corporation (CCECC), State-Owned Company	Industrial and Commercial Bank of China (ICBC), State-Owned Company; Export-Import Bank of China, Government Agency; China Development Bank (CDB), Government Agency; Industrial and Commercial Bank of China Ltd. (ICBC), State-Owned Company; China Development Bank (CDB), Government Agency; China Civil Engineering Construction Corporation (CCECC), State-Owned Company	6			Checked	1	ODA-like	2	Development	1	Active	1	http://global.factiva.com/aa/?ref=LBA0000020111217e7ch000id&pp=1&fcpil=en&napc=S&sa_from=, Media Report, including Wikileaks; http://global.factiva.com/aa/?ref=AFNWS00020130523e95n00191&pp=1&fcpil=en&napc=S&sa_from=, Media Report, including Wikileaks; http://global.factiva.com/aa/?ref=BBCAP00020130430e94u000mb&pp=1&fcpil=en&napc=S&sa_from=, Media Report, including Wikileaks; http://global.factiva…	475000000	USD	1.20634	1	3.93751e+08	1.13667	4.47567e+08	475000000					1	Africa, regional		298	Africa, regional	Africa, regional	XR
30197	China	Cotton Agreement	2011	FALSE	In December 2011, China signed a cotton agreement with four key cotton-producing African countries, Burkina Faso, Mali, Chad and Benin (known as the C4), providing China with an alternative source of cotton. China stated it would provide seeds, machinery, fertilizer and other materials in a bid to increase and improve the quality of local production. Chinese commerce minister Chen Deming attended…	310	Agriculture, Forestry and Fishing	Cotton	Implementation	2	Grant	Africa, regional	http://global.factiva.com/aa/?ref=JUSTY00020120113e81d0008d&pp=1&fcpil=en&napc=S&sa_from=, Media Report, including Wikileaks; http://www.chinadaily.com.cn/business/2011-12/16/content_14278735.htm, Media Report, including Wikileaks; http://www.chinacoop.gov.cn/HTML/2012/01/05/72114.html, Government Source (Donor/Recipient); http://global.factiva.com/aa/?ref=APASENE020131207e9c7000dx&pp=1&fcpil=en&…	7		Ministry of Commerce, Government Agency	Ministry of Commerce, Government Agency	1			Checked	1	OOF-like	3	Mixed (Some Development)	6	Active	1	http://global.factiva.com/aa/?ref=JUSTY00020120113e81d0008d&pp=1&fcpil=en&napc=S&sa_from=, Media Report, including Wikileaks; http://global.factiva.com/aa/?ref=APASENE020131207e9c7000dx&pp=1&fcpil=en&napc=S&sa_from= , Media Report, including Wikileaks	20000000	USD	1.20634	1	1.6579e+07	1.13667	1.88449e+07	20000000					1	Africa, regional		298	Africa, regional	Africa, regional	XR
1130	China	Training for new leather technology	2008	FALSE	In June 2008, the Chinese government paid for the students from 36 countries, including Kenya, to come to Beijing to learn how to turn cattle hides into finished leather using the latest technology. The countries participating include Tanzania, Eritrea, Ethiopia, Zimbabwe, Zambia, Sierra Leone, Nigeria and more from South America and Asia. China's Ministry of Commerce funded students' flights, ac…	320	Industry, Mining, Construction		Implementation	2	Scholarships/training in the donor country	Africa, regional	http://www.clf.cn/news.php?id=592, Other; http://news.tootoo.com/Chemicals/Organic_Chemicals/20080710/135123.html, Media Report, including Wikileaks	2	China Ministry of Commerce, Government Agency	Kenya, Government Agency; China Leather and Footwear Industry Research Institute, Academic, Training and Research	China Ministry of Commerce, Government Agency; China Leather and Footwear Industry Research Institute, Academic, Training and Research	2	Kenya, Government Agency	1	Checked	1	ODA-like	2	Development	1	Active	1							1.13667	0		2008-06-01			2008-07-01	1	Africa, regional		298	Africa, regional	Africa, regional	XR
30108	China	China offers Uganda loan for the construction of fiber-optic infrastructure	2007	FALSE	In 2007, Uganda and the Exim Bank of China signed an agreement for a loan worth 106 million USD for the construction of the National Data Transmission Backbone Infrastructure (NBI) and the funding of the Electronic Government Infrastructure (EGI) initiative (some earlier sources have indicated the loan was for 120 million USD). The loan has an interest rate of 2%, a grace period of 5 years and a …	220	Communications		Implementation	2	Loan (excluding debt rescheduling)	Africa, regional	http://global.factiva.com/aa/?ref=AFNWS00020061113e2bd000tf&pp=1&fcpil=en&napc=S&sa_from=, Media Report, including Wikileaks; http://www.columbia.edu/itc/sipa/nelson/newmediadev/china.html, Other Official Source (non-Donor, non-Recipient); www.cbcglobal.org/images/uploads/library/Minister_presentation.ppt?, Government Source (Donor/Recipient); http://ugandaradionetwork.com/a/story.php?s=15075, Me…	9	Export-Import Bank of China, Government Agency	Huawei Technologies Co., Ltd., Private Sector	Export-Import Bank of China, Government Agency; Huawei Technologies Co., Ltd., Private Sector	2			Checked	1	ODA-like	2	Development	1	Active	1	http://global.factiva.com/aa/?ref=AFNWS00020061113e2bd000tf&pp=1&fcpil=en&napc=S&sa_from=, Media Report, including Wikileaks; http://global.factiva.com/aa/?ref=AFNWS00020061113e2bd000tf&pp=1&fcpil=en&napc=S&sa_from=, Media Report, including Wikileaks	106000000	USD	0.837995	1	1.26492e+08	1.13667	1.43781e+08	106000000					1	Africa, regional		298	Africa, regional	Africa, regional	XR
962	China	Expansion of AU headquarters and conference center	2006	FALSE	At the 2006 Forum on China-Africa Cooperation in Beijing, China announced its full support for the construction of a new conference centre for the Africa Union. In May 2007, China agreed to spend $150 million to expand the African Union (AU) headquarters in Addis Ababa, Ethiopia. Then, on January 11, 2008, China signed an addition agreement for a $61 million conference center attached to the head…	150	Government and Civil Society		Completion	3	Grant	Africa, regional	http://www.bbc.co.uk/news/world-africa-16770932, Media Report, including Wikileaks; http://global.factiva.com/aa/?ref=AFNWS00020070528e35s000md&pp=1&fcpil=en&napc=S&sa_from=, Media Report, including Wikileaks; http://english.cntv.cn/program/newsupdate/20120129/102944.shtml, Media Report, including Wikileaks; http://legacy.utsandiego.com/news/world/20080111-0655-africa-china-.html, Media Report, i…	6					African Union, Multilateral	1	Checked	1	ODA-like	2	Development	1	Active	1	http://global.factiva.com/aa/?ref=AFNWS00020070528e35s000md&pp=1&fcpil=en&napc=S&sa_from=, Media Report, including Wikileaks	200000000	USD	0.743052	1	2.6916e+08	1.13667	3.05947e+08	200000000	2009-01-01		2012-01-28		1	Africa, regional		298	Africa, regional	Africa, regional	XR
34839	China	Chinese experts sent to Madagascar, Kenya, and Cameroon for malaria training	2003	FALSE	According to a 2011 Working Series report, in July-August 2003, two anti-malaria training programmes ran in Madagascar, Kenya and Cameroon. In Nairobi, six Chinese experts and 28 African participants from 14 countries attended the one-week training course. In the same year, distinguished malaria expert Gao Qi went to Madagascar, Kenya and Cameroon to give training courses on the control and preve…	120	Health		Completion	3	Free-standing technical assistance	Africa, regional	http://nai.diva-portal.org/smash/get/diva2:399727/FULLTEXT02, Other Academic (Working Paper, Dissertation)	1							Checked	1	ODA-like	2	Development	1	Active	1							1.13667	0						1	Africa, regional		298	Africa, regional	Africa, regional	XR
16311	China	$1 billion of debt African cancelled; may not be bilateral	2000	FALSE	At the first China-Africa Forum held in Beijing in 2000, China agreed to cancel 1 billion USD in African debts. It also placed 190 products from 28 African countries on a tariff free roster. STAFF_NOTE: Preferential tariff agreements are not counted as official or unofficial development finance. There is no confirmation of which particular debts were cancelled.	600	Action Relating to Debt		Completion	3	Debt forgiveness	Africa, regional	http://www.africaneconomicoutlook.org/en/in-depth/emerging-partners/industrialisation-debt-and-governance-more-fear-than-harm/transparency-needed-to-end-debt-sustainability-fears/, Implementing/Intermediary Agency Source; http://global.factiva.com/aa/?ref=AFBZ000020060724e27100002&pp=1&fcpil=en&napc=S&sa_from=, Media Report, including Wikileaks; http://www.focac.org/chn/ltda/dyjbzjhy/hxxd12009/, …	3							Checked	1	ODA-like	2	Development	1	Active	1	http://global.factiva.com/aa/?ref=AFBZ000020060724e27100002&pp=1&fcpil=en&napc=S&sa_from=, Media Report, including Wikileaks	1000000000	USD	0.58919	1	1697245819	1.13667	1929214210	1000000000					1	Africa, regional		298	Africa, regional	Africa, regional	XR
784	China	De-mining training courses	2007	FALSE	From 2007 to 2009, China held de-mining training courses for Angola, Mozambique, Chad, Burundi, Guinea-Bissau, and both northern and southern Sudan.	150	Government and Civil Society		Completion	3	Scholarships/training in the donor country	Africa, regional, Angola, Burundi, Chad, Guinea-Bissau, Mozambique	http://www.china-un.org/eng/gyzg/t534184.htm, Media Report, including Wikileaks	1							Checked	1	ODA-like	2	Development	1	Active	1							1.13667	0			2007-01-01		2009-01-01	6	Africa, regional	516; 483; 541; 540; ; 404	228; 232; 259; 225; 298; 244	Burundi; Chad; Mozambique; Angola; Africa, regional; Guinea-Bissau	BDI; TCD; MOZ; AGO; Africa, regional; GNB	BI; TD; MZ; AO; XR; GW	108; 148; 508; 24; ; 624
801	China	Aid Packages	2010	FALSE	During the 2010 Forum for Economic and Trade Cooperation between China and Portuguese speaking countries in Macau, Wen Jiaobao announced relief packages worth 3.56 billion yuan to Angola, Cape Verde, Guinea Bissau, Mozambique, and East Timor. Part of this money (10 million yuan) may go to the poorer nations for medical equipment and infrastructure. This project is linked to ID #s 797, 798 in whic…	700	Emergency Response		Pipeline: Pledge	12	Grant	Africa, regional, Angola, Cape Verde, Guinea-Bissau, Mozambique, Timor-Leste	http://global.factiva.com/aa/?ref=KYODO00020101113e6bd002jp&pp=1&fcpil=en&napc=S&sa_from=, Media Report, including Wikileaks; http://www.google.com/url?q=http://www.macauhub.com.mo/en/2011/01/03/new-year-arrives-with-trade-and-projects-on-the-rise-between-china-and-portuguese-speaking-countries/&sa=D&usg=ALhdy28JKEl54-qsJrsL95j45XwPItAzwA, Media Report, including Wikileaks; http://www.google.com/…	6							Checked	1	ODA-like	2	Development	1	Active	1	http://global.factiva.com/aa/?ref=KYODO00020101113e6bd002jp&pp=1&fcpil=en&napc=S&sa_from=, Media Report, including Wikileaks						1.13667	0					2013-01-01	6	Africa, regional	540; ; 541; ; 404; 402	225; 765; 259; 298; 244; 230	Angola; Timor-Leste; Mozambique; Africa, regional; Guinea-Bissau; Cape Verde	AGO; TLS; MOZ; Africa, regional; GNB; CPV	AO; TL; MZ; XR; GW; CV	24; ; 508; ; 624; 132
799	China	Debt waived	2010	FALSE	In 2010, Wen Jiaobao announced that China had offered relief packages worth 3.56 billion yuan to Angola, Cape Verde, Guinea Bissau, Mozambique, and East Timor, and had waived about 230 million yuan worth of expired government debt to China. STAFF_NOTE: The triangular development article mentions China's intention to provide debt relief without going into too much detail.	600	Action Relating to Debt		Completion	3	Debt forgiveness	Africa, regional, Angola, Cape Verde, Guinea-Bissau, Mozambique, Timor-Leste	http://global.factiva.com/aa/?ref=KYODO00020101113e6bd002jp&pp=1&fcpil=en&napc=S&sa_from=, Media Report, including Wikileaks; http://tl.chineseembassy.org/eng/xwdt/t769545.htm, Government Source (Donor/Recipient); http://portal.gov.mo/web/guest/info_detail?infoid=278029, Government Source (Donor/Recipient); http://english.mofcom.gov.cn/aarticle/newsrelease/significantnews/201011/20101107254586.ht…	4							Checked	1	ODA-like	2	Development	1	Active	1	http://global.factiva.com/aa/?ref=KYODO00020101113e6bd002jp&pp=1&fcpil=en&napc=S&sa_from=, Media Report, including Wikileaks	230000000	CNY	1.07564	6.77027	3.1583e+07	1.13667	3.58996e+07	3.39721e+07				2013-01-01	6	Africa, regional	; 541; 540; ; 402; 404	298; 259; 225; 765; 230; 244	Africa, regional; Mozambique; Angola; Timor-Leste; Cape Verde; Guinea-Bissau	Africa, regional; MOZ; AGO; TLS; CPV; GNB	XR; MZ; AO; TL; CV; GW	; 508; 24; ; 132; 624
804	China	Medical equipment	2010	FALSE	On November 13, 2010, Chinese Premier Wen Jiabao announced that China will launch a series of measures between 2010 and 2013 to help boost the development of less-developed Portuguese-speaking countries. China planned to provide 10 million yuan worth of medical equipment to these countries, which includes Guinea Bissau.	120	Health		Pipeline: Pledge	12	Grant	Africa, regional, Angola, Cape Verde, Guinea-Bissau, Mozambique, Timor-Leste	http://vlex.cn/vid/proposes-assist-developed-speaking-227659735, Media Report, including Wikileaks; http://tl.chineseembassy.org/eng/xwdt/t769545.htm, Government Source (Donor/Recipient); http://portal.gov.mo/web/guest/info_detail?infoid=278029, Government Source (Donor/Recipient); http://english.mofcom.gov.cn/aarticle/newsrelease/significantnews/201011/20101107254586.html, Government Source (Don…	4							Checked	1	ODA-like	2	Development	1	Active	1		10000000	USD	1.07564	1	9.29676e+06	1.13667	1.05674e+07	10000000				2013-01-01	6	Africa, regional	540; ; 541; 402; 404;	225; 765; 259; 230; 244; 298	Angola; Timor-Leste; Mozambique; Cape Verde; Guinea-Bissau; Africa, regional	AGO; TLS; MOZ; CPV; GNB; Africa, regional	AO; TL; MZ; CV; GW; XR	24; ; 508; 132; 624;
803	China	Scholarships	2010	FALSE	On November 13, 2010, Chinese Premier Wen Jiabao announced that China will launch a series of measures between 2010 and 2013 to help boost the development of less-developed Portuguese-speaking countries. China will provide government-sponsored scholarships, lasting for one year, to 1,000 students in these countries, which includes Guinea Bissau.	110	Education		Pipeline: Pledge	12	Scholarships/training in the donor country	Africa, regional, Angola, Cape Verde, Guinea-Bissau, Mozambique, Timor-Leste	http://vlex.cn/vid/proposes-assist-developed-speaking-227659735, Media Report, including Wikileaks; http://portal.gov.mo/web/guest/info_detail?infoid=278029, Government Source (Donor/Recipient); http://english.mofcom.gov.cn/aarticle/newsrelease/significantnews/201011/20101107254586.html, Government Source (Donor/Recipient)	3							Checked	1	ODA-like	2	Development	1	Active	1							1.13667	0					2013-01-01	6	Africa, regional	; 541; ; 402; 404; 540	298; 259; 765; 230; 244; 225	Africa, regional; Mozambique; Timor-Leste; Cape Verde; Guinea-Bissau; Angola	Africa, regional; MOZ; TLS; CPV; GNB; AGO	XR; MZ; TL; CV; GW; AO	; 508; ; 132; 624; 24
802	China	Training of Officials and Training Center	2010	FALSE	In November 2010, Chinese Premier Wen Jiaobao announced that China would help train 1,500 officials and technical personnel in Portuguese speaking countries (Angola, Brazil, Cape Verde, Guinea Bissau, Mozambique, Portugal and Timor-Leste), give full support to the establishment of a training center affiliated to the Forum in Macao SAR, and provide government-sponsored scholarships, lasting for on…	150	Government and Civil Society		Pipeline: Pledge	12	Scholarships/training in the donor country	Africa, regional, Angola, Cape Verde, Guinea-Bissau, Mozambique, Timor-Leste	http://vlex.cn/vid/proposes-assist-developed-speaking-227659735, Media Report, including Wikileaks; http://tl.chineseembassy.org/eng/xwdt/t769545.htm, Government Source (Donor/Recipient); http://portal.gov.mo/web/guest/info_detail?infoid=278029, Government Source (Donor/Recipient); http://english.mofcom.gov.cn/aarticle/newsrelease/significantnews/201011/20101107254586.html, Government Source (Don…	4							Checked	1	ODA-like	2	Development	1	Active	1							1.13667	0					2013-01-01	6	Africa, regional	; ; 540; 541; 402; 404	298; 765; 225; 259; 230; 244	Africa, regional; Timor-Leste; Angola; Mozambique; Cape Verde; Guinea-Bissau	Africa, regional; TLS; AGO; MOZ; CPV; GNB	XR; TL; AO; MZ; CV; GW	; ; 24; 508; 132; 624
601	China	Mine-Sweeping Equipment and Training for multiple African Nations	2001	FALSE	On November 12, 2001, China donated mine-sweeping equipment to Eritrea. Chinese Ambassador to Eritrea Chen Zhanfu, Eritrean officials and Chinese military experts were present at the ceremony. Officials from the Chinese embassy said that Chinese military experts will conduct personnel training for Eritrea and go on a fact-finding mission to learn about landmine conditions in the country. The stat…	150	Government and Civil Society		Implementation	2	Grant	Africa, regional, Angola, Eritrea, Ethiopia, Namibia, Rwanda	http://maic.jmu.edu/journal/10.2/notes/dequan/dequan.htm, Other Official Source (non-Donor, non-Recipient); http://global.factiva.com/aa/?ref=xnews00020011117dxbg00015&pp=1&fcpil=en&napc=S&sa_from=, Media Report, including Wikileaks; http://news.xinhuanet.com/english/2002-12/10/content_654840.htm, Government Source (Donor/Recipient)	3							Checked	1	ODA-like	2	Development	1	Active	1	http://global.factiva.com/aa/?ref=xnews00020011117dxbg00015&pp=1&fcpil=en&napc=S&sa_from=, Media Report, including Wikileaks						1.13667	0		2011-11-12				6	Africa, regional	565; ; 531; 517; 530; 540	275; 298; 271; 266; 238; 225	Namibia; Africa, regional; Eritrea; Rwanda; Ethiopia; Angola	NAM; Africa, regional; ERI; RWA; ETH; AGO	NA; XR; ER; RW; ET; AO	516; ; 232; 646; 231; 24
570	China	De-mining training workshop	2000	FALSE	The Chinese government and the Mine Action Service of the United Nations Department of Peacekeeping Operations are co-sponsoring another training workshop on de-mining technology from May to June 2000, with trainees from Angola, Ethiopia, Mozambique, and Rwanda.	150	Government and Civil Society		Completion	3	Scholarships/training in the donor country	Africa, regional, Angola, Eritrea, Ethiopia, Namibia, Rwanda	http://global.factiva.com/aa/?ref=bbcapp0020010804dwcc007hc&pp=1&fcpil=en&napc=S&sa_from=, Media Report, including Wikileaks	1		Department of Peacekeeping Operations of the United Nations (DPKO), Multilateral					Checked	1	ODA-like	2	Development	1	Active	1	http://global.factiva.com/aa/?ref=bbcapp0020010804dwcc007hc&pp=1&fcpil=en&napc=S&sa_from=, Media Report, including Wikileaks						1.13667	0						6	Africa, regional	517; ; 540; 531; 530; 565	266; 298; 225; 271; 238; 275	Rwanda; Africa, regional; Angola; Eritrea; Ethiopia; Namibia	RWA; Africa, regional; AGO; ERI; ETH; NAM	RW; XR; AO; ER; ET; NA	646; ; 24; 232; 231; 516
1677	China	Solar energy technician training	2004	FALSE	On August 24, 2004, 18 trainees from 10 countries, including Angola, Ghana, Kenya, Lesotho, Nigeria, Rwanda, and Sudan, received diplomas from Chinese experts ending their two-month training session on solar energy technologies in Gansu Province, northwest China. The workshop was sponsored by the Gansu Natural Energy Research Institute and the Asia-Pacific Research and Training Center for Solar E…	230	Energy Generation and Supply	Solar Power	Completion	3	Scholarships/training in the donor country	Africa, regional, Angola, Ghana, Kenya, Lesotho, Nigeria, Rwanda, Sudan	http://vlex.cn/vid/trains-technicians-use-solar-energy-196522099, Media Report, including Wikileaks; http://news.xinhuanet.com/english/china/2014-07/10/c_133474011.htm, Government Source (Donor/Recipient)	2	Gansu Natural Energy Research Institute, Academic, Training and Research; Asia-Pacific Research and Training Center for Solar Energy, Academic, Training and Research		International Solar Energy Training Workshop; Gansu Natural Energy Research Institute, Academic, Training and Research; Asia-Pacific Research and Training Center for Solar Energy, Academic, Training and Research	3			Checked	1	ODA-like	2	Development	1	Active	1							1.13667	0		2004-06-01		2004-08-24		8	Africa, regional	625; 517; 475; ; 570; 452; 501; 540	278; 266; 261; 298; 249; 241; 248; 225	Sudan; Rwanda; Nigeria; Africa, regional; Lesotho; Ghana; Kenya; Angola	SDN; RWA; NGA; Africa, regional; LSO; GHA; KEN; AGO	SD; RW; NG; XR; LS; GH; KE; AO	736; 646; 566; ; 426; 288; 404; 24
34608	China	Exim Bank to provide $2 billion in funding for Chad-Sudan Railway	2011	FALSE	On March 14, 2014 a 5.6 billion USD agreement was signed between China Civil Engineering Construction Corporation and Chad's Transport Minister for the construction of a 1,344 km railway network. The first phase will link Abï¿½chï¿½ to Andrï¿½ on the border with Sudan, and Moundou to Ngaounderï¿½ on the border with Cameroon. The second phase will connect Moundou with N'Djamena and connected Chad'…	210	Transport and Storage		Pipeline: Commitment	11	Loan (excluding debt rescheduling)	Africa, regional, Chad, Sudan	http://www.brookings.edu/blogs/africa-in-focus/posts/2014/09/26-chinese-railways-in-africa-sun, Other Academic (Working Paper, Dissertation); http://www.railwaysafrica.com/blog/2011/08/15/sudan-chad-line-mooted/, Implementing/Intermediary Agency Source; http://constructionreviewonline.com/2014/07/sudan-chad-build-railway-us2b/, Media Report, including Wikileaks	3		China Civil Engineering Construction Corporation (CCECC), State-Owned Company					Checked	1	OOF-like	3	Mixed (Some Development)	6	Active	1		2000000000	USD	1.20634	1	1657900823	1.13667	1884491799	2000000000					3	Africa, regional	; 625; 483	298; 278; 232	Africa, regional; Sudan; Chad	Africa, regional; SDN; TCD	XR; SD; TD	; 736; 148
698	China	Debt Reduction or Exemption Agreement (unclear which)	2002	FALSE	On April 24, 2002, Chinese President Jiang Zemin held talks with Ivory Coast President Laurent Gbagbo in China. China signed debt reduction or exemption agreements with over 30 African countries, including the Ivory Coast.	600	Action Relating to Debt		Completion	3	Debt forgiveness	Africa, regional, Cote D'Ivoire	http://global.factiva.com/aa/?ref=bbcap00020020424dy4o004xt&pp=1&fcpil=en&napc=S&sa_from=, Media Report, including Wikileaks	1							Checked	1	ODA-like	2	Development	1	Active	1	http://global.factiva.com/aa/?ref=bbcap00020020424dy4o004xt&pp=1&fcpil=en&napc=S&sa_from=, Media Report, including Wikileaks						1.13667	0						2	Africa, regional	437;	247; 298	Cote D'Ivoire; Africa, regional	CIV; Africa, regional	CI; XR	384;
16216	China	Sports Cooperation and Training	2006	FALSE	Sports delegations between China and Africa occurred frequently since 2000. The Chinese signed agreements with South Africa, Lesotho, Egypt, and Tunisia to continue the sports cooperation. China sent 38 coaches of 13 events to 12 different countries to help foster improvement. The amount and specific dates are unknown. STAFF_NOTES: Since sports assistance is categorized under Sports and Cultural …	160	Other Social infrastructure and services	Sports	Completion	3	Free-standing technical assistance	Africa, regional, Egypt, Lesotho, South Africa, Tunisia	http://global.factiva.com/aa/?ref=XNEWS00020061021e2ah00795&pp=1&fcpil=en&napc=S&sa_from=, Media Report, including Wikileaks	1							Checked	1	ODA-like	2	Development	1	Active	1	http://global.factiva.com/aa/?ref=XNEWS00020061021e2ah00795&pp=1&fcpil=en&napc=S&sa_from=, Media Report, including Wikileaks						1.13667	0						5	Africa, regional	570; ; 651; 616; 560	249; 298; 142; 139; 218	Lesotho; Africa, regional; Egypt; Tunisia; South Africa	LSO; Africa, regional; EGY; TUN; ZAF	LS; XR; EG; TN; ZA	426; ; 818; 788; 710
11192	China	Educational and Medical Services	2007	FALSE	In 2007, Chinese Vice-Premier Wu Yi called on a group of 100 Africa-bound experts and volunteers to provide good service to their African hosts. 26 volunteers were sent to work in education and medical services in Mauritius, Tunisia, and Eritrea.The status of the workers is uncertain. STAFF_NOTES: This project was left ODA-like since the Vice-Premier made an announcement for the volunteers. There…	430	Other Multisector	Education and Health	Implementation	2	Free-standing technical assistance	Africa, regional, Eritrea, Mauritius	http://global.factiva.com/aa/?ref=BBCAPP0020071116e3bg003h2&pp=1&fcpil=en&napc=S&sa_from=, Media Report, including Wikileaks	1							Checked	1	ODA-like	2	Development	1	Active	1	http://global.factiva.com/aa/?ref=BBCAPP0020071116e3bg003h2&pp=1&fcpil=en&napc=S&sa_from=, Media Report, including Wikileaks						1.13667	0		2007-11-16				3	Africa, regional	590; ; 531	257; 298; 271	Mauritius; Africa, regional; Eritrea	MUS; Africa, regional; ERI	MU; XR; ER	480; ; 232
1087	China	Agricultural experts and technicians	2003	FALSE	Under the South-South Cooperation program (potentially the SSC Tripartite Agreement), China has sent agricultural experts to Africa. It is unclear how many experts there were or how they helped Ghana, among other countries. One such example of this cooperation was a ten-day training on technology of maize cultivation which opened on August 21, 2003 with the participation of ten African countries …	310	Agriculture, Forestry and Fishing		Completion	3	Scholarships/training in the donor country	Africa, regional, Ethiopia, Ghana, Mali	http://global.factiva.com/aa/?ref=BDU0000020030822dz8m0001y&pp=1&fcpil=en&napc=S&sa_from=, Media Report, including Wikileaks; http://gb.cri.cn/1321/2004/07/13/542@229403.htm, Media Report, including Wikileaks; http://www.fao.org/newsroom/en/news/2004/48027/, Media Report, including Wikileaks; http://www.fao.org/fileadmin/templates/rap/files/epublications/ChinaedocFINAL.pdf, Other Official Source …	4		China National Building Material Company (CNBM), State-Owned Company	China National Building Material Company (CNBM), State-Owned Company	1			Checked	1	ODA-like	2	Development	1	Active	1	http://global.factiva.com/aa/?ref=BDU0000020030822dz8m0001y&pp=1&fcpil=en&napc=S&sa_from=, Media Report, including Wikileaks						1.13667	0						4	Africa, regional	; 530; 432; 452	298; 238; 255; 241	Africa, regional; Ethiopia; Mali; Ghana	Africa, regional; ETH; MLI; GHA	XR; ET; ML; GH	; 231; 466; 288
16026	China	Agricultural Production and Training at Egerton University	2008	FALSE	In 2008, Nanjing Agricultural University held two annual training programs at Egerton University in Kenya: the Quality and Safety of Agro-Products and Crop Greenhouse Production. Over the last few years, the programs have trained over 200 senior agricultural technicians and experts from over 10 African countries.	310	Agriculture, Forestry and Fishing		Implementation	2	Scholarships/training in the donor country	Africa, regional, Kenya	http://www.chinafrica.cn/english/universities/txt/2012-04/27/content_449513.htm, Media Report, including Wikileaks; http://www.chinafrica.cn/english/universities/txt/2012-04/27/content_449513.htm, Media Report, including Wikileaks; http://news.njau.edu.cn/?m=article&id=31806, Media Report, including Wikileaks	3		Nanjing Agricultural University, Academic, Training and Research; Egerton University, Academic, Training and Research	Nanjing Agricultural University, Academic, Training and Research	1	Egerton University, Academic, Training and Research	1	Checked	1	ODA-like	2	Development	1	Active	1							1.13667	0		2008-01-01				2	Africa, regional	; 501	298; 248	Africa, regional; Kenya	Africa, regional; KEN	XR; KE	; 404
1773	China	Donation to train nurses and midwives (Multilateral)	2006	FALSE	A $500,000 dollar donation to train neo-natal nurses and midwives was handed from Chinese Ambassador to South Africa Liu Guijin to the Chief Executive of the New Partnership for Africa's Development (NEPAD), Firmino Muscavele on July 26, 2006, following Wen Jiabao's agreement for support in June of the same year. NEPAD is a strategic framework created by the African Union. The training was planne…	120	Health		Pipeline: Commitment	11	Grant	Africa, regional, Kenya, Tanzania	http://www.china-embassy.org/eng/xw/t265193.htm, Media Report, including Wikileaks	1		New Partnership for Africa's Development (NEPAD), Multilateral			New Partnership for Africa's Development (NEPAD), Multilateral	1	Checked	1	ODA-like	2	Development	1	Active	1		500000	USD	0.743052	1	672900	1.13667	764868	500000					3	Africa, regional	; 501; 510	298; 248; 282	Africa, regional; Kenya; Tanzania	Africa, regional; KEN; TZA	XR; KE; TZ	; 404; 834
30136	China	20 Zimbabwean students receive China Development Bank scholarship	2006	FALSE	In 2006, the Chinese Development Bank launched a scholarship for international students. This merit-based scholarship is part of the China's diplomacy strategy, which aims to encourage economic and financial interaction between China and the rest of the world, promote influences of the Chinese culture, and prepare the next generation for mutually-beneficial cooperation. Between 2006 to 2012, more…	110	Education		Implementation	2	Scholarships/training in the donor country	Africa, regional, Nigeria, Zimbabwe	http://global.factiva.com/aa/?ref=RIAORE0020120110e81a00004&pp=1&fcpil=en&napc=S&sa_from=, Media Report, including Wikileaks	1	China Development Bank (CDB), Government Agency	Ministry of Education, Government Agency	Ministry of Education, Government Agency; China Development Bank (CDB), Government Agency	2			Checked	1	OOF-like	3	Development	1	Active	1	http://global.factiva.com/aa/?ref=RIAORE0020120110e81a00004&pp=1&fcpil=en&napc=S&sa_from=, Media Report, including Wikileaks						1.13667	0						3	Africa, regional	552; ; 475	265; 298; 261	Zimbabwe; Africa, regional; Nigeria	ZWE; Africa, regional; NGA	ZW; XR; NG	716; ; 566
34838	China	12th group of anti-malaria experts sent from china to Senegal and Guinea	2009	FALSE	According to a 2011 Working Series report, the Jiangsu Anti-malaria Center sent experts to Senegal to provide anti-malaria training to more than 180 local health officials and medical specialists. In October 2009, the Ministry of Finance and the Ministry of Commerce in China dispatched a group of 4 experts (Zhang Shanying, Xie Hanguo, Lin Minghua, and Wang Yuequn) to Senegal and Guinea to assist …	120	Health		Completion	3	Free-standing technical assistance	Africa, regional, Senegal	http://www.thelancet.com/journals/lancet/article/PIIS0140-6736(14)60725-X/fulltext#article_upsell, Academic Journal Article; http://nai.diva-portal.org/smash/get/diva2:399727/FULLTEXT02, Other Academic (Working Paper, Dissertation); http://www.fjwsb.net.cn/healthNews.asp?main=6&pc=6&cc=314&id=18361, Media Report, including Wikileaks	3							Checked	1	ODA-like	2	Development	1	Active	1							1.13667	0						2	Africa, regional	; 433	298; 269	Africa, regional; Senegal	Africa, regional; SEN	XR; SN	; 686
16356	China	China invites 500 young people to visit	2007	FALSE	In 2007, the Chinese government invited 500 young people from South Africa and other African nations to visit China in the next three years. According to a report, it appears the project has been completed as of 2009.	998	Unallocated / Unspecified		Completion	3	Scholarships/training in the donor country	Africa, regional, South Africa	http://www.fmprc.gov.cn/eng/zxxx/t538257.htm, Government Source (Donor/Recipient); http://global.factiva.com/redir/default.aspx?P=sa&an=XNEWS00020070206e327007vo&cat=a&ep=ASE, Media Report, including Wikileaks	2							Checked	1	ODA-like	2	Development	1	Active	1	http://global.factiva.com/redir/default.aspx?P=sa&an=XNEWS00020070206e327007vo&cat=a&ep=ASE, Media Report, including Wikileaks						1.13667	0			2007-03-01		2010-03-01	2	Africa, regional	; 560	298; 218	Africa, regional; South Africa	Africa, regional; ZAF	XR; ZA	; 710
2408	China	De-mining training course	2008	FALSE	On April 7, 2008, a six week humanitarian de-mining training course for about 20 military officers from Sudan and South Sudan sponsored by the Chinese government was inaugurated at the University of Science and Technology of People's Liberation Army in Nanjing. The amount, current status, and actual end date is unknown. China planned to donate detection and mine sweeping equipment to Sudan at the…	700	Emergency Response		Implementation	2	Scholarships/training in the donor country	Africa, regional, South Sudan, Sudan	http://www.nti.org/media/pdfs/1_1a.pdf?_=1316627912, Media Report, including Wikileaks; http://vlex.cn/vid/humanitarian-mining-training-course-198912391, Media Report, including Wikileaks	2							Checked	1	ODA-like	2	Development	1	Active	1							1.13667	0		2008-04-07			2008-05-19	3	Africa, regional	625; ;	278; 298;	Sudan; Africa, regional;	SDN; Africa, regional; SSD	SD; XR; SS	736; ; 728
1931	China	TAZARA - Forgiveness of Tanzanian Railway Authority Debt	2011	FALSE	In 2011, the Chinese government wrote off roughly 50 percent of the $150 million USD owed by Tazara to the Chinese. The details of the agreement are unclear.	210	Transport and Storage		Completion	3	Debt forgiveness	Africa, regional, Tanzania, Zambia	http://global.factiva.com/aa/?ref=DJCS000020110121e71l0002b&pp=1&fcpil=en&napc=S&sa_from=, Media Report, including Wikileaks; http://www.gov.cn/jrzg/2011-01/20/content_1788683.htm, Government Source (Donor/Recipient); http://www.daily-mail.co.zm/?p=293, Media Report, including Wikileaks	3		Tanzania-Zambia Railway Authority (TAZARA), State-Owned Company					Checked	1	ODA-like	2	Development	1	Active	1	http://global.factiva.com/aa/?ref=DJCS000020110121e71l0002b&pp=1&fcpil=en&napc=S&sa_from=, Media Report, including Wikileaks	75000000	USD	1.20634	1	6.21713e+07	1.13667	7.06684e+07	75000000					3	Africa, regional	; 551; 510	298; 288; 282	Africa, regional; Zambia; Tanzania	Africa, regional; ZMB; TZA	XR; ZM; TZ	; 894; 834
845	China	China provides interest-free loan for renovation of TAZARA railway	2009	FALSE	(PPIAF) The Chinese government has given the Tanzania-Zambia Railways Authority a $39 million USD interest-free loan to revive the operations of the railway network. Communication and Transport Minister Geoggrey Lungwangwa said the funds would be used for 6 new locomotive engines, four wagons, and the repairing of 120 wagons. Approximately $16.4 million USD was used to purchase six mainline locom…	210	Transport and Storage	Transport; Railway	Implementation	2	Loan (excluding debt rescheduling)	Africa, regional, Tanzania, Zambia	http://www.lusakatimes.com/2011/01/13/chinas-soft-loan-enable-tazara-locomotives-wagons/, Media Report, including Wikileaks; http://global.factiva.com/redir/default.aspx?P=sa&an=AFNWS00020110905e795001ns&cat=a&ep=ASE, Media Report, including Wikileaks; http://www.statehouse.gov.zm/index.php/component/content/article/48-featured-items/1988-tazara-chinese-company-sign-164-locomotives-deal, Governme…	9		Tanzania-Zambia Railway Authority (TAZARA), State-Owned Company; China Civil Engineering Construction Corporation (CCECC), State-Owned Company	China Civil Engineering Construction Corporation (CCECC), State-Owned Company	1			Checked	1	ODA-like	2	Development	1	Active	1	http://global.factiva.com/redir/default.aspx?P=sa&an=AFNWS00020110905e795001ns&cat=a&ep=ASE, Media Report, including Wikileaks; http://global.factiva.com/aa/?ref=DJCS000020091231e5cv0006g&pp=1&fcpil=en&napc=S&sa_from=, Media Report, including Wikileaks; http://global.factiva.com/aa/?ref=ATCHBN0020110616e76f00001&pp=1&fcpil=en&napc=S&sa_from=, Media Report, including Wikileaks; http://global.facti…	39900000	USD	1	1	39900000	1.13667	4.53533e+07	39900000		2009-12-01			3	Africa, regional	; 510; 551	298; 282; 288	Africa, regional; Tanzania; Zambia	Africa, regional; TZA; ZMB	XR; TZ; ZM	; 834; 894
14393	China	TAZARA - Loan	2006	FALSE	In 2006, China granted Zambia and Tanzania a joint loan of $10.87 million USD (90 million Yuan) to rehabilitate the Tanzania-Zambia Railway (TAZARA). Each country will receive $5.4 million USD (45 million Yuan), out of which $1 million USD would go towards the rehabilitation of TAZARA. The loan agreement was signed by the minister from the three countries witness by Zambian President Levy Mwanawa…	210	Transport and Storage		Pipeline: Commitment	11	Loan (excluding debt rescheduling)	Africa, regional, Tanzania, Zambia	http://global.factiva.com/aa/?ref=LQAF000020041116e0bg0003u&pp=1&fcpil=en&napc=S&sa_from=, Media Report, including Wikileaks	1							Checked	1	Vague (Official Finance)	5	Development	1	Active	1	http://global.factiva.com/aa/?ref=LQAF000020041116e0bg0003u&pp=1&fcpil=en&napc=S&sa_from=, Media Report, including Wikileaks	90000000	CNY	0.743052	7.97344	1.51907e+07	1.13667	1.72669e+07	1.12875e+07		2005-01-01			3	Africa, regional	510; 551;	282; 288; 298	Tanzania; Zambia; Africa, regional	TZA; ZMB; Africa, regional	TZ; ZM; XR	834; 894;
2276	China	TAZARA - Equipment	2006	FALSE	In 2006, China donated new equipment and machinery worth $5 million USD to Tazara. Composing this equipment is 50 light truck trolleys, 50 sets of 50 ton covered wagons, and four sets of 10 ton forklifts. Other equipment includes four sets of eight tonne mobile cranes, with spare parts and 20 sets of 80 tonne hydraulic jacks, also with spares.	210	Transport and Storage		Completion	3	Grant	Africa, regional, Tanzania, Zambia	http://business.highbeam.com/3548/article-1G1-153541776/tazara-gets-5-million-worth-equipment, Media Report, including Wikileaks	1		Tanzania-Zambia Railway Authority (TAZARA), State-Owned Company					Checked	1	ODA-like	2	Development	1	Active	1		5000000	USD	0.743052	1	6.729e+06	1.13667	7.64868e+06	5000000					3	Africa, regional	510; 551;	282; 288; 298	Tanzania; Zambia; Africa, regional	TZA; ZMB; Africa, regional	TZ; ZM; XR	834; 894;
2302	China	Zambia contracts railway loans from China	2005	FALSE	In July of 2005, the Zambian government contracted a total of eight external loans amounting to over $110m US dollars from the time Zambia reached the Highly Indebted Poor Countries (HIPC) completion point in April 2005. Among those loans included a $6.2 million USD loan from the Chinese government for the capitalization of the Tanzania-Zambia Railway (TAZARA). It is unclear how the funds were us…	210	Transport and Storage		Pipeline: Commitment	11	Loan (excluding debt rescheduling)	Africa, regional, Tanzania, Zambia	http://global.factiva.com/aa/?ref=BBCAPP0020070711e37b003ec&pp=1&fcpil=en&napc=S&sa_from=, Media Report, including Wikileaks	1		Tanzania-Zambia Railway Authority (TAZARA), State-Owned Company					Checked	1	Vague (Official Finance)	5	Mixed (Some Development)	6	Active	1	http://global.factiva.com/aa/?ref=BBCAPP0020070711e37b003ec&pp=1&fcpil=en&napc=S&sa_from=, Media Report, including Wikileaks	6200000	USD	0.696651	1	8.89972e+06	1.13667	1.01161e+07	6200000					3	Africa, regional	; 510; 551	298; 282; 288	Africa, regional; Tanzania; Zambia	Africa, regional; TZA; ZMB	XR; TZ; ZM	; 834; 894
1364	China	TAZARA - Railway Grant	2001	FALSE	In July 2001, the Chinese government donated 10.5 billion TZS to the Tanzania-Zambia Railway authority to improve its services, buy spares, improve the technical department, and improve the status of TAZARA. The current status of the projects financed with this grant is unknown.	210	Transport and Storage		Implementation	2	Grant	Africa, regional, Tanzania, Zambia	http://global.factiva.com/aa/?ref=bbcap00020010719dx7j00461&pp=1&fcpil=en&napc=S&sa_from=, Media Report, including Wikileaks	1		Tanzania-Zambia Railway Authority (TAZARA), State-Owned Company					Checked	1	ODA-like	2	Development	1	Active	1	http://global.factiva.com/aa/?ref=bbcap00020010719dx7j00461&pp=1&fcpil=en&napc=S&sa_from=, Media Report, including Wikileaks	10500000000	TZS	0.60139	876.412	1.99216e+07	1.13667	2.26444e+07	1.19807e+07					3	Africa, regional	; 551; 510	298; 288; 282	Africa, regional; Zambia; Tanzania	Africa, regional; ZMB; TZA	XR; ZM; TZ	; 894; 834
823	China	Doctor Visit for the Blind	2010	FALSE	On November 15, 2010, it was announced that the Chinese government was sending a team of eye doctors to Zimbabwe as part of the cooperation program 'Eye for Africa' to treat 300 impaired Zimbabweans alongside local eye specialists. The Chinese specialists, travelling to Zimbabwe under the National Blindness Preventing Group, will screen and treat patients at the Sekuru Kaguvi Eye Unit and the Chi…	120	Health	eye health	Completion	3	Free-standing technical assistance	Africa, regional, Zimbabwe	http://global.factiva.com/aa/?ref=AFNWS00020101125e6bp000dx&pp=1&fcpil=en&napc=S&sa_from=, Media Report, including Wikileaks; http://global.factiva.com/aa/?ref=XNEWS00020101124e6bo009yd&pp=1&fcpil=en&napc=S&sa_from=, Media Report, including Wikileaks; http://news.163.com/10/1113/04/6LBFDV2700014JB5.html, Media Report, including Wikileaks; http://global.factiva.com/aa/?ref=AFNWS00020101115e6bf000e…	5		Zimbabwe Defence Forces (ZDF), Government Agency; Asian Foundation for the Prevention of Blindness (AFPB), Foundation; Eyes for Africa Charity, National NGO	Asian Foundation for the Prevention of Blindness (AFPB), Foundation	1	Zimbabwe Defence Forces (ZDF), Government Agency; Eyes for Africa Charity, National NGO	2	Checked	1	ODA-like	2	Development	1	Active	1	http://global.factiva.com/aa/?ref=AFNWS00020101125e6bp000dx&pp=1&fcpil=en&napc=S&sa_from=, Media Report, including Wikileaks; http://global.factiva.com/aa/?ref=XNEWS00020101124e6bo009yd&pp=1&fcpil=en&napc=S&sa_from=, Media Report, including Wikileaks; http://global.factiva.com/aa/?ref=AFNWS00020101115e6bf000eu&pp=1&fcpil=en&napc=S&sa_from=, Media Report, including Wikileaks						1.13667	0		2010-11-20	2010-11-20	2010-11-26	2010-11-26	2	Africa, regional	; 552	298; 265	Africa, regional; Zimbabwe	Africa, regional; ZWE	XR; ZW	; 716
31780	China	Exchange of Letters on Solar Street Lighting Project	2012	FALSE	On December 29, 2011, China and Algeria signed an exchange of letters on the solar street lighting project. China will offer solar road lighting equipment and installation, commissioning and other technical services to the Algeria Government. No further information has been found regarding the project.	230	Energy Generation and Supply	Energy	Pipeline: Pledge	12	Grant	Algeria	http://dz.mofcom.gov.cn/article/zxhz/sbmy/201201/20120107920618.shtml, Government Source (Donor/Recipient)	1							Checked	1	ODA-like	2	Development	1	Active	1							1.13667	0						1	Algeria	615	130	Algeria	DZA	DZ	12
35581	China	Chinese television plans to open bureau in Algiers	2011	TRUE	According to the African Economic Outlook report on Algeria (2011), Chinese television plans to open a bureau in Algiers and plans organising exchange and information events between the two countries. STAFF_MOTE: No additional information on which company bureau could be found. It is also unclear	220	Communications		Pipeline: Pledge	12	Free-standing technical assistance	Algeria	http://www.africaneconomicoutlook.org/countries/north-africa/algeria/, Other Official Source (non-Donor, non-Recipient)	1							Checked	1	OOF-like	3	Representational	3	Active	1							1.13667	0						1	Algeria	615	130	Algeria	DZA	DZ	12
31785	China	Saline Soil Management Demonstration Project	2011	FALSE	In December 2011, China agreed to a saline soil management demonstration project with Algeria which would involve the China National Agricultural Development Group and the Algeria Agricultural Science Institute. China offered to provide laboratory equipment, agricultural machinery, agricultural experts, and receive Algerian personnel for agricultural training. The project would be funded in part …	310	Agriculture, Forestry and Fishing		Completion	3	Free-standing technical assistance	Algeria	http://dz.mofcom.gov.cn/article/zxhz/sbmy/201112/20111207889487.shtml, Government Source (Donor/Recipient); http://www.sxagri.ac.cn/newsby.asp?id=57803&n=%B1%BE%D4%BA%D0%C2%CE%C5, Other Official Source (non-Donor, non-Recipient); http://news.ifeng.com/a/20140922/42045586_0.shtml, Media Report, including Wikileaks; http://www.zgnfb.com/shownews2-5018-1060-175.html, Implementing/Intermediary Agency…	6	Ministry of Commerce, Government Agency	Shaanxi Agriculture Group, State-Owned Company; China National Agricultural Development Group, State-Owned Company	Ministry of Commerce, Government Agency; Shaanxi Agriculture Group, State-Owned Company; China National Agricultural Development Group, State-Owned Company	3			Checked	1	ODA-like	2	Development	1	Active	1							1.13667	0			2011-12-19	2014-09-26		1	Algeria	615	130	Algeria	DZA	DZ	12
523	China	China donates opera house to Algeria	2010	FALSE	In April 2010, the Director General of Algeria's National Agency of Management of Large Cultural Projects, Zouaoui Benhamdi, and commercial and economic counselor at the Chinese embassy in Algeria signed an agreement for construction of an opera house in Algeria. The construction will be financed by the Chinese government at a total cost of 300 million yuan. The 1,400-seat opera house will be bui…	160	Other Social infrastructure and services	Entertainment	Implementation	2	Grant	Algeria	http://english.peopledaily.com.cn/90001/90776/90883/6952846.html, Media Report, including Wikileaks; http://www.reuters.com/article/2010/04/22/us-algeria-china-opera-idUSTRE63L4HF20100422, Media Report, including Wikileaks; http://www.guardian.co.uk/global-development/2013/apr/29/china-algeria-opera-house, Media Report, including Wikileaks; https://www.facebook.com/events/409797545765339/?ref=22,…	5							Checked	1	Vague (Official Finance)	5	Development	1	Active	1		300000000	CNY	1.07564	6.77027	4.11952e+07	1.13667	4.68255e+07	4.43114e+07	2012-11-01			2014-01-01	1	Algeria	615	130	Algeria	DZA	DZ	12
516	China	Digital Earthquake Networks Center Project	2007	FALSE	In 2007, the China Earthquake Administration aided in the construction of and completed a Digital Earthquake Networks Center in Algeria. The financial value of this project is unknown.	700	Emergency Response		Completion	3	Grant	Algeria	http://www.guxiang86.com/gaige/bjzl/kaifang/200903/79166.html, Implementing/Intermediary Agency Source	1		China Earthquake Administration, Government Agency	China Earthquake Administration, Government Agency	1			Checked	1	ODA-like	2	Development	1	Active	1							1.13667	0				2007-01-01		1	Algeria	615	130	Algeria	DZA	DZ	12
330	China	Preferential loan	2004	FALSE	On February 3, 2004 Algeria and China signed a a framework agreement according to which China would offer Algeria a preferential loan of about 48 million USD. Searches did not reveal any further information about the loan, including the ultimate purpose of the loan, loan terms, implementing agencies, start and end dates, or status of the loan project. Other agreements signed at the same time incl…	998	Unallocated / Unspecified		Pipeline: Commitment	11	Loan (excluding debt rescheduling)	Algeria	http://global.factiva.com/aa/?ref=BBCMEP0020040204e024002s2&pp=1&fcpil=en&napc=S&sa_from=, Media Report, including Wikileaks; http://www.gasandoil.com/news/africa/13d69ae5d4684b82850557a95e5a9ac5, Other Official Source (non-Donor, non-Recipient)	2							Checked	1	Vague (Official Finance)	5	Development	1	Active	1	http://global.factiva.com/aa/?ref=BBCMEP0020040204e024002s2&pp=1&fcpil=en&napc=S&sa_from=, Media Report, including Wikileaks	48000000	USD	0.663629	1	7.23295e+07	1.13667	8.2215e+07	48000000					1	Algeria	615	130	Algeria	DZA	DZ	12
22450	China	Agreement in gas and oil	2004	FALSE	On February 3, 2004 Algeria and China signed five cooperation agreements. One agreement featured a framework cooperation agreement in gas and oil between the minister of energy and mining and the Chinese State Committee for Development and Reform. Results did not reveal further information about the status or details of the project, including project dates or flow type (if any). Other agreements …	320	Industry, Mining, Construction		Pipeline: Commitment	11	Vague TBD	Algeria	http://global.factiva.com/aa/?ref=BBCMEP0020040204e024002s2&pp=1&fcpil=en&napc=S&sa_from=, Media Report, including Wikileaks; http://www.people.com.cn/GB/shizheng/1024/2320485.html, Media Report, including Wikileaks	2			China National Development and Reform Commission, Government Agency	1	Algerian Ministry of Energy and Mining, Government Agency	1	Checked	1	Vague (Official Finance)	5	Mixed (Some Development)	6	Active	1	http://global.factiva.com/aa/?ref=BBCMEP0020040204e024002s2&pp=1&fcpil=en&napc=S&sa_from=, Media Report, including Wikileaks						1.13667	0						1	Algeria	615	130	Algeria	DZA	DZ	12
14	China	Emergency Humanitarian Aid following Earthquake	2003	FALSE	On May 23, 2003 the Chinese Ministry of Commerce announced that China would offer emergency humanitarian aid worth 5 million yuan to the earthquake-hit Algeria. It is unclear how the Ministry of Commerce is involved in the project. On that same day, China sent an earthquake rescue team of 30 personnel to Algeria. The team was headed by a deputy director of the China Seismological Bureau, and prov…	700	Emergency Response		Pipeline: Pledge	12	Grant	Algeria	http://www.todayonhistory.com/5/30/ZhongGuoGuoJiJiuYuanDuiFuAErJiLiYaDiZhenZaiQuJiuYuanYuanManHuiGuo.html, Media Report, including Wikileaks; http://www.cctv.com/english/news/China/Politics/20030524/100092.html, Media Report, including Wikileaks; http://global.factiva.com/aa/?ref=xnews00020030526dz5n0000h&pp=1&fcpil=en&napc=S&sa_from=, Media Report, including Wikileaks; http://top81.jschina.com.c…	5			China Ministry of Commerce, Government Agency	1			Checked	1	ODA-like	2	Development	1	Active	1	http://global.factiva.com/aa/?ref=xnews00020030526dz5n0000h&pp=1&fcpil=en&napc=S&sa_from=, Media Report, including Wikileaks	5000000	CNY	0.620703	8.27704	973221	1.13667	1.10623e+06	604081					1	Algeria	615	130	Algeria	DZA	DZ	12
332	China	China provides interest-free loan to Algeria (2002)	2002	FALSE	Algeria and China signed a $3 million USD interest-free loan, China's contribution designed to boost the Algerian economy. The agreement was signed by the secretary-general of the Algerian Foreign Ministry, Mr Abdelaziz Djerrad, and the Chinese vice-minister at the Ministry of Foreign Trade and Economic Cooperation, Zhou Keren. It is unclear exactly how the loan will be used.	998	Unallocated / Unspecified		Pipeline: Commitment	11	Loan (excluding debt rescheduling)	Algeria	http://global.factiva.com/aa/?ref=bbcmee0020020117dy1g0000d&pp=1&fcpil=en&napc=S&sa_from=, Media Report, including Wikileaks	1							Checked	1	ODA-like	2	Development	1	Active	1	http://global.factiva.com/aa/?ref=bbcmee0020020117dy1g0000d&pp=1&fcpil=en&napc=S&sa_from=, Media Report, including Wikileaks	3000000	USD	0.604911	1	4.95941e+06	1.13667	5.63723e+06	3000000		2002-01-16			1	Algeria	615	130	Algeria	DZA	DZ	12
272	China	China provides $6 million loan to Algeria through economic & technical agreement	2002	FALSE	On August 26, 2002 an official Chinese delegation led by Prime Minister Zhu Rongji signed an economic and technical agreement with Algeria that regulates a USD 6mn loan with 25 years maturity from China. The implementing agency, details of the project and dates are unknown. The delegation and Algeria signed four cooperation agreements in the fields of economy, finance and culture. Other agreement…	998	Unallocated / Unspecified		Pipeline: Commitment	11	Loan (excluding debt rescheduling)	Algeria	http://global.factiva.com/aa/?ref=menat00020020827dy8r000b5&pp=1&fcpil=en&napc=S&sa_from=, Media Report, including Wikileaks	1							Checked	1	Vague (Official Finance)	5	Development	1	Active	1	http://global.factiva.com/aa/?ref=menat00020020827dy8r000b5&pp=1&fcpil=en&napc=S&sa_from=, Media Report, including Wikileaks	6000000	USD	0.604911	1	9.91882e+06	1.13667	1.12745e+07	6000000					1	Algeria	615	130	Algeria	DZA	DZ	12
21879	China	Medical team dispatch	2002	FALSE	On August 26, 2002 an official Chinese delegation led by Prime Minister Zhu Rongji signed several agreements. Some sources state that the agreement provided for the dispatch of a Chinese medical team to Algeria. However, the most detailed source available says that China agreed to send more doctors, particularly surgeons, to join the Chinese medical team already in the country. Other agreements s…	120	Health		Pipeline: Commitment	11	Free-standing technical assistance	Algeria	http://www.google.com/url?sa=t&rct=j&q=&esrc=s&source=web&cd=2&cad=rja&ved=0CCcQFjAB&url=http%2525253A%2525252F%2525252Fghgj.org%2525252FJingPeilongYan.docx&ei=s-5qUMmdAaTI0AGtk4CwDA&usg=AFQjCNHwibJJfMdOyJ4DeH_P_buECwBDkg, NGO/Civil Society/Advocacy; http://www.google.com/url?sa=t&rct=j&q=&esrc=s&source=web&cd=2&cad=rja&ved=0CCcQFjAB&url=http%2525253A%2525252F%2525252Fghgj.org%2525252FJingPeilong…	8							Checked	1	ODA-like	2	Development	1	Active	1	http://global.factiva.com/aa/?ref=menat00020020827dy8r000b5&pp=1&fcpil=en&napc=S&sa_from=, Media Report, including Wikileaks						1.13667	0						1	Algeria	615	130	Algeria	DZA	DZ	12
22429	China	China agrees to modernize Chinese-built ceramics factory in Algeria	2002	FALSE	On August 26, 2002 an official Chinese delegation led by Prime Minister Zhu Rongji signed several agreements. One agreement provided for the continuation of the rehabilitation and modernization of a ceramics Chinese-built factory in Guelma that had started in 1999. Contact information, dates, and amounts are yet unknown. Project #324 is a duplicate. Other agreements include an economic and techni…	320	Industry, Mining, Construction		Pipeline: Commitment	11	Grant	Algeria	http://global.factiva.com/aa/?ref=menat00020020827dy8r000b5&pp=1&fcpil=en&napc=S&sa_from=, Media Report, including Wikileaks; http://www.panapress.com/Algeria,-China-sign-four-co-operation-accords--13-461820-18-lang2-index.html, Media Report, including Wikileaks; http://www.people.com.cn/GB/shizheng/16/20020827/808513.html, Media Report, including Wikileaks	3							Checked	1	OOF-like	3	Commercial	2	Active	1	http://global.factiva.com/aa/?ref=menat00020020827dy8r000b5&pp=1&fcpil=en&napc=S&sa_from=, Media Report, including Wikileaks						1.13667	0						1	Algeria	615	130	Algeria	DZA	DZ	12
30839	China	Rehabiliation and equipping of the Luanda General Hospital	2013	FALSE	On December 18, 2013, Angolan Foreign Secretary of State for Cooperation, ï¿½ngela Braganï¿½a, and the Chinese Ambassador , Gao Kexiang signed an an economic and technical cooperation agreement. According to the agreement, the Government of China is donating 200 million Yuan for the rehabilitation and equipping of the Luanda General Hospital. The 268-bed inpatient building, which is the largest c…	120	Health		Pipeline: Commitment	11	Grant	Angola	http://allafrica.com/stories/201312190167.html, Media Report, including Wikileaks; http://www.cnangola.com/aglhb_view.asp?id=1930, Media Report, including Wikileaks; http://www.macauhub.com.mo/en/2013/12/19/china-provides-aid-to-angola-worth-200-million-yuan/, Media Report, including Wikileaks; http://ao.mofcom.gov.cn/article/zxhz/zzjg/201201/20120107924384.shtml, Government Source (Donor/Recipie…	8	Chinese Government, Government Agency	China Tiesiju Civil Engineering Group Co., Ltd., State-Owned Company	China Tiesiju Civil Engineering Group Co., Ltd., State-Owned Company; Chinese Government, Government Agency	2			Checked	1	ODA-like	2	Development	1	Active	1	http://global.factiva.com/aa/?ref=MENREP0020140104e9cl01eiu&pp=1&fcpil=en&napc=S&sa_from=, Media Report, including Wikileaks	200000000	CNY	1.09	6.195	2.96184e+07	1.13667	3.36665e+07						1	Angola	540	225	Angola	AGO	AO	24
30825	China	CDB Loan to Sonangol	2013	FALSE	In February 2013, China Development Bank to Angolan granted a 1.32 billion USD loan to oil company Sociedade Nacional de Combustï¿½veis de Angola (Sonangol). The loan, which was taken on via Sonangol Finance Limited, will be repaid over a period of 10 years at an agreed interest rate of 3.5 percentage points on Libor (London Interbank Offered Rate).	230	Energy Generation and Supply		Pipeline: Commitment	11	Loan (excluding debt rescheduling)	Angola	http://www.ipim.gov.mo/publish_detail.php?tid=32512&mode=print&lang=en-us, Government Source (Donor/Recipient); http://www.macauhub.com.mo/en/2013/03/11/loan-from-china-development-bank-to-sonangol-is-a-sign-of-the-%E2%80%9Cclose-relationship%E2%80%9D-between-angola-and-china/, Media Report, including Wikileaks; http://www.macauhub.com.mo/en/2013/02/14/china-development-bank-provides-1-billion-eu…	4	China Development Bank (CDB), Government Agency		China Development Bank (CDB), Government Agency	1	Sonangol, State-Owned Company	1	Checked	1	OOF-like	3	Commercial	2	Active	1		1320000000	USD	1.09	1	1211009174	1.13667	1376521939						1	Angola	540	225	Angola	AGO	AO	24
34934	China	3rd Medical Team to Angola	2013	FALSE	On October 24, 2013, China and Angola signed an agreement on dispatching a third medical team of 11 experts to provide free medical services at the General Hospital of Luanda. In December a transition ceremony between the 2nd and the 3rd medical team was held. The team will stay for 2 years. The team itself is comprised of 10 doctors skilled in variety of fields including acupuncture, orthopaedic…	120	Health		Implementation	2	Free-standing technical assistance	Angola	http://www.thelancet.com/journals/lancet/article/PIIS0140-6736(14)60725-X/fulltext#article_upsell, Academic Journal Article; http://ao.mofcom.gov.cn/article/sqfb/201312/20131200416372.shtml, Government Source (Donor/Recipient); http://news.qq.com/a/20140509/040225.htm, Media Report, including Wikileaks; http://www.youtube.com/watch?v=mEbBBtg-Yvk, Media Report, including Wikileaks	4							Checked	1	ODA-like	2	Development	1	Active	1							1.13667	0		2013-12-08				1	Angola	540	225	Angola	AGO	AO	24
30829	China	Construction of Angola International Trade Center	2013	TRUE	In September 2013, the Information Office of the State Council, or China's Cabinet, published a white paper on 'China-Africa Economic and Trade Cooperation', according to which the construction of the Angola International Trade Center, jointly initiated by Chinese and local enterprises, has been started. STAFF_NOTES: No further information is found.	330	Trade and Tourism		Implementation	2	Grant	Angola	http://global.factiva.com/aa/?ref=AFNWS00020130905e995000w8&pp=1&fcpil=en&napc=S&sa_from=, Media Report, including Wikileaks; http://www.chinadaily.com.cn/cndy/2013-08/30/content_16930841.htm, Media Report, including Wikileaks	2							Checked	1	OOF-like	3	Commercial	2	Active	1	http://global.factiva.com/aa/?ref=AFNWS00020130905e995000w8&pp=1&fcpil=en&napc=S&sa_from=, Media Report, including Wikileaks						1.13667	0						1	Angola	540	225	Angola	AGO	AO	24
30827	China	Credit Line to Build Luanda Power Sub-Stations	2013	TRUE	In 2010 it was announced by the chairman of EDEL, an Angolan electricity company, that China would provide a 203 million USD credit line. This funding was to be used to build three electricity sub-stations in Viana, Luanda. The implementing organization for this project is China Machinery Building International. This project is currently underway, however the state of the credit line funding is u…	230	Energy Generation and Supply	power sub-stations	Pipeline: Commitment	11	Loan (excluding debt rescheduling)	Angola	http://global.factiva.com/aa/?ref=LBA0000020130702e972000hh&pp=1&fcpil=en&napc=S&sa_from=, Media Report, including Wikileaks; http://www.iol.co.za/business/international/chinese-power-projects-in-africa-1.1540886#.VQ7eL2TF8YI, Media Report, including Wikileaks; http://www.macauhub.com.mo/en/2010/03/11/8727/, Media Report, including Wikileaks	3		China Machine-Building International Corporation (CMIC), State-Owned Company					Checked	1	OOF-like	3	Mixed (Some Development)	6	Active	1	http://global.factiva.com/aa/?ref=LBA0000020130702e972000hh&pp=1&fcpil=en&napc=S&sa_from=, Media Report, including Wikileaks						1.13667	0						1	Angola	540	225	Angola	AGO	AO	24
30052	China	Construction of agricultural demonstration center	2012	FALSE	On October 31, 2012 Angola and China signed three accords. The first accord provided for the construction of a research and agricultural center, the second exempted 95 percent of Angolan exports from China's tariffs, and the third provided for the rehabilitation and enlargement of the Luanda general hospital (linked to ID #30049). The accords were signed by the Angola's State Secretary of Agricul…	310	Agriculture, Forestry and Fishing		Pipeline: Commitment	11	Free-standing technical assistance	Angola	http://global.factiva.com/aa/?ref=AFNWS00020121101e8b1000c4&pp=1&fcpil=en&napc=S&sa_from=, Media Report, including Wikileaks; http://global.factiva.com/aa/?ref=PLATT00020121101e8b1001jn&pp=1&fcpil=en&napc=S&sa_from=, Media Report, including Wikileaks; http://global.factiva.com/aa/?ref=AFPR000020121101e8b1007ka&pp=1&fcpil=en&napc=S&sa_from=, Media Report, including Wikileaks	3							Checked	1	ODA-like	2	Development	1	Active	1	http://global.factiva.com/aa/?ref=AFNWS00020121101e8b1000c4&pp=1&fcpil=en&napc=S&sa_from=, Media Report, including Wikileaks; http://global.factiva.com/aa/?ref=PLATT00020121101e8b1001jn&pp=1&fcpil=en&napc=S&sa_from=, Media Report, including Wikileaks; http://global.factiva.com/aa/?ref=AFPR000020121101e8b1007ka&pp=1&fcpil=en&napc=S&sa_from=, Media Report, including Wikileaks						1.13667	0						1	Angola	540	225	Angola	AGO	AO	24
30822	China	China constructs Angola-China Friendship School (primary) in Huambo Province, Angola	2012	FALSE	The foundation stone for the construction of an Angola-China Friendship School, in the central Huambo Province, was laid on January 31, 2013, in the framework of the co-operation between both states.The construction of the school is a result of a donation made by China to Angola, and the infrastructure is to be built by a Chinese firm. The project includes the construction of six class rooms, mul…	110	Education		Completion	3	Grant	Angola	http://global.factiva.com/aa/?ref=AFNWS00020130131e91v0012y&pp=1&fcpil=en&napc=S&sa_f, Media Report, including Wikileaks; http://www.portalangop.co.ao/angola/en_us/noticias/educacao/2014/1/9/Huambo-Angola-China-Friendship-School-shows-Government-commitment,d06ea699-7f4a-4151-b09c-f0fe877c104a.html, Media Report, including Wikileaks; http://repository.up.ac.za/bitstream/handle/2263/17253/Kiala_Chi…	6							Checked	1	Vague (Official Finance)	5	Development	1	Active	1	http://global.factiva.com/aa/?ref=AFNWS00020130131e91v0012y&pp=1&fcpil=en&napc=S&sa_f, Media Report, including Wikileaks						1.13667	0		2013-01-31			2013-10-31	1	Angola	540	225	Angola	AGO	AO	24
30049	China	Funding for the renovation of Luanda General Hospital	2012	FALSE	The Angolan government signed a MoU formalizing the intention of cooperation for the rehabilitation, construction and expansion of the General Hospital of Luanda. According to the document, the new building will replace the previous one, built on the same site in 2006 and shut down four years ago after deficiencies were found in its construction. The creation of the new hospital, which has the ca…	120	Health		Pipeline: Pledge	12	Grant	Angola	http://global.factiva.com/aa/?ref=WDAN000020121102e8b20003h&pp=1&fcpil=en&napc=S&sa_from=, Media Report, including Wikileaks; http://global.factiva.com/aa/?ref=AFNWS00020121101e8b1000c4&pp=1&fcpil=en&napc=S&sa_from=, Media Report, including Wikileaks; http://www.portalangop.co.ao/motix/en_us/noticias/saude/2012/3/16/Angola-China-sign-memorandum-for-new-General-Hospital-Luanda,ea71cc03-64c9-4062-a…	4		China Railway Engineering Group Co., Ltd., State-Owned Company	China Railway Engineering Group Co., Ltd., State-Owned Company	1			Checked	1	Vague (Official Finance)	5	Development	1	Active	1	http://global.factiva.com/aa/?ref=WDAN000020121102e8b20003h&pp=1&fcpil=en&napc=S&sa_from=, Media Report, including Wikileaks; http://global.factiva.com/aa/?ref=AFNWS00020121101e8b1000c4&pp=1&fcpil=en&napc=S&sa_from=, Media Report, including Wikileaks	100000000	CNY	1.1898	6.32111	1.32964e+07	1.13667	1.51137e+07	1.582e+07				2014-07-01	1	Angola	540	225	Angola	AGO	AO	24
30050	China	Loan for energy and construction of hospitals and water treatment plants	2012	FALSE	On July 7, 2012 Angola and China Exim Bank signed 17 loan agreements totaling over 500 million USD to be used for the construction of hospitals, energy, and water treatment plants across eight of the country's provinces.	430	Other Multisector		Pipeline: Commitment	11	Loan (excluding debt rescheduling)	Angola	http://global.factiva.com/aa/?ref=AFPR000020120707e877006en&pp=1&fcpil=en&napc=S&sa_from=, Media Report, including Wikileaks; http://www.macauhub.com.mo/en/2012/07/09/angola-takes-out-us500-million-in-loans-from-china-exim-bank/, Media Report, including Wikileaks; http://www.angolahub.com/index.php/en/angola-news/1202-angola-contraiu-500-milhoes-de-dolares-em-emprestimos-junto-do-banco-exim-da-ch…	3	Export-Import Bank of China, Government Agency	Angolan Ministry of Finance, Government Agency	Export-Import Bank of China, Government Agency	1	Angolan Ministry of Finance, Government Agency	1	Checked	1	Vague (Official Finance)	5	Development	1	Active	1	http://global.factiva.com/aa/?ref=AFPR000020120707e877006en&pp=1&fcpil=en&napc=S&sa_from=, Media Report, including Wikileaks	500000000	USD	1.1898	1	4.2024e+08	1.13667	4.77676e+08	500000000					1	Angola	540	225	Angola	AGO	AO	24
31740	China	EXIM to Offer $3 billion Oil-backed Loan	2011	FALSE	In 2011, the Export-Import Bank of China extended a 3 billion USD line of credit to Angola. Like the previous loan packages that China EXIM Bank has given to Angola, this loan will be backed by oil from Angola. No further information about the loan is available at this time. In July 2010, the Angolan Minister of Finance, Carlos Albert Lopes, broadcast on Radio Nacional de Angola that the China EX…	430	Other Multisector		Pipeline: Pledge	12	Loan (excluding debt rescheduling)	Angola	http://journals.sub.uni-hamburg.de/giga/files/journals/3/articles/593/public/593-618-1-PB.pdf, Academic Journal Article; http://www.macauhub.com.mo/en/2011/12/12/angola-owes-us5-6-billion-of-its-loans-from-chinese-financial-institutions/, Media Report, including Wikileaks; https://lup.lub.lu.se/luur/download?func=downloadFile&recordOId=1666736&fileOId=1666737, Other Academic (Working Paper, Disse…	6	Export-Import Bank of China, Government Agency	China Petroleum & Chemical Corporation (Sinopec Ltd.), State-Owned Company	Export-Import Bank of China, Government Agency; China Petroleum & Chemical Corporation (Sinopec Ltd.), State-Owned Company	2			Checked	1	OOF-like	3	Mixed (Some Development)	6	Active	1		3000000000	USD	1.20634	1	2486851234	1.13667	2826737697	3000000000					1	Angola	540	225	Angola	AGO	AO	24
35400	China	2nd medical team	2011	FALSE	China has been sending medical teams to Angola every 2 years since 2009. China orginally signed the agreement to send medical teams to Angola in 2006. Sichuan province is responsible for sending the teams. The second medical team is comprised of 17 members: 3 physicians, 5 surgeons, 2 gynecologists, 3 anesthetists, 1 acupuncturist, 1 pharmacist, 1 medical laboratory technician, and 1 interpreter.…	120	Health		Completion	3	Free-standing technical assistance	Angola	http://ao.mofcom.gov.cn/article/g/201112/20111207889608.shtml, Government Source (Donor/Recipient); http://www.sourcejuice.com/1479917/2011/10/12/Zhong-signed-second-phase-China-send-medical-team-work/, Media Report, including Wikileaks; http://repository.up.ac.za/bitstream/handle/2263/17253/Kiala_China(2010).pdf?sequence=1, Academic Journal Article; http://news.xinhuanet.com/world/2011-10/12/c_1…	7							Checked	1	ODA-like	2	Development	1	Active	1							1.13667	0						1	Angola	540	225	Angola	AGO	AO	24
31796	China	4th Donation of Anti-Malaria Medicine	2011	TRUE	On November 10, 2011, a handover ceremony was staged at the Angolan Ministry of Health in Luanda for the donation of anti-malarial medicine from the Chinese government to the Angolan Ministry of Health. Ambassador Gao Kexiang and Deputy Minister of Health Evelise Frestas were present for the handover on behalf of their respective countries. The donation comprised of 179,520 tablets DUOCOTEXIM, a …	120	Health		Completion	3	Grant	Angola	http://ao.mofcom.gov.cn/article/zxhz/zzjg/201111/20111107824890.shtml, Government Source (Donor/Recipient); http://www.foods1.com/content/1335928/, Media Report, including Wikileaks; http://yule.jinti.com/1159500.htm, Media Report, including Wikileaks; http://www.portalangop.co.ao/angola/en_us/noticias/saude/2011/10/45/China-donates-anti-malaria-medicines,8d91414b-5734-4c50-8aff-3a2c2ed8fd37.html…	4					Ministry of Health	1	Checked	1	ODA-like	2	Development	1	Active	1		2000000	CNY	1.20634	6.46146	256583	1.13667	291651	309528			2011-11-11	2011-11-10	1	Angola	540	225	Angola	AGO	AO	24
68	China	Loan for rebuilding roads	2010	FALSE	In 2010, the Export-Import Bank of China agreed to loan Angola $500 million USD to rebuild roads to help the African nation recover from a three-decade long civil war that ended in 2002. It is unclear how exactly the funds were used.	210	Transport and Storage		Pipeline: Pledge	12	Loan (excluding debt rescheduling)	Angola	http://www.angolahub.com/index.php/en/angola-news/1202-angola-contraiu-500-milhoes-de-dolares-em-emprestimos-junto-do-banco-exim-da-china, Media Report, including Wikileaks; http://global.factiva.com/aa/?ref=LBA0000020100709e67900165&pp=1&fcpil=en&napc=S&sa_from=, Media Report, including Wikileaks; http://www.reuters.com/article/2010/07/09/ozatp-angola-china-loan-idAFJOE6680JK20100709, Media Repo…	4	Export-Import Bank of China, Government Agency		Export-Import Bank of China, Government Agency	1			Checked	1	Vague (Official Finance)	5	Development	1	Active	1	http://global.factiva.com/aa/?ref=LBA0000020100709e67900165&pp=1&fcpil=en&napc=S&sa_from=, Media Report, including Wikileaks	500000000	USD	1.07564	1	4.64838e+08	1.13667	5.28369e+08	500000000					1	Angola	540	225	Angola	AGO	AO	24
70	China	Unspecified Grant for Infrastructure, Energy, and Investment	2010	FALSE	In 2010, China agreed to provide Angola with a 60 million Chinese yuan grant, likely to be used for infrastructure, energy, and investment. It is unclear exactly how the funds were used.	998	Unallocated / Unspecified		Pipeline: Pledge	12	Grant	Angola	http://vlex.cn/vid/roundup-vice-president-trip-achieves-goals-230786199, Media Report, including Wikileaks	1							Checked	1	ODA-like	2	Development	1	Active	1		60000000	CNY	1.07564	6.77027	8.23905e+06	1.13667	9.36511e+06	8.86228e+06					1	Angola	540	225	Angola	AGO	AO	24
67	China	1.2 billion USD credit line for agricultural development	2009	FALSE	In 2009, Angola secured a 1.2 billion USD loan from China to be spent on agricultural sector development. The China Development Bank is funding the loan. The project aims to guarantee the supply of goods like coffee, sisal, sugar cane, and cotton while creating jobs in rural and poor areas. The World Bank believes up to 8 billion USD more has not been publicized; many news reports said more than …	310	Agriculture, Forestry and Fishing		Implementation	2	Loan (excluding debt rescheduling)	Angola	http://www.macaomagazine.net/index.php?option=com_content&view=article&id=119:china-and-angola&catid=40:issue-5, Media Report, including Wikileaks; http://oilprice.com/Geopolitics/Africa/Chinas-Waning-Influence-In-Angola.html, Media Report, including Wikileaks; http://www.google.com/hostednews/afp/article/ALeqM5i0hpgnhmj3GYfBFS8IbzAJ1WDf5w, NGO/Civil Society/Advocacy; http://www.zambian-economist…	11	China Development Bank (CDB), Government Agency	CITIC Group Corporation, State-Owned Company	China Development Bank (CDB), Government Agency; CITIC Group Corporation, State-Owned Company	2			Checked	1	OOF-like	3	Commercial	2	Active	1	http://global.factiva.com/aa/?ref=AFPR000020090312e53c0070z&pp=1&fcpil=en&napc=S&sa_from=, Media Report, including Wikileaks						1.13667	0		2009-08-01			2012-01-01	1	Angola	540	225	Angola	AGO	AO	24
34752	China	Additional Financing for Road, Electricity and Water Systems	2008	FALSE	On July 3, 2008, China agreed provide an additional 135 million USD loan to Angola to support fund road, electricity, and water systems projects. EXIM Bank Governor Li Ruogu visited Luanda to sign the agreement. No further information was provided. STAFF_NOTE: It is not immediately clear if this loan is connected to any of the oil-backed loans that China has given Angola. Furthermore, all online …	430	Other Multisector	Transport, Energy Generation and Supply, Water Supply	Pipeline: Pledge	12	Loan (excluding debt rescheduling)	Angola	http://repository.up.ac.za/bitstream/handle/2263/17253/Kiala_China(2010).pdf?sequence=1, Academic Journal Article; http://uk.reuters.com/article/2008/07/04/angola-china-idUKL046022620080704, Media Report, including Wikileaks	2	Export-Import Bank of China, Government Agency		Export-Import Bank of China, Government Agency	1			Checked	1	Vague (Official Finance)	5	Development	1	Active	1		135000000	USD	0.988996	1	1.36502e+08	1.13667	1.55158e+08	135000000					1	Angola	540	225	Angola	AGO	AO	24
66	China	Complementary Action: Rehabilitation of Roads for Caxito, Uige, and Negage cities (Related to Project ID#64 and ID#65)	2008	FALSE	A complementary individual financing accord was signed in July of 2008 by the Angolan Finance minister, Jose Pedro de Morais, and the chairman of Eximbank, Li Ruogu. It is designed to improve the streets of the cities of Caxito (Bengo), Uige and Negage (Uige), a contract estimated at around US$56 million. As of June 3, 2009, the Chinese company China Road and Bridge Corporation (CRBC) is rebuildi…	210	Transport and Storage	Road	Implementation	2	Loan (excluding debt rescheduling)	Angola	http://www.ide.go.jp/English/Data/Africa_file/Manualreport/cia_11.html, Other Official Source (non-Donor, non-Recipient); http://www.macauhub.com.mo/en/2009/06/03/7165/, Media Report, including Wikileaks; http://global.factiva.com/aa/?ref=AFNWS00020080704e474000qw&pp=1&fcpil=en&napc=S&sa_from=, Media Report, including Wikileaks; http://repository.up.ac.za/bitstream/handle/2263/17253/Kiala_China(2…	7	Export-Import Bank of China, Government Agency	China Road & Bridge Corporation (CRBC), State-Owned Company	Export-Import Bank of China, Government Agency; China Road & Bridge Corporation (CRBC), State-Owned Company	2	Angolan National Roads Institute (INEA), Government Agency	1	Checked	1	OOF-like	3	Development	1	Active	1	http://global.factiva.com/aa/?ref=AFNWS00020080704e474000qw&pp=1&fcpil=en&napc=S&sa_from=, Media Report, including Wikileaks	56336500	USD	0.988996	1	5.69633e+07	1.13667	6.47487e+07	56336500					1	Angola	540	225	Angola	AGO	AO	24
64	China	Electrical network (Related to Project ID#65 and ID#66)	2008	FALSE	A complementary individual financing accord was signed in July of 2008 by the Angolan Finance minister, Jose Pedro de Morais, and the chairman of Eximbank, Li Ruogu. The accord concerns an agreement for funding of the project of rehabilitation and expansion of the electrical network of the cities of Dundo (Lunda Norte province) and Saurimo (Luanda Sul), estimated at around USD 50 million loan. OV…	230	Energy Generation and Supply		Pipeline: Commitment	11	Loan (excluding debt rescheduling)	Angola	http://www.ide.go.jp/English/Data/Africa_file/Manualreport/cia_11.html, Other Official Source (non-Donor, non-Recipient); http://global.factiva.com/aa/?ref=AFNWS00020080704e474000qw&pp=1&fcpil=en&napc=S&sa_from=, Media Report, including Wikileaks; http://cn.reuters.com/article/chinaNews/idCNChina-1593420080704, Media Report, including Wikileaks	3	Export-Import Bank of China, Government Agency		Export-Import Bank of China, Government Agency	1			Checked	1	Vague (Official Finance)	5	Development	1	Active	1	http://global.factiva.com/aa/?ref=AFNWS00020080704e474000qw&pp=1&fcpil=en&napc=S&sa_from=, Media Report, including Wikileaks	50000000	USD	0.988996	1	5.05563e+07	1.13667	5.7466e+07	50000000					1	Angola	540	225	Angola	AGO	AO	24
34898	China	Phase 2: Irrigation for Luena, Caxito, Gandjelas, and Waco-Kungo, Second Phase	2007	FALSE	April 21, 2007 the Chinese corporation Sinohydro Corporation inked a contract with Angola for the second phase of irrigation for Caxito, Gandjelas (alt. Ganjelas), Luena, and Waco-Kungo. The contract value for the project was USD 54,006,958.00 and it was completed March 18, 2009. See Project #34784 for Phase I of this irrigation project. This project is part of Phase 2 of the 2 billion USD loan t…	310	Agriculture, Forestry and Fishing		Completion	3	Loan (excluding debt rescheduling)	Angola	http://www.minfin.gv.ao/fsys/China_Projectos_concluidos%20_2008.pdf, Government Source (Donor/Recipient); http://www.ashgate.com/isbn/9781409448655, Other Academic (Working Paper, Dissertation)	2	Export-Import Bank of China, Government Agency	Sinohydro Corporation, State-Owned Company	Export-Import Bank of China, Government Agency; Sinohydro Corporation, State-Owned Company	2			Checked	1	OOF-like	3	Mixed (Some Development)	6	Active	1		4.86063e+07	USD	0.837995	1	5.80031e+07	1.13667	6.59305e+07	4.86063e+07		2007-09-18	2009-03-18		1	Angola	540	225	Angola	AGO	AO	24
34750	China	Cabinda Link Road Project	2007	FALSE	In 2007 it was reported that China Road and Bridge Corporation had submitted a road project proposal to link Angola's Cabinda Province to Zaire Province. Cabinda Province, located to the north of Angola, is geographically separated from the rest of Angola by a strip of the Democratic Republic of Congo and the Congo River. While four different proposals with varying components were presented in 20…	210	Transport and Storage		Implementation	2	Loan (excluding debt rescheduling)	Angola	http://repository.up.ac.za/bitstream/handle/2263/17253/Kiala_China(2010).pdf?sequence=1, Academic Journal Article; http://www.portalangop.co.ao/angola/en_us/noticias/sociedade/2007/4/21/Cabinda-Zaire-Might-Connected-Road-Until-2011,1e4f80c3-e0da-4227-8f9a-50a2e3443b86.html, Media Report, including Wikileaks; http://www.forbescustom.com/EconomicDevelopmentPgs/CabindaP1.html, Media Report, includin…	6	Export-Import Bank of China, Government Agency	SinoHydro , State-Owned Company; China Road and Bridge Corporation, State-Owned Company	SinoHydro , State-Owned Company; China Road and Bridge Corporation, State-Owned Company; Export-Import Bank of China, Government Agency	3			Checked	1	OOF-like	3	Development	1	Active	1		3000000	USD	0.837995	1	3.57997e+06	1.13667	4.06926e+06	3000000	2008-09-25				1	Angola	540	225	Angola	AGO	AO	24
34751	China	Exim Bank to fund Cunene River Bridge Project	2007	FALSE	In September 2006 the Chinese Road and Bridge Corporation received a grant to construct the Cunene River Bridge Project. The bridge was to span 20km to connect cities of Lubango and Ondjiva; the bridge itself was to be located near Xangongo village in Ombandja municipality in southwestern Angola. The Angolan Roads Agency (INEA) appointed Aurecon, together with its joint venture partners Gabeng an…	210	Transport and Storage		Completion	3	Loan (excluding debt rescheduling)	Angola	http://repository.up.ac.za/bitstream/handle/2263/17253/Kiala_China(2010).pdf?sequence=1, Academic Journal Article; http://www.embangola.at/page3.htm, Government Source (Donor/Recipient); http://www.macauhub.com.mo/en/2011/08/16/new-bridge-of-cunene-river-provides-new-road-link-between-two-angolan-provinces/, Media Report, including Wikileaks; http://www.macauhub.com.mo/cn/2009/08/25/7652/, Media …	6	Export-Import Bank of China, Government Agency	China Road and Bridge Corporation, State-Owned Company	China Road and Bridge Corporation, State-Owned Company; Export-Import Bank of China, Government Agency	2			Checked	1	Vague (Official Finance)	5	Development	1	Active	1		30000000	USD	0.837995	1	3.57997e+07	1.13667	4.06926e+07	30000000	2007-05-01		2009-07-01	2008-07-31	1	Angola	540	225	Angola	AGO	AO	24
34831	China	China extends loan to Angola for hospitals and health centers	2007	FALSE	In September 2007, China EXIM Bank provided Angola with a loan to finance a project for seven municipal hospitals and nine health centres in Angola with contractor Sinohydro. The project contract was worth 72,620,548 USD. As of June 30, 2008, the project's required documents had been sent to China EXIM Bank and was awaiting disbursement of funds. This project is part of the USD 500 million loan p…	120	Health		Pipeline: Commitment	11	Loan (excluding debt rescheduling)	Angola	http://www.ashgate.com/isbn/9781409448655, Other Academic (Working Paper, Dissertation); http://www.minfin.gv.ao/fsys/China_Projectos_concluidos%20_2008.pdf, Government Source (Donor/Recipient); http://www.minfin.gv.ao/docs/dspSaude.htm, Government Source (Donor/Recipient)	3	Export-Import Bank of China, Government Agency	SinoHydro , State-Owned Company	SinoHydro , State-Owned Company; Export-Import Bank of China, Government Agency	2			Checked	1	OOF-like	3	Development	1	Active	1		72620548	USD	0.837995	1	8.66599e+07	1.13667	9.8504e+07	72620548					1	Angola	540	225	Angola	AGO	AO	24
34833	China	China extends loan to Angola for purchasing refrigeration trucks	2007	FALSE	In September 2007, China EXIM Bank provided a loan of 40,000,000 USD to Angola to purchase refrigeration trucks and isothermic vehicles for Angola fisheries. As of June 30, 2008, the commercial contract was being examined by Angola Government Agency GAT (Gabinete de apoio tecnico de gestï¿½o da linha de crï¿½dito da China). This project is part of the USD 500 million loan provided to Angola by Ch…	310	Agriculture, Forestry and Fishing	Trucks and Isothermic Vehicles	Pipeline: Commitment	11	Loan (excluding debt rescheduling)	Angola	http://www.ashgate.com/isbn/9781409448655, Other Academic (Working Paper, Dissertation)	1	Export-Import Bank of China, Government Agency		Export-Import Bank of China, Government Agency	1			Checked	1	OOF-like	3	Development	1	Active	1		40000000	USD	0.837995	1	4.7733e+07	1.13667	5.42568e+07	40000000					1	Angola	540	225	Angola	AGO	AO	24
34834	China	China funds construction of telecommunication lines	2007	FALSE	In September 2007, China EXIM Bank provided Angola with a 60,000,000 USD loan to finance the construction of 418,750 new telecommunication lines throughout the country; the contract value was 65,000,000 USD. As of June 30, 2008, the project's required documents were sent to China EXIM Bank. This project is part of the USD 500 million loan provided to Angola by China on September 28, 2007 (Project…	220	Communications	Telecommunications Lines	Pipeline: Commitment	11	Loan (excluding debt rescheduling)	Angola	http://www.ashgate.com/isbn/9781409448655, Other Academic (Working Paper, Dissertation)	1	Export-Import Bank of China, Government Agency		Export-Import Bank of China, Government Agency	1			Checked	1	OOF-like	3	Development	1	Active	1		60000000	USD	0.837995	1	7.15995e+07	1.13667	8.13852e+07	60000000					1	Angola	540	225	Angola	AGO	AO	24
34827	China	China funds network expansion in Angola	2007	FALSE	In September 2007, China EXIM Bank provided Angola with a loan to support the MT, BT, and IP Network expansion for Caxito City and the Rehabilitation of the Quifangondo-Cazenga line. This activity originated from a previous contract between the two countries for the reconstruction of 60 Kv LT and substation lines between Quifangondo and Mabubas (See #34788). The contract value of this complementa…	230	Energy Generation and Supply		Pipeline: Commitment	11	Loan (excluding debt rescheduling)	Angola	http://www.ashgate.com/isbn/9781409448655, Other Academic (Working Paper, Dissertation); http://www.macauhub.com.mo/en/2008/02/18/4555/, Media Report, including Wikileaks	2	Export-Import Bank of China, Government Agency	China Machine-Building International Corporation (CMIC), State-Owned Company	China Machine-Building International Corporation (CMIC), State-Owned Company; Export-Import Bank of China, Government Agency	2			Checked	1	OOF-like	3	Development	1	Active	1		22903510	USD	0.837995	1	2.73313e+07	1.13667	3.10668e+07	22903510					1	Angola	540	225	Angola	AGO	AO	24
34824	China	China loans Angola funds for technical school in Cabinda	2007	FALSE	In September 2007, the Chinese EXIM Bank provided Angola with a loan to finance the completion of a technical school in Cabinda with contractor Sinohydro. The contract itself was worth 14,216,999.32 USD. As of June 30, 2008, the loan was undergoing preparatory work for the disbursement of funds. This project is part of the USD 500 million loan provided to Angola by China on September 28, 2007 (Pr…	110	Education		Pipeline: Commitment	11	Loan (excluding debt rescheduling)	Angola	http://www.ashgate.com/isbn/9781409448655, Other Academic (Working Paper, Dissertation); http://www.minfin.gv.ao/docs/dspEducacao.htm, Government Source (Donor/Recipient)	2	Export-Import Bank of China, Government Agency	SinoHydro , State-Owned Company	Export-Import Bank of China, Government Agency; SinoHydro , State-Owned Company	2			Checked	1	OOF-like	3	Development	1	Active	1		1.4217e+07	USD	0.837995	1	1.69655e+07	1.13667	1.92842e+07	1.4217e+07					1	Angola	540	225	Angola	AGO	AO	24
34826	China	Complementary Action (#34030): Execution of New Domestic Links (Linked to #34787)	2007	FALSE	In September 2007, China's EXIM Bank provided Angola with a loan to support the execution of 26,000 new domestic links expansion of SE PS05-Catete road, which was a component of phase II of a previous project between China and Angola concerning the rehabilitation and expansion of Luanda's electrical network (See Project #34787). The overall contract of this action was worth 10,659,860.00 USD. As …	230	Energy Generation and Supply		Pipeline: Commitment	11	Loan (excluding debt rescheduling)	Angola	http://www.ashgate.com/isbn/9781409448655, Other Academic (Working Paper, Dissertation)	1	Export-Import Bank of China, Government Agency	China Machine-Building International Corporation (CMIC), State-Owned Company	Export-Import Bank of China, Government Agency; China Machine-Building International Corporation (CMIC), State-Owned Company	2			Checked	1	OOF-like	3	Development	1	Active	1		10659860	USD	0.837995	1	1.27207e+07	1.13667	1.44593e+07	10659860					1	Angola	540	225	Angola	AGO	AO	24
34828	China	Complementary Action (#34030): Expansion of Tab and Water Network	2007	FALSE	In September 2007, China EXIM Bank provided Angola with a loan to finance the expansion of the tab [sic.] and water network in Huambo City, which included 20 fountains, 2000 new domestic connections, and a water treatment plant with one year assistance with systems management. The contract value for the project was worth 9,779,511.51 USD and the contractor was Chinese company CMEC. As of June 30,…	140	Water Supply and Sanitation		Pipeline: Commitment	11	Loan (excluding debt rescheduling)	Angola	http://www.ashgate.com/isbn/9781409448655, Other Academic (Working Paper, Dissertation)	1	Export-Import Bank of China, Government Agency	China Machinery Engineering Corporation (CMEC)	China Machinery Engineering Corporation (CMEC) ; Export-Import Bank of China, Government Agency	2			Checked	1	OOF-like	3	Development	1	Active	1		9.77951e+06	USD	0.837995	1	1.16701e+07	1.13667	1.32651e+07	9.77951e+06					1	Angola	540	225	Angola	AGO	AO	24
34829	China	Complementary Action (#34030): Expansion of Tab and Water Network in Catete and Caxito and Water Treatment in Uige (Linked to #34851)	2007	FALSE	In September 2007, China EXIM Bank provided Angola with a loan worth 6,517,146.93 USD to finance water projects including the expansion of tab (sic.) and water network in Catete and Caxito cities, fountains, 2000 new domestic links, and rehabilitation of a water treatment systems for Uige, and a expansion of water supply network and one-year management assistance. The contractor was CEIEC. As of …	140	Water Supply and Sanitation		Completion	3	Loan (excluding debt rescheduling)	Angola	http://www.ashgate.com/isbn/9781409448655, Other Academic (Working Paper, Dissertation); http://www.macauhub.com.mo/en/2008/02/18/4555/, Media Report, including Wikileaks; http://www.macauhub.com.mo/en/2007/03/08/2660/, Media Report, including Wikileaks; http://www.minfin.gv.ao/fsys/China_Projectos_concluidos%20_2008.pdf, Government Source (Donor/Recipient)	4	Export-Import Bank of China, Government Agency	China National Electric Import & Export Corporation, State-Owned Company	China National Electric Import & Export Corporation, State-Owned Company; Export-Import Bank of China, Government Agency	2			Checked	1	OOF-like	3	Development	1	Active	1		6.51715e+06	USD	0.837995	1	7.77707e+06	1.13667	8.83999e+06	6.51715e+06					1	Angola	540	225	Angola	AGO	AO	24
34830	China	Complementary Action (#34030): Four Regional Hospitals	2007	FALSE	In September 2007, China EXIM Bank provided Angola with a loan to finance a project involving four regional hospitals in Malange, Benguela, Huï¿½la, and Huambo with contractor SinoHydro (See projects #34796, #34798, #34843 and #34845 respectively). The loan was worth 75,917,724.36 USD. As of June 30, 2008, the project's required documents were sent to China EXIM Bank and the project was awaiting …	120	Health		Pipeline: Commitment	11	Loan (excluding debt rescheduling)	Angola	http://www.ashgate.com/isbn/9781409448655, Other Academic (Working Paper, Dissertation)	1	Export-Import Bank of China, Government Agency	SinoHydro , State-Owned Company	SinoHydro , State-Owned Company; Export-Import Bank of China, Government Agency	2			Checked	1	OOF-like	3	Development	1	Active	1		7.59177e+07	USD	0.837995	1	9.05945e+07	1.13667	1.02976e+08	7.59177e+07					1	Angola	540	225	Angola	AGO	AO	24
34832	China	Complementary Action (#34030): Municipal Hospital in Caculama (Linked to #34841)	2007	FALSE	In September 2007, China EXIM Bank provided Angola with a loan to provide additional funding for the municipal hospital in Caculama city, Malanje (Malange) Province. The loan was worth 10,875,000 USD and the project was made with contractor SinoHydro. As of June 30, 2008, the project's required documents had been sent to China EXIM Bank and was awaiting disbursement of funds. The hospital was als…	120	Health		Completion	3	Loan (excluding debt rescheduling)	Angola	http://www.ashgate.com/isbn/9781409448655, Other Academic (Working Paper, Dissertation); http://www.portalangop.co.ao/angola/pt_pt/noticias/saude/2012/0/4/Hospital-municipal-Caculama-carece-energia-agua,206cf4fe-4840-47a3-a569-642d8eec296f.html, Media Report, including Wikileaks; http://www.portalangop.co.ao/angola/pt_pt/noticias/saude/2014/1/9/Malanje-Hospital-Caculama-necessita-medicos-cardiolo…	6	Export-Import Bank of China, Government Agency	SinoHydro , State-Owned Company	SinoHydro , State-Owned Company; Export-Import Bank of China, Government Agency	2			Checked	1	OOF-like	3	Development	1	Active	1		10875000	USD	0.837995	1	1.29774e+07	1.13667	1.47511e+07	10875000					1	Angola	540	225	Angola	AGO	AO	24
65	China	Complemetary Action: Water Projects	2007	FALSE	A complementary individual financing accord was signed in July of 2008 by the Angolan Finance minister, Jose Pedro de Morais, and the chairman of Eximbank, Li Ruogu. The protocol is designed for the rehabilitation of the residual waters treatment station in Quifangondo (Luanda), the construction of a distribution centre in Cacuaco district, as well as the execution of new house plumbing works, es…	140	Water Supply and Sanitation	Water	Pipeline: Commitment	11	Loan (excluding debt rescheduling)	Angola	http://www.ide.go.jp/English/Data/Africa_file/Manualreport/cia_11.html, Other Official Source (non-Donor, non-Recipient); http://global.factiva.com/aa/?ref=AFNWS00020080704e474000qw&pp=1&fcpil=en&napc=S&sa_from=, Media Report, including Wikileaks; http://www.ashgate.com/isbn/9781409448655, Other Academic (Working Paper, Dissertation)	3	Export-Import Bank of China, Government Agency	China Machinery Engineering Corporation (CMEC)	China Machinery Engineering Corporation (CMEC) ; Export-Import Bank of China, Government Agency	2			Checked	1	OOF-like	3	Development	1	Active	1	http://global.factiva.com/aa/?ref=AFNWS00020080704e474000qw&pp=1&fcpil=en&napc=S&sa_from=, Media Report, including Wikileaks	28798000	USD	0.837995	1	3.43654e+07	1.13667	3.90622e+07	28798000					1	Angola	540	225	Angola	AGO	AO	24
34797	China	Exim Bank Provides loan for Malanje Medium Agrarian Institute	2007	FALSE	In September, the Chinese EXIM Bank provided Angola with a loan to finance the rehabilitation of an agricultural school in Kï¿½ssua (Quï¿½ssua) in Malange (Malanje) Province with Chinese contractor CMEC. The school is named the Malanje Medium Agrarian Institute (IMAM). The contract itself was worth 11,964,000 USD. As of June 30, 2008, the loan was undergoing preparatory work for the disbursement …	110	Education		Completion	3	Loan (excluding debt rescheduling)	Angola	http://www.ashgate.com/isbn/9781409448655, Other Academic (Working Paper, Dissertation); http://allafrica.com/stories/200902090900.html, Media Report, including Wikileaks; http://allafrica.com/stories/200901220096.html, Media Report, including Wikileaks; http://www.portalangop.co.ao/angola/en_us/noticias/politica/2007/5/23/Head-State-Inaugurates-Malanje-Medium-Agrarian-Institute,593c0ce3-20fa-481…	6	Export-Import Bank of China, Government Agency	China Machinery Engineering Corporation (CMEC)	Export-Import Bank of China, Government Agency; China Machinery Engineering Corporation (CMEC)	2			Checked	1	OOF-like	3	Development	1	Active	1		11964000	USD	0.837995	1	1.42769e+07	1.13667	1.62282e+07	11964000					1	Angola	540	225	Angola	AGO	AO	24
34799	China	Exim Bank Provides loan for Medium Agrarian Institute of Kwanza-Norte	2007	FALSE	In September, the Chinese EXIM Bank provided Angola with a loan to finance the completion of an agricultural school in Kwanza-Sul and another in Camuaxi locality in Kwanza-Norte (Cuanza Norte) Province (Project ID #34779) and a polytechnic school in Sumbe (Project ID #34794) with Chinese contractor CAMCO International. The contract itself was worth 37310415.50 USD. As of June 30, 2008, the loan w…	110	Education		Pipeline: Commitment	11	Loan (excluding debt rescheduling)	Angola	http://www.ashgate.com/isbn/9781409448655, Other Academic (Working Paper, Dissertation); http://www.verangola.net/Artigos/Agricultura/Instituto-Medio-Agrario-do-Kwanza-Norte-forma-450-tecnicos=001103, Media Report, including Wikileaks; http://www.portalangop.co.ao/angola/pt_pt/noticias/educacao/2013/0/3/Instituto-Medio-Agrario-dispoe-360-vagas-para-novos-alunos,3bb525ef-b4d2-4dfe-9fd2-1fe927fcc18…	10	Export-Import Bank of China, Government Agency	CAMCO International, Private Sector	Export-Import Bank of China, Government Agency; CAMCO International, Private Sector	2			Checked	1	OOF-like	3	Development	1	Active	1	https://global-factiva-com.proxy.wm.edu/redir/default.aspx?P=sa&an=AFNWS00020080423e44n0016n&cat=a&ep=ASE, Media Report, including Wikileaks	3.73104e+07	USD	0.837995	1	4.45234e+07	1.13667	5.06086e+07	3.73104e+07					1	Angola	540	225	Angola	AGO	AO	24
34030	China	Tranche B: 500 Million USD Oil-Backed Line of Credit (Linked to #31742)	2007	FALSE	In 2007, the Export-Import bank of China extended two loans whose combined valued totaled 2.5 billion USD. Angola has agreed to repay the loan by giving Sinopec access to oil blocks. According to interviews conducted by Ana Cristina Alves for an article in the Journal of Contemporary Chinese Affairs, the volume of oil being sent to China at the end of 2010 for loan repayment was 60,000 barrels a …	430	Other Multisector		Pipeline: Pledge	12	Loan (excluding debt rescheduling)	Angola	http://onlinelibrary.wiley.com/doi/10.1111/1758-5899.12138/full, Academic Journal Article; https://lup.lub.lu.se/luur/download?func=downloadFile&recordOId=1666736&fileOId=1666737, Other Academic (Working Paper, Dissertation); http://www.cmi.no/publications/file/3938-china-and-angola-strategic-partnership-or-marriage.pdf, Other Academic (Working Paper, Dissertation); http://repository.up.ac.za/bit…	6	Export-Import Bank of China, Government Agency		Export-Import Bank of China, Government Agency	1			Checked	1	OOF-like	3	Mixed (Some Development)	6	Active	1							1.13667	0						1	Angola	540	225	Angola	AGO	AO	24
34879	China	Tranche A (#31472): Purchase of Railway Transport Equipment	2007	FALSE	In September 2007, China signed a contract with Angola worth 61,970,200 USD for the purchase of railway transport equipment such as locomotives and carriages. An initial payment worth 10% of the contract was given by the Chinese EXIM Bank. As of June 30, 2008, the tender process between companies proposed by the Chinese Ministry of Commerce was underway. This project is part of the 2 billion USD …	210	Transport and Storage	Locomotives and Carriages	Pipeline: Commitment	11	Loan (excluding debt rescheduling)	Angola	http://www.ft.com/cms/s/0/19adee7a-7dce-11dc-9f47-0000779fd2ac.html, Media Report, including Wikileaks; http://www.ashgate.com/isbn/9781409448655, Other Academic (Working Paper, Dissertation)	2	Export-Import Bank of China, Government Agency		Export-Import Bank of China, Government Agency	1			Checked	1	OOF-like	3	Development	1	Active	1		61970200	USD	0.837995	1	7.39506e+07	1.13667	8.40577e+07	61970200					1	Angola	540	225	Angola	AGO	AO	24
34871	China	Tranche A (#31472): Reinforcement of Water Improvement and Supply System in Luanda City, Tranche 4 (Linked to #34849?)	2007	FALSE	In September 2007, China arranged for a project with Angola for tranche 4 of a project to reinforce the water improvement and supply system in Luanda city (See #34849). To complete this project, China EXIM bank provided a loan worth 83,278,800 USD to finance the endeavor with a 8,327,880 initial payment. As of June 30, 2008, a contract had been negotiated but no further action had occurred regard…	140	Water Supply and Sanitation		Pipeline: Commitment	11	Loan (excluding debt rescheduling)	Angola	http://www.ashgate.com/isbn/9781409448655, Other Academic (Working Paper, Dissertation)	1	Export-Import Bank of China, Government Agency		Export-Import Bank of China, Government Agency	1			Checked	1	OOF-like	3	Mixed (Some Development)	6	Active	1		83278800	USD	0.837995	1	9.93787e+07	1.13667	1.12961e+08	83278800					1	Angola	540	225	Angola	AGO	AO	24
34875	China	Tranche A (#31742): Integrated Infrastructure for Cabinda, Phase I	2007	FALSE	In September 2007, China signed a contract with Angola worth 73,031,352.80 USD to complete Phase I of an integrated infrastructure for Cabinda. An initial 7,303,135.28 USD has already been paid by the Chinese. The total project is worth 253.7 million USD. As of June 30, 2008, tender process between companies proposed by the Chinese Ministry of Commerce were underway. This project is part of the U…	210	Transport and Storage	Highway	Completion	3	Loan (excluding debt rescheduling)	Angola	http://www.ashgate.com/isbn/9781409448655, Other Academic (Working Paper, Dissertation); http://dar.dargroup.com/Projects/Integrated-Infrastructure-for-Cabinda-City, Implementing/Intermediary Agency Source	2	Export-Import Bank of China, Government Agency		Export-Import Bank of China, Government Agency	1			Checked	1	OOF-like	3	Development	1	Active	1		7.30314e+07	USD	0.837995	1	8.71501e+07	1.13667	9.90612e+07	7.30314e+07					1	Angola	540	225	Angola	AGO	AO	24
34877	China	Tranche A (#31742): Integrated Infrastructure for Malange, Phase I	2007	FALSE	In September 2007, China signed a contract with Angola worth 84,095,000 USD to complete Phase I of an integrated infrastructure for Malange. An initial 8,409,500 USD has already been paid by the Chinese. The total project is worth 237.1 million USD. As of June 30, 2008, tender process between companies proposed by the Chinese Ministry of Commerce were underway. This project is part of the USD 2 b…	210	Transport and Storage	Highway	Pipeline: Commitment	11	Loan (excluding debt rescheduling)	Angola	http://www.ashgate.com/isbn/9781409448655, Other Academic (Working Paper, Dissertation); http://www.macauhub.com.mo/en/2009/01/12/6377/, Media Report, including Wikileaks; http://dar.dargroup.com/Projects/Integrated-Infrastructure-for-Malanje-City, Implementing/Intermediary Agency Source	3	Export-Import Bank of China, Government Agency		Export-Import Bank of China, Government Agency	1			Checked	1	OOF-like	3	Mixed (Some Development)	6	Active	1		84095000	USD	0.837995	1	1.00353e+08	1.13667	1.14068e+08	84095000					1	Angola	540	225	Angola	AGO	AO	24
34876	China	Tranche A (#31742): Integrated Infrastructure for Zaire, Phase I	2007	FALSE	In September 2007, China signed a contract with Angola worth 113,151,577.50 USD to complete Phase I of an integrated infrastructure for Zaire. An initial 11,315,157.75 USD has already been paid by the Chinese. The total project is worth 400 million USD. As of June 30, 2008, tender process between companies proposed by the Chinese Ministry of Commerce were underway. This project is part of the USD…	210	Transport and Storage	Highway	Pipeline: Commitment	11	Loan (excluding debt rescheduling)	Angola	http://www.ashgate.com/isbn/9781409448655, Other Academic (Working Paper, Dissertation); http://www.portalangop.co.ao/angola/en_us/noticias/reconstrucao-nacional/2014/2/10/State-secretary-launches-2nd-phase-integrated-projects,36b0e035-1f88-49e4-8ece-1f4884a46e27.html, Media Report, including Wikileaks	2	Export-Import Bank of China, Government Agency		Export-Import Bank of China, Government Agency	1			Checked	1	OOF-like	3	Development	1	Active	1		1.13152e+08	USD	0.837995	1	1.35027e+08	1.13667	1.53481e+08	1.13152e+08					1	Angola	540	225	Angola	AGO	AO	24
34878	China	Tranche A (#31742): Purchase of 1500 Vehicles, Phase II	2007	FALSE	In September 2007, China signed a contract with Angola worth 57 million USD to for Phase II of a purchase of 1500 vehicles. An initial 5,700,000 USD has already been paid by the Chinese. As of June 30, 2008, several clauses in the commercial contract were being altered at the suggestion of the Angolan government agency GAT (Gabinete de apoio tecnico de gestï¿½o da linha de crï¿½dito da China). Th…	210	Transport and Storage	Vehicles	Pipeline: Commitment	11	Loan (excluding debt rescheduling)	Angola	http://www.macauhub.com.mo/en/2009/01/12/6377/, Media Report, including Wikileaks; http://www.ashgate.com/isbn/9781409448655, Other Academic (Working Paper, Dissertation)	2	Export-Import Bank of China, Government Agency		Export-Import Bank of China, Government Agency	1			Checked	1	OOF-like	3	Mixed (Some Development)	6	Active	1		57000000	USD	0.837995	1	6.80195e+07	1.13667	7.7316e+07	57000000					1	Angola	540	225	Angola	AGO	AO	24
34873	China	Tranche A (#31742): Rehabilitation of Caxito/Nzeto Highway	2007	FALSE	In September 2007, China signed a contract worth 477.456,579 USD with Angola to finance the rehabilitation of the Caxito/Nzeto highway. An initial payment of 47,745,657.90 USD was given. As of June 30, 2008, a contract had been negotiated but no further action had occurred regarding the project. This project is part of the USD 2 billion loan provided to Angola by China on September 28, 2007 (Proj…	210	Transport and Storage	Highway	Pipeline: Commitment	11	Loan (excluding debt rescheduling)	Angola	http://www.ashgate.com/isbn/9781409448655, Other Academic (Working Paper, Dissertation); http://allafrica.com/stories/201311200594.html, Media Report, including Wikileaks; http://allafrica.com/stories/201112300942.html, Media Report, including Wikileaks	3	Export-Import Bank of China, Government Agency		Export-Import Bank of China, Government Agency	1			Checked	1	OOF-like	3	Mixed (Some Development)	6	Active	1		477456579	USD	0.837995	1	5.69761e+08	1.13667	6.47632e+08	477456579					1	Angola	540	225	Angola	AGO	AO	24
34874	China	Tranche A (#31742): Rehabilitation of Nzeto/ Tomboco/ Mbanza Congo Highway	2007	FALSE	In September 2007, China signed a contract with Angola worth 160 million USD for the rehabilitation of the Nzeto /Tomboco/ Mbanza Congo highway. An initial payment of 16 million USD was made. As of June 30, 2008, a contract had been negotiated but no further action had occurred regarding the project. This project is part of the USD 2 billion loan provided to Angola by China on September 28, 2007 …	210	Transport and Storage	Highway	Pipeline: Commitment	11	Loan (excluding debt rescheduling)	Angola	http://www.ashgate.com/isbn/9781409448655, Other Academic (Working Paper, Dissertation)	1	Export-Import Bank of China, Government Agency		Export-Import Bank of China, Government Agency	1			Checked	1	OOF-like	3	Mixed (Some Development)	6	Active	1		160000000	USD	0.837995	1	1.90932e+08	1.13667	2.17027e+08	160000000					1	Angola	540	225	Angola	AGO	AO	24
31742	China	Tranche A: 2 Billion USD Oil-Backed Line of Credit (Linked to #34030)	2007	FALSE	In 2007, the Export-Import bank of China extended two loans whose combined valued totalled 2.5 billion USD. This involved a first and second phase of funding (ID#34030). Angola has agreed to repay the loan by giving Sinopec access to oil blocks. The first loan, totaling 2 billion USD, has a 15 year term and rate of LIBOR + 1.25. The agreement for this loan was signed for in September 2007. For th…	430	Other Multisector		Pipeline: Pledge	12	Loan (excluding debt rescheduling)	Angola	http://gga.org/stories/editions/aif-10-aid-the-bottomless-pit/chinese-take-aways/view, NGO/Civil Society/Advocacy; http://www.macauhub.com.mo/en/2011/12/12/angola-owes-us5-6-billion-of-its-loans-from-chinese-financial-institutions/, Media Report, including Wikileaks; http://journals.sub.uni-hamburg.de/giga/files/journals/3/articles/593/public/593-618-1-PB.pdf, Academic Journal Article; http://www…	11	Export-Import Bank of China, Government Agency		Export-Import Bank of China, Government Agency	1			Checked	1	OOF-like	3	Mixed (Some Development)	6	Active	1							1.13667	0			2007-09-28			1	Angola	540	225	Angola	AGO	AO	24
34749	China	Debt Cancellation of 50 Million RMB	2007	FALSE	On December 27, 2007, the Chinese government signed an agreement with the Angolan government to cancel 50 million RMB (approximately 7 million USD) of debt owed by the Angolan government to China. The Chinese Ambassador to Angola, Zhang Beisan and the Angolan Minister of Exterior Relations, Manuel Gomes dos Santos, represented their respective governments in this signing.	600	Action Relating to Debt		Completion	3	Debt forgiveness	Angola	http://repository.up.ac.za/bitstream/handle/2263/17253/Kiala_China(2010).pdf?sequence=1, Academic Journal Article; http://www.forumchinaplp.org.mo/pt/notice.php?id=885, Other Official Source (non-Donor, non-Recipient)	2							Checked	1	ODA-like	2	Development	1	Active	1		50000000	CNY	0.837995	7.60753	7.84305e+06	1.13667	8.91498e+06	6.57243e+06			2007-12-27		1	Angola	540	225	Angola	AGO	AO	24
34179	China	1st Medical Team to Angola	2007	FALSE	According to a 2011 Working Series report, in 2007, China committed to sending a medical team to Angola. The team did not arrive until 2009 because the housing accommodation was not ready. The first batch arrived on 23 June 2009 to work at the General Hospital of Luanda Province. The team comprised of 18 doctors who specialized in fields such as urology, acupuncture and cardiology. Although speci…	120	Health		Completion	3	Free-standing technical assistance	Angola	http://nai.diva-portal.org/smash/get/diva2:399727/FULLTEXT02, Other Academic (Working Paper, Dissertation); http://repository.up.ac.za/bitstream/handle/2263/17253/Kiala_China(2010).pdf?sequence=1, Academic Journal Article; http://ao.chineseembassy.org/chn/zagx/jlhz/t726075.htm, Government Source (Donor/Recipient); http://ao.chineseembassy.org/chn/zagx/jlhz/t653889.htm, Government Source (Donor/Re…	4							Checked	1	ODA-like	2	Development	1	Active	1							1.13667	0		2009-06-23				1	Angola	540	225	Angola	AGO	AO	24
35198	China	1st Donation of Anti-Malaria Medicine	2007	FALSE	On April 9, 2007, China handed over anti-malaria medicine worth 2 million RMB to Angola.	120	Health		Completion	3	Grant	Angola	http://www.thelancet.com/journals/lancet/article/PIIS0140-6736(14)60725-X/fulltext#article_upsell, Academic Journal Article; http://ao.mofcom.gov.cn/article/sqfb/200704/20070404550561.shtml, Government Source (Donor/Recipient)	2							Checked	1	ODA-like	2	Development	1	Active	1		2000000	CNY	0.837995	7.60753	313722	1.13667	356599	262897					1	Angola	540	225	Angola	AGO	AO	24
31798	China	Donation of Office Equipment to Ministry of Foreign Affairs	2007	FALSE	On Jan 11, 2007, Ambassador Beisan Zhang presented a computer, copy machine, air conditioning and other office equipment to the Foreign Ministry of Angola on behalf of the Chinese Government. Minister of Foreign Affairs Manuel Gomes dos Santos received the donation. STAFF_NOTE: The link to the source below is not working. Below is a copy of its content: ????????????? ????:????????? 2007-01-15 08:…	150	Government and Civil Society		Completion	3	Grant	Angola	http://ao.mofcom.gov.cn/article/zxhz/zzjg/200701/20070104265510.shtml, Government Source (Donor/Recipient); https://www.google.com/url?sa=t&rct=j&q=&esrc=s&source=web&cd=1&cad=rja&uact=8&ved=0CB4QFjAA&url=http%3A%2F%2Fiwaas.cass.cn%2Fdownload%2Fdownload.jsp%3Ffilepath%3D%2Fpaper%2Fuploadfiles%2F2%2FXDGG201107006.pdf%26filename%3D%25E4%25B8%25AD%25E5%259B%25BD%25E4%25B8%258E%25E5%25AE%2589%25E5%25…	2							Checked	1	ODA-like	2	Development	1	Active	1							1.13667	0				2007-01-11		1	Angola	540	225	Angola	AGO	AO	24
34794	China	Phase 1: Construction of Technical Institute in Sumbe (linked to project ID#991 and ID#11612)	2006	FALSE	On 15 June, 2006 a contract was signed between China and Angola for the construction of a technical institute in Sumbe. The contractor was CAMCO and the value of the contract was 9,360,700.98 USD. The contract began 15 June, 2006 and the projected handover date was 31 July, 2007. The initial payment for this project was 963,070.10 USD and as of December 2007 the amount financed by China was 8,667…	110	Education		Completion	3	Loan (excluding debt rescheduling)	Angola	http://www.ashgate.com/isbn/9781409448655, Other Academic (Working Paper, Dissertation); http://wenr.wes.org/2008/02/wenr-february-2008-africa/, Media Report, including Wikileaks; http://www.minfin.gv.ao/fsys/Relatorio_de_Actividades_do_II_trimestre_2007_3.pdf, Government Source (Donor/Recipient); http://www.minfin.gv.ao/fsys/China_Projectos_concluidos%20_2008.pdf, Government Source (Donor/Recipi…	5	Export-Import Bank of China, Government Agency	CAMCO International, Private Sector	Export-Import Bank of China, Government Agency; CAMCO International, Private Sector	2			Checked	1	OOF-like	3	Mixed (Some Development)	6	Active	1		9.6307e+06	USD	0.743052	1	1.2961e+07	1.13667	1.47324e+07	9.6307e+06	2006-06-15			2007-07-31	1	Angola	540	225	Angola	AGO	AO	24
34919	China	Phase 2 (#11612): New Generation Network (NGN) and Communications Installations for Bie, Huambo, Huila, Luanda	2006	FALSE	On Feb 13, 2006 the Chinese company China Machinery Engineering Company and Angola signed a contract for the construction of a new generation network (NGN) for Huambo, Bie, Huila, and Luanda. The contract value for the project USD 75,275,357.00, and the project was handed over Feb 8, 2009. Communications installations include optic fibre cabling, IP, VSAT, and intelligence networks. It is the thi…	430	Other Multisector	Energy, Communications	Completion	3	Loan (excluding debt rescheduling)	Angola	http://www.ashgate.com/isbn/9781409448655, Other Academic (Working Paper, Dissertation); http://www.minfin.gv.ao/fsys/China-Relatorio_do_II_trim_2008SitedoMINFIN2.pdf, Government Source (Donor/Recipient); http://www.sinomach.com.cn/templates/T_news_en/content.aspx?nodeid=605&page=ContentPage&contentid=6607#returnTop, Other Official Source (non-Donor, non-Recipient); http://www.portalangop.co.ao/a…	5	Export-Import Bank of China, Government Agency	China Machinery Engineering Corporation (CMEC)	Export-Import Bank of China, Government Agency; China Machinery Engineering Corporation (CMEC)	2			Checked	1	OOF-like	3	Mixed (Some Development)	6	Active	1		75275357	USD	0.743052	1	1.01306e+08	1.13667	1.15151e+08	75275357	2006-12-08	2006-10-24	2009-02-08		1	Angola	540	225	Angola	AGO	AO	24
34917	China	Phase 2 (#11612): New Generation Network for Bengo, Bie, Kwanza, Luanda, Malange, Moxico	2006	FALSE	Feb 13, 2006, the Chinese company China Machinery Engineering Corporation and Angola signed a contract for the construction of a new generation network for Bengo, Bie, Kwanza-Norte, Kwanza-Sul, Luanda, Malange, and Moxico. The contract value for this project was USD 74,331,285.00, and the project was completed April 8, 2009. It is the first project of four, under the Angola Next Generation Networ…	230	Energy Generation and Supply		Completion	3	Loan (excluding debt rescheduling)	Angola	http://www.minfin.gv.ao/fsys/China-Relatorio_do_II_trim_2008SitedoMINFIN2.pdf, Government Source (Donor/Recipient); http://www.ashgate.com/isbn/9781409448655, Other Academic (Working Paper, Dissertation); http://pg.jrj.com.cn/acc/Res/HK_RES/STOCK/2014/2/14/df23ee48-5592-47b4-85c2-b2e1b5b9c32e.pdf, Other Academic (Working Paper, Dissertation); http://www.portalangop.co.ao/angola/en_us/noticias/eco…	5	Export-Import Bank of China, Government Agency; China Machinery Engineering Corporation (CMEC)		Export-Import Bank of China, Government Agency; China Machinery Engineering Corporation (CMEC)	2			Checked	1	OOF-like	3	Mixed (Some Development)	6	Active	1		74331285	USD	0.743052	1	1.00035e+08	1.13667	1.13707e+08	74331285		2006-10-24	2009-04-08		1	Angola	540	225	Angola	AGO	AO	24
34918	China	Phase 2 (#11612): New Generation Network for Benguela, Kwanza, Cunene, Huambo, Uige and Zaire	2006	FALSE	Feb 13, 2006, the Chinese company China Machinery Engineering Company and Angola signed a contract for the construction of a new generation network for Benguela, Kwanza Norte, Cunene, Huambo, Uige, and Zaire. The contract value for the project USD 67,954,756.00, and the project was handed over March 8, 2009. This is the second project of four subprojects in the Angola Next Generation Project, imp…	230	Energy Generation and Supply		Completion	3	Loan (excluding debt rescheduling)	Angola	http://www.ashgate.com/isbn/9781409448655, Other Academic (Working Paper, Dissertation); http://www.minfin.gv.ao/fsys/China-Relatorio_do_II_trim_2008SitedoMINFIN2.pdf, Government Source (Donor/Recipient); http://www.portalangop.co.ao/angola/en_us/noticias/economia/2006/5/22/Govt-Approves-Supply-Contract-With-Angola-Telecom,668dfd0a-6aae-465f-ac83-c04626ef0794.html, Media Report, including Wikilea…	5	Export-Import Bank of China, Government Agency	China Machinery Engineering Corporation (CMEC)	Export-Import Bank of China, Government Agency; China Machinery Engineering Corporation (CMEC)	2			Checked	1	OOF-like	3	Mixed (Some Development)	6	Active	1		67954756	USD	0.743052	1	9.14535e+07	1.13667	1.03953e+08	67954756		2006-10-21	2009-03-08		1	Angola	540	225	Angola	AGO	AO	24
34920	China	Phase 2 (#11612): New Generation Network for Bie, Huambo, Huila, Luanda	2006	FALSE	In February, 2006, China Exim Bank provided a loan for the construction of a new generation network for Bie, Huambo, Huila, and Luanda. The contract value for the project USD 58,745,791.00, and the project was handed over Feb 8, 2009. This is the fourth project of four subprojects of the Angola Next Generation Project, implemented by CMEC. This project is part of Phase 2 of the 2 billion USD loan…	230	Energy Generation and Supply		Completion	3	Loan (excluding debt rescheduling)	Angola	http://www.ashgate.com/isbn/9781409448655, Other Academic (Working Paper, Dissertation); http://www.ashgate.com/isbn/9781409448655, Other Academic (Working Paper, Dissertation); http://opendocs.ids.ac.uk/opendocs/bitstream/handle/123456789/1695/AFRODAD-%20322481.pdf?sequence=1, NGO/Civil Society/Advocacy; http://www.cmi.no/file/?779, Other Academic (Working Paper, Dissertation); http://pg.jrj.com…	7	Export-Import Bank of China, Government Agency	China Machinery Engineering Corporation, State-Owned Company	China Machinery Engineering Corporation, State-Owned Company; Export-Import Bank of China, Government Agency	2			Checked	1	OOF-like	3	Mixed (Some Development)	6	Active	1		5.87458e+06	USD	0.743052	1	7.90601e+06	1.13667	8.98655e+06	5.87458e+06		2006-10-24	2009-02-08		1	Angola	540	225	Angola	AGO	AO	24
34887	China	Phase 2 (#11612): Provision of 25 Fishing Boats and 1000 Canoes	2006	FALSE	In Jan 2006, the China Machinery Engineering Corporation signed a contract with Angola for the provision of 25 30-meter fishing boats and 1000 4.15-meter canoes for Angola's fishing industry. The boats were handed over July 11, 2009. This project is part of Phase 2 of the 2 billion USD loan to Angola in 2004. Please refer to the appendix in 'Uncovering African Agency' by Lucy Corkin for further i…	310	Agriculture, Forestry and Fishing		Completion	3	Loan (excluding debt rescheduling)	Angola	http://www.minfin.gv.ao/fsys/China-Relatorio_do_II_trim_2008SitedoMINFIN2.pdf, Government Source (Donor/Recipient); http://www.ashgate.com/isbn/9781409448655, Other Academic (Working Paper, Dissertation)	2	Export-Import Bank of China, Government Agency	China Machinery Engineering Corporation (CMEC)	Export-Import Bank of China, Government Agency; China Machinery Engineering Corporation (CMEC)	2			Checked	1	OOF-like	3	Mixed (Some Development)	6	Active	1		98119525	USD	0.743052	1	1.32049e+08	1.13667	150096944	98119525		2006-06-20		2009-07-11	1	Angola	540	225	Angola	AGO	AO	24
34890	China	Phase 2 (#11612): Provision of Fishing Vessels, Speedboat, and Other Fishing Equipment	2006	FALSE	In Jan 2006, the China Machinery Engineering Corporation signed a contract with Angola for the provision of ten 33.56-meter fishing boats, one 49-meter speedboat, one 89.96-meter naval launch base, five 29.7-meter fiberglass patrol vessels, one 34-meter tugboat for Angola's fishing industry. The boats were handed over July 11, 2009. The contract value for the project is USD 70,880,779.00. This pr…	310	Agriculture, Forestry and Fishing		Completion	3	Loan (excluding debt rescheduling)	Angola	http://www.minfin.gv.ao/fsys/China-Relatorio_do_II_trim_2008SitedoMINFIN2.pdf, Government Source (Donor/Recipient); http://www.ashgate.com/isbn/9781409448655, Other Academic (Working Paper, Dissertation)	2	Export-Import Bank of China, Government Agency	China Machinery Engineering Corporation (CMEC)	Export-Import Bank of China, Government Agency; China Machinery Engineering Corporation (CMEC)	2			Checked	1	OOF-like	3	Mixed (Some Development)	6	Active	1		70880779	USD	0.743052	1	9.53914e+07	1.13667	1.08429e+08	70880779		2006-06-20		2009-07-11	1	Angola	540	225	Angola	AGO	AO	24
34888	China	Phase 2 (#11612): Provision of Patrol Boats, Fishing Boats, Canoes	2006	FALSE	In Jan 2006, the China Machinery Engineering Corporation signed a contract with Angola for the provision of five 46.9-meter fishing boats, ten 46.9-meter shrimping boats, and 2000 canoes for Angola's fishing industry. The boats were handed over July 11, 2009. This project is part of Phase 2 of the 2 billion USD loan to Angola in 2004. Please refer to the appendix in 'Uncovering African Agency' by…	310	Agriculture, Forestry and Fishing		Completion	3	Loan (excluding debt rescheduling)	Angola	http://www.minfin.gv.ao/fsys/China-Relatorio_do_II_trim_2008SitedoMINFIN2.pdf, Government Source (Donor/Recipient); http://www.ashgate.com/isbn/9781409448655, Other Academic (Working Paper, Dissertation)	2	Export-Import Bank of China, Government Agency	China Machinery Engineering Corporation (CMEC)	Export-Import Bank of China, Government Agency; China Machinery Engineering Corporation (CMEC)	2			Checked	1	OOF-like	3	Mixed (Some Development)	6	Active	1		97847205	USD	0.743052	1	1.31683e+08	1.13667	1.4968e+08	97847205		2006-06-20		2009-07-11	1	Angola	540	225	Angola	AGO	AO	24
34921	China	Phase 2 (#11612): Rehabilitation and Expansion of MT/BT Networks in Luanda	2006	TRUE	A Chinese company contracted to rehabilitate and expand the MT/BT networks in the capital city of Angola, Luanda. The contact value for this project was USD 28,486,325.47. Additional information unclear at this time. This project is part of Phase 2 of the 2 billion USD loan to Angola in 2004. Please refer to the appendix in 'Uncovering African Agency' by Lucy Corkin for further information.	230	Energy Generation and Supply		Implementation	2	Loan (excluding debt rescheduling)	Angola	http://www.minfin.gv.ao/fsys/China-Relatorio_do_II_trim_2008SitedoMINFIN2.pdf, Government Source (Donor/Recipient); http://www.ashgate.com/isbn/9781409448655, Other Academic (Working Paper, Dissertation)	2	Export-Import Bank of China, Government Agency		Export-Import Bank of China, Government Agency	1			Checked	1	OOF-like	3	Mixed (Some Development)	6	Active	1		2.84863e+07	USD	0.743052	1	3.83369e+07	1.13667	4.35766e+07	2.84863e+07					1	Angola	540	225	Angola	AGO	AO	24
34924	China	Phase 2 (#11612): Rehabilitation and Expansion of MT/BT Networks in Luanda-Sul, Luanda-Norte, Dundo, Saurimo	2006	TRUE	A Chinese company contracted to rehabilitate and expand the MT/BT networks in Luanda-Sul, Luanda-Norte, Dundo, and Saurimo in Angola. The contact value for this project was USD 50,697,236.00. Further details on this project are unknown at the time of entry. This project is part of Phase 2 of the 2 billion USD loan to Angola in 2004. Please refer to the appendix in 'Uncovering African Agency' by L…	230	Energy Generation and Supply		Implementation	2	Loan (excluding debt rescheduling)	Angola	http://www.ashgate.com/isbn/9781409448655, Other Academic (Working Paper, Dissertation); http://www.minfin.gv.ao/fsys/China-Relatorio_do_II_trim_2008SitedoMINFIN2.pdf, Government Source (Donor/Recipient)	2	Export-Import Bank of China, Government Agency		Export-Import Bank of China, Government Agency	1			Checked	1	OOF-like	3	Mixed (Some Development)	6	Active	1		50697236	USD	0.743052	1	6.82284e+07	1.13667	7.75534e+07	50697236					1	Angola	540	225	Angola	AGO	AO	24
34923	China	Phase 2 (#11612): Rehabilitation and Expansion of MT/BT Networks in Malange	2006	TRUE	A Chinese company contracted to rehabilitate and expand the MT/BT networks in Malange, Angola. The contact value for this project was USD 29,851,345.18. This project concluded in 2010, according to the Angolan electricity company Empresa Nacional de Electricidade. This project is part of Phase 2 of the 2 billion USD loan to Angola in 2004. Please refer to the appendix in 'Uncovering African Agenc…	230	Energy Generation and Supply		Implementation	2	Loan (excluding debt rescheduling)	Angola	http://www.minfin.gv.ao/fsys/China-Relatorio_do_II_trim_2008SitedoMINFIN2.pdf, Government Source (Donor/Recipient); http://www.ashgate.com/isbn/9781409448655, Other Academic (Working Paper, Dissertation); http://www.minerg.gv.ao/projectos/ene.html?download=83:projectos%20em%20de%20execuo, Government Source (Donor/Recipient)	3	Export-Import Bank of China, Government Agency		Export-Import Bank of China, Government Agency	1			Checked	1	OOF-like	3	Mixed (Some Development)	6	Active	1		2.98513e+07	USD	0.743052	1	4.0174e+07	1.13667	4.56647e+07	2.98513e+07			2010-01-01		1	Angola	540	225	Angola	AGO	AO	24
34925	China	Phase 2 (#11612): Rehabilitation and Reinforcing of Water Systems in Luanda-Sul, Luanda-Norte, Dundo, Saurimo	2006	TRUE	A Chinese company contracted to rehabilitate and reinforce the water system in Luanda-Sul, Luanda-Norte, Dundo, Saurimo in Angola. The contract value for this project was USD 35,796,967.36. Further details on this project are unknown at time of entry. This project is part of Phase 2 of the 2 billion USD loan to Angola in 2004. Please refer to the appendix in 'Uncovering African Agency' by Lucy Co…	140	Water Supply and Sanitation		Implementation	2	Loan (excluding debt rescheduling)	Angola	http://www.minfin.gv.ao/fsys/China-Relatorio_do_II_trim_2008SitedoMINFIN2.pdf, Government Source (Donor/Recipient); http://www.ashgate.com/isbn/9781409448655, Other Academic (Working Paper, Dissertation)	2	Export-Import Bank of China, Government Agency		Export-Import Bank of China, Government Agency	1			Checked	1	OOF-like	3	Mixed (Some Development)	6	Active	1		3.5797e+07	USD	0.743052	1	4.81756e+07	1.13667	5.47599e+07	3.5797e+07					1	Angola	540	225	Angola	AGO	AO	24
34883	China	Phase 2 - Construction of secondary school, technical institutes and administrative centers in Luanda, Uige and Moxico (Linked to Project ID #11612)	2006	FALSE	On Sep 27, 2006, the Chinese company Sinohydro and Angola signed a contract for the construction and equipping of three technical institutes in Luanda-Sul, Luanda-Norte and Uige (in Bairro Kandande); one high school agricultural institute in Uige; two administration and management institutes in Uige (Uige & Bairro Quituma) and Moxico; and one secondary school in Uige (Bairro Benvindo). The contra…	110	Education		Implementation	2	Loan (excluding debt rescheduling)	Angola	http://www.minfin.gv.ao/docs/dspEducacao.htm, Government Source (Donor/Recipient); http://www.minfin.gv.ao/fsys/China_Projectos_concluidos%20_2008.pdf, Government Source (Donor/Recipient); http://www.macauhub.com.mo/en/2008/02/18/4555/, Media Report, including Wikileaks	3	Export-Import Bank of China, Government Agency	SinoHydro , State-Owned Company	Export-Import Bank of China, Government Agency; SinoHydro , State-Owned Company	2			Checked	1	OOF-like	3	Mixed (Some Development)	6	Active	1		6.73131e+07	USD	0.743052	1	9.05901e+07	1.13667	1.02971e+08	6.73131e+07		2007-08-15			1	Angola	540	225	Angola	AGO	AO	24
34881	China	Phase 2 - Construction of secondary schools, technical institutes and administrative centers in Luanda, Bengo, Benguela, Namibe & Cabinda (Linked to Project ID #11612)	2006	FALSE	On Sep 27, 2006, the Chinese company Sinomach and Angola signed a contract for the construction and equipping of four technical institutes in Luanda (Nova Vida), Bengo, Cabinda and Namibe; five administrative and management institutes in Luanda (2; Nova Vida and Zango), Benguela (1; Catumbela), Zaire (1; Mï¿½banza Kongo) and Namibe (1; Namibe); six secondary schools, two each in Luanda (Panguila …	110	Education		Implementation	2	Loan (excluding debt rescheduling)	Angola	http://www.ashgate.com/isbn/9781409448655, Other Academic (Working Paper, Dissertation); http://www.minfin.gv.ao/docs/dspEducacao.htm, Government Source (Donor/Recipient); http://repository.up.ac.za/bitstream/handle/2263/17253/Kiala_China(2010).pdf?sequence=1, Academic Journal Article; http://www.minfin.gv.ao/fsys/China_Projectos_concluidos%20_2008.pdf, Government Source (Donor/Recipient)	4	Export-Import Bank of China, Government Agency	SINOMACH - China National Machinery Industry Corporation Ltd. (????????????), State-Owned Company	Export-Import Bank of China, Government Agency; SINOMACH - China National Machinery Industry Corporation Ltd. (????????????), State-Owned Company	2			Checked	1	OOF-like	3	Mixed (Some Development)	6	Active	1		9.32324e+07	USD	0.743052	1	1.25472e+08	1.13667	1.42621e+08	9.32324e+07		2007-07-17			1	Angola	540	225	Angola	AGO	AO	24
31799	China	Monetary Donation for Cholera Prevention	2006	FALSE	On June 14, 2006, Chinese Ambassador to Angola Zhang Beisan presented a check worth 200,000 USD to the Minister of Health Sebastiao Sapuile Veloso to support Angolan efforts to prevent cholera.	120	Health		Completion	3	Grant	Angola	http://ao.mofcom.gov.cn/article/sqfb/200606/20060602527847.shtml, Government Source (Donor/Recipient)	1	Chinese Government		Chinese Government	1			Checked	1	ODA-like	2	Development	1	Active	1		200000	USD	0.743052	1	269160	1.13667	305947	200000			2006-06-14		1	Angola	540	225	Angola	AGO	AO	24
32853	China	Angola Anti-Malaria Center	2006	FALSE	Pursuant to promises made during the 2006 FOCAC summit, China helped to establish an anti-malaria center in Angola. The embassy held an unveiling ceremony for the center on October 23, 2009, marking the beginning of its operations. According to a 2011 Working Series report, after the establishment of the anti-malaria center at the General Hospital of Luanda, Chinese experts could set up and test …	120	Health		Completion	3	Grant	Angola	http://jjhzj.mofcom.gov.cn/article/y/200911/20091106599888.shtml, Government Source (Donor/Recipient); http://jjhzj.mofcom.gov.cn/article/y/200909/20090906530853.shtml, Government Source (Donor/Recipient); http://repository.up.ac.za/bitstream/handle/2263/17253/Kiala_China(2010).pdf?sequence=1, Academic Journal Article; http://nai.diva-portal.org/smash/get/diva2:399727/FULLTEXT02, Other Academic (…	5							Checked	1	ODA-like	2	Development	1	Active	1							1.13667	0				2009-10-23		1	Angola	540	225	Angola	AGO	AO	24
34776	China	Phase 1: Construction and Equipping of Four Technical Schools in Luanda, Two in Benguela (linked to project ID#991 and ID#11612)	2005	FALSE	On 10 March, 2005 a contract was signed between China and Angola for the construction and equipping of four technical schools in Luanda (Sambizanga, Cacuaco, Cazenga and Viana localities) and two technical schools in Benguela (Bairro de Marco in Lobito city and in Graï¿½a city). The contractor was China Machinery Engineering Corporation and the value of the contract was 58,938,709.20 USD. The con…	110	Education		Completion	3	Loan (excluding debt rescheduling)	Angola	http://www.ashgate.com/isbn/9781409448655, Other Academic (Working Paper, Dissertation); http://www.macauhub.com.mo/en/2008/02/18/4555/, Media Report, including Wikileaks; http://www.minfin.gv.ao/fsys/China_Projectos_concluidos%20_2008.pdf, Government Source (Donor/Recipient)	3	Export-Import Bank of China, Government Agency	China Machinery Engineering Corporation (CMEC)	China Machinery Engineering Corporation (CMEC) ; Export-Import Bank of China, Government Agency	2			Checked	1	OOF-like	3	Mixed (Some Development)	6	Active	1		5.89387e+07	USD	0.696651	1	8.46029e+07	1.13667	9.61659e+07	5.89387e+07			2008-07-01	2007-05-22	1	Angola	540	225	Angola	AGO	AO	24
34845	China	Phase 1: Construction and Equipping of Health Center in Huambo (linked to project ID#991 and ID#11612)	2005	FALSE	On 24 October, 2005 a contract was signed between China and Angola for the construction and equipping of a health center in Huambo Province, located in Bairro de Sao Pedro, Kasseque II municipality. The contractor was SinoHydro and the value of the contract was 4,003,477.00 USD. The contract began on 1 August, 2006 and the projected handover date for the project was 1 August, 2007. The initial pa…	120	Health		Completion	3	Loan (excluding debt rescheduling)	Angola	http://www.ashgate.com/isbn/9781409448655, Other Academic (Working Paper, Dissertation); http://www.csdsj.com/zwlm/gcgl/hwgc/13275.htm, Implementing/Intermediary Agency Source; http://lib.cnki.net/cyfd/N2010090480000751.html, Implementing/Intermediary Agency Source; http://www.minfin.gv.ao/fsys/China_Projectos_concluidos%20_2008.pdf, Government Source (Donor/Recipient)	4	Export-Import Bank of China, Government Agency	SinoHydro , State-Owned Company	Export-Import Bank of China, Government Agency; SinoHydro , State-Owned Company	2			Checked	1	OOF-like	3	Mixed (Some Development)	6	Active	1		4003477	USD	0.696651	1	5.74675e+06	1.13667	6.53217e+06	4003477	2006-08-01		2007-08-01		1	Angola	540	225	Angola	AGO	AO	24
34843	China	Phase 1: Construction and Equipping of Regional Hospital in Lubango (linked to project ID#991 and ID#11612)	2005	FALSE	On 24 October, 2005 a contract was signed between China and Angola for construction and equipping of a regional hospital in Lubango city, Huï¿½la province. The contractor was SinoHydro and the value of the contract was 48,060,432.43 USD. The contract began on 10 July, 2006 and the projected handover date for the project was 10 January, 2008. The initial payment for this project was 4,806,043.24 U…	120	Health		Completion	3	Loan (excluding debt rescheduling)	Angola	http://www.ashgate.com/isbn/9781409448655, Other Academic (Working Paper, Dissertation); http://www.sasac.gov.cn/n1180/n1226/n2410/n314289/6621258.html, Government Source (Donor/Recipient); http://www.gov.cn/ztzl/2008-09/16/content_1096278.htm, Government Source (Donor/Recipient)	3		SinoHydro , State-Owned Company					Checked	1	OOF-like	3	Mixed (Some Development)	6	Active	1		4.80604e+07	USD	0.696651	1	6.89878e+07	1.13667	7.84166e+07	4.80604e+07	2006-05-17		2008-06-30	2008-01-10	1	Angola	540	225	Angola	AGO	AO	24
34842	China	Phase 1: Construction and Equipping of Regional Hospital in Namibe (linked to project ID#991 and ID#11612)	2005	FALSE	On 24 October, 2005 a contract was signed between China and Angola for the construction and equipping of a regional hospital in Namibe. The contractor was SinoHydro and the value of the contract was 9,263,864.00 USD. The contract began on 1 November, 2006 and the projected handover date for the project was 10 January, 2008. The initial payment for this project was 926,386.40 USD and the amount fi…	120	Health		Completion	3	Loan (excluding debt rescheduling)	Angola	http://www.ashgate.com/isbn/9781409448655, Other Academic (Working Paper, Dissertation); http://www.csdsj.com/zwlm/gcgl/hwgc/13278.htm, Implementing/Intermediary Agency Source; http://www.csdsj.com/zwlm/xwzx/zgxw/591.htm, Implementing/Intermediary Agency Source; http://www.minfin.gv.ao/fsys/China_Projectos_concluidos%20_2008.pdf, Government Source (Donor/Recipient)	4	Export-Import Bank of China, Government Agency	SinoHydro , State-Owned Company	Export-Import Bank of China, Government Agency; SinoHydro , State-Owned Company	2			Checked	1	OOF-like	3	Mixed (Some Development)	6	Active	1		9263864	USD	0.696651	1	1.32977e+07	1.13667	1.51152e+07	9263864	2006-04-18		2008-02-01	2007-07-18	1	Angola	540	225	Angola	AGO	AO	24
34852	China	Phase 1: Construction and Equipping of TPA Production Center in Camama (linked to project ID#991 and ID#11612)	2005	FALSE	In March, 2005 a contract was signed between China and Angola for the construction and equipping of TPA (Televisao Publica de Angola, an Angolan state-owned television station) production center in Camama, located in Kilamba-Kiaxi, Luanda Province. The contractor was CEIEC and the value of the contract was 66,905,200.00 USD. The contract began on 18 November, 2005 and the projected handover date …	220	Communications		Completion	3	Loan (excluding debt rescheduling)	Angola	http://www.ashgate.com/isbn/9781409448655, Other Academic (Working Paper, Dissertation); http://www.ceiec.com.cn/documentation/428, Implementing/Intermediary Agency Source; http://www.govec-angola.com/htm/20137/11_698.htm, Implementing/Intermediary Agency Source; http://www.mouldintl.com/news/308090410160721923.html, Media Report, including Wikileaks; http://www.angonoticias.com/Artigos/item/1808…	7	Export-Import Bank of China, Government Agency	China National Electric Import & Export Corporation, State-Owned Company	Export-Import Bank of China, Government Agency; China National Electric Import & Export Corporation, State-Owned Company	2			Checked	1	OOF-like	3	Mixed (Some Development)	6	Active	1		66905200	USD	0.696651	1	9.60383e+07	1.13667	1.09164e+08	66905200	2006-04-06		2008-09-02		1	Angola	540	225	Angola	AGO	AO	24
34841	China	Phase 1: Construction and Equipping of Three Health Centers in Malange (linked to project ID#991 and ID#11612)	2005	FALSE	On 9 May, 2005 a contract was signed between China and Angola for the construction and equipping of three health centers in Malange (Cangandala, Carreira de Tiros, and originally Caculama). The contractor was SinoHydro and the value of the contract was 12,101,431.00 USD. The two sections of the contract began on 1 August and 10 August, 2006 and the projected handover dates were 10 August and 1 No…	120	Health		Completion	3	Loan (excluding debt rescheduling)	Angola	http://www.ashgate.com/isbn/9781409448655, Other Academic (Working Paper, Dissertation); http://www.qhei.gov.cn/qyycp/qyzs/dzkcyslgl/t20051212_186214.shtml, Media Report, including Wikileaks; http://www.minfin.gv.ao/fsys/China_Projectos_concluidos%20_2008.pdf, Government Source (Donor/Recipient)	3	Export-Import Bank of China, Government Agency	SinoHydro , State-Owned Company	Export-Import Bank of China, Government Agency; SinoHydro , State-Owned Company	2			Checked	1	OOF-like	3	Mixed (Some Development)	6	Active	1		12010431	USD	0.696651	1	1.72402e+07	1.13667	1.95965e+07	12010431	2006-08-01		2007-08-10		1	Angola	540	225	Angola	AGO	AO	24
34775	China	Phase 1: Construction and Equipping of Three Secondary Schools in Luanda, one in Benguela (linked to project ID#991 and ID#11612)	2005	FALSE	On 10 March, 2005 a contract was signed between China and Angola for the construction and equipping of three secondary schools in Luanda (Viana [Sapï¿½], Cacuaco and Nova Vida localities) and one secondary school in Benguela (Massangarala locality). The contractor was China Machinery Engineering Corporation and the value of the contract was 17,959,601.79 USD. The contract began 20 March, 2006 and…	110	Education		Completion	3	Loan (excluding debt rescheduling)	Angola	http://www.ashgate.com/isbn/9781409448655, Other Academic (Working Paper, Dissertation); http://www.macauhub.com.mo/en/2008/02/18/4555/, Media Report, including Wikileaks	2	Export-Import Bank of China, Government Agency	China Machinery Engineering Corporation (CMEC)	Export-Import Bank of China, Government Agency; China Machinery Engineering Corporation (CMEC)	2			Checked	1	OOF-like	3	Mixed (Some Development)	6	Active	1		1.79596e+07	USD	0.696651	1	2.57799e+07	1.13667	2.93033e+07	1.79596e+07	2006-03-20			2007-07-12	1	Angola	540	225	Angola	AGO	AO	24
34779	China	Phase 1: Construction and Equipping of Two Agricultural Schools in Kwanza-Sul and Kwanza-Norte (linked to project ID#991 and ID#11612)	2005	FALSE	On 9 March, 2005 a contract was signed between China and Angola for the construction and equipping of two agricultural schools in Kwanza-Sul and Kwanza-Norte. The contractor was CAMCO and the value of the contract was 45,825,306.72 USD. The contract began on 15 June, 2006 and the projected handover date was 15 September, 2007. The initial payment for this project was 4,582,530.67 USD and the amou…	110	Education		Implementation	2	Loan (excluding debt rescheduling)	Angola	http://www.ashgate.com/isbn/9781409448655, Other Academic (Working Paper, Dissertation); http://www.verangola.net/Artigos/Agricultura/Instituto-Medio-Agrario-do-Kwanza-Norte-forma-450-tecnicos=001103, Media Report, including Wikileaks; http://www.portalangop.co.ao/angola/pt_pt/noticias/educacao/2013/0/3/Instituto-Medio-Agrario-dispoe-360-vagas-para-novos-alunos,3bb525ef-b4d2-4dfe-9fd2-1fe927fcc18…	9	Export-Import Bank of China, Government Agency	CAMCO International, Private Sector	Export-Import Bank of China, Government Agency; CAMCO International, Private Sector	2			Checked	1	OOF-like	3	Mixed (Some Development)	6	Active	1	https://global-factiva-com.proxy.wm.edu/redir/default.aspx?P=sa&an=AFNWS00020080423e44n0016n&cat=a&ep=ASE, Media Report, including Wikileaks	4.58253e+07	USD	0.696651	1	6.57794e+07	1.13667	7.47697e+07	4.58253e+07	2006-06-15			2007-09-15	1	Angola	540	225	Angola	AGO	AO	24
34783	China	Phase 1: Construction and Equipping of Two Health Centers in Kwanza-Norte (linked to project ID#991 and ID#11612)	2005	FALSE	On 29 October, 2005 a contract was signed between China and Angola for the construction and equipping of two health centers in Kwanza-Norte. The contractor was CAMCO and the value of the contract was 8,006,954.00 USD. The two parts of the contract began on 10 March and 25 March, 2006 and the two projected handover dates were 25 September (for Dondo city) and 10 October, 2007 (for Ndalatando city)…	120	Health		Completion	3	Loan (excluding debt rescheduling)	Angola	http://www.ashgate.com/isbn/9781409448655, Other Academic (Working Paper, Dissertation); http://www.portalangop.co.ao/angola/pt_pt/noticias/saude/2010/3/14/Inauguracao-Centro-Saude-agrada-habitantes-Dondo,a24796a8-3aa7-4681-9907-ba85e438e398.html, Media Report, including Wikileaks; http://www.angolabelazebelo.com/category/provincia-do-kwanza-norte/, Social Media, including Unofficial Blogs; http:…	4	Export-Import Bank of China, Government Agency	CAMCO International, Private Sector	Export-Import Bank of China, Government Agency; CAMCO International, Private Sector	2			Checked	1	OOF-like	3	Mixed (Some Development)	6	Active	1		8006954	USD	0.696651	1	1.14935e+07	1.13667	1.30643e+07	8006954		2006-03-10		2007-10-10	1	Angola	540	225	Angola	AGO	AO	24
34846	China	Phase 1: Construction and Equipping of Two Municipal Hospitals in Kwanza-Norte and Kwanza-Sul (linked to project ID#991 and ID#11612)	2005	FALSE	On 29 October, 2005 a contract was signed between China and Angola for the construction and equipping of two municipal hospitals in Cazengo, Kwanza-Norte Province and Sumbe, Kwanza-Sul Province. The contractor was CAMCO and the value of the contract was 18,527,728.00 USD. The sections of the contract began on 17 November and 1 November, 2006 and the projected handover dates for the project were 1…	120	Health		Completion	3	Loan (excluding debt rescheduling)	Angola	http://www.ashgate.com/isbn/9781409448655, Other Academic (Working Paper, Dissertation); http://www.angolabelazebelo.com/category/provincia-do-kwanza-norte/, Social Media, including Unofficial Blogs; http://www.minfin.gv.ao/fsys/China_Projectos_concluidos%20_2008.pdf, Government Source (Donor/Recipient)	3	Export-Import Bank of China, Government Agency	CAMCO International, Private Sector	Export-Import Bank of China, Government Agency; CAMCO International, Private Sector	2			Checked	1	OOF-like	3	Mixed (Some Development)	6	Active	1		18527728	USD	0.696651	1	2.65954e+07	1.13667	3.02303e+07	18527728	2006-11-01		2008-02-17	2008-02-17	1	Angola	540	225	Angola	AGO	AO	24
34774	China	Phase 1: Construction of Agricultural School in Malange (See #34797) (linked to project ID#991 and ID#11612)	2005	FALSE	On 10 March, 2005 a contract was signed between China and Angola for the rehabilitation of an agricultural school in Kï¿½ssua (Quï¿½ssua) locality in Malange (Malanje) Province, known as the Malanje Medium Agrarian Institute (IMAM). The contractor was China Machinery Engineering Corporation and as of 2007 two different amounts were reported as to the value of the contract: 19,950,351.06 USD or 16…	110	Education		Completion	3	Loan (excluding debt rescheduling)	Angola	http://www.ashgate.com/isbn/9781409448655, Other Academic (Working Paper, Dissertation); http://panafricannews.blogspot.com/2007/02/angola-government-official-happy-with.html, Media Report, including Wikileaks; http://www.portalangop.co.ao/angola/en_us/noticias/politica/2007/5/23/Head-State-Inaugurates-Malanje-Medium-Agrarian-Institute,593c0ce3-20fa-4812-b4f4-8be1bcbff8e6.html, Media Report, incl…	6	Export-Import Bank of China, Government Agency	China Machinery Engineering Corporation (CMEC)	Export-Import Bank of China, Government Agency; China Machinery Engineering Corporation (CMEC)	2			Checked	1	OOF-like	3	Mixed (Some Development)	6	Active	1		1.69504e+07	USD	0.696651	1	2.43312e+07	1.13667	2.76566e+07	1.69504e+07	2006-03-09	2005-03-10		2007-03-20	1	Angola	540	225	Angola	AGO	AO	24
34848	China	Phase 1: Construction of LT 220 Kv in Capanda, Lucala and Ndalatando (linked to project ID#991 and ID#11612)	2005	FALSE	On 10 March, 2005 a contract was signed between China and Angola for the construction of LT 220 Kv in Capanda, Lucala and Ndalatando. The contractor was CMEC and the value of the contract was 28,248,625.00 USD. The contract began on 8 November, 2005 and the projected handover date for the project was 31 July, 2007. The initial payment for this project was 2,824,862.50 USD and the amount financed …	230	Energy Generation and Supply		Completion	3	Loan (excluding debt rescheduling)	Angola	http://www.ashgate.com/isbn/9781409448655, Other Academic (Working Paper, Dissertation); http://www.sinomach.com.cn/templates/T_news_Details/content.aspx?nodeid=19&contentid=17051, Implementing/Intermediary Agency Source; http://www.minfin.gv.ao/fsys/China_Projectos_concluidos%20_2008.pdf, Government Source (Donor/Recipient); http://www.oecd.org/countries/angola/38561655.pdf, NGO/Civil Society/Ad…	5	Export-Import Bank of China, Government Agency	China Machinery Engineering Corporation (CMEC)	Export-Import Bank of China, Government Agency; China Machinery Engineering Corporation (CMEC)	2			Checked	1	OOF-like	3	Mixed (Some Development)	6	Active	1		28248625	USD	0.696651	1	4.05492e+07	1.13667	4.60912e+07	28248625	2005-11-18		2007-07-31		1	Angola	540	225	Angola	AGO	AO	24
34847	China	Phase 1: Construction of Substations and LT 220 Kv in Cazenga, Luanda-Sul (linked to project ID#991 and ID#11612)	2005	FALSE	On 9 March, 2005 a contract was signed between China and Angola for the construction of substations and LT 220 Kv in Cazenga, Luanda-Sul. The contractor was CMEC and the value of the contract was 29,516,582.00 USD. The contract began on 9 November, 2005 and the projected handover date for the project was in September 2007. The initial payment for this project was 2,951,658.20 USD and the amount f…	230	Energy Generation and Supply		Completion	3	Loan (excluding debt rescheduling)	Angola	http://www.ashgate.com/isbn/9781409448655, Other Academic (Working Paper, Dissertation); http://www.minfin.gv.ao/fsys/China_Projectos_concluidos%20_2008.pdf, Government Source (Donor/Recipient); http://www.sinomach.com.cn/templates/T_news_Details/content.aspx?nodeid=19&contentid=17051, Implementing/Intermediary Agency Source; http://www.sasac.gov.cn/n1180/n1226/n2410/n314289/6246023.html, Governm…	4	Export-Import Bank of China, Government Agency	China Machinery Engineering Corporation (CMEC)	Export-Import Bank of China, Government Agency; China Machinery Engineering Corporation (CMEC)	2			Checked	1	OOF-like	3	Mixed (Some Development)	6	Active	1		29516582	USD	0.696651	1	4.23692e+07	1.13667	4.816e+07	29516582	2005-11-08		2007-11-30	2007-09-30	1	Angola	540	225	Angola	AGO	AO	24
34789	China	Phase 1: Construction of Third LT 220 Kv for Cambambe, Luanda (linked to project ID#991 and ID#11612)	2005	FALSE	On 9 March, 2005 a contract was signed between China and Angola for the construction of a third LT 220 Kv for Cambambe, Luanda. The contractor was China Machinery Engineering Corporation and the value of the contract was 38,367,701.00 USD. The contract began 8 November, 2005 and the projected handover date was November 2007. The initial payment for this project was 3,836,770.10 USD and the amount…	230	Energy Generation and Supply		Implementation	2	Loan (excluding debt rescheduling)	Angola	http://www.ashgate.com/isbn/9781409448655, Other Academic (Working Paper, Dissertation); http://www.oecd.org/countries/angola/38561655.pdf, NGO/Civil Society/Advocacy; http://www.hydroworld.com/articles/2007/04/third-unit-of-angolas-520-mw-capanda-begins-operation.html, Other Official Source (non-Donor, non-Recipient); http://www.sinomach.com.cn/templates/T_news_Details/content.aspx?nodeid=19&con…	5	Export-Import Bank of China, Government Agency	China Machinery Engineering Corporation (CMEC)	Export-Import Bank of China, Government Agency; China Machinery Engineering Corporation (CMEC)	2			Checked	1	OOF-like	3	Mixed (Some Development)	6	Active	1		38367701	USD	0.696651	1	5.50745e+07	1.13667	6.26017e+07	38367701	2005-11-08			2007-11-30	1	Angola	540	225	Angola	AGO	AO	24
34777	China	Phase 1: Construction of Two Secondary Schools in Malange (linked to project ID#991 and ID#11612)	2005	FALSE	On 10 March, 2005 a contract was signed between China and Angola for the construction of two secondary schools in Malanje (Malange, Melange). The contractor was SinoHydro and the value of the contract was 7,978,297.20 USD. The contract began on 20 March, 2006 and the projected handover date was the 18 September, 2007. The initial payment for this project was 797,829.72 USD and the amount financed…	110	Education		Completion	3	Loan (excluding debt rescheduling)	Angola	http://www.ashgate.com/isbn/9781409448655, Other Academic (Working Paper, Dissertation); http://www.csdsj.com/ywlm/engineering/international/13392.htm, Implementing/Intermediary Agency Source; http://www.minfin.gv.ao/fsys/China_Projectos_concluidos%20_2008.pdf, Government Source (Donor/Recipient); http://www.csdsj.com/zwlm/gcgl/hwgc/13274.htm, Implementing/Intermediary Agency Source	4	Export-Import Bank of China, Government Agency	SinoHydro , State-Owned Company	Export-Import Bank of China, Government Agency; SinoHydro , State-Owned Company	2			Checked	1	OOF-like	3	Mixed (Some Development)	6	Active	1		7.9783e+06	USD	0.696651	1	1.14524e+07	1.13667	1.30176e+07	7.9783e+06	2006-07-18		2008-02-19	2007-10-18	1	Angola	540	225	Angola	AGO	AO	24
34778	China	Phase 1: Construction of a Technical Institute and a Secondary School in Huila (linked to project ID#991 and ID#11612)	2005	FALSE	On 10 March, 2005 a contract was signed between China and Angola for the construction of a technical institute and a secondary school in the town of Mubada (?????), Lubango municipality, Huila province. The contractor was SinoHydro and the value of the contract was 14,313,018.63 USD. The contract began on 17 April, 2006 and the projected handover date was the 11 October, 2007. The initial payment…	110	Education		Completion	3	Loan (excluding debt rescheduling)	Angola	http://www.ashgate.com/isbn/9781409448655, Other Academic (Working Paper, Dissertation); http://www.csdsj.com/zwlm/gcgl/hwgc/13274.htm, Implementing/Intermediary Agency Source; http://www.sasac.gov.cn/n1180/n1226/n2410/n314289/4320620.html, Government Source (Donor/Recipient); http://www.csdsj.com/ywlm/engineering/international/13392.htm, Implementing/Intermediary Agency Source	4		SinoHydro , State-Owned Company	SinoHydro , State-Owned Company	1			Checked	1	OOF-like	3	Mixed (Some Development)	6	Active	1		1.4313e+07	USD	0.696651	1	2.05455e+07	1.13667	2.33535e+07	1.4313e+07	2006-09-21		2008-01-14	2007-11-11	1	Angola	540	225	Angola	AGO	AO	24
34773	China	Phase 1: Construction of two agriculture schools in Huambo and Biï¿½ (linked to project ID#991 and ID#11612)	2005	FALSE	On 4 March, 2005 a contract was signed between Angola and China for the construction of two agriculture schools in Ndango, Caï¿½la, Huambo Province and Andulo, Biï¿½ Province. The contractor for this project was SinoHydro and the value of the contract was 45,562,685.12 USD. The contract began 19 October 2005 and the projected handover date was 20 September 2005. The initial payment for the projec…	110	Education		Completion	3	Loan (excluding debt rescheduling)	Angola	http://www.ashgate.com/isbn/9781409448655, Other Academic (Working Paper, Dissertation); https://global-factiva-com.proxy.wm.edu/redir/default.aspx?P=sa&an=AFNWS00020080211e42b0005o&cat=a&ep=ASE, Media Report, including Wikileaks; http://www.portalangop.co.ao/angola/en_us/noticias/educacao/2008/1/8/Huambo-Education-Minister-Inaugurates-Medium-Agrarian-Institute,924bee61-6ba2-4462-bf01-4c713af2cd2…	7	Export-Import Bank of China, Government Agency	SinoHydro , State-Owned Company	Export-Import Bank of China, Government Agency; SinoHydro , State-Owned Company	2			Checked	1	OOF-like	3	Mixed (Some Development)	6	Active	1	https://global-factiva-com.proxy.wm.edu/redir/default.aspx?P=sa&an=AFNWS00020080211e42b0005o&cat=a&ep=ASE, Media Report, including Wikileaks	4.55627e+07	USD	0.696651	1	6.54024e+07	1.13667	7.43412e+07	4.55627e+07	2005-11-19			2007-08-20	1	Angola	540	225	Angola	AGO	AO	24
34784	China	Phase 1: Irrigation of Luena, Caxito, Gandjelas and Waco-Kungo (linked to project ID#991 and ID#11612)	2005	FALSE	On 2 March, 2005 a contract was signed between China and Angola for phase 1 of the irrigation of Luena (in Moxico), Caxito (in Bengo), Gandjelas (in Huila) and Waco-Kungo (in Kwanza-Sul). The contractor was SinoHydro and the contract was valued at 95,306,000.00 USD. The contract began on 28 July, 2005 and the projected handover date was 31 August, 2007. The initial payment for this project was 9,…	310	Agriculture, Forestry and Fishing		Completion	3	Loan (excluding debt rescheduling)	Angola	http://www.ashgate.com/isbn/9781409448655, Other Academic (Working Paper, Dissertation); http://www.minfin.gv.ao/fsys/China_Projectos_concluidos%20_2008.pdf, Government Source (Donor/Recipient)	2	Export-Import Bank of China, Government Agency	SinoHydro , State-Owned Company	Export-Import Bank of China, Government Agency; SinoHydro , State-Owned Company	2			Checked	1	OOF-like	3	Mixed (Some Development)	6	Active	1		95306000.0; 95306000.0	USD; USD	0.696651049563713; 0.696651049563713	1.0; 1.0	2.73612e+08	1.13667	3.11007e+08	190612000	2005-07-28		2007-08-31		1	Angola	540	225	Angola	AGO	AO	24
34849	China	Phase 1: Partial Rehabilitation of the Water Supply System in Luanda (linked to project ID#991 and ID#11612)	2005	FALSE	On 12 March, 2005 a contract was signed between China and Angola for the partial rehabilitation of the water supply system in Luanda. The contractor was CMEC and the value of the contract was 44,695,419.00 USD. The contract began on 18 November, 2005 and the projected handover date for the project was October, 2007. The initial payment for this project was 4,469,541.90 USD and the amount financed…	140	Water Supply and Sanitation		Implementation	2	Loan (excluding debt rescheduling)	Angola	http://www.ashgate.com/isbn/9781409448655, Other Academic (Working Paper, Dissertation); http://www.minfin.gv.ao/fsys/China_Projectos_concluidos%20_2008.pdf, Government Source (Donor/Recipient)	2	Export-Import Bank of China, Government Agency	China Machinery Engineering Corporation (CMEC)	Export-Import Bank of China, Government Agency; China Machinery Engineering Corporation (CMEC)	2			Checked	1	OOF-like	3	Mixed (Some Development)	6	Active	1		44695419	USD	0.696651	1	6.41575e+07	1.13667	7.29262e+07	44695419					1	Angola	540	225	Angola	AGO	AO	24
34786	China	Phase 1: Purchase of Agricultural Equipment, Machines and Tools (linked to project ID#991 and ID#11612)	2005	FALSE	On 11 August, 2004 a contract was signed between China and Angola for the purchase of agricultural equipment, machines and tools. The value of the contract was 22,368,090.00 USD. The contract began on 29 September, 2005. The contractor for this project is CMEC. The initial payment for this project was 2,236,809.00 USD and the amount financed by China as of December, 2007 was 20,131,281.00 USD. Th…	310	Agriculture, Forestry and Fishing		Completion	3	Loan (excluding debt rescheduling)	Angola	http://www.ashgate.com/isbn/9781409448655, Other Academic (Working Paper, Dissertation); http://www.minfin.gv.ao/fsys/China_Projectos_concluidos%20_2008.pdf, Government Source (Donor/Recipient)	2	Export-Import Bank of China, Government Agency	China Machinery Engineering Corporation (CMEC)	China Machinery Engineering Corporation (CMEC) ; Export-Import Bank of China, Government Agency	2			Checked	1	OOF-like	3	Mixed (Some Development)	6	Active	1		22368090	USD	0.696651	1	3.2108e+07	1.13667	3.64963e+07	22368090	2005-01-26				1	Angola	540	225	Angola	AGO	AO	24
34785	China	Phase 1: Purchase of Agriculture Equipment for MECANEGRO (linked to project ID#991 and ID#11612)	2005	FALSE	On 11 March, 2005 a contract was signed between China and Angola for the purchase of agriculture equipment for MECANEGRO. The contractor was China Machinery Engineering Corporation and the value of the contract was 32,079,124.00 USD . The contract began on 29 September 2005. The initial payment for this project was 3,207,912.40 USD and the amount financed by China as of December, 2007 was 28,871,…	310	Agriculture, Forestry and Fishing		Completion	3	Loan (excluding debt rescheduling)	Angola	http://www.ashgate.com/isbn/9781409448655, Other Academic (Working Paper, Dissertation); http://www.minfin.gv.ao/fsys/China_Projectos_concluidos%20_2008.pdf, Government Source (Donor/Recipient)	2	Export-Import Bank of China, Government Agency	China Machinery Engineering Corporation (CMEC)	Export-Import Bank of China, Government Agency; China Machinery Engineering Corporation (CMEC)	2			Checked	1	OOF-like	3	Mixed (Some Development)	6	Active	1		32079124	USD	0.696651	1	4.60476e+07	1.13667	5.23411e+07	32079124	2005-09-29				1	Angola	540	225	Angola	AGO	AO	24
34788	China	Phase 1: Reconstruction of LT 60 Kv and Substation at Quifangondo, Mabubas (linked to project ID#991 and ID#11612)	2005	FALSE	On 9 March, 2005 a contract was signed between China and Angola for the reconstruction of LT 60 Kv and substation at Quifangondo (Kifangondo), Mabubas. The contractor was China Machinery Engineering Corporation and the value of the contract was 14,594,171.56 USD. The contract began on 6 December, 2005 and the projected handover date was 15 March, 2007. The initial payment for this project was 1,4…	230	Energy Generation and Supply		Completion	3	Loan (excluding debt rescheduling)	Angola	http://www.ashgate.com/isbn/9781409448655, Other Academic (Working Paper, Dissertation); http://www.minfin.gv.ao/fsys/projectos_concluidos_Eximchina%20_fase_I.pdf, Government Source (Donor/Recipient); http://www.macauhub.com.mo/en/2007/01/22/2411/, Media Report, including Wikileaks; http://www.portalangop.co.ao/angola/pt_pt/noticias/sociedade/2006/11/51/ENE-vai-reinaugurar-linha-transporte-energi…	8	Export-Import Bank of China, Government Agency	Guangxi Hydroelectric Construction Bureau (GHCB), State-Owned Company; China Machine-Building International Corporation (CMIC), State-Owned Company	Guangxi Hydroelectric Construction Bureau (GHCB), State-Owned Company; China Machine-Building International Corporation (CMIC), State-Owned Company; Export-Import Bank of China, Government Agency	3			Checked	1	OOF-like	3	Mixed (Some Development)	6	Active	1	https://global-factiva-com.proxy.wm.edu/redir/default.aspx?P=sa&an=AFNWS00020060804e2830009o&cat=a&ep=ASE, Media Report, including Wikileaks	1.45942e+07	USD	0.696651	1	2.0949e+07	1.13667	2.38122e+07	1.45942e+07	2005-12-06			2007-03-15	1	Angola	540	225	Angola	AGO	AO	24
34798	China	Phase 1: Rehabilitation and Equipping of Benguela Central Hospital (linked to project ID#991 and ID#11612)	2005	FALSE	On 9 May, 2005 a contract was signed between China and Angola for the rehabilitation and equipping of Benguela Regional Hospital. The contractor was SinoHydro and the value of the contract was 40,521,731.00 USD. The contract began on 3 June, 2006 and the projected handover date for the project was 3 July, 2007; construction completed August 13, 2008. The initial payment for this project was 4,052…	120	Health		Completion	3	Loan (excluding debt rescheduling)	Angola	http://www.ashgate.com/isbn/9781409448655, Other Academic (Working Paper, Dissertation); http://www.zswj.com/topicindex.aspx?ParentId=100, Media Report, including Wikileaks; http://www.csdsj.com/zwlm/gcgl/hwgc/13268.htm, Implementing/Intermediary Agency Source	3		SinoHydro , State-Owned Company					Checked	1	OOF-like	3	Mixed (Some Development)	6	Active	1		40521731	USD	0.696651	1	5.81665e+07	1.13667	6.61163e+07	40521731					1	Angola	540	225	Angola	AGO	AO	24
34844	China	Phase 1: Rehabilitation and Equipping of Huambo Central Hospital and Provision of 86 Ambulances (linked to project ID#991 and ID#11612)	2005	FALSE	On 24 October, 2005 a contract was signed between China and Angola for rehabilitation and equipping of Huambo Central Hospital and for the provision of 86 ambulances. The contractor was SinoHydro and the value of the contract was 36,520,308.99 USD. The sections of the contract began on 1 August, 2006 and 21 April, 2007 and the projected handover date for the project was 1 Feburary, 2008. The init…	120	Health		Completion	3	Loan (excluding debt rescheduling)	Angola	http://repository.up.ac.za/bitstream/handle/2263/17253/Kiala_China(2010).pdf?sequence=1, Academic Journal Article; http://www.ashgate.com/isbn/9781409448655, Other Academic (Working Paper, Dissertation); http://www.sdssj.com/article/info/2546.html, Implementing/Intermediary Agency Source; http://13j.sinohydro.com/article/info/465.html, Implementing/Intermediary Agency Source; http://www.sdssj.com…	7	Export-Import Bank of China, Government Agency	SinoHydro , State-Owned Company	Export-Import Bank of China, Government Agency; SinoHydro , State-Owned Company	2			Checked	1	OOF-like	3	Mixed (Some Development)	6	Active	1		3.21343e+07	USD	0.696651	1	4.61268e+07	1.13667	5.24311e+07	3.21343e+07	2006-08-01			2008-08-01	1	Angola	540	225	Angola	AGO	AO	24
34796	China	Phase 1: Rehabilitation and Equipping of Malange Hospital (linked to project ID#991 and ID#11612)	2005	FALSE	On 9 May, 2005 a contract was signed between China and Angola for the rehabilitation and equipping of a hospital in Malange (Malanje), reportedly located in Calculama city. The contractor was SinoHydro and the value of the contract was 29,185,499.00 USD. The contract began on 9 June, 2006 and the projected handover date for the project was 9 December, 2007. The initial payment for this project wa…	120	Health		Completion	3	Loan (excluding debt rescheduling)	Angola	http://www.ashgate.com/isbn/9781409448655, Other Academic (Working Paper, Dissertation); http://www.csdsj.com/ywlm/engineering/international/13315.htm, Implementing/Intermediary Agency Source; http://allafrica.com/stories/200610120844.html, Media Report, including Wikileaks; http://saudebusiness365.com.br/noticias/detalhe/2660/angola-investe-us-29-milhoes-em-reforma-do-hospital-de-malanje, Media …	4	Export-Import Bank of China, Government Agency	SinoHydro , State-Owned Company	Export-Import Bank of China, Government Agency; SinoHydro , State-Owned Company	2			Checked	1	OOF-like	3	Mixed (Some Development)	6	Active	1		29185499	USD	0.696651	1	4.1894e+07	1.13667	4.76198e+07	29185499	2006-06-09	2006-03-09	2008-08-03	2007-12-09	1	Angola	540	225	Angola	AGO	AO	24
34853	China	Phase 1: Rehabilitation of the Highway in Quifangondo, Caxito, Uige and Negage (linked to project ID#991 and ID#11612)	2005	FALSE	On 28 February, 2005 a contract was signed between China and Angola for the rehabilitation of the highway in Quifangondo (also spelled Kifangondo), Caxito, Uige (also Uije) and Negage. The contractor was CRBC and the value of the contract was 211,684,100.65 USD. The contract began on 13 December, 2005 and the projected handover date for the project was 30 June, 2008. The initial payment for this …	210	Transport and Storage		Completion	3	Loan (excluding debt rescheduling)	Angola	http://www.ashgate.com/isbn/9781409448655, Other Academic (Working Paper, Dissertation); http://www.minfin.gv.ao/fsys/China-Relatorio_do_II_trim_2008SitedoMINFIN2.pdf, Government Source (Donor/Recipient)	2	Export-Import Bank of China, Government Agency	China Road & Bridge Corporation (CRBC), State-Owned Company	Export-Import Bank of China, Government Agency; China Road & Bridge Corporation (CRBC), State-Owned Company	2			Checked	1	OOF-like	3	Mixed (Some Development)	6	Active	1		2.11684e+08	USD	0.696651	1	3.0386e+08	1.13667	3.45389e+08	2.11684e+08	2005-12-13			2008-08-30	1	Angola	540	225	Angola	AGO	AO	24
34851	China	Phase 1: Rehabilitation of the Water Supply System in Caxito, Catete and Uige (linked to project ID#991 and ID#11612)	2005	FALSE	On 9 March, 2005 a contract was signed between China and Angola for the rehabilitation of the water supply system in Caxito, Catete and Uige. The contractor was CEIEC and the value of the contract was 21,539,269.00 USD. The contract began on 8 November, 2005 and the projected handover date for the project was October 2007. The initial payment for this project was 2,153,926.90 USD and the amount f…	140	Water Supply and Sanitation		Completion	3	Loan (excluding debt rescheduling)	Angola	http://www.ashgate.com/isbn/9781409448655, Other Academic (Working Paper, Dissertation); http://www.minfin.gv.ao/fsys/China_Projectos_concluidos%20_2008.pdf, Government Source (Donor/Recipient)	2	Export-Import Bank of China, Government Agency	China National Electric Import & Export Corporation, State-Owned Company	Export-Import Bank of China, Government Agency; China National Electric Import & Export Corporation, State-Owned Company	2			Checked	1	OOF-like	3	Mixed (Some Development)	6	Active	1		21539269	USD	0.696651	1	3.09183e+07	1.13667	3.5144e+07	21539269	2005-11-08		2007-10-31		1	Angola	540	225	Angola	AGO	AO	24
34850	China	Phase 1: Rehabilitation of the Water Supply System in Huambo (linked to project ID#991 and ID#11612)	2005	FALSE	On 9 March, 2005 a contract was signed between China and Angola for the rehabilitation of the water supply system in Huambo. The contractor was CMEC and the value of the contract was 22,374,027.00 USD. The contract began on 8 November, 2005 and the projected handover date for the project was October 2007. The initial payment for this project was 2,237,402.70 USD and the amount financed by China a…	140	Water Supply and Sanitation		Completion	3	Loan (excluding debt rescheduling)	Angola	http://www.ashgate.com/isbn/9781409448655, Other Academic (Working Paper, Dissertation); http://www.minfin.gv.ao/fsys/China_Projectos_concluidos%20_2008.pdf, Government Source (Donor/Recipient)	2	Export-Import Bank of China, Government Agency	China Machinery Engineering Corporation (CMEC)	Export-Import Bank of China, Government Agency; China Machinery Engineering Corporation (CMEC)	2			Checked	1	OOF-like	3	Mixed (Some Development)	6	Active	1		22374027	USD	0.696651	1	3.21165e+07	1.13667	3.6506e+07	22374027	2005-11-08		2007-10-31		1	Angola	540	225	Angola	AGO	AO	24
34884	China	Phase 2 (#11612): Completion of University Campus	2005	FALSE	Oct 7, 2005, the Chinese company China Jiangsu International and Angola signed a contract for the completion of a university campus. The contract value for the project was USD 48,420,000.00, and 120 Angolan workers and 200 Chinese workers worked on the project. The project was completed Dec 18, 2008. This project is part of Phase 2 of China EXIM Bank's 2 billion USD credit line to Angola in 2004.…	110	Education		Completion	3	Loan (excluding debt rescheduling)	Angola		0	Export-Import Bank of China, Government Agency	China Jiangsu International, State-Owned Company	Export-Import Bank of China, Government Agency; China Jiangsu International, State-Owned Company	2			Checked	1	ODA-like	2	Development	1	Active	1		48420000	USD	0.696651	1	6.9504e+07	1.13667	7.90033e+07	48420000		2007-06-18		2008-12-18	1	Angola	540	225	Angola	AGO	AO	24
34885	China	Phase 2 (#11612): Completion of the Palï¿½cio da Justiï¿½a	2005	FALSE	Oct 7, 2005, the Chinese company China Jiangsu International and Angola signed a contract for the completion of the Angolan Palï¿½cio da Justiï¿½a (High Court, lit. 'Justice Palace'). The contract value for the project was USD 41,070,000.00, and the project was completed Dec 18, 2008. The building is 12 stories tall and has an annex that houses electromechanical equipment, including four generato…	150	Government and Civil Society		Completion	3	Loan (excluding debt rescheduling)	Angola	http://www.ccs.org.za/downloads/DFID%203rd%20Edition.pdf, Other Academic (Working Paper, Dissertation); http://www.minfin.gv.ao/fsys/China-Relatorio_do_II_trim_2008SitedoMINFIN2.pdf, Government Source (Donor/Recipient); http://www.ashgate.com/isbn/9781409448655, Other Academic (Working Paper, Dissertation)	3	Export-Import Bank of China, Government Agency	China Jiangsu International, State-Owned Company	Export-Import Bank of China, Government Agency; China Jiangsu International, State-Owned Company	2			Checked	1	OOF-like	3	Mixed	4	Active	1		41070000	USD	0.696651	1	5.89535e+07	1.13667	6.70108e+07	41070000	2007-06-18	2007-06-18		2008-12-18	1	Angola	540	225	Angola	AGO	AO	24
34836	China	Phase 2 (#11612): Construction of multiple municipal hospitals, health centers	2005	FALSE	May 9, 2005, the Chinese corporation Sinohydro signed a contract with Angola to construct and equip three municipal hospitals in Huambo, Huila, and Benguela, as well as two health centers in Benguela and two health centers in Huila. The contract value was 43,805,500.00 USD. The hospitals were handed over Dec 15, 2008; the health centers were handed over Sep 5, 2008. The initial payment on the pro…	120	Health		Completion	3	Loan (excluding debt rescheduling)	Angola	http://www.ashgate.com/isbn/9781409448655, Other Academic (Working Paper, Dissertation); http://www.csdsj.com/zwlm/gcgl/hwgc/13270.htm, Implementing/Intermediary Agency Source; http://www.csdsj.com/zwlm/gcgl/hwgc/13271.htm, Implementing/Intermediary Agency Source	3	Export-Import Bank of China, Government Agency	SinoHydro , State-Owned Company	Export-Import Bank of China, Government Agency; SinoHydro , State-Owned Company	2			Checked	1	ODA-like	2	Development	1	Active	1		39424950	USD	0.696651	1	5.65921e+07	1.13667	6.43267e+07	39424950		2007-01-17			1	Angola	540	225	Angola	AGO	AO	24
58	China	China offers Angola Interest-Free Loan for technical projects	2005	FALSE	The Chinese government has decided to grant Angola a new loan worth 50 million yens, approximately 6.3m dollars, interest free, with a view to strengthening bilateral relations. The agreement was signed by Chinese Vice-Premier Zeng Peiyan and Angolan Prime Minister Fernando da Piedade Dias dos Santos. One source reported that the agreements were oil related and to be used for 'technical projects.'	998	Unallocated / Unspecified	Oil	Pipeline: Commitment	11	Loan (excluding debt rescheduling)	Angola	http://www.ide.go.jp/English/Data/Africa_file/Manualreport/cia_11.html, Other Official Source (non-Donor, non-Recipient); http://global.factiva.com/aa/?ref=BBCAP00020050225e12p002xm&pp=1&fcpil=en&napc=S&sa_from=, Media Report, including Wikileaks; http://iis-db.stanford.edu/docs/785/CISAC_Thesis_Thompson.pdf, Other Academic (Working Paper, Dissertation)	3							Checked	1	ODA-like	2	Development	1	Active	1	http://global.factiva.com/aa/?ref=BBCAP00020050225e12p002xm&pp=1&fcpil=en&napc=S&sa_from=, Media Report, including Wikileaks	6300000	USD	0.696651	1	9.04326e+06	1.13667	1.02792e+07	6300000					1	Angola	540	225	Angola	AGO	AO	24
34486	China	Reconstruction of Ganjelas Hydroelectric Dam (Linked to #34784)	2005	FALSE	Reconstruction work on the Ganjelas dam, in Angolaï¿½s Huï¿½la province, was finished January 2009. Construction began November 2005 and was originally expected to conclude in mid September but was extended to January 2009 for the construction of a hydro station. The infrastructure irrigates its perimeter with an extension of 2,150 hectares. The project also included an irrigation channel through…	230	Energy Generation and Supply		Completion	3	Loan (excluding debt rescheduling)	Angola	http://www.macauhub.com.mo/en/2008/08/27/5648/, Media Report, including Wikileaks; http://blogs.ft.com/beyond-brics/2014/08/08/chinese-dams-in-africa/?, NGO/Civil Society/Advocacy; http://repository.up.ac.za/bitstream/handle/2263/17253/Kiala_China(2010).pdf?sequence=1, Academic Journal Article; http://www.internationalrivers.org/files/attached-files/afrdamsbriefingjune2010.pdf, NGO/Civil Society/…	5	Export-Import Bank of China, Government Agency	SinoHydro , State-Owned Company	Export-Import Bank of China, Government Agency; SinoHydro , State-Owned Company	2			Checked	1	OOF-like	3	Mixed (Some Development)	6	Active	1							1.13667	0		2005-11-15		2009-01-15		1	Angola	540	225	Angola	AGO	AO	24
59	China	Agricultural Donation	2005	FALSE	In 2005, China donated 46 containers (960 tons) of agricultural and other inputs worth roughly $1.0003 million USD to Angola. These containers are mainly for farmers of the northern Malanje province. The donation includes 150,000 hoes and handles, 159,000 axes, 218,697 cutlasses, 50 scythes, and 1,000 plows. Chinese Ambassador to Angola, Zhang Beisan, handed over the deal to the Social Welfare De…	310	Agriculture, Forestry and Fishing		Completion	3	Grant	Angola	http://books.google.com/books?id=9V6KiGcOsKYC&pg=PA162, Other; http://allafrica.com/stories/200507250201.html, Media Report, including Wikileaks; http://www.mbendi.com/indy/agff/af/an/p0005.htm, Media Report, including Wikileaks; www.ccs.org.za/wp-content/uploads/2009/04/dfid-3rd-edition.pdf, Other Academic (Working Paper, Dissertation)	4							Checked	1	ODA-like	2	Development	1	Active	1		1000300	USD	0.696651	1	1.43587e+06	1.13667	1.63211e+06	1000300			2005-07-23		1	Angola	540	225	Angola	AGO	AO	24
60	China	Marburg fever medicine	2005	FALSE	In 2005, the Chinese government offered to send in medicine worth 1 million Chinese Yuan in order to aid the efforts in combating the spread of the Marburg hemorrhagic fever in Angola. It is unclear if the medicines were ever received, and if so, how they were used.	120	Health	Marburg Fever	Pipeline: Pledge	12	Grant	Angola	http://allafrica.com/stories/200504070567.html, Media Report, including Wikileaks	1							Checked	1	ODA-like	2	Development	1	Active	1		1000000	CNY	0.696651	8.19432	175175	1.13667	199117	122036					1	Angola	540	225	Angola	AGO	AO	24
991	China	National Rehabilitation Projects Phase 1 (Linked to #11612)	2004	FALSE	In 2004, Chinaï¿½s Exim Bank agreed to provide Angola with an oil-backed loan. The funds were to be used in the repair of damaged infrastructure, mainly railway tracks, bombed in the countryï¿½s civil war. The money will also build roads, electrify slums surrounding the capital and fund rehabilitation of the water supply systems. This project was to involve two phases, each worth 1 billion USD (s…	430	Other Multisector	Water, electricity, health, education, public works	Completion	3	Loan (excluding debt rescheduling)	Angola	http://www.macauhub.com.mo/en/2007/10/22/3914/, Media Report, including Wikileaks; https://publications.worldbank.org/index.php?main_page=product_info&products_id=22946, Other Official Source (non-Donor, non-Recipient); http://www.chinaafricarealstory.com/2011/10/china-and-oil-backed-loans-in-angola.html, Social Media, including Unofficial Blogs; http://www.osisa.org/books/regional/chinese-involv…	25	Export-Import Bank of China, Government Agency	SinoHydro , State-Owned Company	Export-Import Bank of China, Government Agency	1			Checked	1	OOF-like	3	Mixed (Some Development)	6	Active	1							1.13667	0			2004-03-01			1	Angola	540	225	Angola	AGO	AO	24
11612	China	National Rehabilitation Projects Phase 2 (Linked to #991)	2004	FALSE	In 2004, China's Exim-Bank committed to provide Angola with an oil-backed loan to be used for national rehabilitation projects to improve telecommunications, fisheries, health, infrastructure, education, and public works. This project consisted of two phases totaling 2 billion USD in lines of credit (see project ID#991). The second phase of 1 billion USD included 18 contracts and 57 projects, som…	430	Other Multisector	Telecommunications, health, fisheries, infrastructure, public works, education	Completion	3	Loan (excluding debt rescheduling)	Angola	http://www.macauhub.com.mo/en/2007/10/22/3914/, Media Report, including Wikileaks; https://publications.worldbank.org/index.php?main_page=product_info&products_id=22946, Other Official Source (non-Donor, non-Recipient); http://www.chinaafricarealstory.com/2011/10/china-and-oil-backed-loans-in-angola.html, Social Media, including Unofficial Blogs; http://www.cmi.no/publications/file/3938-china-and…	7	Export-Import Bank of China, Government Agency	Luanda Electricity Distribution Co. (EDEL), State-Owned Company	Export-Import Bank of China, Government Agency	1	Luanda Electricity Distribution Co. (EDEL), State-Owned Company	1	Checked	1	OOF-like	3	Mixed (Some Development)	6	Active	1							1.13667	0						1	Angola	540	225	Angola	AGO	AO	24
34787	China	Phase 1: Rehabilitation and Expansion of Luanda Electric Grid (Phase II) (linked to project ID#991 and ID#11612)	2004	FALSE	On 5 July, 2004 a contract was signed between China and Angola for the Phase II rehabilitation and expansion of Luanda's electrical grid. The contractor was China Machine-Building International Cooperation and the value of the contract was 44,509,315.02 USD. The contract began on 5 June, 2005 and the projected handover date was 30 September, 2007. The initial payment for this project was 4,450,93…	230	Energy Generation and Supply		Implementation	2	Loan (excluding debt rescheduling)	Angola	http://www.ashgate.com/isbn/9781409448655, Other Academic (Working Paper, Dissertation); https://publications.worldbank.org/index.php?main_page=product_info&products_id=22946, Other Official Source (non-Donor, non-Recipient); http://www.eximbank.gov.cn/topic/hwtz/2006/5_03.doc, Government Source (Donor/Recipient); http://gjjtb.sinomach.com.cn/shtml/gjjtb/20040802/13438.shtml, Implementing/Interme…	7	Export-Import Bank of China, Government Agency	China Machine-Building International Corporation (CMIC), State-Owned Company	Export-Import Bank of China, Government Agency; China Machine-Building International Corporation (CMIC), State-Owned Company	2			Checked	1	OOF-like	3	Mixed (Some Development)	6	Active	1		4.45093e+07	USD	0.663629	1	6.70695e+07	1.13667	7.62362e+07	4.45093e+07	2005-07-05			2007-09-30	1	Angola	540	225	Angola	AGO	AO	24
34772	China	Phase 1: Support to Bus Transport (linked to project ID#991 and ID#11612)	2004	FALSE	On 9 August, 2004 a contract was signed between Angola and China for the provision of 250 vehicles to support Angola's bus transport. The value of the contract was 13,840,468.00 USD and the contract began 27 December, 2004. Of these 250 vehicles, 189 were assigned to 'former combatants,' 23 were 'for distribution (non-conformity of documentation),' 25 were delivered to the 'Military House,' 10 we…	210	Transport and Storage		Completion	3	Loan (excluding debt rescheduling)	Angola	http://www.ashgate.com/isbn/9781409448655, Other Academic (Working Paper, Dissertation); http://www.minfin.gv.ao/fsys/China_Projectos_concluidos%20_2008.pdf, Government Source (Donor/Recipient)	2	Export-Import Bank of China, Government Agency		Export-Import Bank of China, Government Agency	1			Checked	1	OOF-like	3	Mixed (Some Development)	6	Active	1		13840468	USD	0.663629	1	2.08557e+07	1.13667	2.37061e+07	13840468		2004-12-27		2005-06-30	1	Angola	540	225	Angola	AGO	AO	24
57	China	Journalist exchange	2004	FALSE	In 2004, six Angolan journalists with state-run media institutions left from Luanda for China for an interchange and study visit. The journalists will be in China for 15 days, visiting Beijing and Hong-Kong. The project was organized by the Chinese Embassy in Angola.	150	Government and Civil Society	Journalism	Implementation	2	Scholarships/training in the donor country	Angola	http://global.factiva.com/aa/?ref=AFNWS00020040907e0970013r&pp=1&fcpil=en&napc=S&sa_from=, Media Report, including Wikileaks	1			Chinese Embassy to Angola, Government Agency	1			Checked	1	ODA-like	2	Development	1	Active	1	http://global.factiva.com/aa/?ref=AFNWS00020040907e0970013r&pp=1&fcpil=en&napc=S&sa_from=, Media Report, including Wikileaks						1.13667	0						1	Angola	540	225	Angola	AGO	AO	24
844	China	China offers Angola interest-free loan for economic houses	2003	FALSE	In 2003, China completed 15,000 square meters worth of economic housing in Luanda, Angola. The total project cost was 11 million USD funded with a Chinese interest-free loan. It is unclear what the details of the project are.	160	Other Social infrastructure and services		Completion	3	Loan (excluding debt rescheduling)	Angola	http://global.factiva.com/aa/?ref=BDU0000020031124dzbo0000p&pp=1&fcpil=en&napc=S&sa_from=, Media Report, including Wikileaks	1							Checked	1	ODA-like	2	Development	1	Active	1	http://global.factiva.com/aa/?ref=BDU0000020031124dzbo0000p&pp=1&fcpil=en&napc=S&sa_from=, Media Report, including Wikileaks	11000000	USD	0.620703	1	1.77219e+07	1.13667	2.0144e+07	11000000			2003-01-01		1	Angola	540	225	Angola	AGO	AO	24
52	China	Tuberculosis Medicine	2003	FALSE	In June of 2003, the People's Republic of China was to donate medicines worth $300,000 US dollars to the Angolan Government to help with the shortage of TB-related drugs in public hospitals. The Angolan government had made a public appeal two years ago to help the people fight against tuberculosis. The medicines were to be handed over to the Health Minister, Albertina Hamukuaya, by the Chinese am…	120	Health		Pipeline: Pledge	12	Grant	Angola	http://allafrica.com/stories/200306200658.html, Media Report, including Wikileaks	1							Checked	1	ODA-like	2	Development	1	Active	1		300000	USD	0.620703	1	483323	1.13667	549381	300000					1	Angola	540	225	Angola	AGO	AO	24
56	China	Infrastructure loan	2003	FALSE	In 2003, the Chinese government granted a loan to Angola worth roughly $300 million USD to be used in the rehabilitation of railway, electrical energy network, drinking water system and other areas. It is unclear exactly how the funds were used. Further details on the loan are unclear.	430	Other Multisector		Implementation	2	Loan (excluding debt rescheduling)	Angola	http://www.sadocc.at/news/2004-173.shtml, Media Report, including Wikileaks; http://business.sohu.com/20060321/n242398146.shtml, Media Report, including Wikileaks	2							Checked	1	Vague (Official Finance)	5	Development	1	Active	1		300000000	USD	0.620703	1	4.83323e+08	1.13667	5.49381e+08	300000000					1	Angola	540	225	Angola	AGO	AO	24
34589	China	Rehabilitation of Electricity Network of Lubango	2002	FALSE	In 2002 China's Export-Import Bank along with China Construction Bank (CCB) provided a line of credit to Angola that funded various construction and infrastructure projects in Angola that totaled 145 million USD. One of these was the rehabilitation of electricity networks in Lubango and was worth 15 million USD. Details on the completion of this project are unclear. Other projects included in thi…	230	Energy Generation and Supply		Pipeline: Commitment	11	Loan (excluding debt rescheduling)	Angola	https://lup.lub.lu.se/luur/download?func=downloadFile&recordOId=1666736&fileOId=1666737, Other Academic (Working Paper, Dissertation); http://repository.up.ac.za/bitstream/handle/2263/17253/Kiala_China(2010).pdf?sequence=1, Academic Journal Article	2	Export-Import Bank of China, Government Agency; China Construction Bank Corporation (CCB), State-Owned Company						Checked	1	OOF-like	3	Mixed (Some Development)	6	Active	1		15000000	USD	0.604911	1	2.4797e+07	1.13667	2.81861e+07	15000000					1	Angola	540	225	Angola	AGO	AO	24
34594	China	Rehabilitation of Electricity Networks in Namibe and Tombowa	2002	FALSE	In 2002 China's Export-Import Bank along with China Construction Bank (CCB) provided a line of credit to Angola that funded various construction and infrastructure projects in Angola that totaled 145 million USD. One of these was the rehabilitation of electricity networks in Namibe and Tombowa worth 25 million USD. Details on the completion of this project are unclear. Other projects included in …	230	Energy Generation and Supply		Pipeline: Commitment	11	Loan (excluding debt rescheduling)	Angola	https://lup.lub.lu.se/luur/download?func=downloadFile&recordOId=1666736&fileOId=1666737, Other Academic (Working Paper, Dissertation); http://repository.up.ac.za/bitstream/handle/2263/17253/Kiala_China(2010).pdf?sequence=1, Academic Journal Article	2	China Construction Bank Corporation (CCB), State-Owned Company; Export-Import Bank of China, Government Agency						Checked	1	OOF-like	3	Mixed (Some Development)	6	Active	1		25000000	USD	0.604911	1	4.13284e+07	1.13667	4.69769e+07	25000000					1	Angola	540	225	Angola	AGO	AO	24
48	China	Buying Goods for UNITA Soldiers	2002	FALSE	In July of 2002, China donated 5 million CNY to buy goods for UNITA soliders (National Union for the Total Independence of Angola) and their relatives, who are living in confinement areas. The Chinese deputy minister for Foreign Affairs talked with Angolan counterpart Toko Serao about the details, but they are unknown to open reports. Further details of the donation are uncertain.	700	Emergency Response		Completion	3	Grant	Angola	http://global.factiva.com/aa/?ref=bbcap00020020718dy7i005v5&pp=1&fcpil=en&napc=S&sa_from=, Media Report, including Wikileaks	1		National Union for the Total Independence of Angola (UNITA), Political Party			National Union for the Total Independence of Angola (UNITA), Political Party	1	Checked	1	ODA-like	2	Development	1	Active	1	http://global.factiva.com/aa/?ref=bbcap00020020718dy7i005v5&pp=1&fcpil=en&napc=S&sa_from=, Media Report, including Wikileaks	5000000	CNY	0.604911	8.27696	998637	1.13667	1.13512e+06	604087					1	Angola	540	225	Angola	AGO	AO	24
51	China	Computer donation	2002	FALSE	In 2002, Chinese Ambassador to Angola donated 19 computers to Angola's ruling Popular Movement for the Liberation of Angola (MPLA) political party. It is unclear how much the computers were worth or where they were ultimately used.	150	Government and Civil Society		Completion	3	Grant	Angola	http://global.factiva.com/aa/?ref=bbcapp0020020308dy38005k1&pp=1&fcpil=en&napc=S&sa_from=, Media Report, including Wikileaks	1							Checked	1	OOF-like	3	Representational	3	Active	1	http://global.factiva.com/aa/?ref=bbcapp0020020308dy38005k1&pp=1&fcpil=en&napc=S&sa_from=, Media Report, including Wikileaks						1.13667	0						1	Angola	540	225	Angola	AGO	AO	24
47	China	Demining Equipment	2002	FALSE	On April 16, 2002, the Angolan and Chinese governments signed an accord for logistical and demining equipment for the Angolan Armed Forces. They would help the military personnel and impact the reopening of roads in the country. General Demostenes Amos Chilingutila, the Vice Minister of Defense for Angola, and Jian Yaunde, the Chinese Ambassador, signed the agreeement in Luanda. The equipment don…	150	Government and Civil Society		Pipeline: Commitment	11	Grant	Angola	http://global.factiva.com/aa/?ref=bbcap00020020417dy4h006y2&pp=1&fcpil=en&napc=S&sa_from=, Media Report, including Wikileaks	1		Angolan Armed Forces, Government Agency			Angolan Armed Forces, Government Agency	1	Checked	1	ODA-like	2	Development	1	Active	1	http://global.factiva.com/aa/?ref=bbcap00020020417dy4h006y2&pp=1&fcpil=en&napc=S&sa_from=, Media Report, including Wikileaks	900000	USD	0.604911	1	1.48782e+06	1.13667	1.69117e+06	900000					1	Angola	540	225	Angola	AGO	AO	24
49	China	Medicine, Equipment and Humanitarian Aid	2002	FALSE	Angolan President Jose Eduardo dos Santos received a message on July 18, 2002 sent by Chinese President Jiang Zemin, congratulating him on the re-establishment of peace in his country. The Chinese deputy minister for foreign affairs, Yang Wenchang, who arrived in Angola on July 16, presented the message to the Angolan president. Wenchang later announced the arrival of medicines in Luanda, 3,000 w…	700	Emergency Response		Completion	3	Grant	Angola	http://global.factiva.com/aa/?ref=bbcap00020020719dy7j0038r&pp=1&fcpil=en&napc=S&sa_from=, Media Report, including Wikileaks; http://global.factiva.com/aa/?ref=bbcap00020020718dy7i005v5&pp=1&fcpil=en&napc=S&sa_from=, Media Report, including Wikileaks	2		Angola Social and Productive Reintegration Commission for Demobilized and Displaced Persons, Government Agency			Angola Social and Productive Reintegration Commission for Demobilized and Displaced Persons, Government Agency	1	Checked	1	ODA-like	2	Development	1	Active	1	http://global.factiva.com/aa/?ref=bbcap00020020719dy7j0038r&pp=1&fcpil=en&napc=S&sa_from=, Media Report, including Wikileaks; http://global.factiva.com/aa/?ref=bbcap00020020718dy7i005v5&pp=1&fcpil=en&napc=S&sa_from=, Media Report, including Wikileaks	300000	USD	0.604911	1	495941	1.13667	563723	300000					1	Angola	540	225	Angola	AGO	AO	24
206	China	Angola Telecom Network Expansion Project, Phase 1	2002	FALSE	(PPIAF) In 2002, a 50-50 Chinese-French joint venture agreed to install a fibre link from the city of Lubango to the coastal city of Namibe. In addition, they agreed to deploy switching equipment, fibre-optic transmission infrastructure and synchronous digital hierarchy (SDH) multiplexers, as well as the deployment of one new satellite earth station and the reconstruction of four others. This pro…	220	Communications	Telecom; Fixed assets	Completion	3	Loan (excluding debt rescheduling)	Angola	http://books.google.com/books?id=osgRwg1pWKoC&pg=PA240&lpg=PA240, Other; https://publications.worldbank.org/index.php?main_page=product_info&products_id=22946, Other Official Source (non-Donor, non-Recipient); http://www.eximbank.gov.cn/topic/hwtz/2006/5_02.doc, Government Source (Donor/Recipient); https://lup.lub.lu.se/luur/download?func=downloadFile&recordOId=1666736&fileOId=1666737, Other Acad…	4	Export-Import Bank of China, Government Agency	Alcatel-Lucent Shanghai Bell Co., Ltd., State-Owned Company	Export-Import Bank of China, Government Agency; Alcatel-Lucent Shanghai Bell Co., Ltd., State-Owned Company	2			Checked	1	Vague (Official Finance)	5	Development	1	Active	1							1.13667	0			2002-05-01			1	Angola	540	225	Angola	AGO	AO	24
103	China	Rehabilitation and Extension of the Electrical System in Luanda, Phase 1	2002	FALSE	(PPIAF) In 2002, China Machine-Building International Corporation (CMIC) agreed to undertake three phases of the Project for Rehabilitation and Extension of the Electrical System in Luanda. CMIC completed the first phase of the project. The project value for the first phase was 15 million USD, financed by China's Export-Import Bank and China Construction Bank (CCB). Other projects included under …	230	Energy Generation and Supply	Electricity; power networks	Completion	3	Loan (excluding debt rescheduling)	Angola	https://publications.worldbank.org/index.php?main_page=product_info&products_id=22946, Other Official Source (non-Donor, non-Recipient); https://lup.lub.lu.se/luur/download?func=downloadFile&recordOId=1666736&fileOId=1666737, Other Academic (Working Paper, Dissertation); http://repository.up.ac.za/bitstream/handle/2263/17253/Kiala_China(2010).pdf?sequence=1, Academic Journal Article	3	China Construction Bank Corporation (CCB), State-Owned Company; Export-Import Bank of China, Government Agency	China Machine-Building International Corporation (CMIC), State-Owned Company	Export-Import Bank of China, Government Agency; China Machine-Building International Corporation (CMIC), State-Owned Company	2			Checked	1	OOF-like	3	Development	1	Active	1		15000000	USD	0.604911	1	2.4797e+07	1.13667	2.81861e+07	15000000					1	Angola	540	225	Angola	AGO	AO	24
152	China	Rehabilitation of Luanda Railway, Phase 1	2002	FALSE	(PPIAF) In 2002, China Construction Bank and Ex-Im Bank financed the Phase 1 Rehabilitation of the Luanda Railway. The railway is 444 km long, and consists of a railway, bridges, and 16 stations along the route. In addition, there are some telecommunication and signal works. The Chinese commitment is 90 million USD. This was part of the first line of funding to Angola from China that involved oth…	210	Transport and Storage	Transport; Railway	Completion	3	Loan (excluding debt rescheduling)	Angola	http://global.factiva.com/aa/?ref=qedcer0020020902dy920000t&pp=1&fcpil=en&napc=S&sa_from=, Media Report, including Wikileaks; http://global.factiva.com/aa/?ref=BDU0000020031124dzbo0000p&pp=1&fcpil=en&napc=S&sa_from=, Media Report, including Wikileaks; http://www.macauhub.com.mo/en/2008/08/28/5654/, Media Report, including Wikileaks; http://english.people.com.cn/90001/90776/90883/6490177.html, Med…	8	Export-Import Bank of China, Government Agency	China Machinery Engineering Corporation (CMEC)	Export-Import Bank of China, Government Agency; China Machinery Engineering Corporation (CMEC)	2			Checked	1	OOF-like	3	Development	1	Active	1	http://global.factiva.com/aa/?ref=qedcer0020020902dy920000t&pp=1&fcpil=en&napc=S&sa_from=, Media Report, including Wikileaks; http://global.factiva.com/aa/?ref=BDU0000020031124dzbo0000p&pp=1&fcpil=en&napc=S&sa_from=, Media Report, including Wikileaks	90000000	USD	0.604911	1	1.48782e+08	1.13667	1.69117e+08	90000000					1	Angola	540	225	Angola	AGO	AO	24
4	China	China Funds Construction of Luanda's Gentral Hospital in Kilamba Kiaxi	2001	FALSE	In May 2001, a Chinese economic and trade delegation signed economic accords on cooperation and debt reduction with the Angolan government during a three-day visit to Luanda. The Chinese government extended an interest-free line of credit totaling about $6 million. Angola's Deputy Minister of Foreign Affairs, George Chicoty, signed the agreements with China's Vice Minister of External Trade and E…	120	Health		Completion	3	Loan (excluding debt rescheduling)	Angola	http://global.factiva.com/aa/?ref=BBCAP00020040528e05s00105&pp=1&fcpil=en&napc=S&sa_from=, Media Report, including Wikileaks; http://global.factiva.com/aa/?ref=bbcae00020010710dx5o000dk&pp=1&fcpil=en&napc=S&sa_from=, Media Report, including Wikileaks; http://global.factiva.com/aa/?ref=afnws00020021107dx6s01wmb&pp=1&fcpil=en&napc=S&sa_from=, Media Report, including Wikileaks; http://www.chinaafric…	10		China Overseas Engineering Group Co., Ltd. , Government Agency	China Overseas Engineering Group Co., Ltd. , Government Agency	1			Checked	1	OOF-like	3	Development	1	Active	1	http://global.factiva.com/aa/?ref=BBCAP00020040528e05s00105&pp=1&fcpil=en&napc=S&sa_from=, Media Report, including Wikileaks; http://global.factiva.com/aa/?ref=bbcae00020010710dx5o000dk&pp=1&fcpil=en&napc=S&sa_from=, Media Report, including Wikileaks; http://global.factiva.com/aa/?ref=afnws00020021107dx6s01wmb&pp=1&fcpil=en&napc=S&sa_from=, Media Report, including Wikileaks	6000000	USD	0.60139	1	9.97689e+06	1.13667	1.13405e+07	6000000	2004-05-26				1	Angola	540	225	Angola	AGO	AO	24
5	China	Debt Remission	2001	FALSE	In May 2001, a Chinese economic and trade delegation promised to dismiss about 10 percent of Angola's $80 million external debt to China during a three-day visit to Luanda.The status of the debt forgiveness is uncertain.	600	Action Relating to Debt		Pipeline: Pledge	12	Debt forgiveness	Angola	http://global.factiva.com/aa/?ref=afnws00020021107dx6s01wmb&pp=1&fcpil=en&napc=S&sa_from=, Media Report, including Wikileaks	1							Checked	1	ODA-like	2	Development	1	Active	1	http://global.factiva.com/aa/?ref=afnws00020021107dx6s01wmb&pp=1&fcpil=en&napc=S&sa_from=, Media Report, including Wikileaks	8000000	USD	0.60139	1	1.33025e+07	1.13667	1.51206e+07	8000000					1	Angola	540	225	Angola	AGO	AO	24
13	China	Computers and Sewing Machines	2001	FALSE	In October 2001, China's Ambassador to Angola, Jiang Yuande, delivered 10 computers and 40 sewing machines to the Popular Movement for the Liberation of Angola policy party headquarters in Luanda.	150	Government and Civil Society		Completion	3	Grant	Angola	http://global.factiva.com/aa/?ref=bbcap00020011015dxaf002mh&pp=1&fcpil=en&napc=S&sa_from=, Media Report, including Wikileaks	1							Checked	1	ODA-like	2	Development	1	Active	1	http://global.factiva.com/aa/?ref=bbcap00020011015dxaf002mh&pp=1&fcpil=en&napc=S&sa_from=, Media Report, including Wikileaks						1.13667	0						1	Angola	540	225	Angola	AGO	AO	24
6	China	Food Aid	2001	FALSE	On May 17, 2001, the Angolan government received more than $600,000 in aid from China, aimed to alleviate the sufferings of the 115,000 people displaced by the heavy floods earlier this year. Angolan Minister of Assistance and Social Reintegration Albino Malungo spoke at the handover ceremony. The aid included 100 tons of rice, 24,000 tins of beef and luncheon meat, cooking utensils, and other da…	700	Emergency Response		Completion	3	Grant	Angola	http://global.factiva.com/aa/?ref=xnews00020010715dx5h004ng&pp=1&fcpil=en&napc=S&sa_from=, Media Report, including Wikileaks	1							Checked	1	ODA-like	2	Development	1	Active	1	http://global.factiva.com/aa/?ref=xnews00020010715dx5h004ng&pp=1&fcpil=en&napc=S&sa_from=, Media Report, including Wikileaks	600000	USD	0.60139	1	997689	1.13667	1.13405e+06	600000	2001-05-17		2001-05-17		1	Angola	540	225	Angola	AGO	AO	24
12	China	Furniture for Angolan Chancellory	2001	FALSE	On January 16, 2001, Chinese Minister Tang Jiaxuan committed a contribution of 200 million yuan in office furniture for the Angolan chancellory.	150	Government and Civil Society		Completion	3	Grant	Angola	http://global.factiva.com/aa/?ref=bbcaf00020010709dx1i000di&pp=1&fcpil=en&napc=S&sa_from=, Media Report, including Wikileaks; http://www.fmprc.gov.cn/mfa_chn/wjdt_611265/wjbxw_611271/t6495.shtml, Government Source (Donor/Recipient)	2							Checked	1	ODA-like	2	Development	1	Active	1	http://global.factiva.com/aa/?ref=bbcaf00020010709dx1i000di&pp=1&fcpil=en&napc=S&sa_from=, Media Report, including Wikileaks	200000000	CNY	0.60139	8.27707	4.01789e+07	1.13667	4.56702e+07	2.41631e+07					1	Angola	540	225	Angola	AGO	AO	24
9	China	$50 million Loan to Angolan Govenrment	2001	FALSE	The Chinese government extended a US$50 million loan to the Angolan government. This was announced during a meeting between the Angolan deputy external relations minister, Jorge Chicoty, and the Chinese minister of foreign trade and economic cooperation, Shi Guangsheng in May of 2001. Further details and conditions are not known.	998	Unallocated / Unspecified		Pipeline: Pledge	12	Loan (excluding debt rescheduling)	Angola	http://global.factiva.com/aa/?ref=bbcapp0020010709dx5o00che&pp=1&fcpil=en&napc=S&sa_from=, Media Report, including Wikileaks	1							Checked	1	Vague (Official Finance)	5	Development	1	Active	1	http://global.factiva.com/aa/?ref=bbcapp0020010709dx5o00che&pp=1&fcpil=en&napc=S&sa_from=, Media Report, including Wikileaks	50000000	USD	0.60139	1	8.31408e+07	1.13667	9.45039e+07	50000000					1	Angola	540	225	Angola	AGO	AO	24
10	China	Judicial training	2000	FALSE	In 2001, Attorney General Domingos Culolo said Angolan magistrates would soon undergo training in China under the terms of an agreement signed in 2000. The accord provides, among other things, for the training of personnel, the exchange of delegations, and mutual assistance. The status of the training is uncertain.	150	Government and Civil Society		Pipeline: Commitment	11	Scholarships/training in the donor country	Angola	http://global.factiva.com/aa/?ref=bbcapp0020010710dx52007p0&pp=1&fcpil=en&napc=S&sa_from=, Media Report, including Wikileaks	1							Checked	1	ODA-like	2	Development	1	Active	1	http://global.factiva.com/aa/?ref=bbcapp0020010710dx52007p0&pp=1&fcpil=en&napc=S&sa_from=, Media Report, including Wikileaks						1.13667	0			2001-01-01			1	Angola	540	225	Angola	AGO	AO	24
30849	China	Loan for Economic Development	2013	FALSE	On November 15, 2013, the Chinese government granted Benin financial assistance of 200 million RMB yuan (over 16 billion CFA francs) to finance projects of existing cooperation between the two countries. The financial assistance consists of an interest free loan of 150 million RMB (about 12.5 billion CFA francs) (ID# 30849) and a grant of 50 million RMB yuan (4.16 billion CFA francs) (ID #30850).	998	Unallocated / Unspecified		Pipeline: Commitment	11	Loan (excluding debt rescheduling)	Benin	http://global.factiva.com/aa/?ref=XHFRNS0020131115e9bf0038p&pp=1&fcpil=en&napc=S&sa_from=, Media Report, including Wikileaks; http://english.mofcom.gov.cn/article/newsrelease/press/201309/20130900285772.shtml, Government Source (Donor/Recipient)	2							Checked	1	ODA-like	2	Development	1	Active	1	http://global.factiva.com/aa/?ref=XHFRNS0020131115e9bf0038p&pp=1&fcpil=en&napc=S&sa_from=, Media Report, including Wikileaks	150000000	CNY	1.09	6.195	2.22138e+07	1.13667	2.52499e+07						1	Benin	434	236	Benin	BEN	BJ	204
30850	China	Grant for Economic Development	2013	FALSE	On November 15, 2013, the Chinese government granted Benin financial assistance of 200 million RMB yuan (over 16 billion CFA francs) to finance projects of existing cooperation between the two countries. The financial assistance consists of an interest free loan of 150 million RMB (about 12.5 billion CFA francs) (ID# 30849) and a grant of 50 million RMB yuan (4.16 billion CFA francs) (ID #30850).	998	Unallocated / Unspecified	Vague, little specification beyond 'development projects'	Pipeline: Commitment	11	Grant	Benin	http://global.factiva.com/aa/?ref=XHFRNS0020131115e9bf0038p&pp=1&fcpil=en&napc=S&sa_from=, Media Report, including Wikileaks	1							Checked	1	ODA-like	2	Development	1	Active	1	http://global.factiva.com/aa/?ref=XHFRNS0020131115e9bf0038p&pp=1&fcpil=en&napc=S&sa_from=, Media Report, including Wikileaks	50000000	CNY	1.09	6.195	7.40461e+06	1.13667	8.41662e+06						1	Benin	434	236	Benin	BEN	BJ	204
30835	China	Loan for Drinking Water	2013	FALSE	In September 2013, it is reported that the Export-Import Bank of China will lend Benin $42 million to finance the supply of drinking water in 69 villages in the West African country. The loan means the country will be able to supply drinking water to 67 percent of the population, as required by the Millennium Development Goals.	140	Water Supply and Sanitation		Pipeline: Commitment	11	Loan (excluding debt rescheduling)	Benin	http://global.factiva.com/aa/?ref=CHNDLY0020130917e99i00018&pp=1&fcpil=en&napc=S&sa_from=, Media Report, including Wikileaks; http://www.bloomberg.com/news/2013-09-17/benin-gets-42-million-water-loan-from-china-s-exim-bank.html, Media Report, including Wikileaks	2	Export-Import Bank of China, Government Agency		Export-Import Bank of China, Government Agency	1			Checked	1	Vague (Official Finance)	5	Development	1	Active	1	http://global.factiva.com/aa/?ref=CHNDLY0020130917e99i00018&pp=1&fcpil=en&napc=S&sa_from=, Media Report, including Wikileaks	42000000	USD	1.09	1	3.85321e+07	1.13667	4.37984e+07						1	Benin	434	236	Benin	BEN	BJ	204
30836	China	Loan for Fiber Optic Network	2013	FALSE	In September 2013, China's Exim bank approved the financial package for the $80 million deployment of a fibre-optic network in Benin. The contract that was awarded to China's Huawei Technologies at the beginning of this year is designed to improve access to broadband in Benin, bringing it to 77 districts.	220	Communications		Pipeline: Commitment	11	Loan (excluding debt rescheduling)	Benin	http://global.factiva.com/aa/?ref=WAFLET0020131004e99i0000d&pp=1&fcpil=en&napc=S&sa_from=, Media Report, including Wikileaks	1	Export-Import Bank of China, Government Agency	Huawei Technologies Co., Ltd., Private Sector	Export-Import Bank of China, Government Agency; Huawei Technologies Co., Ltd., Private Sector	2			Checked	1	Vague (Official Finance)	5	Mixed (Some Development)	6	Active	1	http://global.factiva.com/aa/?ref=WAFLET0020131004e99i0000d&pp=1&fcpil=en&napc=S&sa_from=, Media Report, including Wikileaks	80000000	USD	1.09	1	7.33945e+07	1.13667	8.34256e+07						1	Benin	434	236	Benin	BEN	BJ	204
30834	China	Preferential Loan for Road Rehabilitation	2013	FALSE	China gave Benin a preferential loan of 130 million U. S. dollars to fund the rehabilitation of a road linking the towns of Akassato and Bohicon in August 2013. Measuring 140 km, the Akassato-Bohicon road is of a regional nature, because it does not only link West Africa to Central Africa, but also Benin to hinterland countries like Niger and Burkina Faso.	210	Transport and Storage		Implementation	2	Loan (excluding debt rescheduling)	Benin	http://global.factiva.com/aa/?ref=XNEWS00020130827e98r003jt&pp=1&fcpil=en&napc=S&sa_from=, Media Report, including Wikileaks; http://www.thefreelibrary.com/China+%3A+CHINA+gives+preferential+loan+of+US$130+million+to+BENIN.-a0341135621, Media Report, including Wikileaks	2							Checked	1	Vague (Official Finance)	5	Development	1	Active	1	http://global.factiva.com/aa/?ref=XNEWS00020130827e98r003jt&pp=1&fcpil=en&napc=S&sa_from=, Media Report, including Wikileaks	130000000	USD	1.09	1	119266055	1.13667	1.35567e+08						1	Benin	434	236	Benin	BEN	BJ	204
30846	China	Financing 100 Large-Diameter Water Wells	2013	FALSE	On January 5, 2013, Benin President Boni Yayi process Gbï¿½dagbo attended the groundbreaking ceremony for the drilling of 100 wells in Atlantique, Borgou, Mono, Ouï¿½mï¿½, Atakora and Alibori. The total cost of the wells is 1 billion CFA francs (2 million USD), donated by the Chinese government. The handover ceremony for the wells was held on January 8, 2014.	140	Water Supply and Sanitation		Completion	3	Grant	Benin	http://global.factiva.com/aa/?ref=XHFRNS0020130105e9150048t&pp=1&fcpil=en&napc=S&sa_from=, Media Report, including Wikileaks; http://www.chinageo.com.cn/g1360/s4064/t2743.aspx, Implementing/Intermediary Agency Source; http://www.cecep.cn/g1360/s4064/t21360.aspx, Implementing/Intermediary Agency Source; http://bj.mofcom.gov.cn/article/todayheader/201401/20140100458941.shtml, Media Report, includin…	5		China Geo-Engineering Corporation, State-Owned Company	China Geo-Engineering Corporation, State-Owned Company	1			Checked	1	ODA-like	2	Development	1	Active	1	http://global.factiva.com/aa/?ref=XHFRNS0020130105e9150048t&pp=1&fcpil=en&napc=S&sa_from=, Media Report, including Wikileaks	1000000000	XOF	1.09	615.66	1.49016e+06	1.13667	1.69382e+06						1	Benin	434	236	Benin	BEN	BJ	204
30833	China	Construction of Twin Administrative Towers in Cotonou	2013	FALSE	On July 31, 2013, Benin's President Boni Yayi and Chinese Ambassador to Benin Tao Wiguang inaugurated the Cotonou Administrative Towers, a project of 15.6 billion FCFA (31.2 million USD), entirely funded by China Exim Bank, the twin towers of nine floors and 582 offices are erected in a public place facing the building housing Benin's Foreign Ministry, African Integration and the Francophonie.	150	Government and Civil Society		Completion	3	Loan (excluding debt rescheduling)	Benin	http://global.factiva.com/aa/?ref=XNEWS00020130801e9810035z&pp=1&fcpil=en&napc=S&sa_from=, Media Report, including Wikileaks	1	Export-Import Bank of China, Government Agency		Export-Import Bank of China, Government Agency	1			Checked	1	Vague (Official Finance)	5	Development	1	Active	1	http://global.factiva.com/aa/?ref=XNEWS00020130801e9810035z&pp=1&fcpil=en&napc=S&sa_from=, Media Report, including Wikileaks	15600000000	XOF	1.09	615.66	2.32465e+07	1.13667	2.64237e+07				2013-07-31		1	Benin	434	236	Benin	BEN	BJ	204
30848	China	Two Sweepers Donated	2013	FALSE	On April 13, 2013, A Chinese delegation of the municipality of the city of Ningbo in Zhejiang Province in China, led by its Deputy Mayor Hong Jiaxiang, donated two sweepers to city ??of Cotonou, for development of sanitation in the city of Cotonou.	160	Other Social infrastructure and services		Completion	3	Grant	Benin	http://global.factiva.com/aa/?ref=XHFRNS0020130413e94d001jl&pp=1&fcpil=en&napc=S&sa_from=, Media Report, including Wikileaks; http://bj.china-embassy.org/chn/sghd/t1031318.htm, Government Source (Donor/Recipient)	2							Checked	1	ODA-like	2	Development	1	Active	1	http://global.factiva.com/aa/?ref=XHFRNS0020130413e94d001jl&pp=1&fcpil=en&napc=S&sa_from=, Media Report, including Wikileaks						1.13667	0						1	Benin	434	236	Benin	BEN	BJ	204
30847	China	Funding Construction of Technical School	2013	FALSE	On January 6, 2013, Benin President Boni Yayi attended the ceremony of laying the foundation stone for the construction of the Sino-Beninese friendship technical school that will strengthen technical and vocational training. The school will be built on an area of ??an area of ??32,488 square meters and will be built on an area of ??8165 square meters to accommodate 450 students, and it is fully f…	110	Education		Implementation	2	Vague TBD	Benin	http://global.factiva.com/aa/?ref=XHFRNS0020130107e91700003&pp=1&fcpil=en&napc=S&sa_from=, Media Report, including Wikileaks; http://news.hexun.com/2013-01-07/149842441.html, Media Report, including Wikileaks; http://www.gouv.bj/actualites/marina/visite-du-chantier-du-lycee-technique-damitie-sino-beninoise-dabomey-calaviboni-yayi-simpregne-de-levolution-des-travaux, Media Report, including Wikile…	3							Checked	1	Vague (Official Finance)	5	Development	1	Active	1	http://global.factiva.com/aa/?ref=XHFRNS0020130107e91700003&pp=1&fcpil=en&napc=S&sa_from=, Media Report, including Wikileaks						1.13667	0						1	Benin	434	236	Benin	BEN	BJ	204
35661	China	China sends 16th medical team to Benin	2010	FALSE	China has been sending medical teams to Benin every 2 years since 1978. China orginally signed the agreement to send medical teams to Benin in 1976. Ningxia province is responsible for sending the teams. The 16th medical team is comprised of 27 members. The team worked at Natitingou, Kandi, Lokossa and Cotonou from 2010 to 2011. In October 2011, five members of the 16th medical team were awarded …	120	Health		Completion	3	Free-standing technical assistance	Benin	http://www.nhfpc.gov.cn/gjhzs/dyhbz/201308/eba286dab76f46e9b182c878452c95ce.shtml, Government Source (Donor/Recipient); http://bj.mofcom.gov.cn/article/ddfg/201110/20111007786789.shtml, Government Source (Donor/Recipient)	2							Checked	1	ODA-like	2	Development	1	Active	1							1.13667	0						1	Benin	434	236	Benin	BEN	BJ	204
45	China	Benin's Biofuel Joint Venture	2010	FALSE	In 2010, the China Africa Development Fund agreed to buy the additional shares and convertible bonds to be issued by Hong Kong-listed Hua Lien International (Holding) Co. Ltd at an aggregate HK$390 million. The two parties signed an MoU in 2010. Under the MOU, the firm will sell 90 million additional shares at HK$0.6 apiece, representing HK$54 million in total consideration. It will also sell to …	230	Energy Generation and Supply		Pipeline: Commitment	11	Joint venture with recipient	Benin	http://global.factiva.com/aa/?ref=GCPERD0020100203e62300009&pp=1&fcpil=en&napc=S&sa_from=, Media Report, including Wikileaks	1	Hua Lien International Holding Co., Ltd., State-Owned Company; China-Africa Development Fund, Public Private Partnership	International Sugar Industry Co. Ltd, Private Sector	International Sugar Industry Co. Ltd, Private Sector; Hua Lien International Holding Co., Ltd., State-Owned Company; China-Africa Development Fund, Public Private Partnership	3			Checked	1	Official Investment	14	Commercial	2	Active	1	http://global.factiva.com/aa/?ref=GCPERD0020100203e62300009&pp=1&fcpil=en&napc=S&sa_from=, Media Report, including Wikileaks						1.13667	0						1	Benin	434	236	Benin	BEN	BJ	204
31312	China	Confucius Institute at University of Abomey-Calavi	2009	FALSE	The agreement establishing the Confucius Institute was signed between Abomey Calavi University (UAC) and HANBAN on January 15th 2009. The agreement was a partnership with Chongqing Jiaotong University (CQJTU). Academic activities began October 21st 2009. Under the agreement, Chongqing Jiaotong University was to provide technical assistance to the institute as well as one or two Chinese teachers a…	110	Education		Completion	3	Grant	Benin	http://english.hanban.org/confuciousinstitutes/node_10954.htm, Government Source (Donor/Recipient); http://www.hanban.edu.cn/report/pdf/2009_final.pdf, Implementing/Intermediary Agency Source; http://news.xinhuanet.com/english/2009-03/26/content_11078819.htm, Media Report, including Wikileaks	3		Confucius Institute, Government Agency	Confucius Institute, Government Agency	1			Checked	1	OOF-like	3	Representational	3	Active	1							1.13667	0		2009-01-15		2009-10-21		1	Benin	434	236	Benin	BEN	BJ	204
34144	China	Construction of Hospital in Parakou	2009	FALSE	In January 2009, a foundation-laying ceremony was held for the 100-bed hospital in Parakou. Construction started in April 2009 and finished in June 2010. The hospital was officially inaugurated in February 2011. The cost of the hospital was 6 billion FCFA, which amounts to 12 million USD. The modern hospital, with a capacity of 100 beds, will have services including pediatrics, obstetrics, gyneco…	120	Health		Completion	3	Grant	Benin	http://www.focac.org/eng/zxxx/t800568.htm, Media Report, including Wikileaks; http://www.giga-hamburg.de/en/system/files/publications/wp140_kohnert.pdf, Other Academic (Working Paper, Dissertation); http://www.globaltimes.cn/content/800799.shtml, Media Report, including Wikileaks; http://www.crecg.com/tabid/461/InfoID/13495/frtid/382/Default.aspx, Implementing/Intermediary Agency Source; http://g…	7		China Railway Group Co., Ltd., State-Owned Company	China Railway Group Co., Ltd., State-Owned Company	1			Checked	1	Vague (Official Finance)	5	Development	1	Active	1							1.13667	0						1	Benin	434	236	Benin	BEN	BJ	204
35660	China	China sends 15th medical team to Benin	2008	FALSE	China has been sending medical teams to Benin every 2 years since 1978. China orginally signed the agreement to send medical teams to Benin in 1976. Ningxia province is responsible for sending the teams. The 15th medical team is comprised of 26 members. The team worked at Natitingou, Kandi, Lokossa and Cotonou from 2008 to 2009. In October 2009, four members of the 15th medical team were awarded …	120	Health		Completion	3	Free-standing technical assistance	Benin	http://www.nhfpc.gov.cn/gjhzs/dyhbz/201308/eba286dab76f46e9b182c878452c95ce.shtml, Government Source (Donor/Recipient); http://finance.sina.com.cn/roll/20091030/04586902832.shtml, Media Report, including Wikileaks	2							Checked	1	ODA-like	2	Development	1	Active	1							1.13667	0						1	Benin	434	236	Benin	BEN	BJ	204
31728	China	Construction of Agricultural Demonstration Center	2008	TRUE	In 2009, an agricultural demonstration center in Benin was in the midst of being constructed by the China National Agricultural Development Group. This center was to focus on corn and vegetables. Groundbreaking ceremony was held on March 31, 2009. This is one of 17 agricultural demonstration centers being funded by China in Africa. Each center involved an initial investment of 5-6 million USD.	310	Agriculture, Forestry and Fishing		Implementation	2	Free-standing technical assistance	Benin	http://www.iprcc.org/userfiles/file/Li%20Jiali-EN.pdf, Government Source (Donor/Recipient); http://jjhzj.mofcom.gov.cn/article/y/201104/20110407510419.shtml, Government Source (Donor/Recipient); http://jjhzj.mofcom.gov.cn/article/y/200904/20090406162169.shtml, Government Source (Donor/Recipient); http://www.ccs.org.za/wp-content/uploads/2014/09/Rex_PhanW_Report_Final_Rex_2014.pdf, Academic Journa…	6		China National Agricultural Development Group, State-Owned Company	China National Agricultural Development Group, State-Owned Company	1			Checked	1	ODA-like	2	Development	1	Active	1		40000000	CNY	0.988996	6.94865	5.82056e+06	1.13667	6.61608e+06	5.75651e+06					1	Benin	434	236	Benin	BEN	BJ	204
117	China	An overpass project in Cotonou	2008	FALSE	(PPIAF) In 2008, the Chinese government provided a grant to construct an overpass in Cotonou with a total investment of 160 million Yuan. Construction commenced in August 2008, and the project ultimately cost $22.88984263 million USD. The overpass is 5km long. It is unclear if the project was completed. PPIAF-ID:41 Possibly connected to ID #43.	210	Transport and Storage	Transport; Bridge	Implementation	2	Grant	Benin	http://news.cctv.com/china/20080827/102146.shtml, Media Report, including Wikileaks; http://www.gouv.bj/grands-chantiers/echangeurs-routiers, Other	2		China Railway Construction Corporation (CRCC), State-Owned Company	China Railway Construction Corporation (CRCC), State-Owned Company	1			Checked	1	ODA-like	2	Development	1	Active	1		2.28898e+07	USD	0.988996	1	2.31445e+07	1.13667	2.63078e+07	2.28898e+07	2008-08-01				1	Benin	434	236	Benin	BEN	BJ	204
34169	China	Construction of Anti-Malaria Center in Benin	2008	FALSE	A 2011 Working Series report confirms Chinese funding for the construction of an anti-malaria center in Benin. The official opening ceremony was held on November 10, 2008. Although specific funding amounts are not listed, the report is corroborated by Chinese ministry articles and ambassadorial statements.	120	Health		Completion	3	Grant	Benin	http://nai.diva-portal.org/smash/get/diva2:399727/FULLTEXT02, Other Academic (Working Paper, Dissertation); http://bj.mofcom.gov.cn/aarticle/ddfg/200811/20081105883291.html, Government Source (Donor/Recipient); http://www.thelancet.com/journals/lancet/article/PIIS0140-6736(14)60725-X/fulltext#article_upsell, Academic Journal Article	3							Checked	1	ODA-like	2	Development	1	Active	1							1.13667	0						1	Benin	434	236	Benin	BEN	BJ	204
43	China	Cooperation Pact and Aid	2008	FALSE	China and Benin signed in 2008 in Cotonou, the capital of Benin, an agreement on economic and technological cooperation. Chinese Ambassador to Benin Geng Wenbin and Benin's Minister of Foreign Affairs Jean Marie Ehouzou signed the agreement on behalf of each other's government. According to the agreement, China will provide Benin with 40 million CNY (5.98 million U.S. dollars) worth of aid. One r…	998	Unallocated / Unspecified		Pipeline: Commitment	11	Grant	Benin	http://global.factiva.com/aa/?ref=XNEWS00020090326e53q001xh&pp=1&fcpil=en&napc=S&sa_from=, Media Report, including Wikileaks; http://global.factiva.com/aa/?ref=XNHA000020081231e4cv000ji&pp=1&fcpil=en&napc=S&sa_from=, Media Report, including Wikileaks; http://www.suprememastertv.com/nwn/?wr_id=529&url=link1_0&page=36, NGO/Civil Society/Advocacy	3							Checked	1	ODA-like	2	Development	1	Active	1	http://global.factiva.com/aa/?ref=XNEWS00020090326e53q001xh&pp=1&fcpil=en&napc=S&sa_from=, Media Report, including Wikileaks; http://global.factiva.com/aa/?ref=XNHA000020081231e4cv000ji&pp=1&fcpil=en&napc=S&sa_from=, Media Report, including Wikileaks	40000000	CNY	0.988996	6.94865	5.82056e+06	1.13667	6.61608e+06	5.75651e+06		2008-12-30		2009-03-26	1	Benin	434	236	Benin	BEN	BJ	204
26	China	China provides 30 million yuan loan to Benin	2007	FALSE	On December 21, 2006, China and Benin agreed on an interest-free loan to the African country worth 30 million yuan (2.9 million euros, 3.8 million dollars). It is unclear how the funds were used. Li Zhaoxing, China's Foreign Minister, was present at the signing on January 1 2007. The project was likely untied. This project is affiliated with the Chinese writing off a sum of Benin's debt and anoth…	998	Unallocated / Unspecified		Pipeline: Commitment	11	Loan (excluding debt rescheduling)	Benin	http://www.channelnewsasia.com/stories/afp_world_business/view/250195/1/.html, Media Report, including Wikileaks; http://news.sohu.com/20070104/n247415718.shtml, Media Report, including Wikileaks; http://www.sudantribune.com/spip.php?article19538, Media Report, including Wikileaks; http://global.factiva.com/aa/?ref=AFPR000020061231e2cv009n9&pp=1&fcpil=en&napc=S&sa_from=, Media Report, including W…	4							Checked	1	ODA-like	2	Development	1	Active	1	http://global.factiva.com/aa/?ref=AFPR000020061231e2cv009n9&pp=1&fcpil=en&napc=S&sa_from=, Media Report, including Wikileaks	30000000	CNY	0.837995	7.60753	4.70583e+06	1.13667	5.34899e+06	3.94346e+06		2006-12-31	2007-01-01	2006-12-31	1	Benin	434	236	Benin	BEN	BJ	204
7	China	Economic and Trade Development Center	2007	FALSE	In 2007, Li Zhaoxing, Chinese Foreign Minister, went on a 7-nation tour, stopping in Benin to sign a variety of agreements and attend the launching ceremony of a new Chinese trade and economic development center in Benin. In 2008, construction began on Benin's Chinese Economy and Trade Development Center, a national-level aid project from the Chinese government. The center is located in Cotonou's…	330	Trade and Tourism		Completion	3	Grant	Benin	http://www.zcom.gov.cn/zcomenglish/Policies%20Regulations/Finance%20Foreign%20Exchange/T238845.html, Government Source (Donor/Recipient); http://www.chinaconsulatesf.org/eng/xw/t287492.htm, Government Source (Donor/Recipient); http://global.factiva.com/aa/?ref=BJEIND0020080505e4550001l&pp=1&fcpil=en&napc=S&sa_from=, Media Report, including Wikileaks	3		Zhejiang Tianshi International Economic and Technical Cooperation Co., Ltd., Private Sector	Zhejiang Tianshi International Economic and Technical Cooperation Co., Ltd., Private Sector	1			Checked	1	OOF-like	3	Mixed (Some Development)	6	Active	1	http://global.factiva.com/aa/?ref=BJEIND0020080505e4550001l&pp=1&fcpil=en&napc=S&sa_from=, Media Report, including Wikileaks	50000000	CNY	0.837995	7.60753	7.84305e+06	1.13667	8.91498e+06	6.57243e+06		2008-05-08	2009-12-16		1	Benin	434	236	Benin	BEN	BJ	204
24	China	Debt Relief	2006	FALSE	In 2006, China granted Benin debt relief, but it is unclear how much.	600	Action Relating to Debt		Completion	3	Debt forgiveness	Benin	http://www.china.org.cn/english/international/195198.htm, Implementing/Intermediary Agency Source; http://global.factiva.com/aa/?ref=OANA000020070106e316000p6&pp=1&fcpil=en&napc=S&sa_from=, Media Report, including Wikileaks; http://global.factiva.com/aa/?ref=AFPR000020061231e2cv009n9&pp=1&fcpil=en&napc=S&sa_from=, Media Report, including Wikileaks; http://news.xinhuanet.com/english/china/2014-07/…	4							Checked	1	ODA-like	2	Development	1	Active	1	http://global.factiva.com/aa/?ref=OANA000020070106e316000p6&pp=1&fcpil=en&napc=S&sa_from=, Media Report, including Wikileaks; http://global.factiva.com/aa/?ref=AFPR000020061231e2cv009n9&pp=1&fcpil=en&napc=S&sa_from=, Media Report, including Wikileaks						1.13667	0			2006-12-31		2006-12-31	1	Benin	434	236	Benin	BEN	BJ	204
35658	China	China's Ningxia province sends 14th medical team to Benin	2006	FALSE	China has been sending medical teams to Benin every 2 years since 1978. China orginally signed the agreement to send medical teams to Benin in 1976. Ningxia province is responsible for sending the teams. The 14th medical team is comprised of 26 members. The team worked at Natitingou, Kandi, Lokossa and Cotonou from 2006 to 2007.	120	Health		Completion	3	Free-standing technical assistance	Benin	http://www.nhfpc.gov.cn/gjhzs/dyhbz/201308/eba286dab76f46e9b182c878452c95ce.shtml, Government Source (Donor/Recipient)	1							Checked	1	ODA-like	2	Development	1	Active	1							1.13667	0						1	Benin	434	236	Benin	BEN	BJ	204
28	China	Administrative Structure Aid	2006	FALSE	In 2006, China agreed to provide financial aid for Benin's administrative structure. It is unclear what the total value of the project is, and what the details of the project are. The project is affiliated with agreements on debt forgiveness, a 30 million Yuan loan, and others. (ID#24, ID#26, ID#11699).	150	Government and Civil Society		Pipeline: Pledge	12	Grant	Benin	http://news.sohu.com/20070104/n247415718.shtml, Media Report, including Wikileaks; http://www.sudantribune.com/spip.php?article19538, Media Report, including Wikileaks; http://global.factiva.com/aa/?ref=AFPR000020061231e2cv009n9&pp=1&fcpil=en&napc=S&sa_from=, Media Report, including Wikileaks	3		Benin Ministry of Foreign Affairs, Government Agency			Benin Ministry of Foreign Affairs, Government Agency	1	Checked	1	ODA-like	2	Development	1	Active	1	http://global.factiva.com/aa/?ref=AFPR000020061231e2cv009n9&pp=1&fcpil=en&napc=S&sa_from=, Media Report, including Wikileaks						1.13667	0			2006-12-31		2007-01-01	1	Benin	434	236	Benin	BEN	BJ	204
32	China	Training and Education	2005	FALSE	In 2005, up to 92 Beninese people went to China and began to be trained there. It is unclear what they were studying or if they returned home.	110	Education		Implementation	2	Scholarships/training in the donor country	Benin	http://english.peopledaily.com.cn/200604/03/eng20060403_255519.html, Media Report, including Wikileaks	1							Checked	1	ODA-like	2	Development	1	Active	1							1.13667	0			2005-01-01		2006-04-03	1	Benin	434	236	Benin	BEN	BJ	204
35657	China	China's Ningxia province sends 13th medical team to Benin	2004	FALSE	China has been sending medical teams to Benin every 2 years since 1978. China orginally signed the agreement to send medical teams to Benin in 1976. Ningxia province is responsible for sending the teams. The 13th medical team is comprised of 26 members. The team worked at Natitingou, Kandi, Lokossa and Cotonou from 2004 to 2005.	120	Health		Completion	3	Free-standing technical assistance	Benin	http://www.nhfpc.gov.cn/gjhzs/dyhbz/201308/eba286dab76f46e9b182c878452c95ce.shtml, Government Source (Donor/Recipient); http://www.nhfpc.gov.cn/gjhzs/dyhbz/201308/eba286dab76f46e9b182c878452c95ce.shtml, Government Source (Donor/Recipient)	2							Checked	1	ODA-like	2	Development	1	Active	1							1.13667	0						1	Benin	434	236	Benin	BEN	BJ	204
35656	China	China's Ningxia Province sends 12th medical team to Benin	2002	FALSE	China has been sending medical teams to Benin every 2 years since 1978. China orginally signed the agreement to send medical teams to Benin in 1976. Ningxia province is responsible for sending the teams. The 12th medical team is comprised of 26 members. The team worked at Natitingou, Kandi, Lokossa and Cotonou from 2002 to 2003.	120	Health		Completion	3	Free-standing technical assistance	Benin	http://www.nhfpc.gov.cn/gjhzs/dyhbz/201308/eba286dab76f46e9b182c878452c95ce.shtml, Government Source (Donor/Recipient)	1							Checked	1	ODA-like	2	Development	1	Active	1							1.13667	0						1	Benin	434	236	Benin	BEN	BJ	204
18	China	Preferential loan for cotton mill	2000	FALSE	In March 2000, the Export-Import Bank of China approved a preferential loan worth 76.5 million CNY to finance a cotton mill in Benin. The factory is expecting to ease a growing shortage of cotton textiles in central and western Africa. The loan was the second batch under a 150 million CNY preferential lending package signed between the governments of the two countries in 1998.	320	Industry, Mining, Construction		Pipeline: Commitment	11	Loan (excluding debt rescheduling)	Benin	http://global.factiva.com/aa/?ref=aprt000020010803dw3o001nr&pp=1&fcpil=en&napc=S&sa_from=, Media Report, including Wikileaks; http://global.factiva.com/aa/?ref=aprt000020010803dw3l001ib&pp=1&fcpil=en&napc=S&sa_from=, Media Report, including Wikileaks	2	Export-Import Bank of China, Government Agency		Export-Import Bank of China, Government Agency	1			Checked	1	Vague (Official Finance)	5	Development	1	Active	1	http://global.factiva.com/aa/?ref=aprt000020010803dw3o001nr&pp=1&fcpil=en&napc=S&sa_from=, Media Report, including Wikileaks; http://global.factiva.com/aa/?ref=aprt000020010803dw3l001ib&pp=1&fcpil=en&napc=S&sa_from=, Media Report, including Wikileaks	76500000	CNY	0.58919	8.2785	1.56839e+07	1.13667	1.78275e+07	9.2408e+06		2000-03-21			1	Benin	434	236	Benin	BEN	BJ	204
30083	China	MoU on agricultural equipment and training	2012	FALSE	On March 31, 2012, the Chinese vice Minister of Agriculture, Niu Dun has promised Botswana s Minister of Agriculture Christian De Graaf that China is prepared to make investments in the segments of agricultural tools to aid enhance productivity of foodstuff. In a meeting with Christian De Graaf, Niu Dun promised to help Botswana improve its agricultural production by providing new farm equipment …	310	Agriculture, Forestry and Fishing		Pipeline: Pledge	12	Grant	Botswana	http://global.factiva.com/aa/?ref=TMRAGL0020120403e8420000d&pp=1&fcpil=en&napc=S&sa_from=, Media Report, including Wikileaks; http://global.factiva.com/aa/?ref=MENREP0020120331e83v0000b&pp=1&fcpil=en&napc=S&sa_from=, Media Report, including Wikileaks; http://global.factiva.com/aa/?ref=BBCAP00020120420e84k002jp&pp=1&fcpil=en&napc=S&sa_from=, Media Report, including Wikileaks; http://www.thefreelib…	5		China Ministry of Agriculture, Government Agency	China Ministry of Agriculture, Government Agency	1			Checked	1	ODA-like	2	Development	1	Active	1	http://global.factiva.com/aa/?ref=TMRAGL0020120403e8420000d&pp=1&fcpil=en&napc=S&sa_from=, Media Report, including Wikileaks; http://global.factiva.com/aa/?ref=MENREP0020120331e83v0000b&pp=1&fcpil=en&napc=S&sa_from=, Media Report, including Wikileaks; http://global.factiva.com/aa/?ref=BBCAP00020120420e84k002jp&pp=1&fcpil=en&napc=S&sa_from=, Media Report, including Wikileaks						1.13667	0						1	Botswana	571	227	Botswana	BWA	BW	72
30128	China	Chinese Governmental Scholarship 2012/2013	2012	FALSE	22 Botswana students won the Chinese Governmental Scholarship for the 2012-2013 academic year. The scholarships are given to students pursing bachelor, master or doctorate degrees in a variety of academic fields.	110	Education		Completion	3	Scholarships/training in the donor country	Botswana	http://www.mmegi.bw/index.php?sid=1&aid=241&dir=2012/January/Tuesday31, Media Report, including Wikileaks; http://bw.china-embassy.org/eng/xwdt/t953441.htm, Government Source (Donor/Recipient); http://www.dailynews.gov.bw/news-details.php?nid=1581, Government Source (Donor/Recipient)	3							Checked	1	ODA-like	2	Development	1	Active	1							1.13667	0						1	Botswana	571	227	Botswana	BWA	BW	72
30843	China	China provides ophthalmologists for cataract operations in Botswana	2011	FALSE	From June 27 to July 1, 2011, a team of ophthalmologists from China successfully performed about 200 cataract operations as part of the 'Hope of Light Cataract Project.' (ID #30843) Botswana also received a donation of ophthalmic equipment and consumables worth BWP1,492,488 ($172,382) from China during the same period (ID #30844). STAFF_NOTE: Possibly related to ID #306	120	Health	Public health-ophthalmology	Completion	3	Free-standing technical assistance	Botswana	http://global.factiva.com/aa/?ref=BCHAFR0020130827e98100001&pp=1&fcpil=en&napc=S&sa_from=, Media Report, including Wikileaks; http://bw.china-embassy.org/eng/xwdt/t872819.htm, Government Source (Donor/Recipient)	2							Checked	1	ODA-like	2	Development	1	Active	1	http://global.factiva.com/aa/?ref=BCHAFR0020130827e98100001&pp=1&fcpil=en&napc=S&sa_from=, Media Report, including Wikileaks						1.13667	0		2011-06-27		2011-07-01		1	Botswana	571	227	Botswana	BWA	BW	72
34927	China	China sends 13th medical team to Botswana	2011	TRUE	China has been sending medical teams to Botswana since 1981. China originally signed the agreement to send medical teams to Botswana in 1981. Fujian province is responsible for sending the teams. The 13th medical team is comprised of 46 members. On October 28, 2011 China and Botswana signed a protocol agreement on the 13th China Medical team in Gaborone. Speaking during the signing ceremony, Bots…	120	Health		Completion	3	Free-standing technical assistance	Botswana	http://www.gov.cn/gzdt/2012-03/03/content_2081849.htm, Government Source (Donor/Recipient); http://www.thelancet.com/journals/lancet/article/PIIS0140-6736(14)60725-X/fulltext#article_upsell, Academic Journal Article; http://bw.china-embassy.org/eng/xwdt/t872819.htm, Government Source (Donor/Recipient); http://www.sundaystandard.info/article.php?NewsID=12669&GroupID=2, Media Report, including Wiki…	8							Checked	1	ODA-like	2	Development	1	Active	1	http://global.factiva.com/aa/?ref=BBCAPP0020111029e7at000rt&pp=1&fcpil=en&napc=S&sa_from=, Media Report, including Wikileaks	140000	BWP	1.20634	6.83824	16971.2	1.13667	19290.7	20473.1					1	Botswana	571	227	Botswana	BWA	BW	72
30844	China	Chinese Medical Aid in Botswana Part 2 (Donation of ophthalmic equipment)	2011	FALSE	From June 27 to July 1, 2011, a team of ophthalmologists from China successfully performed about 200 cataract operations as part of the 'Hope of Light Cataract Project.' (ID #30843) Botswana also received a donation of ophthalmic equipment and consumables worth BWP1,492,488 ($172,382) from China during the same period (ID #30844). STAFF_NOTE: Possibly related to ID #306	120	Health	Public health-ophthalmic equipment	Completion	3	Grant	Botswana	http://global.factiva.com/aa/?ref=BCHAFR0020130827e98100001&pp=1&fcpil=en&napc=S&sa_from=, Media Report, including Wikileaks	1							Checked	1	ODA-like	2	Development	1	Active	1	http://global.factiva.com/aa/?ref=BCHAFR0020130827e98100001&pp=1&fcpil=en&napc=S&sa_from=, Media Report, including Wikileaks	1492488	BWP	1.20634	6.83824	180924	1.13667	205651	218256	2011-06-27		2011-07-01		1	Botswana	571	227	Botswana	BWA	BW	72
30132	China	Computer donation to schools	2011	FALSE	Around April 2011, the Chinese Embassy donated three computers to schools in the Tonota North constituency of Botswana, costing 6,000 BWP for each computer. STAFF_NOTE: Only able to find one source verifying this project.	110	Education		Completion	3	Grant	Botswana	http://bw.china-embassy.org/eng/xwdt/t851533.htm, Government Source (Donor/Recipient)	1							Checked	1	ODA-like	2	Development	1	Active	1		18000	BWP	1.20634	6.83824	2182.01	1.13667	2480.23	2632.26					1	Botswana	571	227	Botswana	BWA	BW	72
30127	China	Chinese Governmental Scholarship 2011-2012	2011	FALSE	21 Botswana students won the Chinese Governmental Scholarship for the 2011-2012 academic year. The scholarships were given to students pursing bachelor, master and doctorate degrees in a variety of academic fields.	110	Education		Completion	3	Scholarships/training in the donor country	Botswana	http://bw.china-embassy.org/eng/wjkj/t842907.htm, Government Source (Donor/Recipient)	1							Checked	1	ODA-like	2	Development	1	Active	1							1.13667	0						1	Botswana	571	227	Botswana	BWA	BW	72
303	China	Economic Assistance	2010	FALSE	On November 21, 2010 China and Botswana signed an Economic and Technical Cooperation Agreement. Under the Agreement China is to provide assistance worth 40 million RMB to the Botswana.	998	Unallocated / Unspecified		Pipeline: Commitment	11	Grant	Botswana	http://vlex.cn/vid/roundup-vice-president-trip-achieves-goals-230786199, Media Report, including Wikileaks; http://news.xinhuanet.com/english2010/china/2010-11/21/c_13615942.htm, Media Report, including Wikileaks	2							Checked	1	ODA-like	2	Development	1	Active	1		40000000	CNY	1.07564	6.77027	5.4927e+06	1.13667	6.24341e+06	5.90818e+06					1	Botswana	571	227	Botswana	BWA	BW	72
301	China	Chinese Governmental Scholarship 2010/2011	2010	FALSE	A report issued by the Chinese Embassy in Botswana in 2010 stated that 28 Botswana students had received the Chinese Governmental Scholarship for the 2010/2011 Academic Year to study in China.	110	Education		Implementation	2	Scholarships/training in the donor country	Botswana	http://bw.china-embassy.org/eng/wjkj/scholarship/t720180.htm, Government Source (Donor/Recipient); http://global.factiva.com/aa/?ref=XNHA000020101119e6bj001qd&pp=1&fcpil=en&napc=S&sa_from=, Media Report, including Wikileaks	2							Checked	1	ODA-like	2	Development	1	Active	1	http://global.factiva.com/aa/?ref=XNHA000020101119e6bj001qd&pp=1&fcpil=en&napc=S&sa_from=, Media Report, including Wikileaks						1.13667	0						1	Botswana	571	227	Botswana	BWA	BW	72
39	China	Agricultural Experts	2009	FALSE	In 2009, the Chinese government dispatched 3 senior experts in the field of agriculture economy, agriculture equipment and irrigation to provide technical assistance to Botswana and enhance the bilateral cooperation.	310	Agriculture, Forestry and Fishing		Completion	3	Free-standing technical assistance	Botswana	http://www.sundaystandard.info/article.php?NewsID=9639&GroupID=2, Media Report, including Wikileaks; http://global.factiva.com/aa/?ref=AFNWS00020091204e5c4000ph&pp=1&fcpil=en&napc=S&sa_from=, Media Report, including Wikileaks; http://bw.china-embassy.org/eng/xwdt/t785778.htm, Government Source (Donor/Recipient); http://www.ccs.org.za/wp-content/uploads/2014/09/Rex_PhanW_Report_Final_Rex_2014.pdf,…	4							Checked	1	ODA-like	2	Development	1	Active	1	http://global.factiva.com/aa/?ref=AFNWS00020091204e5c4000ph&pp=1&fcpil=en&napc=S&sa_from=, Media Report, including Wikileaks						1.13667	0						1	Botswana	571	227	Botswana	BWA	BW	72
37	China	Grant for National Development Plan	2009	FALSE	The Chinese government has given Botswana a grant amounting to 20 million yuan to help Botswana implement some of its priority projects in National Development Plan. The agreement was signed by Minister of Finance and Development Planning, Kenneth Matambo and Chinese Ambassador to Botswana, Liu Huanxing. The agreement follows another one amounting to 10 million yuan that was signed between China …	998	Unallocated / Unspecified	Development	Pipeline: Commitment	11	Grant	Botswana	http://allafrica.com/stories/200912040287.html, Media Report, including Wikileaks; http://global.factiva.com/aa/?ref=AFNWS00020091204e5c4000ph&pp=1&fcpil=en&napc=S&sa_from=, Media Report, including Wikileaks; http://global.factiva.com/aa/?ref=AFNWS00020091204e5c4000ph&pp=1&fcpil=en&napc=S&sa_from=, Media Report, including Wikileaks	3							Checked	1	ODA-like	2	Development	1	Active	1	http://global.factiva.com/aa/?ref=AFNWS00020091204e5c4000ph&pp=1&fcpil=en&napc=S&sa_from=, Media Report, including Wikileaks; http://global.factiva.com/aa/?ref=AFNWS00020091204e5c4000ph&pp=1&fcpil=en&napc=S&sa_from=, Media Report, including Wikileaks	20000000	CNY	1	6.83142	2.92765e+06	1.13667	3.32778e+06	2.92765e+06					1	Botswana	571	227	Botswana	BWA	BW	72
675	China	IT Human Resources Training	2009	FALSE	On September 28, 2009, the Chinese government held a handing-over ceremony for an Information Technology human resources training project. The Chinese government handed over 7 sets of video-phone equipment and trained 40 Batswana. The financial value for this donation is unknown.	220	Communications		Completion	3	Grant	Botswana	http://www.fmprc.gov.cn/chn/gxh/tyb/zwbd/t615971.htm, Government Source (Donor/Recipient); http://bodamis.gov.bw/default.aspx, Government Source (Donor/Recipient)	2							Checked	1	ODA-like	2	Development	1	Active	1							1.13667	0		2009-09-28		2009-09-28		1	Botswana	571	227	Botswana	BWA	BW	72
36	China	Phase 1: Grant for Projects Under National Development Plan (Preceded December 2009 Grant)	2009	FALSE	The Chinese government has given Botswana a grant amounting to 20 million yuan (P19.2 million) to help Botswana implement some of its priority projects in National Development Plan (NDP 10). The agreement follows another one amounting to 10 million yuan that was signed between China and Botswana in May this year. Matambo said consultations were still ongoing regarding projects to be implemented w…	998	Unallocated / Unspecified		Pipeline: Commitment	11	Grant	Botswana	http://global.factiva.com/aa/?ref=AFNWS00020091204e5c4000ph&pp=1&fcpil=en&napc=S&sa_from=, Media Report, including Wikileaks	1							Checked	1	ODA-like	2	Development	1	Active	1	http://global.factiva.com/aa/?ref=AFNWS00020091204e5c4000ph&pp=1&fcpil=en&napc=S&sa_from=, Media Report, including Wikileaks	10000000	CNY	1	6.83142	1.46383e+06	1.13667	1.66389e+06	1.46383e+06					1	Botswana	571	227	Botswana	BWA	BW	72
42	China	Photocopier and computer	2009	FALSE	In 2009, a delegation from the Nantong Municipal Council of China donated 20,000 (currency not define) to a primary school in Botswana for the purchase of a photocopier and computer.	110	Education		Completion	3	Grant	Botswana	http://global.factiva.com/aa/?ref=AFNWS00020090914e59e001gt&pp=1&fcpil=en&napc=S&sa_from=, Media Report, including Wikileaks	1	Nantong Municipal Council, Government Agency	Mophane Primary School, Academic, Training and Research	Nantong Municipal Council, Government Agency	1	Mophane Primary School, Academic, Training and Research	1	Checked	1	ODA-like	2	Development	1	Active	1	http://global.factiva.com/aa/?ref=AFNWS00020090914e59e001gt&pp=1&fcpil=en&napc=S&sa_from=, Media Report, including Wikileaks	20000					1.13667	0						1	Botswana	571	227	Botswana	BWA	BW	72
41	China	Table tennis Equipment	2009	FALSE	On September 10, 2009 a delegation from the Nantong Municipal Council of China donated table tennis equipment to Mophane Primary School in Block Five, Gaborone. The donation included five tables, paddles and balls. A representative of the Chinese embassy in Botswana, Zhou Zhigang handed over the equipment to the primary school. STAFF_NOTES: The completely concessional nature of this sports equipm…	160	Other Social infrastructure and services	Sports	Completion	3	Grant	Botswana	http://global.factiva.com/aa/?ref=AFNWS00020090914e59e001gt&pp=1&fcpil=en&napc=S&sa_from=, Media Report, including Wikileaks; http://www.jsfao.gov.cn/NewsDetail.asp?NewsID=13912, Government Source (Donor/Recipient)	2	Nantong Municipal Council, Government Agency	Mophane Primary School, Academic, Training and Research	Nantong Municipal Council, Government Agency	1	Mophane Primary School, Academic, Training and Research	1	Checked	1	ODA-like	2	Development	1	Active	1	http://global.factiva.com/aa/?ref=AFNWS00020090914e59e001gt&pp=1&fcpil=en&napc=S&sa_from=, Media Report, including Wikileaks						1.13667	0				2009-10-10		1	Botswana	571	227	Botswana	BWA	BW	72
678	China	Youth Activity Center	2009	FALSE	On August 28, 2009, an opening ceremony was held in Mahalapye for a Youth Activity Center, to which the Chinese embassy donated 80,000 BWP. Chinese funded-enterprises, presumably including Jiangxi International Economic and Technical Cooperation given their attendance, also donated office equipment and fitness facilities. The implementing organization for this project is unknown, but it's presume…	160	Other Social infrastructure and services		Completion	3	Grant	Botswana	http://finance.ifeng.com/roll/20090831/1176528.shtml, Media Report, including Wikileaks; http://bodamis.gov.bw/default.aspx, Government Source (Donor/Recipient); http://www.africaneconomicoutlook.org/countries/southern-africa/botswana/, Other Official Source (non-Donor, non-Recipient)	3		Jiangxi Corporation of International Economic and Technical Cooperation, State-Owned Company	Jiangxi Corporation of International Economic and Technical Cooperation, State-Owned Company	1			Checked	1	ODA-like	2	Development	1	Active	1		80000	BWP	1	7.15514	11180.8	1.13667	12708.9	11180.8			2009-08-28		1	Botswana	571	227	Botswana	BWA	BW	72
46	China	Confucius Institute at University of Botswana	2009	FALSE	A report made in February of 2010 stated that the Confucius Institute in the University of Botswana was officially launched in September of 2009 in order to continue educational advancement in the Chinese language, history and culture learning. 230 Botswana students have taken classes at the institute as of February 2010. STAFF_NOTES: Although this project does not specifically mention Chinese in…	110	Education		Completion	3	Scholarships/training in the donor country	Botswana	http://english.hanban.org/article/2011-12/05/content_391834.htm, Other Official Source (non-Donor, non-Recipient); http://global.factiva.com/aa/?ref=XNEWS00020100201e62100c45&pp=1&fcpil=en&napc=S&sa_from=, Media Report, including Wikileaks	2	Ministry of Education, Government Agency	University of Botswana, Academic, Training and Research			University of Botswana, Academic, Training and Research; Ministry of Education, Government Agency	2	Checked	1	OOF-like	3	Representational	3	Active	1	http://global.factiva.com/aa/?ref=XNEWS00020100201e62100c45&pp=1&fcpil=en&napc=S&sa_from=, Media Report, including Wikileaks						1.13667	0				2009-09-01		1	Botswana	571	227	Botswana	BWA	BW	72
35669	China	China's Fujian Province sends 12th medical team to Botswana	2008	FALSE	China has been sending medical teams to Botswana since 1981. China originally signed the agreement to send medical teams to Botswana in 1981. Fujian province is responsible for sending the teams. The 12th medical team is comprised of 46 members. On January 21, 2008 China and Botswana signed a protocol agreement on the 12th China Medical team. The team arrived at Botswana on December 10, 2008 and …	120	Health		Completion	3	Free-standing technical assistance	Botswana	http://bw.china-embassy.org/chn/xwdt/t402406.htm, Government Source (Donor/Recipient); http://bw.mofcom.gov.cn/article/jmxw/200812/20081205949517.shtml, Government Source (Donor/Recipient)	2							Checked	1	ODA-like	2	Development	1	Active	1							1.13667	0						1	Botswana	571	227	Botswana	BWA	BW	72
31192	China	China grants 1.1 million BP to Botswana for construction of STD treatment & training center	2008	TRUE	During the farewell ceremony for the 11th Chinese Medical Team in 2008, Health Minister, Ms Lesego Motsumi highlighted that the Chinese government has provided a grant of approximately P1.1 million to finance the construction of the National Referral STD Treatment and Training Centre in Gaborone.	120	Health	sexual health	Implementation	2	Grant	Botswana	http://bw.china-embassy.org/eng/sbgx/t525709.htm, Government Source (Donor/Recipient); http://bodamis.gov.bw/default.aspx, Government Source (Donor/Recipient)	2							Checked	1	ODA-like	2	Development	1	Active	1		1100000	BWP	0.988996	6.82686	162921	1.13667	185188	161128					1	Botswana	571	227	Botswana	BWA	BW	72
35199	China	Donation of AIDS Prevention Equipment	2008	FALSE	On August 7, 2008, China handed over the medical equipment for AIDS prevention to the government of Botswana.	120	Health		Completion	3	Grant	Botswana	http://www.thelancet.com/journals/lancet/article/PIIS0140-6736(14)60725-X/fulltext#article_upsell, Academic Journal Article; http://www.mofcom.gov.cn/aarticle/i/jyjl/k/200808/20080805713711.html, Government Source (Donor/Recipient)	2							Checked	1	ODA-like	2	Development	1	Active	1							1.13667	0						1	Botswana	571	227	Botswana	BWA	BW	72
38	China	Construction Primary Schools	2007	FALSE	On December 3, 2007 China and Botswana signed a 10 million RMB (8.1 million Pula) grant agreement on the construction of two primary schools one in Serowe and one in Maun in the Ngamiland district of Botswana. Chinese Ambassador to Botswana Ding Xiaowen and Botswana Finance Minister Baledzi Gaolathe signed on behalf of their respective governments. A handover ceremony for the schools was held on …	110	Education		Completion	3	Grant	Botswana	http://www.sourcejuice.com/1263017/2009/10/09/aid-rural-schools-Botswana-projects-completed-handover-ceremony-held/, Media Report, including Wikileaks; http://bw.china-embassy.org/eng/sbgx/t388604.htm, Government Source (Donor/Recipient); http://global.factiva.com/aa/?ref=XNHA000020101119e6bj001qd&pp=1&fcpil=en&napc=S&sa_from=, Media Report, including Wikileaks; http://global.factiva.com/aa/?ref=…	5							Checked	1	ODA-like	2	Development	1	Active	1	http://global.factiva.com/aa/?ref=XNHA000020101119e6bj001qd&pp=1&fcpil=en&napc=S&sa_from=, Media Report, including Wikileaks; http://global.factiva.com/aa/?ref=AFNWS00020091204e5c4000ph&pp=1&fcpil=en&napc=S&sa_from=, Media Report, including Wikileaks	10000000	CNY	0.837995	7.60753	1.56861e+06	1.13667	1.783e+06	1.31449e+06			2009-06-08		1	Botswana	571	227	Botswana	BWA	BW	72
31	China	Eximbank loan for housing project	2006	FALSE	On July 17, 2006, China and Botswana signed an agreement to renew a housing project started in 1998 with a new concessional loan of 55 million BWP. The project involves the construction of 293 housing units in Gaborone. The project, implemented by the China National Overseas Engineering Corporation, included low and mid-range residential single-layer brick structures, water supply and drainage, a…	160	Other Social infrastructure and services		Implementation	2	Loan (excluding debt rescheduling)	Botswana	http://www.cablegatesearch.net/cable.php?id=06GABORONE933, Media Report, including Wikileaks; http://allafrica.com/stories/200607170295.html, Media Report, including Wikileaks; http://www.eximbank.gov.cn/topic/hwtz/2006/5_06.doc, Government Source (Donor/Recipient)	3	Export-Import Bank of China, Government Agency	China National Overseas Engineering Corporation (COVEC), State-Owned Company	Export-Import Bank of China, Government Agency; China National Overseas Engineering Corporation (COVEC), State-Owned Company	2			Checked	1	ODA-like	2	Development	1	Active	1		55000000	BWP	0.743052	5.83657	1.26819e+07	1.13667	1.44152e+07	9.42334e+06	2006-01-26				1	Botswana	571	227	Botswana	BWA	BW	72
33	China	Assistance to Botswana Democratic Party	2006	FALSE	In September of 2006, while on a three-day visit to Botswana, Chinese officials allegedly pledged $120,000 and computers to the ruling Botswana Democratic Party (BDP). According to an official Chinese source, four sets of Lenovo desktop computers were donated to Mapouka primary school for their 106th anniversary celebration.	110	Education	Office equipment	Completion	3	Grant	Botswana	http://www.gov.cn/gzdt/2006-10/24/content_421406.htm, Government Source (Donor/Recipient); http://allafrica.com/stories/200609070960.html, Media Report, including Wikileaks	2		Botswana Democratic Party, Political Party			Botswana Democratic Party, Political Party	1	Checked	1	OOF-like	3	Representational	3	Active	1		120000	USD	0.743052	1	161496	1.13667	183568	120000					1	Botswana	571	227	Botswana	BWA	BW	72
11859	China	Botswana Democratic Party Cadre Training	2006	FALSE	In September of 2006, it was reported that the Botswana Democratic Party, the ruling party of Botswana, had received training from the Chinese Communist Party. BDP executive secretary Dr. Comma Serema said the CCP had promised to train young BDP cadres in China, and that he himself had recently been to China and met with CCP officials.	150	Government and Civil Society		Pipeline: Pledge	12	Scholarships/training in the donor country	Botswana	http://allafrica.com/stories/200609070960.html, Media Report, including Wikileaks; http://www.africaneconomicoutlook.org/countries/southern-africa/botswana/, Other Official Source (non-Donor, non-Recipient)	2		Botswana Democratic Party, Political Party			Botswana Democratic Party, Political Party	1	Checked	1	OOF-like	3	Representational	3	Active	1							1.13667	0						1	Botswana	571	227	Botswana	BWA	BW	72
30	China	China provides Botswana 30 million RMB loan	2005	FALSE	The Vice Premier of the State Council of the People's Republic of China, Mr. Huang Ju paid a three day Official Visit to Botswana from 19th to 21st November in 2005. During the visit, the Vice Premier held official talks with His Excellency the President of the Republic of Botswana, Mr. Festus Gontebanye Mogae. The two Governments signed three cooperation Agreements, namely; 1.) A Protocol Betwee…	998	Unallocated / Unspecified		Pipeline: Commitment	11	Loan (excluding debt rescheduling)	Botswana	http://allafrica.com/stories/200511280733.html, Media Report, including Wikileaks	1							Checked	1	ODA-like	2	Development	1	Active	1		30000000	CNY	0.696651	8.19432	5.25525e+06	1.13667	5.9735e+06	3.66107e+06		2006-01-01			1	Botswana	571	227	Botswana	BWA	BW	72
29	China	11th Chinese Medical Team	2005	FALSE	China has been sending medical teams to Botswana since 1981. China originally signed the agreement to send medical teams to Botswana in 1981. Fujian province is responsible for sending the teams. The 11th medical team is comprised of 46 members.In 2005, China and Botswana signed a protocol on sending medical teams. Under this protocol, the Chinese government agreed to send a team consisting of 41…	120	Health		Completion	3	Free-standing technical assistance	Botswana	http://www.focac.org/chn/zfyhj/t229450.htm, Government Source (Donor/Recipient); http://www.mmegi.bw/2005/November/Wednesday23/5721009251143.html, Media Report, including Wikileaks; http://nai.diva-portal.org/smash/get/diva2:399727/FULLTEXT02, Other Academic (Working Paper, Dissertation); http://shlx.chinalawinfo.com/newlaw2002/SLC/SLC.asp?Db=eag&Gid=100669356, Other Academic (Working Paper, Diss…	4							Checked	1	ODA-like	2	Development	1	Active	1							1.13667	0						1	Botswana	571	227	Botswana	BWA	BW	72
21	China	Loan for medium and low cost houses	2004	FALSE	On December 8, 2004 Botswana and China signed a P117 million loan agreement. The Minister of Finance and Development Planning, Baledzi Gaolatlhe, said the amount would enable the Botswana Housing Corporation (BHC) to construct 725 medium and low cost houses in Maun, Jwaneng, Gaborone, Lobatse, Francistown, and Palapye. The loan is payable in 15 years at an interest rate of four per cent per annum…	160	Other Social infrastructure and services		Implementation	2	Loan (excluding debt rescheduling)	Botswana	http://www.mmegi.bw/index.php?sid=10&aid=357&dir=2012/March/Wednesday14, Media Report, including Wikileaks; http://bw.mofcom.gov.cn/aarticle/jmxw/200408/20040800259996.html, Government Source (Donor/Recipient); http://global.factiva.com/aa/?ref=LQAF000020041210e0c80003v&pp=1&fcpil=en&napc=S&sa_from=, Media Report, including Wikileaks; http://www.finance.gov.bw/templates/mfdp/file/File/DEBT%20PUBL…	6		China National Overseas Engineering Corporation (COVEC), State-Owned Company; Botswana Housing Corporation, State-Owned Company	China National Overseas Engineering Corporation (COVEC), State-Owned Company	1	Botswana Housing Corporation, State-Owned Company	1	Checked	1	ODA-like	2	Development	1	Active	1	http://global.factiva.com/aa/?ref=LQAF000020041210e0c80003v&pp=1&fcpil=en&napc=S&sa_from=, Media Report, including Wikileaks	117000000	BWP	0.663629	4.69289	3.75682e+07	1.13667	4.27027e+07	2.49313e+07					1	Botswana	571	227	Botswana	BWA	BW	72
105	China	Dutlwe-Morwamosu Road [Same as Letlhakeng-Kang Phase 2]	2004	FALSE	Botswana's Public Procurement Asset Disposal Board approved the tender titled 'Construction of Letlhakeng-Kang Road Section II from Dutlwe to Morwamosu Request to negotiate with the contract, China State Construction Engineering Corporation' on October 06, 2004. The loan agreement with the Chinese government was revised to give 160 million CNY at 3% fixed interest to mature in 2021 (15 years from…	210	Transport and Storage	Transport; Road	Completion	3	Loan (excluding debt rescheduling)	Botswana	http://www.fmprc.gov.cn/chn/gxh/cgb/zcgmzysx/fz/1206_4/1206x1/, Government Source (Donor/Recipient); http://global.factiva.com/redir/default.aspx?P=sa&an=afnws00020030315dz3e000h1&cat=a&ep=ASE, Media Report, including Wikileaks; http://www.ppadb.co.bw/tender_awards_tab_hist.html, Government Source (Donor/Recipient); http://www.sourcejuice.com/1405829/2010/12/07/Botswana-China-Building-constructio…	7	Export-Import Bank of China, Government Agency	China State Construction Engineering Corporation (CSCEC), State-Owned Company; China Civil Engineering Construction Botswana (pty) Ltd., State-Owned Company	Export-Import Bank of China, Government Agency; China State Construction Engineering Corporation (CSCEC), State-Owned Company; China Civil Engineering Construction Botswana (pty) Ltd., State-Owned Company	3			Checked	1	ODA-like	2	Development	1	Active	1	http://global.factiva.com/redir/default.aspx?P=sa&an=afnws00020030315dz3e000h1&cat=a&ep=ASE, Media Report, including Wikileaks	129220330	CNY	0.663629	8.2768	2.35257e+07	1.13667	2.6741e+07	1.56124e+07		2006-09-01	2010-12-01		1	Botswana	571	227	Botswana	BWA	BW	72
22	China	Grant for human resource training and purchase of equipment	2004	FALSE	In December of 2004, Botswana and China signed a P117million loan agreement, which was to be used for low cost housing. The Minister of Finance and Development Planning, Baledzi Gaolatlhe said Beijing had also offered the government of Botswana a grant amounting to over P2 million to be used for human resource training and purchase of equipment for the project. The construction of the housing was…	150	Government and Civil Society	HR and Equipment	Pipeline: Pledge	12	Grant	Botswana	http://bw.china-embassy.org/eng/sbgx/t404979.htm, Government Source (Donor/Recipient); http://global.factiva.com/aa/?ref=LQAF000020041210e0c80003v&pp=1&fcpil=en&napc=S&sa_from=, Media Report, including Wikileaks	2		Botswana Housing Corporation, State-Owned Company			Botswana Housing Corporation, State-Owned Company	1	Checked	1	ODA-like	2	Development	1	Active	1	http://global.factiva.com/aa/?ref=LQAF000020041210e0c80003v&pp=1&fcpil=en&napc=S&sa_from=, Media Report, including Wikileaks	2000000	BWP	0.663629	4.69289	642191	1.13667	729961	426177					1	Botswana	571	227	Botswana	BWA	BW	72
23	China	Multi-Purpose Youth Centre	2004	FALSE	In 2004, Chinese Ambassador to Botswana, Difu Lin, mentioned that China had provided Botswana with a free/low interest loan for the construction of a multipurpose youth centre. The project began on October 8, 2009 and was expected to be complete by July 2011. A local Chinese source reported that the project would cost US$9.5 million and would be located between the Madirelo Training Centre and Ga…	160	Other Social infrastructure and services		Implementation	2	Loan (excluding debt rescheduling)	Botswana	http://www.mofcom.gov.cn/aarticle/i/jyjl/k/201103/20110307440647.html, Government Source (Donor/Recipient); http://english.hanban.org/article/2011-12/05/content_391834.htm, Other Official Source (non-Donor, non-Recipient); http://www.sundaystandard.info/article.php?NewsID=8627&GroupID=2, Media Report, including Wikileaks; http://bw.china-embassy.org/eng/jmwl/t531581.htm, Government Source (Donor/…	7		Zhongding International Engineering Co., Ltd. (ZIEC)	Zhongding International Engineering Co., Ltd. (ZIEC)	1			Checked	1	Vague (Official Finance)	5	Development	1	Active	1	http://global.factiva.com/aa/?ref=LQAF000020041210e0c80003v&pp=1&fcpil=en&napc=S&sa_from=, Media Report, including Wikileaks	9500000	USD	0.663629	1	1.43152e+07	1.13667	1.62717e+07	9500000	2009-10-08			2011-07-01	1	Botswana	571	227	Botswana	BWA	BW	72
119	China	Letlhakeng-Kang road, Phase 1	2003	FALSE	(PPIAF) Letlhakeng-Kang (Section 1) road (561 km.) project. The entire road construction was to cost P151.5 million and the balance of P31 million was to be financed from the domestic development fund. The loan from the Chinese government was revised for an amount of 200 million CNY with a fixed interest rate of 3% and a maturity date set for 2018 (15 years). This entire loan amount was reported …	210	Transport and Storage	Transport; Road	Completion	3	Loan (excluding debt rescheduling)	Botswana	http://www.finance.gov.bw/templates/mfdp/file/File/DEBT%20PUBLISH.pdf, Government Source (Donor/Recipient); https://publications.worldbank.org/index.php?main_page=product_info&products_id=22946, Other Official Source (non-Donor, non-Recipient); http://2bur.cscec.com/art/2013/3/29/art_421_28363.html, Implementing/Intermediary Agency Source; http://bodamis.gov.bw/default.aspx, Government Source (Do…	4	Export-Import Bank of China, Government Agency	China State Construction Engineering Corporation (CSCEC), State-Owned Company	Export-Import Bank of China, Government Agency; China State Construction Engineering Corporation (CSCEC), State-Owned Company	2			Checked	1	ODA-like	2	Development	1	Active	1		200000000	CNY	0.620703	8.27704	3.89289e+07	1.13667	4.42494e+07	2.41632e+07		2003-03-01			1	Botswana	571	227	Botswana	BWA	BW	72
337	China	Flood Relief Blankets	2000	FALSE	Botswana's local Chinese community, with the help of the Chinese Embassy, donated 2,000 blankets following floods in February of 2000.	700	Emergency Response		Completion	3	Grant	Botswana	http://global.factiva.com/aa/?ref=lba0000020010821dw2l06u7p&pp=1&fcpil=en&napc=S&sa_from=, Media Report, including Wikileaks	1		China Ministry of Foreign Affairs, Government Agency	China Ministry of Foreign Affairs, Government Agency	1			Checked	1	ODA-like	2	Development	1	Active	1	http://global.factiva.com/aa/?ref=lba0000020010821dw2l06u7p&pp=1&fcpil=en&napc=S&sa_from=, Media Report, including Wikileaks						1.13667	0				2000-02-21		1	Botswana	571	227	Botswana	BWA	BW	72
336	China	Preferential Credit Granting	2000	FALSE	In June of 2000, Chinese President Jiang Zemin met with Botswanan President Festus Mogae in Beijing to discuss bilateral relations and regional and international issues of common concern. After the talks, Jiang and Mogae attended a signing ceremony on several cooperative agreements, including an agreement between the two foreign ministries to establish political consulting mechanism, a framework …	150	Government and Civil Society	Credit	Pipeline: Commitment	11	Loan (excluding debt rescheduling)	Botswana	http://global.factiva.com/aa/?ref=bbcapp0020010804dw6c00ip6&pp=1&fcpil=en&napc=S&sa_from=, Media Report, including Wikileaks	1							Checked	1	OOF-like	3	Mixed (Some Development)	6	Active	1	http://global.factiva.com/aa/?ref=bbcapp0020010804dw6c00ip6&pp=1&fcpil=en&napc=S&sa_from=, Media Report, including Wikileaks						1.13667	0						1	Botswana	571	227	Botswana	BWA	BW	72
30487	China	Technical Assistance for Operation and Maintainance of Power Plants	2013	FALSE	On May 28, 2013, China and Burundi signed a technical assistance agreement in the operation and maintenance of equipment in power plants Mugere, Ruvyironza and Gikonge.	230	Energy Generation and Supply		Pipeline: Commitment	11	Free-standing technical assistance	Burundi	http://www.burundi-gov.bi/IMG/pdf/25_juin_2013_conference_de_presse_sur_les_realisations_du_Ministere.pdf, Government Source (Donor/Recipient)	1	China, Government Agency		China, Government Agency	1			Checked	1	ODA-like	2	Development	1	Active	1							1.13667	0						1	Burundi	516	228	Burundi	BDI	BI	108
30486	China	Donation of Fire and Construction Equipment	2013	FALSE	On May 1, 2013, China and Burundi signed an agreement to a donate fire and construction equipment.	160	Other Social infrastructure and services		Pipeline: Commitment	11	Grant	Burundi	http://www.burundi-gov.bi/IMG/pdf/25_juin_2013_conference_de_presse_sur_les_realisations_du_Ministere.pdf, Government Source (Donor/Recipient)	1							Checked	1	ODA-like	2	Development	1	Active	1							1.13667	0						1	Burundi	516	228	Burundi	BDI	BI	108
36083	China	15th Chinese medical team	2012	FALSE	China has been sending medical teams to Burundi every two years since 1987. Qinghai Province has been responsible for sending the teams. The 15th medical team of 29 members worked at a hospital in Bujumbura, a hospital in Gitega, and Mpanda General Hospital from May 2012 to May 2014.	120	Health		Completion	3	Free-standing technical assistance	Burundi	http://www.nhfpc.gov.cn/gjhzs/dyhbz/201308/d084db71bf4c48f1b868562557b2c389.shtml, Government Source (Donor/Recipient); http://bi.chineseembassy.org/chn/zbgx/sbyw/t1163311.htm, Government Source (Donor/Recipient); http://bi.mofcom.gov.cn/article/jmxw/201112/20111207901792.shtml, Government Source (Donor/Recipient); http://bi.chineseembassy.org/chn/sgxw/t935448.htm, Government Source (Donor/Recipi…	5							Checked	1	ODA-like	2	Development	1	Active	1							1.13667	0						1	Burundi	516	228	Burundi	BDI	BI	108
30491	China	Donation of goods to celebrate Burundi's fiftieth anniversary of independence	2012	FALSE	In March 2012, China donated a variety of goods to Burundi for the African country's fiftieth anniversary of independence. The goods include vehicles, computer hardware, shovels and pickaxes, and seats for stadiums under construction. The materials were kept in the President of Burundi Pierre Nkurunziza's warehouse in Ngagara, Bujumbura.	150	Government and Civil Society		Completion	3	Grant	Burundi	http://www.burundi-gov.bi/Burundi-Developpement-Le-President,2115, Government Source (Donor/Recipient)	1							Checked	1	ODA-like	2	Development	1	Active	1							1.13667	0						1	Burundi	516	228	Burundi	BDI	BI	108
30058	China	Donation of solar photovoltaic systems	2012	FALSE	In 2012, the Chinese Ambassador Yu Xuzhong presented the solar photovoltaic systems for public lighting infrastructure to the Minister of Energy and Mines of Burundi, Como Manirakiza. They were being installed by Huawei Technologies and should have been completed by November 1, 2012. The donation was made possible by a Chinese monetary grant given to the country. The ambassador said that the proj…	230	Energy Generation and Supply		Completion	3	Grant	Burundi	http://www.burundi-gov.bi/Burundi-Chine-La-Chine-remet-au, Other; http://en.igihe.com/news/china-gives-us-1-3milion-to-improve-burundi.html, Media Report, including Wikileaks	2		Huawei Technologies Co., Ltd., Private Sector	Huawei Technologies Co., Ltd., Private Sector	1			Checked	1	ODA-like	2	Development	1	Active	1		8500000	CNY	1.1898	6.32111	1.13019e+06	1.13667	1.28466e+06	1.3447e+06				2012-11-01	1	Burundi	516	228	Burundi	BDI	BI	108
30096	China	Donation of vehicles to health ministry	2012	FALSE	On April 23, 2012, China donated six vehicles (two ambulances, two minibuses, and two small-sized cars) worth an estimated 200,000 USD to Burundi. The vehicles were given by the Chinese government to the Burundian public health and AIDS control ministry.	120	Health		Completion	3	Grant	Burundi	http://global.factiva.com/aa/?ref=XNEWS00020120424e84o0036e&pp=1&fcpil=en&napc=S&sa_from=, Media Report, including Wikileaks; http://english.eastday.com/e/120424/u1a6511509.html, Media Report, including Wikileaks	2							Checked	1	ODA-like	2	Development	1	Active	1	http://global.factiva.com/aa/?ref=XNEWS00020120424e84o0036e&pp=1&fcpil=en&napc=S&sa_from=, Media Report, including Wikileaks	200000	USD	1.1898	1	168096	1.13667	191070	200000	2012-04-23		2012-04-23		1	Burundi	516	228	Burundi	BDI	BI	108
30480	China	China agrees to provide interest-free loan of 100 million CNY to Burundi	2011	FALSE	During the 11th session of the Mixed Commission on Sino-Burundian Cooperation in August 2011, China and Burundi signed an agreement for an interest-free loan of 100 million CNY. The Chinese Vice Minister for Commerce Gao Hucheng and the Burundian Minister of Foreign Affairs and International Cooperation Augustin Sanze were presented for the ceremony. The loan is to be used to execute priority pro…	998	Unallocated / Unspecified		Pipeline: Commitment	11	Loan (excluding debt rescheduling)	Burundi	http://www.burundi-gov.bi/Burundi-Cooperation-11eme-Session, Government Source (Donor/Recipient)	1							Checked	1	ODA-like	2	Development	1	Active	1		100000000	CNY	1.20634	6.46146	1.28291e+07	1.13667	1.45826e+07	1.54764e+07					1	Burundi	516	228	Burundi	BDI	BI	108
30063	China	Aircraft MA60 deal	2011	FALSE	On September 16, 2011, a trade agreement was negotiated and signed between AVIC International Society and the Minister of Transport, Public Works, and Infrastructure for Burundi. The agreement provided that China would donate a MA60 aircraft to the country's limited aircraft supply as long as they in turn would buy a second plane from AVIC. MA60 is a turboprop-powered airliner made by Xi'an Aircr…	210	Transport and Storage		Completion	3	Grant	Burundi	http://www.burundi-gov.bi/Burundi-Transport-Ceremonies-de, Government Source (Donor/Recipient); http://www.wcarn.com/cache/news/19/19873.html, Media Report, including Wikileaks	2		Xi'an Aircraft International Corporation (XAIC), State-Owned Company	Xi'an Aircraft International Corporation (XAIC), State-Owned Company	1			Checked	1	OOF-like	3	Mixed (Some Development)	6	Active	1							1.13667	0						1	Burundi	516	228	Burundi	BDI	BI	108
31317	China	Confucius Institute at the University of Burundi	2011	FALSE	On February 18, 2011 an agreement was signed between the Confucius Institute headquartered in Hanban and the University of Burundi to co-build a Confucius Institute with Bohai University. The opening ceremony for the institute was in July 2012 and operations began September 2012. The institute houses more than 400 students enrolled at UB and 200 students from Burundi high schools. This is part of…	110	Education		Completion	3	Grant	Burundi	http://english.hanban.org/node_42043.htm, Government Source (Donor/Recipient); http://www.csc.edu.cn/studyinchina/universityabouten.aspx?collegeId=329, Other Official Source (non-Donor, non-Recipient); http://french.china.org.cn/foreign/txt/2014-09/28/content_33634248.htm, Media Report, including Wikileaks; http://www.rtnb.bi/index.php?option=com_content&view=article&id=5475:linstitut-confucius-d…	5	Confucius Institute, Government Agency	Bohai University, Private Sector	Confucius Institute, Government Agency	1			Checked	1	OOF-like	3	Representational	3	Active	1							1.13667	0		2011-02-18		2012-09-06		1	Burundi	516	228	Burundi	BDI	BI	108
30065	China	Medical equipment donation	2011	FALSE	At the opening of the new hospital (#12298), the Chinese Ambassador Yu Xuzhong promised that China would commit to donating medical equipment and assisting in training for medical staff at the new hospital. The medical donations were supposed to have totaled 1.4 million USD. There is no clear indication of when that donation was or will be delivered.	120	Health		Pipeline: Pledge	12	Grant	Burundi	http://www.burundi-gov.bi/Burundi-Sante-ceremonies-de-remise, Other; http://www.sourcejuice.com/1417714/2011/01/20/President-Nkurunziza-attended-aid-Bumubangda-General-Hospital-handover-ceremony/, Media Report, including Wikileaks	2							Checked	1	ODA-like	2	Development	1	Active	1		1400000	USD	1.20634	1	1.16053e+06	1.13667	1.31914e+06	1400000					1	Burundi	516	228	Burundi	BDI	BI	108
30476	China	Mixed Commission on Sin-Burundian Cooperation Grant	2011	FALSE	During the 11th session of the Mixed Commission on Sino-Burundian Cooperation in August 2011, China and Burundi signed an agreement for a grant worth 50 million CNY. The Chinese Vice Minister for Commerce Gao Hucheng and the Burundian Minister of Foreign Affairs and International Cooperation Augustin Sanze were presented for the ceremony. The grant is to be used to execute priority projects to be…	998	Unallocated / Unspecified		Pipeline: Commitment	11	Grant	Burundi	http://www.burundi-gov.bi/Burundi-Cooperation-11eme-Session, Government Source (Donor/Recipient)	1							Checked	1	ODA-like	2	Development	1	Active	1		50000000	CNY	1.20634	6.46146	6.41457e+06	1.13667	7.29128e+06	7.73819e+06					1	Burundi	516	228	Burundi	BDI	BI	108
36085	China	14th Chinese medical team	2010	FALSE	China has been sending medical teams to Burundi every two years since 1987. Qinghai Province has been responsible for sending the teams. The 14th medical team of 29 members worked in Burundi from May 2010 to May 2012.	120	Health		Completion	3	Free-standing technical assistance	Burundi	http://www.nhfpc.gov.cn/gjhzs/dyhbz/201308/d084db71bf4c48f1b868562557b2c389.shtml, Government Source (Donor/Recipient); http://bi.chineseembassy.org/chn/sgxw/t935448.htm, Government Source (Donor/Recipient); http://www.fmprc.gov.cn/mfa_chn/zwbd_602255/t585420.shtml, Government Source (Donor/Recipient)	3							Checked	1	ODA-like	2	Development	1	Active	1							1.13667	0						1	Burundi	516	228	Burundi	BDI	BI	108
357	China	Socio-economic Project Donation	2010	FALSE	Chinese Vice-Foreign Minister Zhai Jun and Burundi's Minister of Foreign Affairs and International Cooperation Augustin Nsanze met in June of 2010 in Bujumbura to discuss the iron donation from Project #355. Also during this meeting, China agreed to give 40,000,000 CNY to Burundi for socio-economic projects. The types of projects were not determined at the meeting.	998	Unallocated / Unspecified		Pipeline: Commitment	11	Grant	Burundi	http://global.factiva.com/aa/?ref=BBCAP00020100826e68q001e2&pp=1&fcpil=en&napc=S&sa_from=, Media Report, including Wikileaks	1							Checked	1	ODA-like	2	Development	1	Active	1	http://global.factiva.com/aa/?ref=BBCAP00020100826e68q001e2&pp=1&fcpil=en&napc=S&sa_from=, Media Report, including Wikileaks	40000000	CNY	1.07564	6.77027	5.4927e+06	1.13667	6.24341e+06	5.90818e+06					1	Burundi	516	228	Burundi	BDI	BI	108
32967	China	China provides agricultural experts to Burundi	2009	TRUE	On July 23, 2009, 3 agricultural experts and 1 interpreter arrived in Bujumbura for a year of agricultural development assistance.	310	Agriculture, Forestry and Fishing		Completion	3	Free-standing technical assistance	Burundi	http://jjhzj.mofcom.gov.cn/article/y/200907/20090706425027.shtml, Government Source (Donor/Recipient); http://www.chinadaily.com.cn/opinion/2011-04/22/content_12374296_4.htm, Media Report, including Wikileaks; http://www.africaneconomicoutlook.org/countries/east-africa/burundi/, Other Official Source (non-Donor, non-Recipient)	3							Checked	1	ODA-like	2	Development	1	Active	1							1.13667	0						1	Burundi	516	228	Burundi	BDI	BI	108
30062	China	Training for Burundians	2009	TRUE	In an event commemorating a donation to Foundation Buntu, the Chinese Ambassador to Burundi, Mr. Ian Zeny Ci, stated that the Chinese government will continue to support the development efforts in Burundi by continuing to provide training courses to the people. There is no indication for what this training consists of nor when it began.	998	Unallocated / Unspecified		Pipeline: Pledge	12	Free-standing technical assistance	Burundi	http://www.burundi-gov.bi/L-ambassadeur-de-la-Chine-au, Other	1							Checked	1	ODA-like	2	Development	1	Active	1							1.13667	0						1	Burundi	516	228	Burundi	BDI	BI	108
30061	China	Construction of rural school	2009	FALSE	During a speech thanking the Chinese embassy for a donation, the First Lady of Burundi also mentioned how the Chinese were involved in constructing a primary school in Rukaramu. This school is different than Project ID #12292 in which three other rural schools were built with Chinese aid. Another report shared that the Burundi president referenced three rural schools to have been completed in the…	110	Education		Completion	3	Grant	Burundi	http://www.burundi-gov.bi/L-ambassadeur-de-la-Chine-au, Other; http://www.burundi-gov.bi/Le-President-Nkurunziza-inaugure, Other	2							Checked	1	ODA-like	2	Development	1	Active	1							1.13667	0					2009-06-01	1	Burundi	516	228	Burundi	BDI	BI	108
30060	China	Sewing and cooking supplies donation to Foundation Buntu	2009	FALSE	The Chinese Embassy in Burundi gave the Foundation Buntu a gift of 20 sewing machines and cooking supplies on May 7, 2009. The Foundation is a project of the First Lady of Burundi designed to help women and children. The supplies were given in order to help train women in these areas as well as training for computer literacy and aid for widows and orphans. There was no information on how much the…	420	Women in Development		Completion	3	Grant	Burundi	http://www.burundi-gov.bi/L-ambassadeur-de-la-Chine-au, Other	1							Checked	1	ODA-like	2	Development	1	Active	1							1.13667	0						1	Burundi	516	228	Burundi	BDI	BI	108
345	China	Interest-free Loan	2008	FALSE	On January 9th, 2008, Chinese Foreign Minister Yang Jiechi and Burundi Foreign Minister Antoinette Batumubwira signed an interest-free loan agreement worth $2 million. The Chinese foreign ministry described it as an agreement on economic and technological cooperation between the two governments. No further information on the projects financed with this loan can be found.	998	Unallocated / Unspecified		Pipeline: Commitment	11	Loan (excluding debt rescheduling)	Burundi	http://chn.chinamil.com.cn/xwpdxw/gjssxw/2009-11/07/content_4075713.htm, Other Official Source (non-Donor, non-Recipient); http://www.fmprc.gov.cn/eng/wjb/zzjg/fzs/xwlb/t399193.htm, Government Source (Donor/Recipient); http://allafrica.com/stories/201002040729.html, Media Report, including Wikileaks	3							Checked	1	ODA-like	2	Development	1	Active	1		2000000	USD	0.988996	1	2.02225e+06	1.13667	2.29864e+06	2000000					1	Burundi	516	228	Burundi	BDI	BI	108
36088	China	13th Chinese medical Team	2008	FALSE	China has been sending medical teams to Burundi every two years since 1987. Qinghai Province has been responsible for sending the teams. The 13th medical team of 29 members arrived in Burundi on May 30, 2008. They worked at a hospital in Bujumbura, a hospital in Gitega, and another hospital in Muramvya until May 2010.	120	Health		Completion	3	Free-standing technical assistance	Burundi	http://www.621m.cn/search/doc/2438, Media Report, including Wikileaks; http://www.qhnews.com/newscenter/system/2009/02/27/002697257.shtml, Media Report, including Wikileaks; http://www.nhfpc.gov.cn/gjhzs/dyhbz/201308/d084db71bf4c48f1b868562557b2c389.shtml, Government Source (Donor/Recipient)	3							Checked	1	ODA-like	2	Development	1	Active	1							1.13667	0						1	Burundi	516	228	Burundi	BDI	BI	108
31196	China	China provides funding to for electoral support	2008	FALSE	According to Burundi's Development Assistance Database, in 2008 the Chinese Ministry of Foreign Affairs committed to donating 263,000 USD to build Burundi's electoral capacity. The Chinese Ministry of Finance was just one donor for the capacity-building projects. Other donors included, France, Australia, Belguim, Canada, Japan, Egypt, Norway, and the United Nations. The total value of the project…	150	Government and Civil Society	support for the electoral process	Completion	3	Grant	Burundi	http://dad.synisys.com/dadburundi/, Government Source (Donor/Recipient)	1	Ministry of Foreign Affairs, Government Agency		Ministry of Foreign Affairs, Government Agency	1			Checked	1	ODA-like	2	Development	1	Active	1		263000	USD	0.988996	1	265926	1.13667	302271	263000		2008-09-01	2010-12-31		1	Burundi	516	228	Burundi	BDI	BI	108
12298	China	Construction of Mpanda General Hospital	2008	FALSE	In 2008, China and Burundi made an agreement in which China would build a general hospital for Burundi in the context of the Forum on China-Africa Cooperation. The hospital is located in Bubangza Province. The hospital officially started construction on May 14, 2009. The expected amount of the hospital topped 9 million US dollars, given in the form of a grant from the Chinese government. Burundi'…	120	Health		Completion	3	Grant	Burundi	http://news.xinhuanet.com/english2010/china/2010-10/01/c_13538965.htm, Media Report, including Wikileaks; http://www.focac.org/eng/zxxx/t789700.htm, Government Source (Donor/Recipient); http://www.accessmylibrary.com/article-1G1-187338543/china-diversifies-cooperation-burundi.html, Media Report, including Wikileaks; http://www.burundi-gov.bi/Le-President-Nkurunziza-a-inaugure,1133, Other; http://…	11							Checked	1	ODA-like	2	Development	1	Active	1		8385275	USD	0.988996	1	8.47857e+06	1.13667	9.63737e+06	8385275	2009-05-14		2011-01-19		1	Burundi	516	228	Burundi	BDI	BI	108
12303	China	Construction of Presidential Palace	2008	FALSE	In 2008, China agreed to build a presidential palace in Burundi. In November 2010, Burundi's Second Deputy-President Gervais Rufyikiri and Chinese Ambassador to Burundi Yu Xuzhong agreed on a grant from China for the construction of the presidential palace in Gasenyi, some 8 km northeast of Bujumbura's city center. Terrain studies were due to start in December 2010, followed by construction in Ja…	150	Government and Civil Society		Pipeline: Commitment	11	Grant	Burundi	http://english.cri.cn/6909/2010/11/12/2021s604625.htm, Media Report, including Wikileaks; http://www.accessmylibrary.com/article-1G1-187338543/china-diversifies-cooperation-burundi.html, Media Report, including Wikileaks; http://www.globaltimes.cn/content/814549.shtml, Media Report, including Wikileaks	3							Checked	1	ODA-like	2	Development	1	Active	1							1.13667	0			2011-01-01			1	Burundi	516	228	Burundi	BDI	BI	108
12292	China	Rural Elementary Schools	2008	FALSE	In 2008, China agreed to build three rural elementary schools in Burundi. Two of the schools were to be built in Karusi Province (eastern central Burundi) in Nyabikere Mutumba and another at the Bujumbura Town Hall at Gihosha. The President of Burundi, Pierre Nkurunziza, received the finished schools on Dec. 17, 2008. The schools were built as part of the promise made by China at the Beijing Summ…	110	Education		Completion	3	Grant	Burundi	http://www.accessmylibrary.com/article-1G1-187338543/china-diversifies-cooperation-burundi.html, Media Report, including Wikileaks; http://www.burundi-gov.bi/L-ambassadeur-de-la-Chine-au, Other; http://www.burundi-gov.bi/Le-President-Burundais-apprecie-l, Other; http://www.africaneconomicoutlook.org/countries/east-africa/burundi/, Other Official Source (non-Donor, non-Recipient)	4		Hainan Construction Engineering Corporation, State-Owned Company	Hainan Construction Engineering Corporation, State-Owned Company	1			Checked	1	ODA-like	2	Development	1	Active	1		15000000	CNY	0.988996	6.94865	2.18271e+06	1.13667	2.48103e+06	2.15869e+06			2008-12-17		1	Burundi	516	228	Burundi	BDI	BI	108
355	China	Construction Material for Schools and Health Centers	2008	FALSE	On June 23, 2010 in Bujumbura, Burundi, Chinese Vice-Foreign Minister Zhai Jun and Burundi's Minister of Foreign Affairs and International Cooperation Augustin Nsanze signed for a donation of galvanized iron and nails by the Chinese government to Burundi's government. The donation would go to support the construction of schools and health centers in the country. It is part of an agreement worth 4…	430	Other Multisector		Completion	3	Loan (excluding debt rescheduling)	Burundi	http://bnub.unmissions.org/Default.aspx?tabid=2961&ctl=Details&mid=5312&ItemID=3160&language=en-US, NGO/Civil Society/Advocacy; http://global.factiva.com/aa/?ref=BBCAP00020100826e68q001e2&pp=1&fcpil=en&napc=S&sa_from=, Media Report, including Wikileaks; http://www.burundi-gov.bi/Burundi-Developpement-Don-de-100, Other	3	China Development Bank (CDB), Government Agency; China Development Bank (CDB), Government Agency	Republic of Burundi, Government Agency	China Development Bank (CDB), Government Agency; China Development Bank (CDB), Government Agency	2	Republic of Burundi, Government Agency	1	Checked	1	OOF-like	3	Development	1	Active	1	http://global.factiva.com/aa/?ref=BBCAP00020100826e68q001e2&pp=1&fcpil=en&napc=S&sa_from=, Media Report, including Wikileaks	4000000	CNY	0.988996	6.94865	582056	1.13667	661608	575651	2011-06-25		2011-06-25		1	Burundi	516	228	Burundi	BDI	BI	108
327	China	Post-graduate studies scholarships	2008	FALSE	In 2008, China offered 10 scholarships to Burundian students for post-graduate studies in China. The amount, current status, and start and end dates are unknown.	110	Education		Pipeline: Pledge	12	Scholarships/training in the donor country	Burundi	http://www.accessmylibrary.com/article-1G1-187338543/china-diversifies-cooperation-burundi.html, Media Report, including Wikileaks; http://www.fmprc.gov.cn/mfa_chn/wjdt_611265/zwbd_611281/t510235.shtml, Government Source (Donor/Recipient); http://www.africaneconomicoutlook.org/countries/east-africa/burundi/, Other Official Source (non-Donor, non-Recipient)	3							Checked	1	ODA-like	2	Development	1	Active	1							1.13667	0			2008-11-09			1	Burundi	516	228	Burundi	BDI	BI	108
824	China	Mugere Hydropwer Station access road construction (linked to project ID #825)	2008	FALSE	On August 13, 2009, the China Road And Bridge Corporation (CRBC) signed a contract to construct the 8.4km access road to the Mugere Hydropower Station to support the repair work there. The road is being constructed with financial support from a Chinese government grant of roughly 1.7 million USD. According to Burundi's Development Assistance Database, the Chinese government ultimately disbursed 1…	210	Transport and Storage	Transport; Road	Completion	3	Vague TBD	Burundi	https://publications.worldbank.org/index.php?main_page=product_info&products_id=22946, Other Official Source (non-Donor, non-Recipient); http://english.cri.cn/6909/2010/11/12/2021s604625.htm, Media Report, including Wikileaks; http://finance.ifeng.com/roll/20090821/1128568.shtml, Media Report, including Wikileaks	3		China Road & Bridge Corporation (CRBC), State-Owned Company	China Road & Bridge Corporation (CRBC), State-Owned Company	1			Checked	1	Vague (Official Finance)	5	Development	1	Active	1		1693583	USD	0.988996	1	1.71243e+06	1.13667	1.94647e+06	1693583	2008-08-08		2009-12-30	2009-11-01	1	Burundi	516	228	Burundi	BDI	BI	108
316	China	Debt cancellation Part 1	2007	FALSE	On May 25, 2007 in Bujumbura, Burundi during a two-day conference there, China cancelled 213 million CNY of Burundian debt.	600	Action Relating to Debt		Completion	3	Debt forgiveness	Burundi	http://books.google.com/books?id=06cqWiUMWeQC&lpg=PA36&ots=4lP0O2FXf9&dq=burundi%2525252520china%2525252520debt%2525252520relief%25252525202007&pg=PP1#v=onepage&q=PRC&f=false, Other; http://reliefweb.int/report/burundi/donors-pledge-665-mln-burundi-reconstruction, Media Report, including Wikileaks; http://search.proquest.com.gate2.library.lse.ac.uk/docview/192450042/13E94BE773A636C977E/4?accounti…	3							Checked	1	ODA-like	2	Development	1	Active	1		213000000	CNY	0.837995	7.60753	3.34114e+07	1.13667	3.79778e+07	2.79986e+07	2007-05-25		2007-05-25		1	Burundi	516	228	Burundi	BDI	BI	108
12353	China	Debt cancellation Part 2	2007	FALSE	On September 11-13, 2007 at the conclusion of the 10th session of the Joint Sino-Burundian Commission in Bujumbura, Burundi, China and Burundi signed a draft agreement relating to the cancellation of Burundi's debts to China of 137,470,000 CNY.	600	Action Relating to Debt		Completion	3	Debt forgiveness	Burundi	http://books.google.com/books?id=06cqWiUMWeQC&lpg=PA36&ots=4lP0O2FXf9&dq=burundi%2525252520china%2525252520debt%2525252520relief%25252525202007&pg=PP1#v=onepage&q=PRC&f=false, Other; http://www.accessmylibrary.com/article-1G1-187338543/china-diversifies-cooperation-burundi.html, Media Report, including Wikileaks	2							Checked	1	ODA-like	2	Development	1	Active	1		137470000	CNY	0.837995	7.60753	2.15637e+07	1.13667	2.45109e+07	1.80702e+07	2007-09-13		2007-09-13		1	Burundi	516	228	Burundi	BDI	BI	108
30064	China	Grant for Strategic Framework for the Fight Against Poverty	2007	FALSE	On August 29, 2007, the Burundian President received a gift valued at 10 million CNY for the Strategic Framework for the Fight Against Poverty. The goal of this framework is to reduce poverty in both urban and rural areas while also focusing on restoring social security and the national economy. The Chinese donation included building materials, telecommunication and safety equipment, and material…	160	Other Social infrastructure and services		Completion	3	Grant	Burundi	http://www.burundi-gov.bi/L-Ambassadeur-chinois-Zeng-Xianqi, Other	1							Checked	1	ODA-like	2	Development	1	Active	1		10000000	CNY	0.837995	7.60753	1.56861e+06	1.13667	1.783e+06	1.31449e+06			2007-08-29		1	Burundi	516	228	Burundi	BDI	BI	108
319	China	Malaria Treatment Center	2007	FALSE	At the Beijing Summit of the Forum on China-Africa Cooperation (FOCAC) in November 2006, China pledged to construct a malaria prevention and treatment center later designated to be built for Burundi. The opening ceremony was held on March 27, 2008. According to Burundi's Development Assistance Database, China has disbursed 439,811 USD in funding for the center.	120	Health		Completion	3	Grant	Burundi	nai.diva-portal.org/smash/get/diva2:399727/FULLTEXT02, NGO/Civil Society/Advocacy; http://www.focac.org/eng/ltda/dscbzjhy/FA32009/t459449.htm, Government Source (Donor/Recipient); http://global.factiva.com/aa/?ref=BBCAPP0020071011e3ab0015p&pp=1&fcpil=en&napc=S&sa_from=, Media Report, including Wikileaks; http://dad.synisys.com/dadburundi/, Government Source (Donor/Recipient); http://bi.mofcom.gov…	6							Checked	1	ODA-like	2	Development	1	Active	1	http://global.factiva.com/aa/?ref=BBCAPP0020071011e3ab0015p&pp=1&fcpil=en&napc=S&sa_from=, Media Report, including Wikileaks	1081128	USD	0.837995	1	1.29014e+06	1.13667	1.46646e+06	1081128	2008-09-12				1	Burundi	516	228	Burundi	BDI	BI	108
12324	China	Malaria Treatment Drugs	2007	FALSE	According to Burundi's Development Assistance Database, China donated health supplies to Burundi in 2007. The total project commitment was roughly 200 thousand USD of which 64 thousand USD have been disbursed.	120	Health		Implementation	2	Grant	Burundi	http://www.accessmylibrary.com/article-1G1-187338543/china-diversifies-cooperation-burundi.html, Media Report, including Wikileaks; http://dad.synisys.com/dadburundi/, Government Source (Donor/Recipient)	2							Checked	1	ODA-like	2	Development	1	Active	1		202063	USD	0.837995	1	241127	1.13667	274082	202063					1	Burundi	516	228	Burundi	BDI	BI	108
825	China	Rehabilitation of Mugere hydroelectric station	2007	FALSE	On September 11-13, 2007 at the conclusion of the 10th session of the Joint Sino-Burundian Commission, China and Burundi signed an agreement for a grant of 30 million CNY for the rehabilitation of the Mugere Hydroelectric Station in the Province of Bujumbura Rural. On November 15, 2010, a completion ceremony was held in Mugree. ??????????????????????? 1?2?,?????????????????????????,??????????????…	230	Energy Generation and Supply	Electricity; Hydro-generation	Implementation	2	Grant	Burundi	http://news.xinhuanet.com/english2010/china/2010-10/01/c_13538965.htm, Media Report, including Wikileaks; https://publications.worldbank.org/index.php?main_page=product_info&products_id=22946, Other Official Source (non-Donor, non-Recipient); http://www.accessmylibrary.com/article-1G1-187338543/china-diversifies-cooperation-burundi.html, Media Report, including Wikileaks; http://finance.ifeng.com…	8		Hebei Hydraulic Engineering Bureau; China Gezhouba Group Company Ltd. (CGGC), State-Owned Company	Hebei Hydraulic Engineering Bureau; China Gezhouba Group Company Ltd. (CGGC), State-Owned Company	2			Checked	1	ODA-like	2	Development	1	Active	1		30000000	CNY	0.837995	7.60753	4.70583e+06	1.13667	5.34899e+06	3.94346e+06					1	Burundi	516	228	Burundi	BDI	BI	108
36089	China	12th Chinese medical team	2006	FALSE	China has been sending medical teams to Burundi every two years since 1987. Qinghai Province has been responsible for sending the teams. The 12th medical team of 29 members worked in Burundi from May 2006 to May 2008.	120	Health		Completion	3	Free-standing technical assistance	Burundi	http://bi.mofcom.gov.cn/article/jmxw/200706/20070604789597.shtml, Government Source (Donor/Recipient); http://www.qhwjw.gov.cn/gzdtt/hydt/2007/01/26/1169800920039.html, Government Source (Donor/Recipient); http://www.mfa.gov.cn/mfa_chn//ziliao_611306/zt_611380/ywzt_611452/2008zt_611636/kzjz_611664/t459646.shtml, Government Source (Donor/Recipient); http://www.nhfpc.gov.cn/gjhzs/dyhbz/201308/d084d…	4							Checked	1	ODA-like	2	Development	1	Active	1							1.13667	0						1	Burundi	516	228	Burundi	BDI	BI	108
23098	China	Construction of Higher Teacher-Training School	2006	FALSE	In 2006, China launched a project to expand the Burundi Senior Normal College (ECOLE NORMALE SUPï¿½RIEURE) located in Bujumbura. The expansion of the college was expected to be completed in March next year. An extension to the original school was opened on August 15, 2008. The extension cost 10 million Euros and was a donation from China. On November 12, 2010, during a meeting between Burundi's S…	110	Education		Completion	3	Grant	Burundi	http://vlex.cn/vid/gradually-fulfills-benefits-africans-198699203, Media Report, including Wikileaks; http://www.ens-burundi.org/index.php?id=13&L=1, Other; http://english.cri.cn/6909/2010/11/12/2021s604625.htm, Media Report, including Wikileaks; http://www.burundi-gov.bi/Le-President-Nkurunziza-inaugure, Other; http://www.africaneconomicoutlook.org/countries/east-africa/burundi/, Other Official …	5							Checked	1	ODA-like	2	Development	1	Active	1		10000000	EUR	0.743052	0.7967	1.68922e+07	1.13667	1.92009e+07	1.25518e+07					1	Burundi	516	228	Burundi	BDI	BI	108
12194	China	Medical Teams	2005	FALSE	On September 15, 2005 in Gitega, Burundi, a delegation from China's Qinghai province promised to continue to supply Chinese medical teams to Gitega who will take over from one another every two years, as well as supply medicine. A paper with data into 2008 mentioned them as continuing to be supplied up to that point. The commitment of medical teams began in December 1986 with medical teams from G…	120	Health		Implementation	2	Free-standing technical assistance	Burundi	nai.diva-portal.org/smash/get/diva2:399727/FULLTEXT02, NGO/Civil Society/Advocacy; http://global.factiva.com/aa/?ref=BBCAP00020050915e19f002bd&pp=1&fcpil=en&napc=S&sa_from=, Media Report, including Wikileaks; http://news.sina.com.cn/s/2005-11-28/09157558079s.shtml, Media Report, including Wikileaks; http://nai.diva-portal.org/smash/get/diva2:399727/FULLTEXT02, Other Academic (Working Paper, Disse…	5							Checked	1	ODA-like	2	Development	1	Active	1	http://global.factiva.com/aa/?ref=BBCAP00020050915e19f002bd&pp=1&fcpil=en&napc=S&sa_from=, Media Report, including Wikileaks						1.13667	0						1	Burundi	516	228	Burundi	BDI	BI	108
292	China	Hospital Equipment	2005	FALSE	On September 13, 2005 during a visit to Gitega, Burundi, Qinghai's vice-governor, Mr Deng Ben Tai, promised to rehabilitate the hospital equipment of Gitega hospital. The amount, current status, and start and end dates are unknown.	120	Health		Pipeline: Pledge	12	Grant	Burundi	http://global.factiva.com/aa/?ref=BBCAP00020050915e19f002bd&pp=1&fcpil=en&napc=S&sa_from=, Media Report, including Wikileaks	1							Checked	1	ODA-like	2	Development	1	Active	1	http://global.factiva.com/aa/?ref=BBCAP00020050915e19f002bd&pp=1&fcpil=en&napc=S&sa_from=, Media Report, including Wikileaks						1.13667	0						1	Burundi	516	228	Burundi	BDI	BI	108
36091	China	11th Chinese medical team	2004	FALSE	China has been sending medical teams to Burundi every two years since 1987. Qinghai Province has been responsible for sending the teams. The 11th medical team of 29 members arrived in Burundi on May 21, 2004, and they returned to China in May 2006.	120	Health		Completion	3	Free-standing technical assistance	Burundi	http://news.sina.com.cn/c/p/2005-08-27/21507611145.shtml, Media Report, including Wikileaks; http://www.nhfpc.gov.cn/gjhzs/gwsb/201308/dcbd29a4886b414086e016ff7c7f8734.shtml, Government Source (Donor/Recipient); http://www.nhfpc.gov.cn/gjhzs/dyhbz/201308/d084db71bf4c48f1b868562557b2c389.shtml, Government Source (Donor/Recipient)	3							Checked	1	ODA-like	2	Development	1	Active	1							1.13667	0						1	Burundi	516	228	Burundi	BDI	BI	108
91	China	Exim Bank Provides Loan for GSM mobile telecommunication project	2004	FALSE	(PPIAF-ID:51) In 2004, Huawei signed a contract with Burundi to implement the 6 month Burundi GSM mobile telecommunication project. The project includes three parts: GSM mobile network extension from original 30000 users to 60000 users for the nation's capital Bujumbura and its neighborhood, and fixed access switching in three cities. The China Exim Bank provided 7.91 million USD financing for th…	220	Communications	Telecom; Mobile assets	Completion	3	Loan (excluding debt rescheduling)	Burundi	http://www.telegeography.com/products/commsupdate/articles/2006/05/22/econet-acquires-65-stake-in-burundi-gsm-operator/, Other Official Source (non-Donor, non-Recipient); https://publications.worldbank.org/index.php?main_page=product_info&products_id=22946, Other Official Source (non-Donor, non-Recipient)	2	Export-Import Bank of China, Government Agency	Huawei Technologies Co., Ltd., Private Sector	Huawei Technologies Co., Ltd., Private Sector; Export-Import Bank of China, Government Agency	2			Checked	1	Vague (Official Finance)	5	Development	1	Active	1		7910000	USD	0.663629	1	1.19193e+07	1.13667	1.35484e+07	7910000		2004-04-01	2006-03-01		1	Burundi	516	228	Burundi	BDI	BI	108
290	China	Economic Grant	2003	FALSE	On June 30, 2003, the Burundi external relations and cooperation minister, Mr Terence Sinunguruza, and the Chinese ambassador to Burundi, Mr Feng Zhijun signed a 30 million CNY aid agreement. The grant will be given free of charge, and will be used to accomplish projects to be decided by both parties. Specifically, the aid is meant to 'contribute to Burundi's economic recovery.' The projects to b…	998	Unallocated / Unspecified		Pipeline: Commitment	11	Grant	Burundi	http://www.cnnz.gov.cn/bbxq_content/2011-02/17/content_1187064.htm, Government Source (Donor/Recipient); http://global.factiva.com/aa/?ref=bbcap00020030703dz73006y3&pp=1&fcpil=en&napc=S&sa_from=, Media Report, including Wikileaks	2							Checked	1	ODA-like	2	Development	1	Active	1	http://global.factiva.com/aa/?ref=bbcap00020030703dz73006y3&pp=1&fcpil=en&napc=S&sa_from=, Media Report, including Wikileaks	30000000	CNY	0.620703	8.27704	5.83933e+06	1.13667	6.63741e+06	3.62449e+06		2003-06-30			1	Burundi	516	228	Burundi	BDI	BI	108
36092	China	10th Chinese medical team	2002	FALSE	China has been sending medical teams to Burundi every two years since 1987. Qinghai Province has been responsible for sending the teams. The 10th medical team of 29 members worked in Burundi from 2002 to 2004.	120	Health		Completion	3	Free-standing technical assistance	Burundi	http://www.qhnews.com/newscenter/system/2009/05/06/002736268_01.shtml, Media Report, including Wikileaks; http://www.nhfpc.gov.cn/gjhzs/dyhbz/201308/d084db71bf4c48f1b868562557b2c389.shtml, Government Source (Donor/Recipient)	2							Checked	1	ODA-like	2	Development	1	Active	1							1.13667	0						1	Burundi	516	228	Burundi	BDI	BI	108
288	China	Sports and Office equipment	2002	FALSE	On June 7, 2002, The Chinese embassy in Bujumbura donated 5 computers and 30 sports balls to the University of Burundi. The amount is unknown.	110	Education		Completion	3	Grant	Burundi	http://global.factiva.com/aa/?ref=bbcap00020020607dy67005pl&pp=1&fcpil=en&napc=S&sa_from=, Media Report, including Wikileaks	1		University of Burundi, Academic, Training and Research			University of Burundi, Academic, Training and Research	1	Checked	1	ODA-like	2	Development	1	Active	1	http://global.factiva.com/aa/?ref=bbcap00020020607dy67005pl&pp=1&fcpil=en&napc=S&sa_from=, Media Report, including Wikileaks						1.13667	0		2002-06-07		2002-06-07		1	Burundi	516	228	Burundi	BDI	BI	108
277	China	Debt Relief	2001	FALSE	On April 27, 2001 in Bujumbura, Burundi's External Relations and Cooperation Minister, Mr Severin Ntahomvukiye, and the Chinese ambassador to Burundi, Mr Meng Xianke, signed an agreement for partial remission of a debt to Burundi from China of 37,965, 894,400 BIF. This debt reduction involves five interest-free loans given for economical development activities from 1972 to 1993. The reduction of …	600	Action Relating to Debt		Completion	3	Debt forgiveness	Burundi	http://www.cnnz.gov.cn/bbxq_content/2011-02/17/content_1187064.htm, Government Source (Donor/Recipient); http://global.factiva.com/aa/?ref=bbcapp0020010709dx4t00big&pp=1&fcpil=en&napc=S&sa_from=, Media Report, including Wikileaks	2							Checked	1	ODA-like	2	Development	1	Active	1	http://global.factiva.com/aa/?ref=bbcapp0020010709dx4t00big&pp=1&fcpil=en&napc=S&sa_from=, Media Report, including Wikileaks	37965894400	BIF	0.60139	830.353	7.60282e+07	1.13667	8.64193e+07	4.57226e+07	2001-04-27		2001-04-27		1	Burundi	516	228	Burundi	BDI	BI	108
280	China	Government Assistance Technical Agreement	2001	FALSE	On March 28, 2001, the Chinese vice-minister of foreign affairs, Mr Yang Wenchang, and the head of the Burundi diplomatic service, Mr Severin Ntahomvukiye signed an economic and technical cooperation agreement concerning assistance of 20 million CNY to the Burundi government. The donation will go to projects agreed upon by both parties. The projects financed with this agreement cannot be found.	998	Unallocated / Unspecified		Pipeline: Commitment	11	Grant	Burundi	http://global.factiva.com/aa/?ref=bbcae00020010710dx3s0008o&pp=1&fcpil=en&napc=S&sa_from=, Media Report, including Wikileaks	1							Checked	1	ODA-like	2	Development	1	Active	1	http://global.factiva.com/aa/?ref=bbcae00020010710dx3s0008o&pp=1&fcpil=en&napc=S&sa_from=, Media Report, including Wikileaks	20000000	CNY	0.60139	8.27707	4.01789e+06	1.13667	4.56702e+06	2.41631e+06					1	Burundi	516	228	Burundi	BDI	BI	108
36093	China	9th Chinese medical team	2000	FALSE	China has been sending medical teams to Burundi every two years since 1987. Qinghai Province has been responsible for sending the teams. The 9th medical team of 29 members worked in Burundi from 2000 to 2002.	120	Health		Completion	3	Free-standing technical assistance	Burundi	http://www.qhnews.com/newscenter/system/2009/05/06/002736268_01.shtml, Media Report, including Wikileaks; http://www.nhfpc.gov.cn/gjhzs/dyhbz/201308/d084db71bf4c48f1b868562557b2c389.shtml, Government Source (Donor/Recipient)	2							Checked	1	ODA-like	2	Development	1	Active	1							1.13667	0						1	Burundi	516	228	Burundi	BDI	BI	108
30248	China	China loans Cameroon 70 million RMB for development	2013	FALSE	On June 11, 2013, China and Cameroon signed an agreement in which China agreed to provide Cameroon with an interest-free loan worth about 70 million Yuan to be used in an as-yet-unidentified development capacity.	998	Unallocated / Unspecified		Pipeline: Commitment	11	Loan (excluding debt rescheduling)	Cameroon	http://global.factiva.com/aa/?ref=AFNWS00020130613e96d0016z&pp=1&fcpil=en&napc=S&sa_from=, Media Report, including Wikileaks; http://english.mofcom.gov.cn/article/newsrelease/counselorsoffice/westernasiaandafricareport/201306/20130600160026.shtml, Government Source (Donor/Recipient)	2							Checked	1	ODA-like	2	Development	1	Active	1	http://global.factiva.com/aa/?ref=AFNWS00020130613e96d0016z&pp=1&fcpil=en&napc=S&sa_from=, Media Report, including Wikileaks	70000000	CNY	1.09	6.195	1.03665e+07	1.13667	1.17833e+07						1	Cameroon	471	229	Cameroon	CMR	CM	120
30249	China	China grants Cameroon 4.5 million RMB to promote biodiversity	2013	FALSE	On June 11, 2013, China and Cameroon signed an agreement in which China committed to providing Cameroon with a material gift of 4.5 million Yuan to encourage reforms that focus on preserving biodiversity and sustainably managing natural resources.	410	General Environmental Protection		Pipeline: Commitment	11	Grant	Cameroon	http://global.factiva.com/aa/?ref=AFNWS00020130613e96d0016z&pp=1&fcpil=en&napc=S&sa_from=, Media Report, including Wikileaks; http://english.mofcom.gov.cn/article/newsrelease/counselorsoffice/westernasiaandafricareport/201306/20130600160026.shtml, Government Source (Donor/Recipient)	2							Checked	1	ODA-like	2	Development	1	Active	1	http://global.factiva.com/aa/?ref=AFNWS00020130613e96d0016z&pp=1&fcpil=en&napc=S&sa_from=, Media Report, including Wikileaks	4500000	CNY	1.09	6.195	666415	1.13667	757496						1	Cameroon	471	229	Cameroon	CMR	CM	120
30904	China	Loan for Hospital Upkeep	2013	FALSE	In September 2013, China pledged 5.5 million Yuan (about FCFA 440 million) that will serve as China's technical support for the upkeep of the Yaounde Gynecological and Pediatrics hospital as well as those of Buea and Mbalmayo. Focus will be on assuring the maintenance of hospital equipment and the training of Cameroonian technicians. The two-year (September 19, 2013 to September 18, 2015) mainten…	120	Health		Pipeline: Pledge	12	Loan (excluding debt rescheduling)	Cameroon	http://global.factiva.com/aa/?ref=AFNWS00020130912e99c000gc&pp=1&fcpil=en&napc=S&sa_from=, Media Report, including Wikileaks; http://www.businessincameroon.com/business-in-cameroon/1409-4282-85-billion-chinese-loan-for-cameroon-s-potable-water-supply, Media Report, including Wikileaks	2							Checked	1	Vague (Official Finance)	5	Development	1	Active	1	http://global.factiva.com/aa/?ref=AFNWS00020130912e99c000gc&pp=1&fcpil=en&napc=S&sa_from=, Media Report, including Wikileaks	5500000	CNY	1.09	6.195	814507	1.13667	925829						1	Cameroon	471	229	Cameroon	CMR	CM	120
30903	China	Loan for Potable Water	2013	FALSE	In September 2013, The People's Republic of China pledged 1.059 billion Yuan to finance potable water supply projects in nine cities in the country. But only four cities (Bafoussam, Bamenda, Kribi and Sangmelima) are concerned with the first phase of the project to last 36 months. This consists in 12 months of feasibility studies and conception of the project and 24 months of proper execution.	140	Water Supply and Sanitation		Pipeline: Pledge	12	Loan (excluding debt rescheduling)	Cameroon	http://global.factiva.com/aa/?ref=AFNWS00020130912e99c000gc&pp=1&fcpil=en&napc=S&sa_from=, Media Report, including Wikileaks; http://www.businessincameroon.com/business-in-cameroon/1409-4282-85-billion-chinese-loan-for-cameroon-s-potable-water-supply, Media Report, including Wikileaks	2							Checked	1	Vague (Official Finance)	5	Development	1	Active	1	http://global.factiva.com/aa/?ref=AFNWS00020130912e99c000gc&pp=1&fcpil=en&napc=S&sa_from=, Media Report, including Wikileaks	1059000000	CNY	1.09	6.195	1.5683e+08	1.13667	1.78264e+08						1	Cameroon	471	229	Cameroon	CMR	CM	120
30199	China	China donates anti-malarial drugs to Cameroon	2013	FALSE	In 2013, China donated anti-malarial drugs valued at 300 million Cameroonian francs. The medicine will be administered for free to malaria patients admitted to the country's hospital.	120	Health		Completion	3	Grant	Cameroon	http://en.starafrica.com/news/china-donates-anti-malarial-drugs-to-cameroon.html, Other; http://global.factiva.com/aa/?ref=APASENE020130611e96b000rv&pp=1&fcpil=en&napc=S&sa_from=, Media Report, including Wikileaks; http://dad.synisys.com/dadcameroon/, Government Source (Donor/Recipient)	3							Checked	1	ODA-like	2	Development	1	Active	1	http://global.factiva.com/aa/?ref=APASENE020130611e96b000rv&pp=1&fcpil=en&napc=S&sa_from=, Media Report, including Wikileaks	300000000	XAF	1.09	615.66	447048	1.13667	508147						1	Cameroon	471	229	Cameroon	CMR	CM	120
30905	China	China and Cameroon sign four loan agreements for aircraft, telecomm, and social development	2013	TRUE	In 2013 China's Exim Bank awarded Cameroon a low interest loan of 200.4 billion XAF (408 million USD). This involved four agreements signed by China's Ambassador to Cameroon and Cameroon's Minister of Economic Planning and Regional Development that provided for the purchase of two MA60 Chinese Aircraft (see project ID#35169), to enhance Cameroon's telecommunications technology (see project ID#351…	430	Other Multisector	Communications, Transport and Storage, Water Supply and Sanitation	Implementation	2	Loan (excluding debt rescheduling)	Cameroon	http://global.factiva.com/aa/?ref=DJDN000020131111e9bb002bv&pp=1&fcpil=en&napc=S&sa_from=, Media Report, including Wikileaks; http://dad.synisys.com/dadcameroon_de/frame.jsp?src=deView.faces?sessionid=141399913847031143&MasterID=1&SubModuleID=1&Hierarchy=A1_P_Project&UserID=13&iLanguageID=1&jsf_sequence=1&projectid=847&beansKey=1413999319150, Government Source (Donor/Recipient); http://dad.synisy…	3	Export-Import Bank of China, Government Agency		Export-Import Bank of China, Government Agency	1			Checked	1	Vague (Official Finance)	5	Development	1	Active	1	http://global.factiva.com/aa/?ref=DJDN000020131111e9bb002bv&pp=1&fcpil=en&napc=S&sa_from=, Media Report, including Wikileaks	200000000000	XAF	1.09	615.66	2.98628e+08	1.13667	339442319						1	Cameroon	471	229	Cameroon	CMR	CM	120
35169	China	China provides $408 million export credit to Cameroon to buy 3 MA60 aircraft (linked to #30905)	2013	TRUE	In 2013 China's Exim Bank awarded Cameroon a low interest loan of 200.4 billion XAF (408 million USD). This involved four agreements signed by China's Ambassador to Cameroon and Cameroon's Minister of Economic Planning and Regional Development, one of which provided for a loan to Cameroon to purchase three MA60 Chinese aircraft that were added to the state owned Cameroon Airlines Corporation. The…	210	Transport and Storage		Implementation	2	Export credits	Cameroon	http://global.factiva.com/aa/?ref=DJDN000020131111e9bb002bv&pp=1&fcpil=en&napc=S&sa_from=, Media Report, including Wikileaks; http://dad.synisys.com/dadcameroon/, Government Source (Donor/Recipient); http://cm.mofcom.gov.cn/article/zxhz/sbmy/201211/20121108425874.shtml, Government Source (Donor/Recipient)	3	Export-Import Bank of China, Government Agency	AVIC International Holding Corporation, State-Owned Company	Export-Import Bank of China, Government Agency	1	Cameroon Airlines Corporation, State-Owned Company	1	Checked	1	OOF-like	3	Mixed (Some Development)	6	Active	1	http://global.factiva.com/aa/?ref=DJDN000020131111e9bb002bv&pp=1&fcpil=en&napc=S&sa_from=, Media Report, including Wikileaks						1.13667	0		2013-11-11				1	Cameroon	471	229	Cameroon	CMR	CM	120
30251	China	Rehabilitation of Yaounde Conference Center	2013	FALSE	On June 11, 2013, China and Cameroon signed an accord in which the two sides agreed to conduct feasibility studies for the refurbishment of Yaounde Conference Centre. The two countries exchanged official letters in August. In November 2014, Anhui Construction Engineering Group Overseas, Co., Ltd. held a conference on the design of the rehabilitation. The project is expected to be completed in 18 …	150	Government and Civil Society		Pipeline: Commitment	11	Free-standing technical assistance	Cameroon	http://global.factiva.com/aa/?ref=AFNWS00020130613e96d0016z&pp=1&fcpil=en&napc=S&sa_from=, Media Report, including Wikileaks; http://english.mofcom.gov.cn/article/newsrelease/counselorsoffice/westernasiaandafricareport/201306/20130600160026.shtml, Government Source (Donor/Recipient); http://cm.mofcom.gov.cn/article/zxhz/sbmy/201312/20131200423407.shtml, Government Source (Donor/Recipient); http:/…	5		Anhui Construction Engineering Group, Private Sector	Anhui Construction Engineering Group, Private Sector	1			Checked	1	Vague (Official Finance)	5	Mixed (Some Development)	6	Active	1	http://global.factiva.com/aa/?ref=AFNWS00020130613e96d0016z&pp=1&fcpil=en&napc=S&sa_from=, Media Report, including Wikileaks						1.13667	0						1	Cameroon	471	229	Cameroon	CMR	CM	120
31882	China	China Donate Climate Change Goods to Cameroon	2013	FALSE	On November 18, 2013, Chinese ambassador Wo Ruidi and Cameroonian Minister of Energy Atangaba Kouna Basile signed the handover certificate of the donated goods in response to climate change.	410	General Environmental Protection		Completion	3	Grant	Cameroon	http://cm.mofcom.gov.cn/article/zxhz/sbmy/201311/20131100395974.shtml, Government Source (Donor/Recipient)	1							Checked	1	ODA-like	2	Development	1	Active	1							1.13667	0						1	Cameroon	471	229	Cameroon	CMR	CM	120
31883	China	16th Chinese medical team	2012	FALSE	China has been sending medical teams to Cameroon every two years since 1975. Shanxi Province has been responsible for sending the teams. On August 28, 2012, the 16th medical team of 45 members arrived in Cameroon. 12 of the 45 members are also members of the previous medical team (15th medical team). The team worked at Yaounde Gynaeco-Obstetric and Pediatric Hospital, Mbalmayo District Hospital, …	120	Health	Medical Services	Completion	3	Free-standing technical assistance	Cameroon	http://cm.mofcom.gov.cn/article/zxhz/sbmy/201204/20120408065901.shtml, Government Source (Donor/Recipient); http://www.crtv.cm/cont/nouvelles/nouvelles_sola_fr.php?idField=13788&table=nouvelles&sub=societe, Media Report, including Wikileaks; http://nai.diva-portal.org/smash/get/diva2:399727/FULLTEXT02, Other Academic (Working Paper, Dissertation); http://nai.diva-portal.org/smash/get/diva2:399727…	7							Checked	1	ODA-like	2	Development	1	Active	1							1.13667	0						1	Cameroon	471	229	Cameroon	CMR	CM	120
30188	China	China grants Cameroon CFA 1 billion francs for solar system	2012	FALSE	In 2012, China donated 1.46 billion Cameroonian francs to Cameroon to be used in the construction of a solar street lighting system. The project will be implemented by Huawei Technologies Company, which plans on beginning the project in the capital Yaounde before moving to more rural areas. In 2013 Huawei held a groundbreaking ceremony for the project and installed 409 solar street lights in Yaou…	230	Energy Generation and Supply		Implementation	2	Free-standing technical assistance	Cameroon	http://global.factiva.com/aa/?ref=APASENE020120607e867000p1&pp=1&fcpil=en&napc=S&sa_from=, Media Report, including Wikileaks; http://choforche.wordpress.com/2012/06/12/chinas-boast-to-the-solar-energy-dream-in-cameroon-a-need-for-sustainability-and-transparency-by-chofor-che-12-june-2012/, Other; http://www.investiraucameroun.com/pdf/BC-HS01.pdf, Government Source (Donor/Recipient); http://ases.c…	5	China, Government Agency	Huawei Technologies Co., Ltd., Private Sector	China, Government Agency	1			Checked	1	Vague (Official Finance)	5	Development	1	Active	1	http://global.factiva.com/aa/?ref=APASENE020120607e867000p1&pp=1&fcpil=en&napc=S&sa_from=, Media Report, including Wikileaks	1460000000	XAF	1.1898	526.316	2.33149e+06	1.13667	2.65015e+06	2.774e+06					1	Cameroon	471	229	Cameroon	CMR	CM	120
30166	China	Feasibility Studies for Yabassi Agricultural College	2012	FALSE	In 2011, Cameroon secured assistance from China to conduct a feasibility study for the construction of a public technical high school for agriculture. The site is located in Yabassi and has been examined by the Minister of Secondary Education. The two sides signed a cooperation agreement to fund the school's construction on September 25, 2012 and a second agreement was signed on June 11, 2013; ho…	110	Education		Pipeline: Commitment	11	Free-standing technical assistance	Cameroon	http://global.factiva.com/aa/?ref=AFNWS00020120605e864000t4&pp=1&fcpil=en&napc=S&sa_from=, Media Report, including Wikileaks; http://global.factiva.com.proxy.wm.edu/aa/?ref=APASENE020120926e89q000jk&pp=1&fcpil=en&napc=S&sa_from=, Media Report, including Wikileaks; http://www.minepat.gov.cm/index.php/en/component/k2/item/30-cameroon-china-technical-agricultural-high-school-for-second-generation-ag…	5	China, Government Agency		China, Government Agency	1			Checked	1	ODA-like	2	Development	1	Active	1	http://global.factiva.com/aa/?ref=AFNWS00020120605e864000t4&pp=1&fcpil=en&napc=S&sa_from=, Media Report, including Wikileaks; http://global.factiva.com.proxy.wm.edu/aa/?ref=APASENE020120926e89q000jk&pp=1&fcpil=en&napc=S&sa_from=, Media Report, including Wikileaks	6480000000	XAF	1.1898	526.316	1.0348e+07	1.13667	1.17623e+07	1.2312e+07		2012-05-21			1	Cameroon	471	229	Cameroon	CMR	CM	120
30885	China	Construction of Yabassi Technical High School	2012	FALSE	The People's Republic of China on Tuesday June 11, 2013 reached six agreements with the government of Cameroon to put at the disposal of the latter over FCFA 22 billion to accelerate socio-economic development projects in different sectors of the economy. These include two economic and technical accords, interest-free loans, one to the tune of 100 million Yuans (about FCFA 8 billion) (ID #30246) …	110	Education		Pipeline: Commitment	11	Grant	Cameroon	http://english.mofcom.gov.cn/article/newsrelease/counselorsoffice/westernasiaandafricareport/201306/20130600160026.shtml, Government Source (Donor/Recipient); http://allafrica.com/stories/201306131336.html, Media Report, including Wikileaks; http://www.minepat.gov.cm/index.php/en/component/k2/item/30-cameroon-china-technical-agricultural-high-school-for-second-generation-agriculture, Other	3							Checked	1	ODA-like	2	Development	1	Active	1		100000000	CNY	1.1898	6.32111	1.32964e+07	1.13667	1.51137e+07	1.582e+07					1	Cameroon	471	229	Cameroon	CMR	CM	120
30926	China	China Exim Bank funds road construction between Douala and Yaounde in Cameroon	2012	FALSE	In June 2012 it was reported that China ExIm Bank would lend Cameroon 241.4 billion XAF (451 million USD) to build a 215km road linking Douala on the western coast with capital Yaounde. the total cost of the project is estimated at 284 billion XAF and Chinese financing will cover 85% of the highway's cost. The six-lane highway will be the first new motorway since the country's independence. The p…	210	Transport and Storage		Implementation	2	Loan (excluding debt rescheduling)	Cameroon	http://reports.pr-inside.com/now-available-cameroon-infrastructure-report-r3879810.htm, Media Report, including Wikileaks; http://dad.synisys.com/dadcameroon/, Government Source (Donor/Recipient); http://www.fastmr.com/prod/777751_cameroon_infrastructure_report_q2_2014.aspx, Academic Journal Article; http://www.reuters.com/article/2012/06/30/ozabs-cameroon-china-idAFJOE85T04320120630, Media Repor…	12	Export-Import Bank of China, Government Agency	China First Highway Engineering Company (CFHEC), State-Owned Company	Export-Import Bank of China, Government Agency; China First Highway Engineering Company (CFHEC), State-Owned Company	2			Checked	1	Vague (Official Finance)	5	Development	1	Active	1	http://global.factiva.com.proxy.wm.edu/aa/?ref=CAMEROST20120705e87500003&pp=1&fcpil=en&napc=S&sa_from=, Media Report, including Wikileaks; http://global.factiva.com.proxy.wm.edu/aa/?ref=DJ00000020120628e86s000n7&pp=1&fcpil=en&napc=S&sa_from=, Media Report, including Wikileaks; http://global.factiva.com.proxy.wm.edu/aa/?ref=LBA0000020120630e86u0005c&pp=1&fcpil=en&napc=S&sa_from=, Media Report, inc…	241000000000	XAF	1.1898	526.316	3.85495e+08	1.13667	4.38182e+08	4.5866e+08					1	Cameroon	471	229	Cameroon	CMR	CM	120
31253	China	National broadband network project	2012	FALSE	According to Cameroon's Aid Management System, the China Exim Bank promised 168.3 million USD in loans to Cameroon for the development of a national broadband network. The project began on January 1, 2012, and is ongoing. So far, no money has been disbursed.	220	Communications		Implementation	2	Loan (excluding debt rescheduling)	Cameroon	http://dad.synisys.com/dadcameroon/, Government Source (Donor/Recipient)	1	Export-Import Bank of China, Government Agency	Ministry of Post and Telecommunications, Government Agency; Caisse Autonome d'Amortissement - National Debt Management Agency, Government Agency	Export-Import Bank of China, Government Agency	1	Ministry of Post and Telecommunications, Government Agency; Caisse Autonome d'Amortissement - National Debt Management Agency, Government Agency	2	Checked	1	Vague (Official Finance)	5	Development	1	Active	1		168300000	USD	1.1898	1	1.41453e+08	1.13667	1.60786e+08	168300000	2012-01-01				1	Cameroon	471	229	Cameroon	CMR	CM	120
31246	China	100 million RMB interest-free loan	2011	FALSE	According to Cameroon's Aid Management System, the China Development Bank promised 100 million RMB in interest free loan to Cameroon through an economic and technical cooperation agreement. The exact sector is unclear. This is the third of three such agreements in 2011. (For the other two agreements see Project ID #31245 and Project ID #31243.) The project began on July 20, 2011 and is still ongo…	160	Other Social infrastructure and services		Implementation	2	Loan (excluding debt rescheduling)	Cameroon	http://dad.synisys.com/dadcameroon/, Government Source (Donor/Recipient); http://english.peopledaily.com.cn/90883/8454670.html, Government Source (Donor/Recipient); http://english.peopledaily.com.cn/90883/8454670.html, Government Source (Donor/Recipient); http://cm.mofcom.gov.cn/aarticle/jmxw/201107/20110707658607.html, Government Source (Donor/Recipient); http://www.thelancet.com/journals/lancet…	5	China Development Bank (CDB), Government Agency	Ministry of the Economy, Planning and Regional Development (MINEPAT), Government Agency; Caisse Autonome d'Amortissement - National Debt Management Agency, Government Agency	China Development Bank (CDB), Government Agency	1	Ministry of the Economy, Planning and Regional Development (MINEPAT), Government Agency; Caisse Autonome d'Amortissement - National Debt Management Agency, Government Agency	2	Checked	1	ODA-like	2	Development	1	Active	1		100000000	CNY	1.20634	6.46146	1.28291e+07	1.13667	1.45826e+07	1.54764e+07	2011-07-20				1	Cameroon	471	229	Cameroon	CMR	CM	120
31885	China	China Donate Office Equipment and Teaching Supplies to Two Primary Schools in Cameroon	2011	FALSE	July 20, 2012 China donated office equipment and teaching supplies to two primary schools in Cameroon. The two schools were built by China. Guangdong Heng Shen Import and Export Co., Ltd. is the implementing organization. The project was signed during the Fourth Ministerial Conference of FOCAC in February 2011.	110	Education		Completion	3	Grant	Cameroon	http://cm.mofcom.gov.cn/article/zxhz/sbmy/201207/20120708243876.shtml, Government Source (Donor/Recipient)	1		Guangdong Heng Shen Import and Export Co., Ltd. , Private Sector	Guangdong Heng Shen Import and Export Co., Ltd. , Private Sector	1			Checked	1	ODA-like	2	Development	1	Active	1							1.13667	0						1	Cameroon	471	229	Cameroon	CMR	CM	120
31869	China	Goods Exchange Ceremony were Held in Multipurpose Stadium (Linked to Project ID #31867 #31868)	2011	TRUE	In order to aid with the maintenance of Yaounde's Multipurpose Stadium built by China's Shanxi Construction from 2006-2008 (see project #31867) China donated tools and parts that the stadium needed. A ceremony was held to exchange the goods. The date of this project is unknown.	530	Non-food commodity assistance		Completion	3	Grant	Cameroon	http://cm.mofcom.gov.cn/article/zxhz/hzjj/201111/20111107813658.shtml, Government Source (Donor/Recipient)	1		Shanxi Construction Engineering (Group) Corporation, Public Private Partnership	Shanxi Construction Engineering (Group) Corporation, Public Private Partnership	1			Checked	1	ODA-like	2	Development	1	Active	1							1.13667	0						1	Cameroon	471	229	Cameroon	CMR	CM	120
356	China	Medical equipment and medical supplies	2011	FALSE	On July 20, 2011, China signed an agreement to offer Cameroon batches of medical equipment and supplies for the Gynaecological- Obstetrics and Paediatrics Hospital under construction in Cameroonï¿½s economic port city of Douala amounting to 10 million Yuan (about FCFA 713 million). The two governments also signed documents in which China will supply medical equipment for the anti-malaria fight es…	120	Health		Pipeline: Commitment	11	Grant	Cameroon	http://global.factiva.com/aa/?ref=CHNDLY0020110720e77l0001c&pp=1&fcpil=en&napc=S&sa_from=, Media Report, including Wikileaks; http://news.cameroon-today.com/cameroon-china-sign-cooperation-agreements-in-beijing/7299/, Media Report, including Wikileaks; http://cm.mofcom.gov.cn/aarticle/jmxw/201107/20110707658607.html, Government Source (Donor/Recipient); http://www.thelancet.com/journals/lancet/ar…	4							Checked	1	ODA-like	2	Development	1	Active	1	http://global.factiva.com/aa/?ref=CHNDLY0020110720e77l0001c&pp=1&fcpil=en&napc=S&sa_from=, Media Report, including Wikileaks	11500000	CNY	1.20634	6.46146	1.47535e+06	1.13667	1.67699e+06	1.77978e+06					1	Cameroon	471	229	Cameroon	CMR	CM	120
31833	China	Shenzhen Troupe Performs in Cameroon	2011	FALSE	In 2011 the Shenzhen Troupe toured Africa and made a performance in Cameroon. This was part of a cultural showcase to display good relations between China and Cameroon.	430	Other Multisector		Completion	3	Grant	Cameroon	http://cm.mofcom.gov.cn/article/zxhz/hzjj/201108/20110807676908.shtml, Government Source (Donor/Recipient); http://www.africa-invest.net/index.php?m=content&c=index&a=show&catid=50&id=537, Media Report, including Wikileaks	2							Checked	1	OOF-like	3	Representational	3	Active	1							1.13667	0						1	Cameroon	471	229	Cameroon	CMR	CM	120
31245	China	50 million RMB donation for economic and technical development	2011	FALSE	According to Cameroon's Aid Management System, the China Development Bank promised 50 million RMB grant for economic and technical development in Cameroon. The exact sector is unclear. This is the second of three such agreements in 2011. (For the other two agreements see Project ID #31246 and Project ID #31243.) The project began on July 20, 2011, and was completed on December 31, 2012. So far, 5…	998	Unallocated / Unspecified		Completion	3	Loan (excluding debt rescheduling)	Cameroon	http://dad.synisys.com/dadcameroon/, Government Source (Donor/Recipient); http://english.peopledaily.com.cn/90883/8454670.html, Government Source (Donor/Recipient); http://english.peopledaily.com.cn/90883/8454670.html, Government Source (Donor/Recipient); http://www.thelancet.com/journals/lancet/article/PIIS0140-6736(14)60725-X/fulltext#article_upsell, Academic Journal Article; http://cm.mofcom.g…	5	China Development Bank (CDB), Government Agency	Caisse Autonome d'Amortissement - National Debt Management Agency, Government Agency; Ministry of the Economy, Planning and Regional Development (MINEPAT), Government Agency	China Development Bank (CDB), Government Agency	1	Caisse Autonome d'Amortissement - National Debt Management Agency, Government Agency; Ministry of the Economy, Planning and Regional Development (MINEPAT), Government Agency	2	Checked	1	OOF-like	3	Development	1	Active	1		50000000	CNY	1.20634	6.46146	6.41457e+06	1.13667	7.29128e+06	7.73819e+06	2011-07-20		2012-12-31		1	Cameroon	471	229	Cameroon	CMR	CM	120
31243	China	CBD offers 433 million RMB loan for economic and technical development	2011	FALSE	According to Cameroon's Aid Management System, the China Development Bank promised 433 million RMB preferential loan Cameroon through an economic and technical cooperation agreement in 2011. The money is to go toward a government e-post project according to a Cameroonian news source. This agreement was signed July 22, 2011. Two other agreements were signed at the same time (see Project ID #31245 …	150	Government and Civil Society		Completion	3	Loan (excluding debt rescheduling)	Cameroon	http://dad.synisys.com/dadcameroon/, Government Source (Donor/Recipient); http://english.peopledaily.com.cn/90883/8454670.html, Government Source (Donor/Recipient); http://www.thelancet.com/journals/lancet/article/PIIS0140-6736(14)60725-X/fulltext#article_upsell, Academic Journal Article; http://news.cameroon-today.com/cameroon-china-sign-cooperation-agreements-in-beijing/7299/, Media Report, inc…	5	China Development Bank (CDB), Government Agency	Ministry of the Economy, Planning and Regional Development (MINEPAT), Government Agency; Caisse Autonome d'Amortissement - National Debt Management Agency, Government Agency	China Development Bank (CDB), Government Agency	1	Ministry of the Economy, Planning and Regional Development (MINEPAT), Government Agency; Caisse Autonome d'Amortissement - National Debt Management Agency, Government Agency	2	Checked	1	OOF-like	3	Development	1	Active	1		433000000	CNY	1.20634	6.46146	5.55502e+07	1.13667	6.31424e+07	6.70127e+07	2011-01-12		2012-12-31		1	Cameroon	471	229	Cameroon	CMR	CM	120
349	China	Low-cost housing units	2011	FALSE	On January 12, 2011, the Export-Import Bank of China signed agreements for two project loans, including 33 billion CFA francs for building 1,500 low-cost housing units. According to Cameroon's Development Assistance Database, China Exim Bank has disbursed 21.1 million USD for the project.	160	Other Social infrastructure and services	Housing Construction	Implementation	2	Loan (excluding debt rescheduling)	Cameroon	http://forex.cnfol.com/110113/134,1506,9154029,00.shtml, Media Report, including Wikileaks; http://global.factiva.com/aa/?ref=DJCS000020110113e71d0000w&pp=1&fcpil=en&napc=S&sa_from=, Media Report, including Wikileaks; http://www.chinadaily.com.cn/cndy/2012-09/25/content_15779670.htm, Media Report, including Wikileaks; http://origin-www.bloomberg.com/news/2011-01-13/china-to-lend-cameroon-funding-…	5	Export-Import Bank of China, Government Agency		Export-Import Bank of China, Government Agency	1	Ministry of Works and Urban Development, Government Agency	1	Checked	1	Vague (Official Finance)	5	Development	1	Active	1	http://global.factiva.com/aa/?ref=DJCS000020110113e71d0000w&pp=1&fcpil=en&napc=S&sa_from=, Media Report, including Wikileaks	33000000000	XAF	1.20634	471.866	5.79727e+07	1.13667	6.58961e+07	6.99351e+07	2011-10-01				1	Cameroon	471	229	Cameroon	CMR	CM	120
289	China	Memve'ele Dam	2011	FALSE	Cameroon's President Paul Biya signed a financial agreement between the China International Water and Electrical Corporation and the Cameroon mining, water and energy ministry. The first of the dams to begin implementation, the Memve'ele Dam in Nyabizan, will cost a combined FCFA 420 billion. The project is jointly financed by Eximbank China through a FCFA 243 billion loan solely for the construc…	230	Energy Generation and Supply		Implementation	2	Loan (excluding debt rescheduling)	Cameroon	http://www.cameroononline.org/2012/06/15/construction-of-memeveele-hydroelectric-project-officially-begins/, Media Report, including Wikileaks; http://www.terradaily.com/reports/Work_begins_on_China-backed_hydroelectric_dam_in_Cameroon_999.html, Media Report, including Wikileaks; http://global.factiva.com/aa/?ref=XIFINN0020031009dza900038&pp=1&fcpil=en&napc=S&sa_from=, Media Report, including Wik…	8		Sinohydro Corporation, State-Owned Company; China International Water and Electrical Corporation, State-Owned Company	Sinohydro Corporation, State-Owned Company; China International Water and Electrical Corporation, State-Owned Company	2	Cameroon Ministry of Mining, Water, and Energy, Government Agency	1	Checked	1	Vague (Official Finance)	5	Development	1	Active	1	http://global.factiva.com/aa/?ref=XIFINN0020031009dza900038&pp=1&fcpil=en&napc=S&sa_from=, Media Report, including Wikileaks; http://global.factiva.com.proxy.wm.edu/aa/?ref=AFNWS00020120620e86j000kg&pp=1&fcpil=en&napc=S&sa_from=, Media Report, including Wikileaks	480237154	USD	1.20634	1	3.98093e+08	1.13667	452501489	480237154	2012-06-15			2017-01-01	1	Cameroon	471	229	Cameroon	CMR	CM	120
1030	China	Preferential Loan for Electronic Postal Program	2011	FALSE	On May 21, 2011, the Export-Import Bank of China Deputy Governor Zhu Xinqiang and Cameroon's Minister of Economic Planning and Territorial Management, Louis Paul Motaze, signed an agreement for a $62 million concessional loan for an electronic postal program. The program includes a data center, data communications network, internal communications systems, customer service systems, and a business …	150	Government and Civil Society		Implementation	2	Loan (excluding debt rescheduling)	Cameroon	http://www.mofcom.gov.cn/aarticle/i/jyjl/k/201107/20110707658605.html, Government Source (Donor/Recipient); http://www.asianews.co/cameroon-to-launch-e-post-project-funded-by-china/, Media Report, including Wikileaks; http://dad.synisys.com/dadcameroon/, Government Source (Donor/Recipient); http://www.voanews.com/content/china-opening-bus-assembly-plant-in-cameroon--89119202/114675.html, Media Re…	8	Export-Import Bank of China, Government Agency	Huawei Technologies Co., Ltd., Private Sector	Huawei Technologies Co., Ltd., Private Sector; Export-Import Bank of China, Government Agency	2	CAMPOST, State-Owned Company	1	Checked	1	Vague (Official Finance)	5	Development	1	Active	1		65558382	USD	1.20634	1	5.43446e+07	1.13667	6.17721e+07	65558382	2011-07-21				1	Cameroon	471	229	Cameroon	CMR	CM	120
35583	China	Interest-free loan for economic and technical cooperation	2010	FALSE	During a visit from 23 to 25 March 2010 by Jia Qinglin, the Chairman of the Chinese People's Political Consultative Conference in China, several accords were signed for a total sum of XAF 12.645 billion. These projects were for: i) a loan of around XAF 6.245 billion for a refurbishment project and provision of materials to Matgenie (national civil engineering equipment park); ii) an interest-free…	998	Unallocated / Unspecified		Pipeline: Commitment	11	Loan (excluding debt rescheduling)	Cameroon	http://www.africaneconomicoutlook.org/countries/central-africa/cameroon/, Other Official Source (non-Donor, non-Recipient); http://opendocs.ids.ac.uk/opendocs/bitstream/handle/123456789/1695/AFRODAD-%20322481.pdf?sequence=1, NGO/Civil Society/Advocacy; http://journals.sub.uni-hamburg.de/giga/jcca-cds/article/viewFile/223/223, Other Academic (Working Paper, Dissertation); http://www.entrepreneurne…	4							Checked	1	ODA-like	2	Development	1	Active	1		50000000	CNY	1.07564	6.77027	6.86587e+06	1.13667	7.80426e+06	7.38523e+06					1	Cameroon	471	229	Cameroon	CMR	CM	120
347	China	Debt Cancellation	2010	FALSE	On August 13, 2010, Cameroon Finance Minister Essimi Menye and Chinese Ambassador to Cameroon Xue Jinwei signed a cooperative agreement in Yaounde to cancel 21 million XAF of Cameroon's debt to China.	600	Action Relating to Debt		Completion	3	Debt forgiveness	Cameroon	http://cn.wsj.com/gb/20100816/baf103657.asp?source=rss, Media Report, including Wikileaks; http://global.factiva.com/aa/?ref=APASENE020100814e68e0002v&pp=1&fcpil=en&napc=S&sa_from=, Media Report, including Wikileaks; http://news.xinhuanet.com/english/china/2014-07/10/c_133474011.htm, Government Source (Donor/Recipient)	3							Checked	1	ODA-like	2	Development	1	Active	1	http://global.factiva.com/aa/?ref=APASENE020100814e68e0002v&pp=1&fcpil=en&napc=S&sa_from=, Media Report, including Wikileaks	21000000	XAF	1.07564	495.277	39418.8	1.13667	44806.2	42400.5	2010-08-13		2010-08-13		1	Cameroon	471	229	Cameroon	CMR	CM	120
22595	China	Rehabilitate MATGENIE	2010	FALSE	During a visit from 23 to 25 March 2010 by Jia Qinglin, the Chairman of the Chinese People's Political Consultative Conference in China, a loan was signed of around 13 million USD for a refurbishment project and provision of materials to rehabilitate the National Civil Engineering Pool (MATGENIE). One source indicates that the agreement entailed provision of preferential buyer credit of the proje…	150	Government and Civil Society		Completion	3	Export credits	Cameroon	http://news.cameroon-today.com/cameroon-government-buys-120-road-construction-caterpillars-from-china/5486/, Media Report, including Wikileaks; http://www.businessincameroon.com/categories/53-news/241-china-cameroon-a-win-win-partnership, Media Report, including Wikileaks; http://www.accessmylibrary.com/article-1G1-222396243/china-gives-cameroon-over.html, Media Report, including Wikileaks; http:…	5	Export-Import Bank of China, Government Agency		Export-Import Bank of China, Government Agency	1	Matgenie (National Civil Engineering Equipment Pool), State-Owned Company	1	Checked	1	OOF-like	3	Mixed (Some Development)	6	Active	1		13496049	USD	1.07564	1	1.2547e+07	1.13667	1.42618e+07	13496049	2010-03-24		2012-12-31		1	Cameroon	471	229	Cameroon	CMR	CM	120
31819	China	15th Chinese medical team	2010	FALSE	China has been sending medical teams to Cameroon every two years since 1975. Shanxi Province has been responsible for sending the teams. In 2010, the 15th medical team of 46 members arrived in Cameroon. The team worked at Yaounde Gynaeco-Obstetric and Pediatric Hospital, Mbalmayo District Hospital, and Guider District Hospital for two years.	120	Health	Health	Completion	3	Free-standing technical assistance	Cameroon	http://cm.mofcom.gov.cn/article/zxhz/hzjj/201208/20120808314014.shtml, Government Source (Donor/Recipient); http://cm.mofcom.gov.cn/article/zxhz/hzjj/201209/20120908319381.shtml, Government Source (Donor/Recipient); http://cm.mofcom.gov.cn/article/zxhz/zzjg/201110/20111007771520.shtml, Government Source (Donor/Recipient); http://www.moh.gov.cn/gjhzs/dyhbz/201308/f2f7fff75cf14e269ad6aedb3d0f4980.s…	4							Checked	1	ODA-like	2	Development	1	Active	1							1.13667	0						1	Cameroon	471	229	Cameroon	CMR	CM	120
339	China	Grant for Economic and Technical Cooperation	2010	FALSE	In March 2010 Jia Qinglin and President Paul Biya signed a series of agreements including a grant. Media sources report that the value of the grant was 65 million USD, but Cameroon's Development Assistance Database lists the commitment at 14,632,505. According to the database, 4.5 million USD has been disbursed. Another source describes the grant as a 'a gift of XAF 3.2 billion for economic and t…	998	Unallocated / Unspecified		Implementation	2	Grant	Cameroon	http://www.voanews.com/content/china-opening-bus-assembly-plant-in-cameroon--89119202/114675.html, Media Report, including Wikileaks; http://finance.sina.com.cn/roll/20100325/13027631878.shtml, Media Report, including Wikileaks; http://dad.synisys.com/dadcameroon/, Government Source (Donor/Recipient); http://www.africaneconomicoutlook.org/countries/central-africa/cameroon/, Other Official Source …	4							Checked	1	ODA-like	2	Development	1	Active	1		14632505	USD	1.07564	1	1.36035e+07	1.13667	1.54627e+07	14632505					1	Cameroon	471	229	Cameroon	CMR	CM	120
31230	China	China Exim Bank loans 31.832 million USD to Cameroon for additional CDMA project	2010	FALSE	According to Cameroon's Aid Management System, the China Exim Bank promised 31,832,494 USD in loans to Cameroon for the supply, installation, and commission of additional 350 K CDMA project. The project began on January 1, 2010, and is ongoing. So far, none of the money has been disbursed.	220	Communications		Implementation	2	Loan (excluding debt rescheduling)	Cameroon	http://dad.synisys.com/dadcameroon/, Government Source (Donor/Recipient)	1	Export-Import Bank of China, Government Agency	Ministry of Post and Telecommunications, Government Agency; Caisse Autonome d'Amortissement - National Debt Management Agency, Government Agency	Export-Import Bank of China, Government Agency	1	Ministry of Post and Telecommunications, Government Agency; Caisse Autonome d'Amortissement - National Debt Management Agency, Government Agency	2	Checked	1	Vague (Official Finance)	5	Development	1	Active	1		31832494	USD	1.07564	1	2.95939e+07	1.13667	3.36386e+07	31832494	2010-01-01				1	Cameroon	471	229	Cameroon	CMR	CM	120
350	China	Construction of seaport via loan	2010	FALSE	On January 12, 2011 China Eximbank signed an agreement for a 423 million USD loan for the construction of the Kribi Deep Seaport project in the Atlantic coast town of Kribi,300 km south of Yaounde. The package represents about 85 per cent of the projects' original total costs, the rest of which was supposed to come from the State but was later renegotiated so that the state did not pay for it. Ch…	210	Transport and Storage		Implementation	2	Loan (excluding debt rescheduling)	Cameroon	http://allafrica.com/stories/201201040734.html, Media Report, including Wikileaks; http://forex.cnfol.com/110113/134,1506,9154029,00.shtml, Media Report, including Wikileaks; http://global.factiva.com/aa/?ref=AFNWS00020110113e71d000i5&pp=1&fcpil=en&napc=S&sa_from=, Media Report, including Wikileaks; http://global.factiva.com/aa/?ref=AFNWS00020120213e82d001e0&pp=1&fcpil=en&napc=S&sa_from=, Media R…	7	Export-Import Bank of China, Government Agency	China National Electric Equipment Corporation (CNEEC), State-Owned Company; China Harbour Engineering Company Limited, State-Owned Company	Export-Import Bank of China, Government Agency; China National Electric Equipment Corporation (CNEEC), State-Owned Company; China Harbour Engineering Company Limited, State-Owned Company	3			Checked	1	Vague (Official Finance)	5	Development	1	Active	1	http://global.factiva.com/aa/?ref=AFNWS00020110113e71d000i5&pp=1&fcpil=en&napc=S&sa_from=, Media Report, including Wikileaks; http://global.factiva.com/aa/?ref=AFNWS00020120213e82d001e0&pp=1&fcpil=en&napc=S&sa_from=, Media Report, including Wikileaks	423000000	USD	1.07564	1	3.93253e+08	1.13667	4.47e+08	423000000	2010-10-01			2014-06-10	1	Cameroon	471	229	Cameroon	CMR	CM	120
505	China	Loan for a new hydroelectric dam on the River Dja	2010	FALSE	In January 2010, China National Electric Equipment Corp. signed an agreement with Cameroon to construct the 12 MW Mekin dam on the Mekin and Dja rivers. The dam was expected to take three years to build, and hold an estimated 940 million cubic meters of water, and provide power, as well as a yearly output of 500 metric tons of fish. The total cost of the project was expected to be $58 million, an…	230	Energy Generation and Supply	Electricity; Hydro-generation	Implementation	2	Loan (excluding debt rescheduling)	Cameroon	http://global.factiva.com/aa/?ref=DJI0000020100107e61700183&pp=1&fcpil=en&napc=S&sa_from=, Media Report, including Wikileaks; http://allafrica.com/stories/201305311375.html, Media Report, including Wikileaks	2	Export-Import Bank of China, Government Agency	China National Electric Equipment Corporation (CNEEC), State-Owned Company	Export-Import Bank of China, Government Agency; China National Electric Equipment Corporation (CNEEC), State-Owned Company	2			Checked	1	OOF-like	3	Development	1	Active	1	http://global.factiva.com/aa/?ref=DJI0000020100107e61700183&pp=1&fcpil=en&napc=S&sa_from=, Media Report, including Wikileaks	22000000000	XAF	1.07564	495.277	4.12958e+07	1.13667	4.69399e+07	4.44196e+07					1	Cameroon	471	229	Cameroon	CMR	CM	120
31242	China	Economic and technical cooperation agreement	2010	FALSE	According to Cameroon's Aid Management System, the China Development Bank promised 2,799,983 USD in loans or grants (flow type uncertain) to Cameroon through an economic and technical cooperation agreement. The exact sector is unclear. The project began on December 28, 2010, and was completed on December 31, 2012. So far, 2,734,731 USD has been disbursed.	430	Other Multisector		Completion	3	Vague TBD	Cameroon	http://dad.synisys.com/dadcameroon/, Government Source (Donor/Recipient)	1	China Development Bank (CDB), Government Agency	Ministry of the Economy, Planning and Regional Development (MINEPAT), Government Agency; Caisse Autonome d'Amortissement - National Debt Management Agency, Government Agency	China Development Bank (CDB), Government Agency	1	Ministry of the Economy, Planning and Regional Development (MINEPAT), Government Agency; Caisse Autonome d'Amortissement - National Debt Management Agency, Government Agency	2	Checked	1	OOF-like	3	Development	1	Active	1		2799983	USD	1.07564	1	2.60308e+06	1.13667	2.95885e+06	2799983	2010-12-28		2012-12-31		1	Cameroon	471	229	Cameroon	CMR	CM	120
31868	China	Chinese Team Provides Technical Assistance to Yaounde's Multipurpose Stadium Staff	2009	TRUE	In 2009 China began a program to follow up on their construction of the multipurpose stadium built by Shanxi Construction in Yaounde from 2006-2008 (See project ID#31867) through technical training for managing the facilities. This consisted of two phases 2, each lasting two years. The first phase was from 2009-2011 and on September 25, 2012, China and Cameroon signed an agreement to provide the …	160	Other Social infrastructure and services	Technical Training	Implementation	2	Free-standing technical assistance	Cameroon	http://cm.mofcom.gov.cn/article/zxhz/hzjj/201012/20101207333653.shtml, Government Source (Donor/Recipient); https://www.cameroon-tribune.cm/index2.php/components/com_comment/index.php?option=com_content&view=article&id=62103%3Acooperation-chine-afrique-la-part-du-cameroun&catid=3%3Adossier-de-la-redaction&Itemid=2&limitstart=4, Media Report, including Wikileaks; http://dad.synisys.com/dadcameroon…	6	China Development Bank (CDB), Government Agency	Ministry of Social Security of Khartoum State, Government Agency; Caisse Autonome d'Amortissement - National Debt Management Agency, Government Agency; Shanxi Construction Engineering (Group) Corporation, Public Private Partnership	China Development Bank (CDB), Government Agency; Shanxi Construction Engineering (Group) Corporation, Public Private Partnership	2			Checked	1	OOF-like	3	Mixed (Some Development)	6	Active	1		6900000	CNY	1	6.83142	1.01004e+06	1.13667	1.14809e+06	1.01004e+06					1	Cameroon	471	229	Cameroon	CMR	CM	120
31887	China	China donates 2 million RMB of anti-malarial drugs to Cameroon	2009	FALSE	On August 3, 2009, China and Cameroon signed agreements on the donation of 2 million RMB for the purchase and shipping of a batch of anti-malaria drugs.	120	Health	for the purchase ans shipping of a batch of anti-malaria drugs	Pipeline: Commitment	11	Grant	Cameroon	http://cm.mofcom.gov.cn/article/zxhz/sbmy/200908/20090806483516.shtml, Government Source (Donor/Recipient); http://www.thelancet.com/journals/lancet/article/PIIS0140-6736(14)60725-X/fulltext#article_upsell, Academic Journal Article; http://www.ccs.org.za/wp-content/uploads/2009/11/CCS-Central-Africa-Briefing-Paper-August-2009.pdf, Other Academic (Working Paper, Dissertation)	3							Checked	1	ODA-like	2	Development	1	Active	1		2000000	CNY	1	6.83142	292765	1.13667	332778	292765					1	Cameroon	471	229	Cameroon	CMR	CM	120
30190	China	Chinese grant CFA 800m for Cameroon water project	2009	FALSE	In 2012, Cameroon accepted a grant of 800 million Cameroonian francs to be used in the construction of modern wells in the northern part of the country. Currently, there are plans for eighty-four wells to be constructed in eight months by Gansu Geo-Engineering Corporation. The groundbreaking ceremony was held September 19, 2012. According to a report from the Chinese Embassy, this aid was agreed …	140	Water Supply and Sanitation		Implementation	2	Grant	Cameroon	http://global.factiva.com.proxy.wm.edu/aa/?ref=APASENE020120807e887000xe&pp=1&fcpil=en&napc=S&sa_from=, Media Report, including Wikileaks; http://www.gsgec.com/art_read.aspx?id=565, Implementing/Intermediary Agency Source; http://cm.mofcom.gov.cn/article/zxhz/hzjj/201209/20120908352945.shtml, Government Source (Donor/Recipient)	3		Gansu Geo-Engineering Co. Ltd.	Gansu Geo-Engineering Co. Ltd.	1			Checked	1	ODA-like	2	Development	1	Active	1	http://global.factiva.com.proxy.wm.edu/aa/?ref=APASENE020120807e887000xe&pp=1&fcpil=en&napc=S&sa_from=, Media Report, including Wikileaks	800000000	XAF	1	472.186	1.69425e+06	1.13667	1.92581e+06	1.69425e+06					1	Cameroon	471	229	Cameroon	CMR	CM	120
22850	China	Malaria research center	2009	FALSE	In 2009, China donated a malaria research center housed by Yaounde's Hospital of Gynecology, Obstetrics, and Pediatrics. The center cost $400,000 and was inaugurated in March 26, 2009. According to a 2011 Working Series report, the anti-malaria medical center started to operate on 26 March 2009 . After the establishment of the anti-malaria center, Chinese experts could set up and test the facilit…	120	Health		Completion	3	Grant	Cameroon	http://www.ccs.org.za/wp-content/uploads/2009/11/CCS-Central-Africa-Briefing-Paper-August-2009.pdf, Other Academic (Working Paper, Dissertation); http://jjhzj.mofcom.gov.cn/article/y/200903/20090306135897.shtml, Government Source (Donor/Recipient); http://jjhzj.mofcom.gov.cn/article/y/200904/20090406161531.shtml, Government Source (Donor/Recipient); http://nai.diva-portal.org/smash/get/diva2:3997…	5							Checked	1	ODA-like	2	Development	1	Active	1		400000	USD	1	1	400000	1.13667	454669	400000			2009-03-01		1	Cameroon	471	229	Cameroon	CMR	CM	120
31888	China	China Loans 208 million Yuan for Limbe and Bafoussam Stadiums	2009	FALSE	On August 3, 2009 China signed a concessional loan agreement with Cameroon for the construction of the Limbe and Bafoussam Stadiums. According to the agreement, China will offer 280 million RMB to Cameroon for construction. This contract was a revision of the original contract with CMEC in 2008. Each stadium will seat approximately 20000 people. CMEC is responsible for the design, materials, cons…	160	Other Social infrastructure and services		Implementation	2	Loan (excluding debt rescheduling)	Cameroon	http://cm.mofcom.gov.cn/article/zxhz/sbmy/200908/20090806483521.shtml, Government Source (Donor/Recipient); http://www.sinomach.com.cn/templates/T_news_en/content.aspx?nodeid=924&page=ContentPage&contentid=37603, Media Report, including Wikileaks; https://www.cameroon-tribune.cm/index.php?option=com_content&view=article&id=84791:stade-de-limbe-le-terrain-dentrainement-attendu&catid=6:sport&Itemid…	6		China Machinery Engineering Corporation (CMEC)	China Machinery Engineering Corporation (CMEC)	1			Checked	1	Vague (Official Finance)	5	Development	1	Active	1		280000000	CNY	1	6.83142	4.09871e+07	1.13667	4.6589e+07	4.09871e+07					1	Cameroon	471	229	Cameroon	CMR	CM	120
31229	China	Douala water supply project Phase II	2009	FALSE	According to Cameroon's Aid Management System, the China Exim Bank promised 97,130,000 USD in loans to Cameroon for Phase II of Douala water supply project. The project began on May 11, 2009, and has an end date of May 11, 2012, but is coded as ongoing in Cameroon's Aid Management System. So far, 62,845,200 USD has been disbursed.	230	Energy Generation and Supply		Implementation	2	Loan (excluding debt rescheduling)	Cameroon	http://dad.synisys.com/dadcameroon/, Government Source (Donor/Recipient); http://www.africaneconomicoutlook.org/countries/central-africa/cameroon/, Other Official Source (non-Donor, non-Recipient)	2	Export-Import Bank of China, Government Agency	Ministry of Energy and Water Resources, Government Agency; Caisse Autonome d'Amortissement - National Debt Management Agency, Government Agency	Export-Import Bank of China, Government Agency	1	Ministry of Energy and Water Resources, Government Agency; Caisse Autonome d'Amortissement - National Debt Management Agency, Government Agency	2	Checked	1	Vague (Official Finance)	5	Development	1	Active	1		97130000	USD	1	1	97130000	1.13667	1.10405e+08	97130000	2009-05-11			2012-05-11	1	Cameroon	471	229	Cameroon	CMR	CM	120
344	China	Loan for water distribution project	2009	FALSE	The project began in December 30, 2009, when the Cameroonian Ministry of Energy and Water Resources signed an agreement with a Chinese firm, China Machinery & Equipment Import Export Corporation (CMEC) to carryout a 16 month feasibility study for a project to supply the city of Yaounde with potable water from River Sanaga. On December 15, 2010 Cameroon secured a 366 billion CFA franc loan from th…	140	Water Supply and Sanitation		Implementation	2	Loan (excluding debt rescheduling)	Cameroon	http://global.factiva.com/redir/default.aspx?P=sa&an=AFNWS00020100204e6240010z&cat=a&ep=ASE, Media Report, including Wikileaks; http://www.foods1.com/content/1118278/, Implementing/Intermediary Agency Source; http://af.reuters.com/article/topNews/idAFJOE6BE0DO20101215, Media Report, including Wikileaks	3	Export-Import Bank of China, Government Agency	China Machinery Engineering Corporation (CMEC)	China Machinery Engineering Corporation (CMEC) ; Export-Import Bank of China, Government Agency	2			Checked	1	Vague (Official Finance)	5	Development	1	Active	1	http://global.factiva.com/redir/default.aspx?P=sa&an=AFNWS00020100204e6240010z&cat=a&ep=ASE, Media Report, including Wikileaks	366000000000	XOF	1	472.186	7.75118e+08	1.13667	8.81056e+08	7.75118e+08		2011-01-01		2013-05-01	1	Cameroon	471	229	Cameroon	CMR	CM	120
974	China	Mekin Hydropower Station	2009	FALSE	On March 16, 2008 at a ceremony between Zhao Ruolin, president of CNEEC, and Sand Jean Bernard, secretary of Cameroon's Department of Energy and Water Resources. China National Electric Equipment Corporation (CNEC) won a contract to build the Mekin Hydropower station. China National Machinery Industry Corp. won the EPC contract for the power station in 2009. $49 million USD worth of funding for t…	230	Energy Generation and Supply	Electricity; Hydro-generation	Implementation	2	Loan (excluding debt rescheduling)	Cameroon	http://www.cneec.com.cn/NewsCenter/NewsCenter/CNEECNews/200904/522.html, Other Official Source (non-Donor, non-Recipient); http://camerexpress.org/wp/?p=411, Other; http://www.cneec.com.cn/NewsCenter/NewsCenter/CNEECNews/200904/522.html, Other Official Source (non-Donor, non-Recipient); http://www.fmprc.gov.cn/eng/wjb/zzjg/fzs/gjlb/2949/t16478.htm, Government Source (Donor/Recipient); http://blue…	9	Export-Import Bank of China, Government Agency; China National Electric Engineering Co., Ltd., State-Owned Company; China National Electric Engineering Co., Ltd., State-Owned Company	Ministry of Energy and Water Resources, Government Agency; China Machinery Engineering Corporation (CMEC)	Export-Import Bank of China, Government Agency; China National Electric Engineering Co., Ltd., State-Owned Company; China National Electric Engineering Co., Ltd., State-Owned Company; China Machinery Engineering Corporation (CMEC)	4	Ministry of Energy and Water Resources, Government Agency	1	Checked	1	Vague (Official Finance)	5	Development	1	Active	1	http://global.factiva.com/aa/?ref=BBCAPP0020100109e619001rx&pp=1&fcpil=en&napc=S&sa_from=, Media Report, including Wikileaks	49000000	USD	1	1	49000000	1.13667	5.5697e+07	49000000	2010-07-01	2009-03-01	2014-07-01		1	Cameroon	471	229	Cameroon	CMR	CM	120
31875	China	14th Chinese medical team	2008	FALSE	China has been sending medical teams to Cameroon every two years since 1975. Shanxi Province has been responsible for sending the teams. On July 12, 2008, the 14th medical team of 46 members arrived in Cameroon. The team worked at Yaounde Gynaeco-Obstetric and Pediatric Hospital, Mbalmayo District Hospital, and Guider District Hospital for two years.	120	Health	Medical Services	Completion	3	Free-standing technical assistance	Cameroon	http://cm.mofcom.gov.cn/article/zxhz/hzjj/200803/20080305455606.shtml, Government Source (Donor/Recipient); http://www.fmprc.gov.cn/mfa_chn/wjdt_611265/zwbd_611281/t476488.shtml, Government Source (Donor/Recipient); http://www.sxswst.gov.cn/Bureau/xxgkContent.asp?fid=104&UnitID=1, Government Source (Donor/Recipient); http://govinfo.nlc.gov.cn/sxsfz/xxgk/sxswst/201009/t20100929_354173.html?classid…	9							Checked	1	ODA-like	2	Development	1	Active	1							1.13667	0						1	Cameroon	471	229	Cameroon	CMR	CM	120
31719	China	Agriculture Technology Demonstration Center in Nanga-Eboko	2008	FALSE	During the 2006 Forum on China Africa Cooperation conference, Beijing promised to construct 15 agricultural technology demonstration centers in Africa. One of these centers was built in Nanga-Eboko, Cameroon by Shaanxi Agriculture Group. A signing ceremony for the agreement took place on January 10, 2008 between Vice Prime Minister and Minister of Agricultural and Rural Development, Jean Nkuete a…	310	Agriculture, Forestry and Fishing		Completion	3	Free-standing technical assistance	Cameroon	https://www.cameroon-tribune.cm/index2.php/components/com_comment/index.php?option=com_content&view=article&id=62103%3Acooperation-chine-afrique-la-part-du-cameroun&catid=3%3Adossier-de-la-redaction&Itemid=2&limitstart=5, Media Report, including Wikileaks; http://www.iprcc.org/userfiles/file/Li%20Jiali-EN.pdf, Government Source (Donor/Recipient); http://www.cgdev.org/sites/default/files/Brautigam…	7		Shaanxi Agriculture Group, State-Owned Company	Shaanxi Agriculture Group, State-Owned Company	1			Checked	1	ODA-like	2	Development	1	Active	1							1.13667	0		2009-07-02				1	Cameroon	471	229	Cameroon	CMR	CM	120
31835	China	Technical Training Programs in Yaounde Conference Center	2008	FALSE	The Chinese government helped Cameroon to build the Yaounde Conference Center from 1978 to 1981. China has been sending technical support to the conference center ever since. In October 2008, the 12th Chinese technical team held a 5-day training session for technicians in Cameroon to ensure the regular operation is maintained. In July 2010, the 13th Chinese technical team working on the Yaounde C…	160	Other Social infrastructure and services		Completion	3	Free-standing technical assistance	Cameroon	http://cm.mofcom.gov.cn/article/zxhz/hzjj/201007/20100707021467.shtml, Government Source (Donor/Recipient); http://cm.mofcom.gov.cn/article/zxhz/hzjj/201103/20110307455321.shtml, Government Source (Donor/Recipient); http://cm.mofcom.gov.cn/article/jmxw/200810/20081005824737.shtml, Government Source (Donor/Recipient)	3							Checked	1	ODA-like	2	Development	1	Active	1							1.13667	0		2010-07-01		2010-07-13		1	Cameroon	471	229	Cameroon	CMR	CM	120
31886	China	Riverway Transform Project for Multipurpose Stadium	2008	FALSE	In April 2008, China and Cameroon signed an agreement to transform the waterway surrounding the Yaounde's Multipurpose Stadium due to the danger of flood during rainy seasons. The construction contract was signed in May 2009 with Shanxi Construction Enginnering (Group) Corporation. The project has been reportedly completed in 2010.	430	Other Multisector		Completion	3	Grant	Cameroon	http://cm.mofcom.gov.cn/article/zxhz/sbmy/200804/20080405462038.shtml, Government Source (Donor/Recipient); http://www.sinosure.com.cn/sinosure/xwzx/rdzt/tzyhz/dwtzxs/139343.html, Other Official Source (non-Donor, non-Recipient); http://cm.mofcom.gov.cn/article/jmxw/200905/20090506226327.shtml, Government Source (Donor/Recipient)	3		Shanxi Construction Engineering (Group) Corporation, Public Private Partnership	Shanxi Construction Engineering (Group) Corporation, Public Private Partnership	1			Checked	1	ODA-like	2	Development	1	Active	1							1.13667	0						1	Cameroon	471	229	Cameroon	CMR	CM	120
322	China	Fertilizer plant	2008	FALSE	In November 2008 China's Overseas Construction Group Co Ltd (CGC) signed a draft agreement to build a 135 billion CFA plant, funded through a preferential loan with the Exim Bank. The plant will use local natural gas to produce 80,000 tonnes of ammonia and 130,000 tonnes of urea per year for use in fertilizer. As of 2011 the project still appears to be planned, but no updates on progress are avai…	320	Industry, Mining, Construction		Pipeline: Pledge	12	Loan (excluding debt rescheduling)	Cameroon	http://www.businessincameroon.com/categories/53-News/287-the-fertilizer-one-sector-to-fertilize-, Media Report, including Wikileaks; http://www.natesc.gov.cn/Html/2008_12_18/52871_53702_2008_12_18_69426.html, Government Source (Donor/Recipient); http://global.factiva.com/aa/?ref=LBA0000020081127e4br001jz&pp=1&fcpil=en&napc=S&sa_from=, Media Report, including Wikileaks	3	Export-Import Bank of China, Government Agency	China Overseas Construction Group Co., Ltd., State-Owned Company	Export-Import Bank of China, Government Agency; China Overseas Construction Group Co., Ltd., State-Owned Company	2			Checked	1	OOF-like	3	Commercial	2	Active	1	http://global.factiva.com/aa/?ref=LBA0000020081127e4br001jz&pp=1&fcpil=en&napc=S&sa_from=, Media Report, including Wikileaks	135000000000	XAF	0.988996	447.805	304824639	1.13667	3.46486e+08	3.0147e+08					1	Cameroon	471	229	Cameroon	CMR	CM	120
309	China	China provides interest-free loan for economic and technical cooperation	2007	FALSE	On January 31, 2007 Chinese President Hu Jintao and Paul Biya of Cameroon, signed a 30 million yuan interest-free loan for economic and technical cooperation. The sector and project that the money will fund is unclear, as well as the start and end dates and the implementing agencies.The Chinese and Cameroon officials also signed a number of deals including eight accords. Deals included a debt can…	998	Unallocated / Unspecified		Pipeline: Commitment	11	Loan (excluding debt rescheduling)	Cameroon	http://news.xinhuanet.com/world/2007-01/31/content_5680787.htm, Media Report, including Wikileaks; http://www.dibussi.com/2010/12/wikileaks-chinas-growing-presence-in-cameroon.html, Other Official Source (non-Donor, non-Recipient); http://global.factiva.com/aa/?ref=INHT000020070201e32100023&pp=1&fcpil=en&napc=S&sa_from=, Media Report, including Wikileaks	3							Checked	1	ODA-like	2	Development	1	Active	1	http://global.factiva.com/aa/?ref=INHT000020070201e32100023&pp=1&fcpil=en&napc=S&sa_from=, Media Report, including Wikileaks	30000000	CNY	0.837995	7.60753	4.70583e+06	1.13667	5.34899e+06	3.94346e+06					1	Cameroon	471	229	Cameroon	CMR	CM	120
11939	China	Concessional loan for telecommunications infrastructure	2007	FALSE	On January 31, 2007, President Hu Jintao extended a loan worth 350 million CNY for telecommunications projects (some sources say a single project). No further information is available about the project, including the implementing agencies, start and end time, location or contacts. At least 40 million CNY from this loan may have been spent on wireless (CDMA) phone technology for CAMTEL (developed …	220	Communications		Pipeline: Pledge	12	Loan (excluding debt rescheduling)	Cameroon	http://www.dibussi.com/2010/12/wikileaks-chinas-growing-presence-in-cameroon.html, Other Official Source (non-Donor, non-Recipient); http://global.factiva.com/aa/?ref=INHT000020070201e32100023&pp=1&fcpil=en&napc=S&sa_from=, Media Report, including Wikileaks	2		Huawei Technologies Co., Ltd., Private Sector	Huawei Technologies Co., Ltd., Private Sector	1	Camtel, State-Owned Company	1	Checked	1	Vague (Official Finance)	5	Mixed (Some Development)	6	Active	1	http://global.factiva.com/aa/?ref=INHT000020070201e32100023&pp=1&fcpil=en&napc=S&sa_from=, Media Report, including Wikileaks	350000000	CNY	0.837995	7.60753	5.49013e+07	1.13667	6.24049e+07	4.6007e+07					1	Cameroon	471	229	Cameroon	CMR	CM	120
311	China	Hu cancels Cameroon debt	2007	FALSE	In 2007, Hu Jintao and his team, including Minister of Commerce Bo Xilai, Foreign Minister Li Zhaoxing and other senior policy makers, signed eight accord with Cameroon, and cancelled Cameroon's debt to China-- whose value was not specified.	600	Action Relating to Debt		Completion	3	Debt forgiveness	Cameroon	http://politics.people.com.cn/GB/1026/5352525.html, Media Report, including Wikileaks; http://www.reuters.com/article/2007/01/31/africa-china-idUSL3173715420070131, Media Report, including Wikileaks; http://news.xinhuanet.com/english/china/2014-07/10/c_133474011.htm, Government Source (Donor/Recipient)	3							Checked	1	ODA-like	2	Development	1	Active	1							1.13667	0				2007-01-01		1	Cameroon	471	229	Cameroon	CMR	CM	120
317	China	Computers donated to CRTV	2007	TRUE	On December 11, 2007, the Chinese embassy in Cameroon gifted ten computers and five laser-printers to the Cameroon Radio Television Corporation (CRTV) at the CRTV production center in Mballa II by the Chinese ambassador, Wang Changqin. The gift was receieved by CTRV's director general, Amadou Vamoulke.	220	Communications	Media- computers and printers	Completion	3	Grant	Cameroon	http://global.factiva.com/aa/?ref=BBCAP00020071219e3cj001s1&pp=1&fcpil=en&napc=S&sa_from=, Media Report, including Wikileaks	1	Chinese Embassy to Cameroom, Government Agency	Cameroon Radio and Television Corporation (CRTV), State-Owned Company	Chinese Embassy to Cameroom, Government Agency	1	Cameroon Radio and Television Corporation (CRTV), State-Owned Company	1	Checked	1	ODA-like	2	Development	1	Active	1	http://global.factiva.com/aa/?ref=BBCAP00020071219e3cj001s1&pp=1&fcpil=en&napc=S&sa_from=, Media Report, including Wikileaks						1.13667	0				2007-12-11		1	Cameroon	471	229	Cameroon	CMR	CM	120
11897	China	Construction of two schools	2007	FALSE	Reports indicate that the Chinese donated two primary schools to Cameroon in Nanga and Guider in 2007, and construction on the schools ended by July 2009. The commitment date and situation under which the commitment was signed is unknown, as well as the implementing agency for the project.	110	Education		Completion	3	Grant	Cameroon	http://global.factiva.com/redir/default.aspx?P=sa&an=AFNWS00020090622e56m000bg&cat=a&ep=ASE, Media Report, including Wikileaks; http://www.ccs.org.za/wp-content/uploads/2009/11/CCS-Central-Africa-Briefing-Paper-August-2009.pdf, Other Academic (Working Paper, Dissertation); http://vlex.cn/vid/practicing-neo-colonialism-cameroonian-198069091, Media Report, including Wikileaks	3							Checked	1	ODA-like	2	Development	1	Active	1	http://global.factiva.com/redir/default.aspx?P=sa&an=AFNWS00020090622e56m000bg&cat=a&ep=ASE, Media Report, including Wikileaks						1.13667	0						1	Cameroon	471	229	Cameroon	CMR	CM	120
22839	China	Gyneco-Obstetric and Paediatric hospital equipment and studies donation	2007	FALSE	In February 2007, China donated equipment and pre-construction studies of more than one hundred million francs from the Chinese government to the Gyneco-Obstetric and Paediatric hospitals in Yaounde and Douala. In January 2007 Hu Jintao and a group that includes the Chinese minister of commerce, Bo Xilai, the foreign minister Li Zhaoxing and other senior policy makers, signed eight accords with C…	120	Health		Completion	3	Grant	Cameroon	http://news.cameroon-today.com/president-paul-biya-of-cameroon-visits-china/7263/, Media Report, including Wikileaks; http://dad.synisys.com/dadcameroon/, Government Source (Donor/Recipient)	2							Checked	1	ODA-like	2	Development	1	Active	1		100000000	XAF	0.837995	479.267	248990	1.13667	283020	208652	2007-01-30		2007-02-01		1	Cameroon	471	229	Cameroon	CMR	CM	120
22856	China	Yaounde hospital accommodation construction	2007	FALSE	In 2007, China donated the construction of personnel accommodation at Yaounde's Hospital of Gynecology, Obstetrics, and Pediatrics worth $3 million.	120	Health		Completion	3	Grant	Cameroon	http://www.ccs.org.za/wp-content/uploads/2009/11/CCS-Central-Africa-Briefing-Paper-August-2009.pdf, Other Academic (Working Paper, Dissertation)	1							Checked	1	ODA-like	2	Development	1	Active	1		3000000	USD	0.837995	1	3.57997e+06	1.13667	4.06926e+06	3000000					1	Cameroon	471	229	Cameroon	CMR	CM	120
315	China	Build a water treatment plant and water distribution pipeline in Douala	2007	FALSE	On August 30, 2011, China Exim Bank provided a concessional loan of 11 billion FCFA to help build a water treatment plant with a capacity of 50,000 ton/day and a 20 km long water distribution pipeline on River Mungo at Ayata, Douala, Cameroon. The agreement for the provision of the loan was signed by Chinese ambassador to Cameroon Huang Changqing and Cameroonian finance minister Polycarpe Abah Ab…	140	Water Supply and Sanitation		Completion	3	Loan (excluding debt rescheduling)	Cameroon	http://www.emploiservice.net/index.php?option=com_content&view=article&id=217&lang=en, Implementing/Intermediary Agency Source; http://www.crtv.cm/cont/nouvelles/nouvelles_sola_fr.php?idField=5467&table=nouvelles&sub=special, Media Report, including Wikileaks; http://news.xinmin.cn/rollnews/2009/07/27/2296742.html, Other; http://news.sohu.com/20070831/n251889290.shtml, Media Report, including Wik…	7	Export-Import Bank of China, Government Agency	Ministry of Energy and Water Resources, Government Agency; CGC Overseas Construction Co., Ltd. (CGCOC), State-Owned Company	Export-Import Bank of China, Government Agency; CGC Overseas Construction Co., Ltd. (CGCOC), State-Owned Company	2	Ministry of Energy and Water Resources, Government Agency	1	Checked	1	Vague (Official Finance)	5	Development	1	Active	1	http://global.factiva.com/aa/?ref=XNEWS00020070830e38u0043b&pp=1&fcpil=en&napc=S&sa_from=, Media Report, including Wikileaks	11000000000	XAF	0.837995	479.267	2.73889e+07	1.13667	3.11322e+07	2.29517e+07		2007-11-01	2010-05-31	2008-01-01	1	Cameroon	471	229	Cameroon	CMR	CM	120
31228	China	China Exim Bank loans 54.871 million USD to Cameroon for development of CDMA system	2007	FALSE	According to Cameroon's Aid Management System, the China Exim Bank promised 54,871,835 USD in loans to Cameroon for the development of a CDMA system. The project began on January 1, 2007, and has been completed. So far, 43,956,317 USD has been disbursed.	220	Communications		Completion	3	Loan (excluding debt rescheduling)	Cameroon	http://dad.synisys.com/dadcameroon/, Government Source (Donor/Recipient)	1	Export-Import Bank of China, Government Agency	Caisse Autonome d'Amortissement - National Debt Management Agency, Government Agency; Ministry of Post and Telecommunications, Government Agency	Export-Import Bank of China, Government Agency	1	Caisse Autonome d'Amortissement - National Debt Management Agency, Government Agency; Ministry of Post and Telecommunications, Government Agency	2	Checked	1	Vague (Official Finance)	5	Development	1	Active	1		54871835	USD	0.837995	1	6.54799e+07	1.13667	7.44293e+07	54871835	2007-01-01				1	Cameroon	471	229	Cameroon	CMR	CM	120
314	China	Gyneco-Obstetric and Paediatric hospital	2007	FALSE	In January 2007 Hu Jintao and a group that includes the Chinese minister of commerce, Bo Xilai, the foreign minister Li Zhaoxing and other senior policy makers, signed eight accords with Cameroon, including a loan agreement to build a gynecological, obstetric and pediatric hospital in Douala. In February 2007, China donated equipment and pre-construction studies of more than one hundred million f…	120	Health		Implementation	2	Loan (excluding debt rescheduling)	Cameroon	http://cm.mofcom.gov.cn/aarticle/jmxw/200909/20090906516225.html, Government Source (Donor/Recipient); http://www.ccs.org.za/wp-content/uploads/2009/11/CCS-Central-Africa-Briefing-Paper-August-2009.pdf, Other Academic (Working Paper, Dissertation); http://news.cameroon-today.com/president-paul-biya-of-cameroon-visits-china/7263/, Media Report, including Wikileaks; http://cm.mofcom.gov.cn/aarticle…	14	China Development Bank (CDB), Government Agency	Shanxi Construction Engineering (Group) Corporation, Public Private Partnership	Shanxi Construction Engineering (Group) Corporation, Public Private Partnership; China Development Bank (CDB), Government Agency	2			Checked	1	OOF-like	3	Development	1	Active	1		200000000	CNY	0.837995	7.60753	3.13722e+07	1.13667	3.56599e+07	2.62897e+07	2009-05-11	2007-08-16			1	Cameroon	471	229	Cameroon	CMR	CM	120
22818	China	National Sports School	2007	FALSE	The governments of Cameroon and China signed a partnership accord on Friday, November 30, in which the Chinese Government pledged to help construct a National Sports School in Cameron. The project would span for eight years during which the government of Cameroon is expected to refund the money to her Chinese counterpart. The EU 60 million project would provide for a 35,000 seat capacity National…	160	Other Social infrastructure and services		Pipeline: Commitment	11	Loan (excluding debt rescheduling)	Cameroon	http://allafrica.com/stories/200712032056.html, Media Report, including Wikileaks; http://www.sinomach.com.cn/templates/T_news_en/content.aspx?nodeid=290&page=ContentPage&contentid=2950, Media Report, including Wikileaks; http://www.atelier11china.com/english/work.aspx?id=277#, Implementing/Intermediary Agency Source; http://www.camfoot.com/actualites/work-begins-on-limbe-stadium-site,12975.html,…	4		China National Machinery and Equipment Import & Export Corporation, State-Owned Company	China National Machinery and Equipment Import & Export Corporation, State-Owned Company	1			Checked	1	OOF-like	3	Development	1	Active	1		60000000	EUR	0.837995	0.7305	9.80144e+07	1.13667	1.1141e+08	8.21355e+07					1	Cameroon	471	229	Cameroon	CMR	CM	120
22824	China	Renovation of Provincial Stadiums	2007	FALSE	The governments of Cameroon and China signed a partnership accord on November 30, 2007 that provides for rehabilitation of existing stadiums in each of Cameroon's provincial headquarters. The project was projected to cost 209 million Euros. It would span for eight years, during which Cameroon was expected to pay back its loan to China. A Chinese company, China National Machinery and Equipment Imp…	160	Other Social infrastructure and services		Implementation	2	Loan (excluding debt rescheduling)	Cameroon	http://www.businessincameroon.com/categories/53-news/241-china-cameroon-a-win-win-partnership, Media Report, including Wikileaks; http://allafrica.com/stories/200712032056.html, Media Report, including Wikileaks; http://business.highbeam.com/3548/article-1G1-172030925/chinese-construct-biya-stadium, Other Official Source (non-Donor, non-Recipient); http://www.thisissport.info/2010/09/limbe-bafous…	10	Export-Import Bank of China, Government Agency	China National Machinery and Equipment Import & Export Corporation, State-Owned Company	Export-Import Bank of China, Government Agency; China National Machinery and Equipment Import & Export Corporation, State-Owned Company	2			Checked	1	Vague (Official Finance)	5	Development	1	Active	1		209000000	EUR	0.837995	0.7305	3.41417e+08	1.13667	3.88079e+08	2.86105e+08	2007-01-01				1	Cameroon	471	229	Cameroon	CMR	CM	120
31288	China	Confucius Institute at the University of Yaoundï¿½ II	2007	TRUE	A Chinese Language Training Center was founded on the 9th November, 2007 in Cameroon. In December of 1995, China and Cameroon agreed to cooperation to found such an institution. The Chinese sponsors of the project are Zhejiang Normal University (ZNU) and the University of Yaounde II. The center was founded at the International Relationships Institute of Cameroon. In 2007, the Chinese Language Tra…	110	Education		Completion	3	Vague TBD	Cameroon	http://english.hanban.org/confuciousinstitutes/node_10903.htm, Government Source (Donor/Recipient); http://www.chineselanguageteacher.com/confucius-institute-at-university-of-yaounde-ii-uyii-of-cameroon-1261.html, Other Official Source (non-Donor, non-Recipient); http://www.chinese.cn/conference11/article/2011-12/12/content_394490.htm, Other Official Source (non-Donor, non-Recipient); http://engl…	4		Confucius Institute, Government Agency	Confucius Institute, Government Agency	1			Checked	1	OOF-like	3	Representational	3	Active	1							1.13667	0				2007-11-09		1	Cameroon	471	229	Cameroon	CMR	CM	120
31837	China	13th Chinese medical team	2006	FALSE	China has been sending medical teams to Cameroon every two years since 1975. Shanxi Province has been responsible for sending the teams. The 13th medical team of 44 members arrived in Cameroon in July 2006. The team worked at Yaounde Gynaeco-Obstetric and Pediatric Hospital, Mbalmayo District Hospital, and Guider District Hospital for two years.	120	Health	Medical Assistance	Completion	3	Free-standing technical assistance	Cameroon	http://www.sxws.cn/IndexNews/xinwenneirong.asp?NewsId=5656, Government Source (Donor/Recipient); http://www.moh.gov.cn/gjhzs/dyhbz/201308/f2f7fff75cf14e269ad6aedb3d0f4980.shtml, Government Source (Donor/Recipient); http://www.cetin.net.cn/cetin2/servlet/cetin/action/HtmlDocumentAction;jsessionid=C979946D1E7B55A7928362F283752843?baseid=1&docno=286423, Media Report, including Wikileaks; http://www.…	4							Checked	1	ODA-like	2	Development	1	Active	1							1.13667	0						1	Cameroon	471	229	Cameroon	CMR	CM	120
296	China	Mvomeka Primary School	2006	FALSE	On September 27, 2007, Chinese Ambassador to Cameron Huang Changqing handed over a school in Mvomeka to Cameroonian authorities, which was constructed by China under the cooperation agreement signed by China and Cameroon in September 2006. The ceremony was attended by Cameroonian Basic Education Minister Haman Adama. Organizations involved with the construction and financing of this project are u…	110	Education		Completion	3	Grant	Cameroon	http://vlex.cn/vid/donates-new-modern-school-cameroon-198673703, Media Report, including Wikileaks; http://vlex.cn/vid/practicing-neo-colonialism-cameroonian-198069091, Media Report, including Wikileaks	2							Checked	1	ODA-like	2	Development	1	Active	1							1.13667	0				2007-09-27		1	Cameroon	471	229	Cameroon	CMR	CM	120
[truncated: 2,304 more rows]
[truncated: 16 more columns]
