# Supplementary material
Source: publisher figshare collection journal article supplement (https://sage.figshare.com/ndownloader/files/14729102)
Supplement: Supplementary file 5 [file 14729102 › replication_archive/data/external_input/PSED_dyad.xlsx]

## Sheet: PSED_dyad_promises
location	GWNo	region	conflictID	dyadID	pseddyID	paname	paID	SideA	SideA_ID	SideB	SideB_ID	multireb	prevpeace	VioEndDate	PostStartDate	PostEndDate	pps_cabinet	pps_sencabinet	pps_nsencabinet	pps_parlquota	mps_milcmd	mps_armyint	eps_company	eps_commission	tps_devolution	tps_autonomy	other_proprep	other_parlelect	other_preselect	other_referendum	other_constitution	other_unresolved
Haiti	41	5	186	251	251001	Governor's Island Agreement	4119930703	Government of Haiti	41	Forces of Raol Cédras	1625	0	0	1991-10-01	1993-07-03	1998-07-03	0	0	0	0	0	0	0	0	0	0	0	0	0	0	0	1
Mexico	70	5	205	230	230001	San Andrés Accords	7019960216	Government of Mexico	70	EZLN	1628	0	0	1994-01-12	1996-02-16	2001-02-16	0	0	0	0	0	0	0	0	0	0	0	0	0	0	0	1
Guatemala	90	5	36	228	228001	Agreement for a Firm and Lasting Peace	9019961229	Government of Guatemala	90	URNG	1593	0	0	1995-12-31	1996-12-29	2001-12-29	0	0	0	0	0	0	0	0	1	0	0	0	0	0	1	1
El Salvador	92	5	120	225	225001	Chapultepec Peace Agreement	9219920116	Government of El Salvador	92	FMLN	1616	0	0	1991-12-31	1992-01-16	1997-01-16	0	0	0	0	0	1	0	0	0	0	0	1	0	0	1	1
Colombia	100	5	92	343	343001	Final Agreement National Government- Popular Liberation Army	10019910215	Government of Colombia	100	EPL	1607	0	0	1990-07-27	1991-02-15	1996-02-15	0	0	0	1	0	0	0	0	0	0	0	0	0	0	0	1
United Kingdom	200	1	119	216	216001	Good Friday Agreement	20019980410	Government of United Kingdom	200	PIRA	1124	0	0	1991-12-15	1998-04-10	2003-04-10	0	0	0	0	0	0	0	0	0	1	0	0	0	1	0	1
Macedonia	343	1	223	341	341001	Ohrid Agreement	34320010813	Government of Macedonia	343	UCK	1204	0	0	2001-08-13	2001-08-13	2006-08-13	0	0	0	0	0	0	0	0	1	0	0	1	0	0	0	0
Croatia	344	1	195	303	303001	Erdut Agreement	34419951112	Government of Croatia	344	Serbian Republic of Krajina	1183	0	0	1995-11-12	1995-11-12	2000-11-12	0	0	0	0	0	0	0	0	0	0	0	0	0	0	0	0
Serbia (Yugoslavia)	345	1	189	281	281001	Brioni Agreement	34519910708	Government of Serbia	345	Republic of Slovenia	1179	0	0	1991-07-08	1991-07-08	1992-05-22	0	0	0	0	0	0	0	0	0	0	0	0	0	0	0	0
Serbia (Yugoslavia)	345	1	218	295	295001	Kosovo Peace Plan	34519990603	Government of Serbia	345	UCK	1200	0	0	1999-06-03	1999-06-03	2004-06-03	0	0	0	0	0	0	0	0	0	1	0	0	0	0	0	1
Bosnia-Herzegovina	346	1	203	293	293001	Washington Agreement	34619940301	Government of Bosnia-Herzegovina	346	Croatian Republic of Bosnia-Herzegovina	1193	0	0	1994-03-01	1994-03-01	1999-03-01	1	1	1	0	1	1	0	0	1	0	0	0	0	0	1	1
Bosnia-Herzegovina	346	1	194	292	292001	General Framework Agreement for Peace in Bosnia and Herzegovina (Dayton Agreement)	34619951121	Government of Bosnia-Herzegovina	346	Serbian Republic of Bosnia-Herzegovina	1182	0	0	1995-11-21	1995-11-21	2000-11-21	1	0	1	0	0	0	0	0	0	1	0	1	0	0	1	0
Moldova	359	1	199	367	367001	Memorandum on the Basis for Normalization of Relations between the Republic of Moldova and Transdniestria	35919970508	Government of Moldova	359	PMR	1187	0	0	1992-07-21	1997-05-08	2002-05-08	0	0	0	0	0	0	0	0	0	1	0	0	0	0	0	1
Georgia	372	1	197	259	259001	Declaration on measures for a political settlement of the Georgian/Abkhaz conflict	37219940404	Government of Georgia	372	Republic of Abkhazia	1185	0	0	1993-12-01	1994-04-04	1999-04-04	0	0	0	0	0	0	0	0	0	1	0	0	0	0	0	0
Guinea Bissau	404	4	216	58	58001	Agreement Between the Government of Guinea Bissau and the Self-Proclaimed Military Junta	40419981101	Government of Guinea-Bissau	404	Military Junta for the Consolidation of Democracy, Peace and Justice	1402	0	0	1998-11-01	1998-11-01	1999-01-31	1	0	0	0	0	0	0	0	0	0	0	1	1	0	0	1
Mali	432	4	177	96	96001	Tamanrasset Accord	43219910106	Government of Mali	432	MPA	1373	0	0	1990-12-31	1991-01-06	1996-01-06	0	0	0	0	0	1	0	0	0	0	0	0	0	0	0	1
Senegal	433	4	180	129	129001	Accord general de paix entre le gouvernement de la republique du Senegal el le Mouvement des forces democratique de la Casamace (MFDC)	43320041230	Government of Senegal	433	MFDC	1381	0	0	2003-12-31	2004-12-30	2009-12-30	0	0	0	0	0	1	0	0	0	0	0	0	0	0	0	0
Niger	436	4	255	761	761001	Paris Accord	43619930610	Government of Niger	436	FLAA	1376	0	0	1992-12-31	1993-06-10	1994-05-16	0	0	0	0	0	0	0	0	0	0	0	0	0	0	0	1
Niger	436	4	178	111	111001	Ouagadougou Accord	43619941009	Government of Niger	436	ORA/CRA	1377	0	0	1994-10-09	1994-10-09	1999-10-09	0	0	0	0	0	0	0	0	1	0	0	0	0	0	0	1
Côte d'Ivoire	437	4	225	89	89001	Linas-Marcoussis Peace Accords	43720030123	Government of Côte D'Ivoire	437	MPCI	1410	1	0	2003-01-23	2003-01-23	2003-01-24	1	0	0	0	0	0	0	0	0	0	0	1	0	0	0	1
Côte d'Ivoire	437	4	225	91	91001	Linas-Marcoussis Peace Accords	43720030123	Government of Côte D'Ivoire	437	MPIGO	1411	1	0	2003-01-23	2003-01-23	2003-01-24	1	0	0	0	0	0	0	0	0	0	0	1	0	0	0	1
Côte d'Ivoire	437	4	225	245	245001	Linas-Marcoussis Peace Accords	43720030123	Government of Côte D'Ivoire	437	MJP	1409	1	0	2003-01-23	2003-01-23	2003-01-24	1	0	0	0	0	0	0	0	0	0	0	1	0	0	0	1
Côte d'Ivoire	437	4	225	89	89002	Accra II	43720030307	Government of Côte D'Ivoire	437	MPCI	1410	1	1	2003-03-07	2003-03-07	2004-06-07	1	0	1	0	0	0	0	0	0	0	0	1	0	0	0	1
Côte d'Ivoire	437	4	225	91	91002	Accra II	43720030307	Government of Côte D'Ivoire	437	MPIGO	1411	1	1	2003-03-07	2003-03-07	2004-06-07	1	0	0	0	0	0	0	0	0	0	0	1	0	0	0	1
Côte d'Ivoire	437	4	225	245	245002	Accra II	43720030307	Government of Côte D'Ivoire	437	MJP	1409	1	1	2003-03-07	2003-03-07	2004-06-07	1	0	0	0	0	0	0	0	0	0	0	1	0	0	0	1
Côte d'Ivoire	437	4	225	89	89003	Accra III	43720040730	Government of Côte D'Ivoire	437	MPCI	1410	1	1	2004-07-30	2004-07-30	2004-11-09	1	0	0	0	0	0	0	0	0	0	0	1	0	0	0	1
Côte d'Ivoire	437	4	225	91	91003	Accra III	43720040730	Government of Côte D'Ivoire	437	MPIGO	1411	1	1	2004-07-30	2004-07-30	2004-11-09	1	0	0	0	0	0	0	0	0	0	0	1	0	0	0	1
Côte d'Ivoire	437	4	225	245	245003	Accra III	43720040730	Government of Côte D'Ivoire	437	MJP	1409	1	1	2004-07-30	2004-07-30	2004-11-09	1	0	0	0	0	0	0	0	0	0	0	1	0	0	0	1
Côte d'Ivoire	437	4	225	439	439001	Pretoria Agreement on the Peace Process in Côte d'Ivoire	43720050406	Government of Côte D'Ivoire	437	FRCI	1412	0	1	2004-12-31	2005-04-06	2010-04-06	1	0	0	0	0	1	0	0	0	0	0	1	0	0	0	1
Liberia	450	4	146	94	94001	Banjul III Agreement	45019901024	Government of Liberia	450	INPFL	1359	0	0	1990-10-24	1990-10-24	1990-12-21	0	0	0	0	0	0	0	0	0	0	0	1	1	0	0	0
Liberia	450	4	146	93	93001	Banjul IV Agreement	45019901221	Government of Liberia	450	NPFL	1358	1	0	1990-12-21	1990-12-21	1992-10-31	1	0	0	0	0	0	0	0	0	0	0	1	1	0	0	1
Liberia	450	4	146	94	94002	Banjul IV Agreement	45019901221	Government of Liberia	450	INPFL	1359	1	1	1990-12-21	1990-12-21	1992-10-31	1	0	0	0	0	0	0	0	0	0	0	1	1	0	0	1
Liberia	450	4	146	95	95001	Accra Peace Agreement	45020030818	Government of Liberia	450	LURD	1360	1	0	2003-08-18	2003-08-18	2008-08-18	1	1	1	1	0	1	1	0	0	0	0	1	1	0	0	1
Liberia	450	4	146	352	352001	Accra Peace Agreement	45020030818	Government of Liberia	450	MODEL	1361	1	0	2003-08-18	2003-08-18	2008-08-18	1	1	1	1	0	1	1	0	0	0	0	1	1	0	0	1
Sierra Leone	451	4	187	130	130001	Abidjan Peace Agreement	45119961130	Government of Sierra Leone	451	RUF	1384	0	0	1996-11-30	1996-11-30	1997-05-13	0	0	0	0	0	0	0	0	0	0	0	0	0	0	0	1
Sierra Leone	451	4	187	130	130002	Lomé Peace Agreement	45119990707	Government of Sierra Leone	451	RUF	1384	0	1	1999-07-07	1999-07-07	2000-05-26	1	1	0	0	0	1	0	1	0	0	0	1	1	0	0	1
Sierra Leone	451	4	187	130	130003	Abuja Ceasefire Agreement	45120001110	Government of Sierra Leone	451	RUF	1384	0	1	2000-11-10	2000-11-10	2005-11-10	1	1	0	0	0	1	0	1	0	0	0	1	1	0	0	1
Chad	483	4	91	24	24001	El Geneina Agreement	48319921031	Government of Chad	483	FNT	1296	0	0	1992-10-31	1992-10-31	1993-12-31	0	0	0	0	0	1	0	0	0	0	0	0	0	0	0	0
Chad	483	4	91	24	24002	Abeche Agreement	48319941012	Government of Chad	483	FNT	1296	0	1	1994-10-12	1994-10-12	1999-10-12	0	0	0	0	0	1	0	0	0	0	0	0	0	0	0	1
Chad	483	4	91	22	22001	Tripoli-1 Agreement	48319931016	Government of Chad	483	CNR	1293	0	0	1993-10-16	1993-10-16	1993-10-22	1	0	0	0	0	1	0	0	0	0	0	0	0	0	0	0
Chad	483	4	91	21	21001	Bangui-2 Agreement	48319940811	Government of Chad	483	CSNPD	1294	0	0	1994-08-11	1994-08-11	1999-08-11	0	0	0	0	0	1	0	0	0	0	0	0	0	0	0	0
Chad	483	4	91	25	25001	Dougia Accord	48319951122	Government of Chad	483	MDD	1292	0	0	1993-02-28	1995-11-22	1997-12-15	0	0	0	0	1	1	0	0	0	0	0	0	0	0	0	0
Chad	483	4	91	25	25002	Reconciliation Agreement	48319990703	Government of Chad	483	MDD	1292	0	1	1997-12-31	1999-07-03	2004-07-03	0	0	0	0	0	1	0	0	0	0	0	0	0	0	0	0
Chad	483	4	91	26	26001	Donya Agreement	48319980507	Government of Chad	483	FARF	1297	0	0	1998-05-07	1998-05-07	2003-05-07	0	0	0	0	0	1	0	0	0	0	0	0	0	0	0	0
Chad	483	4	91	27	27001	Tripoli-2 Agreement	48320020107	Government of Chad	483	MDJT	1298	0	0	2002-01-07	2002-01-07	2002-05-27	0	0	0	0	0	1	0	0	0	0	0	0	0	0	0	1
Chad	483	4	91	27	27002	Yebibou Agreement	48320050818	Government of Chad	483	MDJT	1298	0	1	2002-12-31	2005-08-18	2010-08-18	0	0	0	0	0	1	0	0	0	0	0	0	0	0	0	1
Chad	483	4	91	455	455001	Tripoli Accord	48320061224	Government of Chad	483	FUCD	1299	0	0	2006-12-24	2006-12-24	2011-12-24	0	0	0	0	0	0	0	0	0	0	0	0	0	0	0	0
Congo	484	4	214	36	36001	Agreement on Ending Hostilities in the Republic of Congo	48419991229	Government of Congo (Brazzaville)	484	Ninjas	1399	1	0	1999-12-29	1999-12-29	2002-06-14	0	0	0	0	0	1	0	0	0	0	0	0	0	0	0	0
Congo	484	4	214	37	37001	Agreement on Ending Hostilities in the Republic of Congo	48419991229	Government of Congo (Brazzaville)	484	Cocoyes	1400	1	0	1999-12-29	1999-12-29	2002-06-14	0	0	0	0	0	1	0	0	0	0	0	0	0	0	0	0
Congo	484	4	214	38	38001	Agreement on Ending Hostilities in the Republic of Congo	48419991229	Government of Congo (Brazzaville)	484	Ntsiloulous	1401	1	0	1999-12-29	1999-12-29	2002-06-14	0	0	0	0	0	1	0	0	0	0	0	0	0	0	0	0
Democratic Republic of Congo (Zaire)	490	4	86	40	40001	Lusaka Accord	49019990710	Government of Democratic Republic of Congo (Kinshasa)	490	RCD	1270	1	0	1999-07-10	1999-07-10	1999-08-06	0	0	0	0	0	1	0	0	0	0	0	1	1	0	1	1
Democratic Republic of Congo (Zaire)	490	4	86	41	41001	Lusaka Accord	49019990710	Government of Democratic Republic of Congo (Kinshasa)	490	MLC	1269	1	0	1999-07-10	1999-07-10	1999-08-06	0	0	0	0	0	1	0	0	0	0	0	1	1	0	1	1
Democratic Republic of Congo (Zaire)	490	4	86	42	42001	Lusaka Accord	49019990710	Government of Democratic Republic of Congo (Kinshasa)	490	RCD-ML	1271	1	0	1999-07-10	1999-07-10	1999-08-06	0	0	0	0	0	1	0	0	0	0	0	1	1	0	1	1
Democratic Republic of Congo (Zaire)	490	4	86	40	40002	Inter-Congolese Political Negotiations (The Final Act)	49020030402	Government of Democratic Republic of Congo (Kinshasa)	490	RCD	1270	1	1	2001-12-31	2003-04-02	2008-04-02	1	1	1	1	0	1	1	0	1	0	0	1	1	0	1	1
Democratic Republic of Congo (Zaire)	490	4	86	41	41002	Inter-Congolese Political Negotiations (The Final Act)	49020030402	Government of Democratic Republic of Congo (Kinshasa)	490	MLC	1269	1	1	2001-12-31	2003-04-02	2008-04-02	1	1	1	1	0	1	1	0	1	0	0	1	1	0	1	1
Democratic Republic of Congo (Zaire)	490	4	86	42	42002	Inter-Congolese Political Negotiations (The Final Act)	49020030402	Government of Democratic Republic of Congo (Kinshasa)	490	RCD-ML	1271	1	1	2001-12-31	2003-04-02	2008-04-02	1	0	1	1	0	1	1	0	1	0	0	1	1	0	1	1
Uganda	500	4	118	431	431001	Yumbe Peace Agreement	50020021224	Government of Uganda	500	UNRF II	1339	0	0	1997-12-31	2002-12-24	2007-12-24	0	0	0	0	0	1	0	0	0	0	0	0	0	0	0	0
Burundi	516	4	90	11	11001	Arusha Peace and Reconciliation Agreement for Burundi	51620000828	Government of Burundi	516	Palipehutu	1276	1	0	1998-05-08	2000-08-28	2005-08-28	1	0	0	0	0	1	0	0	1	0	1	1	1	1	1	1
Burundi	516	4	90	12	12001	Arusha Peace and Reconciliation Agreement for Burundi	51620000828	Government of Burundi	516	CNDD	1277	1	0	1998-05-08	2000-08-28	2005-08-28	1	0	0	0	0	1	0	0	1	0	1	1	1	1	1	1
Burundi	516	4	90	13	13001	Arusha Peace and Reconciliation Agreement for Burundi	51620000828	Government of Burundi	516	Frolina	1279	1	0	1998-05-08	2000-08-28	2005-08-28	1	0	0	0	0	1	0	0	1	0	1	1	1	1	1	1
Burundi	516	4	90	14	14001	Global Ceasefire agreement between Transitional Government and the Forces pour la defence de la democratie (CNDD-FDD)	51620031116	Government of Burundi	516	CNDD-FDD	1280	0	0	2003-11-16	2003-11-16	2008-11-16	1	0	1	1	1	1	1	0	0	0	0	0	0	0	0	1
Burundi	516	4	90	15	15001	Comprehensive Ceasefire Agreement between the Government of Burundi and the Palipehutu-FNL	51620060907	Government of Burundi	516	Palipehutu-FNL	1278	0	0	2006-09-07	2006-09-07	2008-03-01	0	0	0	0	0	1	0	0	0	0	0	0	0	0	0	1
Rwanda	517	4	179	127	127001	Arusha Accords	51719930804	Government of Rwanda	517	RPF	1379	0	0	1993-08-04	1993-08-04	1993-08-31	1	1	1	1	1	1	0	0	0	0	0	1	1	1	1	1
Somalia	520	4	141	208	208001	Addis Ababa Agreement	52019930327	Government of Somalia	520	SPM	1351	1	0	1993-03-27	1993-03-27	1993-06-05	0	0	0	0	0	0	0	0	1	0	0	0	0	0	1	0
Somalia	520	4	141	209	209001	Addis Ababa Agreement	52019930327	Government of Somalia	520	SSDF	1349	1	0	1993-03-27	1993-03-27	1993-06-05	0	0	0	0	0	0	0	0	1	0	0	0	0	0	1	0
Somalia	520	4	141	211	211001	Addis Ababa Agreement	52019930327	Government of Somalia	520	USC/SNA	1353	1	0	1993-03-27	1993-03-27	1993-06-05	0	0	0	0	0	0	0	0	1	0	0	0	0	0	1	0
Somalia	520	4	141	211	211002	Nairobi Declaration on National Reconciliation	52019940324	Government of Somalia	520	USC/SNA	1353	0	1	1994-03-24	1994-03-24	1994-06-23	0	0	0	0	0	0	0	0	1	0	0	0	0	0	0	1
Djibouti	522	4	184	43	43001	Agreement on Peace and National Reconciliation	52219941226	Government of Djibouti	522	FRUD	1382	0	0	1994-12-26	1994-12-26	1999-12-26	0	0	0	0	0	1	0	0	1	0	0	0	0	0	0	1
Djibouti	522	4	184	44	44001	General Agreement on Reform and Civil Concord	52220000207	Government of Djibouti	522	FRUD-AD	1383	0	0	1999-12-31	2000-02-07	2005-02-07	0	0	0	0	0	1	0	0	1	0	0	0	0	0	0	1
Angola	540	4	131	7	7001	Gbadolite Declaration on Angola	54019890622	Government of Angola	540	UNITA	1421	0	0	1989-06-22	1989-06-22	1989-08-24	0	0	0	0	0	0	0	0	0	0	0	0	0	0	0	0
Angola	540	4	131	7	7002	Bicesse Agreement	54019910531	Government of Angola	540	UNITA	1421	0	1	1991-05-31	1991-05-31	1992-10-17	0	0	0	0	1	1	0	0	0	0	0	1	1	0	0	1
Angola	540	4	131	7	7003	Lusaka Protocol	54019941120	Government of Angola	540	UNITA	1421	0	1	1994-11-20	1994-11-20	1994-11-23	1	0	1	0	1	1	0	0	1	0	0	0	0	0	0	1
Angola	540	4	131	7	7004	Memorandum of Understanding	54020020404	Government of Angola	540	UNITA	1421	0	1	2002-04-04	2002-04-04	2007-04-04	1	0	1	0	1	1	0	0	1	0	0	0	0	0	0	1
Angola	540	4	192	191	191001	Memorandum of Understanding on Peace and National Reconciliation in Cabinda province	54020060801	Government of Angola	540	FLEC-R	1392	0	0	2002-12-31	2006-08-01	2011-08-01	1	0	1	0	0	0	1	0	1	0	0	0	0	0	0	1
Mozambique	541	4	136	99	99001	Acordo Geral de Paz	54119921004	Government of Mozambique	541	Renamo	1347	0	1	1992-10-04	1992-10-04	1997-10-04	0	0	0	0	1	1	0	0	0	0	0	1	1	0	0	0
South Africa	560	4	150	558	558001	Interim Constitution	56019931118	Government of South Africa	560	ANC	1364	0	0	1988-12-31	1993-11-18	1998-11-18	1	0	0	0	0	1	0	0	1	0	1	1	0	1	1	1
Comoros	581	4	213	35	35001	Famboni Declaration	58120000826	Government of Comoros	581	MPA/Republic of Anjouan	1397	0	0	1997-12-13	2000-08-26	2005-08-26	0	0	0	0	0	0	0	0	1	0	0	0	0	1	1	1
Sudan	625	4	113	641	641001	Comprehensive Peace Agreement	62520050109	Government of Sudan	625	SPLM/A	1312	0	1	2004-12-31	2005-01-09	2010-01-09	1	1	1	1	1	1	0	1	1	1	0	1	1	1	1	1
Sudan	625	4	113	645	645001	Cairo Agreement	62520050618	Government of Sudan	625	NDA	1314	0	0	2001-12-31	2005-06-18	2010-06-18	0	0	0	0	0	0	0	0	1	0	0	1	1	0	1	1
Sudan	625	4	113	631	631001	Darfur Peace Agreement	62520060505	Government of Sudan	625	SLM/A-Minni Minawi	1318	0	0	2006-05-05	2006-05-05	2011-05-05	1	1	0	1	0	1	0	0	1	0	0	0	0	1	0	0
Afghanistan	700	3	137	412	412001	Islamabad Accord	70019930307	Government of Afghanistan	700	Hizb-i Islami-yi Afghanistan	1141	1	0	1993-03-07	1993-03-07	1993-04-15	1	1	1	0	0	0	0	0	0	0	0	1	1	0	1	1
Afghanistan	700	3	137	413	413001	Islamabad Accord	70019930307	Government of Afghanistan	700	Hizb-i Wahdat	1142	1	0	1993-03-07	1993-03-07	1993-04-15	1	0	1	0	0	0	0	0	0	0	0	1	1	0	1	1
Afghanistan	700	3	137	731	731001	Islamabad Accord	70019930307	Government of Afghanistan	700	Harakat-i Inqilab-i Islami-yi Afghanistan	1135	1	0	1993-03-07	1993-03-07	1993-04-15	1	0	1	0	0	0	0	0	0	0	0	1	1	0	1	1
Afghanistan	700	3	137	732	732001	Islamabad Accord	70019930307	Government of Afghanistan	700	Mahaz-i Milli-yi Islami-yi Afghanistan	1138	1	0	1993-03-07	1993-03-07	1993-04-15	1	0	1	0	0	0	0	0	0	0	0	1	1	0	1	1
Afghanistan	700	3	137	733	733001	Islamabad Accord	70019930307	Government of Afghanistan	700	Jabha-yi Nijat-i Milli-yi Afghanistan	1137	1	0	1993-03-07	1993-03-07	1993-04-15	1	0	1	0	0	0	0	0	0	0	0	1	1	0	1	1
Afghanistan	700	3	137	735	735001	Islamabad Accord	70019930307	Government of Afghanistan	700	Ittihad-i Islami Bara-yi Azadi-yi Afghanistan	1139	1	0	1993-03-07	1993-03-07	1993-04-15	1	0	1	0	0	0	0	0	0	0	0	1	1	0	1	1
Afghanistan	700	3	137	737	737001	Islamabad Accord	70019930307	Government of Afghanistan	700	Harakat-i Islami-yi Afghanistan	1140	1	0	1984-12-31	1993-03-07	1993-04-15	1	0	1	0	0	0	0	0	0	0	0	1	1	0	1	1
Afghanistan	700	3	137	412	412002	Jalalabad Agreement	70019930520	Government of Afghanistan	700	Hizb-i Islami-yi Afghanistan	1141	1	1	1993-05-20	1993-05-20	1993-12-31	1	1	1	0	0	0	0	0	0	0	0	1	1	0	0	1
Afghanistan	700	3	137	413	413002	Jalalabad Agreement	70019930520	Government of Afghanistan	700	Hizb-i Wahdat	1142	1	1	1993-05-20	1993-05-20	1993-12-31	1	0	1	0	0	0	0	0	0	0	0	1	1	0	0	1
Afghanistan	700	3	137	731	731002	Jalalabad Agreement	70019930520	Government of Afghanistan	700	Harakat-i Inqilab-i Islami-yi Afghanistan	1135	1	1	1993-05-20	1993-05-20	1993-12-31	1	0	1	0	0	0	0	0	0	0	0	1	1	0	0	1
Afghanistan	700	3	137	732	732002	Jalalabad Agreement	70019930520	Government of Afghanistan	700	Mahaz-i Milli-yi Islami-yi Afghanistan	1138	1	1	1993-05-20	1993-05-20	1993-12-31	1	0	1	0	0	0	0	0	0	0	0	1	1	0	0	1
Afghanistan	700	3	137	733	733002	Jalalabad Agreement	70019930520	Government of Afghanistan	700	Jabha-yi Nijat-i Milli-yi Afghanistan	1137	1	1	1993-05-20	1993-05-20	1993-12-31	1	0	1	0	0	0	0	0	0	0	0	1	1	0	0	1
Afghanistan	700	3	137	735	735002	Jalalabad Agreement	70019930520	Government of Afghanistan	700	Ittihad-i Islami Bara-yi Azadi-yi Afghanistan	1139	1	1	1993-05-20	1993-05-20	1993-12-31	1	0	1	0	0	0	0	0	0	0	0	1	1	0	0	1
Afghanistan	700	3	137	737	737002	Jalalabad Agreement	70019930520	Government of Afghanistan	700	Harakat-i Islami-yi Afghanistan	1140	1	1	1993-05-20	1993-05-20	1993-12-31	1	0	1	0	0	0	0	0	0	0	0	1	1	0	0	1
Afghanistan	700	3	137	412	412003	Mahipar Agreement	70019960524	Government of Afghanistan	700	Hizb-i Islami-yi Afghanistan	1411	0	1	1995-12-31	1996-05-24	1996-09-28	1	1	1	0	0	1	0	0	0	0	0	1	1	0	0	0
Tajikistan	702	3	200	353	353001	Moscow Declaration	70219970627	Government of Tajikistan	702	UTO	1188	0	0	1996-12-23	1997-06-27	1998-03-31	1	0	0	0	0	0	0	0	0	0	0	1	0	1	0	1
India	750	3	227	309	309001	Bodoland Autonomous Council Act	75019930220	Government of India	750	ABSU	1205	0	0	1990-12-31	1993-02-20	1998-02-20	0	0	0	0	0	0	0	0	1	0	0	0	0	0	0	0
India	750	3	139	262	262001	Memorandum of Settlement	75019930823	Government of India	750	ATTF	1149	0	0	1993-08-23	1993-08-23	1997-01-01	0	0	0	0	0	0	0	0	0	0	0	0	0	0	0	0
Bangladesh	771	3	126	223	223001	Chittagong Hill Tracts Peace Accord	77119971202	Government of Bangladesh	771	JSS/SB	1127	0	0	1992-11-05	1997-12-02	2002-12-02	0	0	0	0	0	0	0	0	1	1	0	0	0	0	0	0
Nepal	790	3	72	349	349001	Comprehensive Peace Agreement	79020061121	Government of Nepal	790	CPN-M	1100	0	0	2006-11-21	2006-11-21	2011-11-21	0	0	0	1	0	0	0	0	0	0	1	1	0	0	1	1
Cambodia	811	3	103	364	364001	Final Act of the Paris Conference on Cambodia	81119911023	Government of Cambodia	811	KR	1112	1	0	1991-10-23	1991-10-23	1992-06-30	0	0	0	0	0	0	0	0	0	0	1	1	0	0	1	0
Cambodia	811	3	103	378	378001	Final Act of the Paris Conference on Cambodia	81119911023	Government of Cambodia	811	KPNLF	1114	1	0	1991-10-23	1991-10-23	1996-10-23	0	0	0	0	0	0	0	0	0	0	1	1	0	0	1	0
Cambodia	811	3	103	379	379001	Final Act of the Paris Conference on Cambodia	81119911023	Government of Cambodia	811	FUNCINPEC	1115	1	0	1991-10-23	1991-10-23	1996-10-23	0	0	0	0	0	0	0	0	0	0	1	1	0	0	1	0
Philippines	840	3	10	220	220001	General Agreement for Peace between the Government of the Republic of the Philippines and the Rebolusyonaryong Alyansang Makabansa - Soldiers of the Filipino People - Young Officers' Union	84019951013	Government of Philippines	840	Forces of Honasan, Abenina & Zumel	1011	0	0	1990-12-31	1995-10-13	2000-10-13	0	0	0	0	0	1	0	0	0	0	0	0	0	0	0	0
Philippines	840	3	112	247	247001	Mindanao Final Agreement	84019960902	Government of Philippines	840	MNLF	1117	0	1	1993-12-31	1996-09-02	2001-09-02	0	0	0	0	1	1	0	0	0	1	0	0	0	1	0	0
Philippines	840	3	112	242	242001	Agreement on Peace between the government of the Republic of the Philippines and the Moro Islamic Liberation Front	84020010622	Government of Philippines	840	MILF	1118	0	0	2001-06-22	2001-06-22	2002-01-31	0	0	0	0	0	0	0	0	0	0	0	0	0	0	0	1
Indonesia	850	3	171	347	347001	Cessation of Hostilities Framework Agreement	85020021209	Government of Indonesia	850	GAM	1170	0	0	2002-12-09	2002-12-09	2003-05-19	0	0	0	0	0	0	0	0	0	1	0	0	0	0	0	0
Indonesia	850	3	171	347	347002	Memorandum of Understanding between the Government of the Republic of Indonesia and the Free Aceh Movement	85020050815	Government of Indonesia	850	GAM	1170	0	1	2005-08-15	2005-08-15	2010-08-15	0	0	0	0	0	0	0	0	0	1	0	0	0	0	0	0
Papua-New Guinea	910	3	174	337	337001	The Honiara Declaration	91019910123	Government of Papua New-Guinea	910	BRA	1171	0	0	1990-12-31	1991-01-23	1991-02-01	0	0	0	0	0	0	0	0	0	0	0	0	0	0	0	0
Papua-New Guinea	910	3	174	337	337002	Honiara Commitments to Peace	91019940903	Government of Papua New-Guinea	910	BRA	1171	0	1	1994-09-03	1994-09-03	1994-11-21	0	0	0	0	0	0	0	0	0	0	0	0	0	0	0	0
Papua-New Guinea	910	3	174	337	337003	Bougainville Peace Agreement	91020010830	Government of Papua New-Guinea	910	BRA	1171	0	1	1996-12-31	2001-08-30	2006-08-30	0	0	0	0	0	0	0	1	0	1	0	0	0	1	0	0

## Sheet: PSED_dyad_practices
location	GWNo	region	conflictID	dyadID	pseddyID	paname	paID	SideA	SideA_ID	SideB	SideB_ID	multireb	prevpeace	VioEndDate	PostStartDate	PostEndDate	edateprec	edate	etype	eventDESC	actorID	EIU	FOLLOWUP
Haiti	41	5	186	251	251001	The Governor's Island Agreement	4119930703	Government of Haiti	41	Forces of Raol Cédras	1625	0	0	1991-10-01	1993-07-03	1998-07-03	1	1993-07-03	1	PA signature	Government of Haiti (41), Forces of Raol Cédras (1625)	-99	PSED_promises
Haiti	41	5	186	251	251001	The Governor's Island Agreement	4119930703	Government of Haiti	41	Forces of Raol Cédras	1625	0	0	1991-10-01	1993-07-03	1998-07-03	1	1995-06-25	504	parliamentary elections (1st round): "The Organisation Politique Lavalas, which supports the president, Jean-Bertrand Aristide, consolidated its first-round success in the parliamentay elections held on June 25..."	-99	EIU 95 4th Quarter 1995, pg 30	-99
Haiti	41	5	186	251	251001	The Governor's Island Agreement	4119930703	Government of Haiti	41	Forces of Raol Cédras	1625	0	0	1991-10-01	1993-07-03	1998-07-03	1	1995-09-17	504	parliamentary elections (2nd round): "(The Organisation Politique Lavalas, which supports the president, Jean-Bertrand Aristide, consolidated its first-round success in the parliamentay elections held on June 25) with a clear victory in the second round on September 17."	-99	EIU 95 4th Quarter 1995, pg 30	-99
Haiti	41	5	186	251	251001	The Governor's Island Agreement	4119930703	Government of Haiti	41	Forces of Raol Cédras	1625	0	0	1991-10-01	1993-07-03	1998-07-03	1	1995-12-17	505	presidential elections: "The candidate of the governing Organisation Politique Lavalas, René Préval, was elected president on December 17. "	-99	EIU 96 1st Quarter 1996, pg 38	-99
Haiti	41	5	186	251	251001	The Governor's Island Agreement	4119930703	Government of Haiti	41	Forces of Raol Cédras	1625	0	0	1991-10-01	1993-07-03	1998-07-03	1	1998-07-03	2	end of 5-year period	-99	-99	UCDP
Mexico	70	5	205	230	230001	San Andrés Accords	7019960216	Government of Mexico	70	EZLN	1628	0	0	1994-01-12	1996-02-16	2001-02-16	1	1996-02-16	1	PA signature	Government of Mexico (70), EZLN (1628)	-99	PSED_promises
Mexico	70	5	205	230	230001	San Andrés Accords	7019960216	Government of Mexico	70	EZLN	1628	0	0	1994-01-12	1996-02-16	2001-02-16	1	1997-07-06	504	parliamentary elections: "In the congressional elections the PRI won 38.5% of vote, the PAN, 26.9% and the centre-left Partido de la Revolución Democrática (PRD), 25.8%. Five minor parties split the rest of the vote, (...). The PRI retains its absolute majority in the Senate, although it no longer has the two-thirds majority required for constitutional amendments. It remains the largest party in …	-99	3rd quarter 1997, pg 9	-99
Mexico	70	5	205	230	230001	San Andrés Accords	7019960216	Government of Mexico	70	EZLN	1628	0	0	1994-01-12	1996-02-16	2001-02-16	1	2000-07-02	504	parliamentary elections: "Alianza por el Cambio will constitute the biggest bloc, with 223 seats, of which 141 were won by simple majority. Of that total, the PAN will have 208 deputies and the PVEM group 15. The PRI won 209 seats, 131 of which were elected by simple majority. The Alianza por México, comprising the PRD and four small parties, will hold 68 seats, including 28 elected by simple maj…	-99	July 2000, pg 12, 13	-99
Mexico	70	5	205	230	230001	San Andrés Accords	7019960216	Government of Mexico	70	EZLN	1628	0	0	1994-01-12	1996-02-16	2001-02-16	1	2000-07-02	505	presidential elections: Vicente Fox Quesada (PAN)	-99	July 2000, pg 12, 13	-99
Mexico	70	5	205	230	230001	San Andrés Accords	7019960216	Government of Mexico	70	EZLN	1628	0	0	1994-01-12	1996-02-16	2001-02-16	1	2001-02-16	2	end of 5-year period	-99	-99	UCDP
Guatemala	90	5	36	228	228001	Agreement for a Firm and Lasting Peace	9019961229	Government of Guatemala	90	URNG	1593	0	0	1995-12-31	1996-12-29	2001-12-29	1	1996-12-29	1	PA signature	Government of Guatemala (90), URNG (1593)	-99	PSED_promises
Guatemala	90	5	36	228	228001	Agreement for a Firm and Lasting Peace	9019961229	Government of Guatemala	90	URNG	1593	0	0	1995-12-31	1996-12-29	2001-12-29	1	1999-05-16	506	referendum: voters were asked to accept or reject the package of 47 constitutional reforms that would have recognised the multilingual, multicultural, and multi- ethnic nature of the Guatemalan state, recognised indigenous rights, transformed the judiciary and curbed the power of the armed forces, turnout: 18,5%, out of the 4.1 million registered voters 9.4% voted no and 7.5% voted yes to the fou…	-99	1999, 3rd quarter	-99
Guatemala	90	5	36	228	228001	Agreement for a Firm and Lasting Peace	9019961229	Government of Guatemala	90	URNG	1593	0	0	1995-12-31	1996-12-29	2001-12-29	1	1999-11-07	504	parliamentary elections (1st round): total amount of seats: 113, Frente Republicano Guatemalteco (FRG): 63 seats, Partido de Avanzada Nacional (PAN): 37 seats, Alianza Nueva Nacion (ANN): 9, Partido Democracia Cristiana Guatemalteca (PDCG): 2, Partido Liberal Progresista (PLP): 1, Union Democratica-La Organizacion Verde (UD-LOV): 1	-99	2000, 1st quarter	-99
Guatemala	90	5	36	228	228001	Agreement for a Firm and Lasting Peace	9019961229	Government of Guatemala	90	URNG	1593	0	0	1995-12-31	1996-12-29	2001-12-29	1	1999-11-07	505	presidential elections (1st round)	-99	2000, 1st quarter	-99
Guatemala	90	5	36	228	228001	Agreement for a Firm and Lasting Peace	9019961229	Government of Guatemala	90	URNG	1593	0	0	1995-12-31	1996-12-29	2001-12-29	1	1999-12-26	504	parliamentary elections (2nd round): total amount of seats: 113, Frente Republicano Guatemalteco (FRG): 63 seats, Partido de Avanzada Nacional (PAN): 37 seats, Alianza Nueva Nacion (ANN): 9, Partido Democracia Cristiana Guatemalteca (PDCG): 2, Partido Liberal Progresista (PLP): 1, Union Democratica-La Organizacion Verde (UD-LOV): 1	-99	2000, 1st quarter	-99
Guatemala	90	5	36	228	228001	Agreement for a Firm and Lasting Peace	9019961229	Government of Guatemala	90	URNG	1593	0	0	1995-12-31	1996-12-29	2001-12-29	1	1999-12-26	505	presidential elections: Alfonso Portillo (FRG) swept to victory over Oscar Berger of the ruling Partido de Avanzada Nacional (PAN) in the second-round presidential election with 68.3% of the vote, large protest vote against the ruling PAN	-99	2000, 1st quarter	-99
Guatemala	90	5	36	228	228001	Agreement for a Firm and Lasting Peace	9019961229	Government of Guatemala	90	URNG	1593	0	0	1995-12-31	1996-12-29	2001-12-29	1	2001-12-29	2	end of 5-year period	-99	-99	UCDP
El Salvador	92	5	120	225	225001	Chapultepec Peace Agreement	9219920116	Government of El Salvador	92	FMLN	1616	0	0	1991-12-31	1992-01-16	1997-01-16	1	1992-01-16	1	PA signature	Government of El Salvador (92), FMLN (1616)	-99	PSED_promises
El Salvador	92	5	120	225	225001	Chapultepec Peace Agreement	9219920116	Government of El Salvador	92	FMLN	1616	0	0	1991-12-31	1992-01-16	1997-01-16	1	1992-02-05	267	military integration: former fmln combatants sworn into national police after graduating from police academy	FMLN (1616)	-99	The Guardian (London), 06.02.1993
El Salvador	92	5	120	225	225001	Chapultepec Peace Agreement	9219920116	Government of El Salvador	92	FMLN	1616	0	0	1991-12-31	1992-01-16	1997-01-16	1	1992-08-31	267	military integration: 20% of a 630-persons-strong unit are former fmln combatants, as they start training at an academy for the new national civilian police	FMLN (1616)	4th quarter 1992	-99
El Salvador	92	5	120	225	225001	Chapultepec Peace Agreement	9219920116	Government of El Salvador	92	FMLN	1616	0	0	1991-12-31	1992-01-16	1997-01-16	1	1994-03-20	504	parliamentary elections: Arena winning with 39 out of 84 parliament seats, FMLN with 22 seats, former ruling Partido Democratico Cristiano with 18, leftist Convergencia Democratica with 1, Arena-coalition party Partido de Conciliacion Nacional with 3 seats, evangelical party Movimiento Unidad with 1 seat	-99	2nd quarter 1994	-99
El Salvador	92	5	120	225	225001	Chapultepec Peace Agreement	9219920116	Government of El Salvador	92	FMLN	1616	0	0	1991-12-31	1992-01-16	1997-01-16	1	1994-03-20	505	presidential elections (1st round): arena candidate calderon sol with just under 50%	-99	2nd quarter 1994	-99
El Salvador	92	5	120	225	225001	Chapultepec Peace Agreement	9219920116	Government of El Salvador	92	FMLN	1616	0	0	1991-12-31	1992-01-16	1997-01-16	1	1994-04-24	505	presidential elections (2nd round): won by ARENA candidate Calderon Sol (first round on March 20)	-99	3rd quarter 1994	-99
El Salvador	92	5	120	225	225001	Chapultepec Peace Agreement	9219920116	Government of El Salvador	92	FMLN	1616	0	0	1991-12-31	1992-01-16	1997-01-16	1	1997-01-16	2	end of 5-year period	-99	-99	UCDP
Colombia	100	5	92	343	343001	Final Agreement National Government-Popular Liberation Army	10019910215	Government of Colombia	100	EPL	1607	0	0	1990-07-27	1991-02-15	1996-02-15	1	1991-02-15	1	PA signature	Government of Colombia (100), EPL (1607)	-99	PSED_promises
Colombia	100	5	92	343	343001	Final Agreement National Government-Popular Liberation Army	10019910215	Government of Colombia	100	EPL	1607	0	0	1990-07-27	1991-02-15	1996-02-15	4	1991-03-02	121	political power-sharing (rebel group quota for parliament): Two EPL commanders get seat in parliament	EPL (1607)	-99	The Independent 02.03.1991
Colombia	100	5	92	343	343001	Final Agreement National Government-Popular Liberation Army	10019910215	Government of Colombia	100	EPL	1607	0	0	1990-07-27	1991-02-15	1996-02-15	1	1991-07-05	507	constitution: new constitution approved	-99	3rd 1991	-99
Colombia	100	5	92	343	343001	Final Agreement National Government-Popular Liberation Army	10019910215	Government of Colombia	100	EPL	1607	0	0	1990-07-27	1991-02-15	1996-02-15	1	1991-10-27	122	political power-sharing (rebel group quota in parliament): no more quota/seats after parliamentary elections (PL 56 senators; 87 deputies; PSC 9 senators, 25 deputies; MSN 5 senators, 10 deputies; NFD 8 senators; AD 9 seantors, 13 deputies)	EPL (1607)	4th 1991	-99
Colombia	100	5	92	343	343001	Final Agreement National Government-Popular Liberation Army	10019910215	Government of Colombia	100	EPL	1607	0	0	1990-07-27	1991-02-15	1996-02-15	1	1991-10-27	504	parliamentary elections: PL 56 senators; 87 deputies; PSC 9 senators, 25 deputies; MSN 5 senators, 10 deputies; NFD 8 senators; AD 9 seantors, 13 deputies (senate and lower chamber)	-99	4th 1991	-99
Colombia	100	5	92	343	343001	Final Agreement National Government-Popular Liberation Army	10019910215	Government of Colombia	100	EPL	1607	0	0	1990-07-27	1991-02-15	1996-02-15	1	1994-03-13	504	parliamentary elections: Liberals 63 seats; Conservatives 26 seats; AD 2 seats (senate and lower chamber)	-99	2nd 1994	-99
Colombia	100	5	92	343	343001	Final Agreement National Government-Popular Liberation Army	10019910215	Government of Colombia	100	EPL	1607	0	0	1990-07-27	1991-02-15	1996-02-15	1	1994-05-29	505	presidential elections (1st round): Ernesto Samper Pizano (45%); Andrés Pastrana Arango (44%)	-99	3rd 1994	-99
Colombia	100	5	92	343	343001	Final Agreement National Government-Popular Liberation Army	10019910215	Government of Colombia	100	EPL	1607	0	0	1990-07-27	1991-02-15	1996-02-15	1	1994-06-19	505	presidential elections (2nd round): results: Mr Samper (50,45); Mr Pastrana (48,6%)	-99	3rd 1994	-99
Colombia	100	5	92	343	343001	Final Agreement National Government-Popular Liberation Army	10019910215	Government of Colombia	100	EPL	1607	0	0	1990-07-27	1991-02-15	1996-02-15	1	1996-02-15	2	end of 5-year period	-99	-99	UCDP
United Kingdom	200	1	119	216	216001	Good Friday Agreement	20019980410	Government of United Kingdom	200	PIRA	1124	0	0	1991-12-15	1998-04-10	2003-04-10	1	1998-04-10	1	PA signature	Government of United Kingdom (200), PIRA (1124)	-99	PSED_promises
United Kingdom	200	1	119	216	216001	Good Friday Agreement	20019980410	Government of United Kingdom	200	PIRA	1124	0	0	1991-12-15	1998-04-10	2003-04-10	1	1998-05-22	400	territorial power-sharing: devolution, with the endorsement of the peace agreement the government of Northern Ireland Law-making powers in a wide range of areas will devolve from Westminster to a 108-member assembly in Belfast elected by proportional representation		1998, 3rd quarter	-99
United Kingdom	200	1	119	216	216001	Good Friday Agreement	20019980410	Government of United Kingdom	200	PIRA	1124	0	0	1991-12-15	1998-04-10	2003-04-10	1	1998-05-22	506	referendum: endorsement of the peace agreement, turnout: 81%, "yes": 71%, "no": 29%	-99	1998, 3rd quarter	-99
United Kingdom	200	1	119	216	216001	Good Friday Agreement	20019980410	Government of United Kingdom	200	PIRA	1124	0	0	1991-12-15	1998-04-10	2003-04-10	1	2001-06-07	504	parliamentary elections: below 60%, labour: 40,8 %/413 seats, conservatives: 31,8%/166 seats, liberal democrats: 18,3%/52 seats	-99	2001, 3rd quarer	-99
United Kingdom	200	1	119	216	216001	Good Friday Agreement	20019980410	Government of United Kingdom	200	PIRA	1124	0	0	1991-12-15	1998-04-10	2003-04-10	1	2003-04-10	2	end of 5-year period	-99	-99	UCDP
Macedonia	343	1	223	341	341001	Ohrid Agreement	34320010813	Government of Macedonia	343	UCK	1204	0	0	2001-08-13	2001-08-13	2006-08-13	1	2001-08-13	1	PA signature	Government of Macedonia (343), UCK (1204) / DUI	-99	PSED_promises
Macedonia	343	1	223	341	341001	Ohrid Agreement	34320010813	Government of Macedonia	343	UCK	1204	0	0	2001-08-13	2001-08-13	2006-08-13	1	2001-11-16	507	constitution: New constitution is enacted	-99	February 2002, p14	-99
Macedonia	343	1	223	341	341001	Ohrid Agreement	34320010813	Government of Macedonia	343	UCK	1204	0	0	2001-08-13	2001-08-13	2006-08-13	1	2002-05-11	500	proportional representation: law introduces proportional representation	-99	May 2002, p13	-99
Macedonia	343	1	223	341	341001	Ohrid Agreement	34320010813	Government of Macedonia	343	UCK	1204	0	0	2001-08-13	2001-08-13	2006-08-13	1	2002-09-15	504	parliamentary elections: won by "Together for Macedonia" coalition: DUI: 11% (16 seats), SDSM: (59 seats), VMRO-DPMNE: 24% (34 seats)	-99	November 2002, p12	-99
Macedonia	343	1	223	341	341001	Ohrid Agreement	34320010813	Government of Macedonia	343	UCK	1204	0	0	2001-08-13	2001-08-13	2006-08-13	3	2002-11-01	100	Political powersharing: Democratic Union of Integration, political wing of the NLA(UCK), in government	UCK (1204) / DUI	November 2002, p. 12	-99
Macedonia	343	1	223	341	341001	Ohrid Agreement	34320010813	Government of Macedonia	343	UCK	1204	0	0	2001-08-13	2001-08-13	2006-08-13	3	2002-11-01	102	Musa Xhaferi (DUI); Deputy Prime Minister	UCK (1204) / DUI	November 2002, p. 4	-99
Macedonia	343	1	223	341	341001	Ohrid Agreement	34320010813	Government of Macedonia	343	UCK	1204	0	0	2001-08-13	2001-08-13	2006-08-13	3	2002-11-01	102	Ismail Dardista (DUI); Justice	UCK (1204) / DUI	November 2002, p. 4	-99
Macedonia	343	1	223	341	341001	Ohrid Agreement	34320010813	Government of Macedonia	343	UCK	1204	0	0	2001-08-13	2001-08-13	2006-08-13	3	2002-11-01	104	Azis Polozani (DUI); Education & science	UCK (1204) / DUI	November 2002, p. 4	-99
Macedonia	343	1	223	341	341001	Ohrid Agreement	34320010813	Government of Macedonia	343	UCK	1204	0	0	2001-08-13	2001-08-13	2006-08-13	3	2002-11-01	104	Rexhep Selmani (DUI); Health	UCK (1204) / DUI	November 2002, p. 4	-99
Macedonia	343	1	223	341	341001	Ohrid Agreement	34320010813	Government of Macedonia	343	UCK	1204	0	0	2001-08-13	2001-08-13	2006-08-13	3	2002-11-01	104	Milaim Ajdini (DUI); Transport & communications	UCK (1204) / DUI	November 2002, p. 4	-99
Macedonia	343	1	223	341	341001	Ohrid Agreement	34320010813	Government of Macedonia	343	UCK	1204	0	0	2001-08-13	2001-08-13	2006-08-13	4	2003-02-04	267	military integration: 1,000 former rebels into police force and army	UCK (1204) / DUI	-99	BBC Summary of the World Broadcasts, 4 February 2003
Macedonia	343	1	223	341	341001	Ohrid Agreement	34320010813	Government of Macedonia	343	UCK	1204	0	0	2001-08-13	2001-08-13	2006-08-13	4	2003-08-04	267	military integration: former rebels participate in police course	UCK (1204) / DUI	-99	BBC Summary of World Broadcasts, 4 August 2003
Macedonia	343	1	223	341	341001	Ohrid Agreement	34320010813	Government of Macedonia	343	UCK	1204	0	0	2001-08-13	2001-08-13	2006-08-13	1	2004-04-14	505	presidential elections (1st round)	-99	June 2004, p13	-99
Macedonia	343	1	223	341	341001	Ohrid Agreement	34320010813	Government of Macedonia	343	UCK	1204	0	0	2001-08-13	2001-08-13	2006-08-13	1	2004-04-28	505	presidential elections (2nd round): Branko Cvenkovski has been sworn in as president (60,5%)	-99	June 2004, p13	-99
Macedonia	343	1	223	341	341001	Ohrid Agreement	34320010813	Government of Macedonia	343	UCK	1204	0	0	2001-08-13	2001-08-13	2006-08-13	1	2004-08-11	400	territorial power-sharing: parliament approved territorial division bill		September 2004, p14	-99
Macedonia	343	1	223	341	341001	Ohrid Agreement	34320010813	Government of Macedonia	343	UCK	1204	0	0	2001-08-13	2001-08-13	2006-08-13	1	2004-11-07	506	referendum: referendum was taking place to overturn a controversial redistricting law	-99	December 2004, p14	-99
Macedonia	343	1	223	341	341001	Ohrid Agreement	34320010813	Government of Macedonia	343	UCK	1204	0	0	2001-08-13	2001-08-13	2006-08-13	3	2005-03-01	100	Political powersharing: changes of Democratic Union of Integration ministers [MO: DUI ministers leave cabinet on 26/08/2006 due to electoral defeat]	UCK (1204) / DUI	March 2005	-99
Macedonia	343	1	223	341	341001	Ohrid Agreement	34320010813	Government of Macedonia	343	UCK	1204	0	0	2001-08-13	2001-08-13	2006-08-13	3	2005-03-01	102	Economy: Fatmir Besimi (DUI)	UCK (1204) / DUI	March 2005	-99
Macedonia	343	1	223	341	341001	Ohrid Agreement	34320010813	Government of Macedonia	343	UCK	1204	0	0	2001-08-13	2001-08-13	2006-08-13	3	2005-03-01	103	New Justice Minister: Meri Mladenovska-Georgievska (SDSM)	UCK (1204) / DUI	March 2005	-99
Macedonia	343	1	223	341	341001	Ohrid Agreement	34320010813	Government of Macedonia	343	UCK	1204	0	0	2001-08-13	2001-08-13	2006-08-13	3	2005-03-01	104	Local self-government: Rizvan Sulejmani (DUI)	UCK (1204) / DUI	March 2005	-99
Macedonia	343	1	223	341	341001	Ohrid Agreement	34320010813	Government of Macedonia	343	UCK	1204	0	0	2001-08-13	2001-08-13	2006-08-13	3	2005-03-01	104	Agriculture, forestry & water supply: Sadulla Duraku (DUI)	UCK (1204) / DUI	March 2005	-99
Macedonia	343	1	223	341	341001	Ohrid Agreement	34320010813	Government of Macedonia	343	UCK	1204	0	0	2001-08-13	2001-08-13	2006-08-13	3	2005-03-01	105	New Health Minster: Vladimir Dimov (SDSM)	UCK (1204) / DUI	March 2005	-99
Macedonia	343	1	223	341	341001	Ohrid Agreement	34320010813	Government of Macedonia	343	UCK	1204	0	0	2001-08-13	2001-08-13	2006-08-13	3	2005-12-15	507	constitution: new constitutional amendments	-99	March 2006, p15	-99
Macedonia	343	1	223	341	341001	Ohrid Agreement	34320010813	Government of Macedonia	343	UCK	1204	0	0	2001-08-13	2001-08-13	2006-08-13	1	2006-08-13	2	end of 5-year period	-99	-99	UCDP
Croatia	344	1	195	303	303001	Erdut Agreement	34419951112	Government of Croatia	344	Serbian Republic of Krajina	1183	0	0	1995-11-12	1995-11-12	2000-11-12	1	1995-11-12	1	PA signature	Government of Croatia (344), Serbian Republic of Krajina (1183)	-99	PSED_promises
Croatia	344	1	195	303	303001	Erdut Agreement	34419951112	Government of Croatia	344	Serbian Republic of Krajina	1183	0	0	1995-11-12	1995-11-12	2000-11-12	1	1996-07-02	267	military integration: Joint police forces inaugurated	Serbian Republic of Krajina (1183)	-99	BBC World, 2 July 1996
Croatia	344	1	195	303	303001	Erdut Agreement	34419951112	Government of Croatia	344	Serbian Republic of Krajina	1183	0	0	1995-11-12	1995-11-12	2000-11-12	1	1997-01-13	400	territorial power-sharing: memorandum of territorial integration signed		1st quarter 1997, pg 19	-99
Croatia	344	1	195	303	303001	Erdut Agreement	34419951112	Government of Croatia	344	Serbian Republic of Krajina	1183	0	0	1995-11-12	1995-11-12	2000-11-12	1	1997-06-15	505	presidential elections: for results see raw data	-99	3rd quarter 1997, pg 21	-99
Croatia	344	1	195	303	303001	Erdut Agreement	34419951112	Government of Croatia	344	Serbian Republic of Krajina	1183	0	0	1995-11-12	1995-11-12	2000-11-12	1	2000-01-03	504	parliamentary elections: for results see raw data	-99	1st quarter 2000, pg 16	-99
Croatia	344	1	195	303	303001	Erdut Agreement	34419951112	Government of Croatia	344	Serbian Republic of Krajina	1183	0	0	1995-11-12	1995-11-12	2000-11-12	1	2000-01-24	505	presidential elections (1st round)	-99	1st quarter 2000	-99
Croatia	344	1	195	303	303001	Erdut Agreement	34419951112	Government of Croatia	344	Serbian Republic of Krajina	1183	0	0	1995-11-12	1995-11-12	2000-11-12	1	2000-02-07	505	presidential elections (2nd round)	-99	1st quarter 2000	-99
Croatia	344	1	195	303	303001	Erdut Agreement	34419951112	Government of Croatia	344	Serbian Republic of Krajina	1183	0	0	1995-11-12	1995-11-12	2000-11-12	1	2000-11-12	2	end of 5-year period	-99	-99	UCDP
Serbia	345	1	189	281	281001	Brioni Agreement	34519910708	Government of Serbia	345	Republic of Slovenia	1179	0	0	1991-07-08	1991-07-08	1992-05-22	1	1991-07-08	1	PA signature	Government of Serbia (345), Republic of Slovenia (1179)	-99	PSED_promises
Serbia	345	1	189	281	281001	Brioni Agreement	34519910708	Government of Serbia	345	Republic of Slovenia	1179	0	0	1991-07-08	1991-07-08	1992-05-22	1	1991-07-13	508	subsequent peace agreement: memorandum on EU-observer mission signed	Government of Serbia (345), Republic of Slovenia (1179)	-99	BBC World, 16 July 1991
Serbia	345	1	189	281	281001	Brioni Agreement	34519910708	Government of Serbia	345	Republic of Slovenia	1179	0	0	1991-07-08	1991-07-08	1992-05-22	1	1991-10-08	402	territorial power-sharing: autonomy introduced for Slovenia /// IMPORTANT: Slovenia gains independence on 22 May 1992 (UN admission); this event captures the de-facto independent status of Slovenia while it is formally still a part of Yugoslavia.		3rd quarter 1991, pg 18	-99
Serbia	345	1	189	281	281001	Brioni Agreement	34519910708	Government of Serbia	345	Republic of Slovenia	1179	0	0	1991-07-08	1991-07-08	1992-05-22	1	1992-05-22	2	Slovenia gains independence	-99	-99	UCDP
Serbia	345	1	218	295	295001	Kosovo Peace Plan	34519990603	Government of Serbia	345	UCK	1200	0	0	1999-06-03	1999-06-03	2004-06-03	1	1999-06-03	1	PA signature	Government of Serbia (345), UCK (1200)	-99	PSED_promises
Serbia	345	1	218	295	295001	Kosovo Peace Plan	34519990603	Government of Serbia	345	UCK	1200	0	0	1999-06-03	1999-06-03	2004-06-03	1	2000-07-06	507	constitution: constitutional changes	-99	3rd quarter 2000, pg 14	-99
Serbia	345	1	218	295	295001	Kosovo Peace Plan	34519990603	Government of Serbia	345	UCK	1200	0	0	1999-06-03	1999-06-03	2004-06-03	1	2000-09-24	504	parliamentary elections [Former Republic of Yugoslavia]	-99	4th quarter 2000, pg 15	-99
Serbia	345	1	218	295	295001	Kosovo Peace Plan	34519990603	Government of Serbia	345	UCK	1200	0	0	1999-06-03	1999-06-03	2004-06-03	1	2000-09-24	505	presidential elections: Vojislav Kostunica, 52.54% of the vote, againstMr Milosevic’s 35.01% [Former Republic of Yugoslavia]	-99	4th quarter 2000, pg 15	-99
Serbia	345	1	218	295	295001	Kosovo Peace Plan	34519990603	Government of Serbia	345	UCK	1200	0	0	1999-06-03	1999-06-03	2004-06-03	1	2003-11-16	505	presidential elections [in Serbia as part of Serbia and Montenegro; the Federal Assembly of Serbia and Montenegro as well as the President is not elected directly]	-99	December 2003, p2	-99
Serbia	345	1	218	295	295001	Kosovo Peace Plan	34519990603	Government of Serbia	345	UCK	1200	0	0	1999-06-03	1999-06-03	2004-06-03	1	2003-12-28	504	parliamentary elections [in Serbia as part of Serbia and Montenegro; the Federal Assembly of Serbia and Montenegro as well as the President is not elected directly]	-99	January 2004, 14f	-99
Serbia	345	1	218	295	295001	Kosovo Peace Plan	34519990603	Government of Serbia	345	UCK	1200	0	0	1999-06-03	1999-06-03	2004-06-03	1	2004-06-03	2	end of 5-year period	-99	-99	UCDP
Bosnia-Herzegovina	346	1	203	293	293001	Washington Agreement	34619940301	Government of Bosnia-Herzegovina	346	Croatian Republic of Bosnia-Herzegovina	1193	0	0	1994-03-01	1994-03-01	1999-03-01	1	1994-03-01	1	PA signature	Government of Bosnia-Herzegovina (346), Croatian Republic of Bosnia-Herzegovina (1193)	-99	PSED_promises
Bosnia-Herzegovina	346	1	203	293	293001	Washington Agreement	34619940301	Government of Bosnia-Herzegovina	346	Croatian Republic of Bosnia-Herzegovina	1193	0	0	1994-03-01	1994-03-01	1999-03-01	1	1994-03-18	508	subsequent peace agreement: outline of the Muslim-Croat federation of Bosnia-Herzegovina was worked out	Government of Bosnia-Herzegovina (346), Croatian Republic of Bosnia-Herzegovina (1193)	2nd quarter 1994, p11	-99
Bosnia-Herzegovina	346	1	203	293	293001	Washington Agreement	34619940301	Government of Bosnia-Herzegovina	346	Croatian Republic of Bosnia-Herzegovina	1193	0	0	1994-03-01	1994-03-01	1999-03-01	4	1994-04-28	200	military power-sharing: Bosnian Croat Ante Roso was appointed as the highest Croat representative in the joint command of the HVO and Bosnia-Hercegovina Army. Brig-General Franjo Primorac and Major Zivko Budimir have also been appointed to the joint command of the HVO and the Bosnia-Hercegovnina Army	Croatian Republic of Bosnia-Herzegovina (1193)	-99	BBC Summary of World Broadcasts, 28 April 1994
Bosnia-Herzegovina	346	1	203	293	293001	Washington Agreement	34619940301	Government of Bosnia-Herzegovina	346	Croatian Republic of Bosnia-Herzegovina	1193	0	0	1994-03-01	1994-03-01	1999-03-01	1	1994-06-22	100	cabinet change: new government was approved by the twin parliaments of the Bosnian republic and federation and Haris Silajdzik was reappointed as prime minister, while Jadranko Prlic was made deputy prime minister and minister of defence	Croatian Republic of Bosnia-Herzegovina (1193)	3rd quarter 1994, p11/12	-99
Bosnia-Herzegovina	346	1	203	293	293001	Washington Agreement	34619940301	Government of Bosnia-Herzegovina	346	Croatian Republic of Bosnia-Herzegovina	1193	0	0	1994-03-01	1994-03-01	1999-03-01	1	1994-06-22	102	New Defence Minster: Jadranko Prlic (HVO)	Croatian Republic of Bosnia-Herzegovina (1193)	3rd quarter 1994, p11/12	-99
Bosnia-Herzegovina	346	1	203	293	293001	Washington Agreement	34619940301	Government of Bosnia-Herzegovina	346	Croatian Republic of Bosnia-Herzegovina	1193	0	0	1994-03-01	1994-03-01	1999-03-01	1	1994-06-22	102	New Deputy Primeminister: Jadranko Prlic (HVO)	Croatian Republic of Bosnia-Herzegovina (1193)	3rd quarter 1994, p11/12	-99
Bosnia-Herzegovina	346	1	203	293	293001	Washington Agreement	34619940301	Government of Bosnia-Herzegovina	346	Croatian Republic of Bosnia-Herzegovina	1193	0	0	1994-03-01	1994-03-01	1999-03-01	1	1995-02-05	508	subsequent peace agreement: joint headquarters are being set up to integrate gradually the two armies, the Croat Defence Council (HVO) and the Bosnia-Hercegovina Army	Government of Bosnia-Herzegovina (346), Croatian Republic of Bosnia-Herzegovina (1193)	1st quarter 1995, p5	-99
Bosnia-Herzegovina	346	1	203	293	293001	Washington Agreement	34619940301	Government of Bosnia-Herzegovina	346	Croatian Republic of Bosnia-Herzegovina	1193	0	0	1994-03-01	1994-03-01	1999-03-01	1	1996-01-30	100	cabinet change: government of the republic of Bosnia-Hercegovina, appointed January 30, 1996 new ministers (see rawdata for more details)	Croatian Republic of Bosnia-Herzegovina (1193)	1st quarter 1996, p3	-99
Bosnia-Herzegovina	346	1	203	293	293001	Washington Agreement	34619940301	Government of Bosnia-Herzegovina	346	Croatian Republic of Bosnia-Herzegovina	1193	0	0	1994-03-01	1994-03-01	1999-03-01	1	1996-01-30	102	New Minister of Foreign Affairs: Jadranko Prlic (HVO)	Croatian Republic of Bosnia-Herzegovina (1193)	1st quarter 1996, p3	-99
Bosnia-Herzegovina	346	1	203	293	293001	Washington Agreement	34619940301	Government of Bosnia-Herzegovina	346	Croatian Republic of Bosnia-Herzegovina	1193	0	0	1994-03-01	1994-03-01	1999-03-01	1	1996-01-30	103	Old Defence Minster: Jadranko Prlic (HVO)	Croatian Republic of Bosnia-Herzegovina (1193)	1st quarter 1996, p3	-99
Bosnia-Herzegovina	346	1	203	293	293001	Washington Agreement	34619940301	Government of Bosnia-Herzegovina	346	Croatian Republic of Bosnia-Herzegovina	1193	0	0	1994-03-01	1994-03-01	1999-03-01	1	1996-01-30	103	Old Deputy Primeminister: Jadranko Prlic (HVO)	Croatian Republic of Bosnia-Herzegovina (1193)	1st quarter 1996, p3	-99
Bosnia-Herzegovina	346	1	203	293	293001	Washington Agreement	34619940301	Government of Bosnia-Herzegovina	346	Croatian Republic of Bosnia-Herzegovina	1193	0	0	1994-03-01	1994-03-01	1999-03-01	1	1996-01-30	104	New Minister of Foreign Trade & International Communications: Neven Tomic (HVO)	Croatian Republic of Bosnia-Herzegovina (1193)	1st quarter 1996, p3	-99
Bosnia-Herzegovina	346	1	203	293	293001	Washington Agreement	34619940301	Government of Bosnia-Herzegovina	346	Croatian Republic of Bosnia-Herzegovina	1193	0	0	1994-03-01	1994-03-01	1999-03-01	1	1996-01-30	104	New Minister without Portfolio: Dragoljub Stojanov (Croat)	Croatian Republic of Bosnia-Herzegovina (1193)	1st quarter 1996, p3	-99
Bosnia-Herzegovina	346	1	203	293	293001	Washington Agreement	34619940301	Government of Bosnia-Herzegovina	346	Croatian Republic of Bosnia-Herzegovina	1193	0	0	1994-03-01	1994-03-01	1999-03-01	1	1996-04-12	500	proportional representation: law introduces proportional representation	-99	-99	IPU PARLINE: http://www.ipu.org/parline-e/reports/2039_B.htm
Bosnia-Herzegovina	346	1	203	293	293001	Washington Agreement	34619940301	Government of Bosnia-Herzegovina	346	Croatian Republic of Bosnia-Herzegovina	1193	0	0	1994-03-01	1994-03-01	1999-03-01	1	1996-08-31	400	territorial power-sharing: subsequent peace agreement introduces devolution/autonomy [MO: final implementation of subsequent from 18/03/1994]		3rd quarter 1996, p7	-99
Bosnia-Herzegovina	346	1	203	293	293001	Washington Agreement	34619940301	Government of Bosnia-Herzegovina	346	Croatian Republic of Bosnia-Herzegovina	1193	0	0	1994-03-01	1994-03-01	1999-03-01	1	1996-08-31	508	subsequent peace agreement: introduces devolution/autonomy	Government of Bosnia-Herzegovina (346), Croatian Republic of Bosnia-Herzegovina (1193)	3rd quarter 1996, p7	-99
Bosnia-Herzegovina	346	1	203	293	293001	Washington Agreement	34619940301	Government of Bosnia-Herzegovina	346	Croatian Republic of Bosnia-Herzegovina	1193	0	0	1994-03-01	1994-03-01	1999-03-01	1	1996-09-14	504	parliamentary elections: majority of votes, both at the entity level and country-wide, went to the three leading nationalist parties, the (Muslim) Democratic Action Party (SDA), the Croatian Democratic Union of BiH (HDZ) and the Serbian Democratic Party (SDS) and their representatives Alija Izetbegovic, Kresimir Zubak and Momcilo Krajisnik	-99	4th quarter 1996, p8/9/10	-99
Bosnia-Herzegovina	346	1	203	293	293001	Washington Agreement	34619940301	Government of Bosnia-Herzegovina	346	Croatian Republic of Bosnia-Herzegovina	1193	0	0	1994-03-01	1994-03-01	1999-03-01	1	1996-10-02	200	military power-sharing: Bosnia's Moslem and Croats appoint joint army command	Croatian Republic of Bosnia-Herzegovina (1193)	-99	Agence France Presse, 2 October 1996
Bosnia-Herzegovina	346	1	203	293	293001	Washington Agreement	34619940301	Government of Bosnia-Herzegovina	346	Croatian Republic of Bosnia-Herzegovina	1193	0	0	1994-03-01	1994-03-01	1999-03-01	1	1996-10-07	267	military integration: Training center for future Moslem-Croat army opens	Croatian Republic of Bosnia-Herzegovina (1193)	-99	Agence France Presse, 7 October 1996
Bosnia-Herzegovina	346	1	203	293	293001	Washington Agreement	34619940301	Government of Bosnia-Herzegovina	346	Croatian Republic of Bosnia-Herzegovina	1193	0	0	1994-03-01	1994-03-01	1999-03-01	3	1997-01-31	267	military integration: a federation army has been set up	Croatian Republic of Bosnia-Herzegovina (1193)	1st quarter 1997, p10	-99
Bosnia-Herzegovina	346	1	203	293	293001	Washington Agreement	34619940301	Government of Bosnia-Herzegovina	346	Croatian Republic of Bosnia-Herzegovina	1193	0	0	1994-03-01	1994-03-01	1999-03-01	1	1997-07-21	267	military integration: establishment of a joint police force	Croatian Republic of Bosnia-Herzegovina (1193)	3nd quarter 1997. p11	-99
Bosnia-Herzegovina	346	1	203	293	293001	Washington Agreement	34619940301	Government of Bosnia-Herzegovina	346	Croatian Republic of Bosnia-Herzegovina	1193	0	0	1994-03-01	1994-03-01	1999-03-01	1	1998-01-23	267	military integration: 40 officers of the Army of Bosnia-Hercegovina complete training course in Germany	Croatian Republic of Bosnia-Herzegovina (1193)	-99	BBC Summary of World Broadcasts, 26 January 1998
Bosnia-Herzegovina	346	1	203	293	293001	Washington Agreement	34619940301	Government of Bosnia-Herzegovina	346	Croatian Republic of Bosnia-Herzegovina	1193	0	0	1994-03-01	1994-03-01	1999-03-01	1	1998-09-13	504	parliamentary elections: the Party of Democratic Action (SDA, 14 seats, 48,0 % of votes), the Serbian Democratic Party (SDS, 4 seats, 27,7%) and the Croatian Democratic Union of BiH (Bosnian HDZ, 6 seats, 19,7%) won the largest share of votes of the ethnic groups they represented	-99	4th quarter 1998, p11/12/13/14	-99
Bosnia-Herzegovina	346	1	203	293	293001	Washington Agreement	34619940301	Government of Bosnia-Herzegovina	346	Croatian Republic of Bosnia-Herzegovina	1193	0	0	1994-03-01	1994-03-01	1999-03-01	1	1999-03-01	2	end of 5-year period	-99	-99	UCDP
Bosnia-Herzegovina	346	1	194	292	292001	General Framework Agreement for Peace in Bosnia and Herzegovina (Dayton Agreement)	34619951121	Government of Bosnia-Herzegovina	346	Serbian Republic of Bosnia-Herzegovina	1182	0	0	1995-11-21	1995-11-21	2000-11-21	1	1995-11-21	1	PA signature	Government of Bosnia-Herzegovina (346), Serbian Republic of Bosnia-Herzegovina (1182)	-99	PSED_promises
Bosnia-Herzegovina	346	1	194	292	292001	General Framework Agreement for Peace in Bosnia and Herzegovina (Dayton Agreement)	34619951121	Government of Bosnia-Herzegovina	346	Serbian Republic of Bosnia-Herzegovina	1182	0	0	1995-11-21	1995-11-21	2000-11-21	1	1995-11-22	402	territorial power-sharing: division of territory is to be based on the 51:49 division put foward by the Contact Group in July 1994		4th quarter 1995, p8	-99
Bosnia-Herzegovina	346	1	194	292	292001	General Framework Agreement for Peace in Bosnia and Herzegovina (Dayton Agreement)	34619951121	Government of Bosnia-Herzegovina	346	Serbian Republic of Bosnia-Herzegovina	1182	0	0	1995-11-21	1995-11-21	2000-11-21	1	1996-04-12	500	proportional representation: law introduces proportional representation	-99	-99	IPU PARLINE: http://www.ipu.org/parline-e/reports/2039_B.htm
Bosnia-Herzegovina	346	1	194	292	292001	General Framework Agreement for Peace in Bosnia and Herzegovina (Dayton Agreement)	34619951121	Government of Bosnia-Herzegovina	346	Serbian Republic of Bosnia-Herzegovina	1182	0	0	1995-11-21	1995-11-21	2000-11-21	1	1996-09-14	504	parliamentary elections: majority of votes, both at the entity level and country-wide, went to the three leading nationalist parties, the (Mulim) Democratic Action Party (SDA), the Croatian Democratic Union of BiH (HDZ) and the Serbian Democratic Party (SDS) and their representatives Alija Izetbegovic, Kresimir Zubak and Momcilo Krajisnik	-99	4th quarter 1996, p8/9/10	-99
Bosnia-Herzegovina	346	1	194	292	292001	General Framework Agreement for Peace in Bosnia and Herzegovina (Dayton Agreement)	34619951121	Government of Bosnia-Herzegovina	346	Serbian Republic of Bosnia-Herzegovina	1182	0	0	1995-11-21	1995-11-21	2000-11-21	1	1996-12-17	100	cabinet change: new central government is agreed: two co-chairmen (prime ministers): the leader of the opposition Party for Bosnia and Hercegovina, Haris Silajdzic, who is a Bosnian Muslim, and Boro Bosic, a Bosnian Serb. The deputy prime minister is Neven Tomic, a Bosnian Croat. The minister of foreign affairs of Republika Srpska (RS), Aleksa Buha, withdrew from his post	Serbian Republic of Bosnia-Herzegovina (1182)	1st quarter 1997, p9	-99
Bosnia-Herzegovina	346	1	194	292	292001	General Framework Agreement for Peace in Bosnia and Herzegovina (Dayton Agreement)	34619951121	Government of Bosnia-Herzegovina	346	Serbian Republic of Bosnia-Herzegovina	1182	0	0	1995-11-21	1995-11-21	2000-11-21	1	1996-12-17	102	New co-chairman: Boro Bosic (Bosnia Serb)	Serbian Republic of Bosnia-Herzegovina (1182)	1st quarter 1997, p9	-99
Bosnia-Herzegovina	346	1	194	292	292001	General Framework Agreement for Peace in Bosnia and Herzegovina (Dayton Agreement)	34619951121	Government of Bosnia-Herzegovina	346	Serbian Republic of Bosnia-Herzegovina	1182	0	0	1995-11-21	1995-11-21	2000-11-21	1	1996-12-17	104	New Minister of Civil Affairs and Communications: Spasoje Albijanic (Bosnia Serb)	Serbian Republic of Bosnia-Herzegovina (1182)	1st quarter 1997, p9	-99
Bosnia-Herzegovina	346	1	194	292	292001	General Framework Agreement for Peace in Bosnia and Herzegovina (Dayton Agreement)	34619951121	Government of Bosnia-Herzegovina	346	Serbian Republic of Bosnia-Herzegovina	1182	0	0	1995-11-21	1995-11-21	2000-11-21	1	1997-07-21	267	military integration: establishment of a joint police force	Serbian Republic of Bosnia-Herzegovina (1182)	3nd quarter 1997. p11	-99
Bosnia-Herzegovina	346	1	194	292	292001	General Framework Agreement for Peace in Bosnia and Herzegovina (Dayton Agreement)	34619951121	Government of Bosnia-Herzegovina	346	Serbian Republic of Bosnia-Herzegovina	1182	0	0	1995-11-21	1995-11-21	2000-11-21	1	1998-09-13	504	parliamentary elections: the Party of Democratic Action (SDA, 14 seats, 48,0 % of votes), the Serbian Democratic Party (SDS, 4 seats, 27,7%) and the Croatian Democratic Union of BiH (Bosnian HDZ, 6 seats, 19,7%) won the largest share of votes of the ethnic groups they represented	-99	4th quarter 1998, p11/12/13/15	-99
Bosnia-Herzegovina	346	1	194	292	292001	General Framework Agreement for Peace in Bosnia and Herzegovina (Dayton Agreement)	34619951121	Government of Bosnia-Herzegovina	346	Serbian Republic of Bosnia-Herzegovina	1182	0	0	1995-11-21	1995-11-21	2000-11-21	4	1999-08-15	200	military power-sharing: the House of Representatives approved a bill to create a Federation security and intelligence service to replace AID and SNS. Under the law, there will be a joint command of forces	Serbian Republic of Bosnia-Herzegovina (1182)	3rd quarter 1999, p15	-99
Bosnia-Herzegovina	346	1	194	292	292001	General Framework Agreement for Peace in Bosnia and Herzegovina (Dayton Agreement)	34619951121	Government of Bosnia-Herzegovina	346	Serbian Republic of Bosnia-Herzegovina	1182	0	0	1995-11-21	1995-11-21	2000-11-21	1	1999-09-06	267	military integration: joint police patrols start in Brcko	Serbian Republic of Bosnia-Herzegovina (1182)	-99	Middle East News Items, 22 September 1999
Bosnia-Herzegovina	346	1	194	292	292001	General Framework Agreement for Peace in Bosnia and Herzegovina (Dayton Agreement)	34619951121	Government of Bosnia-Herzegovina	346	Serbian Republic of Bosnia-Herzegovina	1182	0	0	1995-11-21	1995-11-21	2000-11-21	1	2000-11-11	504	parliamentary elections: Federation results: Social Democratic Party (SDP) - 27,2%, Party of Democratic Action (SDA) - 27,1%, Croation Democratoc Union of BiH (19,4%); Republika Srpska: Serbian Democratic Party (SDS) - 40,1%, Party of Democratic Progress (PDP) - 15,6%, Party of Independent Social Democrats (SNSD) - Democratoc Socialist Party (DSP) - 10,8%	-99	4th quarter 2000, p11/12/13/14	-99
Bosnia-Herzegovina	346	1	194	292	292001	General Framework Agreement for Peace in Bosnia and Herzegovina (Dayton Agreement)	34619951121	Government of Bosnia-Herzegovina	346	Serbian Republic of Bosnia-Herzegovina	1182	0	0	1995-11-21	1995-11-21	2000-11-21	1	2000-11-21	2	end of 5-year period	-99	-99	UCDP
Moldova	359	1	199	367	367001	Memorandum on the Basis for Normalization of Relations between the Republic of Moldova and Transdniestria	35919970508	Government of Moldova	359	PMR	1187	0	0	1992-07-21	1997-05-08	2002-05-08	1	1997-05-08	1	PA signature	Government of Moldova (359), PMR (1187)	-99	PSED_promises
Moldova	359	1	199	367	367001	Memorandum on the Basis for Normalization of Relations between the Republic of Moldova and Transdniestria	35919970508	Government of Moldova	359	PMR	1187	0	0	1992-07-21	1997-05-08	2002-05-08	3	1997-07-15	508	subsequent peace agreement: draft agreement gives autonomy	Government of Moldova (359), PMR (1187)	3rd quarter 1997, p27-28	-99
Moldova	359	1	199	367	367001	Memorandum on the Basis for Normalization of Relations between the Republic of Moldova and Transdniestria	35919970508	Government of Moldova	359	PMR	1187	0	0	1992-07-21	1997-05-08	2002-05-08	1	1998-03-22	504	parliamentary elections: Communist Party won the greatest number of seats (40 seats / 30%), Democratic Convention (26 seats / 19,4%), Bloc for a Democratic & Prosperous Moldova (24 seats / 18,2%), Party of Democratic Forces (11 seats / 8,8%)	-99	2nd quarter 1998, p25-26	-99
Moldova	359	1	199	367	367001	Memorandum on the Basis for Normalization of Relations between the Republic of Moldova and Transdniestria	35919970508	Government of Moldova	359	PMR	1187	0	0	1992-07-21	1997-05-08	2002-05-08	1	1999-01-24	506	referendum: referendum taking place in Taraclia	regional gov't	1st quarter 1999, p26-27	-99
Moldova	359	1	199	367	367001	Memorandum on the Basis for Normalization of Relations between the Republic of Moldova and Transdniestria	35919970508	Government of Moldova	359	PMR	1187	0	0	1992-07-21	1997-05-08	2002-05-08	1	1999-03-23	506	referendum: referendum taking place about major changes to Moldova's governing structures	-99	2nd quarter 1999, p29	-99
Moldova	359	1	199	367	367001	Memorandum on the Basis for Normalization of Relations between the Republic of Moldova and Transdniestria	35919970508	Government of Moldova	359	PMR	1187	0	0	1992-07-21	1997-05-08	2002-05-08	1	2000-07-05	507	constitution: parliament introduces constitutional amendments	-99	August 2000, p33-34	-99
Moldova	359	1	199	367	367001	Memorandum on the Basis for Normalization of Relations between the Republic of Moldova and Transdniestria	35919970508	Government of Moldova	359	PMR	1187	0	0	1992-07-21	1997-05-08	2002-05-08	1	2001-02-25	504	parliamentary elections: Communist Party of Moldova (CPM) won the greatest number of seats (71 seats / 50,07%), Christian Democratic People's Party (CDPP) (11 seats ( 8,24%) and Braghis Alliance (19 seats / 13,36%)	-99	May 2001, p30	-99
Moldova	359	1	199	367	367001	Memorandum on the Basis for Normalization of Relations between the Republic of Moldova and Transdniestria	35919970508	Government of Moldova	359	PMR	1187	0	0	1992-07-21	1997-05-08	2002-05-08	3	2001-12-31	400	territorial power sharing: devolution; administrative and territorial reforms		February 2002, p33	-99
Moldova	359	1	199	367	367001	Memorandum on the Basis for Normalization of Relations between the Republic of Moldova and Transdniestria	35919970508	Government of Moldova	359	PMR	1187	0	0	1992-07-21	1997-05-08	2002-05-08	1	2002-05-08	2	end of 5-year period	-99	-99	UCDP
Georgia	372	1	197	259	259001	Declaration on measures for a political settlement of the Georgian/Abkhaz conflict	37219940404	Government of Georgia	372	Republic of Abkhazia	1185	0	0	1993-12-01	1994-04-04	1999-04-04	1	1994-04-04	1	PA signature	Government of Georgia (372), Republic of Abkhazia (1185)	-99	PSED_promises
Georgia	372	1	197	259	259001	Declaration on measures for a political settlement of the Georgian/Abkhaz conflict	37219940404	Government of Georgia	372	Republic of Abkhazia	1185	0	0	1993-12-01	1994-04-04	1999-04-04	1	1995-01-09	500	proportional representation: law introduces proportional representation	-99	-99	IPU PARLINE: http://www.ipu.org/parline-e/reports/2119_B.htm
Georgia	372	1	197	259	259001	Declaration on measures for a political settlement of the Georgian/Abkhaz conflict	37219940404	Government of Georgia	372	Republic of Abkhazia	1185	0	0	1993-12-01	1994-04-04	1999-04-04	4	1995-03-06	400	territorial power-sharing: devolution, 11 administrative regions, governors for internal affairs appointed		1st Quarter 1995	-99
Georgia	372	1	197	259	259001	Declaration on measures for a political settlement of the Georgian/Abkhaz conflict	37219940404	Government of Georgia	372	Republic of Abkhazia	1185	0	0	1993-12-01	1994-04-04	1999-04-04	1	1995-08-24	507	constitution: new constitution, first post-Sowiet; document omits important provisions that Mr Shevardnadze had hoped to adopt	-99	3rd Quarter 1995	-99
Georgia	372	1	197	259	259001	Declaration on measures for a political settlement of the Georgian/Abkhaz conflict	37219940404	Government of Georgia	372	Republic of Abkhazia	1185	0	0	1993-12-01	1994-04-04	1999-04-04	1	1995-11-05	504	parliamentary elections (1st round): Mr Shevardnadze's party, Union of Georgian Citizens, wins 90%; Abkhazians did not participate	-99	4th Quarter 1995	-99
Georgia	372	1	197	259	259001	Declaration on measures for a political settlement of the Georgian/Abkhaz conflict	37219940404	Government of Georgia	372	Republic of Abkhazia	1185	0	0	1993-12-01	1994-04-04	1999-04-04	1	1995-11-05	505	presidential elections: Mr Shevardnadze confirmed as president; Abkhazians did not participate	-99	4th Quarter 1995	-99
Georgia	372	1	197	259	259001	Declaration on measures for a political settlement of the Georgian/Abkhaz conflict	37219940404	Government of Georgia	372	Republic of Abkhazia	1185	0	0	1993-12-01	1994-04-04	1999-04-04	1	1995-11-19	504	parliamentary elections (2nd round): Mr Shevardnadze's party, Union of Georgian Citizens, wins 90%; Abkhazians did not participate	-99	-99	IPU PARLINE http://www.ipu.org/parline-e/reports/arc/2119_95.htm
Georgia	372	1	197	259	259001	Declaration on measures for a political settlement of the Georgian/Abkhaz conflict	37219940404	Government of Georgia	372	Republic of Abkhazia	1185	0	0	1993-12-01	1994-04-04	1999-04-04	3	1996-11-15	506	referendum: displaced people from Abkhazia asked to vote for or against a seperatist poll in Abkhazia; vast majority voted against	-99	4th Quarter 1996	-99
Georgia	372	1	197	259	259001	Declaration on measures for a political settlement of the Georgian/Abkhaz conflict	37219940404	Government of Georgia	372	Republic of Abkhazia	1185	0	0	1993-12-01	1994-04-04	1999-04-04	1	1998-05-26	508	subsequent peace agreement: after conflict in Abkhazia was renewed, but fighting continued	Government of Georgia (372), Republic of Abkhazia (1185)	3rd Quarter 1998	-99
Georgia	372	1	197	259	259001	Declaration on measures for a political settlement of the Georgian/Abkhaz conflict	37219940404	Government of Georgia	372	Republic of Abkhazia	1185	0	0	1993-12-01	1994-04-04	1999-04-04	1	1999-04-04	2	end of 5-year period	-99	-99	UCDP
Guinea-Bissau	404	4	216	58	58001	Agreement Between the Government of Guinea Bissau and the Self-Proclaimed Military Junta	40419981101	Government of Guinea-Bissau	404	Military Junta for the Consolidation of Democracy, Peace and Justice	1402	0	0	1998-11-01	1998-11-01	1999-01-31	1	1998-11-01	1	PA signature	Government of Guinea-Bissau (404), Military Junta for the Consolidation of Democracy, Peace and Justice (1402)	-99	PSED_promises
Guinea-Bissau	404	4	216	58	58001	Agreement Between the Government of Guinea Bissau and the Self-Proclaimed Military Junta	40419981101	Government of Guinea-Bissau	404	Military Junta for the Consolidation of Democracy, Peace and Justice	1402	0	0	1998-11-01	1998-11-01	1999-01-31	1	1998-12-08	100	political power-sharing: prime minister Francisco Fadul appointed, he is a supporter of the rebel military junta	Military Junta for the Consolidation of Democracy, Peace and Justice (1402)	1st quarter 1999	-99
Guinea-Bissau	404	4	216	58	58001	Agreement Between the Government of Guinea Bissau and the Self-Proclaimed Military Junta	40419981101	Government of Guinea-Bissau	404	Military Junta for the Consolidation of Democracy, Peace and Justice	1402	0	0	1998-11-01	1998-11-01	1999-01-31	1	1998-12-08	102	political power-sharing (senior): prime minister Francisco Fadul appointed, he is a supporter of the rebel military junta	Military Junta for the Consolidation of Democracy, Peace and Justice (1402)	1st quarter 1999	-99
Guinea-Bissau	404	4	216	58	58001	Agreement Between the Government of Guinea Bissau and the Self-Proclaimed Military Junta	40419981101	Government of Guinea-Bissau	404	Military Junta for the Consolidation of Democracy, Peace and Justice	1402	0	0	1998-11-01	1998-11-01	1999-01-31	1	1998-12-14	508	subsequent peace agreement: cabinet posts are allocated between gov't and rebels	Government of Guinea-Bissau (404), Military Junta for the Consolidation of Democracy, Peace and Justice (1402)	1st quarter 1999	-99
Guinea-Bissau	404	4	216	58	58001	Agreement Between the Government of Guinea Bissau and the Self-Proclaimed Military Junta	40419981101	Government of Guinea-Bissau	404	Military Junta for the Consolidation of Democracy, Peace and Justice	1402	0	0	1998-11-01	1998-11-01	1999-01-31	1	1999-01-12	100	political power-sharing: Coalition gvt appointed /// Viera (President), Mané (leader of military junta), new ministers with little experience	Military Junta for the Consolidation of Democracy, Peace and Justice (1402)	1st quarter 1999	-99
Guinea-Bissau	404	4	216	58	58001	Agreement Between the Government of Guinea Bissau and the Self-Proclaimed Military Junta	40419981101	Government of Guinea-Bissau	404	Military Junta for the Consolidation of Democracy, Peace and Justice	1402	0	0	1998-11-01	1998-11-01	1999-01-31	1	1999-01-12	102	political power-sharing: defence minister (Francisco Benante)	Military Junta for the Consolidation of Democracy, Peace and Justice (1402)	1st quarter 1999	-99
Guinea-Bissau	404	4	216	58	58001	Agreement Between the Government of Guinea Bissau and the Self-Proclaimed Military Junta	40419981101	Government of Guinea-Bissau	404	Military Junta for the Consolidation of Democracy, Peace and Justice	1402	0	0	1998-11-01	1998-11-01	1999-01-31	1	1999-01-12	102	political power-sharing: interior minister (Caetano N’Tchama)	Military Junta for the Consolidation of Democracy, Peace and Justice (1402)	1st quarter 1999	-99
Guinea-Bissau	404	4	216	58	58001	Agreement Between the Government of Guinea Bissau and the Self-Proclaimed Military Junta	40419981101	Government of Guinea-Bissau	404	Military Junta for the Consolidation of Democracy, Peace and Justice	1402	0	0	1998-11-01	1998-11-01	1999-01-31	1	1999-01-12	102	political power-sharing: economy & finance minister (Abubacar Dahaba)	Military Junta for the Consolidation of Democracy, Peace and Justice (1402)	1st quarter 1999	-99
Guinea-Bissau	404	4	216	58	58001	Agreement Between the Government of Guinea Bissau and the Self-Proclaimed Military Junta	40419981101	Government of Guinea-Bissau	404	Military Junta for the Consolidation of Democracy, Peace and Justice	1402	0	0	1998-11-01	1998-11-01	1999-01-31	1	1999-01-12	104	political power-sharing: social infrastructure minister (Silvester Alves)	Military Junta for the Consolidation of Democracy, Peace and Justice (1402)	1st quarter 1999	-99
Guinea-Bissau	404	4	216	58	58001	Agreement Between the Government of Guinea Bissau and the Self-Proclaimed Military Junta	40419981101	Government of Guinea-Bissau	404	Military Junta for the Consolidation of Democracy, Peace and Justice	1402	0	0	1998-11-01	1998-11-01	1999-01-31	1	1999-01-31	3	civil conflict recurrence	Government of Guinea-Bissau (404), Military Junta for the Consolidation of Democracy, Peace and Justice (1402)	-99	UCDP GED
Mali	432	4	177	96	96001	Tamanrasset Accord	43219910106	Government of Mali	432	MPA	1373	0	0	1990-12-31	1991-01-06	1996-01-06	1	1991-01-06	1	PA signature	Government of Mali (432), MPA (1373)	-99	PSED_promises
Mali	432	4	177	96	96001	Tamanrasset Accord	43219910106	Government of Mali	432	MPA	1373	0	0	1990-12-31	1991-01-06	1996-01-06	1	1991-03-30	100	political power-sharing: Iyad Ag Ghaly (MPA leader) is given post in transitional executive committee CTSP	MPA (1373)	2nd quarter 1991, pg 21	-99
Mali	432	4	177	96	96001	Tamanrasset Accord	43219910106	Government of Mali	432	MPA	1373	0	0	1990-12-31	1991-01-06	1996-01-06	1	1991-03-30	104	political power-sharing: Iyad Ag Ghaly (MPA leader) is given post in transitional executive committee CTSP; post is unspecified and therefore treated as non-senior	MPA (1373)	2nd quarter 1991, pg 21	-99
Mali	432	4	177	96	96001	Tamanrasset Accord	43219910106	Government of Mali	432	MPA	1373	0	0	1990-12-31	1991-01-06	1996-01-06	1	1991-08-08	400	territorial power-sharing: government drecree creating the Kidal Region for the Touareg population [EIU does not give precise date, date amended]		3rd quarter 1991, pg 4	-99
Mali	432	4	177	96	96001	Tamanrasset Accord	43219910106	Government of Mali	432	MPA	1373	0	0	1990-12-31	1991-01-06	1996-01-06	1	1991-12-18	508	subsequent peace agreement: Mopti accord between gov't and MFUA (MPA, FIAA, FPLA, ARLA)	Government of Mali (432), MPA (1373), FIAA, ARLA, FUA, FPLA	1st quarter 1992, pg 27	-99
Mali	432	4	177	96	96001	Tamanrasset Accord	43219910106	Government of Mali	432	MPA	1373	0	0	1990-12-31	1991-01-06	1996-01-06	1	1992-01-15	506	referendum: on new constitution	-99	1st quarter 1992, pg 25	-99
Mali	432	4	177	96	96001	Tamanrasset Accord	43219910106	Government of Mali	432	MPA	1373	0	0	1990-12-31	1991-01-06	1996-01-06	1	1992-01-15	507	constitution: new constitution / referendum	-99	1st quarter 1992, pg 25	-99
Mali	432	4	177	96	96001	Tamanrasset Accord	43219910106	Government of Mali	432	MPA	1373	0	0	1990-12-31	1991-01-06	1996-01-06	1	1992-02-23	504	parliamentary elections (1st round)	-99	2nd quarter 1992	-99
Mali	432	4	177	96	96001	Tamanrasset Accord	43219910106	Government of Mali	432	MPA	1373	0	0	1990-12-31	1991-01-06	1996-01-06	1	1992-03-09	504	parliamentary elections (2nd round)	-99	2nd quarter 1992	-99
Mali	432	4	177	96	96001	Tamanrasset Accord	43219910106	Government of Mali	432	MPA	1373	0	0	1990-12-31	1991-01-06	1996-01-06	1	1992-04-11	508	subsequent peace agreement: a full peace agreement between the Malian government and Tuareg leaders was formally signed in Bamako on April 11	Government of Mali (432), MPA (1373), FIAA	2nd quarter 1992, pg 25	-99
Mali	432	4	177	96	96001	Tamanrasset Accord	43219910106	Government of Mali	432	MPA	1373	0	0	1990-12-31	1991-01-06	1996-01-06	1	1992-04-15	505	presidential elections (1st round)	-99	2nd quarter 1992, pg 23	-99
Mali	432	4	177	96	96001	Tamanrasset Accord	43219910106	Government of Mali	432	MPA	1373	0	0	1990-12-31	1991-01-06	1996-01-06	1	1992-04-26	505	presidential elections (2nd round): Mr Konaré (reelected president); Tiéoulé Mamadou Konaté (opposing candidate)	-99	3rd quarter 1992, pg 21	-99
Mali	432	4	177	96	96001	Tamanrasset Accord	43219910106	Government of Mali	432	MPA	1373	0	0	1990-12-31	1991-01-06	1996-01-06	1	1992-06-08	100	political power-sharing: transitional executive committee CTSP is abolished; Iyad Ag Ghaly (MPA leader) loses his post in transitional executive committee CTSP	MPA (1373)	3rd quarter 1992, pg 21	-99
Mali	432	4	177	96	96001	Tamanrasset Accord	43219910106	Government of Mali	432	MPA	1373	0	0	1990-12-31	1991-01-06	1996-01-06	1	1992-06-08	105	political power-sharing: transitional executive committee CTSP is abolished; Iyad Ag Ghaly (MPA leader) loses his post in transitional executive committee CTSP	MPA (1373)	3rd quarter 1992, pg 21	-99
Mali	432	4	177	96	96001	Tamanrasset Accord	43219910106	Government of Mali	432	MPA	1373	0	0	1990-12-31	1991-01-06	1996-01-06	1	1993-02-27	267	military integration: 600 Tuareg fighters integrated (3,000 expected)	MPA (1373)	2nd quarter 1993, pg 30	-99
Mali	432	4	177	96	96001	Tamanrasset Accord	43219910106	Government of Mali	432	MPA	1373	0	0	1990-12-31	1991-01-06	1996-01-06	4	1993-05-17	100	political power-sharing: Mohamed ag Erlaf (MFUA) is now minister of environment; MFUA is umbrella group uniting Touareg rebel groups, among them the MPA	MPA (1373)	2nd quarter 1993, pg 4	-99
Mali	432	4	177	96	96001	Tamanrasset Accord	43219910106	Government of Mali	432	MPA	1373	0	0	1990-12-31	1991-01-06	1996-01-06	4	1993-05-17	104	political power-sharing: Mohamed ag Erlaf (MFUA) is now minister of environment; MFUA is umbrella group uniting Touareg rebel groups, among them the MPA	MPA (1373)	2nd quarter 1993, pg 4	-99
Mali	432	4	177	96	96001	Tamanrasset Accord	43219910106	Government of Mali	432	MPA	1373	0	0	1990-12-31	1991-01-06	1996-01-06	4	1994-04-26	100	political power-sharing: Mohamed ag Erlaf (MFUA) moves from ministry of environment to ministry of employment, civil service & labour; MFUA is umbrella group uniting Touareg rebel groups, among them the MPA	MPA (1373)	2nd quarter 1994, pg 4	-99
Mali	432	4	177	96	96001	Tamanrasset Accord	43219910106	Government of Mali	432	MPA	1373	0	0	1990-12-31	1991-01-06	1996-01-06	4	1994-04-26	104	political power-sharing: Mohamed ag Erlaf (MFUA) moves from ministry of environment to ministry of employment, civil service & labour; MFUA is umbrella group uniting Touareg rebel groups, among them the MPA	MPA (1373)	2nd quarter 1994, pg 4	-99
Mali	432	4	177	96	96001	Tamanrasset Accord	43219910106	Government of Mali	432	MPA	1373	0	0	1990-12-31	1991-01-06	1996-01-06	1	1994-10-25	100	political power-sharing: Mohamed ag Erlaf (MFUA) moves from ministry of of employment, civil service & labour to ministry of public works and transport; MFUA is umbrella group uniting Touareg rebel groups, among them the MPA	MPA (1373)	1st quarter 1995, pg 31	-99
Mali	432	4	177	96	96001	Tamanrasset Accord	43219910106	Government of Mali	432	MPA	1373	0	0	1990-12-31	1991-01-06	1996-01-06	1	1994-10-25	104	political power-sharing: Mohamed ag Erlaf (MFUA) moves from ministry of of employment, civil service & labour to ministry of public works and transport; MFUA is umbrella group uniting Touareg rebel groups, among them the MPA	MPA (1373)	1st quarter 1995, pg 31	-99
Mali	432	4	177	96	96001	Tamanrasset Accord	43219910106	Government of Mali	432	MPA	1373	0	0	1990-12-31	1991-01-06	1996-01-06	3	1995-04-15	508	subsequent peace agreement: rebel agreement reached	Government of Mali (432), MPA (1373), FIAA	3rd quarter 1995, pg 28	-99
Mali	432	4	177	96	96001	Tamanrasset Accord	43219910106	Government of Mali	432	MPA	1373	0	0	1990-12-31	1991-01-06	1996-01-06	1	1996-01-06	2	end of 5-year period	-99	-99	UCDP
Senegal	433	4	180	129	129001	Accord general de paix entre le gouvernement de la republique du Senegal el le Mouvement des forces democratique de la Casamace (MFDC)	43320041230	Government of Senegal	433	MFDC	1381	0	0	2003-12-31	2004-12-30	2009-12-30	1	2004-12-30	1	PA signature	Government of Senegal (433), MFDC (1381)	-99	PSED_promises
Senegal	433	4	180	129	129001	Accord general de paix entre le gouvernement de la republique du Senegal el le Mouvement des forces democratique de la Casamace (MFDC)	43320041230	Government of Senegal	433	MFDC	1381	0	0	2003-12-31	2004-12-30	2009-12-30	1	2007-02-25	505	presidential elections: Wade with first round victory, making second obsolete	-99	May 2007	-99
Senegal	433	4	180	129	129001	Accord general de paix entre le gouvernement de la republique du Senegal el le Mouvement des forces democratique de la Casamace (MFDC)	43320041230	Government of Senegal	433	MFDC	1381	0	0	2003-12-31	2004-12-30	2009-12-30	1	2007-06-03	504	parliamentary elections: "The ruling party, Parti démocratique sénégalais (PDS), and its Sopi 2007 coalition won a landslide victory in the legislative election held on June 3rd 2007, securing an absolute majority in the National Assembly, with 131 seats out of the 150."	-99	August, 2007	-99
Senegal	433	4	180	129	129001	Accord general de paix entre le gouvernement de la republique du Senegal el le Mouvement des forces democratique de la Casamace (MFDC)	43320041230	Government of Senegal	433	MFDC	1381	0	0	2003-12-31	2004-12-30	2009-12-30	1	2009-12-30	2	end of 5-year period	-99	-99	UCDP
Niger	436	4	255	761	761001	Paris Accord	43619930610	Government of Niger	436	FLAA	1376	0	0	1992-12-31	1993-06-10	1994-05-16	1	1993-06-10	1	PA signature	Government of Niger (436), FLAA (1376)	-99	PSED_promises
Niger	436	4	255	761	761001	Paris Accord	43619930610	Government of Niger	436	FLAA	1376	0	0	1992-12-31	1993-06-10	1994-05-16	1	1994-05-16	3	civil conflict recurrence	Government of Niger (436), FLAA (1376)	-99	UCDP Dyadic Dataset
Niger	436	4	178	111	111001	Ouagadougou Accord	43619941009	Government of Niger	436	ORA/CRA	1377	0	0	1994-10-09	1994-10-09	1999-10-09	1	1994-10-09	1	PA signature	Government of Niger (436), ORA/CRA (1377)	-99	PSED_promises
Niger	436	4	178	111	111001	Ouagadougou Accord	43619941009	Government of Niger	436	ORA/CRA	1377	0	0	1994-10-09	1994-10-09	1999-10-09	1	1995-01-15	504	parliamentary elections: president Ousmane' CDS becomes second largest grouping in the assembly,the previous opposition, dominated by the MNSD, wins power by the slimmest of margins, taking 42 of the 83 seats	-99	1995, 1st quarter	-99
Niger	436	4	178	111	111001	Ouagadougou Accord	43619941009	Government of Niger	436	ORA/CRA	1377	0	0	1994-10-09	1994-10-09	1999-10-09	1	1995-04-24	508	subsequent peace agreement: permanent peace formula signed by the government and the Tuareg rebel movements - the FLAA, FLT, FFL and ARLN - grouped under the CRA	Government of Niger (436), ORA/CRA (1377)	1995, 2nd quarter	-99
Niger	436	4	178	111	111001	Ouagadougou Accord	43619941009	Government of Niger	436	ORA/CRA	1377	0	0	1994-10-09	1994-10-09	1999-10-09	1	1996-05-12	500	proportional representation: with the 1996 constitution, proportional representation is (re-)introduced	-99	-99	Nohlen et al. (1999): Elections in Africa. A Data Handbook, p681
Niger	436	4	178	111	111001	Ouagadougou Accord	43619941009	Government of Niger	436	ORA/CRA	1377	0	0	1994-10-09	1994-10-09	1999-10-09	1	1996-05-12	506	referendum: on the draft constitution, turnout: 35%, approval by over 92%	-99	1996, 2nd quarter	-99
Niger	436	4	178	111	111001	Ouagadougou Accord	43619941009	Government of Niger	436	ORA/CRA	1377	0	0	1994-10-09	1994-10-09	1999-10-09	1	1996-05-12	507	constitution: new constitutiton enacted, approved by referendum	-99	1996, 2nd quarter	-99
Niger	436	4	178	111	111001	Ouagadougou Accord	43619941009	Government of Niger	436	ORA/CRA	1377	0	0	1994-10-09	1994-10-09	1999-10-09	1	1996-07-08	505	presidential elections: Mainassara: 52.2%, Mr Ousmane: 19.8%, Mamadou Tandja: 15.7%, Colonel Djermakoye: 4.8%, Mr Issoufou: 7.6%	-99	1996, 3rd quarter	-99
Niger	436	4	178	111	111001	Ouagadougou Accord	43619941009	Government of Niger	436	ORA/CRA	1377	0	0	1994-10-09	1994-10-09	1999-10-09	1	1996-09-12	267	military integration: process of integrating some 1,400 Tuareg fighters into the Nigerien armed forces begins	ORA/CRA (1377)	1996, 4th quarter	-99
Niger	436	4	178	111	111001	Ouagadougou Accord	43619941009	Government of Niger	436	ORA/CRA	1377	0	0	1994-10-09	1994-10-09	1999-10-09	1	1996-11-23	504	parliamentary elections: pro-Maïnassara lobby 69 seats; ANDP 8 seats; UDPS 3 seats; opposition boycotted the elections	-99	1st 1997	-99
Niger	436	4	178	111	111001	Ouagadougou Accord	43619941009	Government of Niger	436	ORA/CRA	1377	0	0	1994-10-09	1994-10-09	1999-10-09	1	1998-12-29	100	political power-sharing: Rhissa ag Boula (FLAA) becomes minister of tourism	ORA/CRA (1377)	1999, 2nd quarter	-99
Niger	436	4	178	111	111001	Ouagadougou Accord	43619941009	Government of Niger	436	ORA/CRA	1377	0	0	1994-10-09	1994-10-09	1999-10-09	1	1998-12-29	104	political power-sharing: Rhissa ag Boula (FLAA) becomes minister of tourism	ORA/CRA (1377)	1999, 2nd quarter	-99
Niger	436	4	178	111	111001	Ouagadougou Accord	43619941009	Government of Niger	436	ORA/CRA	1377	0	0	1994-10-09	1994-10-09	1999-10-09	1	1999-07-18	506	referendum: on the new constitution, turnout: 31.16%, approval: 89.57%	-99	1999, 4th quarter	-99
Niger	436	4	178	111	111001	Ouagadougou Accord	43619941009	Government of Niger	436	ORA/CRA	1377	0	0	1994-10-09	1994-10-09	1999-10-09	1	1999-07-18	507	constitution: new constitutiton enacted, approved by referendum	-99	1999, 4th quarter	-99
Niger	436	4	178	111	111001	Ouagadougou Accord	43619941009	Government of Niger	436	ORA/CRA	1377	0	0	1994-10-09	1994-10-09	1999-10-09	1	1999-10-09	2	end of 5-year period	-99	-99	UCDP
Côte D'Ivoire	437	4	225	89	89001	Linas-Marcoussis Peace Accords	43720030123	Government of Côte D'Ivoire	437	MPCI	1410	1	0	2003-01-23	2003-01-23	2003-01-24	1	2003-01-23	1	PA signature	Government of Côte D'Ivoire (437), MPCI (1410), MPIGO (1141), MJP (1409)	-99	PSED_promises
Côte D'Ivoire	437	4	225	89	89001	Linas-Marcoussis Peace Accords	43720030123	Government of Côte D'Ivoire	437	MPCI	1410	1	0	2003-01-23	2003-01-23	2003-02-19	1	2003-02-19	3	civil conflict recurrence	Government of Côte D'Ivoire (437), MPCI (1410)	-99	ACLED
Côte D'Ivoire	437	4	225	91	91001	Linas-Marcoussis Peace Accords	43720030123	Government of Côte D'Ivoire	437	MPIGO	1411	1	0	2003-01-23	2003-01-23	2003-01-24	1	2003-01-23	1	PA signature	Government of Côte D'Ivoire (437), MPCI (1410), MPIGO (1141), MJP (1409)	-99	PSED_promises
Côte D'Ivoire	437	4	225	91	91001	Linas-Marcoussis Peace Accords	43720030123	Government of Côte D'Ivoire	437	MPIGO	1411	1	0	2003-01-23	2003-01-23	2003-02-03	1	2003-02-03	3	civil conflict recurrence	Government of Côte D'Ivoire (437), MPIGO (1411)	-99	ACLED
Côte D'Ivoire	437	4	225	245	245001	Linas-Marcoussis Peace Accords	43720030123	Government of Côte D'Ivoire	437	MJP	1409	1	0	2003-01-23	2003-01-23	2003-01-24	1	2003-01-23	1	PA signature	Government of Côte D'Ivoire (437), MPCI (1410), MPIGO (1141), MJP (1409)	-99	PSED_promises
Côte D'Ivoire	437	4	225	245	245001	Linas-Marcoussis Peace Accords	43720030123	Government of Côte D'Ivoire	437	MJP	1409	1	0	2003-01-23	2003-01-23	2003-01-24	1	2003-01-24	3	civil conflict recurrence	Government of Côte D'Ivoire (437), MJP (1409)	-99	ACLED
Côte D'Ivoire	437	4	225	89	89002	Accra II	43720030307	Government of Côte D'Ivoire	437	MPCI	1410	1	1	2003-03-07	2003-03-07	2004-06-07	1	2003-03-07	1	PA signature	Government of Côte D'Ivoire (437), MPCI (1410), MPIGO (1141), MJP (1409)	-99	PSED_promises
Côte D'Ivoire	437	4	225	89	89002	Accra II	43720030307	Government of Côte D'Ivoire	437	MPCI	1410	1	1	2003-03-07	2003-03-07	2004-06-07	1	2003-04-14	100	rebels assume government posts /// New Minister for Territorial Administration Issa DiakitA(c) of the Patriotic Movement of Ivory Coast (MPCI); MPCI Ministers Mamadou KonA(c) (Scientific Research) and Moussa Dosso (Crafts and the Informal Economy); Popular Movement of the Ivorian Far West (MPIGO) and the Movement for Justice and Peace (MJP), Roger Banchi (Small and Medium Enterprises) and Youssou…	MPCI (1410)	-99	World Market Analysis, 15 April 2003
Côte D'Ivoire	437	4	225	89	89002	Accra II	43720030307	Government of Côte D'Ivoire	437	MPCI	1410	1	1	2003-03-07	2003-03-07	2004-06-07	1	2003-04-14	104	New Minister for Territorial Administration: Issa Diakit (Patriotic Movement of Ivory Coast (MPCI)	MPCI (1410)	-99	World Market Analysis, 15 April 2003
Côte D'Ivoire	437	4	225	89	89002	Accra II	43720030307	Government of Côte D'Ivoire	437	MPCI	1410	1	1	2003-03-07	2003-03-07	2004-06-07	1	2003-04-14	104	New Minister Scientific Research: Mamadou KonA(c) (MPCI)	MPCI (1410)	-99	World Market Analysis, 15 April 2003
Côte D'Ivoire	437	4	225	89	89002	Accra II	43720030307	Government of Côte D'Ivoire	437	MPCI	1410	1	1	2003-03-07	2003-03-07	2004-06-07	1	2003-04-14	104	New Minister of Crafts and the Informal Economy: Moussa Dosso (MPCI)	MPCI (1410)	-99	World Market Analysis, 15 April 2003
Côte D'Ivoire	437	4	225	89	89002	Accra II	43720030307	Government of Côte D'Ivoire	437	MPCI	1410	1	1	2003-03-07	2003-03-07	2004-06-07	3	2003-04-14	104	New Minister of Transport: Innocent Kobenan Anaky (MPCI; New Forces)	MPCI (1410)	June 2003
Côte D'Ivoire	437	4	225	89	89002	Accra II	43720030307	Government of Côte D'Ivoire	437	MPCI	1410	1	1	2003-03-07	2003-03-07	2004-06-07	3	2003-04-20	100	New Ministers	MPCI (1410)	-99	27 april 2003 18:50:00 [http://www.panapress.com/New-ivorian-communication-minister-goes-tough-on-public-media--13-481284-17-lang2-index.html] /// Africa Research Bulletin, 2003: 3, 15226
Côte D'Ivoire	437	4	225	89	89002	Accra II	43720030307	Government of Côte D'Ivoire	437	MPCI	1410	1	1	2003-03-07	2003-03-07	2004-06-07	3	2003-04-20	104	New Minister of Sports: Michel Gueu (MPCI)	MPCI (1410)	-99	27 april 2003 18:50:00 [http://www.panapress.com/New-ivorian-communication-minister-goes-tough-on-public-media--13-481284-17-lang2-index.html]
Côte D'Ivoire	437	4	225	89	89002	Accra II	43720030307	Government of Côte D'Ivoire	437	MPCI	1410	1	1	2003-03-07	2003-03-07	2004-06-07	3	2003-04-20	104	New Ministre des Victimes de guerre, des déplacés et des exilés: Messamba Koné (MPCI)	MPCI (1410)	-99	http://www.afrique-express.com/archive/OUEST/cotedivoire/cotedivoirepartis/forcesnouvelles.htm
Côte D'Ivoire	437	4	225	89	89002	Accra II	43720030307	Government of Côte D'Ivoire	437	MPCI	1410	1	1	2003-03-07	2003-03-07	2004-06-07	3	2003-04-20	104	New Minister of Communicatoin: Guillaume Soro (MPCI)	MPCI (1410)	-99	http://www.afrique-express.com/archive/OUEST/cotedivoire/cotedivoirepartis/forcesnouvelles.htm
Côte D'Ivoire	437	4	225	89	89002	Accra II	43720030307	Government of Côte D'Ivoire	437	MPCI	1410	1	1	2003-03-07	2003-03-07	2004-06-07	3	2003-09-23	100	Rebels suspended their participation in the broadbased coalition	MPCI (1410)	-99	Africa Research Bulletin (2003:10; 15494)
Côte D'Ivoire	437	4	225	89	89002	Accra II	43720030307	Government of Côte D'Ivoire	437	MPCI	1410	1	1	2003-03-07	2003-03-07	2004-06-07	3	2003-09-23	105	Old Minister for Territorial Administration: Issa Diakit (Patriotic Movement of Ivory Coast (MPCI)	MPCI (1410)	-99	Africa Research Bulletin (2003:10; 15494)
Côte D'Ivoire	437	4	225	89	89002	Accra II	43720030307	Government of Côte D'Ivoire	437	MPCI	1410	1	1	2003-03-07	2003-03-07	2004-06-07	3	2003-09-23	105	Old Minister Scientific Research: Mamadou KonA(c) (MPCI)	MPCI (1410)	-99	Africa Research Bulletin (2003:10; 15494)
Côte D'Ivoire	437	4	225	89	89002	Accra II	43720030307	Government of Côte D'Ivoire	437	MPCI	1410	1	1	2003-03-07	2003-03-07	2004-06-07	3	2003-09-23	105	Old Minister of Transport: Innocent Kobenan Anaky (MPCI; New Forces)	MPCI (1410)	-99	Africa Research Bulletin (2003:10; 15494)
Côte D'Ivoire	437	4	225	89	89002	Accra II	43720030307	Government of Côte D'Ivoire	437	MPCI	1410	1	1	2003-03-07	2003-03-07	2004-06-07	3	2003-09-23	105	Old Minister of Crafts and the Informal Economy: Moussa Dosso (MPCI)	MPCI (1410)	-99	Africa Research Bulletin (2003:10; 15494)
Côte D'Ivoire	437	4	225	89	89002	Accra II	43720030307	Government of Côte D'Ivoire	437	MPCI	1410	1	1	2003-03-07	2003-03-07	2004-06-07	3	2003-09-23	105	Old Minister of Sports: Michel Gueu (MPCI)	MPCI (1410)	-99	Africa Research Bulletin (2003:10; 15494)
Côte D'Ivoire	437	4	225	89	89002	Accra II	43720030307	Government of Côte D'Ivoire	437	MPCI	1410	1	1	2003-03-07	2003-03-07	2004-06-07	3	2003-09-23	105	Old Ministre des Victimes de guerre, des déplacés et des exilés: Messamba Koné (MPCI)	MPCI (1410)	-99	Africa Research Bulletin (2003:10; 15494)
Côte D'Ivoire	437	4	225	89	89002	Accra II	43720030307	Government of Côte D'Ivoire	437	MPCI	1410	1	1	2003-03-07	2003-03-07	2004-06-07	3	2003-09-23	105	Old Minister of Communicatoin: Guillaume Soro (MPCI)	MPCI (1410)	-99	Africa Research Bulletin (2003:10; 15494)
Côte D'Ivoire	437	4	225	89	89002	Accra II	43720030307	Government of Côte D'Ivoire	437	MPCI	1410	1	1	2003-03-07	2003-03-07	2004-06-07	1	2003-12-22	100	Ex-rebels, meeting in Bouake, on December 22nd accepted to regain their seats in cabinet.	MPCI (1410)	-99	Africa Research Bulletin (2003:12; 15559)
Côte D'Ivoire	437	4	225	89	89002	Accra II	43720030307	Government of Côte D'Ivoire	437	MPCI	1410	1	1	2003-03-07	2003-03-07	2004-06-07	1	2003-12-22	104	New Minister for Territorial Administration: Issa Diakit (Patriotic Movement of Ivory Coast (MPCI)	MPCI (1410)	-99	Africa Research Bulletin (2003:12; 15559)
Côte D'Ivoire	437	4	225	89	89002	Accra II	43720030307	Government of Côte D'Ivoire	437	MPCI	1410	1	1	2003-03-07	2003-03-07	2004-06-07	1	2003-12-22	104	New Minister Scientific Research: Mamadou KonA(c) (MPCI)	MPCI (1410)	-99	Africa Research Bulletin (2003:12; 15559)
Côte D'Ivoire	437	4	225	89	89002	Accra II	43720030307	Government of Côte D'Ivoire	437	MPCI	1410	1	1	2003-03-07	2003-03-07	2004-06-07	1	2003-12-22	104	New Minister of Transport: Innocent Kobenan Anaky (MPCI; New Forces)	MPCI (1410)	-99	Africa Research Bulletin (2003:12; 15559)
Côte D'Ivoire	437	4	225	89	89002	Accra II	43720030307	Government of Côte D'Ivoire	437	MPCI	1410	1	1	2003-03-07	2003-03-07	2004-06-07	1	2003-12-22	104	New Minister of Crafts and the Informal Economy: Moussa Dosso (MPCI)	MPCI (1410)	-99	Africa Research Bulletin (2003:12; 15559)
Côte D'Ivoire	437	4	225	89	89002	Accra II	43720030307	Government of Côte D'Ivoire	437	MPCI	1410	1	1	2003-03-07	2003-03-07	2004-06-07	1	2003-12-22	104	New Minister of Sports: Michel Gueu (MPCI)	MPCI (1410)	-99	Africa Research Bulletin (2003:12; 15559)
Côte D'Ivoire	437	4	225	89	89002	Accra II	43720030307	Government of Côte D'Ivoire	437	MPCI	1410	1	1	2003-03-07	2003-03-07	2004-06-07	1	2003-12-22	104	New Ministre des Victimes de guerre, des déplacés et des exilés: Messamba Koné (MPCI)	MPCI (1410)	-99	Africa Research Bulletin (2003:12; 15559)
Côte D'Ivoire	437	4	225	89	89002	Accra II	43720030307	Government of Côte D'Ivoire	437	MPCI	1410	1	1	2003-03-07	2003-03-07	2004-06-07	1	2003-12-22	104	New Minister of Communicatoin: Guillaume Soro (MPCI)	MPCI (1410)	-99	Africa Research Bulletin (2003:12; 15559)
Côte D'Ivoire	437	4	225	89	89002	Accra II	43720030307	Government of Côte D'Ivoire	437	MPCI	1410	1	1	2003-03-07	2003-03-07	2004-06-07	2	2004-03-25	100	former rebel groups said they were suspending their participation in the government.	MPCI (1410)	-99	Africa Research Bulletin (2004:03; 15676); Africa Research Bulletin (2004:05; 15749)
Côte D'Ivoire	437	4	225	89	89002	Accra II	43720030307	Government of Côte D'Ivoire	437	MPCI	1410	1	1	2003-03-07	2003-03-07	2004-06-07	2	2004-03-25	105	Old Minister for Territorial Administration: Issa Diakit (Patriotic Movement of Ivory Coast (MPCI)	MPCI (1410)	-99	Africa Research Bulletin (2004:03; 15676); Africa Research Bulletin (2004:05; 15749)
Côte D'Ivoire	437	4	225	89	89002	Accra II	43720030307	Government of Côte D'Ivoire	437	MPCI	1410	1	1	2003-03-07	2003-03-07	2004-06-07	2	2004-03-25	105	Old Minister Scientific Research: Mamadou KonA(c) (MPCI)	MPCI (1410)	-99	Africa Research Bulletin (2004:03; 15676); Africa Research Bulletin (2004:05; 15749)
Côte D'Ivoire	437	4	225	89	89002	Accra II	43720030307	Government of Côte D'Ivoire	437	MPCI	1410	1	1	2003-03-07	2003-03-07	2004-06-07	2	2004-03-25	105	Old Minister of Transport: Innocent Kobenan Anaky (MPCI; New Forces)	MPCI (1410)	-99	Africa Research Bulletin (2004:03; 15676); Africa Research Bulletin (2004:05; 15749)
Côte D'Ivoire	437	4	225	89	89002	Accra II	43720030307	Government of Côte D'Ivoire	437	MPCI	1410	1	1	2003-03-07	2003-03-07	2004-06-07	2	2004-03-25	105	Old Minister of Crafts and the Informal Economy: Moussa Dosso (MPCI)	MPCI (1410)	-99	Africa Research Bulletin (2004:03; 15676); Africa Research Bulletin (2004:05; 15749)
Côte D'Ivoire	437	4	225	89	89002	Accra II	43720030307	Government of Côte D'Ivoire	437	MPCI	1410	1	1	2003-03-07	2003-03-07	2004-06-07	2	2004-03-25	105	Old Minister of Sports: Michel Gueu (MPCI)	MPCI (1410)	-99	Africa Research Bulletin (2004:03; 15676); Africa Research Bulletin (2004:05; 15749)
Côte D'Ivoire	437	4	225	89	89002	Accra II	43720030307	Government of Côte D'Ivoire	437	MPCI	1410	1	1	2003-03-07	2003-03-07	2004-06-07	2	2004-03-25	105	Old Ministre des Victimes de guerre, des déplacés et des exilés: Messamba Koné (MPCI)	MPCI (1410)	-99	Africa Research Bulletin (2004:03; 15676); Africa Research Bulletin (2004:05; 15749)
Côte D'Ivoire	437	4	225	89	89002	Accra II	43720030307	Government of Côte D'Ivoire	437	MPCI	1410	1	1	2003-03-07	2003-03-07	2004-06-07	2	2004-03-25	105	Old Minister of Communicatoin: Guillaume Soro (MPCI)	MPCI (1410)	-99	Africa Research Bulletin (2004:03; 15676); Africa Research Bulletin (2004:05; 15749)
Côte D'Ivoire	437	4	225	89	89002	Accra II	43720030307	Government of Côte D'Ivoire	437	MPCI	1410	1	1	2003-03-07	2003-03-07	2004-06-07	1	2004-06-07	3	civil conflict recurrence	Government of Côte D'Ivoire (437), MPCI (1410)	-99	UCDP Encyclopedia, UCDP Termination Dataset, UCDP GED
Côte D'Ivoire	437	4	225	91	91002	Accra II	43720030307	Government of Côte D'Ivoire	437	MPIGO	1411	1	1	2003-03-07	2003-03-07	2004-06-07	1	2003-03-07	1	PA signature	Government of Côte D'Ivoire (437), MPCI (1410), MPIGO (1141), MJP (1409)	-99	PSED_promises
Côte D'Ivoire	437	4	225	91	91002	Accra II	43720030307	Government of Côte D'Ivoire	437	MPIGO	1411	1	1	2003-03-07	2003-03-07	2004-06-07	1	2003-04-14	100	rebels assume government posts /// New Minister for Territorial Administration Issa DiakitA(c) of the Patriotic Movement of Ivory Coast (MPCI); MPCI Ministers Mamadou KonA(c) (Scientific Research) and Moussa Dosso (Crafts and the Informal Economy); Popular Movement of the Ivorian Far West (MPIGO) and the Movement for Justice and Peace (MJP), Roger Banchi (Small and Medium Enterprises) and Youssou…	MPIGO (1411)	-99	World Market Analysis, 15 April 2003
Côte D'Ivoire	437	4	225	91	91002	Accra II	43720030307	Government of Côte D'Ivoire	437	MPIGO	1411	1	1	2003-03-07	2003-03-07	2004-06-07	1	2003-04-14	104	New Minister for Small and Medium Enterprises: Roger Banchi (MPIGO)	MPIGO (1411)	-99	World Market Analysis, 15 April 2003
Côte D'Ivoire	437	4	225	91	91002	Accra II	43720030307	Government of Côte D'Ivoire	437	MPIGO	1411	1	1	2003-03-07	2003-03-07	2004-06-07	3	2003-09-23	100	Rebels suspended their participation in the broadbased coalition	MPIGO (1411)	-99	Africa Research Bulletin (2003:10; 15494)
Côte D'Ivoire	437	4	225	91	91002	Accra II	43720030307	Government of Côte D'Ivoire	437	MPIGO	1411	1	1	2003-03-07	2003-03-07	2004-06-07	3	2003-09-23	105	Old Minister for Small and Medium Enterprises: Roger Banchi (MPIGO)	MPIGO (1411)	-99	Africa Research Bulletin (2003:10; 15494)
Côte D'Ivoire	437	4	225	91	91002	Accra II	43720030307	Government of Côte D'Ivoire	437	MPIGO	1411	1	1	2003-03-07	2003-03-07	2004-06-07	1	2003-12-22	100	Ex-rebels, meeting in Bouake, on December 22nd accepted to regain their seats in cabinet.	MPIGO (1411)	-99	Africa Research Bulletin (2003:12; 15559)
Côte D'Ivoire	437	4	225	91	91002	Accra II	43720030307	Government of Côte D'Ivoire	437	MPIGO	1411	1	1	2003-03-07	2003-03-07	2004-06-07	1	2003-12-22	104	New Minister for Small and Medium Enterprises: Roger Banchi (MPIGO)	MPIGO (1411)	-99	Africa Research Bulletin (2003:12; 15559)
Côte D'Ivoire	437	4	225	91	91002	Accra II	43720030307	Government of Côte D'Ivoire	437	MPIGO	1411	1	1	2003-03-07	2003-03-07	2004-06-07	2	2004-03-25	100	former rebel groups said they were suspending their participation in the government.	MPIGO (1411)	-99	Africa Research Bulletin (2004:03; 15676); Africa Research Bulletin (2004:05; 15749)
Côte D'Ivoire	437	4	225	91	91002	Accra II	43720030307	Government of Côte D'Ivoire	437	MPIGO	1411	1	1	2003-03-07	2003-03-07	2004-06-07	2	2004-03-25	105	Old Minister for Small and Medium Enterprises: Roger Banchi (MPIGO)	MPIGO (1411)	-99	Africa Research Bulletin (2004:03; 15676); Africa Research Bulletin (2004:05; 15749)
Côte D'Ivoire	437	4	225	91	91002	Accra II	43720030307	Government of Côte D'Ivoire	437	MPIGO	1411	1	1	2003-03-07	2003-03-07	2004-06-07	1	2004-06-07	3	civil conflict recurrence	Government of Côte D'Ivoire (437), MPIGO (1411)	-99	UCDP Encyclopedia, UCDP Termination Dataset, UCDP GED
Côte D'Ivoire	437	4	225	245	245002	Accra II	43720030307	Government of Côte D'Ivoire	437	MJP	1409	1	1	2003-03-07	2003-03-07	2004-06-07	1	2003-03-07	1	PA signature	Government of Côte D'Ivoire (437), MPCI (1410), MPIGO (1141), MJP (1409)	-99	PSED_promises
Côte D'Ivoire	437	4	225	245	245002	Accra II	43720030307	Government of Côte D'Ivoire	437	MJP	1409	1	1	2003-03-07	2003-03-07	2004-06-07	1	2003-04-14	100	rebels assume government posts /// New Minister for Territorial Administration Issa DiakitA(c) of the Patriotic Movement of Ivory Coast (MPCI); MPCI Ministers Mamadou KonA(c) (Scientific Research) and Moussa Dosso (Crafts and the Informal Economy); Popular Movement of the Ivorian Far West (MPIGO) and the Movement for Justice and Peace (MJP), Roger Banchi (Small and Medium Enterprises) and Youssou…	MJP (1409)	-99	World Market Analysis, 15 April 2003
Côte D'Ivoire	437	4	225	245	245002	Accra II	43720030307	Government of Côte D'Ivoire	437	MJP	1409	1	1	2003-03-07	2003-03-07	2004-06-07	1	2003-04-14	104	New Minister of Technical Education: Youssouf Soumahoro (MJP)	MJP (1409)	-99	World Market Analysis, 15 April 2003
Côte D'Ivoire	437	4	225	245	245002	Accra II	43720030307	Government of Côte D'Ivoire	437	MJP	1409	1	1	2003-03-07	2003-03-07	2004-06-07	3	2003-09-23	100	Rebels suspended their participation in the broadbased coalition	MJP (1409)	-99	Africa Research Bulletin (2003:10; 15494)
Côte D'Ivoire	437	4	225	245	245002	Accra II	43720030307	Government of Côte D'Ivoire	437	MJP	1409	1	1	2003-03-07	2003-03-07	2004-06-07	3	2003-09-23	105	Old Minister of Technical Education: Youssouf Soumahoro (MJP)	MJP (1409)	-99	Africa Research Bulletin (2003:10; 15494)
Côte D'Ivoire	437	4	225	245	245002	Accra II	43720030307	Government of Côte D'Ivoire	437	MJP	1409	1	1	2003-03-07	2003-03-07	2004-06-07	1	2003-12-22	100	Ex-rebels, meeting in Bouake, on December 22nd accepted to regain their seats in cabinet.	MJP (1409)	-99	Africa Research Bulletin (2003:12; 15559)
Côte D'Ivoire	437	4	225	245	245002	Accra II	43720030307	Government of Côte D'Ivoire	437	MJP	1409	1	1	2003-03-07	2003-03-07	2004-06-07	1	2003-12-22	104	New Minister of Technical Education: Youssouf Soumahoro (MJP)	MJP (1409)	-99	Africa Research Bulletin (2003:12; 15559)
Côte D'Ivoire	437	4	225	245	245002	Accra II	43720030307	Government of Côte D'Ivoire	437	MJP	1409	1	1	2003-03-07	2003-03-07	2004-06-07	2	2004-03-25	100	former rebel groups said they were suspending their participation in the government.	MJP (1409)	-99	Africa Research Bulletin (2004:03; 15676); Africa Research Bulletin (2004:05; 15749)
Côte D'Ivoire	437	4	225	245	245002	Accra II	43720030307	Government of Côte D'Ivoire	437	MJP	1409	1	1	2003-03-07	2003-03-07	2004-06-07	2	2004-03-25	105	Old Minister of Technical Education: Youssouf Soumahoro (MJP)	MJP (1409)	-99	Africa Research Bulletin (2004:03; 15676); Africa Research Bulletin (2004:05; 15749)
Côte D'Ivoire	437	4	225	245	245002	Accra II	43720030307	Government of Côte D'Ivoire	437	MJP	1409	1	1	2003-03-07	2003-03-07	2004-06-07	1	2004-06-07	3	civil conflict recurrence	Government of Côte D'Ivoire (437), MJP (1409)	-99	UCDP Encyclopedia, UCDP Termination Dataset, UCDP GED
Côte D'Ivoire	437	4	225	89	89003	Accra III	43720040730	Government of Côte D'Ivoire	437	MPCI	1410	1	1	2004-07-30	2004-07-30	2004-11-09	1	2004-07-30	1	PA signature	Government of Côte D'Ivoire (437), MPCI (1410)	-99	PSED_promises
Côte D'Ivoire	437	4	225	89	89003	Accra III	43720040730	Government of Côte D'Ivoire	437	MPCI	1410	1	1	2004-07-30	2004-07-30	2004-11-09	1	2004-08-05	100	ministers reintegrated /// boycotted (rebel faction) ministers	MPCI (1410)	3rd quarter 2004, pg 15	-99
Côte D'Ivoire	437	4	225	89	89003	Accra III	43720040730	Government of Côte D'Ivoire	437	MPCI	1410	1	1	2004-07-30	2004-07-30	2004-11-09	1	2004-08-05	104	New Minister for Territorial Administration: Issa Diakit (Patriotic Movement of Ivory Coast (MPCI)	MPCI (1410)	3rd quarter 2004, pg 15	-99
Côte D'Ivoire	437	4	225	89	89003	Accra III	43720040730	Government of Côte D'Ivoire	437	MPCI	1410	1	1	2004-07-30	2004-07-30	2004-11-09	1	2004-08-05	104	New Minister Scientific Research: Mamadou KonA(c) (MPCI)	MPCI (1410)	3rd quarter 2004, pg 15	-99
Côte D'Ivoire	437	4	225	89	89003	Accra III	43720040730	Government of Côte D'Ivoire	437	MPCI	1410	1	1	2004-07-30	2004-07-30	2004-11-09	1	2004-08-05	104	New Minister of Transport: Innocent Kobenan Anaky (MPCI; New Forces)	MPCI (1410)	3rd quarter 2004, pg 15	-99
Côte D'Ivoire	437	4	225	89	89003	Accra III	43720040730	Government of Côte D'Ivoire	437	MPCI	1410	1	1	2004-07-30	2004-07-30	2004-11-09	1	2004-08-05	104	New Minister of Crafts and the Informal Economy: Moussa Dosso (MPCI)	MPCI (1410)	3rd quarter 2004, pg 15	-99
Côte D'Ivoire	437	4	225	89	89003	Accra III	43720040730	Government of Côte D'Ivoire	437	MPCI	1410	1	1	2004-07-30	2004-07-30	2004-11-09	1	2004-08-05	104	New Minister of Sports: Michel Gueu (MPCI)	MPCI (1410)	3rd quarter 2004, pg 15	-99
Côte D'Ivoire	437	4	225	89	89003	Accra III	43720040730	Government of Côte D'Ivoire	437	MPCI	1410	1	1	2004-07-30	2004-07-30	2004-11-09	1	2004-08-05	104	New Ministre des Victimes de guerre, des déplacés et des exilés: Messamba Koné (MPCI)	MPCI (1410)	3rd quarter 2004, pg 15	-99
Côte D'Ivoire	437	4	225	89	89003	Accra III	43720040730	Government of Côte D'Ivoire	437	MPCI	1410	1	1	2004-07-30	2004-07-30	2004-11-09	1	2004-08-05	104	New Minister of Communicatoin: Guillaume Soro (MPCI)	MPCI (1410)	3rd quarter 2004, pg 15	-99
Côte D'Ivoire	437	4	225	89	89003	Accra III	43720040730	Government of Côte D'Ivoire	437	MPCI	1410	1	1	2004-07-30	2004-07-30	2004-11-09	1	2004-10-28	100	Guillaume Soro issued a directive on October 28th recalling government ministers from the movement back to Bouake	MPCI (1410)	-99	Africa Research Bulletin (2004:10; 15956)
Côte D'Ivoire	437	4	225	89	89003	Accra III	43720040730	Government of Côte D'Ivoire	437	MPCI	1410	1	1	2004-07-30	2004-07-30	2004-11-09	1	2004-10-28	105	Old Minister for Territorial Administration: Issa Diakit (Patriotic Movement of Ivory Coast (MPCI)	MPCI (1410)	-99	Africa Research Bulletin (2004:10; 15956)
Côte D'Ivoire	437	4	225	89	89003	Accra III	43720040730	Government of Côte D'Ivoire	437	MPCI	1410	1	1	2004-07-30	2004-07-30	2004-11-09	1	2004-10-28	105	Old Minister Scientific Research: Mamadou KonA(c) (MPCI)	MPCI (1410)	-99	Africa Research Bulletin (2004:10; 15956)
Côte D'Ivoire	437	4	225	89	89003	Accra III	43720040730	Government of Côte D'Ivoire	437	MPCI	1410	1	1	2004-07-30	2004-07-30	2004-11-09	1	2004-10-28	105	Old Minister of Transport: Innocent Kobenan Anaky (MPCI; New Forces)	MPCI (1410)	-99	Africa Research Bulletin (2004:10; 15956)
Côte D'Ivoire	437	4	225	89	89003	Accra III	43720040730	Government of Côte D'Ivoire	437	MPCI	1410	1	1	2004-07-30	2004-07-30	2004-11-09	1	2004-10-28	105	Old Minister of Crafts and the Informal Economy: Moussa Dosso (MPCI)	MPCI (1410)	-99	Africa Research Bulletin (2004:10; 15956)
Côte D'Ivoire	437	4	225	89	89003	Accra III	43720040730	Government of Côte D'Ivoire	437	MPCI	1410	1	1	2004-07-30	2004-07-30	2004-11-09	1	2004-10-28	105	Old Minister of Sports: Michel Gueu (MPCI)	MPCI (1410)	-99	Africa Research Bulletin (2004:10; 15956)
Côte D'Ivoire	437	4	225	89	89003	Accra III	43720040730	Government of Côte D'Ivoire	437	MPCI	1410	1	1	2004-07-30	2004-07-30	2004-11-09	1	2004-10-28	105	Old Ministre des Victimes de guerre, des déplacés et des exilés: Messamba Koné (MPCI)	MPCI (1410)	-99	Africa Research Bulletin (2004:10; 15956)
Côte D'Ivoire	437	4	225	89	89003	Accra III	43720040730	Government of Côte D'Ivoire	437	MPCI	1410	1	1	2004-07-30	2004-07-30	2004-11-09	1	2004-10-28	105	Old Minister of Communicatoin: Guillaume Soro (MPCI)	MPCI (1410)	-99	Africa Research Bulletin (2004:10; 15956)
Côte D'Ivoire	437	4	225	89	89003	Accra III	43720040730	Government of Côte D'Ivoire	437	MPCI	1410	1	1	2004-07-30	2004-07-30	2004-11-09	1	2004-11-09	3	civil conflict recurrence	Government of Côte D'Ivoire (437), MPCI (1410)	-99	UCDP Encyclopedia, UCDP GED
Côte D'Ivoire	437	4	225	91	91003	Accra III	43720040730	Government of Côte D'Ivoire	437	MPIGO	1411	1	1	2004-07-30	2004-07-30	2004-11-09	1	2004-07-30	1	PA signature	Government of Côte D'Ivoire (437), MPCI (1410), MPIGO (1141), MJP (1409)	-99	PSED_promises
Côte D'Ivoire	437	4	225	91	91003	Accra III	43720040730	Government of Côte D'Ivoire	437	MPIGO	1411	1	1	2004-07-30	2004-07-30	2004-11-09	1	2004-08-05	100	ministers reintegrated /// boycotted (rebel faction) ministers	MPIGO (1411)	3rd quarter 2004, pg 15	-99
Côte D'Ivoire	437	4	225	91	91003	Accra III	43720040730	Government of Côte D'Ivoire	437	MPIGO	1411	1	1	2004-07-30	2004-07-30	2004-11-09	1	2004-08-05	104	New Minister for Small and Medium Enterprises: Roger Banchi (MPIGO)	MPIGO (1411)	3rd quarter 2004, pg 15	-99
Côte D'Ivoire	437	4	225	91	91003	Accra III	43720040730	Government of Côte D'Ivoire	437	MPIGO	1411	1	1	2004-07-30	2004-07-30	2004-11-09	1	2004-10-28	100	Guillaume Soro issued a directive on October 28th recalling government ministers from the movement back to Bouake	MPIGO (1411)	-99	Africa Research Bulletin (2004:10; 15956)
Côte D'Ivoire	437	4	225	91	91003	Accra III	43720040730	Government of Côte D'Ivoire	437	MPIGO	1411	1	1	2004-07-30	2004-07-30	2004-11-09	1	2004-10-28	105	Old Minister for Small and Medium Enterprises: Roger Banchi (MPIGO)	MPIGO (1411)	-99	Africa Research Bulletin (2004:10; 15956)
Côte D'Ivoire	437	4	225	91	91003	Accra III	43720040730	Government of Côte D'Ivoire	437	MPIGO	1411	1	1	2004-07-30	2004-07-30	2004-11-09	1	2004-11-09	3	civil conflict recurrence	Government of Côte D'Ivoire (437), MPIGO (1411)	-99	UCDP Encyclopedia, UCDP GED
Côte D'Ivoire	437	4	225	245	245003	Accra III	43720040730	Government of Côte D'Ivoire	437	MJP	1409	1	1	2004-07-30	2004-07-30	2004-11-09	1	2004-07-30	1	PA signature	Government of Côte D'Ivoire (437), MPCI (1410), MPIGO (1141), MJP (1409)	-99	PSED_promises
Côte D'Ivoire	437	4	225	245	245003	Accra III	43720040730	Government of Côte D'Ivoire	437	MJP	1409	1	1	2004-07-30	2004-07-30	2004-11-09	1	2004-08-05	100	ministers reintegrated /// boycotted (rebel faction) ministers	MJP (1409)	3rd quarter 2004, pg 15	-99
Côte D'Ivoire	437	4	225	245	245003	Accra III	43720040730	Government of Côte D'Ivoire	437	MJP	1409	1	1	2004-07-30	2004-07-30	2004-11-09	1	2004-08-05	104	New Minister of Technical Education: Youssouf Soumahoro (MJP)	MJP (1409)	3rd quarter 2004, pg 15	-99
Côte D'Ivoire	437	4	225	245	245003	Accra III	43720040730	Government of Côte D'Ivoire	437	MJP	1409	1	1	2004-07-30	2004-07-30	2004-11-09	1	2004-10-28	100	Guillaume Soro issued a directive on October 28th recalling government ministers from the movement back to Bouake	MJP (1409)	-99	Africa Research Bulletin (2004:10; 15956)
Côte D'Ivoire	437	4	225	245	245003	Accra III	43720040730	Government of Côte D'Ivoire	437	MJP	1409	1	1	2004-07-30	2004-07-30	2004-11-09	1	2004-10-28	105	Old Minister of Technical Education: Youssouf Soumahoro (MJP)	MJP (1409)	-99	Africa Research Bulletin (2004:10; 15956)
Côte D'Ivoire	437	4	225	245	245003	Accra III	43720040730	Government of Côte D'Ivoire	437	MJP	1409	1	1	2004-07-30	2004-07-30	2004-11-09	1	2004-11-09	3	civil conflict recurrence	Government of Côte D'Ivoire (437), MJP (1409)	-99	UCDP Encyclopedia, UCDP GED
Côte D'Ivoire	437	4	225	439	439001	Pretoria Agreement on the Peace Process in Côte d'Ivoire	43720050406	Government of Côte D'Ivoire	437	FRCI	1412	0	1	2004-12-31	2005-04-06	2010-04-06	1	2005-04-06	1	PA signature	Government of Côte D'Ivoire (437), FRCI (1412)	-99	PSED_promises
Côte D'Ivoire	437	4	225	439	439001	Pretoria Agreement on the Peace Process in Côte d'Ivoire	43720050406	Government of Côte D'Ivoire	437	FRCI	1412	0	1	2004-12-31	2005-04-06	2010-04-06	1	2005-07-10	508	subsequent peace agreement: agreement on DDR process	Government of Côte D'Ivoire (437), FRCI (1412)	-99	Xinhua News Agency, 10 July 2005
Côte D'Ivoire	437	4	225	439	439001	Pretoria Agreement on the Peace Process in Côte d'Ivoire	43720050406	Government of Côte D'Ivoire	437	FRCI	1412	0	1	2004-12-31	2005-04-06	2010-04-06	1	2005-10-14	508	subsequent peace agreement: interim government established	Government of Côte D'Ivoire (437), FRCI (1412)	1st quarter 2006, page 15	-99
Côte D'Ivoire	437	4	225	439	439001	Pretoria Agreement on the Peace Process in Côte d'Ivoire	43720050406	Government of Côte D'Ivoire	437	FRCI	1412	0	1	2004-12-31	2005-04-06	2010-04-06	1	2005-12-28	100	new cabinet announced	FRCI (1412)	1st quarter 2006, page 16	-99
Côte D'Ivoire	437	4	225	439	439001	Pretoria Agreement on the Peace Process in Côte d'Ivoire	43720050406	Government of Côte D'Ivoire	437	FRCI	1412	0	1	2004-12-31	2005-04-06	2010-04-06	1	2005-12-28	102	New Minister of Justice and Human Rights: Mamadou Koné (New Forces)	FRCI (1412)	-99	Africa Research Bulletin 2006:09; 16781f.
Côte D'Ivoire	437	4	225	439	439001	Pretoria Agreement on the Peace Process in Côte d'Ivoire	43720050406	Government of Côte D'Ivoire	437	FRCI	1412	0	1	2004-12-31	2005-04-06	2010-04-06	1	2005-12-28	104	New Minister of State for Reconstruction and Reintegration: Guillaume Soro (New Forces)	FRCI (1412)	-99	Full cabinet list: http://www.panapress.com/The-full-list-of-Cote-d-ivoire-s-transition-cabinet--13-577442-18-lang1-index.html
Côte D'Ivoire	437	4	225	439	439001	Pretoria Agreement on the Peace Process in Côte d'Ivoire	43720050406	Government of Côte D'Ivoire	437	FRCI	1412	0	1	2004-12-31	2005-04-06	2010-04-06	1	2005-12-28	104	New Minister of Solidarity and War Victims: Louis Andre Dakoury-Tabley (New Forces)	FRCI (1412)	-99	Africa Research Bulletin 2006:09; 16781f.
Côte D'Ivoire	437	4	225	439	439001	Pretoria Agreement on the Peace Process in Côte d'Ivoire	43720050406	Government of Côte D'Ivoire	437	FRCI	1412	0	1	2004-12-31	2005-04-06	2010-04-06	1	2005-12-28	104	New Minister of Trade: Moussa Dosso (New Forces)	FRCI (1412)	-99	Africa Research Bulletin 2006:09; 16781f.
Côte D'Ivoire	437	4	225	439	439001	Pretoria Agreement on the Peace Process in Côte d'Ivoire	43720050406	Government of Côte D'Ivoire	437	FRCI	1412	0	1	2004-12-31	2005-04-06	2010-04-06	1	2005-12-28	104	New Minister of Technical Education: Youssouf Soumahoro (MJP)	FRCI (1412)	-99	Africa Research Bulletin 2006:09; 16781f.
Côte D'Ivoire	437	4	225	439	439001	Pretoria Agreement on the Peace Process in Côte d'Ivoire	43720050406	Government of Côte D'Ivoire	437	FRCI	1412	0	1	2004-12-31	2005-04-06	2010-04-06	1	2005-12-28	104	New Minister of Tourism and Crafts: Amadou Koné (New Forces)	FRCI (1412)	-99	Africa Research Bulletin 2006:09; 16781f.
Côte D'Ivoire	437	4	225	439	439001	Pretoria Agreement on the Peace Process in Côte d'Ivoire	43720050406	Government of Côte D'Ivoire	437	FRCI	1412	0	1	2004-12-31	2005-04-06	2010-04-06	1	2007-03-04	508	subsequent peace agreement: agreement between Gbagbo and Soro	Government of Côte D'Ivoire (437), FRCI (1412)	1st quarter 2007, pg 13	-99
Côte D'Ivoire	437	4	225	439	439001	Pretoria Agreement on the Peace Process in Côte d'Ivoire	43720050406	Government of Côte D'Ivoire	437	FRCI	1412	0	1	2004-12-31	2005-04-06	2010-04-06	1	2007-03-17	200	military power-sharing: joint army commando with NF	FRCI (1412)	-99	BBC Africa, 18 March 2007
Côte D'Ivoire	437	4	225	439	439001	Pretoria Agreement on the Peace Process in Côte d'Ivoire	43720050406	Government of Côte D'Ivoire	437	FRCI	1412	0	1	2004-12-31	2005-04-06	2010-04-06	1	2007-04-05	100	Mr Soro assigned prime minister by decree	FRCI (1412)	2nd quarter 2007, pg 14	-99
Côte D'Ivoire	437	4	225	439	439001	Pretoria Agreement on the Peace Process in Côte d'Ivoire	43720050406	Government of Côte D'Ivoire	437	FRCI	1412	0	1	2004-12-31	2005-04-06	2010-04-06	1	2007-04-05	102	New Prime Minister: Guillaume Soro (New Forces)	FRCI (1412)	-99	Africa Research Bulletin 2007:04; 17038
Côte D'Ivoire	437	4	225	439	439001	Pretoria Agreement on the Peace Process in Côte d'Ivoire	43720050406	Government of Côte D'Ivoire	437	FRCI	1412	0	1	2004-12-31	2005-04-06	2010-04-06	1	2007-04-05	104	New Minister of Commerce: Youssouf Soumahoro (New Forces)	FRCI (1412)	-99	Africa Research Bulletin 2007:04; 17038
Côte D'Ivoire	437	4	225	439	439001	Pretoria Agreement on the Peace Process in Côte d'Ivoire	43720050406	Government of Côte D'Ivoire	437	FRCI	1412	0	1	2004-12-31	2005-04-06	2010-04-06	1	2007-04-05	104	New Minister of African Integration and Government Spokesperson: Amadou Koné (New Forces)	FRCI (1412)	-99	Africa Research Bulletin 2007:04; 17038
Côte D'Ivoire	437	4	225	439	439001	Pretoria Agreement on the Peace Process in Côte d'Ivoire	43720050406	Government of Côte D'Ivoire	437	FRCI	1412	0	1	2004-12-31	2005-04-06	2010-04-06	1	2007-04-05	105	Old Minister of State for Reconstruction and Reintegration: Guillaume Soro (New Forces)	FRCI (1412)	-99	Africa Research Bulletin 2007:04; 17038
Côte D'Ivoire	437	4	225	439	439001	Pretoria Agreement on the Peace Process in Côte d'Ivoire	43720050406	Government of Côte D'Ivoire	437	FRCI	1412	0	1	2004-12-31	2005-04-06	2010-04-06	1	2007-04-05	105	Old Minister of Technical Education: Youssouf Soumahoro (MJP)	FRCI (1412)	-99	Africa Research Bulletin 2007:04; 17038
Côte D'Ivoire	437	4	225	439	439001	Pretoria Agreement on the Peace Process in Côte d'Ivoire	43720050406	Government of Côte D'Ivoire	437	FRCI	1412	0	1	2004-12-31	2005-04-06	2010-04-06	1	2007-04-30	267	military integration: joint force launched	FRCI (1412)	-99	Global Insight, 1 May 2007
Côte D'Ivoire	437	4	225	439	439001	Pretoria Agreement on the Peace Process in Côte d'Ivoire	43720050406	Government of Côte D'Ivoire	437	FRCI	1412	0	1	2004-12-31	2005-04-06	2010-04-06	1	2008-12-22	267	military integration: 5,000 fighters	FRCI (1412)	-99	Agence France Press, 22 December 2008
Côte D'Ivoire	437	4	225	439	439001	Pretoria Agreement on the Peace Process in Côte d'Ivoire	43720050406	Government of Côte D'Ivoire	437	FRCI	1412	0	1	2004-12-31	2005-04-06	2010-04-06	1	2008-12-24	508	subsequent peace agreement: “Ouaga IV” (framework for demobilising an estimated 36,000 rebel troops and an unknown number of militia forces, integrating some into the national army and police force)	Government of Côte D'Ivoire (437), FRCI (1412)	January 2009, pg 8	-99
Côte D'Ivoire	437	4	225	439	439001	Pretoria Agreement on the Peace Process in Côte d'Ivoire	43720050406	Government of Côte D'Ivoire	437	FRCI	1412	0	1	2004-12-31	2005-04-06	2010-04-06	1	2009-11-17	267	military integration: president signs decrees for rebel army integration	FRCI (1412)	-99	BBC Africa, 17 November 2009
Côte D'Ivoire	437	4	225	439	439001	Pretoria Agreement on the Peace Process in Côte d'Ivoire	43720050406	Government of Côte D'Ivoire	437	FRCI	1412	0	1	2004-12-31	2005-04-06	2010-04-06	1	2010-01-20	267	military integration: army integration of rebels started: 20,000	FRCI (1412)	-99	BBC Africa, 21 January 2010
Côte D'Ivoire	437	4	225	439	439001	Pretoria Agreement on the Peace Process in Côte d'Ivoire	43720050406	Government of Côte D'Ivoire	437	FRCI	1412	0	1	2004-12-31	2005-04-06	2010-04-06	4	2010-03-15	100	new cabinet: Agriculture Mamadou Sangafowa Coulibaly (RDR); Civil service & employment Emile Guirieoulou (FPI); Construction & housing Tiemoko Meyliet Kone (FPI); Defence Michel Amani N!Guessan (FPI); Economy & finance Charles Koffi Diby (no affiliation); Education Gilbert Bleu-Lainé (FPI); Environment, water & forests Karim Fadiga (PIT); Family, women & social affairs Jeanne Peuhmond (RDR); Fore…	FRCI (1412)	March 2010, pg 22	-99
Côte D'Ivoire	437	4	225	439	439001	Pretoria Agreement on the Peace Process in Côte d'Ivoire	43720050406	Government of Côte D'Ivoire	437	FRCI	1412	0	1	2004-12-31	2005-04-06	2010-04-06	4	2010-03-15	104	New Minister of Communication and Government Spokesman: Ibrahim Sy Savané (New Forces)	FRCI (1412)	-99	African Research Bulletin 2010:03; 18324
Côte D'Ivoire	437	4	225	439	439001	Pretoria Agreement on the Peace Process in Côte d'Ivoire	43720050406	Government of Côte D'Ivoire	437	FRCI	1412	0	1	2004-12-31	2005-04-06	2010-04-06	4	2010-03-15	104	New Minister of Construction, City Planning, and Housing: Tiemoko Meyliet Koné (New Forces)	FRCI (1412)	-99	African Research Bulletin 2010:03; 18324
Côte D'Ivoire	437	4	225	439	439001	Pretoria Agreement on the Peace Process in Côte d'Ivoire	43720050406	Government of Côte D'Ivoire	437	FRCI	1412	0	1	2004-12-31	2005-04-06	2010-04-06	4	2010-03-15	105	Old Minister of Commerce: Youssouf Soumahoro (New Forces)	FRCI (1412)	-99	African Research Bulletin 2010:03; 18324
Côte D'Ivoire	437	4	225	439	439001	Pretoria Agreement on the Peace Process in Côte d'Ivoire	43720050406	Government of Côte D'Ivoire	437	FRCI	1412	0	1	2004-12-31	2005-04-06	2010-04-06	4	2010-03-15	105	Old Minister of African Integration and Government Spokesperson: Amadou Koné (New Forces)	FRCI (1412)	-99	African Research Bulletin 2010:03; 18324
Côte D'Ivoire	437	4	225	439	439001	Pretoria Agreement on the Peace Process in Côte d'Ivoire	43720050406	Government of Côte D'Ivoire	437	FRCI	1412	0	1	2004-12-31	2005-04-06	2010-04-06	4	2010-03-15	105	Old Minister of Solidarity and War Victims: Louis Andre Dakoury-Tabley (New Forces)	FRCI (1412)	-99	African Research Bulletin 2010:03; 18324
Côte D'Ivoire	437	4	225	439	439001	Pretoria Agreement on the Peace Process in Côte d'Ivoire	43720050406	Government of Côte D'Ivoire	437	FRCI	1412	0	1	2004-12-31	2005-04-06	2010-04-06	1	2010-04-06	2	end of 5-year period	-99	-99	UCDP
Liberia	450	4	146	94	94001	Banjul III Agreement	45019901024	Government of Liberia	450	INPFL	1359	0	0	1990-10-24	1990-10-24	1990-12-21	1	1990-10-24	1	PA signature	Government of Liberia (450), INPFL (1359)	-99	PSED_promises
Liberia	450	4	146	94	94001	Banjul III Agreement	45019901024	Government of Liberia	450	INPFL	1359	0	0	1990-10-24	1990-10-24	1990-12-21	1	1990-12-20	508	subsequent peace agreement: Banjul IV Agreement (UCDP Encyclopedia)	Government of Liberia (450), NPFL (1358), INPFL (1359)	-99	UCDP Encyclopedia
Liberia	450	4	146	94	94001	Banjul III Agreement	45019901024	Government of Liberia	450	INPFL	1359	0	0	1990-10-24	1990-10-24	1990-12-21	1	1990-12-21	3	civil conflict recurrence	Government of Liberia (450), INPFL (1359)	-99	UCDP Encyclopedia
Liberia	450	4	146	93	93001	Banjul IV Agreement	45019901221	Government of Liberia	450	NPFL	1358	1	0	1990-12-21	1990-12-21	1992-10-31	1	1990-12-21	1	PA signature	Government of Liberia (450), NPFL (1358), INPFL (1359)	-99	PSED_promises
Liberia	450	4	146	93	93001	Banjul IV Agreement	45019901221	Government of Liberia	450	NPFL	1358	1	0	1990-12-21	1990-12-21	1992-10-31	3	1991-01-31	121	political power-sharing (rebel group quota in parliament): there are quotas for - at least - NPFL (2 seats) and INPFL (5 seats) in the interim legislative assembly	NPFL (1358)	-99	Afrika-Jahrbuch 1991, p117 /// Africa Research Bulletin, 10244, 9, 1991
Liberia	450	4	146	93	93001	Banjul IV Agreement	45019901221	Government of Liberia	450	NPFL	1358	1	0	1990-12-21	1990-12-21	1992-10-31	1	1991-02-13	508	subsequent peace agreement: Lome Peace Agreement (UCDP Encyclopedia); Dr Sawyer contined to meet with Mr Taylor and the rival rebel leader, Prince Yormie Johnson of the INPFL. The Meetings took place in Lomé and were regular throughout the rest of February. On March 1 a new agreement was signed by the three leaders pleding cntinued cooperation with the efforts of Ecowas heads of state in institut…	Government of Liberia (450), NPFL (1358), INPFL (1359)	No 2 - 1991	-99
Liberia	450	4	146	93	93001	Banjul IV Agreement	45019901221	Government of Liberia	450	NPFL	1358	1	0	1990-12-21	1990-12-21	1992-10-31	1	1991-10-30	508	subsequent peace agreement: Yamoussoukro IV Peace Agreement (UCDP Encyclopedia)	Government of Liberia (450), NPFL (1358), INPFL (1359)	No 1 - 1992	-99
Liberia	450	4	146	93	93001	Banjul IV Agreement	45019901221	Government of Liberia	450	NPFL	1358	1	0	1990-12-21	1990-12-21	1992-10-31	1	1992-04-07	508	subsequent peace agreement: On April 6 [...] Sawyer, [...], Charles Taylor, [...] met, [...], at the private residence in Geneva [...]. They were gathered for two days of talks on the well discussed subject of how to secure a peaceful transition [...]. A communiqué on April 7 stated that all parties had signed an accord [in Geneva] to the effect that the process worked out in Yamoussoukro [...] r…	Government of Liberia (450), NPFL (1358)	No 2 - 1992	-99
Liberia	450	4	146	93	93001	Banjul IV Agreement	45019901221	Government of Liberia	450	NPFL	1358	1	0	1990-12-21	1990-12-21	1992-10-31	3	1992-10-31	3	civil conflict recurrence	Government of Liberia (450), NPFL (1358)	-99	UCDP Encyclopedia
Liberia	450	4	146	94	94002	Banjul IV Agreement	45019901221	Government of Liberia	450	INPFL	1359	1	1	1990-12-21	1990-12-21	1992-10-31	1	1990-12-21	1	PA signature	Government of Liberia (450), NPFL (1358), INPFL (1359)	-99	PSED_promises
Liberia	450	4	146	94	94002	Banjul IV Agreement	45019901221	Government of Liberia	450	INPFL	1359	1	1	1990-10-19	1990-12-21	1992-10-31	3	1991-01-31	121	political power-sharing (rebel group quota in parliament): there are quotas for - at least - NPFL (2 seats) and INPFL (5 seats) in the interim legislative assembly	INPFL (1359)	-99	Afrika-Jahrbuch 1991, p117 /// Africa Research Bulletin, 10244, 9, 1991
Liberia	450	4	146	94	94002	Banjul IV Agreement	45019901221	Government of Liberia	450	INPFL	1359	1	1	1990-10-19	1990-12-21	1992-10-31	1	1991-02-13	508	subsequent peace agreement: Lome Peace Agreement (UCDP Encyclopedia); Dr Sawyer contined to meet with Mr Taylor and the rival rebel leader, Prince Yormie Johnson of the INPFL. The Meetings took place in Lomé and were regular throughout the rest of February. On March 1 a new agreement was signed by the three leaders pleding cntinued cooperation with the efforts of Ecowas heads of state in institut…	Government of Liberia (450), NPFL (1358), INPFL (1359)	No 2 - 1991	-99
Liberia	450	4	146	94	94002	Banjul IV Agreement	45019901221	Government of Liberia	450	INPFL	1359	1	1	1990-10-19	1990-12-21	1992-10-31	1	1991-04-19	100	political power-sharing: Peter Naigow (INPFL) becomes inteirm vice-president	INPFL (1359)	-99	BOOK: A Political Chronology of Africa, Europa Publications, (http://books.google.de/books?id=0O86sZdHfHUC&pg=PT240&lpg=PT240&dq=peter+naigow+liberia+interim+government&source=bl&ots=_RIYrtDPAv&sig=pfj3VFh-WM-vgK40l_jIbNB8OmU&hl=en&sa=X&ei=2r8wUffiO8iytAbduYCwDA&ved=0CDkQ6AEwAA)
Liberia	450	4	146	94	94002	Banjul IV Agreement	45019901221	Government of Liberia	450	INPFL	1359	1	1	1990-10-19	1990-12-21	1992-10-31	1	1991-04-19	102	political power-sharing: Peter Naigow (INPFL) becomes inteirm vice-president	INPFL (1359)	-99	BOOK: A Political Chronology of Africa, Europa Publications, (http://books.google.de/books?id=0O86sZdHfHUC&pg=PT240&lpg=PT240&dq=peter+naigow+liberia+interim+government&source=bl&ots=_RIYrtDPAv&sig=pfj3VFh-WM-vgK40l_jIbNB8OmU&hl=en&sa=X&ei=2r8wUffiO8iytAbduYCwDA&ved=0CDkQ6AEwAA)
Liberia	450	4	146	94	94002	Banjul IV Agreement	45019901221	Government of Liberia	450	INPFL	1359	1	1	1990-10-19	1990-12-21	1992-10-31	1	1991-06-21	100	political power-sharing: Jonathan Mason (INPFL) is minister for lands, mines and energy minister	INPFL (1359)	No 3 - 1991	BOOK: A Political Chronology of Africa, Europa Publications, (http://books.google.de/books?id=0O86sZdHfHUC&pg=PT240&lpg=PT240&dq=peter+naigow+liberia+interim+government&source=bl&ots=_RIYrtDPAv&sig=pfj3VFh-WM-vgK40l_jIbNB8OmU&hl=en&sa=X&ei=2r8wUffiO8iytAbduYCwDA&ved=0CDkQ6AEwAA)
Liberia	450	4	146	94	94002	Banjul IV Agreement	45019901221	Government of Liberia	450	INPFL	1359	1	1	1990-10-19	1990-12-21	1992-10-31	1	1991-06-21	102	political power-sharing: Jonathan Mason (INPFL) is minister for lands, mines and energy minister	INPFL (1359)	No 3 - 1991	BOOK: A Political Chronology of Africa, Europa Publications, (http://books.google.de/books?id=0O86sZdHfHUC&pg=PT240&lpg=PT240&dq=peter+naigow+liberia+interim+government&source=bl&ots=_RIYrtDPAv&sig=pfj3VFh-WM-vgK40l_jIbNB8OmU&hl=en&sa=X&ei=2r8wUffiO8iytAbduYCwDA&ved=0CDkQ6AEwAA)
Liberia	450	4	146	94	94002	Banjul IV Agreement	45019901221	Government of Liberia	450	INPFL	1359	1	1	1990-10-19	1990-12-21	1992-10-31	1	1991-08-16	100	political power-sharing: INPFL withdraws from the interim government	INPFL (1359)	No 3 - 1991	Africa Research Bulletin, 10244, 8, 1991
Liberia	450	4	146	94	94002	Banjul IV Agreement	45019901221	Government of Liberia	450	INPFL	1359	1	1	1990-10-19	1990-12-21	1992-10-31	1	1991-08-16	103	political power-sharing: Peter Naigow (INPFL) resigns as interim vice-president	INPFL (1359)	No 3 - 1991	Africa Research Bulletin, 10244, 8, 1991
Liberia	450	4	146	94	94002	Banjul IV Agreement	45019901221	Government of Liberia	450	INPFL	1359	1	1	1990-10-19	1990-12-21	1992-10-31	1	1991-08-16	103	political power-sharing: Jonathan Mason (INPFL) resigns as minister for lands, mines and energy minister	INPFL (1359)	No 3 - 1991	Africa Research Bulletin, 10244, 8, 1991
Liberia	450	4	146	94	94002	Banjul IV Agreement	45019901221	Government of Liberia	450	INPFL	1359	1	1	1990-10-19	1990-12-21	1992-10-31	1	1991-10-30	508	subsequent peace agreement: Yamoussoukro IV Peace Agreement (UCDP Encyclopedia)	Government of Liberia (450), NPFL (1358), INPFL (1359)	No 1 - 1992	-99
Liberia	450	4	146	94	94002	Banjul IV Agreement	45019901221	Government of Liberia	450	INPFL	1359	1	1	1990-10-19	1990-12-21	1992-10-31	3	1992-10-31	3	civil conflict recurrence	Government of Liberia (450), INPFL (1359)	-99	UCDP Encyclopedia
Liberia	450	4	146	95	95001	Accra Peace Agreement	45020030818	Government of Liberia	450	LURD	1360	1	0	2003-08-18	2003-08-18	2008-08-18	1	2003-08-18	1	PA signature	Government of Liberia (450), LURD (1360), MODEL (1361)	-99	PSED_promises
Liberia	450	4	146	95	95001	Accra Peace Agreement	45020030818	Government of Liberia	450	LURD	1360	1	0	2003-08-18	2003-08-18	2008-08-18	1	2003-08-19	121	political power-sharing (rebel group quota in parliament): quotas in the national parliament are introduced	LURD (1360)	September 2003, p13	-99
Liberia	450	4	146	95	95001	Accra Peace Agreement	45020030818	Government of Liberia	450	LURD	1360	1	0	2003-08-18	2003-08-18	2008-08-18	1	2003-10-15	300	economic power-sharing: rebels take over parastatals ("as well as control of a variety of parastatals and other government agencies")	LURD (1360)	September 2003, p11/12 / March 2006, p11	-99
Liberia	450	4	146	95	95001	Accra Peace Agreement	45020030818	Government of Liberia	450	LURD	1360	1	0	2003-08-18	2003-08-18	2008-08-18	1	2003-10-15	302	economic power-sharing: rebels take over parastatals ("as well as control of a variety of parastatals and other government agencies")	LURD (1360)	September 2003, p11/12 / March 2006, p11	-99
Liberia	450	4	146	95	95001	Accra Peace Agreement	45020030818	Government of Liberia	450	LURD	1360	1	0	2003-08-18	2003-08-18	2008-08-18	3	2003-10-30	100	political power-sharing: rebel groups LURD and MODEL get posts in the National Transitional Government of Liberia (NTGL)	LURD (1360)	December 2003, p12	-99
Liberia	450	4	146	95	95001	Accra Peace Agreement	45020030818	Government of Liberia	450	LURD	1360	1	0	2003-08-18	2003-08-18	2008-08-18	3	2003-10-30	102	political power-sharing: Kabineh Ja’neh (LURD) is named justice minister	LURD (1360)	December 2003, p12	-99
Liberia	450	4	146	95	95001	Accra Peace Agreement	45020030818	Government of Liberia	450	LURD	1360	1	0	2003-08-18	2003-08-18	2008-08-18	3	2003-10-30	102	political power-sharing: Luseni Kamara (LURD) is named finance minister	LURD (1360)	December 2003, p12	-99
Liberia	450	4	146	95	95001	Accra Peace Agreement	45020030818	Government of Liberia	450	LURD	1360	1	0	2003-08-18	2003-08-18	2008-08-18	3	2003-10-30	104	political power-sharing: Vamba Kanneh (LURD) is named transport minister	LURD (1360)	December 2003, p12	-99
Liberia	450	4	146	95	95001	Accra Peace Agreement	45020030818	Government of Liberia	450	LURD	1360	1	0	2003-08-18	2003-08-18	2008-08-18	3	2003-10-30	104	political power-sharing: Jackson Eddo (LURD) is named minister of state for presidential affairs [alternative spelling Jackson E. Doe]	LURD (1360)	December 2003, p12	-99
Liberia	450	4	146	95	95001	Accra Peace Agreement	45020030818	Government of Liberia	450	LURD	1360	1	0	2003-08-18	2003-08-18	2008-08-18	3	2003-10-30	104	political power-sharing: Lavella Supawood (LURD) is named labour minister	LURD (1360)	December 2003, p12	-99
Liberia	450	4	146	95	95001	Accra Peace Agreement	45020030818	Government of Liberia	450	LURD	1360	1	0	2003-08-18	2003-08-18	2008-08-18	1	2004-08-21	501	proportional representation: a law decree is abolished with introduces propotional representation	-99	December 2004, p13/14	-99
Liberia	450	4	146	95	95001	Accra Peace Agreement	45020030818	Government of Liberia	450	LURD	1360	1	0	2003-08-18	2003-08-18	2008-08-18	1	2005-10-11	504	parliamentary elections: George Weah's Congress for Democratic Change (CDC) won the most seats (15 seats / 23,4%), Liberty Party (LP): (9 seats / 14,1%) [EIU does not give the official date, data entry has been amended]	-99	December 2005, p10-12	-99
Liberia	450	4	146	95	95001	Accra Peace Agreement	45020030818	Government of Liberia	450	LURD	1360	1	0	2003-08-18	2003-08-18	2008-08-18	1	2005-10-11	505	presidential elections (1st round): George Weah (CDC): 28,3%, Ellen Jonson-Sirleaf (UP): 19,8%, Charles Brumskine (LP): 13,9% [EIU does not give the official date, data entry has been amended]	-99	December 2005, p10-12	-99
Liberia	450	4	146	95	95001	Accra Peace Agreement	45020030818	Government of Liberia	450	LURD	1360	1	0	2003-08-18	2003-08-18	2008-08-18	3	2005-10-15	122	political power-sharing (rebel group quota in parliament): parliamentary quotas abolished with legislative elections: George Weah's Congress for Democratic Change (CDC) won the most seats (15 seats / 23,4%), Liberty Party (LP): (9 seats / 14,1%)	LURD (1360)	December 2005, p10-12	-99
Liberia	450	4	146	95	95001	Accra Peace Agreement	45020030818	Government of Liberia	450	LURD	1360	1	0	2003-08-18	2003-08-18	2008-08-18	1	2005-11-08	505	presidential elections (2nd round): Johnson-Sirleaf won the election with 59,4% of the vote, while Mr Weah received 40,6% [EIU does not give the official date, data entry has been amended]	-99	December 2005, p10-12	-99
Liberia	450	4	146	95	95001	Accra Peace Agreement	45020030818	Government of Liberia	450	LURD	1360	1	0	2003-08-18	2003-08-18	2008-08-18	1	2006-01-16	301	economic power-sharing: rebels lose control over parastatals	LURD (1360)	March 2006, p11	-99
Liberia	450	4	146	95	95001	Accra Peace Agreement	45020030818	Government of Liberia	450	LURD	1360	1	0	2003-08-18	2003-08-18	2008-08-18	1	2006-01-16	303	economic power-sharing: rebels lose control over parastatals	LURD (1360)	March 2006, p11	-99
Liberia	450	4	146	95	95001	Accra Peace Agreement	45020030818	Government of Liberia	450	LURD	1360	1	0	2003-08-18	2003-08-18	2008-08-18	4	2006-03-15	100	political power-sharing: NTGL is dissolved	LURD (1360)	September 2003, p11/12 / March 2006, p11	-99
Liberia	450	4	146	95	95001	Accra Peace Agreement	45020030818	Government of Liberia	450	LURD	1360	1	0	2003-08-18	2003-08-18	2008-08-18	4	2006-03-15	103	political power-sharing: Kabineh Ja’neh (LURD) loses post as justice minister	LURD (1360)	September 2003, p11/12 / March 2006, p11	-99
Liberia	450	4	146	95	95001	Accra Peace Agreement	45020030818	Government of Liberia	450	LURD	1360	1	0	2003-08-18	2003-08-18	2008-08-18	4	2006-03-15	103	political power-sharing: Luseni Kamara (LURD) loses post as finance minister	LURD (1360)	September 2003, p11/12 / March 2006, p11	-99
Liberia	450	4	146	95	95001	Accra Peace Agreement	45020030818	Government of Liberia	450	LURD	1360	1	0	2003-08-18	2003-08-18	2008-08-18	4	2006-03-15	105	political power-sharing: Vamba Kanneh (LURD) loses post as transport minister	LURD (1360)	September 2003, p11/12 / March 2006, p11	-99
Liberia	450	4	146	95	95001	Accra Peace Agreement	45020030818	Government of Liberia	450	LURD	1360	1	0	2003-08-18	2003-08-18	2008-08-18	4	2006-03-15	105	political power-sharing: Jackson Eddo (LURD) loses post as minister of state for presidential affairs [alternative spelling Jackson E. Doe]	LURD (1360)	September 2003, p11/12 / March 2006, p11	-99
Liberia	450	4	146	95	95001	Accra Peace Agreement	45020030818	Government of Liberia	450	LURD	1360	1	0	2003-08-18	2003-08-18	2008-08-18	4	2006-03-15	105	political power-sharing: Lavella Supawood (LURD) loses post as labour minister	LURD (1360)	September 2003, p11/12 / March 2006, p11	-99
Liberia	450	4	146	95	95001	Accra Peace Agreement	45020030818	Government of Liberia	450	LURD	1360	1	0	2003-08-18	2003-08-18	2008-08-18	1	2008-08-18	2	end of 5-year period	-99	-99	UCDP
Liberia	450	4	146	352	352001	Accra Peace Agreement	45020030818	Government of Liberia	450	MODEL	1361	1	0	2003-08-18	2003-08-18	2008-08-18	1	2003-08-18	1	PA signature	Government of Liberia (450), LURD (1360), MODEL (1361)	-99	PSED_promises
Liberia	450	4	146	352	352001	Accra Peace Agreement	45020030818	Government of Liberia	450	MODEL	1361	1	0	2003-08-18	2003-08-18	2008-08-18	1	2003-08-19	121	political power-sharing (rebel group quota in parliament): quotas in the national parliament are introduced	MODEL (1361)	September 2003, p13	-99
Liberia	450	4	146	352	352001	Accra Peace Agreement	45020030818	Government of Liberia	450	MODEL	1361	1	0	2003-08-18	2003-08-18	2008-08-18	1	2003-10-15	300	economic power-sharing: rebels take over parastatals ("as well as control of a variety of parastatals and other government agencies")	MODEL (1361)	September 2003, p11/12 / March 2006, p11	-99
Liberia	450	4	146	352	352001	Accra Peace Agreement	45020030818	Government of Liberia	450	MODEL	1361	1	0	2003-08-18	2003-08-18	2008-08-18	1	2003-10-15	302	economic power-sharing: rebels take over parastatals ("as well as control of a variety of parastatals and other government agencies")	MODEL (1361)	September 2003, p11/12 / March 2006, p11	-99
Liberia	450	4	146	352	352001	Accra Peace Agreement	45020030818	Government of Liberia	450	MODEL	1361	1	0	2003-08-18	2003-08-18	2008-08-18	3	2003-10-30	100	political power-sharing: rebel groups LURD and MODEL get posts in the National Transitional Government of Liberia (NTGL)	MODEL (1361)	December 2003, p12	-99
Liberia	450	4	146	352	352001	Accra Peace Agreement	45020030818	Government of Liberia	450	MODEL	1361	1	0	2003-08-18	2003-08-18	2008-08-18	3	2003-10-30	102	political power-sharing: Thomas Nimely (MODEL) is named foreign minister	MODEL (1361)	December 2003, p12	-99
Liberia	450	4	146	352	352001	Accra Peace Agreement	45020030818	Government of Liberia	450	MODEL	1361	1	0	2003-08-18	2003-08-18	2008-08-18	3	2003-10-30	102	political power-sharing: Samuel Wolo (MODEL) is named commerce and industry minister	MODEL (1361)	December 2003, p12	-99
Liberia	450	4	146	352	352001	Accra Peace Agreement	45020030818	Government of Liberia	450	MODEL	1361	1	0	2003-08-18	2003-08-18	2008-08-18	3	2003-10-30	104	political power-sharing: George Kammie (MODEL) is named agriculture minister	MODEL (1361)	December 2003, p12	-99
Liberia	450	4	146	352	352001	Accra Peace Agreement	45020030818	Government of Liberia	450	MODEL	1361	1	0	2003-08-18	2003-08-18	2008-08-18	4	2004-02-17	100	political power-sharing: two more MODEL minister are named	MODEL (1361)	February 2004	-99
Liberia	450	4	146	352	352001	Accra Peace Agreement	45020030818	Government of Liberia	450	MODEL	1361	1	0	2003-08-18	2003-08-18	2008-08-18	4	2004-02-17	102	political power-sharing: Jonathan Mason (MODEL) is named land, mines & energy minister	MODEL (1361)	February 2004	-99
Liberia	450	4	146	352	352001	Accra Peace Agreement	45020030818	Government of Liberia	450	MODEL	1361	1	0	2003-08-18	2003-08-18	2008-08-18	4	2004-02-17	104	political power-sharing: Irwin O. Coleman (MODEL) is named public works minister	MODEL (1361)	February 2004	-99
Liberia	450	4	146	352	352001	Accra Peace Agreement	45020030818	Government of Liberia	450	MODEL	1361	1	0	2003-08-18	2003-08-18	2008-08-18	1	2004-08-21	501	proportional representation: a law decree is abolished with introduces propotional representation	-99	December 2004, p13/14	-99
Liberia	450	4	146	352	352001	Accra Peace Agreement	45020030818	Government of Liberia	450	MODEL	1361	1	0	2003-08-18	2003-08-18	2008-08-18	1	2005-10-11	504	parliamentary elections: George Weah's Congress for Democratic Change (CDC) won the most seats (15 seats / 23,4%), Liberty Party (LP): (9 seats / 14,1%) [EIU does not give the official date, data entry has been amended]	-99	December 2005, p10-12	-99
Liberia	450	4	146	352	352001	Accra Peace Agreement	45020030818	Government of Liberia	450	MODEL	1361	1	0	2003-08-18	2003-08-18	2008-08-18	1	2005-10-11	505	presidential elections (1st round): George Weah (CDC): 28,3%, Ellen Jonson-Sirleaf (UP): 19,8%, Charles Brumskine (LP): 13,9% [EIU does not give the official date, data entry has been amended]	-99	December 2005, p10-12	-99
Liberia	450	4	146	352	352001	Accra Peace Agreement	45020030818	Government of Liberia	450	MODEL	1361	1	0	2003-08-18	2003-08-18	2008-08-18	3	2005-10-15	122	political power-sharing (rebel group quota in parliament): parliamentary quotas abolished with legislative elections: George Weah's Congress for Democratic Change (CDC) won the most seats (15 seats / 23,4%), Liberty Party (LP): (9 seats / 14,1%)	MODEL (1361)	December 2005, p10-12	-99
Liberia	450	4	146	352	352001	Accra Peace Agreement	45020030818	Government of Liberia	450	MODEL	1361	1	0	2003-08-18	2003-08-18	2008-08-18	1	2005-11-08	505	presidential elections (2nd round): Johnson-Sirleaf won the election with 59,4% of the vote, while Mr Weah received 40,6% [EIU does not give the official date, data entry has been amended]	-99	December 2005, p10-12	-99
Liberia	450	4	146	352	352001	Accra Peace Agreement	45020030818	Government of Liberia	450	MODEL	1361	1	0	2003-08-18	2003-08-18	2008-08-18	1	2006-01-16	301	economic power-sharing: rebels lose control over parastatals	MODEL (1361)	March 2006, p11	-99
Liberia	450	4	146	352	352001	Accra Peace Agreement	45020030818	Government of Liberia	450	MODEL	1361	1	0	2003-08-18	2003-08-18	2008-08-18	1	2006-01-16	303	economic power-sharing: rebels lose control over parastatals	MODEL (1361)	March 2006, p11	-99
Liberia	450	4	146	352	352001	Accra Peace Agreement	45020030818	Government of Liberia	450	MODEL	1361	1	0	2003-08-18	2003-08-18	2008-08-18	4	2006-03-15	100	political power-sharing: NTGL is dissolved	MODEL (1361)	September 2003, p11/12 / March 2006, p11	-99
Liberia	450	4	146	352	352001	Accra Peace Agreement	45020030818	Government of Liberia	450	MODEL	1361	1	0	2003-08-18	2003-08-18	2008-08-18	4	2006-03-15	103	political power-sharing: Thomas Nimely (MODEL) loses post foreign minister	MODEL (1361)	September 2003, p11/12 / March 2006, p11	-99
Liberia	450	4	146	352	352001	Accra Peace Agreement	45020030818	Government of Liberia	450	MODEL	1361	1	0	2003-08-18	2003-08-18	2008-08-18	4	2006-03-15	103	political power-sharing: Samuel Wolo (MODEL) loses post as commerce and industry minister	MODEL (1361)	September 2003, p11/12 / March 2006, p11	-99
Liberia	450	4	146	352	352001	Accra Peace Agreement	45020030818	Government of Liberia	450	MODEL	1361	1	0	2003-08-18	2003-08-18	2008-08-18	4	2006-03-15	103	political power-sharing: Jonathan Mason (MODEL) loses post as land, mines & energy minister	MODEL (1361)	September 2003, p11/12 / March 2006, p11	-99
Liberia	450	4	146	352	352001	Accra Peace Agreement	45020030818	Government of Liberia	450	MODEL	1361	1	0	2003-08-18	2003-08-18	2008-08-18	4	2006-03-15	105	political power-sharing: George Kammie (MODEL) loses post as agriculture minister	MODEL (1361)	September 2003, p11/12 / March 2006, p11	-99
Liberia	450	4	146	352	352001	Accra Peace Agreement	45020030818	Government of Liberia	450	MODEL	1361	1	0	2003-08-18	2003-08-18	2008-08-18	4	2006-03-15	105	political power-sharing: Irwin O. Coleman (MODEL) loses post as public works minister	MODEL (1361)	September 2003, p11/12 / March 2006, p11	-99
Liberia	450	4	146	352	352001	Accra Peace Agreement	45020030818	Government of Liberia	450	MODEL	1361	1	0	2003-08-18	2003-08-18	2008-08-18	1	2008-08-18	2	end of 5-year period	-99	-99	UCDP
Sierra Leone	451	4	187	130	130001	Abidjan Peace Agreement	45119961130	Government of Sierra Leone	451	RUF	1384	0	0	1996-11-30	1996-11-30	1997-05-13	1	1996-11-30	1	PA signature	Government of Sierra Leone (451), RUF (1384)	-99	PSED_promises
Sierra Leone	451	4	187	130	130001	Abidjan Peace Agreement	45119961130	Government of Sierra Leone	451	RUF	1384	0	0	1996-11-30	1996-11-30	1997-05-13	1	1997-05-13	3	civil conflict recurrence	Government of Sierra Leone (451), RUF (1384)	-99	UCDP GED
Sierra Leone	451	4	187	130	130002	Lomé Peace Agreement	45119990707	Government of Sierra Leone	451	RUF	1384	0	1	1999-07-07	1999-07-07	2000-05-26	1	1999-07-07	1	PA signature	Government of Sierra Leone (451), RUF (1384)	-99	PSED_promises
Sierra Leone	451	4	187	130	130002	Lomé Peace Agreement	45119990707	Government of Sierra Leone	451	RUF	1384	0	1	1999-07-07	1999-07-07	2000-05-26	3	1999-10-15	100	political power-sharing: Mike Lamin (RUFP) as trade and industry minister, Alimamy Pallo Bangura (RUFP) as energy and works minister, Peter Vandy (RUFP) as country planning and environment minister	RUF (1384)	1st quarter 2000, pg 27	-99
Sierra Leone	451	4	187	130	130002	Lomé Peace Agreement	45119990707	Government of Sierra Leone	451	RUF	1384	0	1	1999-07-07	1999-07-07	2000-05-26	3	1999-10-15	104	political power-sharing: Mike Lamin (RUFP) as trade and industry minister	RUF (1384)	1st quarter 2000, pg 27	-99
Sierra Leone	451	4	187	130	130002	Lomé Peace Agreement	45119990707	Government of Sierra Leone	451	RUF	1384	0	1	1999-07-07	1999-07-07	2000-05-26	3	1999-10-15	104	political power-sharing: Alimamy Pallo Bangura (RUFP) as energy and works minister	RUF (1384)	1st quarter 2000, pg 27	-99
Sierra Leone	451	4	187	130	130002	Lomé Peace Agreement	45119990707	Government of Sierra Leone	451	RUF	1384	0	1	1999-07-07	1999-07-07	2000-05-26	3	1999-10-15	104	political power-sharing: Peter Vandy (RUFP) as country planning and environment minister	RUF (1384)	1st quarter 2000, pg 27	-99
Sierra Leone	451	4	187	130	130002	Lomé Peace Agreement	45119990707	Government of Sierra Leone	451	RUF	1384	0	1	1999-07-07	1999-07-07	2000-05-26	3	1999-10-15	302	economic power-sharing: Foday Sankoh (RUF) was appointed president of the Commission for Strategic Resources, National Reconstruction and Development	RUF (1384)	-99	follow-up search in Africa Research Bulletin, 2000 37-2, 13879
Sierra Leone	451	4	187	130	130002	Lomé Peace Agreement	45119990707	Government of Sierra Leone	451	RUF	1384	0	1	1999-07-07	1999-07-07	2000-05-26	1	2000-03-22	267	military integration: military integration process defined	RUF (1384)	2nd quarter 2000, pg 34	-99
Sierra Leone	451	4	187	130	130002	Lomé Peace Agreement	45119990707	Government of Sierra Leone	451	RUF	1384	0	1	1999-07-07	1999-07-07	2000-05-26	1	2000-05-26	3	civil conflict recurrence	Government of Sierra Leone (451), RUF (1384)	-99	UCDP Encyclopedia, UCDP GED
Sierra Leone	451	4	187	130	130003	Abuja Ceasefire Agreement	45120001110	Government of Sierra Leone	451	RUF	1384	0	1	2000-11-10	2000-11-10	2005-11-10	1	2000-11-10	1	PA signature	Government of Sierra Leone (451), RUF (1384)	-99	PSED_promises
Sierra Leone	451	4	187	130	130003	Abuja Ceasefire Agreement	45120001110	Government of Sierra Leone	451	RUF	1384	0	1	2000-11-10	2000-11-10	2005-11-10	2	2001-12-17	267	military integration	RUF (1384)	-99	Africa News, 24 December 2001
Sierra Leone	451	4	187	130	130003	Abuja Ceasefire Agreement	45120001110	Government of Sierra Leone	451	RUF	1384	0	1	2000-11-10	2000-11-10	2005-11-10	3	2002-01-15	500	proportional representation: law introduced	-99	2nd quarter 2002, pg 34	-99
Sierra Leone	451	4	187	130	130003	Abuja Ceasefire Agreement	45120001110	Government of Sierra Leone	451	RUF	1384	0	1	2000-11-10	2000-11-10	2005-11-10	1	2002-05-14	504	parliamentary elections: for results see raw data	-99	2nd quarter 2002, pg 31	-99
Sierra Leone	451	4	187	130	130003	Abuja Ceasefire Agreement	45120001110	Government of Sierra Leone	451	RUF	1384	0	1	2000-11-10	2000-11-10	2005-11-10	1	2002-05-14	505	presidential elections: Ahmad Tejad Kabbah reelected	-99	2nd quarter 2002, pg 31	-99
Sierra Leone	451	4	187	130	130003	Abuja Ceasefire Agreement	45120001110	Government of Sierra Leone	451	RUF	1384	0	1	2000-11-10	2000-11-10	2005-11-10	1	2002-08-16	267	military integration	RUF (1384)	-99	Africa News, 23 August 2002
Sierra Leone	451	4	187	130	130003	Abuja Ceasefire Agreement	45120001110	Government of Sierra Leone	451	RUF	1384	0	1	2000-11-10	2000-11-10	2005-11-10	1	2005-11-10	2	end of 5-year period	-99	-99	UCDP
Chad	483	4	91	24	24001	El Geneina Agreement	48319921031	Government of Chad	483	FNT	1296	0	0	1992-10-31	1992-10-31	1993-12-31	1	1992-10-31	1	PA signature	Government of Chad (483), FNT (1296)	-99	PSED_promises
Chad	483	4	91	24	24001	El Geneina Agreement	48319921031	Government of Chad	483	FNT	1296	0	0	1992-10-31	1992-10-31	1993-12-31	1	1993-04-07	507	constitution: Sovereign national conference approves "transition charter" regulating game of institutions for interim period of one year	-99	2nd quarter, 1993	-99
Chad	483	4	91	24	24001	El Geneina Agreement	48319921031	Government of Chad	483	FNT	1296	0	0	1992-10-31	1992-10-31	1993-12-31	4	1993-12-31	3	civil conflict recurrence	Government of Chad (483), FNT (1296)	-99	UCDP Encyclopedia
Chad	483	4	91	22	22001	Tripoli-1 Agreement	48319931016	Government of Chad	483	CNR	1293	0	0	1993-10-16	1993-10-16	1993-10-22	1	1993-10-16	1	PA signature	Government of Chad (483), CNR (1293)	-99	PSED_promises
Chad	483	4	91	22	22001	Tripoli-1 Agreement	48319931016	Government of Chad	483	CNR	1293	0	0	1993-10-16	1993-10-16	1993-10-22	1	1993-10-22	3	civil conflict recurrence	Government of Chad (483), CNR (1293)	-99	UCDP Encyclopedia
Chad	483	4	91	21	21001	Bangui-2-Agreement	48319940811	Government of Chad	483	CSNPD	1294	0	0	1994-08-11	1994-08-11	1999-08-11	1	1994-08-11	1	PA signature	Government of Chad (483), CSNPD (1294)	-99	PSED_promises
Chad	483	4	91	21	21001	Bangui-2-Agreement	48319940811	Government of Chad	483	CSNPD	1294	0	0	1994-08-11	1994-08-11	1999-08-11	1	1994-11-01	267	military integration: around 1500 rank-and-file CSNPD fighters are admitted to military training of chadian national army	CSNPD (1294)	1st quarter 1995	-99
Chad	483	4	91	21	21001	Bangui-2-Agreement	48319940811	Government of Chad	483	CSNPD	1294	0	0	1994-08-11	1994-08-11	1999-08-11	1	1994-11-01	200	military power-sharing: CSNPD leader Ketté promoted to rank of colonel, 5 others promoted to rank of lieutenant-colonel; together with 130 other officers integrated into chadian national army	CSNPD (1294)	1st quarter 1995	-99
Chad	483	4	91	21	21001	Bangui-2-Agreement	48319940811	Government of Chad	483	CSNPD	1294	0	0	1994-08-11	1994-08-11	1999-08-11	3	1994-12-15	100	political power-sharing: Eloi Bahou Malloum (CSNPD) is announced minister of mines, energy and oil	CSNPD (1294)	1st quarter 1995	-99
Chad	483	4	91	21	21001	Bangui-2-Agreement	48319940811	Government of Chad	483	CSNPD	1294	0	0	1994-08-11	1994-08-11	1999-08-11	3	1994-12-15	102	political power-sharing: Eloi Bahou Malloum (CSNPD) is announced minister of mines, energy and oil	CSNPD (1294)	1st quarter 1995	-99
Chad	483	4	91	21	21001	Bangui-2-Agreement	48319940811	Government of Chad	483	CSNPD	1294	0	0	1994-08-11	1994-08-11	1999-08-11	1	1995-04-16	100	political power-sharing: Moise Kette (CSNPD) becomes minister of tourism and environment	CSNPD (1294)	2nd quarter 1995	-99
Chad	483	4	91	21	21001	Bangui-2-Agreement	48319940811	Government of Chad	483	CSNPD	1294	0	0	1994-08-11	1994-08-11	1999-08-11	1	1995-04-16	103	political power-sharing: Eloi Bahou Malloum (CSNPD) loses his position as minister of mines, energy and oil due to the cabinet reshuffle	CSNPD (1294)	2nd quarter 1995	-99
Chad	483	4	91	21	21001	Bangui-2-Agreement	48319940811	Government of Chad	483	CSNPD	1294	0	0	1994-08-11	1994-08-11	1999-08-11	1	1995-04-16	104	political power-sharing: Moise Kette (CSNPD) becomes minister of tourism and environment	CSNPD (1294)	2nd quarter 1995	-99
Chad	483	4	91	21	21001	Bangui-2-Agreement	48319940811	Government of Chad	483	CSNPD	1294	0	0	1994-08-11	1994-08-11	1999-08-11	1	1995-04-16	201	military power-sharing: Moise Kette (CSNPD) becomes minister of tourism and environment and is not coded as being in army command anymore	CSNPD (1294)	2nd quarter 1995	-99
Chad	483	4	91	21	21001	Bangui-2-Agreement	48319940811	Government of Chad	483	CSNPD	1294	0	0	1994-08-11	1994-08-11	1999-08-11	1	1996-03-31	506	referendum: referendum concerning approval of new constitution is taking place	-99	2nd quarter 1996	-99
Chad	483	4	91	21	21001	Bangui-2-Agreement	48319940811	Government of Chad	483	CSNPD	1294	0	0	1994-08-11	1994-08-11	1999-08-11	1	1996-04-14	507	constitution: referendum results about new constitution are positive with almost two third of the votes	-99	2nd quarter 1996	-99
Chad	483	4	91	21	21001	Bangui-2-Agreement	48319940811	Government of Chad	483	CSNPD	1294	0	0	1994-08-11	1994-08-11	1999-08-11	1	1996-04-19	100	political power-sharing: Lieutenant Ketté is dismissed from government	CSNPD (1294)	2nd quarter 1996	-99
Chad	483	4	91	21	21001	Bangui-2-Agreement	48319940811	Government of Chad	483	CSNPD	1294	0	0	1994-08-11	1994-08-11	1999-08-11	1	1996-04-19	105	political power-sharing: Lieutenant Ketté is dismissed from government	CSNPD (1294)	2nd quarter 1996	-99
Chad	483	4	91	21	21001	Bangui-2-Agreement	48319940811	Government of Chad	483	CSNPD	1294	0	0	1994-08-11	1994-08-11	1999-08-11	1	1996-06-02	505	presidential elections (1st round)		3rd quarter 1996	-99
Chad	483	4	91	21	21001	Bangui-2-Agreement	48319940811	Government of Chad	483	CSNPD	1294	0	0	1994-08-11	1994-08-11	1999-08-11	1	1996-07-03	505	presidential elections (2nd round): in second round of national elections Idriss Déby takes the win		3rd quarter 1996	-99
Chad	483	4	91	21	21001	Bangui-2-Agreement	48319940811	Government of Chad	483	CSNPD	1294	0	0	1994-08-11	1994-08-11	1999-08-11	1	1997-01-04	504	parliamentary elections (1st round)		2nd quarter 1997	-99
Chad	483	4	91	21	21001	Bangui-2-Agreement	48319940811	Government of Chad	483	CSNPD	1294	0	0	1994-08-11	1994-08-11	1999-08-11	1	1997-02-23	504	parliamentary elections (2nd round)		2nd quarter 1997	-99
Chad	483	4	91	21	21001	Bangui-2-Agreement	48319940811	Government of Chad	483	CSNPD	1294	0	0	1994-08-11	1994-08-11	1999-08-11	1	1999-08-11	2	end of 5-year period	-99	-99	UCDP
Chad	483	4	91	24	24002	Abeche Agreement	48319941012	Government of Chad	483	FNT	1296	0	1	1994-10-12	1994-10-12	1999-10-12	1	1994-10-12	1	PA signature	Government of Chad (483), FNT (1296)	-99	PSED_promises
Chad	483	4	91	24	24002	Abeche Agreement	48319941012	Government of Chad	483	FNT	1296	0	1	1994-10-12	1994-10-12	1999-10-12	1	1996-03-31	506	referendum: referendum concerning approval of new constitution is taking place	-99	2nd quarter 1996	-99
Chad	483	4	91	24	24002	Abeche Agreement	48319941012	Government of Chad	483	FNT	1296	0	1	1994-10-12	1994-10-12	1999-10-12	1	1996-04-14	507	constitution: referendum results about new constitution are positive with almost two third of the votes	-99	2nd quarter 1996	-99
Chad	483	4	91	24	24002	Abeche Agreement	48319941012	Government of Chad	483	FNT	1296	0	1	1994-10-12	1994-10-12	1999-10-12	1	1996-06-02	505	presidential elections (1st round)	-99	3rd quarter 1996	-99
Chad	483	4	91	24	24002	Abeche Agreement	48319941012	Government of Chad	483	FNT	1296	0	1	1994-10-12	1994-10-12	1999-10-12	1	1996-07-03	505	presidential elections (2nd round): in second round of national elections Idriss Déby takes the win	-99	3rd quarter 1996	-99
Chad	483	4	91	24	24002	Abeche Agreement	48319941012	Government of Chad	483	FNT	1296	0	1	1994-10-12	1994-10-12	1999-10-12	1	1997-01-04	504	parliamentary elections (1st round)	-99	2nd quarter 1997	-99
Chad	483	4	91	24	24002	Abeche Agreement	48319940811	Government of Chad	483	FNT	1296	0	1	1994-10-12	1994-10-12	1999-10-12	1	1997-02-23	504	parliamentary elections (2nd round)	-99	2nd quarter 1997	-99
Chad	483	4	91	24	24002	Abeche Agreement	48319941012	Government of Chad	483	FNT	1296	0	1	1994-10-12	1994-10-12	1999-10-12	1	1997-10-08	508	subsequent peace agreement: New peace agreement with several groups, including FNT	Government of Chad (483), FNT (1296)	4th quarter 1997	-99
Chad	483	4	91	24	24002	Abeche Agreement	48319941012	Government of Chad	483	FNT	1296	0	1	1994-10-12	1994-10-12	1999-10-12	1	1999-10-12	2	end of 5-year period	-99	-99	UCDP
Chad	483	4	91	25	25001	Dougia Accord	48319940811	Government of Chad	483	MDD	1292	0	0	1993-02-28	1995-11-22	1997-12-15	1	1995-11-22	1	PA signature	Government of Chad (483), MDD (1292)	-99	PSED_promises
Chad	483	4	91	25	25001	Dougia Accord	48319951122	Government of Chad	483	MDD	1292	0	0	1993-02-28	1995-11-22	1997-12-15	1	1996-01-02	267	military integration: MDD faction having signed the Dougia Accord is integrated into national army of Chad	MDD (1292)	-99	BBC Summary of World Broadcasts, 03.01.1996
Chad	483	4	91	25	25001	Dougia Accord	48319951122	Government of Chad	483	MDD	1292	0	0	1993-02-28	1995-11-22	1997-12-15	1	1996-03-31	506	referendum: referendum concerning approval of new constitution is taking place	-99	2nd quarter 1996	-99
Chad	483	4	91	25	25001	Dougia Accord	48319951122	Government of Chad	483	MDD	1292	0	0	1993-02-28	1995-11-22	1997-12-15	1	1996-04-14	507	constitution: referendum results about new constitution are positive with almost two third of the votes	-99	2nd quarter 1996	-99
Chad	483	4	91	25	25001	Dougia Accord	48319951122	Government of Chad	483	MDD	1292	0	0	1993-02-28	1995-11-22	1997-12-15	1	1996-06-02	505	presidential elections (1st round)	-99	3rd quarter 1996	-99
Chad	483	4	91	25	25001	Dougia Accord	48319951122	Government of Chad	483	MDD	1292	0	0	1993-02-28	1995-11-22	1997-12-15	1	1996-07-03	505	presidential elections (2nd round): in second round of national elections Idriss Déby takes the win	-99	3rd quarter 1996	-99
Chad	483	4	91	25	25001	Dougia Accord	48319951122	Government of Chad	483	MDD	1292	0	0	1993-02-28	1995-11-22	1997-12-15	1	1997-01-04	504	parliamentary elections (1st round)	-99	2nd quarter 1997	-99
Chad	483	4	91	25	25001	Dougia Accord	48319940811	Government of Chad	483	MDD	1292	0	0	1993-02-28	1995-11-22	1997-12-15	1	1997-02-23	504	parliamentary elections (2nd round)	-99	2nd quarter 1997	-99
Chad	483	4	91	25	25001	Dougia Accord	48319940811	Government of Chad	483	MDD	1292	0	0	1993-02-28	1995-11-22	1997-12-15	1	1997-12-15	3	civil conflict recurrence	Government of Chad (483), MDD (1292)	-99	UCDP GED
Chad	483	4	91	26	26001	Donya Agreement	48319980507	Government of Chad	483	FARF	1297	0	0	1998-05-07	1998-05-07	2003-05-07	1	1998-05-07	1	PA signature	Government of Chad (483), FARF (1297)	-99	PSED_promises
Chad	483	4	91	26	26001	Donya Agreement	48319980507	Government of Chad	483	FARF	1297	0	0	1998-05-07	1998-05-07	2003-05-07	4	1998-10-01	267	military integration: FARF combatants are reintegrated into national army	FARF (1297)	4th quarter 1998	-99
Chad	483	4	91	26	26001	Donya Agreement	48319980507	Government of Chad	483	FARF	1297	0	0	1998-05-07	1998-05-07	2003-05-07	1	2001-05-20	505	presidential elections: Idriss Déby wins national presidential elections with landslide victory	-99	August, 2001	-99
Chad	483	4	91	26	26001	Donya Agreement	48319980507	Government of Chad	483	FARF	1297	0	0	1998-05-07	1998-05-07	2003-05-07	1	2002-04-21	504	parliamentary elections: for results see raw data	-99	May 2002	-99
Chad	483	4	91	26	26001	Donya Agreement	48319980507	Government of Chad	483	FARF	1297	0	0	1998-05-07	1998-05-07	2003-05-07	1	2003-05-07	2	end of 5-year period	-99	-99	UCDP
Chad	483	4	91	25	25002	Reconciliation Agreement	48319990703	Government of Chad	483	MDD	1292	0	1	1997-12-31	1999-07-03	2004-07-03	1	1999-07-03	1	PA signature	Government of Chad (483), MDD (1292)	-99	PSED_promises
Chad	483	4	91	25	25002	Reconciliation Agreement	48319990703	Government of Chad	483	MDD	1292	0	1	1997-12-31	1999-07-03	2004-07-03	1	2001-05-20	505	presidential elections: Idriss Déby wins national presidential elections with landslide victory	-99	August, 2001	-99
Chad	483	4	91	25	25002	Reconciliation Agreement	48319990703	Government of Chad	483	MDD	1292	0	1	1997-12-31	1999-07-03	2004-07-03	1	2002-04-21	504	parliamentary elections: for results see raw data	-99	May 2002	-99
Chad	483	4	91	25	25002	Reconciliation Agreement	48319990703	Government of Chad	483	MDD	1292	0	1	1997-12-31	1999-07-03	2004-07-03	1	2004-07-03	2	end of 5-year period	-99	-99	UCDP
Chad	483	4	91	27	27001	Tripoli-2 Agreement	48320020107	Government of Chad	483	MDJT	1298	0	0	2002-01-07	2002-01-07	2002-05-27	1	2002-01-07	1	PA signature	Government of Chad (483), MDJT (1298)	-99	PSED_promises
Chad	483	4	91	27	27001	Tripoli-2 Agreement	48320020107	Government of Chad	483	MDJT	1298	0	0	2002-01-07	2002-01-07	2002-05-27	1	2002-04-21	504	parliamentary elections: elections have taken place with small turnout while the MPS is taking the biggest share of the seats	-99	May 2002	-99
Chad	483	4	91	27	27001	Tripoli-2 Agreement	48320020107	Government of Chad	483	MDJT	1298	0	0	2002-01-07	2002-01-07	2002-05-27	1	2002-05-27	3	civil conflict recurrence	Government of Chad (483), MDJT (1298)	-99	UCDP Encyclopedia
Chad	483	4	91	27	27002	Yebibou Agreement	48320050818	Government of Chad	483	MDJT	1298	0	1	2002-12-31	2005-08-18	2010-08-18	1	2005-08-18	1	PA signature	Government of Chad (483), MDJT (1298)	-99	PSED_promises
Chad	483	4	91	27	27002	Yebibou Agreement	48320050818	Government of Chad	483	MDJT	1298	0	1	2002-12-31	2005-08-18	2010-08-18	1	2006-05-03	505	presidential elections: President Déby Itno reelected President of Chad	-99	June 2006	-99
Chad	483	4	91	27	27002	Yebibou Agreement	48320050818	Government of Chad	483	MDJT	1298	0	1	2002-12-31	2005-08-18	2010-08-18	3	2010-04-15	508	subsequent peace agreement: peace agreement is signed between MDJT, Dazi faction, and government [JMP: MDJT (Dazi faction) led by Choua Dazi, who had fragmented from MDJT signing PA in 2005]	Government of Chad (483), MDJT (1298)	December 2010	-99
Chad	483	4	91	27	27002	Yebibou Agreement	48320050818	Government of Chad	483	MDJT	1298	0	1	2002-12-31	2005-08-18	2010-08-18	1	2010-08-18	2	end of 5-year period	-99	-99	UCDP
Chad	483	4	91	455	455001	Tripoli Accord	48320061224	Government of Chad	483	FUCD	1299	0	0	2006-12-24	2006-12-24	2011-12-24	1	2006-12-24	1	PA signature	Government of Chad (483), FUCD (1299)	-99	PSED_promises
Chad	483	4	91	455	455001	Tripoli Accord	48320061224	Government of Chad	483	FUCD	1299	0	0	2006-12-24	2006-12-24	2011-12-24	1	2007-03-04	100	political power-sharing: Mahamat Nour (FUCD) becomes minister of defence; two more FUCD members become secretaries of state (below ministerial level)	FUCD (1299)	June 2007	-99
Chad	483	4	91	455	455001	Tripoli Accord	48320061224	Government of Chad	483	FUCD	1299	0	0	2006-12-24	2006-12-24	2011-12-24	1	2007-03-04	102	political power-sharing: Mahamat Nour (FUCD) becomes minister of defence; two more FUCD members become secretaries of state (below ministerial level)	FUCD (1299)	June 2007	-99
Chad	483	4	91	455	455001	Tripoli Accord	48320061224	Government of Chad	483	FUCD	1299	0	0	2006-12-24	2006-12-24	2011-12-24	4	2007-06-15	267	military integration: Report about Unicef demobilisation accord claims that part of FUC have been incorparated into the Chadian National Army	FUCD (1299)	June 2007	-99
Chad	483	4	91	455	455001	Tripoli Accord	48320061224	Government of Chad	483	FUCD	1299	0	0	2006-12-24	2006-12-24	2011-12-24	1	2007-12-01	100	political power-sharing: Mahamat Nour (FUCD) loses ministry of defence	FUCD (1299)	March 2008	-99
Chad	483	4	91	455	455001	Tripoli Accord	48320061224	Government of Chad	483	FUCD	1299	0	0	2006-12-24	2006-12-24	2011-12-24	1	2007-12-01	103	political power-sharing: Mahamat Nour (FUCD) loses ministry of defence	FUCD (1299)	March 2008	-99
Chad	483	4	91	455	455001	Tripoli Accord	48320061224	Government of Chad	483	FUCD	1299	0	0	2006-12-24	2006-12-24	2011-12-24	1	2011-02-13	504	parliamentary elections: 40% turnout; MPS: winning party; other contending parties	-99	March 2011	-99
Chad	483	4	91	455	455001	Tripoli Accord	48320061224	Government of Chad	483	FUCD	1299	0	0	2006-12-24	2006-12-24	2011-12-24	1	2011-04-25	505	presidential elections: Idriss Déby Itno: longtime president, winner of the election (89%); Chadian electorate: 64% turnout	-99	June 2011	-99
Chad	483	4	91	455	455001	Tripoli Accord	48320061224	Government of Chad	483	FUCD	1299	0	0	2006-12-24	2006-12-24	2011-12-24	1	2011-12-24	2	end of 5-year period	-99	-99	UCDP
Congo (Brazzaville)	484	4	214	36	36001	Agreement on Ending Hostilities in the Republic of Congo	48419991229	Government of Congo (Brazzaville)	484	Ninjas	1399	1	0	1999-12-29	1999-12-29	2002-06-14	1	1999-12-29	1	PA signature	Government of Congo (Brazzaville) (484), Ninjas (1399), Cocoyes (1400), Ntsiloulous (1401)	-99	PSED_promises
Congo (Brazzaville)	484	4	214	36	36001	Agreement on Ending Hostilities in the Republic of Congo	48419991229	Government of Congo (Brazzaville)	484	Ninjas	1399	1	0	1999-12-29	1999-12-29	2004-12-29	4	2000-04-01	267	military integration: joint military units have been established in some areas	Ninjas (1399)	2nd quarter 2000	-99
Congo (Brazzaville)	484	4	214	36	36001	Agreement on Ending Hostilities in the Republic of Congo	48419991229	Government of Congo (Brazzaville)	484	Ninjas	1399	1	0	1999-12-29	1999-12-29	2004-12-29	1	2000-12-01	267	military integration: following up committee of pa claims that joint units have been deployed in former rebel zones	Ninjas (1399)	January 2001	-99
Congo (Brazzaville)	484	4	214	36	36001	Agreement on Ending Hostilities in the Republic of Congo	48419991229	Government of Congo (Brazzaville)	484	Ninjas	1399	1	0	1999-12-29	1999-12-29	2004-12-29	4	2001-07-15	267	military integration: 4000 men have been integrated into government forces so far; around two thirds of them pro-government cobra, others from other militias	Ninjas (1399)	October 2001	-99
Congo (Brazzaville)	484	4	214	36	36001	Agreement on Ending Hostilities in the Republic of Congo	48419991229	Government of Congo (Brazzaville)	484	Ninjas	1399	1	0	1999-12-29	1999-12-29	2004-12-29	1	2002-01-20	506	referendum: referendum concerning new constitution is done /// Congolese electorate: turnout 78%, 88% in favour	-99	April, 2002	-99
Congo (Brazzaville)	484	4	214	36	36001	Agreement on Ending Hostilities in the Republic of Congo	48419991229	Government of Congo (Brazzaville)	484	Ninjas	1399	1	0	1999-12-29	1999-12-29	2004-12-29	1	2002-01-20	507	constitution: new constitution is approved by Congoles people (Congolese electorate: turnout 78%, 88% in favour)	-99	April, 2002	-99
Congo (Brazzaville)	484	4	214	36	36001	Agreement on Ending Hostilities in the Republic of Congo	48419991229	Government of Congo (Brazzaville)	484	Ninjas	1399	1	0	1999-12-29	1999-12-29	2004-12-29	1	2002-03-10	505	presidential elections: Sassou-Nguesso winning by landslide (no second round)	-99	April, 2002	-99
Congo (Brazzaville)	484	4	214	36	36001	Agreement on Ending Hostilities in the Republic of Congo	48419991229	Government of Congo (Brazzaville)	484	Ninjas	1399	1	0	1999-12-29	1999-12-29	2004-12-29	1	2002-05-26	504	parliamentary elections (1st round)	-99	July 2002	-99
Congo (Brazzaville)	484	4	214	36	36001	Agreement on Ending Hostilities in the Republic of Congo	48419991229	Government of Congo (Brazzaville)	484	Ninjas	1399	1	0	1999-12-29	1999-12-29	2004-12-29	1	2002-06-30	504	parliamentary elections (2nd round): presidential coalition takes big win	-99	July 2002	-99
Congo (Brazzaville)	484	4	214	36	36001	Agreement on Ending Hostilities in the Republic of Congo	48419991229	Government of Congo (Brazzaville)	484	Ninjas	1399	1	0	1999-12-29	1999-12-29	2004-12-29	1	2004-12-29	2	end of 5-year period	-99	-99	UCDP
Congo (Brazzaville)	484	4	214	37	37001	Agreement on Ending Hostilities in the Republic of Congo	48419991229	Government of Congo (Brazzaville)	484	Cocoyes	1400	1	0	1999-12-29	1999-12-29	2002-06-14	1	1999-12-29	1	PA signature	Government of Congo (Brazzaville) (484), Ninjas (1399), Cocoyes (1400), Ntsiloulous (1401)	-99	PSED_promises
Congo (Brazzaville)	484	4	214	37	37001	Agreement on Ending Hostilities in the Republic of Congo	48419991229	Government of Congo (Brazzaville)	484	Cocoyes	1400	1	0	1999-12-29	1999-12-29	2004-12-29	4	2000-04-01	267	military integration: joint military units have been established in some areas	Cocoyes (1400)	2nd quarter 2000	-99
Congo (Brazzaville)	484	4	214	37	37001	Agreement on Ending Hostilities in the Republic of Congo	48419991229	Government of Congo (Brazzaville)	484	Cocoyes	1400	1	0	1999-12-29	1999-12-29	2004-12-29	1	2000-12-01	267	military integration: following up committee of pa claims that joint units have been deployed in former rebel zones	Cocoyes (1400)	January 2001	-99
Congo (Brazzaville)	484	4	214	37	37001	Agreement on Ending Hostilities in the Republic of Congo	48419991229	Government of Congo (Brazzaville)	484	Cocoyes	1400	1	0	1999-12-29	1999-12-29	2004-12-29	4	2001-07-15	267	military integration: 4000 men have been integrated into government forces so far; around two thirds of them pro-government cobra, others from other militias	Cocoyes (1400)	October 2001	-99
Congo (Brazzaville)	484	4	214	37	37001	Agreement on Ending Hostilities in the Republic of Congo	48419991229	Government of Congo (Brazzaville)	484	Cocoyes	1400	1	0	1999-12-29	1999-12-29	2004-12-29	1	2002-01-20	506	referendum: referendum concerning new constitution is done /// Congolese electorate: turnout 78%, 88% in favour	-99	April, 2002	-99
Congo (Brazzaville)	484	4	214	37	37001	Agreement on Ending Hostilities in the Republic of Congo	48419991229	Government of Congo (Brazzaville)	484	Cocoyes	1400	1	0	1999-12-29	1999-12-29	2004-12-29	1	2002-01-20	507	constitution: new constitution is approved by Congoles people (Congolese electorate: turnout 78%, 88% in favour)	-99	April, 2002	-99
Congo (Brazzaville)	484	4	214	37	37001	Agreement on Ending Hostilities in the Republic of Congo	48419991229	Government of Congo (Brazzaville)	484	Cocoyes	1400	1	0	1999-12-29	1999-12-29	2004-12-29	1	2002-03-10	505	presidential elections: Sassou-Nguesso winning by landslide (no second round)	-99	April, 2002	-99
Congo (Brazzaville)	484	4	214	37	37001	Agreement on Ending Hostilities in the Republic of Congo	48419991229	Government of Congo (Brazzaville)	484	Cocoyes	1400	1	0	1999-12-29	1999-12-29	2004-12-29	1	2002-05-26	504	parliamentary elections (1st round)	-99	July 2002	-99
Congo (Brazzaville)	484	4	214	37	37001	Agreement on Ending Hostilities in the Republic of Congo	48419991229	Government of Congo (Brazzaville)	484	Cocoyes	1400	1	0	1999-12-29	1999-12-29	2004-12-29	1	2002-06-30	504	parliamentary elections (2nd round): presidential coalition takes big win	-99	July 2002	-99
Congo (Brazzaville)	484	4	214	37	37001	Agreement on Ending Hostilities in the Republic of Congo	48419991229	Government of Congo (Brazzaville)	484	Cocoyes	1400	1	0	1999-12-29	1999-12-29	2004-12-29	1	2004-12-29	2	end of 5-year period	-99	-99	UCDP
Congo (Brazzaville)	484	4	214	38	38001	Agreement on Ending Hostilities in the Republic of Congo	48419991229	Government of Congo (Brazzaville)	484	Ntsiloulous	1401	1	0	1999-12-29	1999-12-29	2002-06-14	1	1999-12-29	1	PA signature	Government of Congo (Brazzaville) (484), Ninjas (1399), Cocoyes (1400), Ntsiloulous (1401)	-99	PSED_promises
Congo (Brazzaville)	484	4	214	38	38001	Agreement on Ending Hostilities in the Republic of Congo	48419991229	Government of Congo (Brazzaville)	484	Ntsiloulous	1401	1	0	1999-12-29	1999-12-29	2002-06-14	4	2000-04-01	267	military integration: joint military units have been established in some areas	Ntsiloulous (1401)	2nd quarter 2000	-99
Congo (Brazzaville)	484	4	214	38	38001	Agreement on Ending Hostilities in the Republic of Congo	48419991229	Government of Congo (Brazzaville)	484	Ntsiloulous	1401	1	0	1999-12-29	1999-12-29	2002-06-14	1	2000-12-01	267	military integration: following up committee of pa claims that joint units have been deployed in former rebel zones	Ntsiloulous (1401)	January 2001	-99
Congo (Brazzaville)	484	4	214	38	38001	Agreement on Ending Hostilities in the Republic of Congo	48419991229	Government of Congo (Brazzaville)	484	Ntsiloulous	1401	1	0	1999-12-29	1999-12-29	2002-06-14	1	2002-01-20	506	referendum: referendum concerning new constitution is done /// Congolese electorate: turnout 78%, 88% in favour	-99	April, 2002	-99
Congo (Brazzaville)	484	4	214	38	38001	Agreement on Ending Hostilities in the Republic of Congo	48419991229	Government of Congo (Brazzaville)	484	Ntsiloulous	1401	1	0	1999-12-29	1999-12-29	2002-06-14	1	2002-01-20	507	constitution: new constitution is approved by Congoles people (Congolese electorate: turnout 78%, 88% in favour)	-99	April, 2002	-99
Congo (Brazzaville)	484	4	214	38	38001	Agreement on Ending Hostilities in the Republic of Congo	48419991229	Government of Congo (Brazzaville)	484	Ntsiloulous	1401	1	0	1999-12-29	1999-12-29	2002-06-14	1	2002-03-10	505	presidential elections: Sassou-Nguesso winning by landslide (no second round)	-99	April, 2002	-99
Congo (Brazzaville)	484	4	214	38	38001	Agreement on Ending Hostilities in the Republic of Congo	48419991229	Government of Congo (Brazzaville)	484	Ntsiloulous	1401	1	0	1999-12-29	1999-12-29	2002-06-14	1	2002-05-26	504	parliamentary elections (1st round)	-99	July 2002	-99
Congo (Brazzaville)	484	4	214	38	38001	Agreement on Ending Hostilities in the Republic of Congo	48419991229	Government of Congo (Brazzaville)	484	Ntsiloulous	1401	1	0	1999-12-29	1999-12-29	2002-06-14	1	2002-06-14	3	civil conflict recurrence	Government of Congo (Brazzaville), Ntsiloulous (1401)	-99	UCDP Dyadic Dataset, UCDP Termination
Democratic Republic of Congo (Kinshasa)	490	4	86	40	40001	Lusaka Accord	49019990710	Government of Democratic Republic of Congo (Kinshasa)	490	RCD	1270	1	0	1999-07-10	1999-07-10	1999-08-06	1	1999-07-10	1	PA signature	Government of Democratic Republic of Congo (Kinshasa) (490), RCD (1270), MLC (1269), RCD-ML (1271)	-99	PSED_promises
Democratic Republic of Congo (Kinshasa)	490	4	86	40	40001	Lusaka Accord	49019990710	Government of Democratic Republic of Congo (Kinshasa)	490	RCD	1270	1	0	1999-07-10	1999-07-10	1999-12-31	4	1999-12-31	3	civil conflict recurrence	Government of Democratic Republic of Congo (Kinshasa) (490), RCD (1270)	-99	UCDP Encyclopedia
Democratic Republic of Congo (Kinshasa)	490	4	86	41	41001	Lusaka Accord	49019990710	Government of Democratic Republic of Congo (Kinshasa)	490	MLC	1269	1	0	1999-07-10	1999-07-10	1999-08-06	1	1999-07-10	1	PA signature	Government of Democratic Republic of Congo (Kinshasa) (490), RCD (1270), MLC (1269), RCD-ML (1271)	-99	PSED_promises
Democratic Republic of Congo (Kinshasa)	490	4	86	41	41001	Lusaka Accord	49019990710	Government of Democratic Republic of Congo (Kinshasa)	490	MLC	1269	1	0	1999-07-10	1999-07-10	1999-08-06	1	1999-08-06	3	civil conflict recurrence	Government of Democratic Republic of Congo (Kinshasa) (490), MLC (1269)	-99	UCDP GED
Democratic Republic of Congo (Kinshasa)	490	4	86	42	42001	Lusaka Accord	49019990710	Government of Democratic Republic of Congo (Kinshasa)	490	RCD-ML	1271	1	0	1999-07-10	1999-07-10	1999-08-06	1	1999-07-10	1	PA signature	Government of Democratic Republic of Congo (Kinshasa) (490), RCD (1270), MLC (1269), RCD-ML (1271)	-99	PSED_promises
Democratic Republic of Congo (Kinshasa)	490	4	86	42	42001	Lusaka Accord	49019990710	Government of Democratic Republic of Congo (Kinshasa)	490	RCD-ML	1271	1	0	1999-07-10	1999-07-10	1999-12-31	4	1999-12-31	3	civil conflict recurrence	Government of Democratic Republic of Congo (Kinshasa) (490), RCD-ML (1271)	-99	UCDP Encyclopedia
Democratic Republic of Congo (Kinshasa)	490	4	86	40	40002	Inter-Congolese Political Negotiations (The Final Act)	49020030402	Government of Democratic Republic of Congo (Kinshasa)	490	RCD	1270	1	1	2001-12-31	2003-04-02	2008-04-02	1	2003-04-02	1	PA signature	Government of Democratic Republic of Congo (Kinshasa) (490), RCD (1270), MLC (1269), RCD-ML (1271)	-99	PSED_promises
Democratic Republic of Congo (Kinshasa)	490	4	86	40	40002	Inter-Congolese Political Negotiations (The Final Act)	49020030402	Government of Democratic Republic of Congo (Kinshasa)	490	RCD	1270	1	1	2001-12-31	2003-04-02	2008-04-02	3	2003-07-15	100	political power-sharing: transitional government is established (see external document for detailed list of who gets what)	RCD (1270)	September, 2003	-99
Democratic Republic of Congo (Kinshasa)	490	4	86	40	40002	Inter-Congolese Political Negotiations (The Final Act)	49020030402	Government of Democratic Republic of Congo (Kinshasa)	490	RCD	1270	1	1	2001-12-31	2003-04-02	2008-04-02	3	2003-07-15	102	political power-sharing: RCD, Vice President Ruberwa, Azarias	RCD (1270)	September, 2003	-99
Democratic Republic of Congo (Kinshasa)	490	4	86	40	40002	Inter-Congolese Political Negotiations (The Final Act)	49020030402	Government of Democratic Republic of Congo (Kinshasa)	490	RCD	1270	1	1	2001-12-31	2003-04-02	2008-04-02	3	2003-07-15	102	political power-sharing: RCD, Min. of Defense, Demobilization, & War Veterans Affairs Ondekane, Jean-Pierre	RCD (1270)	September, 2003	-99
Democratic Republic of Congo (Kinshasa)	490	4	86	40	40002	Inter-Congolese Political Negotiations (The Final Act)	49020030402	Government of Democratic Republic of Congo (Kinshasa)	490	RCD	1270	1	1	2001-12-31	2003-04-02	2008-04-02	3	2003-07-15	102	political power-sharing: RCD, Min. of Economy Mvunabali, Celestin	RCD (1270)	September, 2003	-99
Democratic Republic of Congo (Kinshasa)	490	4	86	40	40002	Inter-Congolese Political Negotiations (The Final Act)	49020030402	Government of Democratic Republic of Congo (Kinshasa)	490	RCD	1270	1	1	2001-12-31	2003-04-02	2008-04-02	3	2003-07-15	104	political power-sharing: RCD, Min. of Budget Muamba, Francois	RCD (1270)	September, 2003	-99
Democratic Republic of Congo (Kinshasa)	490	4	86	40	40002	Inter-Congolese Political Negotiations (The Final Act)	49020030402	Government of Democratic Republic of Congo (Kinshasa)	490	RCD	1270	1	1	2001-12-31	2003-04-02	2008-04-02	3	2003-07-15	104	political power-sharing: RCD, Min. of Family & Women's Affairs Mwangila, Faida	RCD (1270)	September, 2003	-99
Democratic Republic of Congo (Kinshasa)	490	4	86	40	40002	Inter-Congolese Political Negotiations (The Final Act)	49020030402	Government of Democratic Republic of Congo (Kinshasa)	490	RCD	1270	1	1	2001-12-31	2003-04-02	2008-04-02	3	2003-07-15	104	political power-sharing: RCD, Min. of Parastatals Mudumbi, Joseph	RCD (1270)	September, 2003	-99
Democratic Republic of Congo (Kinshasa)	490	4	86	40	40002	Inter-Congolese Political Negotiations (The Final Act)	49020030402	Government of Democratic Republic of Congo (Kinshasa)	490	RCD	1270	1	1	2001-12-31	2003-04-02	2008-04-02	3	2003-07-15	104	political power-sharing: RCD, Min. of Post & Telecommunications Kitembo, Gertrude	RCD (1270)	September, 2003	-99
Democratic Republic of Congo (Kinshasa)	490	4	86	40	40002	Inter-Congolese Political Negotiations (The Final Act)	49020030402	Government of Democratic Republic of Congo (Kinshasa)	490	RCD	1270	1	1	2001-12-31	2003-04-02	2008-04-02	3	2003-07-15	104	political power-sharing: RCD, Min. of Higher Education Ngoy-Kassongo, Emile	RCD (1270)	September, 2003	-99
Democratic Republic of Congo (Kinshasa)	490	4	86	40	40002	Inter-Congolese Political Negotiations (The Final Act)	49020030402	Government of Democratic Republic of Congo (Kinshasa)	490	RCD	1270	1	1	2001-12-31	2003-04-02	2008-04-02	3	2003-07-15	104	political power-sharing: RCD, Min. of Labor & Social Security Baruti, Theo	RCD (1270)	September, 2003	-99
Democratic Republic of Congo (Kinshasa)	490	4	86	40	40002	Inter-Congolese Political Negotiations (The Final Act)	49020030402	Government of Democratic Republic of Congo (Kinshasa)	490	RCD	1270	1	1	2001-12-31	2003-04-02	2008-04-02	1	2003-08-22	121	political power-sharing (rebel group quota in parliament): transitional parliament is inaugurated with quotas for gvt, mlc, rcd, unarmed opposition, civil society - each receiving 94 seats	RCD (1270)	September, 2003	-99
Democratic Republic of Congo (Kinshasa)	490	4	86	40	40002	Inter-Congolese Political Negotiations (The Final Act)	49020030402	Government of Democratic Republic of Congo (Kinshasa)	490	RCD	1270	1	1	2001-12-31	2003-04-02	2008-04-02	4	2003-09-15	200	military power-sharing: high command of new congolese military is sworn in, including 37 generals and senior officers of rebel groups; as RCD former head of army and 110 other officers travel to Kinshasa for swearing in, three high ranking RCD officers refuse to be sworn in - one of them Laurant Nkunda	RCD (1270)	December 2003	-99
Democratic Republic of Congo (Kinshasa)	490	4	86	40	40002	Inter-Congolese Political Negotiations (The Final Act)	49020030402	Government of Democratic Republic of Congo (Kinshasa)	490	RCD	1270	1	1	2001-12-31	2003-04-02	2008-04-02	1	2003-12-08	267	military integration: in ceremony first brigade is integrated	RCD (1270)	-99	BBC Sumary of World Broadcasts, 09.12.2003
Democratic Republic of Congo (Kinshasa)	490	4	86	40	40002	Inter-Congolese Political Negotiations (The Final Act)	49020030402	Government of Democratic Republic of Congo (Kinshasa)	490	RCD	1270	1	1	2001-12-31	2003-04-02	2008-04-02	1	2003-12-09	267	military integration: first 600 soldiers of integrated army presented in Kisangani	RCD (1270)	-99	Defense & Foreign Affairs Daily, 10.12.2003
Democratic Republic of Congo (Kinshasa)	490	4	86	40	40002	Inter-Congolese Political Negotiations (The Final Act)	49020030402	Government of Democratic Republic of Congo (Kinshasa)	490	RCD	1270	1	1	2001-12-31	2003-04-02	2008-04-02	4	2003-12-15	200	military power-sharing: ten commanders are appointed as heads of military regions; IMPORTANT: could be understood as territorial power-sharing!!!	RCD (1270)	December 2003	-99
Democratic Republic of Congo (Kinshasa)	490	4	86	40	40002	Inter-Congolese Political Negotiations (The Final Act)	49020030402	Government of Democratic Republic of Congo (Kinshasa)	490	RCD	1270	1	1	2001-12-31	2003-04-02	2008-04-02	3	2004-01-15	200	military power-sharing: three vacant RCD posts in army high command are filled	RCD (1270)	March 2004	-99
Democratic Republic of Congo (Kinshasa)	490	4	86	40	40002	Inter-Congolese Political Negotiations (The Final Act)	49020030402	Government of Democratic Republic of Congo (Kinshasa)	490	RCD	1270	1	1	2001-12-31	2003-04-02	2008-04-02	1	2004-01-28	267	military integration: Training of integrated units begins	RCD (1270)	March 2004	-99
Democratic Republic of Congo (Kinshasa)	490	4	86	40	40002	Inter-Congolese Political Negotiations (The Final Act)	49020030402	Government of Democratic Republic of Congo (Kinshasa)	490	RCD	1270	1	1	2001-12-31	2003-04-02	2008-04-02	4	2004-09-24	267	military integration: Troops of RCD and MLC have been integrated into police	RCD (1270)	-99	Agence France Presse, 24.09.2004
Democratic Republic of Congo (Kinshasa)	490	4	86	40	40002	Inter-Congolese Political Negotiations (The Final Act)	49020030402	Government of Democratic Republic of Congo (Kinshasa)	490	RCD	1270	1	1	2001-12-31	2003-04-02	2008-04-02	3	2005-04-15	267	military integration: process of military integration boosted as international donors increase funding and four more training centers open	RCD (1270)	September, 2005	-99
Democratic Republic of Congo (Kinshasa)	490	4	86	40	40002	Inter-Congolese Political Negotiations (The Final Act)	49020030402	Government of Democratic Republic of Congo (Kinshasa)	490	RCD	1270	1	1	2001-12-31	2003-04-02	2008-04-02	1	2005-12-19	506	referendum: referendum concerning new constitution is taking place /// congolese electorate: 84% in favour of new constitution at 62% turnout	-99	March 2006	-99
Democratic Republic of Congo (Kinshasa)	490	4	86	40	40002	Inter-Congolese Political Negotiations (The Final Act)	49020030402	Government of Democratic Republic of Congo (Kinshasa)	490	RCD	1270	1	1	2001-12-31	2003-04-02	2008-04-02	4	2005-12-21	267	military integration: Total of more than 3000 troops beginning retraining for integration into national army	RCD (1270)	-99	BBC Monitoring Africa - Political, 21.12.2005
Democratic Republic of Congo (Kinshasa)	490	4	86	40	40002	Inter-Congolese Political Negotiations (The Final Act)	49020030402	Government of Democratic Republic of Congo (Kinshasa)	490	RCD	1270	1	1	2001-12-31	2003-04-02	2008-04-02	1	2006-02-18	507	constitution: constitution is approved by congolese population /// congolese electorate: 84% in favour of new constitution at 62% turnout	-99	March 2006; June 2006	-99
Democratic Republic of Congo (Kinshasa)	490	4	86	40	40002	Inter-Congolese Political Negotiations (The Final Act)	49020030402	Government of Democratic Republic of Congo (Kinshasa)	490	RCD	1270	1	1	2001-12-31	2003-04-02	2008-04-02	1	2006-02-28	267	military integration: several army units are reintegrated in 8th military region	RCD (1270)	-99	BBC Monitoring Africa - Political, 04.03.2005
Democratic Republic of Congo (Kinshasa)	490	4	86	40	40002	Inter-Congolese Political Negotiations (The Final Act)	49020030402	Government of Democratic Republic of Congo (Kinshasa)	490	RCD	1270	1	1	2001-12-31	2003-04-02	2008-04-02	1	2006-03-09	500	proportional representation: law introduced	-99	-99	IPU PARLINE: http://www.ipu.org/parline-e/reports/2375_B.htm
Democratic Republic of Congo (Kinshasa)	490	4	86	40	40002	Inter-Congolese Political Negotiations (The Final Act)	49020030402	Government of Democratic Republic of Congo (Kinshasa)	490	RCD	1270	1	1	2001-12-31	2003-04-02	2008-04-02	4	2006-03-15	267	military integration: 6 of 18 integrated brigades have been trained and deployed	RCD (1270)	March 2006	-99
Democratic Republic of Congo (Kinshasa)	490	4	86	40	40002	Inter-Congolese Political Negotiations (The Final Act)	49020030402	Government of Democratic Republic of Congo (Kinshasa)	490	RCD	1270	1	1	2001-12-31	2003-04-02	2008-04-02	1	2006-07-30	504	parliamentary elections: winning PPRD, MLC, Palu together taking 209 of 500 seats in national assembly [EIU does not give the correct date, event date therefore corrected]	-99	December 2006	-99
Democratic Republic of Congo (Kinshasa)	490	4	86	40	40002	Inter-Congolese Political Negotiations (The Final Act)	49020030402	Government of Democratic Republic of Congo (Kinshasa)	490	RCD	1270	1	1	2001-12-31	2003-04-02	2008-04-02	1	2006-07-30	505	presidential elections (1st round) [EIU does not give the correct date, event date therefore corrected]	-99	December 2006	-99
Democratic Republic of Congo (Kinshasa)	490	4	86	40	40002	Inter-Congolese Political Negotiations (The Final Act)	49020030402	Government of Democratic Republic of Congo (Kinshasa)	490	RCD	1270	1	1	2001-12-31	2003-04-02	2008-04-02	1	2006-08-20	122	political power-sharing (rebel group quota in parliament): with national legislative elections quotas disappear	RCD (1270)	December 2006	-99
Democratic Republic of Congo (Kinshasa)	490	4	86	40	40002	Inter-Congolese Political Negotiations (The Final Act)	49020030402	Government of Democratic Republic of Congo (Kinshasa)	490	RCD	1270	1	1	2001-12-31	2003-04-02	2008-04-02	1	2006-09-15	267	military integration: 4150 former RCD soldiers have completed training and join integrated presidential guard battalion	RCD (1270)	-99	Xinhua General News Service, 18.09.2006
Democratic Republic of Congo (Kinshasa)	490	4	86	40	40002	Inter-Congolese Political Negotiations (The Final Act)	49020030402	Government of Democratic Republic of Congo (Kinshasa)	490	RCD	1270	1	1	2001-12-31	2003-04-02	2008-04-02	4	2006-09-18	267	military integration: Of 18 planned, 14 integrated brigades have been established	RCD (1270)	-99	Business Day (South Africa), 18.09.2006
Democratic Republic of Congo (Kinshasa)	490	4	86	40	40002	Inter-Congolese Political Negotiations (The Final Act)	49020030402	Government of Democratic Republic of Congo (Kinshasa)	490	RCD	1270	1	1	2001-12-31	2003-04-02	2008-04-02	1	2006-10-29	505	presidential elections (2nd round): less than 66% turnout; kabila winning with 58% of the vote; other contenders	-99	December 2006	-99
Democratic Republic of Congo (Kinshasa)	490	4	86	40	40002	Inter-Congolese Political Negotiations (The Final Act)	49020030402	Government of Democratic Republic of Congo (Kinshasa)	490	RCD	1270	1	1	2001-12-31	2003-04-02	2008-04-02	1	2006-12-06	100	political power-sharing: Kabila inaugurated as president, posts of vice-presidents are abolished	RCD (1270)	March 2007	-99
Democratic Republic of Congo (Kinshasa)	490	4	86	40	40002	Inter-Congolese Political Negotiations (The Final Act)	49020030402	Government of Democratic Republic of Congo (Kinshasa)	490	RCD	1270	1	1	2001-12-31	2003-04-02	2008-04-02	1	2006-12-06	103	political power-sharing: Azarias Ruberwa (RCD) is not vice-president anymore (Kabila inaugurated as president, posts of vice-presidents are abolished)	RCD (1270)	March 2007	-99
Democratic Republic of Congo (Kinshasa)	490	4	86	40	40002	Inter-Congolese Political Negotiations (The Final Act)	49020030402	Government of Democratic Republic of Congo (Kinshasa)	490	RCD	1270	1	1	2001-12-31	2003-04-02	2008-04-02	1	2007-02-04	100	political power-sharing: new government is appointed, MLC, RCD and RCD-ML lose all cabinet posts	RCD (1270)	March 2007	-99
Democratic Republic of Congo (Kinshasa)	490	4	86	40	40002	Inter-Congolese Political Negotiations (The Final Act)	49020030402	Government of Democratic Republic of Congo (Kinshasa)	490	RCD	1270	1	1	2001-12-31	2003-04-02	2008-04-02	1	2007-02-04	103	political power-sharing: new government is appointed, RCD loses ministry of defence	RCD (1270)	March 2007	-99
Democratic Republic of Congo (Kinshasa)	490	4	86	40	40002	Inter-Congolese Political Negotiations (The Final Act)	49020030402	Government of Democratic Republic of Congo (Kinshasa)	490	RCD	1270	1	1	2001-12-31	2003-04-02	2008-04-02	1	2007-02-04	103	political power-sharing: new government is appointed, RCD loses ministry of economy	RCD (1270)	March 2007	-99
Democratic Republic of Congo (Kinshasa)	490	4	86	40	40002	Inter-Congolese Political Negotiations (The Final Act)	49020030402	Government of Democratic Republic of Congo (Kinshasa)	490	RCD	1270	1	1	2001-12-31	2003-04-02	2008-04-02	1	2007-02-04	105	political power-sharing: new government is appointed, RCD loses ministry of budget	RCD (1270)	March 2007	-99
Democratic Republic of Congo (Kinshasa)	490	4	86	40	40002	Inter-Congolese Political Negotiations (The Final Act)	49020030402	Government of Democratic Republic of Congo (Kinshasa)	490	RCD	1270	1	1	2001-12-31	2003-04-02	2008-04-02	1	2007-02-04	105	political power-sharing: new government is appointed, RCD loses ministry of family and women's affairs	RCD (1270)	March 2007	-99
Democratic Republic of Congo (Kinshasa)	490	4	86	40	40002	Inter-Congolese Political Negotiations (The Final Act)	49020030402	Government of Democratic Republic of Congo (Kinshasa)	490	RCD	1270	1	1	2001-12-31	2003-04-02	2008-04-02	1	2007-02-04	105	political power-sharing: new government is appointed, RCD loses ministry of parastatals	RCD (1270)	March 2007	-99
Democratic Republic of Congo (Kinshasa)	490	4	86	40	40002	Inter-Congolese Political Negotiations (The Final Act)	49020030402	Government of Democratic Republic of Congo (Kinshasa)	490	RCD	1270	1	1	2001-12-31	2003-04-02	2008-04-02	1	2007-02-04	105	political power-sharing: new government is appointed, RCD loses ministry of post and telecommunications	RCD (1270)	March 2007	-99
Democratic Republic of Congo (Kinshasa)	490	4	86	40	40002	Inter-Congolese Political Negotiations (The Final Act)	49020030402	Government of Democratic Republic of Congo (Kinshasa)	490	RCD	1270	1	1	2001-12-31	2003-04-02	2008-04-02	1	2007-02-04	105	political power-sharing: new government is appointed, RCD loses ministry of higher education	RCD (1270)	March 2007	-99
Democratic Republic of Congo (Kinshasa)	490	4	86	40	40002	Inter-Congolese Political Negotiations (The Final Act)	49020030402	Government of Democratic Republic of Congo (Kinshasa)	490	RCD	1270	1	1	2001-12-31	2003-04-02	2008-04-02	1	2007-02-04	105	political power-sharing: new government is appointed, RCD loses ministry of labor and social security	RCD (1270)	March 2007	-99
Democratic Republic of Congo (Kinshasa)	490	4	86	40	40002	Inter-Congolese Political Negotiations (The Final Act)	49020030402	Government of Democratic Republic of Congo (Kinshasa)	490	RCD	1270	1	1	2001-12-31	2003-04-02	2008-04-02	4	2007-03-15	267	military integration: UN reports, that only 37% of Katanga and South Kivu and 10% of North Kivu troops have been integrated into national army	RCD (1270)	March 2007	-99
Democratic Republic of Congo (Kinshasa)	490	4	86	40	40002	Inter-Congolese Political Negotiations (The Final Act)	49020030402	Government of Democratic Republic of Congo (Kinshasa)	490	RCD	1270	1	1	2001-12-31	2003-04-02	2008-04-02	1	2008-04-02	2	end of 5-year period	-99	-99	UCDP
Democratic Republic of Congo (Kinshasa)	490	4	86	41	41002	Inter-Congolese Political Negotiations (The Final Act)	49020030402	Government of Democratic Republic of Congo (Kinshasa)	490	MLC	1269	1	1	2001-12-31	2003-04-02	2008-04-02	1	2003-04-02	1	PA signature	Government of Democratic Republic of Congo (Kinshasa) (490), RCD (1270), MLC (1269), RCD-ML (1271)	-99	PSED_promises
Democratic Republic of Congo (Kinshasa)	490	4	86	41	41002	Inter-Congolese Political Negotiations (The Final Act)	49020030402	Government of Democratic Republic of Congo (Kinshasa)	490	MLC	1269	1	1	2001-12-31	2003-04-02	2008-04-02	3	2003-07-15	100	political power-sharing: transitional government is established (see external document for detailed list of who gets what)	MLC (1269)	September, 2003	-99
Democratic Republic of Congo (Kinshasa)	490	4	86	41	41002	Inter-Congolese Political Negotiations (The Final Act)	49020030402	Government of Democratic Republic of Congo (Kinshasa)	490	MLC	1269	1	1	2001-12-31	2003-04-02	2008-04-02	3	2003-07-15	102	political power-sharing: Vice President Jean Pierre Bemba (MLC)	MLC (1269)	September, 2003	-99
Democratic Republic of Congo (Kinshasa)	490	4	86	41	41002	Inter-Congolese Political Negotiations (The Final Act)	49020030402	Government of Democratic Republic of Congo (Kinshasa)	490	MLC	1269	1	1	2001-12-31	2003-04-02	2008-04-02	3	2003-07-15	102	political power-sharing: Min. of Foreign Affairs & International Cooperation Antoine Ghonda (MLC)	MLC (1269)	September, 2003	-99
Democratic Republic of Congo (Kinshasa)	490	4	86	41	41002	Inter-Congolese Political Negotiations (The Final Act)	49020030402	Government of Democratic Republic of Congo (Kinshasa)	490	MLC	1269	1	1	2001-12-31	2003-04-02	2008-04-02	3	2003-07-15	104	political power-sharing: MLC, Min. of Agriculture Kangundu, Justin	MLC (1269)	September, 2003	-99
Democratic Republic of Congo (Kinshasa)	490	4	86	41	41002	Inter-Congolese Political Negotiations (The Final Act)	49020030402	Government of Democratic Republic of Congo (Kinshasa)	490	MLC	1269	1	1	2001-12-31	2003-04-02	2008-04-02	3	2003-07-15	104	political power-sharing: MLC, Min. of Public Works & Infrastructure Endundo-Bononge, Jose	MLC (1269)	September, 2003	-99
Democratic Republic of Congo (Kinshasa)	490	4	86	41	41002	Inter-Congolese Political Negotiations (The Final Act)	49020030402	Government of Democratic Republic of Congo (Kinshasa)	490	MLC	1269	1	1	2001-12-31	2003-04-02	2008-04-02	3	2003-07-15	104	political power-sharing: MLC, Min. of Youth & Sports Egbake, Omer	MLC (1269)	September, 2003	-99
Democratic Republic of Congo (Kinshasa)	490	4	86	41	41002	Inter-Congolese Political Negotiations (The Final Act)	49020030402	Government of Democratic Republic of Congo (Kinshasa)	490	MLC	1269	1	1	2001-12-31	2003-04-02	2008-04-02	3	2003-07-15	104	political power-sharing: MLC, Min. of Planning Thambwe, Alexis	MLC (1269)	September, 2003	-99
Democratic Republic of Congo (Kinshasa)	490	4	86	41	41002	Inter-Congolese Political Negotiations (The Final Act)	49020030402	Government of Democratic Republic of Congo (Kinshasa)	490	MLC	1269	1	1	2001-12-31	2003-04-02	2008-04-02	1	2003-08-22	121	political power-sharing (rebel group quota in parliament): transitional parliament is inaugurated with quotas for gvt, mlc, rcd, unarmed opposition, civil society - each receiving 94 seats	MLC (1269)	September, 2003	-99
Democratic Republic of Congo (Kinshasa)	490	4	86	41	41002	Inter-Congolese Political Negotiations (The Final Act)	49020030402	Government of Democratic Republic of Congo (Kinshasa)	490	MLC	1269	1	1	2001-12-31	2003-04-02	2008-04-02	4	2003-09-15	200	military power-sharing: high command of new congolese military is sworn in, including 37 generals and senior officers of rebel groups; as RCD former head of army and 110 other officers travel to Kinshasa for swearing in, three high ranking RCD officers refuse to be sworn in - one of them Laurant Nkunda	MLC (1269)	December 2003	-99
Democratic Republic of Congo (Kinshasa)	490	4	86	41	41002	Inter-Congolese Political Negotiations (The Final Act)	49020030402	Government of Democratic Republic of Congo (Kinshasa)	490	MLC	1269	1	1	2001-12-31	2003-04-02	2008-04-02	1	2003-12-08	267	military integration: in ceremony first brigade is integrated	MLC (1269)	-99	BBC Sumary of World Broadcasts, 09.12.2003
Democratic Republic of Congo (Kinshasa)	490	4	86	41	41002	Inter-Congolese Political Negotiations (The Final Act)	49020030402	Government of Democratic Republic of Congo (Kinshasa)	490	MLC	1269	1	1	2001-12-31	2003-04-02	2008-04-02	1	2003-12-09	267	military integration: first 600 soldiers of integrated army presented in Kisangani	MLC (1269)	-99	Defense & Foreign Affairs Daily, 10.12.2003
Democratic Republic of Congo (Kinshasa)	490	4	86	41	41002	Inter-Congolese Political Negotiations (The Final Act)	49020030402	Government of Democratic Republic of Congo (Kinshasa)	490	MLC	1269	1	1	2001-12-31	2003-04-02	2008-04-02	4	2003-12-15	200	military power-sharing: ten commanders are appointed as heads of military regions; IMPORTANT: could be understood as territorial power-sharing!!!	MLC (1269)	December 2003	-99
Democratic Republic of Congo (Kinshasa)	490	4	86	41	41002	Inter-Congolese Political Negotiations (The Final Act)	49020030402	Government of Democratic Republic of Congo (Kinshasa)	490	MLC	1269	1	1	2001-12-31	2003-04-02	2008-04-02	3	2004-01-15	100	political power-sharing: after rows with president, tourism minister (Roger Nimy, RCD-N) is sacked. Valentin Senga (MLC) new minister of tourism [Nimy is identified as MLC representative in the EIU raw data but on the original cabinet list of the transitional cabinet he is identified as RCD-N. According to the peace agreement, the tourism ministry is also a RCD-N ministry. I therefore regard Nimy…	MLC (1269)	March 2004	-99
Democratic Republic of Congo (Kinshasa)	490	4	86	41	41002	Inter-Congolese Political Negotiations (The Final Act)	49020030402	Government of Democratic Republic of Congo (Kinshasa)	490	MLC	1269	1	1	2001-12-31	2003-04-02	2008-04-02	3	2004-01-15	104	political power-sharing: after rows with president, tourism minister (Roger Nimy, RCD-N) is sacked. Valentin Senga (MLC) new minister of tourism [Nimy is identified as MLC representative in the EIU raw data but on the original cabinet list of the transitional cabinet he is identified as RCD-N. According to the peace agreement, the tourism ministry is also a RCD-N ministry. I therefore regard Nimy…	MLC (1269)	March 2004	-99
Democratic Republic of Congo (Kinshasa)	490	4	86	41	41002	Inter-Congolese Political Negotiations (The Final Act)	49020030402	Government of Democratic Republic of Congo (Kinshasa)	490	MLC	1269	1	1	2001-12-31	2003-04-02	2008-04-02	1	2004-01-28	267	military integration: Training of integrated units begins	MLC (1269)	March 2004	-99
Democratic Republic of Congo (Kinshasa)	490	4	86	41	41002	Inter-Congolese Political Negotiations (The Final Act)	49020030402	Government of Democratic Republic of Congo (Kinshasa)	490	MLC	1269	1	1	2001-12-31	2003-04-02	2008-04-02	4	2004-09-24	267	military integration: Troops of RCD and MLC have been integrated into police	MLC (1269)	-99	Agence France Presse, 24.09.2004
Democratic Republic of Congo (Kinshasa)	490	4	86	41	41002	Inter-Congolese Political Negotiations (The Final Act)	49020030402	Government of Democratic Republic of Congo (Kinshasa)	490	MLC	1269	1	1	2001-12-31	2003-04-02	2008-04-02	3	2005-04-15	267	military integration: process of military integration boosted as international donors increase funding and four more training centers open	MLC (1269)	September, 2005	-99
Democratic Republic of Congo (Kinshasa)	490	4	86	41	41002	Inter-Congolese Political Negotiations (The Final Act)	49020030402	Government of Democratic Republic of Congo (Kinshasa)	490	MLC	1269	1	1	2001-12-31	2003-04-02	2008-04-02	3	2005-11-15	100	political power-sharing: some minor reshuffles and ministry of primary and secondary education goes to MLC	MLC (1269)	December 2005	-99
Democratic Republic of Congo (Kinshasa)	490	4	86	41	41002	Inter-Congolese Political Negotiations (The Final Act)	49020030402	Government of Democratic Republic of Congo (Kinshasa)	490	MLC	1269	1	1	2001-12-31	2003-04-02	2008-04-02	3	2005-11-15	104	political power-sharing: Paul Musafiri (MLC) becomes minister of primary and secondary education, a ministry not held previously by the MLC	MLC (1269)	December 2005	-99
Democratic Republic of Congo (Kinshasa)	490	4	86	41	41002	Inter-Congolese Political Negotiations (The Final Act)	49020030402	Government of Democratic Republic of Congo (Kinshasa)	490	MLC	1269	1	1	2001-12-31	2003-04-02	2008-04-02	1	2005-12-19	506	referendum: referendum concerning new constitution is taking place /// congolese electorate: 84% in favour of new constitution at 62% turnout	-99	March 2006	-99
Democratic Republic of Congo (Kinshasa)	490	4	86	41	41002	Inter-Congolese Political Negotiations (The Final Act)	49020030402	Government of Democratic Republic of Congo (Kinshasa)	490	MLC	1269	1	1	2001-12-31	2003-04-02	2008-04-02	4	2005-12-21	267	military integration: Total of more than 3000 troops beginning retraining for integration into national army	MLC (1269)	-99	BBC Monitoring Africa - Political, 21.12.2005
Democratic Republic of Congo (Kinshasa)	490	4	86	41	41002	Inter-Congolese Political Negotiations (The Final Act)	49020030402	Government of Democratic Republic of Congo (Kinshasa)	490	MLC	1269	1	1	2001-12-31	2003-04-02	2008-04-02	1	2006-02-18	507	constitution: constitution is approved by congolese population /// congolese electorate: 84% in favour of new constitution at 62% turnout	-99	March 2006; June 2006	-99
Democratic Republic of Congo (Kinshasa)	490	4	86	41	41002	Inter-Congolese Political Negotiations (The Final Act)	49020030402	Government of Democratic Republic of Congo (Kinshasa)	490	MLC	1269	1	1	2001-12-31	2003-04-02	2008-04-02	1	2006-02-28	267	military integration: several army units are reintegrated in 8th military region	MLC (1269)	-99	BBC Monitoring Africa - Political, 04.03.2005
Democratic Republic of Congo (Kinshasa)	490	4	86	41	41002	Inter-Congolese Political Negotiations (The Final Act)	49020030402	Government of Democratic Republic of Congo (Kinshasa)	490	MLC	1269	1	1	2001-12-31	2003-04-02	2008-04-02	1	2006-03-09	500	proportional representation: law introduced	-99	-99	IPU PARLINE: http://www.ipu.org/parline-e/reports/2375_B.htm
Democratic Republic of Congo (Kinshasa)	490	4	86	41	41002	Inter-Congolese Political Negotiations (The Final Act)	49020030402	Government of Democratic Republic of Congo (Kinshasa)	490	MLC	1269	1	1	2001-12-31	2003-04-02	2008-04-02	4	2006-03-15	267	military integration: 6 of 18 integrated brigades have been trained and deployed	MLC (1269)	March 2006	-99
Democratic Republic of Congo (Kinshasa)	490	4	86	41	41002	Inter-Congolese Political Negotiations (The Final Act)	49020030402	Government of Democratic Republic of Congo (Kinshasa)	490	MLC	1269	1	1	2001-12-31	2003-04-02	2008-04-02	1	2006-07-30	504	parliamentary elections: winning PPRD, MLC, Palu together taking 209 of 500 seats in national assembly [EIU does not give the correct date, event date therefore corrected]	-99	December 2006	-99
Democratic Republic of Congo (Kinshasa)	490	4	86	41	41002	Inter-Congolese Political Negotiations (The Final Act)	49020030402	Government of Democratic Republic of Congo (Kinshasa)	490	MLC	1269	1	1	2001-12-31	2003-04-02	2008-04-02	1	2006-07-30	505	presidential elections (1st round) [EIU does not give the correct date, event date therefore corrected]	-99	December 2006	-99
Democratic Republic of Congo (Kinshasa)	490	4	86	41	41002	Inter-Congolese Political Negotiations (The Final Act)	49020030402	Government of Democratic Republic of Congo (Kinshasa)	490	MLC	1269	1	1	2001-12-31	2003-04-02	2008-04-02	1	2006-08-20	122	political power-sharing (rebel group quota in parliament): with national legislative elections quotas disappear	MLC (1269)	December 2006	-99
Democratic Republic of Congo (Kinshasa)	490	4	86	41	41002	Inter-Congolese Political Negotiations (The Final Act)	49020030402	Government of Democratic Republic of Congo (Kinshasa)	490	MLC	1269	1	1	2001-12-31	2003-04-02	2008-04-02	4	2006-09-18	267	military integration: Of 18 planned, 14 integrated brigades have been established	MLC (1269)	-99	Business Day (South Africa), 18.09.2006
Democratic Republic of Congo (Kinshasa)	490	4	86	41	41002	Inter-Congolese Political Negotiations (The Final Act)	49020030402	Government of Democratic Republic of Congo (Kinshasa)	490	MLC	1269	1	1	2001-12-31	2003-04-02	2008-04-02	1	2006-10-29	505	presidential elections (2nd round): less than 66% turnout; kabila winning with 58% of the vote; other contenders	-99	December 2006	-99
Democratic Republic of Congo (Kinshasa)	490	4	86	41	41002	Inter-Congolese Political Negotiations (The Final Act)	49020030402	Government of Democratic Republic of Congo (Kinshasa)	490	MLC	1269	1	1	2001-12-31	2003-04-02	2008-04-02	1	2006-12-06	100	political power-sharing: Kabila inaugurated as president, posts of vice-presidents are abolished	MLC (1269)	March 2007	-99
Democratic Republic of Congo (Kinshasa)	490	4	86	41	41002	Inter-Congolese Political Negotiations (The Final Act)	49020030402	Government of Democratic Republic of Congo (Kinshasa)	490	MLC	1269	1	1	2001-12-31	2003-04-02	2008-04-02	1	2006-12-06	103	political power-sharing: Jean-Pierre Bemba (MLC) is not vice-president anymore (Kabila inaugurated as president, posts of vice-presidents are abolished)	MLC (1269)	March 2007	-99
Democratic Republic of Congo (Kinshasa)	490	4	86	41	41002	Inter-Congolese Political Negotiations (The Final Act)	49020030402	Government of Democratic Republic of Congo (Kinshasa)	490	MLC	1269	1	1	2001-12-31	2003-04-02	2008-04-02	1	2007-02-04	100	political power-sharing: new government is appointed, MLC, RCD and RCD-ML lose all cabinet posts	MLC (1269)	March 2007	-99
Democratic Republic of Congo (Kinshasa)	490	4	86	41	41002	Inter-Congolese Political Negotiations (The Final Act)	49020030402	Government of Democratic Republic of Congo (Kinshasa)	490	MLC	1269	1	1	2001-12-31	2003-04-02	2008-04-02	1	2007-02-04	103	political power-sharing: new government is appointed, MLC loses ministry of foreign affairs	MLC (1269)	March 2007	-99
Democratic Republic of Congo (Kinshasa)	490	4	86	41	41002	Inter-Congolese Political Negotiations (The Final Act)	49020030402	Government of Democratic Republic of Congo (Kinshasa)	490	MLC	1269	1	1	2001-12-31	2003-04-02	2008-04-02	1	2007-02-04	105	political power-sharing: new government is appointed, MLC loses ministry of agriculture	MLC (1269)	March 2007	-99
Democratic Republic of Congo (Kinshasa)	490	4	86	41	41002	Inter-Congolese Political Negotiations (The Final Act)	49020030402	Government of Democratic Republic of Congo (Kinshasa)	490	MLC	1269	1	1	2001-12-31	2003-04-02	2008-04-02	1	2007-02-04	105	political power-sharing: new government is appointed, MLC loses ministry of public works and infrastructure	MLC (1269)	March 2007	-99
Democratic Republic of Congo (Kinshasa)	490	4	86	41	41002	Inter-Congolese Political Negotiations (The Final Act)	49020030402	Government of Democratic Republic of Congo (Kinshasa)	490	MLC	1269	1	1	2001-12-31	2003-04-02	2008-04-02	1	2007-02-04	105	political power-sharing: new government is appointed, MLC loses ministry of youth and sports	MLC (1269)	March 2007	-99
Democratic Republic of Congo (Kinshasa)	490	4	86	41	41002	Inter-Congolese Political Negotiations (The Final Act)	49020030402	Government of Democratic Republic of Congo (Kinshasa)	490	MLC	1269	1	1	2001-12-31	2003-04-02	2008-04-02	1	2007-02-04	105	political power-sharing: new government is appointed, MLC loses ministry of planning	MLC (1269)	March 2007	-99
Democratic Republic of Congo (Kinshasa)	490	4	86	41	41002	Inter-Congolese Political Negotiations (The Final Act)	49020030402	Government of Democratic Republic of Congo (Kinshasa)	490	MLC	1269	1	1	2001-12-31	2003-04-02	2008-04-02	1	2007-02-04	105	political power-sharing: new government is appointed, MLC loses ministry of tourism	MLC (1269)	March 2007	-99
Democratic Republic of Congo (Kinshasa)	490	4	86	41	41002	Inter-Congolese Political Negotiations (The Final Act)	49020030402	Government of Democratic Republic of Congo (Kinshasa)	490	MLC	1269	1	1	2001-12-31	2003-04-02	2008-04-02	1	2007-02-04	105	political power-sharing: new government is appointed, MLC loses ministry of primary and secondary education	MLC (1269)	March 2007	-99
Democratic Republic of Congo (Kinshasa)	490	4	86	41	41002	Inter-Congolese Political Negotiations (The Final Act)	49020030402	Government of Democratic Republic of Congo (Kinshasa)	490	MLC	1269	1	1	2001-12-31	2003-04-02	2008-04-02	4	2007-03-15	267	military integration: UN reports, that only 37% of Katanga and South Kivu and 10% of North Kivu troops have been integrated into national army	MLC (1269)	March 2007	-99
Democratic Republic of Congo (Kinshasa)	490	4	86	41	41002	Inter-Congolese Political Negotiations (The Final Act)	49020030402	Government of Democratic Republic of Congo (Kinshasa)	490	MLC	1269	1	1	2001-12-31	2003-04-02	2008-04-02	1	2008-04-02	2	end of 5-year period	-99	-99	UCDP
Democratic Republic of Congo (Kinshasa)	490	4	86	42	42002	Inter-Congolese Political Negotiations (The Final Act)	49020030402	Government of Democratic Republic of Congo (Kinshasa)	490	RCD-ML	1271	1	1	2001-12-31	2003-04-02	2008-04-02	1	2003-04-02	1	PA signature	Government of Democratic Republic of Congo (Kinshasa) (490), RCD (1270), MLC (1269), RCD-ML (1271)	-99	PSED_promises
Democratic Republic of Congo (Kinshasa)	490	4	86	42	42002	Inter-Congolese Political Negotiations (The Final Act)	49020030402	Government of Democratic Republic of Congo (Kinshasa)	490	RCD-ML	1271	1	1	2000-12-31	2003-04-02	2008-04-02	3	2003-07-15	100	political power-sharing: transitional government is established (see external document for detailed list of who gets what)	RCD-ML (1271)	September, 2003	-99
Democratic Republic of Congo (Kinshasa)	490	4	86	42	42002	Inter-Congolese Political Negotiations (The Final Act)	49020030402	Government of Democratic Republic of Congo (Kinshasa)	490	RCD-ML	1271	1	1	2000-12-31	2003-04-02	2008-04-02	3	2003-07-15	104	political power-sharing: RCD-ML, Min. of Regional Cooperation Nyamwisi, Mbusa	RCD-ML (1271)	September, 2003	-99
Democratic Republic of Congo (Kinshasa)	490	4	86	42	42002	Inter-Congolese Political Negotiations (The Final Act)	49020030402	Government of Democratic Republic of Congo (Kinshasa)	490	RCD-ML	1271	1	1	2000-12-31	2003-04-02	2008-04-02	1	2003-08-22	121	political power-sharing (rebel group quota in parliament): transitional parliament is inaugurated with quotas for gvt, mlc, rcd, unarmed opposition, civil society - each receiving 94 seats	RCD-ML (1271)	September, 2003	-99
Democratic Republic of Congo (Kinshasa)	490	4	86	42	42002	Inter-Congolese Political Negotiations (The Final Act)	49020030402	Government of Democratic Republic of Congo (Kinshasa)	490	RCD-ML	1271	1	1	2000-12-31	2003-04-02	2008-04-02	4	2003-09-15	200	military power-sharing: high command of new congolese military is sworn in, including 37 generals and senior officers of rebel groups; as RCD former head of army and 110 other officers travel to Kinshasa for swearing in, three high ranking RCD officers refuse to be sworn in - one of them Laurant Nkunda	RCD-ML (1271)	December 2003	-99
Democratic Republic of Congo (Kinshasa)	490	4	86	42	42002	Inter-Congolese Political Negotiations (The Final Act)	49020030402	Government of Democratic Republic of Congo (Kinshasa)	490	RCD-ML	1271	1	1	2000-12-31	2003-04-02	2008-04-02	3	2005-04-15	267	military integration: process of military integration boosted as international donors increase funding and four more training centers open	RCD-ML (1271)	September, 2005	-99
Democratic Republic of Congo (Kinshasa)	490	4	86	42	42002	Inter-Congolese Political Negotiations (The Final Act)	49020030402	Government of Democratic Republic of Congo (Kinshasa)	490	RCD-ML	1271	1	1	2000-12-31	2003-04-02	2008-04-02	1	2005-12-19	506	referendum: referendum concerning new constitution is taking place /// congolese electorate: 84% in favour of new constitution at 62% turnout	-99	March 2006	-99
Democratic Republic of Congo (Kinshasa)	490	4	86	42	42002	Inter-Congolese Political Negotiations (The Final Act)	49020030402	Government of Democratic Republic of Congo (Kinshasa)	490	RCD-ML	1271	1	1	2000-12-31	2003-04-02	2008-04-02	4	2005-12-21	267	military integration: Total of more than 3000 troops beginning retraining for integration into national army	RCD-ML (1271)	-99	BBC Monitoring Africa - Political, 21.12.2005
Democratic Republic of Congo (Kinshasa)	490	4	86	42	42002	Inter-Congolese Political Negotiations (The Final Act)	49020030402	Government of Democratic Republic of Congo (Kinshasa)	490	RCD-ML	1271	1	1	2000-12-31	2003-04-02	2008-04-02	1	2006-02-18	507	constitution: constitution is approved by congolese population /// congolese electorate: 84% in favour of new constitution at 62% turnout	-99	March 2006; June 2006	-99
Democratic Republic of Congo (Kinshasa)	490	4	86	42	42002	Inter-Congolese Political Negotiations (The Final Act)	49020030402	Government of Democratic Republic of Congo (Kinshasa)	490	RCD-ML	1271	1	1	2000-12-31	2003-04-02	2008-04-02	1	2006-03-09	500	proportional representation: law introduced	-99	-99	IPU PARLINE: http://www.ipu.org/parline-e/reports/2375_B.htm
Democratic Republic of Congo (Kinshasa)	490	4	86	42	42002	Inter-Congolese Political Negotiations (The Final Act)	49020030402	Government of Democratic Republic of Congo (Kinshasa)	490	RCD-ML	1271	1	1	2000-12-31	2003-04-02	2008-04-02	4	2006-03-15	267	military integration: 6 of 18 integrated brigades have been trained and deployed	RCD-ML (1271)	March 2006	-99
Democratic Republic of Congo (Kinshasa)	490	4	86	42	42002	Inter-Congolese Political Negotiations (The Final Act)	49020030402	Government of Democratic Republic of Congo (Kinshasa)	490	RCD-ML	1271	1	1	2000-12-31	2003-04-02	2008-04-02	1	2006-07-30	504	parliamentary elections: winning PPRD, MLC, Palu together taking 209 of 500 seats in national assembly [EIU does not give the correct date, event date therefore corrected]	-99	December 2006	-99
Democratic Republic of Congo (Kinshasa)	490	4	86	42	42002	Inter-Congolese Political Negotiations (The Final Act)	49020030402	Government of Democratic Republic of Congo (Kinshasa)	490	RCD-ML	1271	1	1	2000-12-31	2003-04-02	2008-04-02	1	2006-07-30	505	presidential elections (1st round) [EIU does not give the correct date, event date therefore corrected]	-99	December 2006	-99
Democratic Republic of Congo (Kinshasa)	490	4	86	42	42002	Inter-Congolese Political Negotiations (The Final Act)	49020030402	Government of Democratic Republic of Congo (Kinshasa)	490	RCD-ML	1271	1	1	2000-12-31	2003-04-02	2008-04-02	1	2006-08-20	122	political power-sharing (rebel group quota in parliament): with national legislative elections quotas disappear	RCD-ML (1271)	December 2006	-99
Democratic Republic of Congo (Kinshasa)	490	4	86	42	42002	Inter-Congolese Political Negotiations (The Final Act)	49020030402	Government of Democratic Republic of Congo (Kinshasa)	490	RCD-ML	1271	1	1	2000-12-31	2003-04-02	2008-04-02	1	2006-10-29	505	presidential elections (2nd round): less than 66% turnout; kabila winning with 58% of the vote; other contenders	-99	December 2006	-99
Democratic Republic of Congo (Kinshasa)	490	4	86	42	42002	Inter-Congolese Political Negotiations (The Final Act)	49020030402	Government of Democratic Republic of Congo (Kinshasa)	490	RCD-ML	1271	1	1	2000-12-31	2003-04-02	2008-04-02	1	2007-02-04	100	political power-sharing: new government is appointed, MLC, RCD and RCD-ML lose all cabinet posts	RCD-ML (1271)	March 2007	-99
Democratic Republic of Congo (Kinshasa)	490	4	86	42	42002	Inter-Congolese Political Negotiations (The Final Act)	49020030402	Government of Democratic Republic of Congo (Kinshasa)	490	RCD-ML	1271	1	1	2000-12-31	2003-04-02	2008-04-02	1	2007-02-04	105	political power-sharing: new government is appointed, RCD-ML loses ministry of regional cooperation	RCD-ML (1271)	March 2007	-99
Democratic Republic of Congo (Kinshasa)	490	4	86	42	42002	Inter-Congolese Political Negotiations (The Final Act)	49020030402	Government of Democratic Republic of Congo (Kinshasa)	490	RCD-ML	1271	1	1	2000-12-31	2003-04-02	2008-04-02	4	2007-03-15	267	military integration: UN reports, that only 37% of Katanga and South Kivu and 10% of North Kivu troops have been integrated into national army	RCD-ML (1271)	March 2007	-99
Democratic Republic of Congo (Kinshasa)	490	4	86	42	42002	Inter-Congolese Political Negotiations (The Final Act)	49020030402	Government of Democratic Republic of Congo (Kinshasa)	490	RCD-ML	1271	1	1	2000-12-31	2003-04-02	2008-04-02	1	2008-04-02	2	end of 5-year period	-99	-99	UCDP
Uganda	500	4	118	431	431001	Yumbe Peace Agreement	50020021224	Government of Uganda	500	UNRF II	1339	0	0	1997-12-31	2002-12-24	2007-12-24	1	2002-12-24	1	PA signature	Government of Uganda (500), UNRF II (1339)	-99	PSED_promises
Uganda	500	4	118	431	431001	Yumbe Peace Agreement	50020021224	Government of Uganda	500	UNRF II	1339	0	0	1997-12-31	2002-12-24	2007-12-24	4	2003-01-03	267	military integration: integration of former rebels into national army, 470 former rebels	UNRF II (1339)	-99	Africa News, 03.01.2003
Uganda	500	4	118	431	431001	Yumbe Peace Agreement	50020021224	Government of Uganda	500	UNRF II	1339	0	0	1997-12-31	2002-12-24	2007-12-24	3	2005-07-31	506	referendum: “Do you agree to open up the political space to allow those who wish to join different organisations/parties to do so to compete for political power?"; 92% voted for multiparty politics, but low turnout (only 47%)	-99	4th Quarter 2005	-99
Uganda	500	4	118	431	431001	Yumbe Peace Agreement	50020021224	Government of Uganda	500	UNRF II	1339	0	0	1997-12-31	2002-12-24	2007-12-24	1	2005-08-29	267	military integration: 57 former UNRF II rebels becoming officers	UNRF II (1339)	-99	New Vision, 29.08.2005
Uganda	500	4	118	431	431001	Yumbe Peace Agreement	50020021224	Government of Uganda	500	UNRF II	1339	0	0	1997-12-31	2002-12-24	2007-12-24	1	2006-02-23	504	parliamentary elections: return to multiparty-system; 205 seats for the NRMO, 56 seats for the main opposition parties, 37 independents	-99	2nd Quarter 2006	-99
Uganda	500	4	118	431	431001	Yumbe Peace Agreement	50020021224	Government of Uganda	500	UNRF II	1339	0	0	1997-12-31	2002-12-24	2007-12-24	1	2006-02-23	505	presidential elections: turnout: 68%, Museveni: 59%, his nearest rival, Kizza Besigye: 37%; declared "fair" by the international observers	-99	2nd Quarter 2006	-99
Uganda	500	4	118	431	431001	Yumbe Peace Agreement	50020021224	Government of Uganda	500	UNRF II	1339	0	0	1997-12-31	2002-12-24	2007-12-24	1	2007-10-05	267	military integration: 10 former UNRF II rebels becoming officers	UNRF II (1339)	-99	Africa News, 07.10.2007
Uganda	500	4	118	431	431001	Yumbe Peace Agreement	50020021224	Government of Uganda	500	UNRF II	1339	0	0	1997-12-31	2002-12-24	2007-12-24	1	2007-12-24	2	end of 5-year period	-99	-99	UCDP
Burundi	516	4	90	11	11001	Arusha Peace and Reconciliation Agreement for Burundi	51620000828	Government of Burundi	516	Palipehutu	1276	1	0	1998-05-08	2000-08-28	2005-08-28	1	2000-08-28	1	PA signature	Government of Burundi (516), CNDD (1277), Frolina (1279), Palipehutu (1276)	-99	PSED_promises
Burundi	516	4	90	11	11001	Arusha Peace and Reconciliation Agreement for Burundi	51620000828	Government of Burundi	516	Palipehutu	1276	1	0	1992-12-31	2000-08-28	2005-08-28	1	2001-10-15	508	subsequent peace agreement: peace agreement concerning transitional period signed between Hutu and Tutsi groups	Government of Burundi (516), CNDD (1277), Frolina (1279), Palipehutu (1276)	4th 2001	-99
Burundi	516	4	90	11	11001	Arusha Peace and Reconciliation Agreement for Burundi	51620000828	Government of Burundi	516	Palipehutu	1276	1	0	1992-12-31	2000-08-28	2005-08-28	1	2001-11-01	100	new transitional government sworn in: Salvator Ntihabose becomes minister of interior; Fulgence Dwima Bakana becomes minister of justice; Cyrille Ndayirukiye becomes minister of defence; André Nkundikije becomes minister of development; Françoise Ngendahayo becomes minister of integration; Mathias Hitimana becomes minister of energy; Edouard Kadigiri becomes minister of finance;	Palipehutu (1276)	1st 2002	-99
Burundi	516	4	90	11	11001	Arusha Peace and Reconciliation Agreement for Burundi	51620000828	Government of Burundi	516	Palipehutu	1276	1	0	1992-12-31	2000-08-28	2005-08-28	1	2001-11-01	104	New Minister of Communal Development: Casimir Ngendanganya (Palipehutu)	Palipehutu (1276)	-99	Africa Research Bulletin 2001:10; 14584
Burundi	516	4	90	11	11001	Arusha Peace and Reconciliation Agreement for Burundi	51620000828	Government of Burundi	516	Palipehutu	1276	1	0	1992-12-31	2000-08-28	2005-08-28	1	2003-11-23	100	new cabinet: Mr Nkurunziza new minister of good governance;Salvator Ntihabose replaced by Simon Nyandwi as minister of interior; Salvator Ntihabose new minister of education; Fulgence Dwima-Bakana new minister of public security; Albert Mbonerane replaced by Onésime Nduwimana as minister of communication;Barnabé Muteragiranwa replaced by Mr Ndayikengurukiye as minister of tourism; Barnabé Muterag…	Palipehutu (1276)	1st 2004	-99
Burundi	516	4	90	11	11001	Arusha Peace and Reconciliation Agreement for Burundi	51620000828	Government of Burundi	516	Palipehutu	1276	1	0	1992-12-31	2000-08-28	2005-08-28	1	2003-11-23	105	Old Minister of Communal Development: Casimir Ngendanganya (Palipehutu)	Palipehutu (1276)	1st 2004	-99
Burundi	516	4	90	11	11001	Arusha Peace and Reconciliation Agreement for Burundi	51620000828	Government of Burundi	516	Palipehutu	1276	1	0	1992-12-31	2000-08-28	2005-08-28	1	2004-11-01	507	constitution: new transitional constitution enacted [MO: given the raw data, I set edate on 01/11/2004 and set edateprec on 1]	-99	1st 2005	-99
Burundi	516	4	90	11	11001	Arusha Peace and Reconciliation Agreement for Burundi	51620000828	Government of Burundi	516	Palipehutu	1276	1	0	1992-12-31	2000-08-28	2005-08-28	1	2005-02-28	506	referendum: about new constitution; result: 90,1 yes, 7,8 no	-99	2nd 2005	-99
Burundi	516	4	90	11	11001	Arusha Peace and Reconciliation Agreement for Burundi	51620000828	Government of Burundi	516	Palipehutu	1276	1	0	1992-12-31	2000-08-28	2005-08-28	1	2005-02-28	507	constitution: new constitution, constitution enacted through referendum	-99	2005, 2nd quarter	-99
Burundi	516	4	90	11	11001	Arusha Peace and Reconciliation Agreement for Burundi	51620000828	Government of Burundi	516	Palipehutu	1276	1	0	1992-12-31	2000-08-28	2005-08-28	1	2005-07-04	504	parliamentary elections: results (in table in source): CNDD-FDD 57%; Frodebu 23%; Uprona 6%; CNDD 4%	-99	3rd 2005	-99
Burundi	516	4	90	11	11001	Arusha Peace and Reconciliation Agreement for Burundi	51620000828	Government of Burundi	516	Palipehutu	1276	1	0	1992-12-31	2000-08-28	2005-08-28	1	2005-08-28	2	end of 5-year period	-99	-99	UCDP
Burundi	516	4	90	12	12001	Arusha Peace and Reconciliation Agreement for Burundi	51620000828	Government of Burundi	516	CNDD	1277	1	0	1998-05-08	2000-08-28	2005-08-28	1	2000-08-28	1	PA signature	Government of Burundi (516), CNDD (1277), Frolina (1279), Palipehutu (1276)	-99	PSED_promises
Burundi	516	4	90	12	12001	Arusha Peace and Reconciliation Agreement for Burundi	51620000828	Government of Burundi	516	CNDD	1277	1	0	1998-05-08	2000-08-28	2005-08-28	1	2001-10-15	508	subsequent peace agreement: peace agreement concerning transitional period signed between Hutu and Tutsi groups	Government of Burundi (516), CNDD (1277), Frolina (1279), Palipehutu (1276)	4th 2001	-99
Burundi	516	4	90	12	12001	Arusha Peace and Reconciliation Agreement for Burundi	51620000828	Government of Burundi	516	CNDD	1277	1	0	1998-05-08	2000-08-28	2005-08-28	1	2001-11-01	100	new transitional government sworn in: Salvator Ntihabose becomes minister of interior; Fulgence Dwima Bakana becomes minister of justice; Cyrille Ndayirukiye becomes minister of defence; André Nkundikije becomes minister of development; Françoise Ngendahayo becomes minister of integration; Mathias Hitimana becomes minister of energy; Edouard Kadigiri becomes minister of finance;	CNDD (1277)	1st 2002	-99
Burundi	516	4	90	12	12001	Arusha Peace and Reconciliation Agreement for Burundi	51620000828	Government of Burundi	516	CNDD	1277	1	0	1998-05-08	2000-08-28	2005-08-28	1	2001-11-01	104	New Minister of Civil Service: Festus Ntanyungu (CNDD)	CNDD (1277)	-99	Africa Research Bulletin 2001:10; 14584
Burundi	516	4	90	12	12001	Arusha Peace and Reconciliation Agreement for Burundi	51620000828	Government of Burundi	516	CNDD	1277	1	0	1998-05-08	2000-08-28	2005-08-28	1	2001-11-01	104	New Minister of Communications and Government Spokesman: Albert Mbonerane (CNDD)	CNDD (1277)	-99	Africa Research Bulletin 2001:10; 14584
Burundi	516	4	90	12	12001	Arusha Peace and Reconciliation Agreement for Burundi	51620000828	Government of Burundi	516	CNDD	1277	1	0	1998-05-08	2000-08-28	2005-08-28	1	2003-05-06	100	On Monday, President Ndayizeye named Gaspard Kobako, a senior member of the smallest faction of the FDD, minister of public services. Cyrille Hicintuku, a member of the smallest faction of the National Liberation Forces, or FNL, was appointed minister of public works and development.	CNDD (1277)	-99	BBC News (http://news.bbc.co.uk/2/hi/africa/3004207.stm)
Burundi	516	4	90	12	12001	Arusha Peace and Reconciliation Agreement for Burundi	51620000828	Government of Burundi	516	CNDD	1277	1	0	1998-05-08	2000-08-28	2005-08-28	1	2003-05-06	105	Old Minister of Civil Service: Festus Ntanyungu (CNDD)	CNDD (1277)	-99	BBC News (http://news.bbc.co.uk/2/hi/africa/3004207.stm)
Burundi	516	4	90	12	12001	Arusha Peace and Reconciliation Agreement for Burundi	51620000828	Government of Burundi	516	CNDD	1277	1	0	1998-05-08	2000-08-28	2005-08-28	1	2003-11-23	100	new cabinet: Mr Nkurunziza new minister of good governance;Salvator Ntihabose replaced by Simon Nyandwi as minister of interior; Salvator Ntihabose new minister of education; Fulgence Dwima-Bakana new minister of public security; Albert Mbonerane replaced by Onésime Nduwimana as minister of communication;Barnabé Muteragiranwa replaced by Mr Ndayikengurukiye as minister of tourism; Barnabé Muterag…	CNDD (1277)	1st 2004	-99
Burundi	516	4	90	12	12001	Arusha Peace and Reconciliation Agreement for Burundi	51620000828	Government of Burundi	516	CNDD	1277	1	0	1998-05-08	2000-08-28	2005-08-28	1	2003-11-23	105	Old Minister of Communications and Government Spokesman: Albert Mbonerane (CNDD)	CNDD (1277)	1st 2004	-99
Burundi	516	4	90	12	12001	Arusha Peace and Reconciliation Agreement for Burundi	51620000828	Government of Burundi	516	CNDD	1277	1	0	1998-05-08	2000-08-28	2005-08-28	1	2004-11-01	507	constitution: new transitional constitution enacted [MO: given the raw data, I set edate on 01/11/2004 and set edateprec on 1]	-99	1st 2005	-99
Burundi	516	4	90	12	12001	Arusha Peace and Reconciliation Agreement for Burundi	51620000828	Government of Burundi	516	CNDD	1277	1	0	1998-05-08	2000-08-28	2005-08-28	1	2005-02-28	506	referendum: about new constitution; result: 90,1 yes, 7,8 no	-99	2nd 2005	-99
Burundi	516	4	90	12	12001	Arusha Peace and Reconciliation Agreement for Burundi	51620000828	Government of Burundi	516	CNDD	1277	1	0	1998-05-08	2000-08-28	2005-08-28	1	2005-02-28	507	constitution: new constitution, constitution enacted through referendum	-99	2005, 2nd quarter	-99
Burundi	516	4	90	12	12001	Arusha Peace and Reconciliation Agreement for Burundi	51620000828	Government of Burundi	516	CNDD	1277	1	0	1998-05-08	2000-08-28	2005-08-28	1	2005-04-01	100	change in cabinet, post-referendum cabinet announced	CNDD (1277)	-99	Africa Research Bulletin 2005:04; 16138
Burundi	516	4	90	12	12001	Arusha Peace and Reconciliation Agreement for Burundi	51620000828	Government of Burundi	516	CNDD	1277	1	0	1998-05-08	2000-08-28	2005-08-28	1	2005-04-01	104	New Minister of Territorial Development, Environment and Tourism: Albert Mbonerane (CNDD)	CNDD (1277)	-99	Africa Research Bulletin 2005:04; 16138
Burundi	516	4	90	12	12001	Arusha Peace and Reconciliation Agreement for Burundi	51620000828	Government of Burundi	516	CNDD	1277	1	0	1998-05-08	2000-08-28	2005-08-28	1	2005-07-04	504	parliamentary elections: results (in table in source): CNDD-FDD 57%; Frodebu 23%; Uprona 6%; CNDD 4%	-99	3rd 2005	-99
Burundi	516	4	90	12	12001	Arusha Peace and Reconciliation Agreement for Burundi	51620000828	Government of Burundi	516	CNDD	1277	1	0	1998-05-08	2000-08-28	2005-08-28	1	2005-08-28	2	end of 5-year period	-99	-99	UCDP
Burundi	516	4	90	13	13001	Arusha Peace and Reconciliation Agreement for Burundi	51620000828	Government of Burundi	516	Frolina	1279	1	0	1998-05-08	2000-08-28	2005-08-28	1	2000-08-28	1	PA signature	Government of Burundi (516), CNDD (1277), Frolina (1279), Palipehutu (1276)	-99	PSED_promises
Burundi	516	4	90	13	13001	Arusha Peace and Reconciliation Agreement for Burundi	51620000828	Government of Burundi	516	Frolina	1279	1	0	1997-12-31	2000-08-28	2005-08-28	1	2001-10-15	508	subsequent peace agreement: peace agreement concerning transitional period signed between Hutu and Tutsi groups	Government of Burundi (516), CNDD (1277), Frolina (1279), Palipehutu (1276)	4th 2001	-99
Burundi	516	4	90	13	13001	Arusha Peace and Reconciliation Agreement for Burundi	51620000828	Government of Burundi	516	Frolina	1279	1	0	1997-12-31	2000-08-28	2005-08-28	1	2004-11-01	507	constitution: new transitional constitution enacted [MO: given the raw data, I set edate on 01/11/2004 and set edateprec on 1]	-99	1st 2005	-99
Burundi	516	4	90	13	13001	Arusha Peace and Reconciliation Agreement for Burundi	51620000828	Government of Burundi	516	Frolina	1279	1	0	1997-12-31	2000-08-28	2005-08-28	1	2005-02-28	506	referendum: about new constitution; result: 90,1 yes, 7,8 no	-99	2nd 2005	-99
Burundi	516	4	90	13	13001	Arusha Peace and Reconciliation Agreement for Burundi	51620000828	Government of Burundi	516	Frolina	1279	1	0	1997-12-31	2000-08-28	2005-08-28	1	2005-02-28	507	constitution: new constitution, constitution enacted through referendum	-99	2005, 2nd quarter	-99
Burundi	516	4	90	13	13001	Arusha Peace and Reconciliation Agreement for Burundi	51620000828	Government of Burundi	516	Frolina	1279	1	0	1997-12-31	2000-08-28	2005-08-28	1	2005-07-04	504	parliamentary elections: results (in table in source): CNDD-FDD 57%; Frodebu 23%; Uprona 6%; CNDD 4%	-99	3rd 2005	-99
Burundi	516	4	90	13	13001	Arusha Peace and Reconciliation Agreement for Burundi	51620000828	Government of Burundi	516	Frolina	1279	1	0	1997-12-31	2000-08-28	2005-08-28	1	2005-08-28	2	end of 5-year period	-99	-99	UCDP
Burundi	516	4	90	14	14001	Global Ceasefire Agreement between Transitional Government and the Forces pour la defence de la democratie (CNDD-FDD)	51620031116	Government of Burundi	516	CNDD-FDD	1280	0	0	2003-11-16	2003-11-16	2008-11-16	1	2003-11-16	1	PA signature	Government of Burundi (516), CNDD-FDD (1280)	-99	PSED_promises
Burundi	516	4	90	14	14001	Global Ceasefire Agreement between Transitional Government and the Forces pour la defence de la democratie (CNDD-FDD)	51620031116	Government of Burundi	516	CNDD-FDD	1280	0	0	2003-11-16	2003-11-16	2008-11-16	1	2003-11-23	100	change in cabinet, new government announced incorporating CNDD-FDD ministers	CNDD-FDD (1280)	2004, 1st quarter	-99
Burundi	516	4	90	14	14001	Global Ceasefire Agreement between Transitional Government and the Forces pour la defence de la democratie (CNDD-FDD)	51620031116	Government of Burundi	516	CNDD-FDD	1280	0	0	2003-11-16	2003-11-16	2008-11-16	1	2003-11-23	102	New Minister of Interior: Simon Nyandwi (CNDD-FDD)	CNDD-FDD (1280)	2004, 1st quarter	-99
Burundi	516	4	90	14	14001	Global Ceasefire Agreement between Transitional Government and the Forces pour la defence de la democratie (CNDD-FDD)	51620031116	Government of Burundi	516	CNDD-FDD	1280	0	0	2003-11-16	2003-11-16	2008-11-16	1	2003-11-23	104	New Minister of Communication and Government Spokesperson: Onésime Nduwimana (CNDD-FDD)	CNDD-FDD (1280)	2004, 1st quarter	-99
Burundi	516	4	90	14	14001	Global Ceasefire Agreement between Transitional Government and the Forces pour la defence de la democratie (CNDD-FDD)	51620031116	Government of Burundi	516	CNDD-FDD	1280	0	0	2003-11-16	2003-11-16	2008-11-16	1	2003-11-23	104	New Minister of Good Governance and State Inspection: Pierra Nkurunziza (CNDD-FDD)	CNDD-FDD (1280)	2004, 1st quarter	-99
Burundi	516	4	90	14	14001	Global Ceasefire Agreement between Transitional Government and the Forces pour la defence de la democratie (CNDD-FDD)	51620031116	Government of Burundi	516	CNDD-FDD	1280	0	0	2003-11-16	2003-11-16	2008-11-16	1	2004-01-06	200	military power-sharing: high-ranking rebel officers are integrated into national army command, 35-member military high command appointed with 21 men drawn from the Tutsi-dominated Forces armés du Burundi (FAB, national army) and 14 from Nkurunziza's faction of the CNDD-FDD	CNDD-FDD (1280)	2004, 1st quarter	-99
Burundi	516	4	90	14	14001	Global Ceasefire Agreement between Transitional Government and the Forces pour la defence de la democratie (CNDD-FDD)	51620031116	Government of Burundi	516	CNDD-FDD	1280	0	0	2003-11-16	2003-11-16	2008-11-16	3	2004-02-29	267	military integration: out of 1,217 officers in the FDN, 671 are drawn from the FAB, and 487 from the CNDD-FDD, comprising 95% of the total, with the remaining 59 positions divided between the five minor militia	CNDD-FDD (1280)	2005, 2nd quarter	-99
Burundi	516	4	90	14	14001	Global Ceasefire Agreement between Transitional Government and the Forces pour la defence de la democratie (CNDD-FDD)	51620031116	Government of Burundi	516	CNDD-FDD	1280	0	0	2003-11-16	2003-11-16	2008-11-16	3	2004-03-15	267	military integration: joint training of 400 CNDD-FDD soldiers and 800 soldiers from the FAB in order to form an integrated military unit to replace the current Unit for the Security of Institutions	CNDD-FDD (1280)	2004, 2nd quarter	ABP news agency, 16.03.2004, Associated Press Worldstream, 17.03.2004
Burundi	516	4	90	14	14001	Global Ceasefire Agreement between Transitional Government and the Forces pour la defence de la democratie (CNDD-FDD)	51620031116	Government of Burundi	516	CNDD-FDD	1280	0	0	2003-11-16	2003-11-16	2008-11-16	1	2004-03-25	267	military integration: new unified police high command formally established, 24-member high command, which is in charge of the country's 5,000 gendarmes, contains seven men from the CNDD-FDD, thus giving the movement the promised 35%	CNDD-FDD (1280)	2004, 2nd quarter	-99
Burundi	516	4	90	14	14001	Global Ceasefire Agreement between Transitional Government and the Forces pour la defence de la democratie (CNDD-FDD)	51620031116	Government of Burundi	516	CNDD-FDD	1280	0	0	2003-11-16	2003-11-16	2008-11-16	1	2004-05-17	267	military integration: president Ndayizeye appoints Mr Emmanuel Miburo as advisor to the National Intelligence Service administrator-general	CNDD-FDD (1280)	-99	Radio Publique Africaine, 18.05.2004
Burundi	516	4	90	14	14001	Global Ceasefire Agreement between Transitional Government and the Forces pour la defence de la democratie (CNDD-FDD)	51620031116	Government of Burundi	516	CNDD-FDD	1280	0	0	2003-11-16	2003-11-16	2008-11-16	1	2004-11-01	507	constitution: new transitional constitution enacted [MO: given the raw data, I set edate on 01/11/2004 and set edateprec on 1]	-99	1st 2005	-99
Burundi	516	4	90	14	14001	Global Ceasefire Agreement between Transitional Government and the Forces pour la defence de la democratie (CNDD-FDD)	51620031116	Government of Burundi	516	CNDD-FDD	1280	0	0	2003-11-16	2003-11-16	2008-11-16	1	2004-12-31	267	military integration: new army established, is to include 30,000 men, with a police force of 20,000, old army FAB and Forces for the Defence of Democracy (FDD) cease to exist	CNDD-FDD (1280)	-99	Agence France Press, 03.01.2005
Burundi	516	4	90	14	14001	Global Ceasefire Agreement between Transitional Government and the Forces pour la defence de la democratie (CNDD-FDD)	51620031116	Government of Burundi	516	CNDD-FDD	1280	0	0	2003-11-16	2003-11-16	2008-11-16	1	2005-01-28	267	military integration: president Ndayizeye signs a decree appointing General Alain Bunyoni as head of the country's new national police	CNDD-FDD (1280)	-99	Agence France Press, 28.01.2005
Burundi	516	4	90	14	14001	Global Ceasefire Agreement between Transitional Government and the Forces pour la defence de la democratie (CNDD-FDD)	51620031116	Government of Burundi	516	CNDD-FDD	1280	0	0	2003-11-16	2003-11-16	2008-11-16	1	2005-02-28	506	referendum: voters asked to accept or reject the constitution, 92.4% of registered voters, yes: 90.1%, no: 7.8%	-99	2005, 2nd quarter	-99
Burundi	516	4	90	14	14001	Global Ceasefire Agreement between Transitional Government and the Forces pour la defence de la democratie (CNDD-FDD)	51620031116	Government of Burundi	516	CNDD-FDD	1280	0	0	2003-11-16	2003-11-16	2008-11-16	1	2005-02-28	507	constitution: new constitution, constitution enacted through referendum	-99	2005, 2nd quarter	-99
Burundi	516	4	90	14	14001	Global Ceasefire Agreement between Transitional Government and the Forces pour la defence de la democratie (CNDD-FDD)	51620031116	Government of Burundi	516	CNDD-FDD	1280	0	0	2003-11-16	2003-11-16	2008-11-16	1	2005-03-22	100	change in cabinet, ministry of interior	CNDD-FDD (1280)	2005, 2nd quarter	Africa Research Bulletin 2005:04; 16138
Burundi	516	4	90	14	14001	Global Ceasefire Agreement between Transitional Government and the Forces pour la defence de la democratie (CNDD-FDD)	51620031116	Government of Burundi	516	CNDD-FDD	1280	0	0	2003-11-16	2003-11-16	2008-11-16	1	2005-03-22	103	change in cabinet, ministry of interior /// interior: former minister Simon Nyandwi - vacant /// Nyandwi: died apparently due to malaria	CNDD-FDD (1280)	2005, 2nd quarter	Africa Research Bulletin 2005:04; 16138
Burundi	516	4	90	14	14001	Global Ceasefire Agreement between Transitional Government and the Forces pour la defence de la democratie (CNDD-FDD)	51620031116	Government of Burundi	516	CNDD-FDD	1280	0	0	2003-11-16	2003-11-16	2008-11-16	1	2005-03-25	267	military integration: 1,889 ex-CNDD/FDD-combatants (over 50% of 3,500 combatants living in Gashingwa cantonment site) integrated into national army	CNDD-FDD (1280)	-99	Radio Publique Africaine, 26.03.2005
Burundi	516	4	90	14	14001	Global Ceasefire Agreement between Transitional Government and the Forces pour la defence de la democratie (CNDD-FDD)	51620031116	Government of Burundi	516	CNDD-FDD	1280	0	0	2003-11-16	2003-11-16	2008-11-16	1	2005-04-01	100	change in cabinet, post-referendum cabinet announced	CNDD-FDD (1280)	-99	Africa Research Bulletin 2005:04; 16138
Burundi	516	4	90	14	14001	Global Ceasefire Agreement between Transitional Government and the Forces pour la defence de la democratie (CNDD-FDD)	51620031116	Government of Burundi	516	CNDD-FDD	1280	0	0	2003-11-16	2003-11-16	2008-11-16	1	2005-04-01	104	New Minister of Civil Service: Gaspard Kobako (CNDD-FDD)	CNDD-FDD (1280)	-99	Africa Research Bulletin 2005:04; 16138
Burundi	516	4	90	14	14001	Global Ceasefire Agreement between Transitional Government and the Forces pour la defence de la democratie (CNDD-FDD)	51620031116	Government of Burundi	516	CNDD-FDD	1280	0	0	2003-11-16	2003-11-16	2008-11-16	1	2005-04-01	104	New Minister for Public Works and Equipment: Salvator Ntahomenyereye (FDD; CNDD-FDD)	CNDD-FDD (1280)	-99	Africa Research Bulletin 2005:04; 16138
Burundi	516	4	90	14	14001	Global Ceasefire Agreement between Transitional Government and the Forces pour la defence de la democratie (CNDD-FDD)	51620031116	Government of Burundi	516	CNDD-FDD	1280	0	0	2003-11-16	2003-11-16	2008-11-16	1	2005-05-10	100	change in cabinet, ministry of Interior, appointed after dispute between president Ndayizeye and CNDD/FDD over choice of a replacement for the interior minister dissolved	CNDD-FDD (1280)	2005, 3rd quarter	date: Africa Research Bulletin 2005:06; 16207
Burundi	516	4	90	14	14001	Global Ceasefire Agreement between Transitional Government and the Forces pour la defence de la democratie (CNDD-FDD)	51620031116	Government of Burundi	516	CNDD-FDD	1280	0	0	2003-11-16	2003-11-16	2008-11-16	1	2005-05-10	102	change in cabinet, ministry of Interior, appointed after dispute between president Ndayizeye and CNDD/FDD over choice of a replacement for the interior minister dissolved /// Interior: former minister Simon Nyandwi (CNDD/FDD)- new minister Jean-Marie Ngendahayo (CNDD/FDD) /// Nyandwi: died apparently due to malaria; Ngendahayo: Tutsi who had earned widespread respect in the Hutu-dominated Frodebu…	CNDD-FDD (1280)	2005, 3rd quarter	date: Africa Research Bulletin 2005:06; 16207
Burundi	516	4	90	14	14001	Global Ceasefire Agreement between Transitional Government and the Forces pour la defence de la democratie (CNDD-FDD)	51620031116	Government of Burundi	516	CNDD-FDD	1280	0	0	2003-11-16	2003-11-16	2008-11-16	1	2005-07-04	504	parliamentary elections: turnout: 78% (according to CENI) - 66% (according to ONUB), total amount of seats: 118, CNDD-FDD: 1,398,159 votes - 57.80% - 59 (64) seats, Frodebu: 524,328 votes - 21.68% - 25 (30) seats, Uprona: 173,438 votes - 7.17% - 10 (15) seats, CNDD: 118,996 votes - 4.92% - 04 (04) seats		2005, 3rd quarter	-99
Burundi	516	4	90	14	14001	Global Ceasefire Agreement between Transitional Government and the Forces pour la defence de la democratie (CNDD-FDD)	51620031116	Government of Burundi	516	CNDD-FDD	1280	0	0	2003-11-16	2003-11-16	2008-11-16	1	2005-08-26	100	New President: Pierre Nkurunziza (CNDD-FDD) sworn in	CNDD-FDD (1280)	2005, 4th quarter	-99
Burundi	516	4	90	14	14001	Global Ceasefire Agreement between Transitional Government and the Forces pour la defence de la democratie (CNDD-FDD)	51620031116	Government of Burundi	516	CNDD-FDD	1280	0	0	2003-11-16	2003-11-16	2008-11-16	1	2005-08-26	102	New President: Pierre Nkurunziza (CNDD-FDD) sworn in	CNDD-FDD (1280)	2005, 4th quarter	-99
Burundi	516	4	90	14	14001	Global Ceasefire Agreement between Transitional Government and the Forces pour la defence de la democratie (CNDD-FDD)	51620031116	Government of Burundi	516	CNDD-FDD	1280	0	0	2003-11-16	2003-11-16	2008-11-16	1	2005-08-30	100	change in cabinet, new president Pierre Nkurunziza (CNDD-FDD) announces his vice-presidents and government	CNDD-FDD (1280)	2005, 4th quarter	-99
Burundi	516	4	90	14	14001	Global Ceasefire Agreement between Transitional Government and the Forces pour la defence de la democratie (CNDD-FDD)	51620031116	Government of Burundi	516	CNDD-FDD	1280	0	0	2003-11-16	2003-11-16	2008-11-16	1	2005-08-30	102	New Second Vice-President: Alice Nzomukunda (CNDD-FDD)	CNDD-FDD (1280)	2005, 4th quarter	-99
Burundi	516	4	90	14	14001	Global Ceasefire Agreement between Transitional Government and the Forces pour la defence de la democratie (CNDD-FDD)	51620031116	Government of Burundi	516	CNDD-FDD	1280	0	0	2003-11-16	2003-11-16	2008-11-16	1	2005-08-30	102	New Minister of Commerce & Industry: Denise Sinankwa (CNDD-FDD)	CNDD-FDD (1280)	2005, 4th quarter	-99
Burundi	516	4	90	14	14001	Global Ceasefire Agreement between Transitional Government and the Forces pour la defence de la democratie (CNDD-FDD)	51620031116	Government of Burundi	516	CNDD-FDD	1280	0	0	2003-11-16	2003-11-16	2008-11-16	1	2005-08-30	102	New Minister of Finance: Dieudonne Ngowembona (CNDD-FDD)	CNDD-FDD (1280)	2005, 4th quarter	-99
Burundi	516	4	90	14	14001	Global Ceasefire Agreement between Transitional Government and the Forces pour la defence de la democratie (CNDD-FDD)	51620031116	Government of Burundi	516	CNDD-FDD	1280	0	0	2003-11-16	2003-11-16	2008-11-16	1	2005-08-30	102	New Minister of Foreign Affairs & Co-operation: Antoinette Batumubwira (CNDD-FDD)	CNDD-FDD (1280)	2005, 4th quarter	-99
Burundi	516	4	90	14	14001	Global Ceasefire Agreement between Transitional Government and the Forces pour la defence de la democratie (CNDD-FDD)	51620031116	Government of Burundi	516	CNDD-FDD	1280	0	0	2003-11-16	2003-11-16	2008-11-16	1	2005-08-30	102	New Minister of Justice: Clothilde Niragira (CNDD-FDD)	CNDD-FDD (1280)	2005, 4th quarter	-99
Burundi	516	4	90	14	14001	Global Ceasefire Agreement between Transitional Government and the Forces pour la defence de la democratie (CNDD-FDD)	51620031116	Government of Burundi	516	CNDD-FDD	1280	0	0	2003-11-16	2003-11-16	2008-11-16	1	2005-08-30	104	New Minister of Education & Culture: Sàdi Kibeya (CNDD-FDD)	CNDD-FDD (1280)	2005, 4th quarter	-99
Burundi	516	4	90	14	14001	Global Ceasefire Agreement between Transitional Government and the Forces pour la defence de la democratie (CNDD-FDD)	51620031116	Government of Burundi	516	CNDD-FDD	1280	0	0	2003-11-16	2003-11-16	2008-11-16	1	2005-08-30	104	New Minister of Energy & Mines: Herman Tuyaga (CNDD-FDD)	CNDD-FDD (1280)	2005, 4th quarter	-99
Burundi	516	4	90	14	14001	Global Ceasefire Agreement between Transitional Government and the Forces pour la defence de la democratie (CNDD-FDD)	51620031116	Government of Burundi	516	CNDD-FDD	1280	0	0	2003-11-16	2003-11-16	2008-11-16	1	2005-08-30	104	New Minister of Transport & Telecommunications: Jean Bigirimana (CNDD-FDD)	CNDD-FDD (1280)	2005, 4th quarter	-99
Burundi	516	4	90	14	14001	Global Ceasefire Agreement between Transitional Government and the Forces pour la defence de la democratie (CNDD-FDD)	51620031116	Government of Burundi	516	CNDD-FDD	1280	0	0	2003-11-16	2003-11-16	2008-11-16	1	2005-08-30	105	Old Minister of Civil Service: Gaspard Kobako (CNDD-FDD)	CNDD-FDD (1280)	2005, 4th quarter	-99
Burundi	516	4	90	14	14001	Global Ceasefire Agreement between Transitional Government and the Forces pour la defence de la democratie (CNDD-FDD)	51620031116	Government of Burundi	516	CNDD-FDD	1280	0	0	2003-11-16	2003-11-16	2008-11-16	1	2006-01-06	300	economic power-sharing: Nkurunziza appoints CNDD-FDD supporters to key positions in the civil service and parastatals, Banque de la République du Burundi, Régie de distribution de l'eau et de l'électricité (Regideso), the Institut national de sécurité sociale (INSS), the Office du café industriel du Burundi (Ocibu), the Régie nationale des postes (RNP) and the customs authority /// president Nkur…	CNDD-FDD (1280)	2006, 1st quarter	-99
Burundi	516	4	90	14	14001	Global Ceasefire Agreement between Transitional Government and the Forces pour la defence de la democratie (CNDD-FDD)	51620031116	Government of Burundi	516	CNDD-FDD	1280	0	0	2003-11-16	2003-11-16	2008-11-16	1	2006-01-06	302	economic power-sharing: Nkurunziza appoints CNDD-FDD supporters to key positions in the civil service and parastatals, Banque de la République du Burundi, Régie de distribution de l'eau et de l'électricité (Regideso), the Institut national de sécurité sociale (INSS), the Office du café industriel du Burundi (Ocibu), the Régie nationale des postes (RNP) and the customs authority /// president Nkur…	CNDD-FDD (1280)	2006, 1st quarter	-99
Burundi	516	4	90	14	14001	Global Ceasefire Agreement between Transitional Government and the Forces pour la defence de la democratie (CNDD-FDD)	51620031116	Government of Burundi	516	CNDD-FDD	1280	0	0	2003-11-16	2003-11-16	2008-11-16	1	2006-02-22	300	economic power-sharing: president installs CNDD/FDD supporters in a new team of directors at the head of the Office du Thé du Burundi (OTB), in a new government representatives on the board of the Société d'assurance du Burundi (SOCABU) and as new director for the Office national des télécommunications (ONATEL), most of whom were known CNDD-FDD supporters	CNDD-FDD (1280)	2006, 2nd quarter	-99
Burundi	516	4	90	14	14001	Global Ceasefire Agreement between Transitional Government and the Forces pour la defence de la democratie (CNDD-FDD)	51620031116	Government of Burundi	516	CNDD-FDD	1280	0	0	2003-11-16	2003-11-16	2008-11-16	1	2006-04-22	300	economic power-sharing: president installs CNDD/FDD supporters in the sugar parastatal the Société sucrière du Mosso (Sosumo), the brewery Brasserie et limonaderie du Burundi (Brarudi) and the near-bankrupt parastatal cotton manufacturer Coton et textiles du Burundi (Cotebu)	CNDD-FDD (1280)	2006, 2nd quarter	-99
Burundi	516	4	90	14	14001	Global Ceasefire Agreement between Transitional Government and the Forces pour la defence de la democratie (CNDD-FDD)	51620031116	Government of Burundi	516	CNDD-FDD	1280	0	0	2003-11-16	2003-11-16	2008-11-16	1	2006-09-13	100	change in cabinet, president Nkurunziza reshuffles his cabinet	CNDD-FDD (1280)	2006, 4th quarter	-99
Burundi	516	4	90	14	14001	Global Ceasefire Agreement between Transitional Government and the Forces pour la defence de la democratie (CNDD-FDD)	51620031116	Government of Burundi	516	CNDD-FDD	1280	0	0	2003-11-16	2003-11-16	2008-11-16	1	2006-09-13	104	New Minister Planning, Development & Reconstruction: Dieudonné Ngowembona (CNDD-FDD)	CNDD-FDD (1280)	2006, 4th quarter	-99
Burundi	516	4	90	14	14001	Global Ceasefire Agreement between Transitional Government and the Forces pour la defence de la democratie (CNDD-FDD)	51620031116	Government of Burundi	516	CNDD-FDD	1280	0	0	2003-11-16	2003-11-16	2008-11-16	1	2006-09-13	105	Old Minister Transport & Telecommunications: former minister Jean Bigirimana (CNDD-FDD) - new minister Marie Goreth Nizigama (Uprona)	CNDD-FDD (1280)	2006, 4th quarter	-99
Burundi	516	4	90	14	14001	Global Ceasefire Agreement between Transitional Government and the Forces pour la defence de la democratie (CNDD-FDD)	51620031116	Government of Burundi	516	CNDD-FDD	1280	0	0	2003-11-16	2003-11-16	2008-11-16	1	2007-07-13	100	change in cabinet, president Nkurunziza names a new government in a bid to restore parliamentary confidence in his much-battered administration	CNDD-FDD (1280)	2007, 3rd quarter	-99
Burundi	516	4	90	14	14001	Global Ceasefire Agreement between Transitional Government and the Forces pour la defence de la democratie (CNDD-FDD)	51620031116	Government of Burundi	516	CNDD-FDD	1280	0	0	2003-11-16	2003-11-16	2008-11-16	1	2007-07-13	104	New Minister of Human Rights & National Solidarity: Immaculée Nahayo (CNDD-FDD)	CNDD-FDD (1280)	2007, 3rd quarter	-99
Burundi	516	4	90	14	14001	Global Ceasefire Agreement between Transitional Government and the Forces pour la defence de la democratie (CNDD-FDD)	51620031116	Government of Burundi	516	CNDD-FDD	1280	0	0	2003-11-16	2003-11-16	2008-11-16	3	2007-09-15	508	subsequent peace agreement: Nkurunziza names a new government in mid-November, honouring a power-sharing agreement that he made with opposition parties in September; it remains unanswered if Uprona and Frodebu signed the original peace agreement	Government of Burundi (516), CNDD-FDD	2008, 1st quarter	-99
Burundi	516	4	90	14	14001	Global Ceasefire Agreement between Transitional Government and the Forces pour la defence de la democratie (CNDD-FDD)	51620031116	Government of Burundi	516	CNDD-FDD	1280	0	0	2003-11-16	2003-11-16	2008-11-16	1	2007-11-14	100	change in cabinet, Nkurunziza names a new government in mid-November, honouring a power-sharing agreement that he made with opposition parties in September	CNDD-FDD (1280)	2008, 1st quarter	date: Africa Research Bulletin 2007:11; 17296
Burundi	516	4	90	14	14001	Global Ceasefire Agreement between Transitional Government and the Forces pour la defence de la democratie (CNDD-FDD)	51620031116	Government of Burundi	516	CNDD-FDD	1280	0	0	2003-11-16	2003-11-16	2008-11-16	1	2007-11-14	103	Old Second Vice-President: Gabriel Ntisezerana (CNDD-FDD)	CNDD-FDD (1280)	2008, 1st quarter	date: Africa Research Bulletin 2007:11; 17296
Burundi	516	4	90	14	14001	Global Ceasefire Agreement between Transitional Government and the Forces pour la defence de la democratie (CNDD-FDD)	51620031116	Government of Burundi	516	CNDD-FDD	1280	0	0	2003-11-16	2003-11-16	2008-11-16	1	2007-11-14	103	Old Minister of Commerce & Industry: Denise Sinankwa (CNDD-FDD)	CNDD-FDD (1280)	2008, 1st quarter	date: Africa Research Bulletin 2007:11; 17296
Burundi	516	4	90	14	14001	Global Ceasefire Agreement between Transitional Government and the Forces pour la defence de la democratie (CNDD-FDD)	51620031116	Government of Burundi	516	CNDD-FDD	1280	0	0	2003-11-16	2003-11-16	2008-11-16	1	2007-11-14	104	New Minister Civil Services, Labour and Social Secuirty: Clotilde Niragira (CNDD-FDD)	CNDD-FDD (1280)	2008, 1st quarter	date: Africa Research Bulletin 2007:11; 17296
Burundi	516	4	90	14	14001	Global Ceasefire Agreement between Transitional Government and the Forces pour la defence de la democratie (CNDD-FDD)	51620031116	Government of Burundi	516	CNDD-FDD	1280	0	0	2003-11-16	2003-11-16	2008-11-16	1	2007-11-14	104	New Minister Public Security: Gen. Alain Guillaume Bunyoni (CNDD-FDD)	CNDD-FDD (1280)	2008, 1st quarter	date: Africa Research Bulletin 2007:11; 17296
Burundi	516	4	90	14	14001	Global Ceasefire Agreement between Transitional Government and the Forces pour la defence de la democratie (CNDD-FDD)	51620031116	Government of Burundi	516	CNDD-FDD	1280	0	0	2003-11-16	2003-11-16	2008-11-16	1	2007-11-14	105	Old Minister Planning, Development & Reconstruction: Dieudonné Ngowembona (CNDD-FDD)	CNDD-FDD (1280)	2008, 1st quarter	date: Africa Research Bulletin 2007:11; 17296
Burundi	516	4	90	14	14001	Global Ceasefire Agreement between Transitional Government and the Forces pour la defence de la democratie (CNDD-FDD)	51620031116	Government of Burundi	516	CNDD-FDD	1280	0	0	2003-11-16	2003-11-16	2008-11-16	1	2007-11-14	105	Old Minister of Transport & Telecommunications: Jean Bigirimana (CNDD-FDD); new Minister: Philppe Njoni (Opposition)	CNDD-FDD (1280)	2008, 1st quarter	date: Africa Research Bulletin 2007:11; 17296
Burundi	516	4	90	14	14001	Global Ceasefire Agreement between Transitional Government and the Forces pour la defence de la democratie (CNDD-FDD)	51620031116	Government of Burundi	516	CNDD-FDD	1280	0	0	2003-11-16	2003-11-16	2008-11-16	1	2007-11-14	105	Old Minister for Public Works and Equipment: Salvator Ntahomenyereye (FDD; CNDD-FDD); new Minister: Anatole Kanyenkiko (Opposition)	CNDD-FDD (1280)	2008, 1st quarter	date: Africa Research Bulletin 2007:11; 17296
Burundi	516	4	90	14	14001	Global Ceasefire Agreement between Transitional Government and the Forces pour la defence de la democratie (CNDD-FDD)	51620031116	Government of Burundi	516	CNDD-FDD	1280	0	0	2003-11-16	2003-11-16	2008-11-16	1	2008-11-16	2	end of 5-year period	-99	-99	UCDP
Burundi	516	4	90	15	15001	Comprehensive Ceasefire Agreement between the Government of Burundi and the Palipehutu-FNL	51620060907	Government of Burundi	516	Palipehutu-FNL	1278	0	0	2006-09-07	2006-09-07	2008-03-01	1	2006-09-07	1	PA signature	Government of Burundi (516), Palipehutu-FNL (1278)	-99	PSED_promises
Burundi	516	4	90	15	15001	Comprehensive Ceasefire Agreement between the Government of Burundi and the Palipehutu-FNL	51620060907	Government of Burundi	516	Palipehutu-FNL	1278	0	0	2006-09-07	2006-09-07	2008-03-01	1	2008-03-01	3	civil conflict recurrence	Government of Burundi (516), Palipehutu-FNL (1278)	-99	UCDP Termination
Rwanda	517	4	179	127	127001	Arusha Accords	51719930804	Government of Rwanda	517	RPF	1379	0	0	1993-08-04	1993-08-04	1993-08-31	1	1993-08-04	1	PA signature	Government of Rwanda (517), RPF (1379)	-99	PSED_promises
Rwanda	517	4	179	127	127001	Arusha Accords	51719930804	Government of Rwanda	517	RPF	1379	0	0	1993-08-04	1993-08-04	1993-08-31	3	1993-08-31	3	civil conflict recurrence	Government of Rwanda (517), RPF (1379)	-99	UCDP Encyclopedia
Somalia	520	4	141	208	208001	Addis Ababa Agreement	52019971222	Government of Somalia	520	SPM	1351	1	0	1993-03-27	1993-03-27	1993-06-05	1	1993-03-27	1	PA signature	Government of Somalia (520), SSDF (1349), SPM (1351), USC/SNA (1353)	-99	PSED_promises
Somalia	520	4	141	208	208001	Addis Ababa Agreement	52019971222	Government of Somalia	520	SPM	1351	1	0	1991-12-31	1993-03-27	1993-06-05	1	1993-06-05	3	civil conflict recurrence	Government of Somalia (520), SPM (1351)	-99	UCDP Encyclopedia
Somalia	520	4	141	209	209001	Addis Ababa Agreement	52019971222	Government of Somalia	520	SSDF	1349	1	0	1993-03-27	1993-03-27	1993-06-05	1	1993-03-27	1	PA signature	Government of Somalia (520), SSDF (1349), SPM (1351), USC/SNA (1353)	-99	PSED_promises
Somalia	520	4	141	209	209001	Addis Ababa Agreement	52019971222	Government of Somalia	520	SSDF	1349	1	0	1984-12-31	1993-03-27	1993-06-05	1	1993-06-05	3	civil conflict recurrence	Government of Somalia (520), SSDF (1349)	-99	UCDP Encyclopedia
Somalia	520	4	141	211	211001	Addis Ababa Agreement	52019971222	Government of Somalia	520	USC/SNA	1353	1	0	1993-03-27	1993-03-27	1993-06-05	1	1993-03-27	1	PA signature	Government of Somalia (520), SSDF (1349), SPM (1351), USC/SNA (1353)	-99	PSED_promises
Somalia	520	4	141	211	211001	Addis Ababa Agreement	52019971222	Government of Somalia	520	USC/SNA	1353	1	0	1993-03-27	1993-03-27	1993-06-05	1	1993-06-05	3	civil conflict recurrence	Government of Somalia (520), USC/SNA (1353)	-99	UCDP Encyclopedia
Somalia	520	4	141	211	211002	Nairobi Declaration on National Reconciliation	52019940324	Government of Somalia	520	USC/SNA	1353	0	1	1994-03-24	1994-03-24	1994-06-23	1	1994-03-24	1	PA signature	Government of Somalia (520), USC/SNA (1353)	-99	PSED_promises
Somalia	520	4	141	211	211002	Nairobi Declaration on National Reconciliation	52019940324	Government of Somalia	520	USC/SNA	1353	0	1	1994-03-24	1994-03-24	1994-06-23	1	1994-06-23	3	civil conflict recurrence	Government of Somalia (520), USC/SNA (1353)	-99	UCDP Encyclopedia, UCDP GED
Djibouti	522	4	184	43	43001	Agreement on Peace and National Reconciliation	52219941226	Government of Djibouti	522	FRUD	1382	0	0	1994-12-26	1994-12-26	1999-12-26	1	1994-12-26	1	PA signature	Government of Djibouti (522), FRUD (1382)	-99	PSED_promises
Djibouti	522	4	184	43	43001	Agreement on Peace and National Reconciliation	52219941226	Government of Djibouti	522	FRUD	1382	0	0	1994-12-26	1994-12-26	1999-12-26	3	1995-03-01	267	military integration: 300 combatants led by Ougoreh were formally integrated into the army	FRUD (1382)	1995, 2nd quarter	-99
Djibouti	522	4	184	43	43001	Agreement on Peace and National Reconciliation	52219941226	Government of Djibouti	522	FRUD	1382	0	0	1994-12-26	1994-12-26	1999-12-26	1	1995-06-08	100	political power-sharing: FRUD leaders (Ougoureh Kifle Ahmed, Ali Mohamed Daoud) join the government; this move fulfils conditions attached to the peace agreement	FRUD (1382)	1995, 3rd quarter	-99
Djibouti	522	4	184	43	43001	Agreement on Peace and National Reconciliation	52219941226	Government of Djibouti	522	FRUD	1382	0	0	1994-12-26	1994-12-26	1999-12-26	1	1995-06-08	104	political power-sharing: Ougoureh Kifle Ahmed (FRUD leader) becomes minister of agriculture and water projects	FRUD (1382)	1995, 3rd quarter	-99
Djibouti	522	4	184	43	43001	Agreement on Peace and National Reconciliation	52219941226	Government of Djibouti	522	FRUD	1382	0	0	1994-12-26	1994-12-26	1999-12-26	1	1995-06-08	104	political power-sharing: Ali Mohamed Daoud (FRUD leader) becomes minister of public health and social affairs	FRUD (1382)	1995, 3rd quarter	-99
Djibouti	522	4	184	43	43001	Agreement on Peace and National Reconciliation	52219941226	Government of Djibouti	522	FRUD	1382	0	0	1994-12-26	1994-12-26	1999-12-26	2	1995-10-30	267	military integration: integration of former FRUD combatants in the Djibouti army, with several dozen men promoted to officer and NCO rank	FRUD (1382)	-99	The Indian Ocean Newsletter, 04.11.1995
Djibouti	522	4	184	43	43001	Agreement on Peace and National Reconciliation	52219941226	Government of Djibouti	522	FRUD	1382	0	0	1994-12-26	1994-12-26	1999-12-26	1	1997-12-19	504	parliamentary election: joint lists presented by the ruling Rassemblement populaire pour le progres (RPP) and FRUD win all 65 seats in the national assembly, overall turnout officially put at 60%	-99	1998, 1st quarter	-99
Djibouti	522	4	184	43	43001	Agreement on Peace and National Reconciliation	52219941226	Government of Djibouti	522	FRUD	1382	0	0	1994-12-26	1994-12-26	1999-12-26	1	1997-12-28	100	political power-sharing: Ougoureh Kifle Ahmed (FRUD leader) moves from being minister of agriculture and water projects to minister of civil service and administrative reform	FRUD (1382)	1998, 1st quarter	-99
Djibouti	522	4	184	43	43001	Agreement on Peace and National Reconciliation	52219941226	Government of Djibouti	522	FRUD	1382	0	0	1994-12-26	1994-12-26	1999-12-26	1	1997-12-28	104	political power-sharing: Ougoureh Kifle Ahmed (FRUD leader) moves from being minister of agriculture and water projects to minister of civil service and administrative reform	FRUD (1382)	1998, 1st quarter	-99
Djibouti	522	4	184	43	43001	Agreement on Peace and National Reconciliation	52219941226	Government of Djibouti	522	FRUD	1382	0	0	1994-12-26	1994-12-26	1999-12-26	1	1997-12-28	105	political power-sharing: Ougoureh Kifle Ahmed (FRUD leader) moves from being minister of agriculture and water projects to minister of civil service and administrative reform	FRUD (1382)	1998, 1st quarter	-99
Djibouti	522	4	184	43	43001	Agreement on Peace and National Reconciliation	52219941226	Government of Djibouti	522	FRUD	1382	0	0	1994-12-26	1994-12-26	1999-12-26	1	1998-04-09	505	presidential elections: Ismael Omar Guelleh elected president, official turnout of 60% of the country's estimated 170,000 eligible voters, Ismael Omar Guelleh: 74.1% (RPP), Moussa Ahmed Idriss: 25.8% (Opposition djiboutienne unifiee) /// Guelleh, Djibouti people (Guelleh: nephew of the outgoing president, key power broker in Djibouti since the ageing Mr Aptidon fell ill in 1995, also credited as …	-99	1999, 2nd quarter	-99
Djibouti	522	4	184	43	43001	Agreement on Peace and National Reconciliation	52219941226	Government of Djibouti	522	FRUD	1382	0	0	1994-12-26	1994-12-26	1999-12-26	1	1999-05-12	100	political power-sharing: cabinett reshuffle brings Ougoureh Kifle Ahmed and Y (FRUD) senior cabinet positions; Ali Guelleh Abubaker (FRUD) is now chef de cabinet	FRUD (1382)	1999, 3rd quarter	-99
Djibouti	522	4	184	43	43001	Agreement on Peace and National Reconciliation	52219941226	Government of Djibouti	522	FRUD	1382	0	0	1994-12-26	1994-12-26	1999-12-26	1	1999-05-12	102	political power-sharing: cabinett reshuffle moves Ougoureh Kifle Ahmed (FRUD) from minister of civil service and administrative reform to minister of defence	FRUD (1382)	1999, 3rd quarter	-99
Djibouti	522	4	184	43	43001	Agreement on Peace and National Reconciliation	52219941226	Government of Djibouti	522	FRUD	1382	0	0	1994-12-26	1994-12-26	1999-12-26	1	1999-05-12	104	political power-sharing: cabinett reshuffle moves Ali Mohamed Daoud (FRUD) from minister of public health and social affairs to minister of agriculture and water resources [the EIU raw data confuses Ali Mohamed Daoud with Mohamed Ali Mohamed; the former did indeed change his cabinet position but it was the agriculture post; he left this post in 2001 (Africa Research Bulletin, 2001, 14477, 7)]	FRUD (1382)	1999, 3rd quarter	-99
Djibouti	522	4	184	43	43001	Agreement on Peace and National Reconciliation	52219941226	Government of Djibouti	522	FRUD	1382	0	0	1994-12-26	1994-12-26	1999-12-26	1	1999-05-12	104	political power-sharing: Ali Guelleh Abubaker (FRUD) is now chef de cabinet (non-cabinet position but influential advisory post, therefore coded as non-senior cabinet position)	FRUD (1382)	1999, 3rd quarter	-99
Djibouti	522	4	184	43	43001	Agreement on Peace and National Reconciliation	52219941226	Government of Djibouti	522	FRUD	1382	0	0	1994-12-26	1994-12-26	1999-12-26	1	1999-05-12	105	political power-sharing: cabinett reshuffle moves Ougoureh Kifle Ahmed (FRUD) from minister of civil service and administrative reform to minister of defence	FRUD (1382)	1999, 3rd quarter	-99
Djibouti	522	4	184	43	43001	Agreement on Peace and National Reconciliation	52219941226	Government of Djibouti	522	FRUD	1382	0	0	1994-12-26	1994-12-26	1999-12-26	1	1999-05-12	105	political power-sharing: cabinett reshuffle moves Ali Mohamed Daoud (FRUD) from minister of public health and social affairs to minister of agriculture and water resources	FRUD (1382)	1999, 3rd quarter	-99
Djibouti	522	4	184	43	43001	Agreement on Peace and National Reconciliation	52219941226	Government of Djibouti	522	FRUD	1382	0	0	1994-12-26	1994-12-26	1999-12-26	1	1999-12-26	2	end of 5-year period	-99	-99	UCDP
Djibouti	522	4	184	44	44001	General Agreement on Reform and Civil Concord	52220000207	Government of Djibouti	522	FRUD-AD	1383	0	0	1999-12-31	2000-02-07	2005-02-07	1	2000-02-07	1	PA signature	Government of Djibouti (522), FRUD-AD (1383)	-99	PSED_promises
Djibouti	522	4	184	44	44001	General Agreement on Reform and Civil Concord	52220000207	Government of Djibouti	522	FRUD-AD	1383	0	0	1999-12-31	2000-02-07	2005-02-07	1	2001-05-12	508	subsequent peace agreement: scrapping the controls on the establishment of legal political parties (currently restricted in number to four), establishing an independent electoral commission, allowing administrative and political decentralisation and providing for the full demobilisation and compensation of FRUD fighters, programme of reconstruction for the war-torn north is also outlined /// Djib…	Government of Djibouti (522), FRUD-AD (1383)	2001, 2nd quarter	-99
Djibouti	522	4	184	44	44001	General Agreement on Reform and Civil Concord	52220000207	Government of Djibouti	522	FRUD-AD	1383	0	0	1999-12-31	2000-02-07	2005-02-07	3	2001-07-01	100	political power-sharing: FRUD-AD rebels are included in the government	FRUD-AD (1383)	2001, 3rd quarter	-99
Djibouti	522	4	184	44	44001	General Agreement on Reform and Civil Concord	52220000207	Government of Djibouti	522	FRUD-AD	1383	0	0	1999-12-31	2000-02-07	2005-02-07	3	2001-07-01	102	political power-sharing: Ismael Ibrahim Houmed (FRUD-AD) becomes Minister of Justice and Penal and Muslim Affairs i/c of Human Rights	FRUD-AD (1383)	2001, 3rd quarter	-99
Djibouti	522	4	184	44	44001	General Agreement on Reform and Civil Concord	52220000207	Government of Djibouti	522	FRUD-AD	1383	0	0	1999-12-31	2000-02-07	2005-02-07	3	2001-07-01	104	political power-sharing: Otban Goita Moussa (FRUD-AD) becomes Minister of Youth, Sports, Leisure and Tourism	FRUD-AD (1383)	2001, 3rd quarter	-99
Djibouti	522	4	184	44	44001	General Agreement on Reform and Civil Concord	52220000207	Government of Djibouti	522	FRUD-AD	1383	0	0	1999-12-31	2000-02-07	2005-02-07	4	2002-03-16	267	military integration: 300 FRUD-Dini-combatants integrated into national army	FRUD-AD (1383)	-99	The Indian Ocean Newsletter, 16.03.2002
Djibouti	522	4	184	44	44001	General Agreement on Reform and Civil Concord	52220000207	Government of Djibouti	522	FRUD-AD	1383	0	0	1999-12-31	2000-02-07	2005-02-07	1	2003-01-10	504	parliamentary elections: coalition headed by the ruling Rassemblement populaire pour le progres (RPP), the Union pour la majorite presidentielle (UMP), won all seats, UMP: 62.2%, Union pour une alternance democratique (UAD, including FRUD-Dini): 36.9%, turnout: 48%	-99	2003, 1st quarter	-99
Djibouti	522	4	184	44	44001	General Agreement on Reform and Civil Concord	52220000207	Government of Djibouti	522	FRUD-AD	1383	0	0	1999-12-31	2000-02-07	2005-02-07	1	2005-02-07	2	end of 5-year period	-99	-99	UCDP
Angola	540	4	131	7	7001	Gbadolite Declaration on Angola	54019890622	Government of Angola	540	UNITA	1421	0	0	1989-06-22	1989-06-22	1989-08-24	1	1989-06-22	1	PA signature	Government of Angola (540), UNITA (1421)	-99	PSED_promises
Angola	540	4	131	7	7001	Gbadolite Declaration on Angola	54019890622	Government of Angola	540	UNITA	1421	0	0	1989-06-22	1989-06-22	1989-08-24	1	1989-08-24	3	civil conflict recurrence	Government of Angola (540), UNITA (1421)	-99	UCDP Encyclopedia
Angola	540	4	131	7	7002	Bicesse Agreement	54019910531	Government of Angola	540	UNITA	1421	0	1	1991-05-31	1991-05-31	1992-10-17	1	1991-05-31	1	PA signature	Government of Angola (540), UNITA (1421)	-99	PSED_promises
Angola	540	4	131	7	7002	Bicesse Agreement	54019910531	Government of Angola	540	UNITA	1421	0	1	1991-05-31	1991-05-31	1992-10-17	1	1991-11-01	500	proportional representation: law introduced	-99	-99	IPU PARLINE: http://www.ipu.org/parline-e/reports/2007_B.htm
Angola	540	4	131	7	7002	Bicesse Agreement	54019910531	Government of Angola	540	UNITA	1421	0	1	1991-05-31	1991-05-31	1992-10-17	1	1991-11-14	200	military power-sharing: former commander of UNITA is integrated into the national army command	UNITA (1421)	-99	BBC Summary of World Broadcasts, 16 November 1991
Angola	540	4	131	7	7002	Bicesse Agreement	54019910531	Government of Angola	540	UNITA	1421	0	1	1991-05-31	1991-05-31	1992-10-17	1	1992-03-31	267	military integration	UNITA (1421)	report No. 2, 1992, p8	-99
Angola	540	4	131	7	7002	Bicesse Agreement	54019910531	Government of Angola	540	UNITA	1421	0	1	1991-05-31	1991-05-31	1992-10-17	1	1992-04-22	267	military integration: 250 members of FALA (army of rebel group) are attending the training course for single national army	UNITA (1421)	-99	BBC Summary of World Broadcasts, 25 April 1992
Angola	540	4	131	7	7002	Bicesse Agreement	54019910531	Government of Angola	540	UNITA	1421	0	1	1991-05-31	1991-05-31	1992-10-17	1	1992-07-10	267	military integration: 40 former UNITA rebels are taking part in military training course	UNITA (1421)	-99	Xinhua General News Service, 10 July 1992
Angola	540	4	131	7	7002	Bicesse Agreement	54019910531	Government of Angola	540	UNITA	1421	0	1	1991-05-31	1991-05-31	1992-10-17	4	1992-08-06	267	military integration: 39 UNITA members integrated into police force	UNITA (1421)	-99	BBC Summary of World Broadcasts, 6 August 1992
Angola	540	4	131	7	7002	Bicesse Agreement	54019910531	Government of Angola	540	UNITA	1421	0	1	1991-05-31	1991-05-31	1992-10-17	1	1992-09-29	267	military integration: 8,800 soldiers had been integrated into the new Forces Armades de Angola (FAA)	UNITA (1421)	report No. 4, 1992, p12	-99
Angola	540	4	131	7	7002	Bicesse Agreement	54019910531	Government of Angola	540	UNITA	1421	0	1	1991-05-31	1991-05-31	1992-10-17	1	1992-09-30	504	parliamentary elections: MPLA: 129 seats (53,74%), UNITA: 70 seats (34,10%)		report No. 4, 1992, p10/13/14	-99
Angola	540	4	131	7	7002	Bicesse Agreement	54019910531	Government of Angola	540	UNITA	1421	0	1	1991-05-31	1991-05-31	1992-10-17	1	1992-09-30	505	presidential elections: Jose Eduardo dos Santos (MPLA): 49% of votes, Jonas Malheiro Savimbi (UNITA): 40% of votes [formally it was the first round and a second one was necessary; the second round, however, never took place and dos Santos remained president]		report No. 4, 1992, p10/13/14	-99
Angola	540	4	131	7	7002	Bicesse Agreement	54019910531	Government of Angola	540	UNITA	1421	0	1	1991-05-31	1991-05-31	1992-10-17	3	1992-10-01	267	military integration: 3,000 troops from UNITA were in Angolan Armed Forces training	UNITA (1421)	-99	The Associated Press, 8 October 1992
Angola	540	4	131	7	7002	Bicesse Agreement	54019910531	Government of Angola	540	UNITA	1421	0	1	1991-05-31	1991-05-31	1992-10-17	1	1992-10-05	201	military power-sharing: chief of General Staff of UNITA's Armed Forces (FALA), General Arlindo Chenda Ben-Ben, announced that his forces had pulled out of the AAF; PLUS: 11 Unita generals withdraw from the national army	UNITA (1421)	-99	BBC Summary of World Broadcasts, 7 October 1992
Angola	540	4	131	7	7002	Bicesse Agreement	54019910531	Government of Angola	540	UNITA	1421	0	1	1991-05-31	1991-05-31	1992-10-17	1	1992-10-17	3	civil conflict recurrence	Government of Angola (540), UNITA (1421)	-99	UCDP Encyclopedia
Angola	540	4	131	7	7003	Lusaka Protocol	54019941120	Government of Angola	540	UNITA	1421	0	1	1994-11-20	1994-11-20	1994-11-23	1	1994-11-20	1	PA signature	Government of Angola (540), UNITA (1421)	-99	PSED_promises
Angola	540	4	131	7	7003	Lusaka Protocol	54019941120	Government of Angola	540	UNITA	1421	0	1	1994-11-20	1994-11-20	1994-11-23	1	1994-11-23	3	civil conflict recurrence	Government of Angola (540), UNITA (1421)	-99	UCDP Encyclopedia, UCDP GED
Angola	540	4	131	7	7004	Memorandum of Understanding	54020020404	Government of Angola	540	UNITA	1421	0	1	2002-04-04	2002-04-04	2007-04-04	1	2002-04-04	1	PA signature	Government of Angola (540), UNITA (1421)	-99	PSED_promises
Angola	540	4	131	7	7004	Memorandum of Understanding	54020020404	Government of Angola	540	UNITA	1421	0	1	2002-04-04	2002-04-04	2007-04-04	1	2002-04-05	200	military power-sharing: at least 10 military chief from UNITA formally joint the FAA	UNITA (1421)	-99	Agence France Presse, 6 April 2002
Angola	540	4	131	7	7004	Memorandum of Understanding	54020020404	Government of Angola	540	UNITA	1421	0	1	2002-04-04	2002-04-04	2007-04-04	1	2002-07-15	267	military integration: 5,000 UNITA soliders have been inducted into the government army	UNITA (1421)	-99	Associated Press Worldstream, 15 July 2002
Angola	540	4	131	7	7004	Memorandum of Understanding	54020020404	Government of Angola	540	UNITA	1421	0	1	2002-04-04	2002-04-04	2007-04-04	1	2002-07-26	267	military integration: 700 UNITA soldiers started to be integrated into the AAF	UNITA (1421)	-99	BBC Summary of World Broadcasts, 27 July 2002
Angola	540	4	131	7	7004	Memorandum of Understanding	54020020404	Government of Angola	540	UNITA	1421	0	1	2002-04-04	2002-04-04	2007-04-04	1	2002-07-30	267	military integration: 732 UNITA soldiers were integrated into the AAF and national police	UNITA (1421)	-99	BBC Summary of World Broadcasts, 2 August 2002
Angola	540	4	131	7	7004	Memorandum of Understanding	54020020404	Government of Angola	540	UNITA	1421	0	1	2002-04-04	2002-04-04	2007-04-04	1	2002-07-31	267	military integration: 224 UNITA soldiers have been reintegrated into the AAF	UNITA (1421)	-99	BBC Summary of World Broadcasts, 2 August 2002
Angola	540	4	131	7	7004	Memorandum of Understanding	54020020404	Government of Angola	540	UNITA	1421	0	1	2002-04-04	2002-04-04	2007-04-04	1	2002-08-02	200	military power-sharing: 39 senior UNITA officers integrated into unified army	UNITA (1421)	-99	BBC Summary of World Broadcasts, 4 August 2002
Angola	540	4	131	7	7004	Memorandum of Understanding	54020020404	Government of Angola	540	UNITA	1421	0	1	2002-04-04	2002-04-04	2007-04-04	1	2002-09-06	267	military integration: 1,040 former UNITA members have beend attending the first training course for army corporals	UNITA (1421)	-99	BBC Summary of World Broadcasts, 10 September 2002
Angola	540	4	131	7	7004	Memorandum of Understanding	54020020404	Government of Angola	540	UNITA	1421	0	1	2002-04-04	2002-04-04	2007-04-04	1	2002-10-08	100	political power-sharing: with the re-unification of UNITA and UNITA-Renovada, the UNITA-Renovada minister posts are captured as political power-sharing between government and UNITA	UNITA (1421)	-99	World Markets Analysis, 9 October 2002
Angola	540	4	131	7	7004	Memorandum of Understanding	54020020404	Government of Angola	540	UNITA	1421	0	1	2002-04-04	2002-04-04	2007-04-04	1	2002-10-08	102	political power-sharing: Manuel Antonio Africano (UNITA/UNITA-Renovada) is geology & mines minister	UNITA (1421)	-99	World Markets Analysis, 9 October 2002
Angola	540	4	131	7	7004	Memorandum of Understanding	54020020404	Government of Angola	540	UNITA	1421	0	1	2002-04-04	2002-04-04	2007-04-04	1	2002-10-08	104	political power-sharing: Albertina Hamukuya (UNITA/UNITA-Renovada) is health minister	UNITA (1421)	-99	World Markets Analysis, 9 October 2002
Angola	540	4	131	7	7004	Memorandum of Understanding	54020020404	Government of Angola	540	UNITA	1421	0	1	2002-04-04	2002-04-04	2007-04-04	1	2002-10-08	104	political power-sharing: Jorge Alicerces Valentim (UNITA/UNITA-Renovada) is tourism minister	UNITA (1421)	-99	World Markets Analysis, 9 October 2002
Angola	540	4	131	7	7004	Memorandum of Understanding	54020020404	Government of Angola	540	UNITA	1421	0	1	2002-04-04	2002-04-04	2007-04-04	1	2002-10-08	104	political power-sharing: Vitorino Domingos Hossi (UNITA/UNITA-Renovada) is trade minister	UNITA (1421)	-99	World Markets Analysis, 9 October 2002
Angola	540	4	131	7	7004	Memorandum of Understanding	54020020404	Government of Angola	540	UNITA	1421	0	1	2002-04-04	2002-04-04	2007-04-04	4	2002-11-14	267	military integration: FFA have absorbed 5,000 soliders	UNITA (1421)	-99	Africa News, 14 November 2002
Angola	540	4	131	7	7004	Memorandum of Understanding	54020020404	Government of Angola	540	UNITA	1421	0	1	2002-04-04	2002-04-04	2007-04-04	4	2003-05-15	267	military integration: senior UNITA officers integrated into unified army (rawdata does not give any details); IMPORTANT: rebel officials get municipal post --> territorial power-sharing?	UNITA (1421)	May 2003, p16	-99
Angola	540	4	131	7	7004	Memorandum of Understanding	54020020404	Government of Angola	540	UNITA	1421	0	1	2002-04-04	2002-04-04	2007-04-04	1	2003-06-19	267	military integration: 5,007 ex UNITA soldiers drafted into national army	UNITA (1421)	-99	Africa News, 19 June 2003
Angola	540	4	131	7	7004	Memorandum of Understanding	54020020404	Government of Angola	540	UNITA	1421	0	1	2002-04-04	2002-04-04	2007-04-04	4	2003-08-15	267	military integration: 81,000 former soldiers have been incorporated into the army	UNITA (1421)	August 2003, p15	-99
Angola	540	4	131	7	7004	Memorandum of Understanding	54020020404	Government of Angola	540	UNITA	1421	0	1	2002-04-04	2002-04-04	2007-04-04	1	2003-10-19	267	military integration: at least 146 ex soliders of UNITA have concluded over the weekend the second phase of the professional training	UNITA (1421)	-99	Africa News, 21 October 2003
Angola	540	4	131	7	7004	Memorandum of Understanding	54020020404	Government of Angola	540	UNITA	1421	0	1	2002-04-04	2002-04-04	2007-04-04	1	2007-04-04	2	end of 5-year period	-99	-99	UCDP
Angola	540	4	192	191	191001	Memorandum of Understanding on Peace and National Reconciliation in Cabinda Province	54020060801	Government of Angola	540	FLEC-R	1392	0	0	2002-12-31	2006-08-01	2011-08-01	1	2006-08-01	1	PA signature	Government of Angola (540), FLEC-R (1392)	-99	PSED_promises
Angola	540	4	192	191	191001	Memorandum of Understanding on Peace and National Reconciliation in Cabinda Province	54020060801	Government of Angola	540	FLEC-R	1392	0	0	2002-12-31	2006-08-01	2011-08-01	1	2007-01-06	267	military integration: 615 former Cabinda soldiers were incoporated into the national army (FAA)	FLEC-R (1392)	March 2007, p18	-99
Angola	540	4	192	191	191001	Memorandum of Understanding on Peace and National Reconciliation in Cabinda Province	54020060801	Government of Angola	540	FLEC-R	1392	0	0	2002-12-31	2006-08-01	2011-08-01	1	2007-01-06	200	military power-sharing: "A ceremony on Saturday saw rebel leader Mauricio Amado Zulu, now a general in the Angolan army, declare the "formal dissolution" of the Liberation of Cabinda Enclave (Flec) as an armed movement."	FLEC-R (1392)	-99	Agence France Presse, 6 January 2007
Angola	540	4	192	191	191001	Memorandum of Understanding on Peace and National Reconciliation in Cabinda Province	54020060801	Government of Angola	540	FLEC-R	1392	0	0	2002-12-31	2006-08-01	2011-08-01	1	2007-01-08	267	military integration: 200 ex.FLEC start military training	FLEC-R (1392)	-99	Africa News, 9 January 2007
Angola	540	4	192	191	191001	Memorandum of Understanding on Peace and National Reconciliation in Cabinda Province	54020060801	Government of Angola	540	FLEC-R	1392	0	0	2002-12-31	2006-08-01	2011-08-01	1	2007-01-09	267	military integration: 147 ex-FLEC soldiers started a training course at the officers military school	FLEC-R (1392)	-99	Africa News, 10 January 2007
Angola	540	4	192	191	191001	Memorandum of Understanding on Peace and National Reconciliation in Cabinda Province	54020060801	Government of Angola	540	FLEC-R	1392	0	0	2002-12-31	2006-08-01	2011-08-01	1	2007-04-28	267	military integration: 275 former soldiers of Cabinda Independent FLEC ended	FLEC-R (1392)	-99	Africa News, 28 April 2007
Angola	540	4	192	191	191001	Memorandum of Understanding on Peace and National Reconciliation in Cabinda Province	54020060801	Government of Angola	540	FLEC-R	1392	0	0	2002-12-31	2006-08-01	2011-08-01	1	2007-08-01	402	territorial power-sharing: statute came into forces for Cabina granting a degree of political autonomy		September 2007, p14/15	-99
Angola	540	4	192	191	191001	Memorandum of Understanding on Peace and National Reconciliation in Cabinda Province	54020060801	Government of Angola	540	FLEC-R	1392	0	0	2002-12-31	2006-08-01	2011-08-01	3	2007-09-15	100	reshuffle of government: António Bento Bembe as minister without portfolio, José Bamoquina Zau as deputy interior minister, José Gualter dos Remédios Inocencio as deputy minister of petroleum	FLEC-R (1392)	October 2007, p9	-99
Angola	540	4	192	191	191001	Memorandum of Understanding on Peace and National Reconciliation in Cabinda Province	54020060801	Government of Angola	540	FLEC-R	1392	0	0	2002-12-31	2006-08-01	2011-08-01	3	2007-09-15	104	New Minister without Portfolio: António Bento Bembe (FLEC-R)	FLEC-R (1392)	October 2007, p9	-99
Angola	540	4	192	191	191001	Memorandum of Understanding on Peace and National Reconciliation in Cabinda Province	54020060801	Government of Angola	540	FLEC-R	1392	0	0	2002-12-31	2006-08-01	2011-08-01	4	2008-03-15	300	economic power-sharing: former FLEC-rebels take over state company	FLEC-R (1392)	March 2008, p10	-99
Angola	540	4	192	191	191001	Memorandum of Understanding on Peace and National Reconciliation in Cabinda Province	54020060801	Government of Angola	540	FLEC-R	1392	0	0	2002-12-31	2006-08-01	2011-08-01	1	2008-09-05	504	parliamentary elections: MPLA: 81,8% of votes, UNITA: 10,4% of votes	-99	September 2008, p10/11/12	-99
Angola	540	4	192	191	191001	Memorandum of Understanding on Peace and National Reconciliation in Cabinda Province	54020060801	Government of Angola	540	FLEC-R	1392	0	0	2002-12-31	2006-08-01	2011-08-01	1	2010-01-21	507	constitution: National Assembly approves a new constitution	-99	February 2010, p10	-99
Angola	540	4	192	191	191001	Memorandum of Understanding on Peace and National Reconciliation in Cabinda Province	54020060801	Government of Angola	540	FLEC-R	1392	0	0	2002-12-31	2006-08-01	2011-08-01	1	2011-08-01	2	end of 5-year period	-99	-99	UCDP
Mozambique	541	4	136	99	99001	Acordo Geral de Paz	54119921004	Government of Mozambique	541	Renamo	1347	0	1	1992-10-04	1992-10-04	1997-10-04	1	1992-10-04	1	PA signature	Government of Mozambique (541), Renamo (1347)	-99	PSED_promises
Mozambique	541	4	136	99	99001	Acordo Geral de Paz	54119921004	Government of Mozambique	541	Renamo	1347	0	1	1992-10-04	1992-10-04	1997-10-04	4	1993-10-08	267	military integration: Renamo rebels sent overdue troops to military retraining as agreed in peace accord / participate in military integration	Renamo (1347)	-99	Agence France Presse – English, 8 October 1993
Mozambique	541	4	136	99	99001	Acordo Geral de Paz	54119921004	Government of Mozambique	541	Renamo	1347	0	1	1992-10-04	1992-10-04	1997-10-04	1	1993-12-28	500	proportional representation: law is introduced	-99	-99	IPU PARLINE: http://www.ipu.org/parline-e/reports/2223_B.htm
Mozambique	541	4	136	99	99001	Acordo Geral de Paz	54119921004	Government of Mozambique	541	Renamo	1347	0	1	1992-10-04	1992-10-04	1997-10-04	1	1994-02-05	200	military power-sharing: High-level military integration: government and Renamo rebels each designate an officer to head Mozambican army jointly	Renamo (1347)	-99	The Indian Ocean Newsletter, 5 February 1994
Mozambique	541	4	136	99	99001	Acordo Geral de Paz	54119921004	Government of Mozambique	541	Renamo	1347	0	1	1992-10-04	1992-10-04	1997-10-04	1	1994-03-15	267	military integration: military integration takes place	Renamo (1347)	2nd quarter 1994, pg 9	-99
Mozambique	541	4	136	99	99001	Acordo Geral de Paz	54119921004	Government of Mozambique	541	Renamo	1347	0	1	1992-10-04	1992-10-04	1997-10-04	1	1994-07-11	267	military integration: joint army force is shapening	Renamo (1347)	3rd quarter 1994, pg 11	-99
Mozambique	541	4	136	99	99001	Acordo Geral de Paz	54119921004	Government of Mozambique	541	Renamo	1347	0	1	1992-10-04	1992-10-04	1997-10-04	3	1994-10-31	504	parliamentary elections: Frelimo won a slender eight-seat majority in the 250-seat Assembleia Nacional, taking 129 seats to Renamo's 112, with nine seats going to the three-party coalition known as the Democratic Union.	-99	1st quarter 1995, pg 9	-99
Mozambique	541	4	136	99	99001	Acordo Geral de Paz	54119921004	Government of Mozambique	541	Renamo	1347	0	1	1992-10-04	1992-10-04	1997-10-04	3	1994-10-31	505	presidential elections: Joaquim Chissano	-99	1st quarter 1995, pg 6	-99
Mozambique	541	4	136	99	99001	Acordo Geral de Paz	54119921004	Government of Mozambique	541	Renamo	1347	0	1	1992-10-04	1992-10-04	1997-10-04	1	1995-01-26	267	military integration: joint army force is too small yet	Renamo (1347)	1st quarter 1995, pg 11	-99
Mozambique	541	4	136	99	99001	Acordo Geral de Paz	54119921004	Government of Mozambique	541	Renamo	1347	0	1	1992-10-04	1992-10-04	1997-10-04	1	1997-10-04	2	end of 5-year period	-99	-99	UCDP
South Africa	560	4	150	558	558001	Interim Constitution	56019931118	Government of South Africa	560	ANC	1364	0	0	1988-12-31	1993-11-18	1998-11-18	1	1993-11-18	1	PA signature	Government of South Africa (560), ANC (1364)	-99	PSED_promises
South Africa	560	4	150	558	558001	Interim Constitution	56019931118	Government of South Africa	560	ANC	1364	0	0	1988-12-31	1993-11-18	1998-11-18	1	1994-01-26	267	military integration: 3,600 MK members and members of the Defence Forces of Transkei, Ciskei and Venda began their national peace force training	ANC (1364)	-99	BBC Summary of World Broadcasts, 26 January 1994
South Africa	560	4	150	558	558001	Interim Constitution	56019931118	Government of South Africa	560	ANC	1364	0	0	1988-12-31	1993-11-18	1998-11-18	1	1994-03-24	267	military integration: MK members have graduated from a 12-week course for platoon commanders at the Zimbabwe Military Academy	ANC (1364)	-99	BBC Summary of World Broadcasts, 28 March 1994
South Africa	560	4	150	558	558001	Interim Constitution	56019931118	Government of South Africa	560	ANC	1364	0	0	1988-12-31	1993-11-18	1998-11-18	1	1994-04-22	267	military integration: the integration of some 16,000 former guerillas of MK has been taking place since April 9	ANC (1364)	-99	The Indian Ocean Newsletter, 23 April 1994
South Africa	560	4	150	558	558001	Interim Constitution	56019931118	Government of South Africa	560	ANC	1364	0	0	1988-12-31	1993-11-18	1998-11-18	1	1994-04-27	504	parliamentary elections: ANC won 62.6% of the vote, followed by the outgoing ruling party, the NP, which received 20.4% of the vote. The thircd-largest party, the IFP, which decided to participate in the last minute, obtained 10.5% of the ballots cast. [EIU does not give the official date, data entry has been amended]	-99	2nd quarter 1994, p8	-99
South Africa	560	4	150	558	558001	Interim Constitution	56019931118	Government of South Africa	560	ANC	1364	0	0	1988-12-31	1993-11-18	1998-11-18	1	1994-05-10	100	political power-sharing: Nelson Mandela (ANC) is president	ANC (1364)	2nd quarter 1994, p9/10	-99
South Africa	560	4	150	558	558001	Interim Constitution	56019931118	Government of South Africa	560	ANC	1364	0	0	1988-12-31	1993-11-18	1998-11-18	1	1994-05-10	102	political power-sharing: Nelson Mandela (ANC) is president	ANC (1364)	2nd quarter 1994, p9/10	-99
South Africa	560	4	150	558	558001	Interim Constitution	56019931118	Government of South Africa	560	ANC	1364	0	0	1988-12-31	1993-11-18	1998-11-18	1	1994-05-10	102	political power-sharing: Thabo Mbeki (ANC) is First Vice-President	ANC (1364)	2nd quarter 1994, p9/10	-99
South Africa	560	4	150	558	558001	Interim Constitution	56019931118	Government of South Africa	560	ANC	1364	0	0	1988-12-31	1993-11-18	1998-11-18	1	1994-05-11	100	political power-sharing: government of national unity is established	ANC (1364)	2nd quarter 1994, p9/10	-99
South Africa	560	4	150	558	558001	Interim Constitution	56019931118	Government of South Africa	560	ANC	1364	0	0	1988-12-31	1993-11-18	1998-11-18	1	1994-05-11	102	political power-sharing: Joe Modise (ANC) is defence minister	ANC (1364)	2nd quarter 1994, p9/10	-99
South Africa	560	4	150	558	558001	Interim Constitution	56019931118	Government of South Africa	560	ANC	1364	0	0	1988-12-31	1993-11-18	1998-11-18	1	1994-05-11	102	political power-sharing: Dullah Omar (ANC) is justice minister	ANC (1364)	2nd quarter 1994, p9/10	-99
South Africa	560	4	150	558	558001	Interim Constitution	56019931118	Government of South Africa	560	ANC	1364	0	0	1988-12-31	1993-11-18	1998-11-18	1	1994-05-11	102	political power-sharing: Alfred Nzo (ANC) is foreign minister	ANC (1364)	2nd quarter 1994, p9/10	-99
South Africa	560	4	150	558	558001	Interim Constitution	56019931118	Government of South Africa	560	ANC	1364	0	0	1988-12-31	1993-11-18	1998-11-18	1	1994-05-11	102	political power-sharing: Trevor Manuel (ANC) is minister of trade and industry	ANC (1364)	2nd quarter 1994, p9/10	-99
South Africa	560	4	150	558	558001	Interim Constitution	56019931118	Government of South Africa	560	ANC	1364	0	0	1988-12-31	1993-11-18	1998-11-18	1	1994-05-11	104	political power-sharing: Zola Skweyiya (ANC) is minister of public service and administration	ANC (1364)	2nd quarter 1994, p9/10	-99
South Africa	560	4	150	558	558001	Interim Constitution	56019931118	Government of South Africa	560	ANC	1364	0	0	1988-12-31	1993-11-18	1998-11-18	1	1994-05-11	104	political power-sharing: Pallo Jordan (ANC) is minister of posts, telecommuncations and broadcasting	ANC (1364)	2nd quarter 1994, p9/10	-99
South Africa	560	4	150	558	558001	Interim Constitution	56019931118	Government of South Africa	560	ANC	1364	0	0	1988-12-31	1993-11-18	1998-11-18	1	1994-05-11	104	political power-sharing: Tito Mboweni (ANC) is labour minister	ANC (1364)	2nd quarter 1994, p9/10	-99
South Africa	560	4	150	558	558001	Interim Constitution	56019931118	Government of South Africa	560	ANC	1364	0	0	1988-12-31	1993-11-18	1998-11-18	1	1994-05-11	104	political power-sharing: Stella Sigcau (ANC) is minister of public enterprises	ANC (1364)	2nd quarter 1994, p9/10	-99
South Africa	560	4	150	558	558001	Interim Constitution	56019931118	Government of South Africa	560	ANC	1364	0	0	1988-12-31	1993-11-18	1998-11-18	1	1994-05-11	104	political power-sharing: Mac Maharaj (ANC) is minister of transport	ANC (1364)	2nd quarter 1994, p9/10	-99
South Africa	560	4	150	558	558001	Interim Constitution	56019931118	Government of South Africa	560	ANC	1364	0	0	1988-12-31	1993-11-18	1998-11-18	1	1994-05-11	104	political power-sharing: Jeff Radebe ANC) is minister of public works	ANC (1364)	2nd quarter 1994, p9/10	-99
South Africa	560	4	150	558	558001	Interim Constitution	56019931118	Government of South Africa	560	ANC	1364	0	0	1988-12-31	1993-11-18	1998-11-18	1	1994-05-11	104	political power-sharing: Derek Hanekom (ANC) is minister of land affairs	ANC (1364)	2nd quarter 1994, p9/10	-99
South Africa	560	4	150	558	558001	Interim Constitution	56019931118	Government of South Africa	560	ANC	1364	0	0	1988-12-31	1993-11-18	1998-11-18	1	1994-05-11	104	political power-sharing: Kader Asmal (ANC) is minister of water affairs and forestry	ANC (1364)	2nd quarter 1994, p9/10	-99
South Africa	560	4	150	558	558001	Interim Constitution	56019931118	Government of South Africa	560	ANC	1364	0	0	1988-12-31	1993-11-18	1998-11-18	1	1994-05-11	104	political power-sharing: Joe Slovo (ANC) is minister of housing and welfare	ANC (1364)	2nd quarter 1994, p9/10	-99
South Africa	560	4	150	558	558001	Interim Constitution	56019931118	Government of South Africa	560	ANC	1364	0	0	1988-12-31	1993-11-18	1998-11-18	1	1994-05-11	104	political power-sharing: Nkosazana Dlamini-Zuma (ANC) is minister of health	ANC (1364)	2nd quarter 1994, p9/10	-99
South Africa	560	4	150	558	558001	Interim Constitution	56019931118	Government of South Africa	560	ANC	1364	0	0	1988-12-31	1993-11-18	1998-11-18	1	1994-05-11	104	political power-sharing: Steve Tshwete (ANC) is minister of sports and recreation	ANC (1364)	2nd quarter 1994, p9/10	-99
South Africa	560	4	150	558	558001	Interim Constitution	56019931118	Government of South Africa	560	ANC	1364	0	0	1988-12-31	1993-11-18	1998-11-18	1	1994-05-18	267	military integration: training for 7,000 MK members to be integrated into National Defence Force	ANC (1364)	-99	BBC Summary of World Broadcasts, 20 May 1994
South Africa	560	4	150	558	558001	Interim Constitution	56019931118	Government of South Africa	560	ANC	1364	0	0	1988-12-31	1993-11-18	1998-11-18	1	1994-06-28	200	military power-sharing: seven former MK commanders were appointed to the National Defence Force	ANC (1364)	-99	BBC Summary of World Broadcasts, 30 June 1994
South Africa	560	4	150	558	558001	Interim Constitution	56019931118	Government of South Africa	560	ANC	1364	0	0	1988-12-31	1993-11-18	1998-11-18	4	1995-01-15	267	military integration: 7,000 former MK members were being processed into the National Army	ANC (1364)	-99	Defense & Foreign Affairs' Strategic Policy, January 1995
South Africa	560	4	150	558	558001	Interim Constitution	56019931118	Government of South Africa	560	ANC	1364	0	0	1988-12-31	1993-11-18	1998-11-18	1	1995-03-17	267	military integration: 290 former MK fighters admitted into South African army	ANC (1364)	-99	Agence France Presse, 17 March 1995
South Africa	560	4	150	558	558001	Interim Constitution	56019931118	Government of South Africa	560	ANC	1364	0	0	1988-12-31	1993-11-18	1998-11-18	1	1995-06-12	267	military integration: 10,500 former MK rebels have been appointed in the South African National Defence Force (SANDF)	ANC (1364)	-99	BBC Summary of World Broadcasts, 14 June 1995
South Africa	560	4	150	558	558001	Interim Constitution	56019931118	Government of South Africa	560	ANC	1364	0	0	1988-12-31	1993-11-18	1998-11-18	1	1995-10-06	267	military integration: 18,000 former MK soldiers integrated into army in 18 months	ANC (1364)	-99	BBC Summary of World Broadcasts, 10 December 1995
South Africa	560	4	150	558	558001	Interim Constitution	56019931118	Government of South Africa	560	ANC	1364	0	0	1988-12-31	1993-11-18	1998-11-18	1	1995-10-06	200	military power-sharing: 11 former MK guerillas appointed army generals	ANC (1364)	-99	BBC Summary of World Broadcasts, 9 October 1995
South Africa	560	4	150	558	558001	Interim Constitution	56019931118	Government of South Africa	560	ANC	1364	0	0	1988-12-31	1993-11-18	1998-11-18	4	1996-03-15	267	military integration: 20,000 former members of MK have been integrated into the South African Army	ANC (1364)	-99	Department of State Dispatch, March 1996
South Africa	560	4	150	558	558001	Interim Constitution	56019931118	Government of South Africa	560	ANC	1364	0	0	1988-12-31	1993-11-18	1998-11-18	1	1996-05-28	100	political power-sharing: Trevor Manuel (ANC) moves to ministry of finance; Alec Erwin (ANC) moves to ministry of trade and industry (already an ANC ministry)	ANC (1364)	2nd quarter 1996, p8/9	-99
South Africa	560	4	150	558	558001	Interim Constitution	56019931118	Government of South Africa	560	ANC	1364	0	0	1988-12-31	1993-11-18	1998-11-18	1	1996-05-28	102	political power-sharing: Trevor Manuel (ANC) moves to ministry of finance; Alec Erwin (ANC) moves to ministry of trade and industry (already an ANC ministry)	ANC (1364)	2nd quarter 1996, p8/9	-99
South Africa	560	4	150	558	558001	Interim Constitution	56019931118	Government of South Africa	560	ANC	1364	0	0	1988-12-31	1993-11-18	1998-11-18	1	1996-07-01	100	political power-sharing: NP withdraws from government of national unity; ANC fills posts	ANC (1364)	2nd quarter 1996, p10; 3rd quarter 1996, p2	-99
South Africa	560	4	150	558	558001	Interim Constitution	56019931118	Government of South Africa	560	ANC	1364	0	0	1988-12-31	1993-11-18	1998-11-18	1	1996-07-01	102	political power-sharing: Penuell Maduna (ANC) is minister of minerals and energy	ANC (1364)	2nd quarter 1996, p10; 3rd quarter 1996, p2	-99
South Africa	560	4	150	558	558001	Interim Constitution	56019931118	Government of South Africa	560	ANC	1364	0	0	1988-12-31	1993-11-18	1998-11-18	1	1996-07-01	104	political power-sharing: Valli Moosa (ANC) is minister of provincial affairs and constitutional development	ANC (1364)	2nd quarter 1996, p10; 3rd quarter 1996, p2	-99
South Africa	560	4	150	558	558001	Interim Constitution	56019931118	Government of South Africa	560	ANC	1364	0	0	1988-12-31	1993-11-18	1998-11-18	1	1996-07-01	104	political power-sharing: Pallo Jordan (ANC) is minister of environmental affairs and tourism	ANC (1364)	2nd quarter 1996, p10; 3rd quarter 1996, p2	-99
South Africa	560	4	150	558	558001	Interim Constitution	56019931118	Government of South Africa	560	ANC	1364	0	0	1988-12-31	1993-11-18	1998-11-18	1	1996-07-01	104	political power-sharing: Geraldine Fraser-Moleketi (ANC) is minister of welfare and population development	ANC (1364)	2nd quarter 1996, p10; 3rd quarter 1996, p2	-99
South Africa	560	4	150	558	558001	Interim Constitution	56019931118	Government of South Africa	560	ANC	1364	0	0	1988-12-31	1993-11-18	1998-11-18	1	1996-07-01	105	political power-sharing: ministry of post, telecommunications and broadcasting goes to Jay Naidoo (no party)	ANC (1364)	2nd quarter 1996, p10; 3rd quarter 1996, p2	-99
South Africa	560	4	150	558	558001	Interim Constitution	56019931118	Government of South Africa	560	ANC	1364	0	0	1988-12-31	1993-11-18	1998-11-18	1	1997-02-03	507	constitution: South Africa's new, permanent constitution came into force	-99	1st quarter 1997, p9	-99
South Africa	560	4	150	558	558001	Interim Constitution	56019931118	Government of South Africa	560	ANC	1364	0	0	1988-12-31	1993-11-18	1998-11-18	1	1998-11-18	2	end of 5-year period	-99	-99	UCDP
Comoros	581	4	213	35	35001	Famboni Declaration	58120000826	Government of Comoros	581	MPA/Republic of Anjouan	1397	0	0	1997-12-13	2000-08-26	2005-08-26	1	2000-08-26	1	PA signature	Government of Comoros (581), MPA/Republic of Anjouan (1397)	-99	PSED_promises
Comoros	581	4	213	35	35001	Famboni Declaration	58120000826	Government of Comoros	581	MPA/Republic of Anjouan	1397	0	0	1997-12-13	2000-08-26	2005-08-26	1	2001-02-17	508	subsequent peace agreement: nine Comorian political leaders, including the head-of-state, Colonel Azali Assoumane, the national opposition leader, Abbas Djoussouf, a former prime minister, the head of the Anjouan authorities, Colonel Said Abeid Abderemane, and the Moheli leader, Mohammed Fazuil, signed a framework agreement on national reconciliation in Comoros	Government of Comoros (581), MPA/Republic of Anjouan (1397)	2001, 2nd quarter	-99
Comoros	581	4	213	35	35001	Famboni Declaration	58120000826	Government of Comoros	581	MPA/Republic of Anjouan	1397	0	0	1997-12-13	2000-08-26	2005-08-26	1	2001-12-23	402	territorial power-sharing: autonomy introduced through the new constitution		2002, 1st quarter	-99
Comoros	581	4	213	35	35001	Famboni Declaration	58120000826	Government of Comoros	581	MPA/Republic of Anjouan	1397	0	0	1997-12-13	2000-08-26	2005-08-26	1	2001-12-23	506	referendum: on the draft constitution, turnout: 75.37%, approval	-99	2002, 1st quarter	-99
Comoros	581	4	213	35	35001	Famboni Declaration	58120000826	Government of Comoros	581	MPA/Republic of Anjouan	1397	0	0	1997-12-13	2000-08-26	2005-08-26	1	2001-12-23	507	constitution: new constitution enacted, approved by referendum	-99	2002, 1st quarter	-99
Comoros	581	4	213	35	35001	Famboni Declaration	58120000826	Government of Comoros	581	MPA/Republic of Anjouan	1397	0	0	1997-12-13	2000-08-26	2005-08-26	1	2002-01-20	100	political power-sharing: two leaders of the MPA/Republic of Anjouan join the transitional government	MPA/Republic of Anjouan (1397)	2002, 1st quarter	-99
Comoros	581	4	213	35	35001	Famboni Declaration	58120000826	Government of Comoros	581	MPA/Republic of Anjouan	1397	0	0	1997-12-13	2000-08-26	2005-08-26	1	2002-01-20	102	political power-sharing: Djaffar Salim (MPA/Republic of Anjouan) becomes deputy prime minister	MPA/Republic of Anjouan (1397)	2002, 1st quarter	-99
Comoros	581	4	213	35	35001	Famboni Declaration	58120000826	Government of Comoros	581	MPA/Republic of Anjouan	1397	0	0	1997-12-13	2000-08-26	2005-08-26	1	2002-01-20	102	political power-sharing: Halidi Charif (MPA/Republic of Anjouan) becomes minister of foreign affairs and co-operation	MPA/Republic of Anjouan (1397)	2002, 1st quarter	-99
Comoros	581	4	213	35	35001	Famboni Declaration	58120000826	Government of Comoros	581	MPA/Republic of Anjouan	1397	0	0	1997-12-13	2000-08-26	2005-08-26	1	2002-03-17	505	presidential elections (1st round)	-99	2002, 2nd quarter	-99
Comoros	581	4	213	35	35001	Famboni Declaration	58120000826	Government of Comoros	581	MPA/Republic of Anjouan	1397	0	0	1997-12-13	2000-08-26	2005-08-26	1	2002-04-14	505	presidential elections (2nd round): Colonel Azali Assoumane, former head of state who stepped down as president to contest the election, won an estimated 75% of the vote, turnout: ranging from 15% to 35%	-99	2002, 2nd quarter	-99
Comoros	581	4	213	35	35001	Famboni Declaration	58120000826	Government of Comoros	581	MPA/Republic of Anjouan	1397	0	0	1997-12-13	2000-08-26	2005-08-26	3	2002-06-01	100	political power-sharing: transitional government is abolished	MPA/Republic of Anjouan (1397)	2002, 3rd quarter	-99
Comoros	581	4	213	35	35001	Famboni Declaration	58120000826	Government of Comoros	581	MPA/Republic of Anjouan	1397	0	0	1997-12-13	2000-08-26	2005-08-26	3	2002-06-01	103	political power-sharing: Djaffar Salim (MPA/Republic of Anjouan) loses post as deputy prime minister	MPA/Republic of Anjouan (1397)	2002, 3rd quarter	-99
Comoros	581	4	213	35	35001	Famboni Declaration	58120000826	Government of Comoros	581	MPA/Republic of Anjouan	1397	0	0	1997-12-13	2000-08-26	2005-08-26	3	2002-06-01	103	political power-sharing: Halidi Charif (MPA/Republic of Anjouan) loses post as minister of foreign affairs and co-operation	MPA/Republic of Anjouan (1397)	2002, 3rd quarter	-99
Comoros	581	4	213	35	35001	Famboni Declaration	58120000826	Government of Comoros	581	MPA/Republic of Anjouan	1397	0	0	1997-12-13	2000-08-26	2005-08-26	3	2003-12-31	508	subsequent peace agreement: Beit-Salam agreement, the follow-up to the Fomboni Accord signed in 2001, was signed by the presidents of Grande Comore, Anjouan and Mohéli, and the union president, Azali Assoumane	Government of Comoros (581), MPA/Republic of Anjouan (1397)	2004, 1st quarter	-99
Comoros	581	4	213	35	35001	Famboni Declaration	58120000826	Government of Comoros	581	MPA/Republic of Anjouan	1397	0	0	1997-12-13	2000-08-26	2005-08-26	1	2004-04-18	504	parliamentary elections (1st round): loose alliance opposed to Colonel Assoumane won all but six of the 18 federal assembly seats, Convention pour la Renaissance des Comores (CRC), the party of the president, Azali Assoumane, won 6 [EIU does not give official date, date therefore amended]	-99	2004, 2nd quarter	-99
Comoros	581	4	213	35	35001	Famboni Declaration	58120000826	Government of Comoros	581	MPA/Republic of Anjouan	1397	0	0	1997-12-13	2000-08-26	2005-08-26	1	2004-04-25	504	parliamentary elections (2nd round): loose alliance opposed to Colonel Assoumane won all but six of the 18 federal assembly seats, Convention pour la Renaissance des Comores (CRC), the party of the president, Azali Assoumane, won 6 [EIU does not give official date, date therefore amended]	-99	2004, 2nd quarter	-99
Comoros	581	4	213	35	35001	Famboni Declaration	58120000826	Government of Comoros	581	MPA/Republic of Anjouan	1397	0	0	1997-12-13	2000-08-26	2005-08-26	3	2004-07-15	100	political power-sharing: Anjouan representative in government	MPA/Republic of Anjouan (1397)	2004, 3rd quarter	-99
Comoros	581	4	213	35	35001	Famboni Declaration	58120000826	Government of Comoros	581	MPA/Republic of Anjouan	1397	0	0	1997-12-13	2000-08-26	2005-08-26	3	2004-07-15	102	political power-sharing: Ahamadi Abdoul Bastoi (a representative chosen by Mohamed Bacar, the president of Anjouan) is the finance and budget minister	MPA/Republic of Anjouan (1397)	2004, 3rd quarter	-99
Comoros	581	4	213	35	35001	Famboni Declaration	58120000826	Government of Comoros	581	MPA/Republic of Anjouan	1397	0	0	1997-12-13	2000-08-26	2005-08-26	1	2005-07-05	100	political power-sharing: Anjouan representative not in government anymore	MPA/Republic of Anjouan (1397)	2005, 3rd quarter	-99
Comoros	581	4	213	35	35001	Famboni Declaration	58120000826	Government of Comoros	581	MPA/Republic of Anjouan	1397	0	0	1997-12-13	2000-08-26	2005-08-26	1	2005-07-05	103	political power-sharing: Ahamadi Abdoul Bastoi (a representative chosen by Mohamed Bacar, the president of Anjouan) loses his post as finance and budget minister	MPA/Republic of Anjouan (1397)	2005, 3rd quarter	-99
Comoros	581	4	213	35	35001	Famboni Declaration	58120000826	Government of Comoros	581	MPA/Republic of Anjouan	1397	0	0	1997-12-13	2000-08-26	2005-08-26	1	2005-08-26	2	end of 5-year period	-99	-99	UCDP
Sudan	625	4	113	641	641001	Comprehensive Peace Agreement (Sudan)	62520050109	Government of Sudan	625	SPLM/A	1312	0	1	2004-12-31	2005-01-09	2010-01-09	1	2005-01-09	1	PA signature	Government of Sudan (625), SPLM/A (1312)	-99	PSED_promises
Sudan	625	4	113	641	641001	Comprehensive Peace Agreement (Sudan)	62520050109	Government of Sudan	625	SPLM/A	1312	0	1	2004-12-31	2005-01-09	2010-01-09	1	2005-07-09	100	political power-sharing: John Garang (SPLM/A leader) becomes Vice-President of National Government	SPLM/A (1312)	June 2005; September, 2005	-99
Sudan	625	4	113	641	641001	Comprehensive Peace Agreement (Sudan)	62520050109	Government of Sudan	625	SPLM/A	1312	0	1	2004-12-31	2005-01-09	2010-01-09	1	2005-07-09	102	political power-sharing: John Garang (SPLM/A leader) becomes Vice-President of National Government	SPLM/A (1312)	June 2005; September, 2005	-99
Sudan	625	4	113	641	641001	Comprehensive Peace Agreement (Sudan)	62520050109	Government of Sudan	625	SPLM/A	1312	0	1	2004-12-31	2005-01-09	2010-01-09	3	2005-07-15	402	territorial power-sharing: Garang dissolves political apparatus of South Sudan and replaces governors put in place by central government with his own representatives		September, 2005	-99
Sudan	625	4	113	641	641001	Comprehensive Peace Agreement (Sudan)	62520050109	Government of Sudan	625	SPLM/A	1312	0	1	2004-12-31	2005-01-09	2010-01-09	3	2005-07-15	507	constitution: New (interim-)constitution enacted	-99	September, 2005	-99
Sudan	625	4	113	641	641001	Comprehensive Peace Agreement (Sudan)	62520050109	Government of Sudan	625	SPLM/A	1312	0	1	2004-12-31	2005-01-09	2010-01-09	3	2005-08-31	121	political power-sharing (rebel group quota in parliament): New parliament is formed, according to power sharing quota agreed upon in CPA (NC: 52%, SPLM: 28%, Other: 20%).	SPLM/A (1312)	December 2005	-99
Sudan	625	4	113	641	641001	Comprehensive Peace Agreement (Sudan)	62520050109	Government of Sudan	625	SPLM/A	1312	0	1	2004-12-31	2005-01-09	2010-01-09	1	2005-09-21	100	political power-sharing: government of national unity is established	SPLM/A (1312)	December 2005	-99
Sudan	625	4	113	641	641001	Comprehensive Peace Agreement (Sudan)	62520050109	Government of Sudan	625	SPLM/A	1312	0	1	2004-12-31	2005-01-09	2010-01-09	1	2005-09-21	102	political power-sharing: Lam Akok Ajawin (SPLM) is minister of foreign affairs	SPLM/A (1312)	December 2005	-99
Sudan	625	4	113	641	641001	Comprehensive Peace Agreement (Sudan)	62520050109	Government of Sudan	625	SPLM/A	1312	0	1	2004-12-31	2005-01-09	2010-01-09	1	2005-09-21	104	political power-sharing: George Boreng Niyami (SPLM) is minister of foreign trade	SPLM/A (1312)	December 2005	-99
Sudan	625	4	113	641	641001	Comprehensive Peace Agreement (Sudan)	62520050109	Government of Sudan	625	SPLM/A	1312	0	1	2004-12-31	2005-01-09	2010-01-09	1	2005-09-21	104	political power-sharing: Malek Agar Ayar (SPLM) is minister of investment	SPLM/A (1312)	December 2005	-99
Sudan	625	4	113	641	641001	Comprehensive Peace Agreement (Sudan)	62520050109	Government of Sudan	625	SPLM/A	1312	0	1	2004-12-31	2005-01-09	2010-01-09	1	2005-09-21	104	political power-sharing: Deng Alor Kol (SPLM) is minister of cabinet affairs	SPLM/A (1312)	December 2005	-99
Sudan	625	4	113	641	641001	Comprehensive Peace Agreement (Sudan)	62520050109	Government of Sudan	625	SPLM/A	1312	0	1	2004-12-31	2005-01-09	2010-01-09	1	2005-09-21	104	political power-sharing: Paul Mithanq (SPLM) is minister of education	SPLM/A (1312)	December 2005	-99
Sudan	625	4	113	641	641001	Comprehensive Peace Agreement (Sudan)	62520050109	Government of Sudan	625	SPLM/A	1312	0	1	2004-12-31	2005-01-09	2010-01-09	1	2005-09-21	104	political power-sharing: Peter Niyot Kok (SPLM) is minister of higher education	SPLM/A (1312)	December 2005	-99
Sudan	625	4	113	641	641001	Comprehensive Peace Agreement (Sudan)	62520050109	Government of Sudan	625	SPLM/A	1312	0	1	2004-12-31	2005-01-09	2010-01-09	1	2005-09-21	104	political power-sharing: Kuwal Maniang Ajok (SPLM) is minister of transport	SPLM/A (1312)	December 2005	-99
Sudan	625	4	113	641	641001	Comprehensive Peace Agreement (Sudan)	62520050109	Government of Sudan	625	SPLM/A	1312	0	1	2004-12-31	2005-01-09	2010-01-09	1	2005-09-21	104	political power-sharing: Tabita Sokaya (SPLM) is minister of health	SPLM/A (1312)	December 2005	-99
Sudan	625	4	113	641	641001	Comprehensive Peace Agreement (Sudan)	62520050109	Government of Sudan	625	SPLM/A	1312	0	1	2004-12-31	2005-01-09	2010-01-09	1	2005-09-21	104	political power-sharing: Kosti Manili (SPLM) is minister of humanitarian affairs	SPLM/A (1312)	December 2005	-99
Sudan	625	4	113	641	641001	Comprehensive Peace Agreement (Sudan)	62520050109	Government of Sudan	625	SPLM/A	1312	0	1	2004-12-31	2005-01-09	2010-01-09	3	2005-10-15	302	economic power-sharing: National Petroleum Commission formed with seats for SPLM representatives /// SPLM, NCP (SPLM with narrow majority)	SPLM/A (1312)	December 2005; June 2006	-99
Sudan	625	4	113	641	641001	Comprehensive Peace Agreement (Sudan)	62520050109	Government of Sudan	625	SPLM/A	1312	0	1	2004-12-31	2005-01-09	2010-01-09	4	2005-12-15	267	military integration: first 1500 of SPLA troops to form part of Joint Integrated Unit (JIU) in Khartoum	SPLM/A (1312)	December 2005	-99
Sudan	625	4	113	641	641001	Comprehensive Peace Agreement (Sudan)	62520050109	Government of Sudan	625	SPLM/A	1312	0	1	2004-12-31	2005-01-09	2010-01-09	4	2005-12-15	200	military power-sharing: under shared SAF and SPLA command, first 1500 of SPLA troops to form part of Joint Integrated Unit (JIU) in Khartoum	SPLM/A (1312)	December 2005	-99
Sudan	625	4	113	641	641001	Comprehensive Peace Agreement (Sudan)	62520050109	Government of Sudan	625	SPLM/A	1312	0	1	2004-12-31	2005-01-09	2010-01-09	1	2007-10-11	100	political power-sharing: SPLM suspends its participation in the government of national unity	SPLM/A (1312)	November, 2007	-99
Sudan	625	4	113	641	641001	Comprehensive Peace Agreement (Sudan)	62520050109	Government of Sudan	625	SPLM/A	1312	0	1	2004-12-31	2005-01-09	2010-01-09	1	2007-10-11	103	political power-sharing: Lam Akok Ajawin (SPLM) resigns as minister of foreign affairs	SPLM/A (1312)	November, 2007	-99
Sudan	625	4	113	641	641001	Comprehensive Peace Agreement (Sudan)	62520050109	Government of Sudan	625	SPLM/A	1312	0	1	2004-12-31	2005-01-09	2010-01-09	1	2007-10-11	105	political power-sharing: George Boreng Niyami (SPLM) resigns as minister of foreign trade	SPLM/A (1312)	November, 2007	-99
Sudan	625	4	113	641	641001	Comprehensive Peace Agreement (Sudan)	62520050109	Government of Sudan	625	SPLM/A	1312	0	1	2004-12-31	2005-01-09	2010-01-09	1	2007-10-11	105	political power-sharing: Malek Agar Ayar (SPLM) resigns as minister of investment	SPLM/A (1312)	November, 2007	-99
Sudan	625	4	113	641	641001	Comprehensive Peace Agreement (Sudan)	62520050109	Government of Sudan	625	SPLM/A	1312	0	1	2004-12-31	2005-01-09	2010-01-09	1	2007-10-11	105	political power-sharing: Deng Alor Kol (SPLM) resigns as minister of cabinet affairs	SPLM/A (1312)	November, 2007	-99
Sudan	625	4	113	641	641001	Comprehensive Peace Agreement (Sudan)	62520050109	Government of Sudan	625	SPLM/A	1312	0	1	2004-12-31	2005-01-09	2010-01-09	1	2007-10-11	105	political power-sharing: Paul Mithanq (SPLM) resigns as minister of education	SPLM/A (1312)	November, 2007	-99
Sudan	625	4	113	641	641001	Comprehensive Peace Agreement (Sudan)	62520050109	Government of Sudan	625	SPLM/A	1312	0	1	2004-12-31	2005-01-09	2010-01-09	1	2007-10-11	105	political power-sharing: Peter Niyot Kok (SPLM) resigns as minister of higher education	SPLM/A (1312)	November, 2007	-99
Sudan	625	4	113	641	641001	Comprehensive Peace Agreement (Sudan)	62520050109	Government of Sudan	625	SPLM/A	1312	0	1	2004-12-31	2005-01-09	2010-01-09	1	2007-10-11	105	political power-sharing: Kuwal Maniang Ajok (SPLM) resigns as minister of transport	SPLM/A (1312)	November, 2007	-99
Sudan	625	4	113	641	641001	Comprehensive Peace Agreement (Sudan)	62520050109	Government of Sudan	625	SPLM/A	1312	0	1	2004-12-31	2005-01-09	2010-01-09	1	2007-10-11	105	political power-sharing: Tabita Sokaya (SPLM) resigns as minister of health	SPLM/A (1312)	November, 2007	-99
Sudan	625	4	113	641	641001	Comprehensive Peace Agreement (Sudan)	62520050109	Government of Sudan	625	SPLM/A	1312	0	1	2004-12-31	2005-01-09	2010-01-09	1	2007-10-11	105	political power-sharing: Kosti Manili (SPLM) resigns as minister of humanitarian affairs	SPLM/A (1312)	November, 2007	-99
Sudan	625	4	113	641	641001	Comprehensive Peace Agreement (Sudan)	62520050109	Government of Sudan	625	SPLM/A	1312	0	1	2004-12-31	2005-01-09	2010-01-09	1	2007-12-27	100	political power-sharing: new government of national unity	SPLM/A (1312)	-99	Africa Research Bulletin, 2007, 17340, 12 (follow-up search)
Sudan	625	4	113	641	641001	Comprehensive Peace Agreement (Sudan)	62520050109	Government of Sudan	625	SPLM/A	1312	0	1	2004-12-31	2005-01-09	2010-01-09	1	2007-12-27	102	political power-sharing: Deng Alor Kwal (SPLM) is minister of foreign affairs	SPLM/A (1312)	-99	Africa Research Bulletin, 2007, 17340, 12 (follow-up search)
Sudan	625	4	113	641	641001	Comprehensive Peace Agreement (Sudan)	62520050109	Government of Sudan	625	SPLM/A	1312	0	1	2004-12-31	2005-01-09	2010-01-09	1	2007-12-27	104	political power-sharing: Pagan Amum Okiech (SPLM) is minister of cabinet affairs	SPLM/A (1312)	-99	Africa Research Bulletin, 2007, 17340, 12 (follow-up search)
Sudan	625	4	113	641	641001	Comprehensive Peace Agreement (Sudan)	62520050109	Government of Sudan	625	SPLM/A	1312	0	1	2004-12-31	2005-01-09	2010-01-09	1	2007-12-27	104	political power-sharing: James Kol Rona (SPLM) is minister of foreign trade	SPLM/A (1312)	-99	Africa Research Bulletin, 2007, 17340, 12 (follow-up search)
Sudan	625	4	113	641	641001	Comprehensive Peace Agreement (Sudan)	62520050109	Government of Sudan	625	SPLM/A	1312	0	1	2004-12-31	2005-01-09	2010-01-09	1	2007-12-27	104	political power-sharing: Tabita Sawkaya (f) (SPLM) is minister of health	SPLM/A (1312)	-99	Africa Research Bulletin, 2007, 17340, 12 (follow-up search)
Sudan	625	4	113	641	641001	Comprehensive Peace Agreement (Sudan)	62520050109	Government of Sudan	625	SPLM/A	1312	0	1	2004-12-31	2005-01-09	2010-01-09	1	2007-12-27	104	political power-sharing: Dr George Bornik Nyami (SPLM) is minister of health	SPLM/A (1312)	-99	Africa Research Bulletin, 2007, 17340, 12 (follow-up search)
Sudan	625	4	113	641	641001	Comprehensive Peace Agreement (Sudan)	62520050109	Government of Sudan	625	SPLM/A	1312	0	1	2004-12-31	2005-01-09	2010-01-09	1	2007-12-27	104	political power-sharing: Dr Harun Run Lual (SPLM) is minister of humanitarian affairs	SPLM/A (1312)	-99	Africa Research Bulletin, 2007, 17340, 12 (follow-up search)
Sudan	625	4	113	641	641001	Comprehensive Peace Agreement (Sudan)	62520050109	Government of Sudan	625	SPLM/A	1312	0	1	2004-12-31	2005-01-09	2010-01-09	1	2007-12-27	104	political power-sharing: Kosti Mabibe (SPLM) is minister of investment	SPLM/A (1312)	-99	Africa Research Bulletin, 2007, 17340, 12 (follow-up search)
Sudan	625	4	113	641	641001	Comprehensive Peace Agreement (Sudan)	62520050109	Government of Sudan	625	SPLM/A	1312	0	1	2004-12-31	2005-01-09	2010-01-09	1	2007-12-27	104	political power-sharing: Philip Thon Leek (SPLM) is minister of transport, road and bridges	SPLM/A (1312)	-99	Africa Research Bulletin, 2007, 17340, 12 (follow-up search)
Sudan	625	4	113	641	641001	Comprehensive Peace Agreement (Sudan)	62520050109	Government of Sudan	625	SPLM/A	1312	0	1	2004-12-31	2005-01-09	2010-01-09	1	2008-06-09	508	subsequent peace agreement: after clashes government and SPLM agree on roadmap to solve crisis over longterm-disputed Abyei area.	Government of Sudan (625), SPLM/A (1312)	June 2008	-99
Sudan	625	4	113	641	641001	Comprehensive Peace Agreement (Sudan)	62520050109	Government of Sudan	625	SPLM/A	1312	0	1	2004-12-31	2005-01-09	2010-01-09	1	2008-07-07	500	proportional representation: Partial proportional representation is introduced. 40% of parliament seats are elected by PR.	-99	July 2008	-99
Sudan	625	4	113	641	641001	Comprehensive Peace Agreement (Sudan)	62520050109	Government of Sudan	625	SPLM/A	1312	0	1	2004-12-31	2005-01-09	2010-01-09	1	2009-12-29	508	subsequent peace agreement: referendum law is passed defining procedures concerning the self determination referendum of South Sudan. NC pushed its preferred version through parliament, but conceded to take the negotiated version after heavy SPLM and US pressure.	Government of Sudan (625), SPLM/A (1312)	January 2010	-99
Sudan	625	4	113	641	641001	Comprehensive Peace Agreement (Sudan)	62520050109	Government of Sudan	625	SPLM/A	1312	0	1	2004-12-31	2005-01-09	2010-01-09	1	2010-01-09	2	end of 5-year period	-99	-99	UCDP
Sudan	625	4	113	645	645001	Cairo Agreement	62520050618	Government of Sudan	625	NDA	1314	0	0	2001-12-31	2005-06-18	2010-06-18	1	2005-06-18	1	PA signature	Government of Sudan (625), NDA (1314)	-99	PSED_promises
Sudan	625	4	113	645	645001	Cairo Agreement	62520050618	Government of Sudan	625	NDA	1314	0	0	2001-12-31	2005-06-18	2010-06-18	3	2005-07-15	507	constitution: New (interim-)constitution enacted	-99	September, 2005	-99
Sudan	625	4	113	645	645001	Cairo Agreement	62520050618	Government of Sudan	625	NDA	1314	0	0	2001-12-31	2005-06-18	2010-06-18	3	2005-08-31	121	political power-sharing (rebel group quota in parliament): New parliament is formed, according to power sharing quota agreed upon in CPA (NC: 52%, SPLM: 28%, Other: 20%). [MO: the term "others" include the Umma Party, Democratic Unionist Party and the Sudanese Communist Party which are all members of the NDA]	NDA (1314)	December 2005	-99
Sudan	625	4	113	645	645001	Cairo Agreement	62520050618	Government of Sudan	625	NDA	1314	0	0	2001-12-31	2005-06-18	2010-06-18	4	2006-12-15	100	political power-sharing: NDA takes up two positions in the government of national unity	NDA (1314)	September, 2006; December 2006	-99
Sudan	625	4	113	645	645001	Cairo Agreement	62520050618	Government of Sudan	625	NDA	1314	0	0	2001-12-31	2005-06-18	2010-06-18	4	2006-12-15	104	political power-sharing: Hamid Mohamed Ibrahim (NDA) is minister of education	NDA (1314)	September, 2006; December 2006	-99
Sudan	625	4	113	645	645001	Cairo Agreement	62520050618	Government of Sudan	625	NDA	1314	0	0	2001-12-31	2005-06-18	2010-06-18	4	2006-12-15	104	political power-sharing: Abdelrahman Saeed (NDA) is minister of science and technology	NDA (1314)	September, 2006; December 2006	-99
Sudan	625	4	113	645	645001	Cairo Agreement	62520050618	Government of Sudan	625	NDA	1314	0	0	2001-12-31	2005-06-18	2010-06-18	4	2008-01-15	100	political power-sharing: NDA changes ministry	NDA (1314)	December 2007; January 2008; February 2008	-99
Sudan	625	4	113	645	645001	Cairo Agreement	62520050618	Government of Sudan	625	NDA	1314	0	0	2001-12-31	2005-06-18	2010-06-18	4	2008-01-15	104	political power-sharing: Abdelrahman Saeed (NDA) is now minister of federal relations	NDA (1314)	December 2007; January 2008; February 2008	-99
Sudan	625	4	113	645	645001	Cairo Agreement	62520050618	Government of Sudan	625	NDA	1314	0	0	2001-12-31	2005-06-18	2010-06-18	4	2008-01-15	105	political power-sharing: Abdelrahman Saeed (NDA) is not minister of science and technology anymore	NDA (1314)	December 2007; January 2008; February 2008	-99
Sudan	625	4	113	645	645001	Cairo Agreement	62520050618	Government of Sudan	625	NDA	1314	0	0	2001-12-31	2005-06-18	2010-06-18	1	2008-07-07	500	proportional representation: President ratifies election law. Partial proportional representation is introduced. 40% of parliament seats are elected by PR.	-99	July 2008	-99
Sudan	625	4	113	645	645001	Cairo Agreement	62520050618	Government of Sudan	625	NDA	1314	0	0	2001-12-31	2005-06-18	2010-06-18	1	2010-04-15	122	political power-sharing (rebel group quota in parliament): Power-sharing quota for legislative seats according to party membership gone, quotas for women and seats to be given by proportional representation not gone [MO: election date is used as edate]	NDA (1314)	May 2010	-99
Sudan	625	4	113	645	645001	Cairo Agreement	62520050618	Government of Sudan	625	NDA	1314	0	0	2001-12-31	2005-06-18	2010-06-18	1	2010-04-15	504	parliamentary elections: NCP and SPLM win biggest share of vote in North and South, respectively	-99	May 2010	-99
Sudan	625	4	113	645	645001	Cairo Agreement	62520050618	Government of Sudan	625	NDA	1314	0	0	2001-12-31	2005-06-18	2010-06-18	1	2010-04-15	505	presidential elections: President Bashir wins national presidential elections	-99	May 2010	-99
Sudan	625	4	113	645	645001	Cairo Agreement	62520050618	Government of Sudan	625	NDA	1314	0	0	2001-12-31	2005-06-18	2010-06-18	1	2010-06-14	100	political power-sharing: NDA is not in government anymore	NDA (1314)	July 2010	-99
Sudan	625	4	113	645	645001	Cairo Agreement	62520050618	Government of Sudan	625	NDA	1314	0	0	2001-12-31	2005-06-18	2010-06-18	1	2010-06-14	105	political power-sharing: Abdelrahman Saeed (NDA) is not minister of federal relations anymore	NDA (1314)	July 2010	-99
Sudan	625	4	113	645	645001	Cairo Agreement	62520050618	Government of Sudan	625	NDA	1314	0	0	2001-12-31	2005-06-18	2010-06-18	1	2010-06-14	105	political power-sharing: Hamid Mohamed Ibrahim (NDA) is not minister of education anymore	NDA (1314)	July 2010	-99
Sudan	625	4	113	645	645001	Cairo Agreement	62520050618	Government of Sudan	625	NDA	1314	0	0	2001-12-31	2005-06-18	2010-06-18	1	2010-06-18	2	end of 5-year period	-99	-99	UCDP
Sudan	625	4	113	631	631001	Dafur Peace Agreement	62520060505	Government of Sudan	625	SLM/A-Minni Minawi	1318	0	0	2006-05-05	2006-05-05	2011-05-05	1	2006-05-05	1	PA signature	Government of Sudan (625), SLM/A-Minni Minawi (1318)	-99	PSED_promises
Sudan	625	4	113	631	631001	Dafur Peace Agreement	62520060505	Government of Sudan	625	SLM/A-Minni Minawi	1318	0	0	2006-05-05	2006-05-05	2011-05-05	3	2006-08-15	100	political power-sharing: Minni Minawi (SLM/A-MM) becomes Senior Assistent to President Al-Bashir President	SLM/A-Minni Minawi (1318)	September, 2006	-99
Sudan	625	4	113	631	631001	Dafur Peace Agreement	62520060505	Government of Sudan	625	SLM/A-Minni Minawi	1318	0	0	2006-05-05	2006-05-05	2011-05-05	3	2006-08-15	104	political power-sharing: Minni Minawi (SLM/A-MM) becomes Senior Assistent to President Al-Bashir President	SLM/A-Minni Minawi (1318)	September, 2006	-99
Sudan	625	4	113	631	631001	Dafur Peace Agreement	62520060505	Government of Sudan	625	SLM/A-Minni Minawi	1318	0	0	2006-05-05	2006-05-05	2011-05-05	1	2006-09-27	400	territorial power-sharing: Transitional Dafur Regional Authority is introduced by presidential decree		-99	Xinhua General News Service, 27.09.2006
Sudan	625	4	113	631	631001	Dafur Peace Agreement	62520060505	Government of Sudan	625	SLM/A-Minni Minawi	1318	0	0	2006-05-05	2006-05-05	2011-05-05	1	2008-07-07	500	proportional representation: President ratifies election law. Partial proportional representation is introduced. 40% of parliament seats are elected by PR.	-99	July 2008	-99
Sudan	625	4	113	631	631001	Dafur Peace Agreement	62520060505	Government of Sudan	625	SLM/A-Minni Minawi	1318	0	0	2006-05-05	2006-05-05	2011-05-05	1	2009-11-11	267	military integration: after long-time resistance against integration, 75 people from sla-mm get integrated into national forces as a necessity for slm-mm participation in national elections	SLM/A-Minni Minawi (1318)	-99	Sudan Tribune, 12.11.2009
Sudan	625	4	113	631	631001	Dafur Peace Agreement	62520060505	Government of Sudan	625	SLM/A-Minni Minawi	1318	0	0	2006-05-05	2006-05-05	2011-05-05	1	2010-04-15	504	parliamentary elections: NCP and SPLM win biggest share of vote in North and South, respectively	-99	May 2010	-99
Sudan	625	4	113	631	631001	Dafur Peace Agreement	62520060505	Government of Sudan	625	SLM/A-Minni Minawi	1318	0	0	2006-05-05	2006-05-05	2011-05-05	1	2010-04-15	505	presidential elections: President Bashir wins national presidential elections	-99	May 2010	-99
Sudan	625	4	113	631	631001	Dafur Peace Agreement	62520060505	Government of Sudan	625	SLM/A-Minni Minawi	1318	0	0	2006-05-05	2006-05-05	2011-05-05	1	2010-06-14	100	political power-sharing: Minni Minawi (SLM/A-MM) is not Senior Assistent to President Al-Bashir President anymore (EIU does not report that Minawi is appointed as presidential advisor until the end of the post-conflict period under analysis)	SLM/A-Minni Minawi (1318)	July 2010	-99
Sudan	625	4	113	631	631001	Dafur Peace Agreement	62520060505	Government of Sudan	625	SLM/A-Minni Minawi	1318	0	0	2006-05-05	2006-05-05	2011-05-05	1	2010-06-14	105	political power-sharing: Minni Minawi (SLM/A-MM) is not Senior Assistent to President Al-Bashir President anymore (EIU does not report that Minawi is appointed as presidential advisor until the end of the post-conflict period under analysis)	SLM/A-Minni Minawi (1318)	July 2010	-99
Sudan	625	4	113	631	631001	Dafur Peace Agreement	62520060505	Government of Sudan	625	SLM/A-Minni Minawi	1318	0	0	2006-05-05	2006-05-05	2011-05-05	1	2011-01-15	506	referendum: Southern Sudanese vote in favour secession with some 99%	-99	January 2011 and February 2011	-99
Sudan	625	4	113	631	631001	Dafur Peace Agreement	62520060505	Government of Sudan	625	SLM/A-Minni Minawi	1318	0	0	2006-05-05	2006-05-05	2011-05-05	1	2011-05-05	2	end of 5-year period	-99	-99	UCDP
Afghanistan	700	3	137	412	412001	Islamabad Accord	70019930307	Government of Afghanistan	700	Hizb-i Islami-yi Afghanistan	1141	1	0	1993-03-07	1993-03-07	1993-04-15	1	1993-03-07	1	PA signature	Government of Afghanistan (700), Harakat-i Inqilab-i Islami-yi Afghanistan (1135), Jabha-yi Nijat-i Milli-yi Afghanistan (1137), Mahaz-i Milli-yi Islami-yi Afghanistan (1138), Ittihad-i Islami Bara-yi Azadi-yi Afghanistan (1139), Harakat-i Islami-yi Afghanistan (1140), Hizb-i Islami-yi Afghanistan (1141), Hizb-i Wahdat (1142)	-99	PSED_promises
Afghanistan	700	3	137	412	412001	Islamabad Accord	70019930307	Government of Afghanistan	700	Hizb-i Islami-yi Afghanistan	1141	1	0	1993-03-07	1993-03-07	1993-04-15	1	1993-03-07	100	change in cabinet, Hizb-i Islami-yi Afghanistan leader Gulbuddin Hekmatyar becomes prime minister under the signed peace agreement	Hizb-i Islami-yi Afghanistan (1141)	1993, 1st quarter	-99
Afghanistan	700	3	137	412	412001	Islamabad Accord	70019930307	Government of Afghanistan	700	Hizb-i Islami-yi Afghanistan	1141	1	0	1993-03-07	1993-03-07	1993-04-15	1	1993-03-07	102	change in cabinet, Hizb-i Islami-yi Afghanistan leader Gulbuddin Hekmatyar becomes prime minister under the signed peace agreement	Hizb-i Islami-yi Afghanistan (1141)	1993, 1st quarter	-99
Afghanistan	700	3	137	412	412001	Islamabad Accord	70019930307	Government of Afghanistan	700	Hizb-i Islami-yi Afghanistan	1141	1	0	1993-03-07	1993-03-07	1993-04-15	1	1993-03-09	508	subsequent peace agreement: power-sharing deal between Rabbani and Hekmatyar	Government of Afghanistan (700), Harakat-i Inqilab-i Islami-yi Afghanistan (1135), Jabha-yi Nijat-i Milli-yi Afghanistan (1137), Mahaz-i Milli-yi Islami-yi Afghanistan (1138), Ittihad-i Islami Bara-yi Azadi-yi Afghanistan (1139), Harakat-i Islami-yi Afghanistan (1140), Hizb-i Islami-yi Afghanistan (1141), Hizb-i Wahdat (1142)	1993, 1st quarter	-99
Afghanistan	700	3	137	412	412001	Islamabad Accord	70019930307	Government of Afghanistan	700	Hizb-i Islami-yi Afghanistan	1141	1	0	1993-03-07	1993-03-07	1993-04-15	3	1993-04-15	3	civil conflict recurrence	Government of Afghanistan (700), Hizb-i Islami-yi Afghanistan (1141)	-99	UCDP Encyclopedia
Afghanistan	700	3	137	413	413001	Islamabad Accord	70019930307	Government of Afghanistan	700	Hizb-i Wahdat	1142	1	0	1993-03-07	1993-03-07	1993-04-15	1	1993-03-07	1	PA signature	Government of Afghanistan (700), Harakat-i Inqilab-i Islami-yi Afghanistan (1135), Jabha-yi Nijat-i Milli-yi Afghanistan (1137), Mahaz-i Milli-yi Islami-yi Afghanistan (1138), Ittihad-i Islami Bara-yi Azadi-yi Afghanistan (1139), Harakat-i Islami-yi Afghanistan (1140), Hizb-i Islami-yi Afghanistan (1141), Hizb-i Wahdat (1142)	-99	PSED_promises
Afghanistan	700	3	137	413	413001	Islamabad Accord	70019930307	Government of Afghanistan	700	Hizb-i Wahdat	1142	1	0	1993-03-07	1993-03-07	1993-04-15	1	1993-03-09	508	subsequent peace agreement: power-sharing deal between Rabbani and Hekmatyar	Government of Afghanistan (700), Harakat-i Inqilab-i Islami-yi Afghanistan (1135), Jabha-yi Nijat-i Milli-yi Afghanistan (1137), Mahaz-i Milli-yi Islami-yi Afghanistan (1138), Ittihad-i Islami Bara-yi Azadi-yi Afghanistan (1139), Harakat-i Islami-yi Afghanistan (1140), Hizb-i Islami-yi Afghanistan (1141), Hizb-i Wahdat (1142)	1993, 1st quarter	-99
Afghanistan	700	3	137	413	413001	Islamabad Accord	70019930307	Government of Afghanistan	700	Hizb-i Wahdat	1142	1	0	1993-03-07	1993-03-07	1993-04-15	3	1993-04-15	3	civil conflict recurrence	Government of Afghanistan (700), Hizb-i Wahdat (1142)	-99	UCDP Encyclopedia
Afghanistan	700	3	137	731	731001	Islamabad Accord	70019930307	Government of Afghanistan	700	Harakat-i Inqilab-i Islami-yi Afghanistan	1135	1	0	1993-03-07	1993-03-07	1993-04-15	1	1993-03-07	1	PA signature	Government of Afghanistan (700), Harakat-i Inqilab-i Islami-yi Afghanistan (1135), Jabha-yi Nijat-i Milli-yi Afghanistan (1137), Mahaz-i Milli-yi Islami-yi Afghanistan (1138), Ittihad-i Islami Bara-yi Azadi-yi Afghanistan (1139), Harakat-i Islami-yi Afghanistan (1140), Hizb-i Islami-yi Afghanistan (1141), Hizb-i Wahdat (1142)	-99	PSED_promises
Afghanistan	700	3	137	731	731001	Islamabad Accord	70019930307	Government of Afghanistan	700	Harakat-i Inqilab-i Islami-yi Afghanistan	1135	1	0	1988-12-31	1993-03-07	1993-04-15	1	1993-03-09	508	subsequent peace agreement: power-sharing deal between Rabbani and Hekmatyar	Government of Afghanistan (700), Harakat-i Inqilab-i Islami-yi Afghanistan (1135), Jabha-yi Nijat-i Milli-yi Afghanistan (1137), Mahaz-i Milli-yi Islami-yi Afghanistan (1138), Ittihad-i Islami Bara-yi Azadi-yi Afghanistan (1139), Harakat-i Islami-yi Afghanistan (1140), Hizb-i Islami-yi Afghanistan (1141), Hizb-i Wahdat (1142)	1993, 1st quarter	-99
Afghanistan	700	3	137	731	731001	Islamabad Accord	70019930307	Government of Afghanistan	700	Harakat-i Inqilab-i Islami-yi Afghanistan	1135	1	0	1988-12-31	1993-03-07	1993-04-15	3	1993-04-15	3	civil conflict recurrence	Government of Afghanistan (700), Harakat-i Inqilab-i Islami-yi Afghanistan (1135)	-99	UCDP Encyclopedia
Afghanistan	700	3	137	732	732001	Islamabad Accord	70019930307	Government of Afghanistan	700	Mahaz-i Milli-yi Islami-yi Afghanistan	1138	1	0	1993-03-07	1993-03-07	1993-04-15	1	1993-03-07	1	PA signature	Government of Afghanistan (700), Harakat-i Inqilab-i Islami-yi Afghanistan (1135), Jabha-yi Nijat-i Milli-yi Afghanistan (1137), Mahaz-i Milli-yi Islami-yi Afghanistan (1138), Ittihad-i Islami Bara-yi Azadi-yi Afghanistan (1139), Harakat-i Islami-yi Afghanistan (1140), Hizb-i Islami-yi Afghanistan (1141), Hizb-i Wahdat (1142)	-99	PSED_promises
Afghanistan	700	3	137	732	732001	Islamabad Accord	70019930307	Government of Afghanistan	700	Mahaz-i Milli-yi Islami-yi Afghanistan	1138	1	0	1989-03-05	1993-03-07	1993-04-15	1	1993-03-09	508	subsequent peace agreement: power-sharing deal between Rabbani and Hekmatyar	Government of Afghanistan (700), Harakat-i Inqilab-i Islami-yi Afghanistan (1135), Jabha-yi Nijat-i Milli-yi Afghanistan (1137), Mahaz-i Milli-yi Islami-yi Afghanistan (1138), Ittihad-i Islami Bara-yi Azadi-yi Afghanistan (1139), Harakat-i Islami-yi Afghanistan (1140), Hizb-i Islami-yi Afghanistan (1141), Hizb-i Wahdat (1142)	1993, 1st quarter	-99
Afghanistan	700	3	137	732	732001	Islamabad Accord	70019930307	Government of Afghanistan	700	Mahaz-i Milli-yi Islami-yi Afghanistan	1138	1	0	1989-03-05	1993-03-07	1993-04-15	3	1993-04-15	3	civil conflict recurrence	Government of Afghanistan (700), Mahaz-i Milli-yi Islami-yi Afghanistan (1138)	-99	UCDP Encyclopedia
Afghanistan	700	3	137	733	733001	Islamabad Accord	70019930307	Government of Afghanistan	700	Jabha-yi Nijat-i Milli-yi Afghanistan	1137	1	0	1993-03-07	1993-03-07	1993-04-15	1	1993-03-07	1	PA signature	Government of Afghanistan (700), Harakat-i Inqilab-i Islami-yi Afghanistan (1135), Jabha-yi Nijat-i Milli-yi Afghanistan (1137), Mahaz-i Milli-yi Islami-yi Afghanistan (1138), Ittihad-i Islami Bara-yi Azadi-yi Afghanistan (1139), Harakat-i Islami-yi Afghanistan (1140), Hizb-i Islami-yi Afghanistan (1141), Hizb-i Wahdat (1142)	-99	PSED_promises
Afghanistan	700	3	137	733	733001	Islamabad Accord	70019930307	Government of Afghanistan	700	Jabha-yi Nijat-i Milli-yi Afghanistan	1137	1	0	1988-12-31	1993-03-07	1993-04-15	1	1993-03-09	508	subsequent peace agreement: power-sharing deal between Rabbani and Hekmatyar	Government of Afghanistan (700), Harakat-i Inqilab-i Islami-yi Afghanistan (1135), Jabha-yi Nijat-i Milli-yi Afghanistan (1137), Mahaz-i Milli-yi Islami-yi Afghanistan (1138), Ittihad-i Islami Bara-yi Azadi-yi Afghanistan (1139), Harakat-i Islami-yi Afghanistan (1140), Hizb-i Islami-yi Afghanistan (1141), Hizb-i Wahdat (1142)	1993, 1st quarter	-99
Afghanistan	700	3	137	733	733001	Islamabad Accord	70019930307	Government of Afghanistan	700	Jabha-yi Nijat-i Milli-yi Afghanistan	1137	1	0	1988-12-31	1993-03-07	1993-04-15	3	1993-04-15	3	civil conflict recurrence	Government of Afghanistan (700), Jabha-yi Nijat-i Milli-yi Afghanistan (1137)	-99	UCDP Encyclopedia
Afghanistan	700	3	137	735	735001	Islamabad Accord	70019930307	Government of Afghanistan	700	Ittihad-i Islami Bara-yi Azadi-yi Afghanistan	1139	1	0	1993-03-07	1993-03-07	1993-04-15	1	1993-03-07	1	PA signature	Government of Afghanistan (700), Harakat-i Inqilab-i Islami-yi Afghanistan (1135), Jabha-yi Nijat-i Milli-yi Afghanistan (1137), Mahaz-i Milli-yi Islami-yi Afghanistan (1138), Ittihad-i Islami Bara-yi Azadi-yi Afghanistan (1139), Harakat-i Islami-yi Afghanistan (1140), Hizb-i Islami-yi Afghanistan (1141), Hizb-i Wahdat (1142)	-99	PSED_promises
Afghanistan	700	3	137	735	735001	Islamabad Accord	70019930307	Government of Afghanistan	700	Ittihad-i Islami Bara-yi Azadi-yi Afghanistan	1139	1	0	1988-12-31	1993-03-07	1993-04-15	1	1993-03-09	508	subsequent peace agreement: power-sharing deal between Rabbani and Hekmatyar	Government of Afghanistan (700), Harakat-i Inqilab-i Islami-yi Afghanistan (1135), Jabha-yi Nijat-i Milli-yi Afghanistan (1137), Mahaz-i Milli-yi Islami-yi Afghanistan (1138), Ittihad-i Islami Bara-yi Azadi-yi Afghanistan (1139), Harakat-i Islami-yi Afghanistan (1140), Hizb-i Islami-yi Afghanistan (1141), Hizb-i Wahdat (1142)	1993, 1st quarter	-99
Afghanistan	700	3	137	735	735001	Islamabad Accord	70019930307	Government of Afghanistan	700	Ittihad-i Islami Bara-yi Azadi-yi Afghanistan	1139	1	0	1988-12-31	1993-03-07	1993-04-15	3	1993-04-15	3	civil conflict recurrence	Government of Afghanistan (700), Ittihad-i Islami Bara-yi Azadi-yi Afghanistan (1139)	-99	UCDP Encyclopedia
Afghanistan	700	3	137	737	737001	Islamabad Accord	70019930307	Government of Afghanistan	700	Harakat-i Islami-yi Afghanistan	1140	1	0	1984-12-31	1993-03-07	1993-04-15	1	1993-03-07	1	PA signature	Government of Afghanistan (700), Harakat-i Inqilab-i Islami-yi Afghanistan (1135), Jabha-yi Nijat-i Milli-yi Afghanistan (1137), Mahaz-i Milli-yi Islami-yi Afghanistan (1138), Ittihad-i Islami Bara-yi Azadi-yi Afghanistan (1139), Harakat-i Islami-yi Afghanistan (1140), Hizb-i Islami-yi Afghanistan (1141), Hizb-i Wahdat (1142)	-99	PSED_promises
Afghanistan	700	3	137	737	737001	Islamabad Accord	70019930307	Government of Afghanistan	700	Harakat-i Islami-yi Afghanistan	1140	1	0	1984-12-31	1993-03-07	1993-04-15	1	1993-03-09	508	subsequent peace agreement: power-sharing deal between Rabbani and Hekmatyar	Government of Afghanistan (700), Harakat-i Inqilab-i Islami-yi Afghanistan (1135), Jabha-yi Nijat-i Milli-yi Afghanistan (1137), Mahaz-i Milli-yi Islami-yi Afghanistan (1138), Ittihad-i Islami Bara-yi Azadi-yi Afghanistan (1139), Harakat-i Islami-yi Afghanistan (1140), Hizb-i Islami-yi Afghanistan (1141), Hizb-i Wahdat (1142)	1993, 1st quarter	-99
Afghanistan	700	3	137	737	737001	Islamabad Accord	70019930307	Government of Afghanistan	700	Harakat-i Islami-yi Afghanistan	1140	1	0	1984-12-31	1993-03-07	1993-04-15	3	1993-04-15	3	civil conflict recurrence	Government of Afghanistan (700), Harakat-i Islami-yi Afghanistan (1140)	-99	UCDP Encyclopedia
Afghanistan	700	3	137	412	412002	Jalalabad Agreement	70019930520	Government of Afghanistan	700	Hizb-i Islami-yi Afghanistan	1141	1	1	1993-05-20	1993-05-20	1993-12-31	1	1993-05-20	1	PA signature	Government of Afghanistan (700), Harakat-i Inqilab-i Islami-yi Afghanistan (1135), Jabha-yi Nijat-i Milli-yi Afghanistan (1137), Mahaz-i Milli-yi Islami-yi Afghanistan (1138), Ittihad-i Islami Bara-yi Azadi-yi Afghanistan (1139), Harakat-i Islami-yi Afghanistan (1140), Hizb-i Islami-yi Afghanistan (1141), Hizb-i Wahdat (1142)	-99	PSED_promises
Afghanistan	700	3	137	412	412002	Jalalabad Agreement	70019930520	Government of Afghanistan	700	Hizb-i Islami-yi Afghanistan	1141	1	1	1993-05-20	1993-05-20	1993-12-31	1	1993-05-20	100	political power-sharing: the nine main mujahideen groups name a multy-party cabinet as part of the Jalalabad peace agreement, ministries of agriculture, city planning, civil aviation, commerce, defence/nine-party commission led by, education, finance, foreign affairs, frontiers, health, higher education, information & culture, interior/nine-party commission led by, justice, national communication…	Hizb-i Islami-yi Afghanistan (1141)	1993, 2nd quarter	-99
Afghanistan	700	3	137	412	412002	Jalalabad Agreement	70019930520	Government of Afghanistan	700	Hizb-i Islami-yi Afghanistan	1141	1	1	1993-05-20	1993-05-20	1993-12-31	1	1993-05-20	102	interior/nine-party commission led by - Golboddin Hekmatyar ( Hizb-i Islami-yi Afghanistan)	Hizb-i Islami-yi Afghanistan (1141)	1993, 2nd quarter	-99
Afghanistan	700	3	137	412	412002	Jalalabad Agreement	70019930520	Government of Afghanistan	700	Hizb-i Islami-yi Afghanistan	1141	1	1	1993-05-20	1993-05-20	1993-12-31	1	1993-05-20	102	justice - Jalaluddin Haqqani (Hezb-i Islami)	Hizb-i Islami-yi Afghanistan (1141)	1993, 2nd quarter	-99
Afghanistan	700	3	137	412	412002	Jalalabad Agreement	70019930520	Government of Afghanistan	700	Hizb-i Islami-yi Afghanistan	1141	1	1	1993-05-20	1993-05-20	1993-12-31	1	1993-05-20	104	national communications - Qazi Amin Waqad (Hizb-I Islami Afghanistan)	Hizb-i Islami-yi Afghanistan (1141)	1993, 2nd quarter	-99
Afghanistan	700	3	137	412	412002	Jalalabad Agreement	70019930520	Government of Afghanistan	700	Hizb-i Islami-yi Afghanistan	1141	1	1	1993-05-20	1993-05-20	1993-12-31	4	1993-12-31	3	civil conflict recurrence	Government of Afghanistan (700), Hizb-i Islami-yi Afghanistan (1141)	-99	UCDP Encyclopedia
Afghanistan	700	3	137	413	413002	Jalalabad Agreement	70019930520	Government of Afghanistan	700	Hizb-i Wahdat	1142	1	1	1993-05-20	1993-05-20	1993-12-31	1	1993-05-20	1	PA signature	Government of Afghanistan (700), Harakat-i Inqilab-i Islami-yi Afghanistan (1135), Jabha-yi Nijat-i Milli-yi Afghanistan (1137), Mahaz-i Milli-yi Islami-yi Afghanistan (1138), Ittihad-i Islami Bara-yi Azadi-yi Afghanistan (1139), Harakat-i Islami-yi Afghanistan (1140), Hizb-i Islami-yi Afghanistan (1141), Hizb-i Wahdat (1142)	-99	PSED_promises
Afghanistan	700	3	137	413	413002	Jalalabad Agreement	70019930520	Government of Afghanistan	700	Hizb-i Wahdat	1142	1	1	1993-05-20	1993-05-20	1993-12-31	1	1993-05-20	100	political power-sharing: the nine main mujahideen groups name a multy-party cabinet as part of the Jalalabad peace agreement, ministries of agriculture, city planning, civil aviation, commerce, defence/nine-party commission led by, education, finance, foreign affairs, frontiers, health, higher education, information & culture, interior/nine-party commission led by, justice, national communication…	Hizb-i Wahdat (1142)	1993, 2nd quarter	-99
Afghanistan	700	3	137	413	413002	Jalalabad Agreement	70019930520	Government of Afghanistan	700	Hizb-i Wahdat	1142	1	1	1993-05-20	1993-05-20	1993-12-31	1	1993-05-20	102	Minister of finance - Abdul Karim Khalili	Hizb-i Wahdat (1142)	1993, 2nd quarter	-99
Afghanistan	700	3	137	413	413002	Jalalabad Agreement	70019930520	Government of Afghanistan	700	Hizb-i Wahdat	1142	1	1	1993-05-20	1993-05-20	1993-12-31	4	1993-12-31	3	civil conflict recurrence	Government of Afghanistan (700), Hizb-i Wahdat (1142)	-99	UCDP Encyclopedia
Afghanistan	700	3	137	731	731002	Jalalabad Agreement	70019930520	Government of Afghanistan	700	Harakat-i Inqilab-i Islami-yi Afghanistan	1135	1	1	1993-05-20	1993-05-20	1993-12-31	1	1993-05-20	1	PA signature	Government of Afghanistan (700), Harakat-i Inqilab-i Islami-yi Afghanistan (1135), Jabha-yi Nijat-i Milli-yi Afghanistan (1137), Mahaz-i Milli-yi Islami-yi Afghanistan (1138), Ittihad-i Islami Bara-yi Azadi-yi Afghanistan (1139), Harakat-i Islami-yi Afghanistan (1140), Hizb-i Islami-yi Afghanistan (1141), Hizb-i Wahdat (1142)	-99	PSED_promises
Afghanistan	700	3	137	731	731002	Jalalabad Agreement	70019930520	Government of Afghanistan	700	Harakat-i Inqilab-i Islami-yi Afghanistan	1135	1	1	1993-05-20	1993-05-20	1993-12-31	4	1993-12-31	3	civil conflict recurrence	Government of Afghanistan (700), Harakat-i Inqilab-i Islami-yi Afghanistan (1135)	-99	UCDP Encyclopedia
Afghanistan	700	3	137	732	732002	Jalalabad Agreement	70019930520	Government of Afghanistan	700	Mahaz-i Milli-yi Islami-yi Afghanistan	1138	1	1	1993-05-20	1993-05-20	1993-12-31	1	1993-05-20	1	PA signature	Government of Afghanistan (700), Harakat-i Inqilab-i Islami-yi Afghanistan (1135), Jabha-yi Nijat-i Milli-yi Afghanistan (1137), Mahaz-i Milli-yi Islami-yi Afghanistan (1138), Ittihad-i Islami Bara-yi Azadi-yi Afghanistan (1139), Harakat-i Islami-yi Afghanistan (1140), Hizb-i Islami-yi Afghanistan (1141), Hizb-i Wahdat (1142)	-99	PSED_promises
Afghanistan	700	3	137	732	732002	Jalalabad Agreement	70019930520	Government of Afghanistan	700	Mahaz-i Milli-yi Islami-yi Afghanistan	1138	1	1	1993-05-20	1993-05-20	1993-12-31	1	1993-05-20	100	political power-sharing: the nine main mujahideen groups name a multy-party cabinet as part of the Jalalabad peace agreement, ministries of agriculture, city planning, civil aviation, commerce, defence/nine-party commission led by, education, finance, foreign affairs, frontiers, health, higher education, information & culture, interior/nine-party commission led by, justice, national communication…	Mahaz-i Milli-yi Islami-yi Afghanistan (1138)	1993, 2nd quarter	-99
Afghanistan	700	3	137	732	732002	Jalalabad Agreement	70019930520	Government of Afghanistan	700	Mahaz-i Milli-yi Islami-yi Afghanistan	1138	1	1	1993-05-20	1993-05-20	1993-12-31	1	1993-05-20	102	Minister of foreign affairs - Hidayat Amin Arsalla	Mahaz-i Milli-yi Islami-yi Afghanistan (1138)	1993, 2nd quarter	-99
Afghanistan	700	3	137	732	732002	Jalalabad Agreement	70019930520	Government of Afghanistan	700	Mahaz-i Milli-yi Islami-yi Afghanistan	1138	1	1	1993-05-20	1993-05-20	1993-12-31	1	1993-05-20	104	Frontiers - Sulaiman Gailani (mahaz-i melli-ye islami-ye Afghanistan)	Mahaz-i Milli-yi Islami-yi Afghanistan (1138)	1993, 2nd quarter	-99
Afghanistan	700	3	137	732	732002	Jalalabad Agreement	70019930520	Government of Afghanistan	700	Mahaz-i Milli-yi Islami-yi Afghanistan	1138	1	1	1993-05-20	1993-05-20	1993-12-31	4	1993-12-31	3	civil conflict recurrence	Government of Afghanistan (700), Mahaz-i Milli-yi Islami-yi Afghanistan (1138)	-99	UCDP Encyclopedia
Afghanistan	700	3	137	733	733002	Jalalabad Agreement	70019930520	Government of Afghanistan	700	Jabha-yi Nijat-i Milli-yi Afghanistan	1137	1	1	1993-05-20	1993-05-20	1993-12-31	1	1993-05-20	1	PA signature	Government of Afghanistan (700), Harakat-i Inqilab-i Islami-yi Afghanistan (1135), Jabha-yi Nijat-i Milli-yi Afghanistan (1137), Mahaz-i Milli-yi Islami-yi Afghanistan (1138), Ittihad-i Islami Bara-yi Azadi-yi Afghanistan (1139), Harakat-i Islami-yi Afghanistan (1140), Hizb-i Islami-yi Afghanistan (1141), Hizb-i Wahdat (1142)	-99	PSED_promises
Afghanistan	700	3	137	733	733002	Jalalabad Agreement	70019930520	Government of Afghanistan	700	Jabha-yi Nijat-i Milli-yi Afghanistan	1137	1	1	1993-05-20	1993-05-20	1993-12-31	1	1993-05-20	100	political power-sharing: the nine main mujahideen groups name a multy-party cabinet as part of the Jalalabad peace agreement, ministries of agriculture, city planning, civil aviation, commerce, defence/nine-party commission led by, education, finance, foreign affairs, frontiers, health, higher education, information & culture, interior/nine-party commission led by, justice, national communication…	Jabha-yi Nijat-i Milli-yi Afghanistan (1137)	1993, 2nd quarter	-99
Afghanistan	700	3	137	733	733002	Jalalabad Agreement	70019930520	Government of Afghanistan	700	Jabha-yi Nijat-i Milli-yi Afghanistan	1137	1	1	1993-05-20	1993-05-20	1993-12-31	1	1993-05-20	104	Minister Civil Aviation - Hashmatullah Mojadedi (Jehh-e Najat-i Milli)	Jabha-yi Nijat-i Milli-yi Afghanistan (1137)	1993, 2nd quarter	-99
Afghanistan	700	3	137	733	733002	Jalalabad Agreement	70019930520	Government of Afghanistan	700	Jabha-yi Nijat-i Milli-yi Afghanistan	1137	1	1	1993-05-20	1993-05-20	1993-12-31	4	1993-12-31	3	civil conflict recurrence	Government of Afghanistan (700), Jabha-yi Nijat-i Milli-yi Afghanistan (1137)	-99	UCDP Encyclopedia
Afghanistan	700	3	137	735	735002	Jalalabad Agreement	70019930520	Government of Afghanistan	700	Ittihad-i Islami Bara-yi Azadi-yi Afghanistan	1139	1	1	1993-05-20	1993-05-20	1993-12-31	1	1993-05-20	1	PA signature	Government of Afghanistan (700), Harakat-i Inqilab-i Islami-yi Afghanistan (1135), Jabha-yi Nijat-i Milli-yi Afghanistan (1137), Mahaz-i Milli-yi Islami-yi Afghanistan (1138), Ittihad-i Islami Bara-yi Azadi-yi Afghanistan (1139), Harakat-i Islami-yi Afghanistan (1140), Hizb-i Islami-yi Afghanistan (1141), Hizb-i Wahdat (1142)	-99	PSED_promises
Afghanistan	700	3	137	735	735002	Jalalabad Agreement	70019930520	Government of Afghanistan	700	Ittihad-i Islami Bara-yi Azadi-yi Afghanistan	1139	1	1	1993-05-20	1993-05-20	1993-12-31	1	1993-05-20	100	political power-sharing: the nine main mujahideen groups name a multy-party cabinet as part of the Jalalabad peace agreement, ministries of agriculture, city planning, civil aviation, commerce, defence/nine-party commission led by, education, finance, foreign affairs, frontiers, health, higher education, information & culture, interior/nine-party commission led by, justice, national communication…	Ittihad-i Islami Bara-yi Azadi-yi Afghanistan (1139)	1993, 2nd quarter	-99
Afghanistan	700	3	137	735	735002	Jalalabad Agreement	70019930520	Government of Afghanistan	700	Ittihad-i Islami Bara-yi Azadi-yi Afghanistan	1139	1	1	1993-05-20	1993-05-20	1993-12-31	1	1993-05-20	104	health - Mohammad Amid Fatimi (Ittihad-e Islami Mujahideen)	Ittihad-i Islami Bara-yi Azadi-yi Afghanistan (1139)	1993, 2nd quarter	-99
Afghanistan	700	3	137	735	735002	Jalalabad Agreement	70019930520	Government of Afghanistan	700	Ittihad-i Islami Bara-yi Azadi-yi Afghanistan	1139	1	1	1993-05-20	1993-05-20	1993-12-31	4	1993-12-31	3	civil conflict recurrence	Government of Afghanistan (700), Ittihad-i Islami Bara-yi Azadi-yi Afghanistan (1139)	-99	UCDP Encyclopedia
Afghanistan	700	3	137	737	737002	Jalalabad Agreement	70019930520	Government of Afghanistan	700	Harakat-i Islami-yi Afghanistan	1140	1	1	1993-05-20	1993-05-20	1993-12-31	1	1993-05-20	1	PA signature	Government of Afghanistan (700), Harakat-i Inqilab-i Islami-yi Afghanistan (1135), Jabha-yi Nijat-i Milli-yi Afghanistan (1137), Mahaz-i Milli-yi Islami-yi Afghanistan (1138), Ittihad-i Islami Bara-yi Azadi-yi Afghanistan (1139), Harakat-i Islami-yi Afghanistan (1140), Hizb-i Islami-yi Afghanistan (1141), Hizb-i Wahdat (1142)	-99	PSED_promises
Afghanistan	700	3	137	737	737002	Jalalabad Agreement	70019930520	Government of Afghanistan	700	Harakat-i Islami-yi Afghanistan	1140	1	1	1993-05-20	1993-05-20	1993-12-31	1	1993-05-20	100	political power-sharing: the nine main mujahideen groups name a multy-party cabinet as part of the Jalalabad peace agreement, ministries of agriculture, city planning, civil aviation, commerce, defence/nine-party commission led by, education, finance, foreign affairs, frontiers, health, higher education, information & culture, interior/nine-party commission led by, justice, national communication…	Harakat-i Islami-yi Afghanistan (1140)	1993, 2nd quarter	-99
Afghanistan	700	3	137	737	737002	Jalalabad Agreement	70019930520	Government of Afghanistan	700	Harakat-i Islami-yi Afghanistan	1140	1	1	1993-05-20	1993-05-20	1993-12-31	1	1993-05-20	104	planning - Mohammad Ali Javed (Harakat-e Islami-ye Afghanistan)	Harakat-i Islami-yi Afghanistan (1140)	1993, 2nd quarter	-99
Afghanistan	700	3	137	737	737002	Jalalabad Agreement	70019930520	Government of Afghanistan	700	Harakat-i Islami-yi Afghanistan	1140	1	1	1993-05-20	1993-05-20	1993-12-31	1	1993-05-20	104	transport - Syed Anwari (Harakt-e Islami)	Harakat-i Islami-yi Afghanistan (1140)	1993, 2nd quarter	-99
Afghanistan	700	3	137	737	737002	Jalalabad Agreement	70019930520	Government of Afghanistan	700	Harakat-i Islami-yi Afghanistan	1140	1	1	1993-05-20	1993-05-20	1993-12-31	4	1993-12-31	3	civil conflict recurrence	Government of Afghanistan (700), Harakat-i Islami-yi Afghanistan (1140)	-99	UCDP Encyclopedia
Afghanistan	700	3	137	412	412003	Mahipar Agreement	70019960524	Government of Afghanistan	700	Hizb-i Islami-yi Afghanistan	1411	0	1	1995-12-31	1996-05-24	1996-09-28	1	1996-05-24	1	PA signature	Government of Afghanistan (700), Hizb-i Islami-yi Afghanistan (1141)	-99	PSED_promises
Afghanistan	700	3	137	412	412003	Mahipar Agreement	70019960524	Government of Afghanistan	700	Hizb-i Islami-yi Afghanistan	1411	0	1	1995-12-31	1996-05-24	1996-09-28	1	1996-07-04	102	Defence Minster: Washidullah Sabaoon (Hezb-i-Islami's intelligence chief)	Hizb-i Islami-yi Afghanistan (1141)	1996, 3rd quarter	-99
Afghanistan	700	3	137	412	412003	Mahipar Agreement	70019960524	Government of Afghanistan	700	Hizb-i Islami-yi Afghanistan	1411	0	1	1995-12-31	1996-05-24	1996-09-28	1	1996-07-04	102	Minister of Finance: Abdul Hadi Arghandiwal	Hizb-i Islami-yi Afghanistan (1141)	1996, 3rd quarter	-99
Afghanistan	700	3	137	412	412003	Mahipar Agreement	70019960524	Government of Afghanistan	700	Hizb-i Islami-yi Afghanistan	1411	0	1	1995-12-31	1996-05-24	1996-09-28	3	1996-09-28	3	civil conflict recurrence	Government of Afghanistan (700), Hizb-i Islami-yi Afghanistan (1141)	-99	UCDP Encyclopedia
Tajikistan	702	3	200	353	353001	Moscow Declaration	70219970627	Government of Tajikistan	702	UTO	1188	0	0	1996-12-23	1997-06-27	1998-03-31	1	1997-06-27	1	PA signature	Government of Tajikistan (702), UTO (1188)	-99	PSED_promises
Tajikistan	702	3	200	353	353001	Moscow Declaration	70219970627	Government of Tajikistan	702	UTO	1188	0	0	1996-12-23	1997-06-27	1998-03-31	3	1998-03-31	3	civil conflict recurrence	Government of Tajikistan (702), UTO (1188)	-99	UCDP Encyclopedia
India	750	3	227	309	309001	Bodoland Autonomous Council Act	75019930220	Government of India	750	ABSU	1205	0	0	1990-12-31	1993-02-20	1998-02-20	1	1993-02-20	1	PA signature	Government of India (750), ABSU (1205)	-99	PSED_promises
India	750	3	227	309	309001	Bodoland Autonomous Council Act	75019930220	Government of India	750	ABSU	1205	0	0	1990-12-31	1993-02-20	1998-02-20	1	1996-05-07	504	parliamentary elections: Congress party led by former PM Rao biggest loser, parliamentary representation falls from 259 to 136 out of 543 seats, 30%, BJP increases representation from 117 to 161 and its allies win another 34 seats (including the ideologically close, Marathi nationalist, Shiv Sena party in Maharashtra, the socialist Samata party), regional and caste-based parties the winners: "thi…	-99	1996, 2nd quarter, 1996, 3rd quarter	-99
India	750	3	227	309	309001	Bodoland Autonomous Council Act	75019930220	Government of India	750	ABSU	1205	0	0	1990-12-31	1993-02-20	1998-02-20	1	1998-02-20	2	end of 5-year period	-99	-99	UCDP
India	750	3	139	262	262001	Memorandum of Settlement	75019930823	Government of India	750	ATTF	1149	0	0	1993-08-23	1993-08-23	1997-01-01	1	1993-08-23	1	PA signature	Government of India (750), ATTF (1149)	-99	PSED_promises
India	750	3	139	262	262001	Memorandum of Settlement	75019930823	Government of India	750	ATTF	1149	0	0	1993-08-23	1993-08-23	1997-01-01	1	1996-05-07	504	parliamentary elections: Congress party led by former PM Rao biggest loser, parliamentary representation falls from 259 to 136 out of 543 seats, 30%, BJP increases representation from 117 to 161 and its allies win another 34 seats (including the ideologically close, Marathi nationalist, Shiv Sena party in Maharashtra, the socialist Samata party), regional and caste-based parties the winners: "thi…	-99	1996, 2nd quarter, 1996, 3rd quarter	-99
India	750	3	139	262	262001	Memorandum of Settlement	75019930823	Government of India	750	ATTF	1149	0	0	1993-08-23	1993-08-23	1997-01-01	1	1997-01-01	3	civil conflict recurrence	Government of India (750), ATTF (1149)	-99	UCDP Termination
Bangladesh	771	3	126	223	223001	Chittagong Hill Tracts Peace Accord	77119971202	Government of Bangladesh	771	JSS/SB	1127	0	0	1992-11-05	1997-12-02	2002-12-02	1	1997-12-02	1	PA signature	Government of Bangladesh (771), JSS/SB (1127)	-99	PSED_promises
Bangladesh	771	3	126	223	223001	Chittagong Hill Tracts Peace Accord	77119971202	Government of Bangladesh	771	JSS/SB	1127	0	0	1992-11-05	1997-12-02	2002-12-02	1	1997-12-31	100	CHT tribal representative becomes part of national cabinet; no portfolio assigned yet	JSS/SB (1127)	1st quarter 1998, p14	-99
Bangladesh	771	3	126	223	223001	Chittagong Hill Tracts Peace Accord	77119971202	Government of Bangladesh	771	JSS/SB	1127	0	0	1992-11-05	1997-12-02	2002-12-02	1	1997-12-31	104	CHT tribal representative becomes part of national cabinet; no portfolio assigned yet /// Minister without portfolio: Kalpa Ranjan Chakma (CHT)	JSS/SB (1127)	1st quarter 1998, p14	-99
Bangladesh	771	3	126	223	223001	Chittagong Hill Tracts Peace Accord	77119971202	Government of Bangladesh	771	JSS/SB	1127	0	0	1992-11-05	1997-12-02	2002-12-02	1	1998-05-09	400	territorial power-sharing: regulations from the CHT peace accord are passed as laws		2nd quarter 1998, p10+12	-99
Bangladesh	771	3	126	223	223001	Chittagong Hill Tracts Peace Accord	77119971202	Government of Bangladesh	771	JSS/SB	1127	0	0	1992-11-05	1997-12-02	2002-12-02	4	1998-06-12	267	military integration: 700 former guerrillas being absorbed in the police	JSS/SB (1127)	-99	The Straits Times (Singapore), 12 June 1998
Bangladesh	771	3	126	223	223001	Chittagong Hill Tracts Peace Accord	77119971202	Government of Bangladesh	771	JSS/SB	1127	0	0	1992-11-05	1997-12-02	2002-12-02	1	1998-07-21	100	CHT ministry established	JSS/SB (1127)	3rd quarter 1998, p12	-99
Bangladesh	771	3	126	223	223001	Chittagong Hill Tracts Peace Accord	77119971202	Government of Bangladesh	771	JSS/SB	1127	0	0	1992-11-05	1997-12-02	2002-12-02	1	1998-07-21	104	New Minister for CHT affairs: Kalpan Ranjan Chakma (CHT)	JSS/SB (1127)	3rd quarter 1998, p12	-99
Bangladesh	771	3	126	223	223001	Chittagong Hill Tracts Peace Accord	77119971202	Government of Bangladesh	771	JSS/SB	1127	0	0	1992-11-05	1997-12-02	2002-12-02	1	1998-07-21	105	Old Minister without portfolio: Kalpa Ranjan Chakma (CHT)	JSS/SB (1127)	3rd quarter 1998, p12	-99
Bangladesh	771	3	126	223	223001	Chittagong Hill Tracts Peace Accord	77119971202	Government of Bangladesh	771	JSS/SB	1127	0	0	1992-11-05	1997-12-02	2002-12-02	1	2001-07-15	100	caretaker government takes over ahead of national elections	JSS/SB (1127)	July 2001, p13	-99
Bangladesh	771	3	126	223	223001	Chittagong Hill Tracts Peace Accord	77119971202	Government of Bangladesh	771	JSS/SB	1127	0	0	1992-11-05	1997-12-02	2002-12-02	1	2001-07-15	105	Old Minister for CHT affairs: Kalpan Ranjan Chakma (CHT)	JSS/SB (1127)	July 2001, p13	-99
Bangladesh	771	3	126	223	223001	Chittagong Hill Tracts Peace Accord	77119971202	Government of Bangladesh	771	JSS/SB	1127	0	0	1992-11-05	1997-12-02	2002-12-02	1	2001-10-01	504	parliamentary elections: BNP-led alliance captured a two-thirds majority—214 seats out of the 298 seats, BNP (191 seats ), Jamaat-e-Islami ( 17 seats), The Awami League (AL) (63 seats compared with 146 seats in the previous election in June 1996. An alliance built around the faction of the Jatiya Party (JP) won 14 seats. The remainder went to small parties and independent candidates.	-99	October 2001, p13/14	-99
Bangladesh	771	3	126	223	223001	Chittagong Hill Tracts Peace Accord	77119971202	Government of Bangladesh	771	JSS/SB	1127	0	0	1992-11-05	1997-12-02	2002-12-02	1	2002-12-02	2	end of 5-year period	-99	-99	UCDP
Nepal	790	3	72	349	349001	Comprehensive Peace Agreement (Nepal)	79020061121	Government of Nepal	790	CPN-M	1100	0	0	2006-11-21	2006-11-21	2011-11-21	1	2006-11-21	1	PA signature	Government of Nepal (790), CPN-M (1100)	-99	PSED_promises
Nepal	790	3	72	349	349001	Comprehensive Peace Agreement (Nepal)	79020061121	Government of Nepal	790	CPN-M	1100	0	0	2006-11-21	2006-11-21	2011-11-21	1	2006-11-28	508	subsequent peace agreement: agreement on arms management and decommissioning /// government, Communist Party of Nepal (Maoist), UN	Government of Nepal (790), CPN-M (1100)	1st Quarter 2007	-99
Nepal	790	3	72	349	349001	Comprehensive Peace Agreement (Nepal)	79020061121	Government of Nepal	790	CPN-M	1100	0	0	2006-11-21	2006-11-21	2011-11-21	1	2007-01-15	121	political power-sharing (rebel group quota in parliament): quotas in the national parliament introduced; The Nepali Congress has 85 MPs in the interim parliament, while the CPN (UML) and the CPN (M) have 83 each. The Nepali Congress (Democratic) has 48 MPs and the Rashtriya Prajatantra Party (RPP) nine. The remaining parties in parliament are the Nepal Sadbhavana Party (Anandi Devi) or NSP (A), w…	CPN-M (1100)	1st Quarter 2007	-99
Nepal	790	3	72	349	349001	Comprehensive Peace Agreement (Nepal)	79020061121	Government of Nepal	790	CPN-M	1100	0	0	2006-11-21	2006-11-21	2011-11-21	1	2007-01-15	507	constitution: new interim constitution (including interim parliament) promulgated	-99	1st Quarter 2007	-99
Nepal	790	3	72	349	349001	Comprehensive Peace Agreement (Nepal)	79020061121	Government of Nepal	790	CPN-M	1100	0	0	2006-11-21	2006-11-21	2011-11-21	1	2007-04-01	100	change in cabinet, Communist Party of Nepal (Maoist), or CPN (M), amongst others they head the ministry of Information & communications which is crucial for the elections; ministry of Agriculture and co-operatives, ministry of Culture, tourism & civil aviation, ministry of Education & sports, ministry of Environment, science & technology, ministry of Foreign affairs, ministry of Health & populati…	CPN-M (1100)	2nd Quarter 2007	-99
Nepal	790	3	72	349	349001	Comprehensive Peace Agreement (Nepal)	79020061121	Government of Nepal	790	CPN-M	1100	0	0	2006-11-21	2006-11-21	2011-11-21	1	2007-04-01	104	Minister of Agriculture and Co-Operatives: Chhabi Lal Bishwokarma (CPN-M)	CPN-M (1100)	2nd Quarter 2007	-99
Nepal	790	3	72	349	349001	Comprehensive Peace Agreement (Nepal)	79020061121	Government of Nepal	790	CPN-M	1100	0	0	2006-11-21	2006-11-21	2011-11-21	1	2007-04-01	104	Minister of Information & Communications: Krishna Bahadur Mahara (CPN)	CPN-M (1100)	2nd Quarter 2007	-99
Nepal	790	3	72	349	349001	Comprehensive Peace Agreement (Nepal)	79020061121	Government of Nepal	790	CPN-M	1100	0	0	2006-11-21	2006-11-21	2011-11-21	1	2007-04-01	104	Minister of Local Development: Dev Prasad Gurung (CPN-M)	CPN-M (1100)	2nd Quarter 2007	-99
Nepal	790	3	72	349	349001	Comprehensive Peace Agreement (Nepal)	79020061121	Government of Nepal	790	CPN-M	1100	0	0	2006-11-21	2006-11-21	2011-11-21	1	2007-04-01	104	Minister for Physical Planning & Works: Hisila Yami (CPN)	CPN-M (1100)	2nd Quarter 2007	-99
Nepal	790	3	72	349	349001	Comprehensive Peace Agreement (Nepal)	79020061121	Government of Nepal	790	CPN-M	1100	0	0	2006-11-21	2006-11-21	2011-11-21	1	2007-04-01	104	Minister of Children & Social Welfare: Pampha Bhusal (CPN)	CPN-M (1100)	2nd Quarter 2007	-99
Nepal	790	3	72	349	349001	Comprehensive Peace Agreement (Nepal)	79020061121	Government of Nepal	790	CPN-M	1100	0	0	2006-11-21	2006-11-21	2011-11-21	1	2007-06-13	500	proportional representation: introduction of proportional representation; 50% first past the post, 50% on the basis of proportional representation	-99	3rd Quarter 2007	-99
Nepal	790	3	72	349	349001	Comprehensive Peace Agreement (Nepal)	79020061121	Government of Nepal	790	CPN-M	1100	0	0	2006-11-21	2006-11-21	2011-11-21	1	2007-09-18	100	change in cabinet, Communist Party of Nepal (Maoist), or CPN (M) quit government; demand: abolishment of the monarchy, elections entirely based on proportional representation; but motivations multifaceted	CPN-M (1100)	4th Quarter 2007	-99
Nepal	790	3	72	349	349001	Comprehensive Peace Agreement (Nepal)	79020061121	Government of Nepal	790	CPN-M	1100	0	0	2006-11-21	2006-11-21	2011-11-21	1	2007-09-18	105	Old Minister of Agriculture and Co-Operatives: Chhabi Lal Bishwokarma (CPN-M)	CPN-M (1100)	4th Quarter 2007	-99
Nepal	790	3	72	349	349001	Comprehensive Peace Agreement (Nepal)	79020061121	Government of Nepal	790	CPN-M	1100	0	0	2006-11-21	2006-11-21	2011-11-21	1	2007-09-18	105	Old Minister of Information & Communications: Krishna Bahadur Mahara (CPN)	CPN-M (1100)	4th Quarter 2007	-99
Nepal	790	3	72	349	349001	Comprehensive Peace Agreement (Nepal)	79020061121	Government of Nepal	790	CPN-M	1100	0	0	2006-11-21	2006-11-21	2011-11-21	1	2007-09-18	105	Old Minister of Local Development: Dev Prasad Gurung (CPN-M)	CPN-M (1100)	4th Quarter 2007	-99
Nepal	790	3	72	349	349001	Comprehensive Peace Agreement (Nepal)	79020061121	Government of Nepal	790	CPN-M	1100	0	0	2006-11-21	2006-11-21	2011-11-21	1	2007-09-18	105	Old Minister for Physical Planning & Works: Hisila Yami (CPN)	CPN-M (1100)	4th Quarter 2007	-99
Nepal	790	3	72	349	349001	Comprehensive Peace Agreement (Nepal)	79020061121	Government of Nepal	790	CPN-M	1100	0	0	2006-11-21	2006-11-21	2011-11-21	1	2007-09-18	105	Old Minister of Children & Social Welfare: Pampha Bhusal (CPN)	CPN-M (1100)	4th Quarter 2007	-99
Nepal	790	3	72	349	349001	Comprehensive Peace Agreement (Nepal)	79020061121	Government of Nepal	790	CPN-M	1100	0	0	2006-11-21	2006-11-21	2011-11-21	1	2007-12-30	100	change in cabinet, Maoists rejoin government; ministry of Industry, commerce & supplies, ministry of Information & communications, ministry of Local development, ministry of Physical planning & works, ministry of Women, children & social welfare	CPN-M (1100)	1st Quarter 2008	-99
Nepal	790	3	72	349	349001	Comprehensive Peace Agreement (Nepal)	79020061121	Government of Nepal	790	CPN-M	1100	0	0	2006-11-21	2006-11-21	2011-11-21	1	2007-12-30	104	New Minister of Information & Communications: Krishna Bahadur Mahara (CPN-M)	CPN-M (1100)	1st Quarter 2008	-99
Nepal	790	3	72	349	349001	Comprehensive Peace Agreement (Nepal)	79020061121	Government of Nepal	790	CPN-M	1100	0	0	2006-11-21	2006-11-21	2011-11-21	1	2007-12-30	104	New Minister for Local Development: Dev Prasad Guring (CPN-M)	CPN-M (1100)	1st Quarter 2008	-99
Nepal	790	3	72	349	349001	Comprehensive Peace Agreement (Nepal)	79020061121	Government of Nepal	790	CPN-M	1100	0	0	2006-11-21	2006-11-21	2011-11-21	1	2007-12-30	104	New Minister for Physical Planning & Works: Hisila Yami (CPN-M)	CPN-M (1100)	1st Quarter 2008	-99
Nepal	790	3	72	349	349001	Comprehensive Peace Agreement (Nepal)	79020061121	Government of Nepal	790	CPN-M	1100	0	0	2006-11-21	2006-11-21	2011-11-21	1	2007-12-30	104	New Minister for Children & Social Welfare: Pampha Bhusal (CPN-M)	CPN-M (1100)	1st Quarter 2008	-99
Nepal	790	3	72	349	349001	Comprehensive Peace Agreement (Nepal)	79020061121	Government of Nepal	790	CPN-M	1100	0	0	2006-11-21	2006-11-21	2011-11-21	1	2008-04-10	122	political power-sharing (rebel group quota in parliament): quotas in the national parliament abolished	CPN-M (1100)	2nd Quarter 2008	-99
Nepal	790	3	72	349	349001	Comprehensive Peace Agreement (Nepal)	79020061121	Government of Nepal	790	CPN-M	1100	0	0	2006-11-21	2006-11-21	2011-11-21	1	2008-04-10	504	parliamentary elections: total number of elected seats: 575 (601 members), Communist Party of Nepal (Maoist), or CPN (M): 220, Nepali Congress: 110, CPN (UML): 103, Madeshi People's Right Forum: 52, royalist parties: 15	-99	2nd Quarter 2008	-99
Nepal	790	3	72	349	349001	Comprehensive Peace Agreement (Nepal)	79020061121	Government of Nepal	790	CPN-M	1100	0	0	2006-11-21	2006-11-21	2011-11-21	1	2008-08-15	100	change in cabinet, CPN (M) prime minister elected by 464 votes to 113, CPN (M) secured the support in parliament of the CPN (UML) and the MPRF	CPN-M (1100)	3rd Quarter 2008	-99
Nepal	790	3	72	349	349001	Comprehensive Peace Agreement (Nepal)	79020061121	Government of Nepal	790	CPN-M	1100	0	0	2006-11-21	2006-11-21	2011-11-21	1	2008-08-15	102	New Prime Minister: Pushpa Kamal Dahal / Comrade Prachanda: leader of the CPN (M)	CPN-M (1100)	3rd Quarter 2008	-99
Nepal	790	3	72	349	349001	Comprehensive Peace Agreement (Nepal)	79020061121	Government of Nepal	790	CPN-M	1100	0	0	2006-11-21	2006-11-21	2011-11-21	1	2008-08-31	100	change in cabinet, formation of government coalition and 24-member cabinet after constituent assembly election; Communist Party of Nepal (Maoist), or CPN (M), Communist Party of Nepal (Unified Marxist Leninist), or CPN (UML), the Madeshi People's Rights Forum (MPRF), the Nepal Sadbhavana Party, the Communist Party of Nepal (United) and the People's Front Nepal	CPN-M (1100)	4th Quarter 2008	-99
Nepal	790	3	72	349	349001	Comprehensive Peace Agreement (Nepal)	79020061121	Government of Nepal	790	CPN-M	1100	0	0	2006-11-21	2006-11-21	2011-11-21	1	2008-08-31	105	cabinet exit due to new cabinet: Minister of Information & Communications: Krishna Bahadur Mahara (CPN-M)	CPN-M (1100)	4th Quarter 2008	-99
Nepal	790	3	72	349	349001	Comprehensive Peace Agreement (Nepal)	79020061121	Government of Nepal	790	CPN-M	1100	0	0	2006-11-21	2006-11-21	2011-11-21	1	2008-08-31	105	cabinet exit due to new cabinet: Minister for Local Development: Dev Prasad Guring (CPN-M)	CPN-M (1100)	4th Quarter 2008	-99
Nepal	790	3	72	349	349001	Comprehensive Peace Agreement (Nepal)	79020061121	Government of Nepal	790	CPN-M	1100	0	0	2006-11-21	2006-11-21	2011-11-21	1	2008-08-31	105	cabinet exit due to new cabinet: Minister for Physical Planning & Works: Hisila Yami (CPN-M)	CPN-M (1100)	4th Quarter 2008	-99
Nepal	790	3	72	349	349001	Comprehensive Peace Agreement (Nepal)	79020061121	Government of Nepal	790	CPN-M	1100	0	0	2006-11-21	2006-11-21	2011-11-21	1	2008-08-31	105	cabinet exit due to new cabinet: Minister for Children & Social Welfare: Pampha Bhusal (CPN-M)	CPN-M (1100)	4th Quarter 2008	-99
Nepal	790	3	72	349	349001	Comprehensive Peace Agreement (Nepal)	79020061121	Government of Nepal	790	CPN-M	1100	0	0	2006-11-21	2006-11-21	2011-11-21	1	2008-08-31	102	Minister of Defence: Ram Bahadur Thapa (CPN-M)	CPN-M (1100)	4th Quarter 2008	Statesman's Yearbook
Nepal	790	3	72	349	349001	Comprehensive Peace Agreement (Nepal)	79020061121	Government of Nepal	790	CPN-M	1100	0	0	2006-11-21	2006-11-21	2011-11-21	1	2008-08-31	102	Minister of Finance: Dr. Baburam Bhattarai (CNP-M)	CPN-M (1100)	4th Quarter 2008	Statesman's Yearbook
Nepal	790	3	72	349	349001	Comprehensive Peace Agreement (Nepal)	79020061121	Government of Nepal	790	CPN-M	1100	0	0	2006-11-21	2006-11-21	2011-11-21	1	2008-08-31	102	Minister of Law, Justice and Constitutional Affairs: Dev Prasad Grugung (CPN-M)	CPN-M (1100)	4th Quarter 2008	Statesman's Yearbook
Nepal	790	3	72	349	349001	Comprehensive Peace Agreement (Nepal)	79020061121	Government of Nepal	790	CPN-M	1100	0	0	2006-11-21	2006-11-21	2011-11-21	1	2008-08-31	104	Minister for Women, Children and Social Affairs: Pushpa Kamal Dahal / Comrade Prachanda: leader of the CPN (M)	CPN-M (1100)	4th Quarter 2008	Statesman's Yearbook
Nepal	790	3	72	349	349001	Comprehensive Peace Agreement (Nepal)	79020061121	Government of Nepal	790	CPN-M	1100	0	0	2006-11-21	2006-11-21	2011-11-21	1	2008-08-31	104	Minister for Land Reform and Management: Pushpa Kamal Dahal / Comrade Prachanda: leader of the CPN (M)	CPN-M (1100)	4th Quarter 2008	Statesman's Yearbook
Nepal	790	3	72	349	349001	Comprehensive Peace Agreement (Nepal)	79020061121	Government of Nepal	790	CPN-M	1100	0	0	2006-11-21	2006-11-21	2011-11-21	1	2008-08-31	104	Minister for Culture and State Restructuring: Gopal Kiranti (CPN-M)	CPN-M (1100)	4th Quarter 2008	Statesman's Yearbook
Nepal	790	3	72	349	349001	Comprehensive Peace Agreement (Nepal)	79020061121	Government of Nepal	790	CPN-M	1100	0	0	2006-11-21	2006-11-21	2011-11-21	1	2008-08-31	104	Minister for General Administration: Pampha Bhusal (CPN-M)	CPN-M (1100)	4th Quarter 2008	Statesman's Yearbook
Nepal	790	3	72	349	349001	Comprehensive Peace Agreement (Nepal)	79020061121	Government of Nepal	790	CPN-M	1100	0	0	2006-11-21	2006-11-21	2011-11-21	1	2008-08-31	104	Minister for Information and Communications: Krishna Bahadur Mahara (CPN-M)	CPN-M (1100)	4th Quarter 2008	Statesman's Yearbook
Nepal	790	3	72	349	349001	Comprehensive Peace Agreement (Nepal)	79020061121	Government of Nepal	790	CPN-M	1100	0	0	2006-11-21	2006-11-21	2011-11-21	1	2008-08-31	104	Minster of Labour and Transportation: Lekh Raj Bhatta (CPN-M)	CPN-M (1100)	4th Quarter 2008	Statesman's Yearbook
Nepal	790	3	72	349	349001	Comprehensive Peace Agreement (Nepal)	79020061121	Government of Nepal	790	CPN-M	1100	0	0	2006-11-21	2006-11-21	2011-11-21	1	2008-08-31	104	Minister of Peace and Reconstruction: Janardan Sharma (CPN-M)	CPN-M (1100)	4th Quarter 2008	Statesman's Yearbook
Nepal	790	3	72	349	349001	Comprehensive Peace Agreement (Nepal)	79020061121	Government of Nepal	790	CPN-M	1100	0	0	2006-11-21	2006-11-21	2011-11-21	1	2008-08-31	104	Minister of Tourism and Civil Aviation: Hisila Yami (CPN-M)	CPN-M (1100)	4th Quarter 2008	Statesman's Yearbook
Nepal	790	3	72	349	349001	Comprehensive Peace Agreement (Nepal)	79020061121	Government of Nepal	790	CPN-M	1100	0	0	2006-11-21	2006-11-21	2011-11-21	1	2009-05-04	100	change in cabinet, prime minister Prachanda resigns following a dispute with the president, Ram Baran Yadav, and the army chief of staff, General Rookmangud Katawal; maoists withdraw support from the government; one principle reason for the dispute id the contentious issue of the integration process, there is no consensus on how many of the 19,000 Maoist guerrillas can or should be allowed to joi…	CPN-M (1100)	2nd Quarter 2009	-99
Nepal	790	3	72	349	349001	Comprehensive Peace Agreement (Nepal)	79020061121	Government of Nepal	790	CPN-M	1100	0	0	2006-11-21	2006-11-21	2011-11-21	1	2009-05-04	103	change in cabinet, prime minister Prachanda resigns following a dispute with the president, Ram Baran Yadav, and the army chief of staff, General Rookmangud Katawal; maoists withdraw support from the government; one principle reason for the dispute id the contentious issue of the integration process, there is no consensus on how many of the 19,000 Maoist guerrillas can or should be allowed to joi…	CPN-M (1100)	2nd Quarter 2009	-99
Nepal	790	3	72	349	349001	Comprehensive Peace Agreement (Nepal)	79020061121	Government of Nepal	790	CPN-M	1100	0	0	2006-11-21	2006-11-21	2011-11-21	1	2009-06-01	100	change in cabinet, new government: CPN (UML), the Nepali Congress, the Madhesi People's Rights Forum (MPRF) and the Terai Madhesi Loktantrik Party; deputy prime minister and home affairs, defence, finance, foreign affairs	CPN-M (1100)	3rd Quarter 2009	-99
Nepal	790	3	72	349	349001	Comprehensive Peace Agreement (Nepal)	79020061121	Government of Nepal	790	CPN-M	1100	0	0	2006-11-21	2006-11-21	2011-11-21	1	2009-06-01	103	Old Minister of Defence: Ram Bahadur Thapa (CPN-M)	CPN-M (1100)	3rd Quarter 2009	-99
Nepal	790	3	72	349	349001	Comprehensive Peace Agreement (Nepal)	79020061121	Government of Nepal	790	CPN-M	1100	0	0	2006-11-21	2006-11-21	2011-11-21	1	2009-06-01	103	Old Minister of Finance: Dr. Baburam Bhattarai (CNP-M)	CPN-M (1100)	3rd Quarter 2009	-99
Nepal	790	3	72	349	349001	Comprehensive Peace Agreement (Nepal)	79020061121	Government of Nepal	790	CPN-M	1100	0	0	2006-11-21	2006-11-21	2011-11-21	1	2009-06-01	103	Old Minister of Law, Justice and Constitutional Affairs: Dev Prasad Grugung (CPN-M)	CPN-M (1100)	3rd Quarter 2009	-99
Nepal	790	3	72	349	349001	Comprehensive Peace Agreement (Nepal)	79020061121	Government of Nepal	790	CPN-M	1100	0	0	2006-11-21	2006-11-21	2011-11-21	1	2009-06-01	105	Old Minister for Women, Children and Social Affairs: Pushpa Kamal Dahal / Comrade Prachanda: leader of the CPN (M)	CPN-M (1100)	3rd Quarter 2009	-99
Nepal	790	3	72	349	349001	Comprehensive Peace Agreement (Nepal)	79020061121	Government of Nepal	790	CPN-M	1100	0	0	2006-11-21	2006-11-21	2011-11-21	1	2009-06-01	105	Old Minister for Land Reform and Management: Pushpa Kamal Dahal / Comrade Prachanda: leader of the CPN (M)	CPN-M (1100)	3rd Quarter 2009	-99
Nepal	790	3	72	349	349001	Comprehensive Peace Agreement (Nepal)	79020061121	Government of Nepal	790	CPN-M	1100	0	0	2006-11-21	2006-11-21	2011-11-21	1	2009-06-01	105	Old Minister for Culture and State Restructuring: Gopal Kiranti (CPN-M)	CPN-M (1100)	3rd Quarter 2009	-99
Nepal	790	3	72	349	349001	Comprehensive Peace Agreement (Nepal)	79020061121	Government of Nepal	790	CPN-M	1100	0	0	2006-11-21	2006-11-21	2011-11-21	1	2009-06-01	105	Old Minister for General Administration: Pampha Bhusal (CNP-M)	CPN-M (1100)	3rd Quarter 2009	-99
Nepal	790	3	72	349	349001	Comprehensive Peace Agreement (Nepal)	79020061121	Government of Nepal	790	CPN-M	1100	0	0	2006-11-21	2006-11-21	2011-11-21	1	2009-06-01	105	Old Minister for Information and Communications: Krishna Bahadur Mahara (CPN-M)	CPN-M (1100)	3rd Quarter 2009	-99
Nepal	790	3	72	349	349001	Comprehensive Peace Agreement (Nepal)	79020061121	Government of Nepal	790	CPN-M	1100	0	0	2006-11-21	2006-11-21	2011-11-21	1	2009-06-01	105	Old Minster of Labour and Transportation: Lekh Raj Bhatta (CPN-M)	CPN-M (1100)	3rd Quarter 2009	-99
Nepal	790	3	72	349	349001	Comprehensive Peace Agreement (Nepal)	79020061121	Government of Nepal	790	CPN-M	1100	0	0	2006-11-21	2006-11-21	2011-11-21	1	2009-06-01	105	Old Minister of Peace and Reconstruction: Janardan Sharma (CPN-M)	CPN-M (1100)	3rd Quarter 2009	-99
Nepal	790	3	72	349	349001	Comprehensive Peace Agreement (Nepal)	79020061121	Government of Nepal	790	CPN-M	1100	0	0	2006-11-21	2006-11-21	2011-11-21	1	2009-06-01	105	Old Minister of Tourism and Civil Aviation: Hisila Yami (CPN-M)	CPN-M (1100)	3rd Quarter 2009	-99
Nepal	790	3	72	349	349001	Comprehensive Peace Agreement (Nepal)	79020061121	Government of Nepal	790	CPN-M	1100	0	0	2006-11-21	2006-11-21	2011-11-21	1	2011-01-22	267	military integration: UCPN (M) leader Dahal hands command of party's combatants over to the government	CPN-M (1100)	-99	The Associated Press, 22.01.2011, The New York Times, 23.01.2011
Nepal	790	3	72	349	349001	Comprehensive Peace Agreement (Nepal)	79020061121	Government of Nepal	790	CPN-M	1100	0	0	2006-11-21	2006-11-21	2011-11-21	3	2011-04-15	100	change in cabinet: Defence, Education, Energy, Finance, Information & communications, Labour & transport management, Local development, Peace & reconstruction, Foreign affairs and Home affairs still vacant; CPN (UML): 12 ministers, UCPN (M): 4 ministers; dissent over how to distribute the most powerful ministries; future of the estimated 19,000 former rebel fighters still one of the most contenti…	CPN-M (1100)	2nd Quarter 2011	-99
Nepal	790	3	72	349	349001	Comprehensive Peace Agreement (Nepal)	79020061121	Government of Nepal	790	CPN-M	1100	0	0	2006-11-21	2006-11-21	2011-11-21	3	2011-04-15	104	Minister of Information & communications - Krishna Bahadur Mahara-UCPN (M)	CPN-M (1100)	2nd Quarter 2011	-99
Nepal	790	3	72	349	349001	Comprehensive Peace Agreement (Nepal)	79020061121	Government of Nepal	790	CPN-M	1100	0	0	2006-11-21	2006-11-21	2011-11-21	3	2011-04-15	104	Minster of Labour & transport management - Top Bahadur Rayamajhi-UCPN (M)	CPN-M (1100)	2nd Quarter 2011	-99
Nepal	790	3	72	349	349001	Comprehensive Peace Agreement (Nepal)	79020061121	Government of Nepal	790	CPN-M	1100	0	0	2006-11-21	2006-11-21	2011-11-21	3	2011-04-15	104	Minister of Peace & reconstruction - Barshaman Pun-UCPN (M)	CPN-M (1100)	2nd Quarter 2011	-99
Nepal	790	3	72	349	349001	Comprehensive Peace Agreement (Nepal)	79020061121	Government of Nepal	790	CPN-M	1100	0	0	2006-11-21	2006-11-21	2011-11-21	3	2011-05-15	100	change in cabinet: ministries of Foreign affairs, Home affairs, Information & communications; Krishna Bahadur Mahara's appointment was a controversial decision	CPN-M (1100)	3rd Quarter 2011	-99
Nepal	790	3	72	349	349001	Comprehensive Peace Agreement (Nepal)	79020061121	Government of Nepal	790	CPN-M	1100	0	0	2006-11-21	2006-11-21	2011-11-21	3	2011-05-15	102	Minister of Home Affairs: Krishna Bahadur Mahara (UCPN-M)	CPN-M (1100)	3rd Quarter 2011	-99
Nepal	790	3	72	349	349001	Comprehensive Peace Agreement (Nepal)	79020061121	Government of Nepal	790	CPN-M	1100	0	0	2006-11-21	2006-11-21	2011-11-21	1	2011-08-29	100	change in cabinet, new prime minister elected, appointment of cabinet (12 ministers) which is split fairly evenly between 7 Maoists and 8 members of the United Democratic Madhesi Front (UDMF, an alliance of Madhesi parties); Prime minister - Baburam Bhattaraió UCPN (M), Education, Energy, Finance, Foreign affairs, Home affairs, Information & communications, Labour & transport management - Vacant,…	CPN-M (1100)	4th Quarter 2011	-99
Nepal	790	3	72	349	349001	Comprehensive Peace Agreement (Nepal)	79020061121	Government of Nepal	790	CPN-M	1100	0	0	2006-11-21	2006-11-21	2011-11-21	1	2011-08-29	102	Prime minister: new elected minister Baburam Bhattarai UCPN (M)	CPN-M (1100)	4th Quarter 2011	-99
Nepal	790	3	72	349	349001	Comprehensive Peace Agreement (Nepal)	79020061121	Government of Nepal	790	CPN-M	1100	0	0	2006-11-21	2006-11-21	2011-11-21	1	2011-08-29	102	Minister of Finance - Barshaman Pun UCPN (M)	CPN-M (1100)	4th Quarter 2011	-99
Nepal	790	3	72	349	349001	Comprehensive Peace Agreement (Nepal)	79020061121	Government of Nepal	790	CPN-M	1100	0	0	2006-11-21	2006-11-21	2011-11-21	1	2011-08-29	102	Minister of Foreign affairs - Narayan Kaji Shrestha UCPN (M)	CPN-M (1100)	4th Quarter 2011	-99
Nepal	790	3	72	349	349001	Comprehensive Peace Agreement (Nepal)	79020061121	Government of Nepal	790	CPN-M	1100	0	0	2006-11-21	2006-11-21	2011-11-21	1	2011-08-29	103	Old Minister of Home Affairs: Krishna Bahadur Mahara (UCPN-M); new Minister of Home affairs - Bijaya Kumar Gachchhadar MPRF	CPN-M (1100)	4th Quarter 2011	-99
Nepal	790	3	72	349	349001	Comprehensive Peace Agreement (Nepal)	79020061121	Government of Nepal	790	CPN-M	1100	0	0	2006-11-21	2006-11-21	2011-11-21	1	2011-08-29	104	Minister of Education - Posta Bahadur Bogati UCPN (M)	CPN-M (1100)	4th Quarter 2011	-99
Nepal	790	3	72	349	349001	Comprehensive Peace Agreement (Nepal)	79020061121	Government of Nepal	790	CPN-M	1100	0	0	2006-11-21	2006-11-21	2011-11-21	1	2011-08-29	104	Minister for Energy - Posta Bahadur Bogati UCPN (M)	CPN-M (1100)	4th Quarter 2011	-99
Nepal	790	3	72	349	349001	Comprehensive Peace Agreement (Nepal)	79020061121	Government of Nepal	790	CPN-M	1100	0	0	2006-11-21	2006-11-21	2011-11-21	1	2011-08-29	104	Minister for Land Reform: Prabhu Sah UCPN(M)	CPN-M (1100)	4th Quarter 2011	-99
Nepal	790	3	72	349	349001	Comprehensive Peace Agreement (Nepal)	79020061121	Government of Nepal	790	CPN-M	1100	0	0	2006-11-21	2006-11-21	2011-11-21	1	2011-08-29	105	Old Minister of Information & communications - Krishna Bahadur Mahara-UCPN (M); new Minister of Information & communications - Jaya Prakash Prasad Gupta MPRF	CPN-M (1100)	4th Quarter 2011	-99
Nepal	790	3	72	349	349001	Comprehensive Peace Agreement (Nepal)	79020061121	Government of Nepal	790	CPN-M	1100	0	0	2006-11-21	2006-11-21	2011-11-21	1	2011-08-29	105	Old Minster of Labour & transport management - Top Bahadur Rayamajhi-UCPN (M); new: vacant	CPN-M (1100)	4th Quarter 2011	-99
Nepal	790	3	72	349	349001	Comprehensive Peace Agreement (Nepal)	79020061121	Government of Nepal	790	CPN-M	1100	0	0	2006-11-21	2006-11-21	2011-11-21	3	2011-10-15	100	change in cabinet: defence minister and land reform minister dismissed	CPN-M (1100)	4th Quarter 2011	-99
Nepal	790	3	72	349	349001	Comprehensive Peace Agreement (Nepal)	79020061121	Government of Nepal	790	CPN-M	1100	0	0	2006-11-21	2006-11-21	2011-11-21	3	2011-10-15	105	Old Minister for Land Reform: Prabhu Sah UCPN(M)	CPN-M (1100)	4th Quarter 2011	-99
Nepal	790	3	72	349	349001	Comprehensive Peace Agreement (Nepal)	79020061121	Government of Nepal	790	CPN-M	1100	0	0	2006-11-21	2006-11-21	2011-11-21	1	2011-11-20	267	military integration: regrouping on different categories as per wish, interview trend: 70 percent opt for integration, number could go beyond the maximum of 6.500; Figures of two days (19./20.11.2011) Integration: 1224 (Voluntary Retirement: 555, Rehabilitation: 0, Total: 1779)	CPN-M (1100)	-99	eKantipur.com, 21.11.2011, Xinhua General News Service, 21.11.2011
Nepal	790	3	72	349	349001	Comprehensive Peace Agreement (Nepal)	79020061121	Government of Nepal	790	CPN-M	1100	0	0	2006-11-21	2006-11-21	2011-11-21	1	2011-11-21	2	end of 5-year period	-99	-99	UCDP
Cambodia	811	3	103	364	364001	The Paris Agreement	81119911023	Government of Cambodia	811	KR	1112	1	0	1991-10-23	1991-10-23	1992-06-30	1	1991-10-23	1	PA signature	Government of Cambodia (811), KR (1112)	-99	PSED_promises
Cambodia	811	3	103	364	364001	The Paris Agreement	81119911023	Government of Cambodia	811	KR	1112	1	0	1991-10-23	1991-10-23	1992-06-30	4	1992-06-30	3	civil conflict recurrence	Government of Cambodia (811), KR (1112)	-99	UCDP Encyclopedia
Cambodia	811	3	103	378	378001	The Paris Agreement	81119911023	Government of Cambodia	811	KPNLF	1114	1	0	1991-10-23	1991-10-23	1996-10-23	1	1991-10-23	1	PA signature	Government of Cambodia (811), KR (1112)	-99	PSED_promises
Cambodia	811	3	103	378	378001	The Paris Agreement	81119911023	Government of Cambodia	811	KPNLF	1114	1	0	1991-10-23	1991-10-23	1996-10-23	1	1992-08-12	500	proportional representation: law is introduced	-99	-99	IPU PARLINE: http://www.ipu.org/parline-e/reports/2051_B.htm
Cambodia	811	3	103	378	378001	The Paris Agreement	81119911023	Government of Cambodia	811	KPNLF	1114	1	0	1991-10-23	1991-10-23	1996-10-23	1	1993-04-28	504	parliamentary elections: results (10.06.1993): Funcinpec 45,2 %; CPP 38,6 %; BLDP 3,8 % [EIU does not give official date, date is amended]	-99	1993 2nd	-99
Cambodia	811	3	103	378	378001	The Paris Agreement	81119911023	Government of Cambodia	811	KPNLF	1114	1	0	1991-10-23	1991-10-23	1996-10-23	2	1993-06-16	200	military power-sharing: Hun Sen announced general; FUNCINPEC leader announced general	KPNLF (1114)	-99	Business Times 22.06.1993
Cambodia	811	3	103	378	378001	The Paris Agreement	81119911023	Government of Cambodia	811	KPNLF	1114	1	0	1991-10-23	1991-10-23	1996-10-23	1	1993-09-24	507	constitution: New constitution enacted by Constitution Assembly (113 votes to 5)	-99	1993 4th	-99
Cambodia	811	3	103	378	378001	The Paris Agreement	81119911023	Government of Cambodia	811	KPNLF	1114	1	0	1991-10-23	1991-10-23	1996-10-23	1	1996-10-23	2	end of 5-year period	-99	-99	UCDP
Cambodia	811	3	103	379	379001	The Paris Agreement	81119911023	Government of Cambodia	811	FUNCINPEC	1115	1	0	1991-10-23	1991-10-23	1996-10-23	1	1991-10-23	1	PA signature	Government of Cambodia (811), KR (1112)	-99	PSED_promises
Cambodia	811	3	103	379	379001	The Paris Agreement	81119911023	Government of Cambodia	811	FUNCINPEC	1115	1	0	1991-10-23	1991-10-23	1996-10-23	1	1992-08-12	500	proportional representation: law is introduced	-99	-99	IPU PARLINE: http://www.ipu.org/parline-e/reports/2051_B.htm
Cambodia	811	3	103	379	379001	The Paris Agreement	81119911023	Government of Cambodia	811	FUNCINPEC	1115	1	0	1991-10-23	1991-10-23	1996-10-23	1	1993-04-28	504	parliamentary elections: results (10.06.1993): Funcinpec 45,2 %; CPP 38,6 %; BLDP 3,8 % [EIU does not give official date, date is amended]	-99	1993 2nd	-99
Cambodia	811	3	103	379	379001	The Paris Agreement	81119911023	Government of Cambodia	811	FUNCINPEC	1115	1	0	1991-10-23	1991-10-23	1996-10-23	2	1993-06-16	200	military power-sharing: Hun Sen announced general; FUNCINPEC leader announced general	FUNCINPEC (1115)	-99	Business Times 22.06.1993
Cambodia	811	3	103	379	379001	The Paris Agreement	81119911023	Government of Cambodia	811	FUNCINPEC	1115	1	0	1991-10-23	1991-10-23	1996-10-23	1	1993-09-24	507	constitution: New constitution enacted by Constitution Assembly (113 votes to 5)	-99	1993 4th	-99
Cambodia	811	3	103	379	379001	The Paris Agreement	81119911023	Government of Cambodia	811	FUNCINPEC	1115	1	0	1991-10-23	1991-10-23	1996-10-23	1	1993-10-29	100	General Tea Banh and Tea Chamra new defense minister; Sar Kheng and Yuhok Kry new interior ministers; Ieng Mouly new information minister	FUNCINPEC (1115)	1993 4th	-99
Cambodia	811	3	103	379	379001	The Paris Agreement	81119911023	Government of Cambodia	811	FUNCINPEC	1115	1	0	1991-10-23	1991-10-23	1996-10-23	1	1993-10-29	102	New Prime Minster: Prince Ranariddh (FUNCINPEC)	FUNCINPEC (1115)	-99	Statesman's Yearbook
Cambodia	811	3	103	379	379001	The Paris Agreement	81119911023	Government of Cambodia	811	FUNCINPEC	1115	1	0	1991-10-23	1991-10-23	1996-10-23	1	1993-10-29	102	New Finance Minister: Sam Rainsy (FUNCINPEC)	FUNCINPEC (1115)	-99	Statesman's Yearbook
Cambodia	811	3	103	379	379001	The Paris Agreement	81119911023	Government of Cambodia	811	FUNCINPEC	1115	1	0	1991-10-23	1991-10-23	1996-10-23	1	1993-10-29	102	New Minister of Foreign Affairs: Prince Norodm Sirivudh (FUNCINPEC)	FUNCINPEC (1115)	-99	Statesman's Yearbook
Cambodia	811	3	103	379	379001	The Paris Agreement	81119911023	Government of Cambodia	811	FUNCINPEC	1115	1	0	1991-10-23	1991-10-23	1996-10-23	1	1993-10-29	102	New Deputy Prime Minister: Prince Norodm Sirivudh (FUNCINPEC)	FUNCINPEC (1115)	-99	Statesman's Yearbook
Cambodia	811	3	103	379	379001	The Paris Agreement	81119911023	Government of Cambodia	811	FUNCINPEC	1115	1	0	1991-10-23	1991-10-23	1996-10-23	1	1994-10-20	100	cabinet change: Sam Rainsy replaced by Keat Chhon as finance minister; Prince Sirivudh replaced by Ung Huot as foreign minister; Ung Huot replaced by Tol Loah as education minister; Prince Sirivudh replaced by Ing Kieth as deputy prime minister; Kong Sam Ol replaced by Tao Seng Hour as agriculture minister; Var Huot replaced by Cham Prasidh as trade minister; four new ministries (no names given i…	FUNCINPEC (1115)	1994 4th	-99
Cambodia	811	3	103	379	379001	The Paris Agreement	81119911023	Government of Cambodia	811	FUNCINPEC	1115	1	0	1991-10-23	1991-10-23	1996-10-23	1	1994-10-20	103	Old Finance Minister: Sam Rainsy (FUNCINPEC)	FUNCINPEC (1115)	1994 4th	-99
Cambodia	811	3	103	379	379001	The Paris Agreement	81119911023	Government of Cambodia	811	FUNCINPEC	1115	1	0	1991-10-23	1991-10-23	1996-10-23	1	1994-10-20	104	New Minister of Agriculture, Forestry and Fisheries Minister: Tao Seng Hour (FUNCIPEC)	FUNCINPEC (1115)	1994 4th	-99
Cambodia	811	3	103	379	379001	The Paris Agreement	81119911023	Government of Cambodia	811	FUNCINPEC	1115	1	0	1991-10-23	1991-10-23	1996-10-23	1	1996-10-23	2	end of 5-year period	-99	-99	UCDP
Philippines	840	3	10	220	220001	General Agreement for Peace between the Government of the Republic of the Philippines and the Rebolusyonaryong Alyansang Makabansa - Soldiers of the Filipino People - Young Officers' Union	84019951013	Government of Philippines	840	Forces of Honasan, Abenina & Zumel	1011	0	0	1990-12-31	1995-10-13	2000-10-13	1	1995-10-13	1	PA signature	Government of Philippines (840), Forces of Honasan, Abenina & Zumel (1011)	-99	PSED_promises
Philippines	840	3	10	220	220001	General Agreement for Peace between the Government of the Republic of the Philippines and the Rebolusyonaryong Alyansang Makabansa - Soldiers of the Filipino People - Young Officers' Union	84019951013	Government of Philippines	840	Forces of Honasan, Abenina & Zumel	1011	0	0	1990-12-31	1995-10-13	2000-10-13	4	1998-05-01	500	proportional representation: law is introduced (exact date unknown, therefore edateprec=4, as event needs to take place before the elections edate is set to 01/05/1998)	-99	-99	Xinhua News Agency, MAY 11, 1998
Philippines	840	3	10	220	220001	General Agreement for Peace between the Government of the Republic of the Philippines and the Rebolusyonaryong Alyansang Makabansa - Soldiers of the Filipino People - Young Officers' Union	84019951013	Government of Philippines	840	Forces of Honasan, Abenina & Zumel	1011	0	0	1990-12-31	1995-10-13	2000-10-13	1	1998-05-11	504	parliamentary elections	-99	1998-3rd quarter	-99
Philippines	840	3	10	220	220001	General Agreement for Peace between the Government of the Republic of the Philippines and the Rebolusyonaryong Alyansang Makabansa - Soldiers of the Filipino People - Young Officers' Union	84019951013	Government of Philippines	840	Forces of Honasan, Abenina & Zumel	1011	0	0	1990-12-31	1995-10-13	2000-10-13	1	1998-05-11	505	presidential elections: Joseph Estrada, candidate of the opposition coalition, Laban ng Makabayang Masang Pilipino (LAMMP)won the presidential election (40%). Gloria Macapagal Arroyo, candidate of Lakas ng Edsa-National Union of Christian Democrats (Lakas), won the vice-presidential election (50%)	-99	1998-3rd quarter	-99
Philippines	840	3	10	220	220001	General Agreement for Peace between the Government of the Republic of the Philippines and the Rebolusyonaryong Alyansang Makabansa - Soldiers of the Filipino People - Young Officers' Union	84019951013	Government of Philippines	840	Forces of Honasan, Abenina & Zumel	1011	0	0	1990-12-31	1995-10-13	2000-10-13	4	1999-12-01	267	military integration: former rebel is general	Forces of Honasan, Abenina & Zumel (1011)	-99	BusinessWorld 01.12.1999
Philippines	840	3	10	220	220001	General Agreement for Peace between the Government of the Republic of the Philippines and the Rebolusyonaryong Alyansang Makabansa - Soldiers of the Filipino People - Young Officers' Union	84019951013	Government of Philippines	840	Forces of Honasan, Abenina & Zumel	1011	0	0	1990-12-31	1995-10-13	2000-10-13	4	1999-12-01	200	military power-sharing: former rebel is general	Forces of Honasan, Abenina & Zumel (1011)	-99	BusinessWorld 01.12.1999
Philippines	840	3	10	220	220001	General Agreement for Peace between the Government of the Republic of the Philippines and the Rebolusyonaryong Alyansang Makabansa - Soldiers of the Filipino People - Young Officers' Union	84019951013	Government of Philippines	840	Forces of Honasan, Abenina & Zumel	1011	0	0	1990-12-31	1995-10-13	2000-10-13	1	2000-10-13	2	end of 5-year period	-99	-99	UCDP
Philippines	840	3	112	247	247001	Mindanao Final Agreement	84019960902	Government of Philippines	840	MNLF	1117	0	1	1993-12-31	1996-09-02	2001-09-02	1	1996-09-02	1	PA signature	Government of Philippines (840), MNLF (1117)	-99	PSED_promises
Philippines	840	3	112	247	247001	Mindanao Final Agreement	84019960902	Government of Philippines	840	MNLF	1117	0	1	1993-12-31	1996-09-02	2001-09-02	4	1997-01-15	302	economic power-sharing: economic commission implemented /// announcement of rebel leader Nur Misuari for economic commission	MNLF (1117)	1997-1st quarter	-99
Philippines	840	3	112	247	247001	Mindanao Final Agreement	84019960902	Government of Philippines	840	MNLF	1117	0	1	1993-12-31	1996-09-02	2001-09-02	1	1997-03-18	267	military integration: 1100 to army special force	MNLF (1117)	-99	Xinhua News Agency 19.03.1997
Philippines	840	3	112	247	247001	Mindanao Final Agreement	84019960902	Government of Philippines	840	MNLF	1117	0	1	1993-12-31	1996-09-02	2001-09-02	1	1998-03-01	267	military integration: 2155 former rebels (3255 in total now)	MNLF (1117)	-99	BusinessWorld 02.03.1998
Philippines	840	3	112	247	247001	Mindanao Final Agreement	84019960902	Government of Philippines	840	MNLF	1117	0	1	1993-12-31	1996-09-02	2001-09-02	4	1998-05-01	500	proportional representation: law is introduced (exact date unknown, therefore edateprec=4, as event needs to take place before the elections edate is set to 01/05/1998)	-99	-99	Xinhua News Agency, MAY 11, 1998
Philippines	840	3	112	247	247001	Mindanao Final Agreement	84019960902	Government of Philippines	840	MNLF	1117	0	1	1993-12-31	1996-09-02	2001-09-02	1	1998-05-11	504	parliamentary elections	-99	1998-3rd quarter	-99
Philippines	840	3	112	247	247001	Mindanao Final Agreement	84019960902	Government of Philippines	840	MNLF	1117	0	1	1993-12-31	1996-09-02	2001-09-02	1	1998-05-11	505	presidential elections: Joseph Estrada, candidate of the opposition coalition, Laban ng Makabayang Masang Pilipino (LAMMP)won the presidential election (40%). Gloria Macapagal Arroyo, candidate of Lakas ng Edsa-National Union of Christian Democrats (Lakas), won the vice-presidential election (50%)	-99	1998-3rd quarter	-99
Philippines	840	3	112	247	247001	Mindanao Final Agreement	84019960902	Government of Philippines	840	MNLF	1117	0	1	1993-12-31	1996-09-02	2001-09-02	1	1998-10-08	267	military integration: 105 after former rebels received training	MNLF (1117)	-99	Associated Press Worldstream 08.10.1998
Philippines	840	3	112	247	247001	Mindanao Final Agreement	84019960902	Government of Philippines	840	MNLF	1117	0	1	1993-12-31	1996-09-02	2001-09-02	4	2000-06-07	267	military integration: in total: 5000 former MNFL-members into army; 1000 former MNLF-members into police	MNLF (1117)	-99	BusinessWorld 07.06.2000
Philippines	840	3	112	247	247001	Mindanao Final Agreement	84019960902	Government of Philippines	840	MNLF	1117	0	1	1993-12-31	1996-09-02	2001-09-02	1	2001-05-14	504	parliamentary elections	-99	2001-July	-99
Philippines	840	3	112	247	247001	Mindanao Final Agreement	84019960902	Government of Philippines	840	MNLF	1117	0	1	1993-12-31	1996-09-02	2001-09-02	1	2001-08-14	402	territorial power-sharing: autonomy, referendum taking place, Only one province (Basilan) and two cities (Marawi and Cotabato) voted for inclusion in the ARMM (referendum to inclusion into ARMM of cities and regions)		2001-October	-99
[truncated: 20 more rows]
