# Supplementary material
Source: publisher figshare collection journal article supplement (https://sage.figshare.com/ndownloader/files/14729102)
Supplement: Supplementary file 5 [file 14729102 › replication_archive/data/external_input/uds_summary.csv]

country	year	cowcode	mean	sd	median	pct025	pct975
United States	1946	2	1.08643107761851	0.296274405770014	1.07274259270086	0.542473403241167	1.69406325813639
United States	1947	2	1.09442279054741	0.298953843247262	1.07798706125057	0.551630136021993	1.71977057601791
United States	1948	2	1.05004041342522	0.260401632652926	1.03892682260955	0.564254990768261	1.58878284484989
United States	1949	2	1.03980097413629	0.258584460500407	1.0310480789435	0.562805592741287	1.56791242213464
United States	1950	2	1.08497098990745	0.244926430690266	1.0716098310641	0.628056883163918	1.58925314399187
United States	1951	2	1.04359106086061	0.255185711421342	1.03372227171381	0.569553045617692	1.57714981850307
United States	1952	2	1.04461114512694	0.260419516146881	1.03866684982027	0.553398571660752	1.56325623178811
United States	1953	2	1.04947742637604	0.263416733653454	1.04232678529472	0.55457644487946	1.58594884555179
United States	1954	2	1.04452452719641	0.256971160748851	1.03171519881153	0.573335429026566	1.57719893211096
United States	1955	2	1.08880937264027	0.246571412084692	1.08167078504404	0.629373433095758	1.59772263596033
United States	1956	2	1.04655044411753	0.257602723307883	1.03156883104193	0.570698673730814	1.58238061976468
United States	1957	2	1.04714727493855	0.257656871542699	1.03694171623415	0.563200081620129	1.57580629818644
United States	1958	2	1.04620359744582	0.25573847580617	1.03305167003621	0.572701417853148	1.5982630621499
United States	1959	2	1.05108348085857	0.263979658874022	1.04159093168931	0.551233674099509	1.59990775151627
United States	1960	2	1.08416003011907	0.247545739124409	1.07615735260429	0.642310865324676	1.61855269700341
United States	1961	2	1.04396781119453	0.259732174265956	1.03710912745973	0.557272778390117	1.57744881271521
United States	1962	2	1.27185917597481	0.279992142545159	1.25744665458767	0.750694170705634	1.83719198119129
United States	1963	2	1.04531774217152	0.256791114056637	1.0393329813543	0.559341389788024	1.56591698020614
United States	1964	2	0.947973015694091	0.251740290833799	0.938182341793671	0.481653419188893	1.46544780284887
United States	1965	2	1.20336731222015	0.263211123252289	1.19273787744342	0.721027228660388	1.76888525571301
United States	1966	2	0.953904433221895	0.246979432089347	0.944744788299435	0.494558695126677	1.45166397400728
United States	1967	2	1.16684506272319	0.272135606551233	1.15577144658969	0.658188084142628	1.71783971335308
United States	1968	2	1.3940079074135	0.301262610975597	1.38198336907999	0.828765135620036	2.03045504735833
United States	1969	2	1.41022185847167	0.300498907105355	1.39586289045148	0.850032719637067	2.02809111355696
United States	1970	2	1.14752743748459	0.265392171067787	1.13766323312767	0.652483042977899	1.69369971810661
United States	1971	2	1.15039252842998	0.273717888981534	1.1434099763675	0.637140346080327	1.70149877758583
United States	1972	2	1.13096451019843	0.227737942157117	1.12246733597791	0.708632883799794	1.61089109626431
United States	1973	2	1.31418585268993	0.245805154411728	1.30185048590727	0.864578182339586	1.834129516666
United States	1974	2	1.31750770548793	0.24945304002217	1.31249136674484	0.841539500742124	1.82260861703383
United States	1975	2	1.31229220664334	0.245556603257551	1.30567203304882	0.859359789007591	1.82504140854269
United States	1976	2	1.40782697497547	0.260409098612615	1.39850217277854	0.932783275514875	1.95220075746584
United States	1977	2	1.40761078663311	0.264312291151872	1.40085129180413	0.924637738135014	1.9539544672289
United States	1978	2	1.21403903367192	0.238010196021497	1.2070146781334	0.772139032977878	1.69361144285258
United States	1979	2	1.05570747897953	0.216349689811304	1.04656010010984	0.648588602331958	1.50483609679064
United States	1980	2	1.14799778365277	0.217330010658012	1.14027529044742	0.742685842252093	1.58692143488882
United States	1981	2	1.12675442054028	0.226120103922445	1.11772995174485	0.720813683236605	1.60537328362038
United States	1982	2	1.12530315759182	0.219873563521736	1.11698908217308	0.711090191755437	1.56634982046015
United States	1983	2	1.39286853053274	0.279419987881304	1.38037315884339	0.877519527689096	1.992110426844
United States	1984	2	1.2875817274475	0.268468256483402	1.27702019335379	0.78964408143165	1.81697358723887
United States	1985	2	1.30513705503275	0.254705612615416	1.29214571207785	0.845635524234578	1.84649562020117
United States	1986	2	1.28243435590912	0.276179488876603	1.27005411106669	0.781880360569671	1.86422665005494
United States	1987	2	1.28117732921332	0.271171852099439	1.27062661292296	0.777269751145254	1.84787992470282
United States	1988	2	1.39741573359142	0.281731176130233	1.38656825194918	0.881445822009412	1.98301832922516
United States	1989	2	1.40479150218094	0.287534272350026	1.39265061467429	0.887235187217106	2.00047209472107
United States	1990	2	1.554890333067	0.310073154346375	1.53855684447263	0.982010424239872	2.20351314289896
United States	1991	2	1.54602211810943	0.30788537006154	1.53684312555892	0.976594409478625	2.16984204011437
United States	1992	2	1.9897501250189	0.468129789680551	1.94005436390891	1.20967270868071	3.01595803438487
United States	1993	2	1.98867617951973	0.473400686195041	1.93215128227496	1.21962993061154	3.04718658568977
United States	1994	2	1.99243082612972	0.467125886837414	1.94546319912949	1.21608258341584	3.04393026013226
United States	1995	2	1.99410506329995	0.469043270272222	1.94330906033768	1.21755580126087	3.04080462663052
United States	1996	2	1.55886657435388	0.316671981663151	1.54155309813693	0.996031811707271	2.23968324484759
United States	1997	2	1.55590786592725	0.311908501539233	1.53727845717307	0.993617442267526	2.22134283237759
United States	1998	2	1.56044414180657	0.31532832108217	1.53951111039215	0.987572144644801	2.21446467866966
United States	1999	2	1.5554602638336	0.308200247545327	1.53628564217663	0.986397836695673	2.18403286635454
United States	2000	2	1.56157273795207	0.29915211003759	1.54168701639847	1.02105834998627	2.20990001248998
United States	2001	2	1.55954085496408	0.307292087197221	1.54418174181519	1.00201084203054	2.21572869279378
United States	2002	2	1.54434090787412	0.312531521334682	1.53024155849903	0.971115801878289	2.19514248484768
United States	2003	2	1.56731318168568	0.316056126559393	1.55071033530803	0.999673780175555	2.22143582677687
United States	2004	2	1.55878124816013	0.311624823183092	1.54252119711037	0.990033643713789	2.2137539637901
United States	2005	2	1.54963341600062	0.309354801999375	1.53582667477758	0.980637739421817	2.20798036664421
United States	2006	2	1.55154766665115	0.218774659624852	1.54597662695739	1.13548442176427	1.99724398579764
United States	2007	2	1.55330661370822	0.313190690189345	1.53655217792785	0.977310710769656	2.20175605916016
United States	2008	2	1.55661110050543	0.217998218077314	1.55153204727477	1.15242665562419	2.00116545921049
United States	2009	2	1.56032802424807	0.31687233391974	1.53672254680687	0.999229557422966	2.2398991022519
United States	2010	2	1.55940738727642	0.215361016853141	1.55608898399249	1.14148204904769	1.99470502924886
United States	2011	2	1.57614874667748	0.248307688859492	1.56766575480034	1.11663393807704	2.09390571392077
United States	2012	2	1.56476506037403	0.251451937487056	1.55813523682891	1.08792699429189	2.0702343614134
Canada	1946	20	1.21702387927575	0.310659991367767	1.20014191241436	0.65955002113065	1.87783905660016
Canada	1947	20	1.225601190675	0.318098199412375	1.20678590996381	0.665864302289798	1.90328112277833
Canada	1948	20	1.14302378512839	0.270444299403024	1.13859411225278	0.629327985219091	1.68442012729443
Canada	1949	20	1.0412013969472	0.25432960832987	1.03003460248684	0.574219360400133	1.57002622853181
Canada	1950	20	1.08673229867079	0.246597778847115	1.07618033730647	0.638673948161904	1.60780613765245
Canada	1951	20	1.04436570412574	0.260827240881006	1.03348941932357	0.559630413257835	1.57387385035798
Canada	1952	20	1.04483732059097	0.259369583364558	1.04469224912386	0.557191570015601	1.57724214594003
Canada	1953	20	0.950632373475921	0.24645729035231	0.943956127097785	0.487056942977948	1.45399853259012
Canada	1954	20	0.947170902823213	0.248422800913579	0.936498420494184	0.482940586665156	1.46342143818562
Canada	1955	20	0.999733172689929	0.236874972213052	0.989543479945161	0.565596579012287	1.49362687770021
Canada	1956	20	0.945246547260803	0.246973513728191	0.93611024759069	0.486359789778672	1.45736198569783
Canada	1957	20	1.04608444875612	0.260029830477727	1.03749593110716	0.561801169555853	1.57312341301777
Canada	1958	20	1.04249741797534	0.253404684015766	1.03613096653114	0.575543030309988	1.55170742231532
Canada	1959	20	1.04711486138038	0.254358786894248	1.03443590679912	0.58889547731334	1.57240390248789
Canada	1960	20	1.08492965192111	0.246120419540836	1.07212555927604	0.639018900111589	1.59376419600375
Canada	1961	20	1.04231838634344	0.259428338960652	1.03483026368479	0.558549693584499	1.57318542989643
Canada	1962	20	1.15233310936392	0.273980863310829	1.1513450684289	0.634798797003099	1.70701944011142
Canada	1963	20	1.05133335813403	0.260058973641654	1.04177771318159	0.566568878778311	1.58835534297071
Canada	1964	20	1.0466564939229	0.257046679942334	1.03930431394031	0.563995254847443	1.57066440387123
Canada	1965	20	1.08906472431965	0.249417918789077	1.07423812409018	0.623190735165502	1.60224806054443
Canada	1966	20	1.04693652293089	0.254838247877205	1.03037728707791	0.570866396675801	1.58008800817619
Canada	1967	20	1.28217560605684	0.283813465161852	1.26842224131531	0.773963985980619	1.86706750168597
Canada	1968	20	1.28625502923931	0.281395739446985	1.27220267029762	0.765021952475971	1.86588217147338
Canada	1969	20	1.27278205104818	0.282137581352862	1.26339566465085	0.752273672700694	1.83751045097907
Canada	1970	20	1.04129232268975	0.260044871231221	1.03671769636718	0.557020469793747	1.57064674151638
Canada	1971	20	1.27146548188696	0.282091641611798	1.26438311167166	0.760552484773304	1.87206103466464
Canada	1972	20	1.51481495350821	0.278630386692468	1.49930317429204	0.999272332551701	2.10028533481041
Canada	1973	20	1.51106731199796	0.278538069794928	1.50019614196541	0.998109572777444	2.09402194444149
Canada	1974	20	1.4059906205208	0.261364708855966	1.39640817981703	0.909320128094756	1.93899483285332
Canada	1975	20	1.40324286563272	0.258494334232185	1.39476946092435	0.921202332162876	1.93665707408687
Canada	1976	20	1.41152030240182	0.263442601745542	1.39931328794823	0.925244952771845	1.96321743068455
Canada	1977	20	1.40743345587304	0.263480764334394	1.39626912866735	0.936080245478273	1.95535380794266
Canada	1978	20	1.41058785955955	0.259012464044696	1.40164520665707	0.927831577082716	1.92944786291055
Canada	1979	20	1.51626423077793	0.273052572597221	1.49989556742814	1.01919817863244	2.08550148744925
Canada	1980	20	1.51972182116939	0.268751311803684	1.50287249657616	1.02186935523711	2.08780685764429
Canada	1981	20	1.50908409533944	0.272479159150045	1.49610677828271	1.01537848321445	2.07678587078161
Canada	1982	20	1.29568057310479	0.246474679797078	1.28753762976433	0.844905033034148	1.79683557982618
Canada	1983	20	1.39321881716891	0.284663030521658	1.37915905028682	0.875825360233845	1.98413389919941
Canada	1984	20	1.40061574591112	0.288226549969407	1.3848908178336	0.869026213380382	2.01170531899599
Canada	1985	20	1.41519634399609	0.282567503119473	1.40022676779099	0.911619287861176	2.01203619551394
Canada	1986	20	1.39803639539097	0.286794092052054	1.38279931921552	0.874720511652493	2.00674778433466
Canada	1987	20	1.39845899676391	0.283566756907721	1.38748428131492	0.87513288360101	2.00650602725964
Canada	1988	20	1.40164444701954	0.288747494720249	1.38980278517341	0.871094862427168	1.98666784613723
Canada	1989	20	1.39625291155441	0.280034597558972	1.38385931664578	0.874696245834542	1.98038030007758
Canada	1990	20	1.3906293804281	0.29225012841081	1.37746268246832	0.843256725337543	1.99490805266763
Canada	1991	20	1.40592955945865	0.287601356575976	1.39792388397932	0.874941677593798	1.99621670429856
Canada	1992	20	1.55895974894025	0.309033925581031	1.54442146823228	0.992197808287793	2.20425545927075
Canada	1993	20	1.39128879310988	0.288486919572071	1.37767150270815	0.861701624362219	1.98377650792927
Canada	1994	20	1.40260803299001	0.284847170028002	1.39439100872946	0.875575018184719	1.99288952005563
Canada	1995	20	1.39856140387498	0.282084566180766	1.38393210213863	0.889576799420838	1.99399677799202
Canada	1996	20	1.40617617321716	0.286253879658626	1.39355572848173	0.883122987936162	1.98570159841638
Canada	1997	20	1.39675906019563	0.284538912309512	1.38403277969197	0.880433074785939	1.99838359428022
Canada	1998	20	1.39688460668341	0.286754677936023	1.38249596937882	0.878809989080209	1.98761867647563
Canada	1999	20	1.39606635766536	0.285608450506621	1.38018168459866	0.877108084011549	1.98529652733875
Canada	2000	20	1.30532057242558	0.262767270786004	1.29332002952385	0.832875278192357	1.85142091503096
Canada	2001	20	1.28571401728304	0.273601020136755	1.27287606615182	0.783861089568383	1.85165176362324
Canada	2002	20	1.28634519790011	0.272591080952804	1.27639705148707	0.781098656169479	1.85836920576124
Canada	2003	20	1.27932835207612	0.268662058405367	1.27080779713754	0.770084515384993	1.83584406566726
Canada	2004	20	1.3941868762649	0.287412708600417	1.38528226433461	0.876754474694021	1.98555593629379
Canada	2005	20	1.39665626685334	0.286287146820655	1.38458881559228	0.868281925415746	2.00695325262396
Canada	2006	20	1.77029552256271	0.234596517075047	1.75986761784628	1.34148935718625	2.26528310676256
Canada	2007	20	1.39203591432916	0.287460929796931	1.37940566431483	0.87388036005196	1.98126306340685
Canada	2008	20	1.77078505556731	0.234532867099728	1.760080014028	1.33684919063431	2.25274318414139
Canada	2009	20	1.39553083907208	0.281873126912301	1.3849388331147	0.883934490761083	1.9799016581782
Canada	2010	20	1.76972281606022	0.239945438664575	1.75914147815985	1.31538898713599	2.28171046637496
Canada	2011	20	2.13893729456465	0.421840360847715	2.0821276311073	1.48925280812647	3.12970943358001
Canada	2012	20	2.14616034231947	0.422400233200124	2.0927610184717	1.48202961112945	3.14451336879696
Bahamas	1973	31	0.747656469410274	0.235098720964947	0.741026634122434	0.302617747814938	1.21382172402539
Bahamas	1974	31	0.738275039012453	0.238898516042438	0.736340718995407	0.277022874433578	1.2083848243664
Bahamas	1975	31	0.742930899295751	0.238970391808896	0.737758344479052	0.286893043049443	1.2157756292386
Bahamas	1976	31	0.744072594470665	0.23603234992003	0.735928401546465	0.298137756690496	1.21304711144272
Bahamas	1977	31	0.73958914842779	0.23871526824816	0.738286967290739	0.284066394334392	1.21598245652391
Bahamas	1978	31	0.740516256585342	0.236883987639584	0.741644049802592	0.272270951530598	1.21298249499857
Bahamas	1979	31	0.739569072279546	0.234790932782147	0.738063609793894	0.285524048083149	1.20890270240683
Bahamas	1980	31	0.824903409284254	0.216943096741654	0.820851584738182	0.404800360060998	1.25430457604369
Bahamas	1981	31	0.744496475521863	0.236133403611295	0.73961174199655	0.292350875261603	1.21645248176451
Bahamas	1982	31	0.831904501066679	0.239621276312972	0.827811492147271	0.373027256943518	1.31062643088614
Bahamas	1983	31	0.67765735450359	0.256746216215245	0.670612715738137	0.189288115171444	1.18592302886312
Bahamas	1984	31	0.673885630040027	0.255008440281621	0.6659740552656	0.201183038388888	1.18214832654905
Bahamas	1985	31	0.51993689638399	0.194394757997198	0.51703706802013	0.157181086755826	0.909758507502255
Bahamas	1986	31	0.677056529287058	0.255583992599071	0.666572267593834	0.201203278721079	1.19888233796365
Bahamas	1987	31	0.562854726605474	0.248312720037768	0.556977513521015	0.0874080660861298	1.06530557833213
Bahamas	1988	31	0.704828195667631	0.203773294979638	0.696559337968429	0.324267748949085	1.14032243438253
Bahamas	1989	31	0.565332298416675	0.245656886164102	0.561619713111782	0.100530261489114	1.05819181219256
Bahamas	1990	31	0.556978692570217	0.246890611741754	0.553685290635681	0.0868579425005858	1.05211855851551
Bahamas	1991	31	0.554023143280386	0.2438760992889	0.551319951577352	0.0991379866634146	1.05045899951014
Bahamas	1992	31	0.82026401224147	0.265444253412881	0.816308622629505	0.324212939354889	1.35675629151316
Bahamas	1993	31	0.817090019753898	0.265904537397422	0.807183992365791	0.318519934908531	1.35332721319646
Bahamas	1994	31	0.815483760996478	0.262826799424189	0.816191415768019	0.304486981342568	1.33977297364397
Bahamas	1995	31	0.825747224189986	0.263896548742273	0.825177390727157	0.318774236295725	1.35614184487323
Bahamas	1996	31	0.818327951973043	0.25744489093368	0.814729884798185	0.322785173012054	1.32881977287056
Bahamas	1997	31	0.82267177077596	0.263589432006475	0.819785474878174	0.326055024734754	1.34352810303386
Bahamas	1998	31	0.814554601169708	0.259828609076089	0.812035710532335	0.315853306193494	1.32991600237696
Bahamas	1999	31	1.04546005317468	0.29334329252454	1.041144289732	0.485764756848224	1.63659819120158
Bahamas	2000	31	1.11364969902632	0.267339541335881	1.09887099182382	0.620719105546132	1.65991614559966
Bahamas	2001	31	1.05253127752595	0.293315732468111	1.0425814864492	0.497315046778197	1.63920381225707
Bahamas	2002	31	1.06177199592473	0.296397577826155	1.05496088357028	0.512202367034148	1.6659991109652
Bahamas	2003	31	1.05613782231845	0.287124692394292	1.04749763658206	0.531052296941453	1.64229578055726
Bahamas	2004	31	1.05409279318157	0.299222594127983	1.04797193670785	0.47892767968851	1.67310552365009
Bahamas	2005	31	1.05838572736089	0.294868287448814	1.05196964894515	0.510965055292827	1.66485325973533
Bahamas	2006	31	1.05093651734141	0.292102949015658	1.0443718680413	0.497147362665593	1.64790879181574
Bahamas	2007	31	1.17967780050131	0.30730843506717	1.1742577745868	0.581334730618233	1.80656963244948
Bahamas	2008	31	1.18055281467398	0.299740897922388	1.17586392716739	0.606146279950108	1.79605247177534
Bahamas	2009	31	1.17122928552411	0.304748909941246	1.16517077217851	0.599690547518746	1.79603335377294
Bahamas	2010	31	1.18541414310817	0.307435308059241	1.18190911855666	0.612019093975065	1.80911033068562
Cuba	1946	40	0.344725006473814	0.194499031536513	0.340331591062449	-0.0325677825891952	0.74127374737741
Cuba	1947	40	0.342017491044289	0.200853538434736	0.336306044790646	-0.0415207491902146	0.754290415632439
Cuba	1948	40	0.42574083000682	0.186858779283848	0.420153543737142	0.0816035063089453	0.809644825791745
Cuba	1949	40	0.516393743214262	0.196563487106523	0.511386477335755	0.140830035455223	0.925178608531486
Cuba	1950	40	0.52631864973354	0.178002556563267	0.522124158231207	0.184816079278593	0.889100740425516
Cuba	1951	40	0.516553652777392	0.195174722308833	0.51159504463679	0.155001600742566	0.909785603690813
Cuba	1952	40	-0.695543589536931	0.234316772955888	-0.685565549208287	-1.17647878783456	-0.250711933518894
Cuba	1953	40	-0.813131334100362	0.243460152253876	-0.809724157000383	-1.31079045440784	-0.358679208852045
Cuba	1954	40	-0.945433495914946	0.259057904010158	-0.943247262769965	-1.46630482667505	-0.454383204292831
Cuba	1955	40	-0.901617962662001	0.206115247156952	-0.896536181534486	-1.3087438868429	-0.507148376055135
Cuba	1956	40	-1.13730700120832	0.263159607407433	-1.1376227660004	-1.65523296090291	-0.621411862782255
Cuba	1957	40	-1.00009372239295	0.260253765134698	-0.997844210416907	-1.51650900167268	-0.499616312715235
Cuba	1958	40	-1.14226045149854	0.269062821588631	-1.14333318406929	-1.6703996558605	-0.613796293256007
Cuba	1959	40	-0.696926173627242	0.234831013987717	-0.686354230261017	-1.18337181345907	-0.273163662685576
Cuba	1960	40	-0.992528320641701	0.21142869092361	-0.99399529676115	-1.40130239615526	-0.582692740146545
Cuba	1961	40	-1.13414490141867	0.284546783156757	-1.13047390443899	-1.6955238001395	-0.588316156517052
Cuba	1962	40	-1.13769856634574	0.274748741881078	-1.13282583893146	-1.67996650608065	-0.602682974604867
Cuba	1963	40	-1.13154319329704	0.27341740898342	-1.12610744184639	-1.68607860952007	-0.595876319740461
Cuba	1964	40	-1.13730506700455	0.274813612592777	-1.13272249582067	-1.66740219080984	-0.612129219340935
Cuba	1965	40	-1.39322823180997	0.239759783518139	-1.38299933856925	-1.88576720297016	-0.954902392633331
Cuba	1966	40	-1.12596126713006	0.280070177400945	-1.12430065144542	-1.68561971606585	-0.592626250419381
Cuba	1967	40	-1.13765497071929	0.277980031935895	-1.13084182582837	-1.6856931770467	-0.61041432530094
Cuba	1968	40	-1.13423400210805	0.275663025127935	-1.13036956429627	-1.68539014082879	-0.609584396862036
Cuba	1969	40	-1.13225742965546	0.281866255980135	-1.12767894175157	-1.69482946591686	-0.604218010914504
Cuba	1970	40	-1.1374345085464	0.280443017056821	-1.13554612638572	-1.68578533889804	-0.591341804905314
Cuba	1971	40	-1.13119457007763	0.280347641796017	-1.12542613265784	-1.6986321556173	-0.61017326136828
Cuba	1972	40	-1.19465258338921	0.229759358301106	-1.1929049669053	-1.64962092700513	-0.755073930142513
Cuba	1973	40	-1.1902468287797	0.228648823357616	-1.18831173667331	-1.65299695387296	-0.758153242373845
Cuba	1974	40	-1.19101972251807	0.230333418613729	-1.18826680594268	-1.65166352903768	-0.758109171863056
Cuba	1975	40	-1.18722213625934	0.229981110419295	-1.18485720477148	-1.64832049857785	-0.739878884284851
Cuba	1976	40	-0.958200738589585	0.212427500983901	-0.958981157791751	-1.37686014212175	-0.546075334329954
Cuba	1977	40	-0.874630518621659	0.212532539112747	-0.86946742686216	-1.29171026624028	-0.46659745557352
Cuba	1978	40	-0.875399003814506	0.210890060314958	-0.868802099752876	-1.29826077171397	-0.481419832536691
Cuba	1979	40	-0.873310137858596	0.210751296541709	-0.868356216082509	-1.30032278817998	-0.476476753887156
Cuba	1980	40	-0.984353764689633	0.190592134018083	-0.981408828110254	-1.36238933670768	-0.613470227292338
Cuba	1981	40	-0.873756349821065	0.209679653517895	-0.873091675993226	-1.29408840457894	-0.477834563989733
Cuba	1982	40	-0.871029483557947	0.210564122303108	-0.871340619051676	-1.28226565998032	-0.467465546478287
Cuba	1983	40	-0.903806911464375	0.233921418587555	-0.899026356763045	-1.38610679434211	-0.455626747540755
Cuba	1984	40	-0.906527225851684	0.230461602737996	-0.901672839030198	-1.37182980672889	-0.468344348465266
Cuba	1985	40	-1.1415628018763	0.20117983381102	-1.13748007235087	-1.53998938979183	-0.750512937594381
Cuba	1986	40	-0.906843908634273	0.232349090900194	-0.904203077146826	-1.37196029902028	-0.460824337970373
Cuba	1987	40	-0.903486619731984	0.235339341739507	-0.897612399659952	-1.3740094773407	-0.461083751253249
Cuba	1988	40	-1.23035243282102	0.188041163657458	-1.22872589320116	-1.60505294387906	-0.866796343966731
Cuba	1989	40	-1.18520461478823	0.256676239932573	-1.17869695806714	-1.70311214925223	-0.681557375511803
Cuba	1990	40	-1.18871919725389	0.25631334978226	-1.18441245771694	-1.70477183815489	-0.698269427966422
Cuba	1991	40	-1.18575274686191	0.261525650893599	-1.18073961686673	-1.72775422166744	-0.688192151453057
Cuba	1992	40	-1.19107050175101	0.257804497793404	-1.18550811893408	-1.70830962191994	-0.693463219885316
Cuba	1993	40	-1.18160314808565	0.254226949617093	-1.17708963259164	-1.70127589932705	-0.703092122083327
Cuba	1994	40	-1.18664356311195	0.261192139719865	-1.18320754013028	-1.70085687595879	-0.689966299983938
Cuba	1995	40	-1.18266344106064	0.25575777511476	-1.17581898964161	-1.70473261639072	-0.691042339376384
Cuba	1996	40	-1.18668775296208	0.258715363504888	-1.18213598407007	-1.71249739168167	-0.691450110588512
Cuba	1997	40	-1.17535339106902	0.25891511707054	-1.17065694959512	-1.686120538803	-0.686557517613609
Cuba	1998	40	-1.18710701394612	0.260909637742006	-1.18490855262248	-1.71778523602689	-0.681333187990305
Cuba	1999	40	-1.1764794950735	0.262567722446404	-1.16640776679377	-1.71537406109691	-0.67132162839588
Cuba	2000	40	-1.35750207539942	0.22473119154392	-1.35390955117083	-1.81282692094992	-0.93246069588919
Cuba	2001	40	-1.17693590915287	0.260831171630895	-1.16967116798666	-1.72413480570121	-0.69875733931697
Cuba	2002	40	-1.17979473123114	0.257474354851137	-1.17903813415405	-1.68166897836383	-0.688531108837164
Cuba	2003	40	-1.1773565602965	0.258891668627232	-1.17413965615172	-1.70887930494966	-0.691821154155821
Cuba	2004	40	-1.17682876517244	0.256522922572455	-1.17123712087397	-1.69402752221597	-0.6849318752296
Cuba	2005	40	-1.18154232934398	0.264720576575227	-1.17858034521761	-1.71686222010327	-0.67856417636522
Cuba	2006	40	-0.853603483685108	0.187789361751516	-0.85151026890777	-1.22497554912109	-0.483990184924073
Cuba	2007	40	-1.17946367467229	0.260277251928295	-1.17612196707658	-1.69751086512021	-0.68556746076559
Cuba	2008	40	-0.774131862399046	0.18395877713737	-0.774540230050377	-1.14817513716978	-0.422265957125704
Cuba	2009	40	-1.00482156513041	0.242251179873515	-1.00234535352263	-1.48297888673717	-0.531114326288999
Cuba	2010	40	-0.775089765594754	0.18457940060327	-0.775741466125301	-1.14508837301392	-0.410566021153512
Cuba	2011	40	-0.760288924840964	0.189109063257018	-0.761996707776794	-1.13107818421129	-0.379632418719692
Cuba	2012	40	-0.758792327595149	0.188692546436266	-0.761290862209351	-1.12760503048475	-0.392091641504277
Haiti	1946	41	-0.489743907019011	0.235389014383686	-0.47965222993527	-0.979096136860813	-0.0649020314832844
Haiti	1947	41	-0.532087934575868	0.242617985713736	-0.516244054970326	-1.01749986456873	-0.0876504660975756
Haiti	1948	41	-0.587264306293452	0.230652095751675	-0.581530974352989	-1.06584654380256	-0.165577592061274
Haiti	1949	41	-0.625243411230809	0.223535784456117	-0.616479998440885	-1.0695584470458	-0.214138048175427
Haiti	1950	41	-0.61677020347507	0.193993738572861	-0.611125355045601	-1.00684979427586	-0.247425431049914
Haiti	1951	41	-0.561697915945412	0.222369298973615	-0.553843499505429	-1.01656304965279	-0.144072298825534
Haiti	1952	41	-0.562077091287254	0.227003525089571	-0.551090577807261	-1.01525721352517	-0.13510744266856
Haiti	1953	41	-0.561949673583327	0.223055848726813	-0.552522279030511	-1.01607582197013	-0.146567491361841
Haiti	1954	41	-0.560872156400145	0.218717452559951	-0.550381991298713	-1.01498489600152	-0.174120554191148
Haiti	1955	41	-0.549323928126948	0.186626275577837	-0.546806686289794	-0.919647312009996	-0.196307158865978
Haiti	1956	41	-0.766222210982858	0.239000919309524	-0.75851550142301	-1.24972386673495	-0.31889765347444
Haiti	1957	41	-0.493994677889484	0.203828273892762	-0.489743366597419	-0.906042550363542	-0.108215180231274
Haiti	1958	41	-0.760480024664221	0.224733206516939	-0.753574653705842	-1.230028668901	-0.339025835399664
Haiti	1959	41	-0.75878140391728	0.220994497340127	-0.751369823671324	-1.19321247684755	-0.333714072146473
Haiti	1960	41	-0.751725238723882	0.186364787077022	-0.748639553894344	-1.12116833768332	-0.39600183098252
Haiti	1961	41	-1.13298149995049	0.265687252808525	-1.13175531997821	-1.66621018667775	-0.625782910004014
Haiti	1962	41	-1.13669727127172	0.270288959599133	-1.13074803518528	-1.68500389508662	-0.620164708218768
Haiti	1963	41	-1.27776424077129	0.268204378220621	-1.27672783484194	-1.80964461881435	-0.752557118978855
Haiti	1964	41	-1.2711296656549	0.268055559146791	-1.26610252262036	-1.79052970414818	-0.758062220708661
Haiti	1965	41	-1.07920141593344	0.215662625236136	-1.07301357336816	-1.50387150002824	-0.665759665007122
Haiti	1966	41	-1.13808669527664	0.268731833131354	-1.13928553210536	-1.65638862989899	-0.620942503950079
Haiti	1967	41	-1.27463613701437	0.267008950697817	-1.2778797718331	-1.8026182321491	-0.761383587112131
Haiti	1968	41	-1.1397516978618	0.268073534802798	-1.14078559822217	-1.6573230722351	-0.610462272530461
Haiti	1969	41	-1.13967588234121	0.264075165223006	-1.13987651741745	-1.66049404598634	-0.642945978441111
Haiti	1970	41	-1.13666286555628	0.269692978988796	-1.13741777566777	-1.66524457908154	-0.623748316626107
Haiti	1971	41	-1.41484955341576	0.295240600599282	-1.40844295148482	-2.01992275238796	-0.866104154521367
Haiti	1972	41	-1.32227090942032	0.229213070531558	-1.31977380133056	-1.77918639918553	-0.877513479147995
Haiti	1973	41	-1.22138316794362	0.224163346760426	-1.22019282778147	-1.66388151144477	-0.780973076869204
Haiti	1974	41	-1.21784668655459	0.223959534937525	-1.21590966430423	-1.65577759854501	-0.793306454528566
Haiti	1975	41	-1.22506451183307	0.22739606839171	-1.22721288518326	-1.68786568192769	-0.792986864209441
Haiti	1976	41	-1.22286328628364	0.221255699492687	-1.22003926466787	-1.65416337381394	-0.795571569003668
Haiti	1977	41	-1.15326999452004	0.217830531963713	-1.1526860710022	-1.5953718160003	-0.737772758931178
Haiti	1978	41	-1.15282363616791	0.217843468436188	-1.14596210621011	-1.587208869227	-0.727866151173662
Haiti	1979	41	-1.14830162311628	0.216864573978891	-1.14702964106828	-1.58150705582011	-0.726820345637451
Haiti	1980	41	-1.1960406310865	0.189048266186457	-1.1936790697863	-1.56891269911954	-0.824467805805045
Haiti	1981	41	-1.15444830040806	0.219773244713966	-1.15172798968191	-1.5866837325946	-0.71953545442039
Haiti	1982	41	-1.15179518192094	0.215917064610977	-1.15165249814893	-1.57789003616146	-0.724877752351877
Haiti	1983	41	-1.24786291455743	0.235283843880572	-1.24597359564515	-1.71732900203732	-0.79208422727567
Haiti	1984	41	-1.24579117943732	0.236842525751185	-1.24136748038825	-1.70321513767663	-0.789760868378154
Haiti	1985	41	-1.08670381031848	0.18937570057051	-1.08386678199384	-1.45514836159761	-0.71474012171662
Haiti	1986	41	-0.757210921938571	0.216704957698423	-0.748347073815502	-1.20013231136053	-0.346744012347562
Haiti	1987	41	-0.93566088592086	0.225677843191609	-0.931210076328204	-1.38180770010585	-0.499928592117163
Haiti	1988	41	-0.80710715621145	0.164803312611167	-0.805280071091181	-1.12785173010584	-0.487445557398148
Haiti	1989	41	-0.784048417747217	0.217729562619226	-0.78132419631361	-1.21361141169952	-0.375104824789901
Haiti	1990	41	-0.0690801227826004	0.160219331123519	-0.0650345854850528	-0.388717196334985	0.237152495000266
Haiti	1991	41	-0.676341375209165	0.187651579705078	-0.676128921423688	-1.04971223700421	-0.314550201814688
Haiti	1992	41	-1.18327432930345	0.259052476563508	-1.17952879401874	-1.70913496219715	-0.698955322891187
Haiti	1993	41	-1.18393888692644	0.259589492611532	-1.1851055201788	-1.68568404441163	-0.671481975359933
Haiti	1994	41	-0.171897601727444	0.172683679631664	-0.165526548030155	-0.514122647363125	0.161090812351709
Haiti	1995	41	0.00150381473893011	0.125388764762879	-0.00227710574710719	-0.240321963324866	0.254432371841757
Haiti	1996	41	0.0311127707068191	0.125514998479818	0.0293871802264515	-0.209903428127057	0.283053236449923
Haiti	1997	41	0.0293579908655106	0.126905281955337	0.0255605687186214	-0.210325990548024	0.288428754798135
Haiti	1998	41	0.00816091670429108	0.125521227452384	0.00425681691249033	-0.227907202233462	0.260491068311535
Haiti	1999	41	-0.391440927919847	0.181483602034741	-0.380578559555348	-0.772491227881465	-0.0688775217380051
Haiti	2000	41	-0.436399156324884	0.16436135952801	-0.431412859040286	-0.776499652871245	-0.133592872439869
Haiti	2001	41	-0.635098412067769	0.211986065113495	-0.63061634442074	-1.05200315056623	-0.241554502757775
Haiti	2002	41	-0.637293064446945	0.218272916177509	-0.629355083219768	-1.08167920214128	-0.237390468851115
Haiti	2003	41	-0.626930770611374	0.213935941248815	-0.6213194418012	-1.05551275818233	-0.218279590175203
Haiti	2004	41	-0.659135987025765	0.21391406334113	-0.658092447413606	-1.09483563444585	-0.25149699396318
Haiti	2005	41	-0.588898554452199	0.212842956604646	-0.582012093835568	-1.02553464586703	-0.20516187679178
Haiti	2006	41	0.016993523422952	0.120405302151884	0.0153664936973004	-0.211963822178974	0.251677746932889
Haiti	2007	41	0.0454562354324733	0.1373021904751	0.0429239704742997	-0.219094142311606	0.325201562034136
Haiti	2008	41	-0.051701757616059	0.15725106356753	-0.0534427871880101	-0.353939320477362	0.259460370771717
Haiti	2009	41	0.0401065972820123	0.208256772800536	0.0407600796495952	-0.372534812472333	0.447200878008223
Haiti	2010	41	-0.0957862999199425	0.164261937730587	-0.0973023714816464	-0.412423273498302	0.229043084065401
Haiti	2011	41	-0.144920425202021	0.180607826817086	-0.14230717789115	-0.503826089635499	0.2084630281313
Haiti	2012	41	-0.283844118577528	0.185408508152702	-0.282049204666905	-0.647538555475294	0.0833336192292212
Dominican Rep	1946	42	-1.29243564236331	0.324264021883445	-1.28693721161071	-1.94174696149283	-0.666488533985132
Dominican Rep	1947	42	-1.29583033063999	0.32286723316367	-1.28710964590703	-1.95420737905138	-0.677796320041147
Dominican Rep	1948	42	-1.27689162435682	0.275391132467699	-1.27514858804941	-1.81989146138857	-0.744988909999461
Dominican Rep	1949	42	-1.26953578339362	0.268550732864776	-1.26624964815692	-1.7998686341079	-0.743444582298206
Dominican Rep	1950	42	-1.27316887833881	0.270697244322616	-1.26671981978182	-1.81167809133349	-0.749562538750249
Dominican Rep	1951	42	-1.27494597748826	0.271775700792525	-1.27197335733725	-1.8252417846267	-0.759054082180866
Dominican Rep	1952	42	-1.14116264322822	0.27066104148335	-1.13880016982424	-1.68066233945521	-0.614196572567602
Dominican Rep	1953	42	-1.27270512374632	0.269626212083855	-1.27277814981715	-1.80401239150052	-0.741558681331637
Dominican Rep	1954	42	-1.13720347083142	0.270782441842717	-1.13939816191013	-1.67533772602686	-0.619604965874574
Dominican Rep	1955	42	-1.1628594571905	0.214532931804915	-1.16224599418262	-1.59501498256984	-0.751479740803959
Dominican Rep	1956	42	-1.27501121650517	0.270690973656445	-1.27476169621513	-1.80091996323933	-0.733680813798549
Dominican Rep	1957	42	-1.27364325702073	0.266536915719828	-1.26889359604763	-1.7979651557684	-0.757259176701062
Dominican Rep	1958	42	-1.27859797607963	0.269007748232677	-1.2763174677052	-1.80908711471014	-0.754814408898394
Dominican Rep	1959	42	-1.26912779454488	0.273237260043082	-1.26701179885908	-1.79013920593172	-0.731510807333365
Dominican Rep	1960	42	-1.16656184980328	0.212459926217801	-1.16929831381896	-1.58022447664256	-0.75765478505175
Dominican Rep	1961	42	-0.495842438355056	0.218983217446054	-0.48970230077259	-0.951014343828407	-0.0854569279838974
Dominican Rep	1962	42	-0.175279007007427	0.131510526158367	-0.170851358398775	-0.438977933584851	0.0777611103079543
Dominican Rep	1963	42	-0.295608412221156	0.15178635824978	-0.288927565457219	-0.611689152438062	-0.0191891484821674
Dominican Rep	1964	42	-0.701182732967574	0.231924395911693	-0.688791444969353	-1.18662720106996	-0.277653745724184
Dominican Rep	1965	42	-0.707104153701104	0.196920119513771	-0.699664969025306	-1.11401065532915	-0.337077662871455
Dominican Rep	1966	42	-0.155455040032059	0.130829417348907	-0.153383627287401	-0.424054779945769	0.0894533922529065
Dominican Rep	1967	42	-0.154242026735952	0.128410216924591	-0.151258665427617	-0.418581947925033	0.0857240064104358
Dominican Rep	1968	42	-0.154125384894448	0.129103518877936	-0.148753573120322	-0.417034046693617	0.0824089317459334
Dominican Rep	1969	42	-0.156307573764125	0.129330408972138	-0.151652339159092	-0.419288396375083	0.0889894743209135
Dominican Rep	1970	42	-0.148602160456024	0.127365520674766	-0.14623383959965	-0.408379253440756	0.0905137368296066
Dominican Rep	1971	42	-0.144842132598635	0.126290527687155	-0.14166340856779	-0.401003502741639	0.0907156789170213
Dominican Rep	1972	42	-0.0768330967305772	0.115919586640294	-0.0760879915177225	-0.302137650472524	0.143325672581226
Dominican Rep	1973	42	-0.0745176214138453	0.11598836437992	-0.0731130452978411	-0.306787162638193	0.149463598234993
Dominican Rep	1974	42	-0.183543393434883	0.126926857799791	-0.178243340916708	-0.439653029091326	0.0558498170641991
Dominican Rep	1975	42	-0.179668090525291	0.123432169232163	-0.174052822690653	-0.436823775622409	0.0470441604125044
Dominican Rep	1976	42	-0.204797815892138	0.12596563126961	-0.20138982752242	-0.453646359319639	0.0396916850438828
Dominican Rep	1977	42	-0.231569911738137	0.121894009953967	-0.229236605146366	-0.480791249004208	-0.00648320266595043
Dominican Rep	1978	42	0.432245745570394	0.122660025443343	0.427902192172999	0.207327950769205	0.68408289208566
Dominican Rep	1979	42	0.600789147046271	0.152902617568749	0.592806720014294	0.325548807349046	0.919297596429185
Dominican Rep	1980	42	0.52864269458975	0.133385136561652	0.523300283227098	0.282853637790572	0.801135126426663
Dominican Rep	1981	42	0.705805112473319	0.168166322469909	0.698234152221646	0.401906000132257	1.05082972161525
Dominican Rep	1982	42	0.700603523679138	0.167956681993656	0.693885949383547	0.392602405454617	1.05461511716452
Dominican Rep	1983	42	0.688710204135537	0.174805012310348	0.677965069287552	0.371892684499969	1.05704295320812
Dominican Rep	1984	42	0.629194465792706	0.161156568867213	0.62255228918291	0.3422997176319	0.9616090717049
Dominican Rep	1985	42	0.631235730589848	0.142573062549201	0.624654527994223	0.367950495348184	0.933630716148018
Dominican Rep	1986	42	0.627844728513478	0.162173121582839	0.617505430933282	0.336641489893816	0.968586762593952
Dominican Rep	1987	42	0.627093293223615	0.165624986807958	0.617212165165752	0.330604895510563	0.975572112004294
Dominican Rep	1988	42	0.681906847841025	0.153752113940875	0.675034472762805	0.405065116010591	1.01298049328256
Dominican Rep	1989	42	0.624546112394564	0.162450903904922	0.615223120100354	0.334104078297624	0.967915551645222
Dominican Rep	1990	42	0.515888679717019	0.13533016241521	0.512901804413891	0.26559800730173	0.793599204954894
Dominican Rep	1991	42	0.519483415440642	0.135407395812882	0.514086141021489	0.275128551941671	0.797311823326624
Dominican Rep	1992	42	0.514016912609279	0.131471472276549	0.508113380059639	0.27136518355445	0.786087136143328
Dominican Rep	1993	42	0.496192239960966	0.129907632873351	0.490821325847212	0.254158114719738	0.767937389259407
Dominican Rep	1994	42	0.210598158259977	0.120754117547163	0.209972204302512	-0.0282950327179511	0.445698690964892
Dominican Rep	1995	42	0.210392472376646	0.121590409957581	0.211839004629479	-0.0284632323137118	0.446365645951214
Dominican Rep	1996	42	0.648272430579681	0.158690695335072	0.640588410709228	0.365123975413631	0.988126305975377
Dominican Rep	1997	42	0.644281444001278	0.159217400335952	0.63742948849042	0.356278726853926	0.977149393049493
Dominican Rep	1998	42	0.682133803124626	0.167587554212283	0.676527642312565	0.379308812336864	1.03965846876643
Dominican Rep	1999	42	0.668177244903579	0.169992544453492	0.66113521639255	0.365821749342772	1.02475227009974
Dominican Rep	2000	42	0.675619458185081	0.150469603819621	0.669757040132347	0.396346945121428	0.987152027046791
Dominican Rep	2001	42	0.721804649742125	0.180499543672331	0.715455364594493	0.385600981726498	1.10599047695683
Dominican Rep	2002	42	0.720434069762382	0.178566580469303	0.707920696382722	0.397908693984621	1.09373707193635
Dominican Rep	2003	42	0.666059338047367	0.169722918744801	0.657124137846961	0.36091545228685	1.01898716898795
Dominican Rep	2004	42	0.720001423879616	0.174169336896366	0.715348268974754	0.404047831295998	1.08081666113065
Dominican Rep	2005	42	0.723350780905424	0.177765557125295	0.71893813296144	0.404911363162953	1.09084064356157
Dominican Rep	2006	42	0.653749377817678	0.152290062181194	0.645957976693717	0.372765251270227	0.969270009495438
Dominican Rep	2007	42	0.694839373078486	0.181067366705691	0.688038803122942	0.369152979146874	1.06259009608472
Dominican Rep	2008	42	0.62336860053999	0.164713430202089	0.620538520214979	0.309419028922953	0.948586637102206
Dominican Rep	2009	42	0.630430942848998	0.209825245190568	0.629372240196222	0.224167748873487	1.04344536952371
Dominican Rep	2010	42	0.609282598256199	0.17058904120937	0.609700492213521	0.278478081624042	0.947721350655719
Dominican Rep	2011	42	0.622797729372437	0.18631356546583	0.620790522929808	0.26551261081611	0.990634973829132
Dominican Rep	2012	42	0.623087085186757	0.185914359660312	0.622313194287595	0.260263359177309	0.997881526906017
Jamaica	1960	51	1.45294121280081	0.509699265075008	1.38181412794247	0.647841269948627	2.63665946874457
Jamaica	1962	51	0.967444465935318	0.27753627457747	0.956027158655659	0.461643952794036	1.55937080404009
Jamaica	1963	51	0.973943519211713	0.278881989529982	0.962365041282925	0.466942830525132	1.55039277285654
Jamaica	1964	51	0.969760048917387	0.282574501899794	0.959027824426491	0.452218147535082	1.54865843916384
Jamaica	1965	51	1.03230075199522	0.27170812709244	1.0163066906607	0.547037041356094	1.61197167334438
Jamaica	1966	51	0.974235096559725	0.28666416272397	0.955273626715549	0.45831607872762	1.58395036455499
Jamaica	1967	51	1.05012984002548	0.254384606488272	1.03465214278677	0.594357730542136	1.58719629914869
Jamaica	1968	51	1.06013713322716	0.255206371268005	1.0534134833989	0.574814085948648	1.57285719439829
Jamaica	1969	51	1.05577938280774	0.257740362696601	1.05111449327732	0.580702535552061	1.57903008654075
Jamaica	1970	51	1.04826343833649	0.257763811144688	1.03476825370402	0.583417892934019	1.56544822469609
Jamaica	1971	51	1.04872894613551	0.258418408075933	1.03784228964636	0.569641331066743	1.57529091667418
Jamaica	1972	51	0.912442199438854	0.205702467420993	0.905650758274396	0.521374516544063	1.32716860603077
Jamaica	1973	51	0.918951710404474	0.20515046141881	0.913836606740601	0.53078805091812	1.3291776313911
Jamaica	1974	51	0.916199475300227	0.208925721884445	0.910461402673891	0.520985391833101	1.34496441027119
Jamaica	1975	51	0.910932729092197	0.204176418766906	0.905383183515548	0.524084263485888	1.32739230429773
Jamaica	1976	51	0.888781477451687	0.203277060245122	0.883864243331864	0.501010320940358	1.29235173430703
Jamaica	1977	51	0.813699937677353	0.196329865213448	0.808566824089391	0.436494271026515	1.22202946076738
Jamaica	1978	51	0.817911604898013	0.198745766319789	0.810849860283949	0.446806840482979	1.22165166035473
Jamaica	1979	51	0.812607666939429	0.19813322280344	0.807062552970668	0.434986744388861	1.20865696550491
Jamaica	1980	51	0.862659890995187	0.187981820470146	0.858975106828561	0.50555743131457	1.24597564865107
Jamaica	1981	51	0.822099181719763	0.19724902691047	0.815904786235037	0.450183958959982	1.21689172725391
Jamaica	1982	51	0.818964409158157	0.197512547051242	0.814036809855946	0.442578501319878	1.22026850459309
Jamaica	1983	51	0.603174058847118	0.19513572067789	0.598942881218852	0.23224869781636	0.989234962417191
Jamaica	1984	51	0.608681602806404	0.192434094940582	0.604736858733004	0.245287112715556	1.0034606160372
Jamaica	1985	51	0.520458406718912	0.15953500080853	0.520077432055679	0.211300393606074	0.832745930155884
Jamaica	1986	51	0.608494502994114	0.192298374291897	0.602977461639736	0.246142635276352	1.00026025001159
Jamaica	1987	51	0.683515241944143	0.197731368392462	0.676027535317703	0.311398331448609	1.08450371449436
Jamaica	1988	51	0.751617967023362	0.176994387697851	0.745808709089589	0.425743968706337	1.11766606147155
Jamaica	1989	51	0.888340405163837	0.217036172735025	0.883360832849734	0.482750416212792	1.32924646657214
Jamaica	1990	51	0.890435359493018	0.212363463907362	0.883848524616422	0.490078314046948	1.32717250567531
Jamaica	1991	51	0.891616634881038	0.217736071434813	0.884680079407884	0.48148862009998	1.33032511717895
Jamaica	1992	51	0.894210316412131	0.216551642074206	0.890783580516146	0.472799383537721	1.31626472643131
Jamaica	1993	51	0.633312720386268	0.189284595527502	0.629395520609654	0.268087232404529	1.01952794325545
Jamaica	1994	51	0.636999789391662	0.188416948428773	0.630354326601896	0.28026612485929	1.01963963017654
Jamaica	1995	51	0.637716143696076	0.188260049560427	0.634495126559355	0.280493635229053	1.01127157889501
Jamaica	1996	51	0.638435195582616	0.192067125687375	0.633044157055683	0.278111065878504	1.03285238974221
Jamaica	1997	51	0.633363485780389	0.189373852625978	0.630148936466894	0.265341889743598	1.0124780795773
Jamaica	1998	51	0.697589543186289	0.194212023682839	0.694823645582708	0.322760768348424	1.09165403192145
Jamaica	1999	51	0.669234626969981	0.200707534091592	0.665588250654067	0.275886626514681	1.06992681680779
Jamaica	2000	51	0.635953115813836	0.170027158532466	0.631704554567702	0.321181747234531	0.980138552156508
Jamaica	2001	51	0.596906865996258	0.19790525055243	0.596177603351162	0.213019607232127	0.978822662674684
Jamaica	2002	51	0.595712058889888	0.201092018105961	0.591945352194899	0.205942241300546	1.00349370654854
Jamaica	2003	51	0.597000679834376	0.199500089959123	0.59632987539966	0.213847345536303	0.990993928885481
Jamaica	2004	51	0.598970112286743	0.201290726819693	0.597476798205753	0.199222402883751	0.990422762532303
Jamaica	2005	51	0.591651205686286	0.200626951601301	0.590946807420172	0.200170425754651	0.981105165356463
Jamaica	2006	51	0.744366149660798	0.170335014631296	0.741597631680107	0.412510647474027	1.08631556122278
Jamaica	2007	51	0.593494132330055	0.202842182849314	0.59225796619505	0.201425016012614	0.987343347262568
Jamaica	2008	51	0.744431629259897	0.170641392035698	0.746358852513193	0.412804238792701	1.08851788940946
Jamaica	2009	51	0.571236375625774	0.212383983317249	0.57134822557503	0.159290664899006	0.980629798516336
Jamaica	2010	51	0.741248040839907	0.17266376900318	0.743912590497577	0.401643938459571	1.0717360585991
Jamaica	2011	51	0.81903425640002	0.189408345318273	0.822285371446486	0.438412190935037	1.19149409910066
Jamaica	2012	51	0.815940618860518	0.187265700432899	0.81283789686739	0.450949020375996	1.18338518854707
Trinidad	1962	52	0.658694959591888	0.224221025550582	0.652910137454159	0.232106298340448	1.11841181014802
Trinidad	1963	52	0.656790701919042	0.227092591584673	0.650691516172484	0.231860510469879	1.12434257689205
Trinidad	1964	52	0.655274583980424	0.223033960188357	0.647204755912435	0.239892805676284	1.11565686970326
Trinidad	1965	52	0.598039165571492	0.191675182749105	0.592108455936376	0.235364213103286	0.997754192789395
Trinidad	1966	52	0.584059509214094	0.215923974682073	0.576655723036175	0.182421256299913	1.03622321238668
Trinidad	1967	52	0.759844025993858	0.214753433239033	0.755673892654656	0.342339849436492	1.20152026564649
Trinidad	1968	52	0.766293513038521	0.210668791505775	0.760318473630707	0.374105955127853	1.1987761083393
Trinidad	1969	52	0.768076158478187	0.209712892575368	0.761174778848388	0.374975818361206	1.19767031832338
Trinidad	1970	52	0.760238635749838	0.213994767333323	0.752333969790597	0.365723409355388	1.19523945874376
Trinidad	1971	52	0.394188623644841	0.18812703901051	0.388589414373716	0.0337377977302834	0.785352030895617
Trinidad	1972	52	0.422804868399664	0.168913797134513	0.421497024930692	0.101154475820739	0.760990071900785
Trinidad	1973	52	0.474409254532465	0.170641242942981	0.469190850564332	0.143568465100523	0.814755631855063
Trinidad	1974	52	0.473007523323732	0.171508271646643	0.468177730096772	0.147678702609697	0.820505555225258
Trinidad	1975	52	0.473253687400862	0.170406382646096	0.470911773556274	0.141135757804683	0.820092689341284
Trinidad	1976	52	0.765957190158865	0.182244552750108	0.763625155094438	0.413629398376433	1.1278713695496
Trinidad	1977	52	0.76681452506168	0.186511646936232	0.763828606163205	0.412249712122523	1.14599951300663
Trinidad	1978	52	0.758577486104756	0.185357560504988	0.757038371414402	0.412480824999005	1.12922875987986
Trinidad	1979	52	0.65206532438586	0.179808337710705	0.647991106399402	0.305068271827454	1.01091742591258
Trinidad	1980	52	0.613017673514009	0.159684419704411	0.606816718214583	0.311409483102988	0.933034167761958
Trinidad	1981	52	0.776653004057316	0.190315718884001	0.773914011948082	0.408980615705289	1.15741583561766
Trinidad	1982	52	0.785326700377158	0.186311152021762	0.784052037359872	0.43053200269202	1.16858970273128
Trinidad	1983	52	0.76647074656436	0.195743596447446	0.764410835926267	0.387063546567549	1.15414994096249
Trinidad	1984	52	0.842129497981292	0.197174909755091	0.836042186985214	0.462978740750307	1.23232792795229
Trinidad	1985	52	0.909944049997411	0.182850200564314	0.905398757547889	0.569160653681539	1.27616610986972
Trinidad	1986	52	0.849423551660558	0.201700616416308	0.844890172210752	0.469924338183454	1.25346755179716
Trinidad	1987	52	0.972072360345508	0.216221665070716	0.964773645018712	0.561012167982336	1.40618779712236
Trinidad	1988	52	0.992125989899819	0.200984109596815	0.985080976070966	0.61718237093131	1.40266514833047
Trinidad	1989	52	0.969334105752878	0.213732897008676	0.964426418047673	0.562804256417509	1.40099138727286
Trinidad	1990	52	0.974218825471683	0.211459215596373	0.974431102131204	0.552264266447559	1.3943327031508
Trinidad	1991	52	1.03553438314642	0.213807769176054	1.03551837742493	0.626042258229542	1.44989222270735
Trinidad	1992	52	1.04139938409025	0.21755969245562	1.03791585473827	0.619647835692541	1.4714357452415
Trinidad	1993	52	1.03879804994554	0.218483105546055	1.03183009615064	0.617169201123378	1.47055248869703
Trinidad	1994	52	0.90299206721729	0.209514588267687	0.898020192372896	0.501710997551326	1.32795252050646
Trinidad	1995	52	0.908704202944313	0.204552898653248	0.91030680103394	0.504064529390028	1.3118362104167
Trinidad	1996	52	0.909861026079742	0.204674743058368	0.907688163090048	0.515530532828932	1.31916720406954
Trinidad	1997	52	1.0685174981639	0.229058331253061	1.05708506781897	0.640660287148456	1.5282976784011
Trinidad	1998	52	1.07188288493021	0.227661570288239	1.06556296477649	0.643328846660721	1.54748990369542
Trinidad	1999	52	1.06578904436439	0.232641138792834	1.06160914418754	0.628516939585873	1.53408472359171
Trinidad	2000	52	0.945851212735567	0.203994503575993	0.941537425285905	0.559519125878051	1.35619810313697
Trinidad	2001	52	0.788958592319621	0.219165665254429	0.789976875967075	0.374214320300592	1.22315760151785
Trinidad	2002	52	0.782630657150031	0.218691865104453	0.774775169681126	0.356717103242462	1.22003399381309
Trinidad	2003	52	0.782837287473024	0.214767363735066	0.776644647203138	0.362786912487665	1.20447683379279
Trinidad	2004	52	0.782382477037377	0.219407106041025	0.777875653315001	0.363734132381465	1.23066216376757
Trinidad	2005	52	0.85469149179949	0.224453057497925	0.856364008338441	0.422235377095206	1.29302385605174
Trinidad	2006	52	0.990650761474102	0.181675410423055	0.987256608186529	0.649155737517005	1.35353444486821
Trinidad	2007	52	1.12330421196473	0.242905969498443	1.12350485536467	0.65175451351976	1.60602413992121
Trinidad	2008	52	1.09947252124524	0.186781540332218	1.09888140449785	0.733120026779598	1.46924821864871
Trinidad	2009	52	1.1145756589786	0.237689862465416	1.11214674488685	0.667052212715056	1.58478819406231
Trinidad	2010	52	1.09595849857362	0.191535792543564	1.09536908484657	0.729664609331542	1.47850785197651
Trinidad	2011	52	1.0065022272289	0.20070308173543	1.00192113349396	0.62350327865589	1.40950769700161
Trinidad	2012	52	0.787880467641652	0.195858383218392	0.786864858667941	0.406219358246427	1.16384634757725
Barbados	1966	53	0.608376001913585	0.350184186178372	0.600856003133055	-0.0419011305708749	1.34034993219632
Barbados	1967	53	0.988072528880945	0.321854267880261	0.980182784690854	0.384747765126443	1.64953321701765
Barbados	1968	53	0.995776465819323	0.318569573139641	0.98616055614378	0.403877778317254	1.63739399343889
Barbados	1969	53	0.995686792368182	0.319389707647353	0.991758137785245	0.386448455579171	1.64655825010725
Barbados	1970	53	1.00156072260161	0.321502429112411	0.995516970439628	0.395020263057919	1.65413417832464
Barbados	1971	53	0.682317102824346	0.301512755179983	0.673412377202826	0.107316264262132	1.28779121067453
Barbados	1972	53	1.01780557231897	0.259561821816875	1.01595670225121	0.519030651085752	1.53514374486565
Barbados	1973	53	1.01160203990408	0.256871819503699	1.01179374522258	0.514711360044595	1.52110454477746
Barbados	1974	53	1.02387353081382	0.260726919453232	1.0190308082326	0.519240838883551	1.52686317921535
Barbados	1975	53	1.01916338678502	0.257435709822917	1.01624283194772	0.521073896228751	1.53039425096881
Barbados	1976	53	1.12013211544536	0.260126340321432	1.11778696347131	0.614143420462873	1.63720712110705
Barbados	1977	53	1.12181118189025	0.261470320843007	1.11801655206892	0.618697518087483	1.64860588615184
Barbados	1978	53	1.11363013485582	0.262294895217695	1.10672031662049	0.628588453144213	1.64514906084648
Barbados	1979	53	1.11605612111262	0.261051982843207	1.11163385100892	0.620722101031783	1.63325478835617
Barbados	1980	53	1.15254020169201	0.2448350448654	1.15283773371438	0.690426812333771	1.64451415018287
Barbados	1981	53	1.46830135270562	0.289187830230854	1.46009636006254	0.928527850804799	2.06008160042319
Barbados	1982	53	1.48024834768698	0.291206693142549	1.47359277650173	0.917998282554837	2.06744326987843
Barbados	1983	53	1.31744295213373	0.315934313876159	1.30549628353581	0.725772487088753	1.95948184848
Barbados	1984	53	1.01958240733415	0.269043627172235	1.01763340948476	0.502547705159661	1.54932931510774
Barbados	1985	53	1.09572853785634	0.242568977894675	1.09149468127293	0.641072798809842	1.57730837235999
Barbados	1986	53	1.1844665944832	0.300150332239414	1.1781803532785	0.61384838570918	1.79244952520757
Barbados	1987	53	1.1775839887137	0.294571638831418	1.17268937256091	0.609378426489528	1.7660249941228
Barbados	1988	53	1.20755941000948	0.290917207121748	1.19229404851048	0.678911011246045	1.81695186156861
Barbados	1989	53	1.18730010165658	0.299588594930203	1.18253110118253	0.62222749103202	1.80616857172656
Barbados	1990	53	1.18344390926479	0.301894139890632	1.17644333196432	0.61238421777488	1.79586728632544
Barbados	1991	53	1.17959846441182	0.30140808620366	1.1691745534987	0.628260036741386	1.79615951171545
Barbados	1992	53	1.18642989536662	0.299395660005387	1.18473251583212	0.630063013094193	1.7952541724269
Barbados	1993	53	1.18456823223991	0.29813326438308	1.17678365283235	0.613489362441722	1.79222228029332
Barbados	1994	53	1.17892334314957	0.30504970770442	1.17407145324504	0.611889156034557	1.79473346753554
Barbados	1995	53	1.18031502451056	0.307854999208084	1.17363178702637	0.597559147426739	1.80640787212083
Barbados	1996	53	1.17884382678521	0.2997426797292	1.16677909933207	0.615137691110749	1.78338758948734
Barbados	1997	53	1.18122756080623	0.299495328915209	1.17430364092929	0.618844508547768	1.80071387420395
Barbados	1998	53	1.18258654380953	0.301873839349947	1.16887514756462	0.619880569752936	1.79734684481352
Barbados	1999	53	1.0508422045479	0.29144092674207	1.03992878257395	0.502067383545066	1.63657950508529
Barbados	2000	53	1.12652028582335	0.265353549025519	1.12047834796219	0.63381969821488	1.65738046775514
Barbados	2001	53	1.05304648969111	0.290544443193411	1.04564890140911	0.492449867764328	1.65266154768655
Barbados	2002	53	1.0542461392024	0.295550371777096	1.04261517918343	0.511690944151223	1.65954676628296
Barbados	2003	53	1.05290044634248	0.292280881462615	1.04593272762529	0.496654625200599	1.65171444124357
Barbados	2004	53	1.05862210255863	0.290792564099255	1.04869593619302	0.511127303473353	1.63978244719533
Barbados	2005	53	1.04733920300825	0.289145799892604	1.03840084366411	0.513072123872196	1.63226559588492
Barbados	2006	53	1.05439850418836	0.296649978552227	1.04730458631645	0.498021658066194	1.65084997374016
Barbados	2007	53	1.04687823842114	0.284312297600623	1.03668597700889	0.516443527478688	1.62550238834689
Barbados	2008	53	1.18208170959552	0.302766490868489	1.17513265269045	0.607999818068896	1.79403837678098
Barbados	2009	53	1.18292792955318	0.300961627880857	1.17429405256552	0.614529522720787	1.78568403385836
Barbados	2010	53	1.1742725759047	0.302219446297012	1.168075169405	0.61007472844214	1.79840003830373
Dominica	1978	54	0.467766097851686	0.242071079578419	0.460805381961763	0.0151681787311	0.972753165995887
Dominica	1979	54	0.567885266684658	0.247288135406115	0.563604015677377	0.0876396843744036	1.06113886425345
Dominica	1980	54	0.78070748078407	0.232142147149603	0.772670685932511	0.346153063608246	1.26094238261303
Dominica	1981	54	0.673505112144968	0.257174676963125	0.664429888800675	0.191702721266466	1.19633502975492
Dominica	1982	54	0.674177331412802	0.252467415373236	0.667300967409914	0.195380979111492	1.18288430540104
Dominica	1983	54	0.672390738903512	0.255549179839938	0.668023271963742	0.187621636914059	1.18578869931829
Dominica	1984	54	0.672920807603186	0.254415155278444	0.670083982776525	0.189671386788803	1.18670674133602
Dominica	1985	54	0.622573966319583	0.195230858781639	0.619277557154694	0.251192642281948	1.01387969271028
Dominica	1986	54	0.675907633989651	0.256097253093167	0.662277888307524	0.201988578906052	1.192672268896
Dominica	1987	54	0.6760013912958	0.252053790959836	0.671272164636506	0.188911106370385	1.17653358177282
Dominica	1988	54	0.783469057887596	0.216729935875936	0.775739739729589	0.372777459845261	1.21996847978315
Dominica	1989	54	0.818754371261218	0.261763373553846	0.814423450217413	0.335564895371825	1.33314121363379
Dominica	1990	54	0.92393479912663	0.267036223019158	0.920736744261143	0.409043139372226	1.46629857031549
Dominica	1991	54	0.922872903980544	0.266453145673854	0.916583686903221	0.417608881120368	1.45266002486797
Dominica	1992	54	0.927809225295725	0.26882905834302	0.928166603094786	0.410732814839861	1.45556398376989
Dominica	1993	54	0.920604997984517	0.268377656255214	0.920792077429984	0.397944314681617	1.45352548714984
Dominica	1994	54	0.924760165785956	0.270034376523874	0.91905207714634	0.404786865976262	1.45506767268973
Dominica	1995	54	1.18417780735378	0.304580489980761	1.17630504205975	0.621192878370023	1.7994286238208
Dominica	1996	54	1.17735110575839	0.299187739904555	1.17061367664527	0.617997804931138	1.79534962841995
Dominica	1997	54	1.18100560002016	0.30388153854034	1.16956900698306	0.621688147190628	1.80710371810269
Dominica	1998	54	1.18046806725593	0.297384945601986	1.1715354533514	0.61941223340198	1.78288577561926
Dominica	1999	54	1.17582989865164	0.299604312137357	1.15870179492247	0.606664703449649	1.78211893942699
Dominica	2000	54	1.35246375793904	0.294313510223531	1.33357270122436	0.8171301650677	1.97640318004621
Dominica	2001	54	1.32238214907729	0.31578877683447	1.31842303304166	0.720874592331191	1.96896372659519
Dominica	2002	54	1.31726266051407	0.312207321027011	1.30859984128694	0.732729114574107	1.95456661146939
Dominica	2003	54	1.31911072342691	0.308298903580483	1.31580038861155	0.736603488820417	1.95034465817259
Dominica	2004	54	1.319653594341	0.318582164753972	1.31344165799644	0.719718073761394	1.97175714763634
Dominica	2005	54	1.05213061692524	0.290161457824403	1.04304826280552	0.510956100896068	1.63672476512532
Dominica	2006	54	1.05613542958258	0.289812430745176	1.04965073129672	0.492460249486018	1.62774749295824
Dominica	2007	54	1.05614941541313	0.294520980218575	1.04821870452671	0.500438338282548	1.65801320978748
Dominica	2008	54	1.05038601418907	0.293067183984449	1.04563568796489	0.502703567030008	1.63456231143988
Dominica	2009	54	1.03985014560009	0.297740652040432	1.03756747081437	0.464467229994999	1.63472191332724
Dominica	2010	54	1.04616289440472	0.300839166135669	1.04230124786739	0.463393648708128	1.66229642332306
Grenada	1974	55	0.452469679557429	0.216378916756117	0.442714466556863	0.049317786778116	0.890234096931676
Grenada	1975	55	0.458732365208383	0.22501857862653	0.455932203559975	0.0290431895711784	0.912444896729777
Grenada	1976	55	0.54140025880109	0.227576610011467	0.535830982603856	0.103374244623859	1.00359522474318
Grenada	1977	55	0.613385232458061	0.229894812357823	0.610033825535778	0.168589650412038	1.0742667963455
Grenada	1978	55	0.618884410737799	0.231625574005078	0.618660241701692	0.171698085879318	1.07620076031399
Grenada	1979	55	-0.842133727336017	0.267276229553165	-0.834230421548295	-1.38071322298509	-0.33450271118523
Grenada	1980	55	-1.10852807272487	0.225216307991556	-1.10911050286316	-1.55153119515306	-0.680248313076334
Grenada	1981	55	-0.988188432612389	0.276694929945719	-0.986123019769338	-1.53618808675582	-0.443210275925501
Grenada	1982	55	-0.992355733991458	0.278605005387513	-0.993319366800844	-1.55067164028493	-0.451339059218105
Grenada	1983	55	-1.08161686580483	0.324221692239205	-1.08098866584052	-1.72841362127465	-0.458871680321257
Grenada	1984	55	0.309677680339588	0.23157090040442	0.301194829265176	-0.132429660866958	0.781092244127454
Grenada	1985	55	0.735782722822261	0.215853810097169	0.732250912133606	0.322660272437448	1.17553303450812
Grenada	1986	55	0.672054460571184	0.258587796812604	0.667824561127597	0.171240274294317	1.19234528863612
Grenada	1987	55	0.817682306672515	0.258641179276218	0.810119796357264	0.332825232854787	1.33373009318314
Grenada	1988	55	0.891058062997699	0.233497438843191	0.877750246397156	0.467598518336217	1.37757266731615
Grenada	1989	55	0.675559933154961	0.255986062549132	0.671176390629254	0.194646744520877	1.19000230775096
Grenada	1990	55	0.777501305274292	0.256937820287958	0.771185969713018	0.289321890958673	1.2970847362267
Grenada	1991	55	0.923820953084529	0.265926254811972	0.91893672954862	0.414687399354869	1.45897524061428
Grenada	1992	55	0.926910644570454	0.267618531394841	0.921979721931029	0.409803290664844	1.45480725499555
Grenada	1993	55	0.917263424793984	0.267249105828078	0.917399068197968	0.401842718210795	1.45363436738928
Grenada	1994	55	0.921500371801831	0.268520429520252	0.913549358103741	0.416375980484834	1.46083836728472
Grenada	1995	55	0.925285728361867	0.264399586949109	0.924174381232312	0.408675630599731	1.45229518205359
Grenada	1996	55	0.92115210220905	0.265908547938054	0.91712506971582	0.418668218870589	1.44478868304491
Grenada	1997	55	0.917995777282628	0.259717498166057	0.91434392185441	0.417857759634507	1.44254292135116
Grenada	1998	55	0.922900158913963	0.267184332382906	0.929149469270272	0.405978782646156	1.45134235721847
Grenada	1999	55	0.817875563592869	0.262157850691025	0.813387616719077	0.319236624738883	1.33804214875658
Grenada	2000	55	0.934181386851482	0.229898816975009	0.927241204677426	0.49677949680986	1.40670186396933
Grenada	2001	55	0.820529944432989	0.262792664773457	0.813789263548698	0.333248831914371	1.35611202538084
Grenada	2002	55	0.817422723790095	0.258507444495363	0.814741404651689	0.328858771849507	1.33901892091153
Grenada	2003	55	0.92051564941354	0.267198371198651	0.919170798134099	0.40638116002644	1.45363731931655
Grenada	2004	55	0.921258512499005	0.270737012359881	0.919290280447156	0.412981500371033	1.46303372304402
Grenada	2005	55	0.924583437321505	0.266084190114457	0.919722913398856	0.419709767339801	1.45885612963243
Grenada	2006	55	0.926482935525327	0.268951677301941	0.924803082104285	0.416405477219627	1.45120521158147
Grenada	2007	55	0.920675783883049	0.265428627646943	0.913903625447761	0.418937550883923	1.46459453856478
Grenada	2008	55	1.15704621132801	0.272849867154981	1.15105564586176	0.624814682795876	1.68630991108031
Grenada	2009	55	0.799840306688984	0.277669435052504	0.803848185558558	0.249079532289832	1.33794623871635
Grenada	2010	55	0.794961057463501	0.276188896305879	0.79692609672871	0.238070295860691	1.3267196537879
St. Lucia	1979	56	0.564076254213864	0.244335979368118	0.559878521696475	0.102680382133433	1.0524037250875
St. Lucia	1980	56	0.783500582553412	0.232137255308672	0.774361140566419	0.344608227966271	1.25961322838544
St. Lucia	1981	56	0.663050292622389	0.25441371588076	0.660648426042003	0.183854192357647	1.16570430954632
St. Lucia	1982	56	0.671826439435598	0.258069799227747	0.669402018127616	0.184284543400182	1.19740055072537
St. Lucia	1983	56	0.671334066530713	0.2605937293281	0.664256777488602	0.182211988928282	1.20348098972934
St. Lucia	1984	56	0.825212754504733	0.266668817283078	0.818875358255938	0.322096456509356	1.3608925391439
St. Lucia	1985	56	0.926897182107175	0.23387770296675	0.916184818941602	0.487652456628884	1.40681060381349
St. Lucia	1986	56	0.822696295473816	0.263173531802311	0.817183930852134	0.318085356046028	1.35559757100942
St. Lucia	1987	56	0.822883655582451	0.259094750855027	0.821101950575367	0.33632460248808	1.33429229159193
St. Lucia	1988	56	0.890449219595675	0.234831035307494	0.8787761563022	0.46803180168509	1.37349142574325
St. Lucia	1989	56	0.822772698086149	0.262748161774754	0.823683808441637	0.331817746969356	1.34594881199812
St. Lucia	1990	56	0.818911697431291	0.263759664690802	0.819880901394774	0.313461607385906	1.33944034768486
St. Lucia	1991	56	0.818133265840866	0.2644443474438	0.818247012383497	0.30932629851922	1.34034929633685
St. Lucia	1992	56	0.824972196727904	0.26322168080993	0.82171156209466	0.330707888131153	1.36243590174163
St. Lucia	1993	56	0.82219005333144	0.264967397918637	0.81885135782658	0.301041107559897	1.34225964661391
St. Lucia	1994	56	0.824207603543835	0.263366566507435	0.816076844276508	0.317902048855375	1.34235294640151
St. Lucia	1995	56	0.814608331128866	0.262476697206983	0.807068808697791	0.315752823215771	1.33434479748311
St. Lucia	1996	56	0.819391507608065	0.259984671591564	0.816242554968573	0.320637630194147	1.3306565289891
St. Lucia	1997	56	0.822792265045644	0.260822385304759	0.819548709805148	0.30990722190776	1.34590927795519
St. Lucia	1998	56	0.825251914010895	0.262652231014393	0.819026279667388	0.333951850999596	1.35265728369315
St. Lucia	1999	56	0.819525217051424	0.265360097279281	0.816133679477582	0.317934379763897	1.3506007499272
St. Lucia	2000	56	0.935190556754679	0.229376381048555	0.930459190571837	0.502992389178736	1.4107913667399
St. Lucia	2001	56	0.817557984265871	0.261025037124418	0.809328309595739	0.331666324321553	1.35759276743078
St. Lucia	2002	56	0.81911681817879	0.259769077570893	0.815866897192124	0.325975459480419	1.33698226498009
St. Lucia	2003	56	0.817405436016703	0.261469530762053	0.812538697122883	0.306184387511262	1.34135642163297
St. Lucia	2004	56	0.816379733868296	0.258767057168247	0.810836603773983	0.328253779959766	1.3274871761607
St. Lucia	2005	56	1.05063091608432	0.292203437461748	1.0432401740738	0.501292027707218	1.64923445104779
St. Lucia	2006	56	1.05225686489781	0.293901017464375	1.04223282225667	0.494133359198666	1.63421245803243
St. Lucia	2007	56	1.05025793917982	0.291063692534487	1.04532533789493	0.494117265334323	1.6460969029938
St. Lucia	2008	56	1.05041893279024	0.29032813589157	1.04206136120159	0.516612190061239	1.63771747701867
St. Lucia	2009	56	1.18579595123165	0.305463815996383	1.17865557113799	0.600461026635084	1.80256556135773
St. Lucia	2010	56	1.17392999290816	0.302264352680803	1.16055244697875	0.621246347507051	1.78853085598759
St. Vincent & Grenadine	1979	57	0.570771014895175	0.251674280402991	0.569941784199646	0.0855162605752446	1.07468810509493
St. Vincent & Grenadine	1980	57	0.69728512750849	0.224821918090758	0.691501343057526	0.26750738453161	1.15189689495661
St. Vincent & Grenadine	1981	57	0.57740709968219	0.250730501138859	0.572183205322868	0.106448723700493	1.08218948377702
St. Vincent & Grenadine	1982	57	0.567755013973273	0.250793253347275	0.563514416449804	0.0947116208513281	1.07177330345976
St. Vincent & Grenadine	1983	57	0.566119997938807	0.252063747402971	0.562936522936316	0.0940241049799961	1.06118020545373
St. Vincent & Grenadine	1984	57	0.678186266442208	0.251800808194446	0.671671283085032	0.20743500442555	1.19089325273727
St. Vincent & Grenadine	1985	57	0.81652846879548	0.222221240425145	0.809845267130235	0.39852262689184	1.26506421799728
St. Vincent & Grenadine	1986	57	0.669277978958353	0.257406946527981	0.664001697652596	0.174803999223938	1.188792121101
St. Vincent & Grenadine	1987	57	0.819218363486114	0.265299648810113	0.819892996162179	0.305002025558692	1.35807259076243
St. Vincent & Grenadine	1988	57	0.89348946300166	0.235438692260035	0.886863986223744	0.45320100625947	1.38011559504087
St. Vincent & Grenadine	1989	57	0.713252797231501	0.255616925679052	0.714575770925939	0.218471723766252	1.21467344271669
St. Vincent & Grenadine	1990	57	0.711126075115757	0.259335722830054	0.706168484863735	0.205475110632601	1.22085584727767
St. Vincent & Grenadine	1991	57	0.71190391094913	0.262825710610289	0.706355014512825	0.214998752328099	1.24234149630114
St. Vincent & Grenadine	1992	57	0.717154406440436	0.257936111529443	0.708030779548516	0.228142632729235	1.23659753838753
St. Vincent & Grenadine	1993	57	0.922470948647765	0.285041654954009	0.916892098797082	0.383831367731957	1.50410181022751
St. Vincent & Grenadine	1994	57	0.819746139095181	0.260823527966005	0.81644640984169	0.329934301836519	1.35111019856903
St. Vincent & Grenadine	1995	57	0.82064515386005	0.261245827696677	0.813725694469056	0.314212361030153	1.34291433695774
St. Vincent & Grenadine	1996	57	0.821372347064789	0.261927093028884	0.81901886445644	0.312670696404729	1.33569953319722
St. Vincent & Grenadine	1997	57	0.814781639859954	0.2624149548738	0.808023648004881	0.311796319081856	1.34890923497725
St. Vincent & Grenadine	1998	57	0.922198793521523	0.264195273209493	0.918410181052112	0.412461263934337	1.42733472620901
St. Vincent & Grenadine	1999	57	0.924125460805803	0.270314933745784	0.923405881729541	0.396423196931406	1.45911807502615
St. Vincent & Grenadine	2000	57	1.01256244867911	0.237000011665555	1.00651129886525	0.565886536433091	1.4913561445124
St. Vincent & Grenadine	2001	57	0.918249466171145	0.263766436852147	0.916532270402129	0.408644283865931	1.42878258840171
St. Vincent & Grenadine	2002	57	0.925533064179854	0.266887159999149	0.922946789636681	0.416960769952752	1.45499945906469
St. Vincent & Grenadine	2003	57	0.925291349722815	0.268415486042215	0.927809495986149	0.394113722459193	1.44566216264114
St. Vincent & Grenadine	2004	57	0.928656989389388	0.262899311128386	0.923857093741784	0.418142366257117	1.44269641441986
St. Vincent & Grenadine	2005	57	1.03010220250655	0.272382481108953	1.0273011442391	0.502248652313169	1.56299183474103
St. Vincent & Grenadine	2006	57	1.02419483449071	0.268916327976105	1.02831623305569	0.49594585262064	1.54344238984166
St. Vincent & Grenadine	2007	57	1.02677301871529	0.268931698910086	1.0239914011322	0.507260360448983	1.56540364123698
St. Vincent & Grenadine	2008	57	1.02428627702805	0.268411066241003	1.02074483998195	0.506477779536196	1.55832771596752
St. Vincent & Grenadine	2009	57	1.02141197679962	0.280868861501735	1.02237348002089	0.464233088624076	1.55962182587748
St. Vincent & Grenadine	2010	57	1.31835462857597	0.314508365972284	1.30745839481293	0.725358131319229	1.95427562192303
Antigua & Barbuda	1981	58	0.573765167657866	0.248587553315185	0.57121444794103	0.101889437572123	1.06926393582689
Antigua & Barbuda	1982	58	0.577025215902982	0.242355029008501	0.570459456664044	0.11847443527605	1.07824646999934
Antigua & Barbuda	1983	58	0.472982113275589	0.237282032301436	0.469691337492305	0.0240369939011199	0.946767238668509
Antigua & Barbuda	1984	58	0.383881973516245	0.236966724140695	0.378812385990292	-0.0615188286348669	0.860198985378571
Antigua & Barbuda	1985	58	0.348120491852114	0.182583566709556	0.346114679687922	-0.00337353116775713	0.714367506615167
Antigua & Barbuda	1986	58	0.38312511512434	0.238104040109851	0.376325491411542	-0.0645760326561301	0.86434382869943
Antigua & Barbuda	1987	58	0.378097245791964	0.237017651772761	0.370492421526396	-0.0732570336339867	0.862487398773966
Antigua & Barbuda	1988	58	0.586112498787084	0.190303622505844	0.579791528040267	0.23135664442116	0.970719102240908
Antigua & Barbuda	1989	58	0.470889888707767	0.237448699986141	0.466198443390931	0.0170683485059848	0.948343298359899
Antigua & Barbuda	1990	58	0.466978638099051	0.237133344025351	0.464841113844132	0.00173569179407349	0.932949047707962
Antigua & Barbuda	1991	58	0.385651083824266	0.237164442675187	0.382376666767931	-0.0635560439649072	0.869401392521802
Antigua & Barbuda	1992	58	0.381805126805304	0.235058402964805	0.377179768623288	-0.0601333800574041	0.853673457084377
Antigua & Barbuda	1993	58	0.303534349975017	0.234644799762124	0.299774244038114	-0.143066937600401	0.77831184110391
Antigua & Barbuda	1994	58	0.390422131987201	0.234950336997636	0.38683147418095	-0.0545138862886668	0.855841245419459
Antigua & Barbuda	1995	58	0.392628023483244	0.236870032261474	0.383137269069851	-0.063633202834495	0.870990140823856
Antigua & Barbuda	1996	58	0.388651282448006	0.236982224152286	0.38021581233741	-0.0579780169893091	0.869933721043226
Antigua & Barbuda	1997	58	0.388152654792433	0.2380814743186	0.381335666289131	-0.0557366787517482	0.86610622126247
Antigua & Barbuda	1998	58	0.389330339946779	0.236277387431225	0.379822413680692	-0.0549101900147225	0.868796563714987
Antigua & Barbuda	1999	58	0.476708001314692	0.242388337381393	0.473238468618202	0.00898791792070906	0.970314698859304
Antigua & Barbuda	2000	58	0.727452503128581	0.213156071003702	0.724232941671001	0.324062907113187	1.17052460713054
Antigua & Barbuda	2001	58	0.559159291775822	0.248445197915974	0.554305548776228	0.0907778222695256	1.06049401702363
Antigua & Barbuda	2002	58	0.56717526917852	0.247555636228479	0.561731260948977	0.109571483471401	1.07414328152288
Antigua & Barbuda	2003	58	0.559107256036014	0.243385344241864	0.556802767391879	0.0997339724658303	1.04707208139498
Antigua & Barbuda	2004	58	0.873404495266039	0.264661727221607	0.872864614352724	0.364891166999391	1.40543797380319
Antigua & Barbuda	2005	58	0.871176643158274	0.263992745448825	0.873094790240393	0.360028262456661	1.38363116565925
Antigua & Barbuda	2006	58	0.867872251556635	0.261091807719455	0.866175799359196	0.364046048327429	1.38375644253562
Antigua & Barbuda	2007	58	0.873159619827288	0.270977838257225	0.867840352743672	0.355306065613114	1.41159804704339
Antigua & Barbuda	2008	58	0.871160861369529	0.260725869425724	0.865517314653933	0.375526862836311	1.39804169064688
Antigua & Barbuda	2009	58	0.608162733858333	0.268262651000745	0.605356384458615	0.0890087609013667	1.13777636728766
Antigua & Barbuda	2010	58	0.6177462449899	0.269592342565207	0.62181594641067	0.0974786026618095	1.14608844989315
St. Kitts & Nevis	1983	60	0.675943352503867	0.25677597390293	0.673588561337469	0.182426116151488	1.18756915989018
St. Kitts & Nevis	1984	60	1.05082988950189	0.289744084980754	1.04933936510002	0.509061038990009	1.62085320909488
St. Kitts & Nevis	1985	60	1.11896029738911	0.264576547232872	1.10537554013667	0.630699105715724	1.65308109274259
St. Kitts & Nevis	1986	60	1.05046961200277	0.289574860874672	1.04442103539665	0.494249418978539	1.64365476692702
St. Kitts & Nevis	1987	60	0.818540024218867	0.265081499463472	0.813483980938889	0.304039728205144	1.33982851897535
St. Kitts & Nevis	1988	60	0.895615322883386	0.231215951346493	0.884367684074531	0.48115460056627	1.37469299322004
St. Kitts & Nevis	1989	60	1.05786803708866	0.293230461298786	1.05628832228595	0.511050200841133	1.65530357713023
St. Kitts & Nevis	1990	60	1.04922964013953	0.291411707424517	1.0408817427761	0.4832286101552	1.64682603275824
St. Kitts & Nevis	1991	60	1.05020200225721	0.291737823424301	1.04258438882871	0.504950105388338	1.65201382266036
St. Kitts & Nevis	1992	60	1.05135736597948	0.291990594688503	1.04052166978789	0.502021021046599	1.64863978714993
St. Kitts & Nevis	1993	60	1.18460955906485	0.302926906970624	1.17979229302789	0.611324774995699	1.79224980712386
St. Kitts & Nevis	1994	60	0.775290063855825	0.260573406479851	0.768505010325754	0.273822353506054	1.29716990383483
St. Kitts & Nevis	1995	60	0.821675789402549	0.259544487522055	0.819789676557348	0.328174103065569	1.3444589730896
St. Kitts & Nevis	1996	60	0.822611427449001	0.258041735152756	0.817362595113462	0.334260819659299	1.34216086935025
St. Kitts & Nevis	1997	60	0.819287830421839	0.269086145015408	0.814672815774966	0.304090462226376	1.35430451743587
St. Kitts & Nevis	1998	60	0.819876206856875	0.267898307870158	0.814922351272178	0.310688257827159	1.3529632226206
St. Kitts & Nevis	1999	60	0.817016764687163	0.264389763955034	0.811008184742417	0.31235464931196	1.3473440362015
St. Kitts & Nevis	2000	60	1.09086617411533	0.244708056672581	1.08375462105067	0.61943510638307	1.58978535231741
St. Kitts & Nevis	2001	60	1.02403561126454	0.272507585004927	1.02697762376286	0.482464671528851	1.56391299538407
St. Kitts & Nevis	2002	60	1.0258219403939	0.269448872798664	1.02045538344472	0.503656930621619	1.55846788540213
St. Kitts & Nevis	2003	60	1.02665623616251	0.270346325946657	1.02534664838049	0.495920568600137	1.55622366344158
St. Kitts & Nevis	2004	60	0.924436209993809	0.270191401567447	0.924341083474905	0.416799446848122	1.47401510098202
St. Kitts & Nevis	2005	60	1.18960192905545	0.302870702390599	1.17969924990413	0.629947403597135	1.80891868626176
St. Kitts & Nevis	2006	60	1.17485293698089	0.303923359493781	1.16306079255609	0.602435896240617	1.79487762268766
St. Kitts & Nevis	2007	60	1.18901462639492	0.299201003878475	1.18103565028477	0.634627213599432	1.78946558969784
St. Kitts & Nevis	2008	60	1.18393530433847	0.300171700212917	1.17352211501998	0.601027661146833	1.78773788298907
St. Kitts & Nevis	2009	60	1.1818623850831	0.302327118589668	1.17669312090762	0.598215343128442	1.79682342419627
St. Kitts & Nevis	2010	60	1.50380646211327	0.326274774225366	1.49498970208027	0.897636596244704	2.18397952068637
Mexico	1946	70	-0.703392520728818	0.26315793060063	-0.699109829618376	-1.23282359616787	-0.224626202638527
Mexico	1947	70	-0.714105324124003	0.266382436232254	-0.699253427246094	-1.26290489180345	-0.226477269780183
Mexico	1948	70	-0.605588245852306	0.228822258625059	-0.603975159437379	-1.05911386370242	-0.178279746036526
Mexico	1949	70	-0.604955162794969	0.222802441151249	-0.602448872119484	-1.06267589546221	-0.184577069115995
Mexico	1950	70	-0.396240673095542	0.175166622749731	-0.389111625259697	-0.749462912447699	-0.0651717348349974
Mexico	1951	70	-0.607030782258229	0.228464802279933	-0.600686824069494	-1.07040351711975	-0.186778004390336
Mexico	1952	70	-0.607602822796356	0.22456220951169	-0.59336896452677	-1.07700684142218	-0.189426237894516
Mexico	1953	70	-0.60325687104547	0.225321141752153	-0.598149591219449	-1.0682228265186	-0.191914485875929
Mexico	1954	70	-0.604136021286851	0.22395056984912	-0.596312133303519	-1.06810308854273	-0.185965238754026
Mexico	1955	70	-0.608365410418177	0.225225858457957	-0.597108631397384	-1.08076829462303	-0.202179245557769
Mexico	1956	70	-0.607303199168031	0.226146550119073	-0.598734763617089	-1.07279215235575	-0.18410307947614
Mexico	1957	70	-0.606932133405632	0.226252809802692	-0.60073921221115	-1.06848082429931	-0.177222153620539
Mexico	1958	70	-0.605050707149039	0.225718807769788	-0.596205085301811	-1.0710023415317	-0.187893009023432
Mexico	1959	70	-0.605863050891353	0.22563075572791	-0.598325370931033	-1.05972528596777	-0.186261520380338
Mexico	1960	70	-0.301791088168967	0.156153320896889	-0.296760563005372	-0.617039079886046	-0.00610003448642711
Mexico	1961	70	-0.606986228909786	0.224739612137087	-0.599130774709909	-1.07495685496333	-0.187740895702432
Mexico	1962	70	-0.601217151576686	0.225070618509216	-0.595634365500329	-1.05335255820687	-0.181005583422251
Mexico	1963	70	-0.604826420535198	0.225690379830412	-0.596981053749835	-1.06801371044214	-0.184800313054143
Mexico	1964	70	-0.607331083951309	0.226067828599092	-0.597871562326572	-1.07466993008483	-0.194092284034819
Mexico	1965	70	-0.398628075200452	0.175596786833261	-0.394869226827852	-0.747499154217427	-0.0608003409962262
Mexico	1966	70	-0.603092167226987	0.228039410426184	-0.59205114378684	-1.06982736370915	-0.18944000944244
Mexico	1967	70	-0.526576317781926	0.221715108772471	-0.518256198042108	-0.984056045259707	-0.118082476589625
Mexico	1968	70	-0.526885294506615	0.216180818028009	-0.519682178940581	-0.972913921097174	-0.12637279989986
Mexico	1969	70	-0.524681249247447	0.214064541043996	-0.518604650608647	-0.973744389921266	-0.113228295944654
Mexico	1970	70	-0.523898837498716	0.217256002541304	-0.518769795462219	-0.956931314588615	-0.113055110979752
Mexico	1971	70	-0.529850799633912	0.222378481458607	-0.521361174799733	-0.989085031835361	-0.114855026397395
Mexico	1972	70	-0.395644763404923	0.181774518117335	-0.391493598946487	-0.765060502050685	-0.0448006215203588
Mexico	1973	70	-0.349937217868688	0.178105645660237	-0.343655594632003	-0.713986642894084	-0.0173690558597118
Mexico	1974	70	-0.351717735924508	0.179474768387238	-0.34957083754496	-0.709524267719831	-0.0128768365317014
Mexico	1975	70	-0.352465443708504	0.178021013906246	-0.348808069476849	-0.707520119063927	-0.00645224940849098
Mexico	1976	70	-0.398476384900671	0.181607103552018	-0.397576356096398	-0.761860399200216	-0.0601065093452032
Mexico	1977	70	-0.261419455805633	0.15706723402925	-0.259703009446802	-0.576794071117262	0.0442431122915643
Mexico	1978	70	-0.378303385037364	0.17711480850393	-0.373102968326138	-0.739516948116413	-0.0430006522267224
Mexico	1979	70	-0.283983513912999	0.17168393050267	-0.28098222730855	-0.639618984329629	0.0466466251480598
Mexico	1980	70	-0.329603559826744	0.156316828932052	-0.326617656164834	-0.648137308785326	-0.0295772928417684
Mexico	1981	70	-0.334734298490461	0.176126993048382	-0.329596440743501	-0.696312823895461	0.00272106185099495
Mexico	1982	70	-0.153724516137795	0.164215735141873	-0.149129087063273	-0.480190457752385	0.161619208426527
Mexico	1983	70	-0.255327532959595	0.173668885385348	-0.252481538110835	-0.601955802389397	0.0818136617610841
Mexico	1984	70	-0.250855497016093	0.179157603756004	-0.244173741431848	-0.618943651091136	0.0840767168234339
Mexico	1985	70	-0.200626695219432	0.141277191037711	-0.197387553963214	-0.48808129338967	0.0729006136779667
Mexico	1986	70	-0.297443835528294	0.178487721507799	-0.294614537203418	-0.667594496344755	0.0311238423379931
Mexico	1987	70	-0.303552709849795	0.18017033730499	-0.303123521481833	-0.670876763318852	0.0330556364542187
Mexico	1988	70	0.00524833539744497	0.108935071351141	0.00615089497536235	-0.205670024951639	0.221128204080408
Mexico	1989	70	0.0486050748092961	0.126557664450189	0.0477331397364816	-0.191901873264815	0.292448985125672
Mexico	1990	70	-0.0445663024885584	0.117673822722335	-0.0465405134161944	-0.273745224122656	0.187868410624292
Mexico	1991	70	-0.0460259184629896	0.116410903753479	-0.0464215522403508	-0.272941423329198	0.185575406029884
Mexico	1992	70	0.0244778030799938	0.117747135043914	0.0227188302630402	-0.206940859626698	0.253688627580271
Mexico	1993	70	0.00573642333363281	0.116484102622508	0.00273548695184231	-0.221480540293689	0.233310738420559
Mexico	1994	70	0.0554080493560917	0.118357958881164	0.052444465079454	-0.17393882058912	0.290672414511748
Mexico	1995	70	0.14590242743451	0.119332424804527	0.145700905737382	-0.0844707671288131	0.3820189016154
Mexico	1996	70	0.16350807033984	0.121095685217059	0.164525089407523	-0.0754796430438694	0.392439124679132
Mexico	1997	70	0.196015887695897	0.120379063758327	0.197263483590385	-0.0425553533607744	0.426178702884511
Mexico	1998	70	0.261294782212478	0.119374810337277	0.260924818846156	0.0226851854393526	0.488923302145616
Mexico	1999	70	0.210738930771101	0.12609136620416	0.212265678028049	-0.039370188712375	0.452783288835642
Mexico	2000	70	0.669858576116359	0.148754234924755	0.661546496543445	0.395379983416283	0.975770522173872
Mexico	2001	70	0.712147309720495	0.177235033213161	0.705096747845188	0.385834225546082	1.07990716697834
Mexico	2002	70	0.767648586893544	0.182568188803481	0.758564784023339	0.431517633079512	1.14491427058799
Mexico	2003	70	0.771403590130029	0.184797064399573	0.764222294252065	0.425029883856849	1.15272631258317
Mexico	2004	70	0.77169180768689	0.184071956951437	0.764471701437406	0.444806762296781	1.15406861118584
Mexico	2005	70	0.775556672019788	0.182867481469738	0.76853944027403	0.445213085033547	1.15389604849975
Mexico	2006	70	0.646678450636156	0.150944156493194	0.640779198713431	0.374402549530549	0.961123199470945
Mexico	2007	70	0.683828385813242	0.182105346172436	0.67373604024901	0.359910300537811	1.07733856709421
Mexico	2008	70	0.619652674095131	0.170980755390455	0.616753675076729	0.293755494460428	0.960048236879764
Mexico	2009	70	0.621547213393265	0.213209080186084	0.622680309276131	0.192716195558041	1.0425746221142
Mexico	2010	70	0.560430131589078	0.172513805065888	0.558526956171918	0.229579763299203	0.899766670045176
Mexico	2011	70	0.509159858423177	0.185308503608739	0.508255679261285	0.150880461540972	0.8758955255758
Mexico	2012	70	0.505909960416162	0.186619635151233	0.503249986721154	0.143422262340669	0.872939492057979
Belize	1981	80	0.71740778100048	0.255306655863248	0.712499765896641	0.23138509621541	1.22997171585628
Belize	1982	80	0.698552473044337	0.257493652947271	0.690820148130703	0.208426778107357	1.22613238724741
Belize	1983	80	0.714155144748847	0.25944169812529	0.709964671635094	0.21793569765511	1.24451165707907
Belize	1984	80	0.707207136705337	0.258478975278169	0.701326197807533	0.218862172029177	1.21978526516394
Belize	1985	80	1.01940256206371	0.253729005502577	1.00398994922623	0.552762289352439	1.55394930788882
Belize	1986	80	0.925015689261175	0.27975932973162	0.918671931760739	0.397797991699597	1.49968148395827
Belize	1987	80	0.920785844890926	0.281835607473642	0.912270708261434	0.398342374642851	1.49963678501911
Belize	1988	80	0.808853733613223	0.225221663849185	0.796579939831301	0.401729191068378	1.29956621282595
Belize	1989	80	0.819669146909875	0.260823997638268	0.816055889347771	0.318617081224679	1.34152179145222
Belize	1990	80	0.816236260649567	0.262264053288663	0.814408836248723	0.315681889843876	1.32142607724549
Belize	1991	80	1.04564857708014	0.292820176818368	1.03688664600853	0.49677161340369	1.65891724865025
Belize	1992	80	1.05262797619754	0.293057298268091	1.03846332397557	0.497151010491922	1.67710885214888
Belize	1993	80	1.05654418529249	0.294035252845512	1.05130447297323	0.49406144988474	1.66345253897402
Belize	1994	80	1.04953150838753	0.289331515663692	1.03997649265509	0.501134752478171	1.62932425165737
Belize	1995	80	1.05231312922116	0.293596742672438	1.04765975124163	0.49692102275594	1.63519669678445
Belize	1996	80	1.0499744764481	0.293775374230711	1.0464830035449	0.495719412778305	1.65829552800775
Belize	1997	80	1.05165029808142	0.293054218539013	1.03750159639454	0.509723061489875	1.67448583629753
Belize	1998	80	0.923515586500617	0.28034480585481	0.914462807935326	0.40122988715093	1.48301396526722
Belize	1999	80	0.924544342857111	0.283555452137067	0.918248936872421	0.397513698631263	1.50703412686469
Belize	2000	80	0.755713307855171	0.207070852854361	0.753868295125147	0.356413907363833	1.17108368990157
Belize	2001	80	0.713845489167115	0.25693473403258	0.714974707032031	0.214855748727421	1.21456172253338
Belize	2002	80	0.713424422961484	0.256241395175711	0.711201808947526	0.224694482571889	1.23076831826954
Belize	2003	80	0.821643661159276	0.267048363447827	0.818639287153027	0.314244448031739	1.34931899701621
Belize	2004	80	0.817480691853193	0.263667895434123	0.811371096643971	0.325097430772096	1.34761803519278
Belize	2005	80	0.821025771893115	0.263473439032134	0.818250299120442	0.313093077506213	1.3435154022619
Belize	2006	80	0.819679881297916	0.268122468507546	0.819007754027231	0.292074590800984	1.34264996651925
Belize	2007	80	0.820261591573104	0.263207392306404	0.820049999789572	0.315816361931789	1.33538262910014
Belize	2008	80	0.823437021217765	0.266157881917835	0.819182413653651	0.315243373336089	1.35180510720313
Belize	2009	80	0.798925307485274	0.27554960893142	0.797497372728805	0.248894658326355	1.32945793627733
Belize	2010	80	0.796930006701222	0.26932421716013	0.794533361130232	0.280060219537579	1.31313088685331
Guatemala	1946	90	0.213011086234349	0.121849325993396	0.21321578803128	-0.0245546721833899	0.451714415089265
Guatemala	1947	90	0.210222340459924	0.122491282952375	0.212855185652304	-0.0360385090232183	0.442875787664377
Guatemala	1948	90	0.240370699058622	0.117482451872202	0.239471755259819	0.0156050129843732	0.468432434732369
Guatemala	1949	90	0.207367060465908	0.119022091379655	0.207218158317974	-0.0257511110201835	0.439194334522972
Guatemala	1950	90	0.178966300832593	0.114152654415894	0.178439955979936	-0.0431259066970567	0.401383580865201
Guatemala	1951	90	0.206266679979124	0.11830740507368	0.206540949799668	-0.0219944078279235	0.433256676548347
Guatemala	1952	90	0.24396611540258	0.115968074009718	0.245243102029615	0.0109606793420305	0.465343185989088
Guatemala	1953	90	0.210790423494194	0.117167612039213	0.211929420008393	-0.0189109083915704	0.435227358089036
Guatemala	1954	90	-0.415789221732227	0.161477706897627	-0.404169420652881	-0.759624562214471	-0.125182297136496
Guatemala	1955	90	-0.532120520164616	0.17565960679456	-0.523849245251479	-0.906226792981257	-0.221387595015052
Guatemala	1956	90	-0.623591770080486	0.212476921341075	-0.608087106406724	-1.06538217368515	-0.249641027948059
Guatemala	1957	90	-0.716486318649648	0.230961842168888	-0.71103697693296	-1.18233792807622	-0.294984565202186
Guatemala	1958	90	-0.259684320660627	0.130563004822021	-0.255423726192752	-0.533889023601112	-0.0193730334199492
Guatemala	1959	90	-0.254288141146942	0.129556847413227	-0.250250765688785	-0.526967837143021	-0.0116703374649542
Guatemala	1960	90	-0.228247645424746	0.111530875031056	-0.224280232604605	-0.459402145500295	-0.020246505280047
Guatemala	1961	90	-0.286809091924302	0.132380085107324	-0.282948742961062	-0.565086458247919	-0.0431410097222717
Guatemala	1962	90	-0.25441428006855	0.127975519522833	-0.251041486178434	-0.5239518573337	-0.0200289022581985
Guatemala	1963	90	-0.887508492112991	0.252215275020987	-0.878320021238261	-1.40436853149065	-0.426694486245068
Guatemala	1964	90	-0.893327276589279	0.252613981632616	-0.890509838834013	-1.40056832025302	-0.423248460249257
Guatemala	1965	90	-0.831872833946981	0.199999271823865	-0.831043299650009	-1.22921943760765	-0.457081973901621
Guatemala	1966	90	-0.186440381423297	0.117958159889643	-0.183183834723398	-0.433375273451968	0.0332688933469284
Guatemala	1967	90	-0.187843568923659	0.11825918099007	-0.183418178695057	-0.429044916170489	0.0318494064885799
Guatemala	1968	90	-0.183630321731057	0.119359077481376	-0.177624206723321	-0.43389819478461	0.0329353159865788
Guatemala	1969	90	-0.186273423574561	0.116803806892237	-0.18116907766709	-0.425934292329231	0.0334074437030416
Guatemala	1970	90	-0.201710589195072	0.121120761743889	-0.195895516566524	-0.450714215518091	0.0229027832025044
Guatemala	1971	90	-0.200540240052302	0.121439067584728	-0.194895645780429	-0.456977596958777	0.0277521451708309
Guatemala	1972	90	-0.127008402007202	0.106494637259607	-0.124314852360507	-0.34859710020939	0.0709863139947651
Guatemala	1973	90	-0.111525624178527	0.105619096891867	-0.110234523599348	-0.331596996965941	0.0892633736094756
Guatemala	1974	90	-0.195934958367223	0.113198055727336	-0.190792787380467	-0.434445516984469	0.0127388986862246
Guatemala	1975	90	-0.194394337942164	0.11314063100121	-0.189453809530882	-0.42737665747765	0.016911887660221
Guatemala	1976	90	-0.197208945905063	0.113008333395196	-0.193435347063564	-0.433078188410778	0.0124660700879581
Guatemala	1977	90	-0.190647767630778	0.107630319173633	-0.188413012209715	-0.414559550218175	0.0145930748931207
Guatemala	1978	90	-0.210026433832377	0.117271935892755	-0.202100688028201	-0.463952377864486	0.00749956173913437
Guatemala	1979	90	-0.252613082829517	0.123299969645068	-0.247784035295646	-0.500086029971077	-0.0262924330186952
Guatemala	1980	90	-0.35595961649898	0.125191028748597	-0.350100352551596	-0.613383926132964	-0.12952537811083
Guatemala	1981	90	-0.334870917494648	0.131128312912608	-0.327288776089466	-0.612930555342616	-0.0957570719785263
Guatemala	1982	90	-1.06112649596894	0.223841053916453	-1.05801573090213	-1.50613721717123	-0.641593077835313
Guatemala	1983	90	-0.902306281939909	0.229686401547712	-0.894162495479164	-1.36865224323771	-0.474666522166726
Guatemala	1984	90	-0.487399875529629	0.161086332768315	-0.479578729889922	-0.818848504272872	-0.200176747011357
Guatemala	1985	90	-0.193602905747188	0.101630694393043	-0.191441001798772	-0.401848528998709	0.000363564259876701
Guatemala	1986	90	0.170992642431317	0.113657157646481	0.172888944945184	-0.0511919189476424	0.389620981546873
Guatemala	1987	90	0.173615325576628	0.111061446257836	0.171832151458647	-0.0377421136572887	0.394226226620046
Guatemala	1988	90	0.158551844727124	0.101453617017948	0.158899967735813	-0.0402554550950166	0.358113142079677
Guatemala	1989	90	0.171570863591409	0.112918257179903	0.171511971081549	-0.0531944118418496	0.395523271079011
Guatemala	1990	90	0.125982776453085	0.107864517080184	0.126012836587882	-0.0808209348529938	0.336078047691566
Guatemala	1991	90	0.108973308423828	0.105947032605383	0.108984791076016	-0.0902430675656374	0.316482347737521
Guatemala	1992	90	0.0957442946057257	0.106627575470781	0.0948848393956888	-0.106604082600919	0.303748127283895
Guatemala	1993	90	0.0279718623666947	0.105685391685211	0.026899097254051	-0.174760267693991	0.242381802530955
Guatemala	1994	90	0.0689681030829333	0.10627944580641	0.0663583019440588	-0.135286618178825	0.281643705272169
Guatemala	1995	90	0.0688391343476424	0.108049420619079	0.067261360976671	-0.136259737665642	0.289918708478736
Guatemala	1996	90	0.189945888050636	0.10910962236722	0.192079469742981	-0.0194893922114916	0.403617427613593
Guatemala	1997	90	0.241905588929742	0.10852762588961	0.243667700711683	0.0288941725128685	0.453355820051234
Guatemala	1998	90	0.242839244497633	0.108793343931401	0.243717967014694	0.0236492829889482	0.450291760225405
Guatemala	1999	90	0.202560028357776	0.114988388608163	0.206370728733835	-0.0216745326648335	0.421121799083627
Guatemala	2000	90	0.421126258046021	0.107290574833063	0.420272900091887	0.21765694579564	0.640546760224626
Guatemala	2001	90	0.519363326191997	0.146611354587891	0.51272289766853	0.252894813623589	0.83704219049009
Guatemala	2002	90	0.272085995007649	0.13056732055258	0.273197121663054	0.0123779997154878	0.517998442821139
Guatemala	2003	90	0.275479678413842	0.127354182701883	0.277764232489859	0.0203072242151905	0.516804132832971
Guatemala	2004	90	0.218562548293811	0.126474447707981	0.21918812225159	-0.0319937257156515	0.455732180309754
Guatemala	2005	90	0.215625818068856	0.128796140300339	0.215809999835631	-0.0391910571678922	0.464604420692943
Guatemala	2006	90	0.301450591356055	0.1224496657359	0.302327565325514	0.0631682751064968	0.543976064104536
Guatemala	2007	90	0.272212688342627	0.133644471985157	0.275807563410107	0.00736928675043882	0.52897476802325
Guatemala	2008	90	0.458594479994391	0.161830952288091	0.456512040155367	0.147140285543805	0.783583521443684
Guatemala	2009	90	0.288952613719121	0.218248425898315	0.284426410193141	-0.132458024702896	0.720556268295915
Guatemala	2010	90	0.380193011392943	0.174150080590033	0.380250318737454	0.0381828680170219	0.729587668843651
Guatemala	2011	90	0.297760868277688	0.183283733302275	0.29843584011779	-0.0608341607699257	0.654833506283064
Guatemala	2012	90	0.292477949251406	0.182698485853166	0.293307396721576	-0.0686666287860738	0.643749475796807
Honduras	1946	91	-0.573754100395467	0.232712306010278	-0.559960305448911	-1.06345501268293	-0.164211300639242
Honduras	1947	91	-0.578100307280184	0.239873076646587	-0.560613114490264	-1.08606782961548	-0.153279703120207
Honduras	1948	91	-0.608195950367075	0.222227291785776	-0.597971413510255	-1.07412827702553	-0.209287158333045
Honduras	1949	91	-0.344172277650612	0.165528657631748	-0.338008809355099	-0.687664286817457	-0.0374972927544508
Honduras	1950	91	-0.29328737334665	0.146299149027131	-0.292056671771709	-0.583408743993214	-0.0189784735735247
Honduras	1951	91	-0.342931725453536	0.165278592068924	-0.337660663786502	-0.680990044940929	-0.0376932584158105
Honduras	1952	91	-0.344099532967367	0.167159819446968	-0.336703870077282	-0.685150725018845	-0.0403729147193665
Honduras	1953	91	-0.340746595724846	0.165657690586453	-0.337226236985291	-0.663462352161401	-0.0268067775673277
Honduras	1954	91	-0.399833218184908	0.169532230406731	-0.399025725540155	-0.736972727455336	-0.0738421065647383
Honduras	1955	91	-0.878240303355428	0.204732387659643	-0.872556663773785	-1.2878695599338	-0.484790792120446
Honduras	1956	91	-0.741144808439053	0.239443733374727	-0.733018541186194	-1.22396788647086	-0.291151719054379
Honduras	1957	91	-0.125685902249221	0.110230303604894	-0.124468668371779	-0.340917721109808	0.0953155891785055
Honduras	1958	91	0.0970752231223494	0.114885705267279	0.0937886656461666	-0.117207765573765	0.325621083742867
Honduras	1959	91	0.0965340921431854	0.113209363132223	0.0959032574634291	-0.122746125170821	0.325731213369157
Honduras	1960	91	0.149150358833898	0.106740235591732	0.148636284975798	-0.0537964434273711	0.359120368476471
Honduras	1961	91	0.0964049719057479	0.11513946343819	0.0962002076831179	-0.12223737460936	0.321072128394029
Honduras	1962	91	0.100554011340304	0.114016957697996	0.097964804157527	-0.114352923155341	0.328324632715983
Honduras	1963	91	-0.205679193355012	0.114048079739841	-0.198774860785266	-0.442533215094426	0.0114602596045487
Honduras	1964	91	-0.744101404045332	0.23281812518807	-0.736874792797581	-1.2199991214439	-0.320747532681515
Honduras	1965	91	-0.397061264576129	0.15261468643915	-0.387219796411775	-0.712625066959412	-0.127342557782503
Honduras	1966	91	-0.432586533095232	0.177760323633887	-0.420908605644724	-0.820116528172422	-0.125107607079777
Honduras	1967	91	-0.427709831824962	0.177294930200213	-0.415810856250196	-0.818616469780569	-0.12081081979743
Honduras	1968	91	-0.428970594575819	0.173648491549269	-0.414967121289004	-0.797508094368483	-0.120919924196844
Honduras	1969	91	-0.425274916359923	0.17792722343284	-0.409009516636699	-0.814556526113292	-0.119629495785879
Honduras	1970	91	-0.428970273922274	0.177542879863799	-0.415129078454247	-0.812937734823479	-0.118642874951889
Honduras	1971	91	-0.0536670885813842	0.108278313051611	-0.054423221409946	-0.265870723818336	0.155999780308665
Honduras	1972	91	-0.576614966259189	0.179860303027459	-0.568185019769236	-0.949337313405717	-0.250233743301945
Honduras	1973	91	-0.536804891558585	0.175189273105744	-0.528495114639975	-0.903839993540454	-0.219260112637357
Honduras	1974	91	-0.53585801739856	0.175816273706163	-0.528863964565329	-0.899386688990909	-0.210378244831184
Honduras	1975	91	-0.53794586595078	0.174519174045011	-0.528898601671337	-0.902581521778389	-0.214151947964315
Honduras	1976	91	-0.533395624713964	0.176823976750098	-0.526043760740114	-0.904068089188153	-0.207622656033702
Honduras	1977	91	-0.574450956006891	0.171546331199991	-0.567145202701055	-0.936255035063747	-0.261824957592403
Honduras	1978	91	-0.589284774736621	0.183253352618268	-0.582025311383776	-0.960635221952974	-0.250880742714979
Honduras	1979	91	-0.590365777155718	0.181415521281926	-0.584373223741614	-0.960436573760596	-0.254499556914029
Honduras	1980	91	-0.628209813719501	0.169375358692623	-0.62219008995741	-0.974077744460724	-0.313600566885917
Honduras	1981	91	-0.273726250491668	0.130020823039087	-0.264886550665559	-0.552155753244892	-0.0420097302545705
Honduras	1982	91	0.267724031808846	0.108018216817657	0.269655815720375	0.0511283350998448	0.476749125712205
Honduras	1983	91	0.225823422110181	0.115089043843072	0.227481569257238	0.00290648915546951	0.449130731815963
Honduras	1984	91	0.245242678039729	0.112964450002524	0.248470676791249	0.0207674985866451	0.461273193579504
Honduras	1985	91	0.313704171656896	0.1004458177472	0.316553992873107	0.107736881938512	0.507105704966728
Honduras	1986	91	0.24563966297924	0.111430204436042	0.247321382951713	0.0208045399121714	0.461140178920804
Honduras	1987	91	0.245276449330497	0.111350549536888	0.247134448575041	0.0247761116763583	0.461231746789407
Honduras	1988	91	0.274541334422141	0.101618832507741	0.2754231274769	0.0746863344775163	0.468907899114904
Honduras	1989	91	0.262605130653033	0.109261428417432	0.264657115344463	0.0429739267213662	0.476104546362314
Honduras	1990	91	0.298636287266676	0.108182878513434	0.301713404818937	0.0823747758137082	0.512820037016952
Honduras	1991	91	0.296618956047544	0.105437170830943	0.297106410129366	0.0890858980998093	0.501219112231408
Honduras	1992	91	0.298018640289881	0.107967658352615	0.300232841714148	0.0793867333878499	0.505306085278494
Honduras	1993	91	0.264165213525375	0.10576945770273	0.263971801058452	0.0539274431123965	0.473194436572342
Honduras	1994	91	0.262959059938974	0.107142974761106	0.263400587853593	0.0534325926992313	0.47304074443934
Honduras	1995	91	0.26490867577092	0.107712167809791	0.267207599288829	0.0506263638949989	0.473924991664748
Honduras	1996	91	0.262436670537578	0.107544926524253	0.262877995140057	0.0550759937539132	0.476615584387511
Honduras	1997	91	0.45740980956417	0.102587784721006	0.457069498298496	0.252738289313209	0.659633583492145
Honduras	1998	91	0.459279859421847	0.104738735278625	0.458373973376257	0.256125780551509	0.671402745840231
Honduras	1999	91	0.638994531972383	0.145848476774721	0.629540029971862	0.376912410477054	0.950847594284492
Honduras	2000	91	0.621591937574483	0.126880974194911	0.615158663582739	0.387610785471926	0.881353610919523
Honduras	2001	91	0.580331881007607	0.156494748494174	0.571535428924392	0.29371099116772	0.912502665045619
Honduras	2002	91	0.582244739427551	0.157265310144545	0.573114235865456	0.303944059323267	0.912346307883677
Honduras	2003	91	0.581714535767748	0.156622344660557	0.57281592352472	0.297058582807325	0.921734799803954
Honduras	2004	91	0.58093829079233	0.153795567398719	0.571378768393704	0.309597546140984	0.908750097148556
Honduras	2005	91	0.54637371818496	0.148674190044641	0.539746265293669	0.273834399567723	0.856699711457087
Honduras	2006	91	0.518119750864013	0.136874200661631	0.511552992758823	0.265371369910975	0.801161091736897
Honduras	2007	91	0.508188488209423	0.149924982740929	0.501938620216908	0.234152733267311	0.824809550930344
Honduras	2008	91	0.446633497985366	0.160660377210611	0.445851260733764	0.13765625267784	0.763173558728854
Honduras	2009	91	0.208848446868338	0.211255666897873	0.210886124300993	-0.204418769951472	0.621287297200657
Honduras	2010	91	0.202726927651185	0.167321558669121	0.202055700331178	-0.123820175714464	0.527437501443902
Honduras	2011	91	0.195458618653317	0.18127844205138	0.196676108568142	-0.161151613460989	0.553427468623608
Honduras	2012	91	0.195028172696828	0.182324641666286	0.196680245178567	-0.169382636468758	0.549276640330136
El Salvador	1946	92	-1.10859224970479	0.300000099585777	-1.10470420473932	-1.71138611452948	-0.542278001085797
El Salvador	1947	92	-1.10874660013956	0.302199350768124	-1.0981600882673	-1.71385239585989	-0.540741894505777
El Salvador	1948	92	-1.13313325991184	0.277849369953235	-1.12461203012635	-1.68512972014946	-0.602280818592613
El Salvador	1949	92	-1.13283524361434	0.276838272408998	-1.12823138769919	-1.68815303774558	-0.596882943867604
El Salvador	1950	92	-0.397096407385589	0.161781333739191	-0.39290936020574	-0.728776149364587	-0.0913624360955929
El Salvador	1951	92	-0.491161680766549	0.19074786845365	-0.48062438794961	-0.885048031285296	-0.144460327269707
El Salvador	1952	92	-0.710124274863392	0.234669154287774	-0.70856128849353	-1.18373559851033	-0.27218225172668
El Salvador	1953	92	-0.713684963728544	0.23703674751808	-0.706414315496559	-1.20156507009163	-0.276480067132799
El Salvador	1954	92	-0.711166142291012	0.231643646211336	-0.701248390226362	-1.18499418500999	-0.284694566753062
El Salvador	1955	92	-0.587986046061771	0.185663893126284	-0.58306081378321	-0.961346513968936	-0.2420514299234
El Salvador	1956	92	-0.66339192257993	0.225428487534764	-0.658434271243102	-1.11745348541844	-0.243002148668203
El Salvador	1957	92	-0.672456018979915	0.225732535180825	-0.662569260164006	-1.15079912341426	-0.268495238460965
El Salvador	1958	92	-0.661343799104816	0.228141144542691	-0.657244345305436	-1.12157326925004	-0.229563925005083
El Salvador	1959	92	-0.666753868674881	0.228149199914507	-0.658239902124879	-1.13315500131916	-0.25654275545499
El Salvador	1960	92	-0.684267286676607	0.184511924416356	-0.676552626764348	-1.06027202392794	-0.342305782525557
El Salvador	1961	92	-0.701656683951677	0.230663933440844	-0.687830509532408	-1.17739580595806	-0.283987252043381
El Salvador	1962	92	-0.511902491919907	0.201861568987708	-0.506664364648853	-0.928906576785383	-0.137186959841075
El Salvador	1963	92	-0.515580090154242	0.207388016546282	-0.506342774651086	-0.943571954519298	-0.138467104369924
El Salvador	1964	92	-0.378853647501259	0.187108501935643	-0.369912398639902	-0.765115933355622	-0.0350660278145295
El Salvador	1965	92	-0.273198982713289	0.152851511988342	-0.265821114727173	-0.602605476654021	0.006050736263687
El Salvador	1966	92	-0.377843099626886	0.183020455581456	-0.368538188135843	-0.768032463687225	-0.0579128188648319
El Salvador	1967	92	-0.147955958553215	0.1126192377675	-0.144311465087566	-0.372808504655969	0.0677857939914193
El Salvador	1968	92	-0.14677479662615	0.111809239948648	-0.142804501776274	-0.377362942622107	0.0589962821286001
El Salvador	1969	92	-0.147027913219347	0.112023258513054	-0.143751956057219	-0.373670321502843	0.0638051424757183
El Salvador	1970	92	-0.15027282670348	0.113400621864703	-0.147438878504598	-0.37821811715748	0.0617097606958753
El Salvador	1971	92	-0.147671483976061	0.111432833619478	-0.144425201764036	-0.373480166375554	0.0682213084694255
El Salvador	1972	92	-0.209598443634079	0.118093388586884	-0.202737009909944	-0.456053991118401	0.00396292301799622
El Salvador	1973	92	-0.205596331674013	0.120033503689983	-0.20064303386549	-0.456537267989864	0.0141546138236601
El Salvador	1974	92	-0.209140576738529	0.118754710127179	-0.204828637522586	-0.450890216869999	0.0110010442008071
El Salvador	1975	92	-0.204817490352738	0.118950325050744	-0.201317607941308	-0.4497577042934	0.0153602264081967
El Salvador	1976	92	-0.226788295330001	0.122729924971192	-0.222386142631569	-0.482478189381035	0.00154588586967017
El Salvador	1977	92	-0.333777540673608	0.133598667936752	-0.328172977263029	-0.617282070467036	-0.0896648793023775
El Salvador	1978	92	-0.426574925391956	0.156786934508928	-0.41616462558172	-0.760042472881021	-0.149721276428833
El Salvador	1979	92	-0.591968812329396	0.182225971112369	-0.587834356965362	-0.961120499999709	-0.2548149031949
El Salvador	1980	92	-0.860604960504906	0.179693755926463	-0.858556820080733	-1.22543018692009	-0.504527654640058
El Salvador	1981	92	-0.569979535086004	0.179588411259404	-0.562473775220542	-0.940409135697377	-0.246226417854418
El Salvador	1982	92	-0.34585407734411	0.144593209414094	-0.336187280646587	-0.662487052330467	-0.0906366415699227
El Salvador	1983	92	-0.374265824558834	0.156082669239524	-0.363650255906184	-0.703975860616475	-0.0935907831915637
El Salvador	1984	92	0.00375618808107342	0.108478594120556	0.00465988384901998	-0.212773579926486	0.211567457896928
El Salvador	1985	92	-0.00283455925402908	0.097250940808598	-0.00153308850554165	-0.195273302084748	0.188886389372204
El Salvador	1986	92	0.020057598618418	0.109586845412901	0.0208913834946507	-0.198053210971563	0.235034282921846
El Salvador	1987	92	0.0206602769532141	0.108854289241829	0.020296931583399	-0.191443536304899	0.234379197254777
El Salvador	1988	92	0.00551534718491449	0.0977465469055594	0.00290154272249571	-0.18332244319138	0.200149661862205
El Salvador	1989	92	0.00241442229131052	0.109268024468734	0.00224514998457577	-0.21099012476935	0.216269711738898
El Salvador	1990	92	-0.0112673654745316	0.10190296537499	-0.0100745558512367	-0.21298177462612	0.184195319056561
El Salvador	1991	92	0.0340498232982949	0.103603411511972	0.0357059181023182	-0.168585553160154	0.238923262535114
El Salvador	1992	92	0.221185450917496	0.106884281924373	0.22079118393287	0.0138141121855482	0.434877914210128
El Salvador	1993	92	0.218161976241233	0.109538950829721	0.220113862050548	0.000416063080298947	0.427687420996692
El Salvador	1994	92	0.601158015052943	0.131383469683617	0.595839846444931	0.363760958077433	0.871969315475993
El Salvador	1995	92	0.597846321570654	0.130654199256655	0.590717221916427	0.363582121063669	0.872297828092919
El Salvador	1996	92	0.59890884892119	0.132865392990042	0.588919241258828	0.370660025126748	0.890354264413043
El Salvador	1997	92	0.687412411984534	0.146723094453414	0.679023121877428	0.429696781161471	1.00096499667526
El Salvador	1998	92	0.685869878727014	0.145886492691336	0.677460429556699	0.424700926252786	0.995966824145594
El Salvador	1999	92	0.67601699812915	0.147826371685748	0.668440841074521	0.412886865816751	0.989233491850214
El Salvador	2000	92	0.701326739375153	0.14455962863859	0.692900896648941	0.442481248601321	1.001330754615
El Salvador	2001	92	0.581759846340541	0.158231427274994	0.57302946530039	0.289182160535499	0.912327507352563
El Salvador	2002	92	0.584188673180933	0.156654562787586	0.574855962145063	0.300923399460053	0.912669444536191
El Salvador	2003	92	0.57927105805554	0.156741329547453	0.571905195750358	0.296271347380969	0.90225943364962
El Salvador	2004	92	0.619464489801774	0.162080722332491	0.608305542758227	0.330577909424219	0.958138886111205
El Salvador	2005	92	0.616164162606152	0.161014627395823	0.606414139350292	0.328659322994109	0.953474691022202
El Salvador	2006	92	0.580912605442045	0.144085207476992	0.576876875509377	0.316189688940488	0.879083192924494
El Salvador	2007	92	0.582505687280432	0.162902970479248	0.573656766397177	0.291511379061009	0.9399277727258
El Salvador	2008	92	0.53502471795937	0.165901851645828	0.532530793699822	0.212750779819919	0.860689951507293
El Salvador	2009	92	0.552484621329048	0.213007951767735	0.551014308440101	0.141895164008461	0.976134891506842
El Salvador	2010	92	0.560021632692668	0.173644130345969	0.561153396782383	0.213358660195339	0.893136053889157
El Salvador	2011	92	0.560418824891008	0.184010951730615	0.562435714751812	0.201195513712843	0.916609431372083
El Salvador	2012	92	0.558414959887113	0.190540866560987	0.559168754282294	0.184057656828634	0.935771707316346
Nicaragua	1946	93	-1.10227987082027	0.299838208116231	-1.09490981965309	-1.70603927141747	-0.531848703015131
Nicaragua	1947	93	-1.10312076960139	0.299285630896435	-1.09250123854378	-1.70008871074301	-0.54040330102666
Nicaragua	1948	93	-1.00826413770296	0.257226514291399	-1.00592878390232	-1.5322473445073	-0.514956293991549
Nicaragua	1949	93	-1.0059612228288	0.254031389677414	-1.00242971499548	-1.52294838824911	-0.525396901157286
Nicaragua	1950	93	-0.756545483772429	0.198255066408813	-0.750785345520092	-1.15193024448405	-0.386616203650317
Nicaragua	1951	93	-0.887126431937606	0.247870732782331	-0.879979793917451	-1.38114290243704	-0.420101976185404
Nicaragua	1952	93	-0.885509971495701	0.24887357644103	-0.87537940543604	-1.38075591516427	-0.431193544029199
Nicaragua	1953	93	-0.879454643980828	0.251192273150396	-0.871033199443595	-1.39394674102064	-0.410420151109657
Nicaragua	1954	93	-0.886858028096563	0.249881252552302	-0.878552734526223	-1.38745351416175	-0.422320366022015
Nicaragua	1955	93	-0.692738792643486	0.192579176250551	-0.686034014588207	-1.07662690414496	-0.334378392982286
Nicaragua	1956	93	-0.883699722134308	0.249453465842067	-0.874903050947907	-1.38486020768046	-0.418966696109414
Nicaragua	1957	93	-0.879044201622077	0.251311445780624	-0.874025613074526	-1.38669567896576	-0.40443397332489
Nicaragua	1958	93	-0.884223517065248	0.246189225758405	-0.879251474113909	-1.37834435458421	-0.412779233371277
Nicaragua	1959	93	-0.884834701859964	0.251529439046764	-0.882890585531672	-1.39629270725835	-0.41450901748543
Nicaragua	1960	93	-0.785444271332517	0.192650978307162	-0.782436167953383	-1.16616087735978	-0.409030664888929
Nicaragua	1961	93	-0.882618267002417	0.238985120473414	-0.877639035056213	-1.365688721302	-0.427063051931963
Nicaragua	1962	93	-0.88324554586374	0.246877952646651	-0.880557355570857	-1.37267538250271	-0.411982606736853
Nicaragua	1963	93	-0.785782240049818	0.239441494600019	-0.77806672472491	-1.27644334205371	-0.338007358971408
Nicaragua	1964	93	-0.79042852154893	0.242153733407624	-0.781404312712134	-1.2813347352199	-0.336764113724358
Nicaragua	1965	93	-0.631461928969689	0.189348621902924	-0.63289894743615	-1.01215971157637	-0.267637597143602
Nicaragua	1966	93	-0.787559872161072	0.238580728021867	-0.783969904054235	-1.26920893270512	-0.339537236151695
Nicaragua	1967	93	-0.601576597513181	0.205576627843337	-0.595003138418218	-1.02207566852311	-0.218398036474375
Nicaragua	1968	93	-0.601891453051344	0.205158929035517	-0.597589269735733	-1.02640945234563	-0.216738753016416
Nicaragua	1969	93	-0.596568940118689	0.202327804825281	-0.587736565661933	-1.01995326777411	-0.218272354600948
Nicaragua	1970	93	-0.60188742089141	0.205054531556064	-0.596200236373016	-1.02053566720837	-0.220721004175352
Nicaragua	1971	93	-0.67332806583074	0.212618914147336	-0.667757264529126	-1.11598662836352	-0.26749156301629
Nicaragua	1972	93	-0.573832176756161	0.185897482123824	-0.568284045277015	-0.951979885731029	-0.230500021300787
Nicaragua	1973	93	-0.675261908345948	0.194479766863993	-0.671508399062015	-1.07663717067091	-0.305219987352472
Nicaragua	1974	93	-0.620321271289823	0.192416341477957	-0.616534508487086	-1.00376684916174	-0.261489363037837
Nicaragua	1975	93	-0.681560325416474	0.197696492552567	-0.676463994641259	-1.0815042375667	-0.309839857851354
Nicaragua	1976	93	-0.678927207306341	0.191672448271693	-0.675005164937055	-1.06034243737677	-0.312447942310577
Nicaragua	1977	93	-0.770186740081781	0.186691627490413	-0.764908117162291	-1.15376105953941	-0.420865012047262
Nicaragua	1978	93	-0.741741197527207	0.194164271356752	-0.737089986869326	-1.13399901414908	-0.378381909771564
Nicaragua	1979	93	-0.613598430450992	0.192840317623485	-0.610220811556946	-1.01702404817516	-0.243153868342091
Nicaragua	1980	93	-0.714794988725946	0.171258592309246	-0.712023549756845	-1.06003387019077	-0.391978282339255
Nicaragua	1981	93	-0.740200744879584	0.19751490146578	-0.735892535039632	-1.13803298113795	-0.361919049524434
Nicaragua	1982	93	-0.73429072263762	0.201672099418668	-0.730544885098691	-1.14664376923067	-0.356942800522661
Nicaragua	1983	93	-0.654541327793833	0.206128604583923	-0.647411859682572	-1.07793574106701	-0.271745963581739
Nicaragua	1984	93	-0.0832666368593822	0.106606816238968	-0.0825456100895403	-0.292464385110751	0.121094179908441
Nicaragua	1985	93	0.0162230501810495	0.0980487030619328	0.0136262997058248	-0.171015697510078	0.210302187357694
Nicaragua	1986	93	0.00494870923316404	0.108083665566909	0.00386764895544542	-0.200470771753299	0.222334888166469
Nicaragua	1987	93	0.0296700348855117	0.111350179138416	0.0288735631259212	-0.181674174672499	0.255968235251096
Nicaragua	1988	93	0.0106661467873158	0.100555144559806	0.0100028374643836	-0.183738418305597	0.209647949176779
Nicaragua	1989	93	0.0562583007202626	0.10837030184976	0.053294575967106	-0.148518236845431	0.276001935621238
Nicaragua	1990	93	0.441475548464132	0.102892402642665	0.441585773468134	0.2353315177252	0.640878862706867
Nicaragua	1991	93	0.446339950934483	0.103044442143336	0.444685398594935	0.247626807565321	0.647471957975044
Nicaragua	1992	93	0.42949537734535	0.104493715914775	0.428987666628393	0.22597192076886	0.639293450558094
Nicaragua	1993	93	0.402666833844492	0.103920146532386	0.403164248724792	0.19376463741482	0.601710299026474
Nicaragua	1994	93	0.40040408043852	0.102952281872435	0.399642308670136	0.204592355319589	0.60155954320592
Nicaragua	1995	93	0.445899111843189	0.102191128618277	0.444590328150647	0.246387373647483	0.652724206266504
Nicaragua	1996	93	0.69015686834158	0.149592914607195	0.67997524093764	0.425804763500548	1.01152126070279
Nicaragua	1997	93	0.6959409172347	0.150361382732844	0.684304096162297	0.428511383490057	1.0148965676579
Nicaragua	1998	93	0.727369753361606	0.154942546704129	0.719749852305737	0.457501203073996	1.05789754364378
Nicaragua	1999	93	0.677725619498882	0.149504702180457	0.668936786592941	0.410454073257316	0.994157109004137
Nicaragua	2000	93	0.735827251967025	0.151327603879445	0.724594467101731	0.463450417665092	1.05384022793776
Nicaragua	2001	93	0.524239763549406	0.143422516114475	0.517829380506505	0.255698111237008	0.818389220245238
Nicaragua	2002	93	0.522807622861567	0.141241979078005	0.516635943958964	0.257450167132518	0.82051512117944
Nicaragua	2003	93	0.520782330479373	0.142141491908624	0.516041906882873	0.254948522865225	0.816695509311768
Nicaragua	2004	93	0.522471444433419	0.141382254510575	0.516194248389807	0.261957186404176	0.811891328106288
Nicaragua	2005	93	0.523861142482401	0.140367518207389	0.517495612835439	0.266905234954983	0.816232236066049
Nicaragua	2006	93	0.51485214233816	0.134793654334527	0.508708327680668	0.267860357578266	0.797016809790354
Nicaragua	2007	93	0.693594025397843	0.181573815675102	0.682716134677353	0.357694789635174	1.07325171938457
Nicaragua	2008	93	0.595843293301673	0.166514846284557	0.596683605368989	0.26860523149825	0.918237084811525
Nicaragua	2009	93	0.514164350405693	0.211644986638107	0.514898120462373	0.10789534943306	0.930288540131089
Nicaragua	2010	93	0.389936143163698	0.165597801866735	0.391759756805963	0.0662226029590308	0.704565589516685
Nicaragua	2011	93	0.269599276180661	0.182437369661045	0.266366635478902	-0.0932287399425867	0.622150071734913
Nicaragua	2012	93	0.264679716974497	0.181687513194236	0.261922750312953	-0.0955410585294659	0.626562859703517
Costa Rica	1946	94	0.369067358615182	0.147514660823928	0.366820315572351	0.0861138819389098	0.663195998420221
Costa Rica	1947	94	0.368373012831493	0.146925981374603	0.368088655153276	0.0791119326514965	0.65595855558507
Costa Rica	1948	94	-0.207492621808342	0.121325396296027	-0.201183540941321	-0.46361084452263	0.0175176470782576
Costa Rica	1949	94	0.243631420128904	0.113040527801796	0.247694081957913	0.0196204139893446	0.463427824382569
Costa Rica	1950	94	0.353366341533056	0.10789069439568	0.353996273762783	0.139356480178495	0.563919025173402
Costa Rica	1951	94	0.343485427269675	0.115183742746684	0.34625315319077	0.115446873795087	0.561229344584673
Costa Rica	1952	94	0.345509843903035	0.114096915769079	0.34971129481041	0.114223632390143	0.560648104913609
Costa Rica	1953	94	0.559743390429058	0.128976147643189	0.556087156941074	0.31886749875415	0.818570019964423
Costa Rica	1954	94	0.557351368122371	0.129575486448811	0.549643408429969	0.314223434390238	0.817179776127597
Costa Rica	1955	94	0.539439527772539	0.12180852928604	0.535129849703526	0.314307891821512	0.794686703851518
Costa Rica	1956	94	0.553604770837705	0.131396961017554	0.547525587063835	0.312225207260832	0.824094286639379
Costa Rica	1957	94	0.558398531917145	0.131533707033507	0.552853092027247	0.31727110024873	0.833122580925971
Costa Rica	1958	94	0.901710157429334	0.221710676522848	0.881791325146452	0.522807158358889	1.3726465788736
Costa Rica	1959	94	0.901217454991186	0.214252328223028	0.885657138049972	0.525266162968124	1.35658080366716
Costa Rica	1960	94	0.957932265259129	0.20598095003858	0.94493486407915	0.59213145027699	1.40156178440195
Costa Rica	1961	94	0.898075595575941	0.218927036930736	0.886908587500775	0.514360061108908	1.3581993758128
Costa Rica	1962	94	0.903421875458733	0.212696554093759	0.888413627050454	0.538204695183934	1.35138962011581
Costa Rica	1963	94	0.905261756304189	0.219616286624531	0.887871256813725	0.526553726822238	1.37393457747606
Costa Rica	1964	94	0.903103222577421	0.218844700127391	0.882300281351577	0.53027374677503	1.38719382075781
Costa Rica	1965	94	0.948917181160401	0.213464335552987	0.937529453769327	0.569850693949282	1.40575050322074
Costa Rica	1966	94	0.904592010573777	0.214590040922471	0.886939448497463	0.542231362556135	1.36658622388567
Costa Rica	1967	94	0.898186147238045	0.213377966331531	0.881704557459149	0.526326361208907	1.3654765871748
Costa Rica	1968	94	0.901623350426092	0.216792399040018	0.89161933320163	0.518921929575351	1.35636684763831
Costa Rica	1969	94	0.899475202530805	0.218104935947154	0.88682380390172	0.525238347284493	1.36712859091037
Costa Rica	1970	94	0.98132355934296	0.228758787202286	0.966302809103512	0.581928632583151	1.46409380167468
Costa Rica	1971	94	0.978661549249595	0.231980490766373	0.963523734268545	0.568768625602816	1.48029205334767
Costa Rica	1972	94	1.13929964341192	0.225971352940318	1.13243686987282	0.724744823169594	1.61239761691597
Costa Rica	1973	94	1.1371418224679	0.222936739629951	1.12726036102351	0.718254120613379	1.59727087889624
Costa Rica	1974	94	1.21054608665292	0.228532856023791	1.20464241401353	0.791045424443745	1.67560063406701
Costa Rica	1975	94	1.40487151841516	0.25909199768191	1.39167019361868	0.933197854042884	1.94750291681466
Costa Rica	1976	94	1.40835188641837	0.264424467282931	1.39598050351275	0.924275069808183	1.9532202185036
Costa Rica	1977	94	1.40276889652865	0.258889433743018	1.39085872279033	0.917786224318486	1.93545901999783
Costa Rica	1978	94	1.41501940142338	0.260813652020953	1.39862142384656	0.92839625791447	1.96093850781776
Costa Rica	1979	94	1.40293452614614	0.260651199223952	1.3920524487258	0.926637955665534	1.95782901103664
Costa Rica	1980	94	1.42169373141097	0.251247208715174	1.40644833326827	0.970050715847898	1.95156728897732
Costa Rica	1981	94	1.21693541425837	0.235141306106346	1.20808130000222	0.781246753230788	1.70732219794507
Costa Rica	1982	94	1.13477099084148	0.222084693572578	1.12658956927131	0.724058752961486	1.59185213916043
Costa Rica	1983	94	1.19610130463283	0.252105664876571	1.18074941463217	0.746016551198406	1.72200833964853
Costa Rica	1984	94	1.18851331690118	0.251920967396437	1.17267072186601	0.733878259363839	1.71915149585784
Costa Rica	1985	94	1.23293793323603	0.243386225511441	1.22022529352469	0.794288106700837	1.74971422667545
Costa Rica	1986	94	1.28485606087783	0.262602533390731	1.27294771749993	0.809595378396084	1.84289420870211
Costa Rica	1987	94	1.29189621140003	0.2725324268895	1.28320467682676	0.797542240076037	1.84961965680505
Costa Rica	1988	94	1.29504704667256	0.266735142468391	1.28392665135703	0.816530351176355	1.87306880876181
Costa Rica	1989	94	1.28975210924377	0.267119825642107	1.27749886703293	0.798923964956235	1.83773339240631
Costa Rica	1990	94	1.29043499428888	0.267477518225343	1.27727872158109	0.797701965405134	1.85591847480492
Costa Rica	1991	94	1.29589557225985	0.261826489546922	1.2808774887759	0.826975758064856	1.84223991069613
Costa Rica	1992	94	1.29177588926126	0.264642183787916	1.27994127134625	0.817024701055925	1.84942652280073
Costa Rica	1993	94	1.09124154750457	0.217563674755683	1.08259844794375	0.692766391824978	1.53580499015837
Costa Rica	1994	94	1.16026844392641	0.225587406080938	1.15276538667452	0.748944213942663	1.62241703602769
Costa Rica	1995	94	1.16033286646739	0.230922468098034	1.1532300689914	0.729280769977561	1.62948770221117
Costa Rica	1996	94	1.16299016345626	0.223082933828043	1.16009963152292	0.748646871464533	1.6297367469841
Costa Rica	1997	94	1.16469421639059	0.227617702801341	1.15328461414606	0.746125838234974	1.63511104040197
Costa Rica	1998	94	1.09031258928696	0.222465773441186	1.07964581036496	0.681048262552001	1.54022446675061
Costa Rica	1999	94	1.08812404301483	0.221745222921494	1.07784875891971	0.678371569025301	1.54794005510299
Costa Rica	2000	94	1.11966721093946	0.211311488231811	1.10683288870245	0.732247154974025	1.56099192179586
Costa Rica	2001	94	1.08360188850225	0.224987291478676	1.07783228524801	0.667470169356306	1.53888366085048
Costa Rica	2002	94	1.0080116538659	0.221536469632668	1.00102803017578	0.589628671202428	1.4704887737957
Costa Rica	2003	94	1.00913510962524	0.221708492843797	0.999625417943118	0.590902378799963	1.46911593861298
Costa Rica	2004	94	1.19480860300433	0.253849450772213	1.1846193071471	0.737122560001845	1.72943465296533
Costa Rica	2005	94	1.18539240290051	0.25259707760768	1.17064222632353	0.728748670020814	1.71090683021281
Costa Rica	2006	94	1.34707947336203	0.201066051682147	1.34222196521473	0.96776433701658	1.75503250400165
Costa Rica	2007	94	1.28800511620794	0.269110487270885	1.27663876086518	0.792460835244381	1.85670970124753
Costa Rica	2008	94	1.34809601301217	0.202874183353129	1.3445534059544	0.971380701232853	1.76704238377656
Costa Rica	2009	94	1.17261027168112	0.264009414208356	1.16225566801389	0.678028406310392	1.71468478633654
Costa Rica	2010	94	1.40940334094978	0.209895162483153	1.40806959453064	1.00438779113403	1.82194584616078
Costa Rica	2011	94	1.56526631241331	0.247795423779629	1.55572059555056	1.11001251502112	2.06092856556526
Costa Rica	2012	94	1.56608563312023	0.247108141097887	1.55851696133557	1.10699896143633	2.0803465592957
Panama	1946	95	-0.564500922917915	0.248866063269001	-0.55197055463674	-1.0827368574591	-0.114048901348354
Panama	1947	95	-0.568167842875494	0.247814109914727	-0.556448302718724	-1.09202044780563	-0.114884867243081
Panama	1948	95	-0.280108314239642	0.152670559441822	-0.26980003671535	-0.6023143708216	-0.0101472058981572
Panama	1949	95	-0.13620149225297	0.126942741281881	-0.132951309796438	-0.39557384054709	0.1058382814183
Panama	1950	95	-0.126447974061396	0.117297663384086	-0.124116041463998	-0.367378177690407	0.0983459356618561
Panama	1951	95	-0.252924469423929	0.14961615290978	-0.246537183344832	-0.566489985655071	0.0226902666569129
Panama	1952	95	-0.186664474137585	0.133518416077645	-0.182792859897396	-0.465817994700381	0.0589298833220434
Panama	1953	95	-0.185104693236113	0.129615368811291	-0.180478640463582	-0.451011089722687	0.0565150445113328
Panama	1954	95	-0.215228068034431	0.13677065755842	-0.211271956818981	-0.502901549145833	0.0353652826101739
Panama	1955	95	-0.132774344962286	0.118317084817907	-0.129156965239071	-0.375445737509071	0.0987843497107717
Panama	1956	95	0.255347853560582	0.116435659451454	0.253251141393595	0.0224155938391033	0.488133687921222
Panama	1957	95	0.256717272185815	0.118062515447706	0.255819053938737	0.034151717363599	0.48733490454545
Panama	1958	95	0.255928200983551	0.119846450316645	0.255269522947228	0.0247012131541723	0.488974279236823
Panama	1959	95	0.277330298970722	0.120181835486372	0.275610988168399	0.0464690597668364	0.516126425628444
Panama	1960	95	0.273846113969339	0.108764790992602	0.272397222072273	0.0609263520636558	0.492284010915658
Panama	1961	95	0.302791461854407	0.118393190753933	0.302001690233202	0.0672641768199358	0.548007724558345
Panama	1962	95	0.300188449889899	0.12154462334283	0.300084531100031	0.062214364724449	0.54046578185815
Panama	1963	95	0.297923973012407	0.118579971154945	0.296214431705659	0.0682105750163843	0.534564600242618
Panama	1964	95	0.109243050597699	0.129710603174582	0.108737476241276	-0.144512359852158	0.364836318033639
Panama	1965	95	0.112581509403477	0.122810457273708	0.112034167786156	-0.118472215574558	0.355646124348114
Panama	1966	95	0.108887003372743	0.129948385377968	0.107577476169946	-0.140037719573025	0.3634170374124
Panama	1967	95	0.113695520599408	0.129832254273715	0.1107247958157	-0.137085596119655	0.368465260237787
Panama	1968	95	-0.853712663867285	0.252978056141866	-0.848628470545504	-1.37152456284956	-0.38409483125991
Panama	1969	95	-1.13917870927937	0.279753676423104	-1.14218791765318	-1.6895199276976	-0.596355619247496
Panama	1970	95	-1.13354718392168	0.278033490994479	-1.12634209876221	-1.69514455773744	-0.614528195246851
Panama	1971	95	-1.12684065897936	0.275464809009351	-1.11787484864831	-1.68012980922432	-0.608015713081609
Panama	1972	95	-0.958858442050162	0.213593081276505	-0.960958617290517	-1.37497119068411	-0.548211223167818
Panama	1973	95	-0.9552455810846	0.21407289492597	-0.951311835354463	-1.38697260092251	-0.543795258989689
Panama	1974	95	-0.961882881912252	0.215047668538142	-0.963233508683274	-1.38479746484193	-0.54936284195412
Panama	1975	95	-0.958974797044977	0.214102410941502	-0.955642771500543	-1.38002552599763	-0.549026574163102
Panama	1976	95	-0.963064150784315	0.217461647919394	-0.961367765885766	-1.40623773005295	-0.545581256087601
Panama	1977	95	-0.818454600065131	0.200383759783449	-0.809962287964696	-1.2227782394117	-0.444811179335917
Panama	1978	95	-0.627295865929859	0.19130451775639	-0.619828791924246	-1.01888700354213	-0.274703212362024
Panama	1979	95	-0.63095352115652	0.18930504748295	-0.625614145354204	-1.0165599759524	-0.279047762406575
Panama	1980	95	-0.624515392009238	0.166809876981421	-0.623144045492413	-0.960017940019862	-0.30541412079404
Panama	1981	95	-0.627120372752938	0.189642901835334	-0.62449234722795	-1.02563435842365	-0.271472436943072
Panama	1982	95	-0.597737481738181	0.187101416808536	-0.591195851231306	-0.979422055867753	-0.244648141201344
Panama	1983	95	-0.523085370282772	0.190589731766226	-0.512504052692779	-0.927481525873747	-0.189135972230931
Panama	1984	95	-0.29917124901958	0.151074740958388	-0.288778435614624	-0.614006735621619	-0.0200267152168257
Panama	1985	95	-0.21680430176386	0.117396625491699	-0.213964061799272	-0.45729416477723	0.00169311971828607
Panama	1986	95	-0.362596596755683	0.159020513150553	-0.352340734356346	-0.698737472954229	-0.0791816527618037
Panama	1987	95	-0.553755912516616	0.186030036722641	-0.549244764026522	-0.941811185593787	-0.211974208160977
Panama	1988	95	-0.982936979436913	0.166591025579538	-0.983991883996333	-1.30757320607023	-0.654885064973835
Panama	1989	95	-0.157062462079211	0.12492803955563	-0.154361979950159	-0.4230142715534	0.0769518585331681
Panama	1990	95	0.328934620893486	0.117713176132588	0.330603302203571	0.0879687623772652	0.551495480130822
Panama	1991	95	0.329697580083874	0.11493977149876	0.331451341178224	0.0988110247659631	0.548919410218773
Panama	1992	95	0.313495393230938	0.118960878051154	0.31420259066055	0.0731732112774496	0.544332867978447
Panama	1993	95	0.331120769219927	0.118564865600593	0.331760158677531	0.101266142623854	0.556686926117504
Panama	1994	95	0.639169242984334	0.145279303762809	0.633939005587096	0.370818410222809	0.945131421490663
Panama	1995	95	0.83399137472135	0.185896424965453	0.828646811633616	0.496469374020622	1.21400891942454
Panama	1996	95	0.836490538090652	0.184372756071464	0.832866558458724	0.496077760966256	1.20550498140057
Panama	1997	95	0.840049148849734	0.188022951139561	0.831779199645888	0.491754137066802	1.22278968095318
Panama	1998	95	0.897054044090577	0.192096806415424	0.88974030274654	0.548869993237794	1.28791983438899
Panama	1999	95	0.975380337446491	0.201653974109039	0.974009283314546	0.592738611349234	1.37762984435053
Panama	2000	95	0.853383720252757	0.165798902883598	0.851542484621998	0.544574029522485	1.18204524603689
Panama	2001	95	0.975182642148536	0.203408913308831	0.971196949098233	0.583817534389819	1.38866357603985
Panama	2002	95	0.976837178268392	0.1999044168273	0.972008004164581	0.600748988222744	1.39048129987342
Panama	2003	95	0.981086960323569	0.198624757072499	0.974236121849113	0.609925769686363	1.38259125418083
Panama	2004	95	0.976742506360542	0.203908726105461	0.976036237312492	0.576842356358444	1.37387286133216
Panama	2005	95	0.976615366542044	0.200464518976356	0.972836574717863	0.598915030068775	1.38372378121212
Panama	2006	95	0.994923419976114	0.172941885904748	0.99206421910389	0.656475766790586	1.33964450726202
Panama	2007	95	0.960677874441202	0.208172087805444	0.95915629715108	0.557059021349886	1.37177628340024
Panama	2008	95	0.994046895394086	0.172037216997086	0.991586394385804	0.66098343219153	1.33668955151045
Panama	2009	95	0.818281399742716	0.212584887155119	0.81961839046394	0.405022865798734	1.23546892423346
Panama	2010	95	0.907487480501669	0.177970058354481	0.905866976307931	0.569422229146831	1.25407164673233
Panama	2011	95	0.964683531421711	0.189652410134683	0.961319374261868	0.597031439069352	1.33488251593365
Panama	2012	95	0.962753670138281	0.188885938810848	0.963971634479931	0.591896657893918	1.33275320025948
Colombia	1946	100	0.16022409926891	0.13245093683926	0.160780689142138	-0.0977754875509441	0.415580853593505
Colombia	1947	100	0.16381078948564	0.133875820266407	0.163868031523597	-0.102752593505579	0.421209287192091
Colombia	1948	100	0.0548754433293633	0.128607436142153	0.052640208315651	-0.186957191868696	0.30389821453957
Colombia	1949	100	-0.339548948471247	0.155073883757007	-0.330520620829821	-0.664626266231036	-0.0532244472706558
Colombia	1950	100	-0.447966940792309	0.167161311817419	-0.437041929936579	-0.801501238045187	-0.146744212995836
Colombia	1951	100	-0.573540018944203	0.206954806540071	-0.562597230524863	-1.00254906438418	-0.205167286134268
Colombia	1952	100	-0.573460264048744	0.210907875875426	-0.563785139868277	-1.01714909386486	-0.192635495435521
Colombia	1953	100	-0.665968207367182	0.222173638076191	-0.65445003430656	-1.12725207674405	-0.266113273557154
Colombia	1954	100	-0.769940281628008	0.23699315761012	-0.76311104830929	-1.25599140997346	-0.333692846395382
Colombia	1955	100	-0.772522827741205	0.237605534946925	-0.763674904216986	-1.2516205045179	-0.339094438106238
Colombia	1956	100	-0.887280338626052	0.248998490042468	-0.882533497887679	-1.38986429786287	-0.419894826239392
Colombia	1957	100	-0.322632869973253	0.152881778951813	-0.31525201092946	-0.644698872148698	-0.041558607823264
Colombia	1958	100	0.116055096759399	0.129898483499807	0.116686500973683	-0.134384020426688	0.367768930030144
Colombia	1959	100	0.242679440845895	0.132557071924832	0.24356386122053	-0.0166571824370156	0.499188739366641
Colombia	1960	100	0.206134245166477	0.115264630364284	0.207316042597792	-0.0190770099960422	0.431970340903469
Colombia	1961	100	0.247002509048072	0.131150655232546	0.249973176233211	-0.0165354236707166	0.494690607628991
Colombia	1962	100	0.279346858536666	0.132327707561197	0.279912468736019	0.0181668329516824	0.532037266575694
Colombia	1963	100	0.283295879541177	0.129306453446872	0.286882404575969	0.0242817452361776	0.531149411006303
Colombia	1964	100	0.279068662158047	0.12816407569001	0.281538755295128	0.030753954086361	0.526655758469015
Colombia	1965	100	0.26333710148546	0.121973272957987	0.265754528349417	0.0152105387344827	0.491021931700426
Colombia	1966	100	0.246312761194272	0.132453527881677	0.247816086368162	-0.0177462573525954	0.504288281583017
Colombia	1967	100	0.243562850073712	0.132227398612833	0.24514622724649	-0.0153251018300963	0.503522481171096
Colombia	1968	100	0.241336159072012	0.132609718792805	0.243117456861529	-0.0168507416147577	0.495110678141622
Colombia	1969	100	0.24418327772714	0.130950000939133	0.246907097055258	-0.013026410149888	0.49872755170315
Colombia	1970	100	0.303828911539043	0.129724634321677	0.308700214896349	0.0419002205248812	0.540379205512251
Colombia	1971	100	0.305083509147794	0.130278008270043	0.306030794316108	0.0508269342550458	0.55827572623044
Colombia	1972	100	0.356291632469068	0.120187936336054	0.358368728553245	0.112816552292731	0.584941714937679
Colombia	1973	100	0.354598762734343	0.120630220313057	0.354540575974507	0.116531273217549	0.591796432242879
Colombia	1974	100	0.642215518302054	0.158563162579149	0.636098367652596	0.349382683126318	0.971376872282323
Colombia	1975	100	0.598387158691179	0.151936933553634	0.590279203143177	0.321910193939024	0.919296129223885
Colombia	1976	100	0.598408069529952	0.153843663573079	0.592225360877653	0.317658864366941	0.916896528844168
Colombia	1977	100	0.53642170086064	0.131546355836186	0.530664101918718	0.294099703717293	0.807854334670096
Colombia	1978	100	0.599615628982022	0.153867695481708	0.591186419843868	0.317936436105102	0.926637167207726
Colombia	1979	100	0.598405430891793	0.152923239852781	0.592525404111423	0.320243803227586	0.923765007987607
Colombia	1980	100	0.527007620911066	0.13236823902655	0.524641973802347	0.276244087007594	0.795361186155542
Colombia	1981	100	0.600987865369611	0.153865254928912	0.59131945576461	0.324428160358495	0.923458728982325
Colombia	1982	100	0.571058995571379	0.147564282527989	0.564372979727551	0.298990091462805	0.880424309904822
Colombia	1983	100	0.618130347410247	0.15968792341625	0.606605954847984	0.327377375028187	0.950143290185815
Colombia	1984	100	0.618577313845596	0.160727702932805	0.607400278261596	0.332242471504806	0.960079960159602
Colombia	1985	100	0.717953337332004	0.155793406621325	0.710053311914186	0.427111769684829	1.04004773342442
Colombia	1986	100	0.616872174663493	0.160066820317426	0.60915391519543	0.32791774955151	0.952738297849062
Colombia	1987	100	0.612905433663309	0.159927926048137	0.602935675447561	0.323126881063593	0.952235593370762
Colombia	1988	100	0.536252741512023	0.127911550423353	0.529296248926193	0.29222982987208	0.799250744388882
Colombia	1989	100	0.543641470068981	0.150015083897746	0.534088820301988	0.281188149079256	0.868448998252609
Colombia	1990	100	0.264035019636651	0.119133777130814	0.266139379239019	0.0277084959970237	0.496392759873483
Colombia	1991	100	0.293825565519862	0.120782379653628	0.296296071513221	0.0518328471051573	0.530766474448861
Colombia	1992	100	0.295670883647389	0.118615039786622	0.29683306716063	0.0573600676581152	0.528312522997679
Colombia	1993	100	0.293731483653357	0.120274728851193	0.294503765865171	0.0560844987305261	0.526669228161044
Colombia	1994	100	0.295854651525991	0.122145905982305	0.297316298363242	0.0507008553138159	0.53389785461896
Colombia	1995	100	0.22021491205476	0.119795458314114	0.222769103485201	-0.0183825222609578	0.453664812096502
Colombia	1996	100	0.221715993853891	0.119667747436753	0.22306791462903	-0.0144649664842513	0.455401602992963
Colombia	1997	100	0.21962808767759	0.122003754445549	0.220883444263825	-0.0199772048799655	0.449248408408458
Colombia	1998	100	0.26506457047888	0.119319380825776	0.265558016489097	0.0304012354199106	0.496342251974154
Colombia	1999	100	0.166131720305368	0.128116807567465	0.166931807945353	-0.0842141307526305	0.413324185707206
Colombia	2000	100	0.151899001304251	0.118569969633565	0.15075275181241	-0.077741387418108	0.391062176127095
Colombia	2001	100	0.168399589555353	0.128685808661389	0.169271100662404	-0.0753339333933512	0.415520120321725
Colombia	2002	100	0.163999594666746	0.12782316548385	0.166711441653195	-0.0869008620404645	0.40830037221966
Colombia	2003	100	0.166827581817708	0.127720439470697	0.167387576738584	-0.0861458996761115	0.413239091601505
Colombia	2004	100	0.16675890825859	0.125750027764627	0.167031380750688	-0.0758541106677221	0.415897924263472
Colombia	2005	100	0.216353193675859	0.126900396747271	0.218099091692041	-0.0312337469688288	0.465143970128316
Colombia	2006	100	0.29861653123428	0.121596299327822	0.300160911829935	0.063701744414112	0.534157882290085
Colombia	2007	100	0.238306402031289	0.136887652374267	0.241696008064196	-0.0312063108113772	0.500085294953564
Colombia	2008	100	0.368246772306694	0.163666313516113	0.367244768889297	0.0481183719983081	0.685087757511432
Colombia	2009	100	0.205138792777668	0.21073923980158	0.206853627470732	-0.196375358809954	0.618865408211391
Colombia	2010	100	0.335206730481319	0.172864841063574	0.334908487165741	-0.00259204597329434	0.674523861881152
Colombia	2011	100	0.397936443397902	0.182451645739202	0.397651374519333	0.0428558745927987	0.761811569970108
Colombia	2012	100	0.399852330808423	0.188421555479298	0.397496219316406	0.0341632100728637	0.770046359572033
Venezuela	1946	101	-0.0107069683850009	0.12750932073819	-0.0114094704279346	-0.254455585312009	0.243391968855099
Venezuela	1947	101	0.256509849038592	0.121045860839585	0.258837553434885	0.0201469678021406	0.493767699003877
Venezuela	1948	101	-0.345604180258425	0.155589481589509	-0.335103290615469	-0.676309388274903	-0.0565654780799047
Venezuela	1949	101	-0.80975725628063	0.244591136260894	-0.79977035403178	-1.31945304359161	-0.358415460985683
Venezuela	1950	101	-0.779881245119771	0.197485316653499	-0.774740803559036	-1.18051819884665	-0.410611681648117
Venezuela	1951	101	-0.809977639364555	0.245116928466745	-0.800640647660276	-1.3045482329877	-0.349418741777128
Venezuela	1952	101	-0.703260878574064	0.226119505123859	-0.691758542265782	-1.16464641100607	-0.294733918889755
Venezuela	1953	101	-0.604571586577945	0.215163241842458	-0.590683988797065	-1.06161918020006	-0.215264766903711
Venezuela	1954	101	-0.517731026599545	0.198999128563094	-0.509508933394758	-0.933509599888572	-0.161848893143982
Venezuela	1955	101	-0.632263749187727	0.189093413209432	-0.626236406941656	-1.0116943686924	-0.282960754840368
Venezuela	1956	101	-0.602728720365664	0.215708198756337	-0.593385379693148	-1.0595804486451	-0.215770863582586
Venezuela	1957	101	-0.697008128043183	0.227094378398935	-0.687219612036023	-1.1676518718096	-0.279403624959997
Venezuela	1958	101	0.271782084444265	0.114521332229233	0.269436397699188	0.048448811417642	0.499402884272054
Venezuela	1959	101	0.589617678914452	0.164695990712789	0.580484329748856	0.295268729807977	0.938221462145433
Venezuela	1960	101	0.541238426011048	0.138473006521275	0.533883820519078	0.29317799023589	0.828876510569459
Venezuela	1961	101	0.593292714702585	0.166823429304473	0.579941154679042	0.295761302047721	0.960658796305192
Venezuela	1962	101	0.587914916437407	0.166227311911448	0.57585339771553	0.298725393158789	0.944656636781551
Venezuela	1963	101	0.625400915133805	0.170468906683012	0.614449022782732	0.324048077341016	0.988448773535218
Venezuela	1964	101	0.634656568125271	0.175027859597111	0.621786823635139	0.3301831177213	1.01200306751966
Venezuela	1965	101	0.53918877877428	0.146045897691524	0.529868832011029	0.27314805207854	0.849030381179621
Venezuela	1966	101	0.630774590500046	0.167251685260889	0.618242030395769	0.332042738299356	0.998890107987153
Venezuela	1967	101	0.632259351021386	0.171307015165447	0.622616569299864	0.320031664631529	0.997168034410753
Venezuela	1968	101	0.669652915025288	0.17675927704587	0.658193570459269	0.352096476767218	1.0339538592433
Venezuela	1969	101	0.933956194930125	0.222979026029218	0.927737709060074	0.521948009373466	1.39309172139959
Venezuela	1970	101	0.802959060632185	0.202699962662394	0.794814508878745	0.438893240492067	1.21264942874453
Venezuela	1971	101	0.806931344857654	0.199841714943186	0.796203643353344	0.43884517515125	1.21765981020491
Venezuela	1972	101	0.878927571068638	0.188071083646661	0.875381857073167	0.526285627151704	1.24888779603934
Venezuela	1973	101	0.78675003232975	0.179859339500681	0.7839110677099	0.453346578865032	1.14754679086025
Venezuela	1974	101	0.785060604650691	0.177099750346448	0.778822797926734	0.458529527286941	1.14091620162566
Venezuela	1975	101	0.783488598798384	0.176296047811722	0.775743746371249	0.459703942210544	1.13172297416901
Venezuela	1976	101	0.856281744820625	0.186698038052644	0.849944734778674	0.515470829871808	1.24303042047854
Venezuela	1977	101	0.786568982633833	0.174282058087613	0.78183146821137	0.469833381522457	1.14069481230697
Venezuela	1978	101	0.905906996403535	0.189098542671216	0.903413955572902	0.547857400625573	1.28003107232139
Venezuela	1979	101	0.910096004052827	0.187537647217129	0.90786362637439	0.550980131026737	1.28297453095667
Venezuela	1980	101	0.806682073515569	0.16399177310391	0.802157782052752	0.494073741998768	1.13668658478225
Venezuela	1981	101	0.909296060549739	0.189847016330249	0.905748175137771	0.552795421847758	1.29436362520047
Venezuela	1982	101	0.904420804292742	0.186044046526484	0.898081534580926	0.553532812737466	1.27129405873718
Venezuela	1983	101	0.854382056457822	0.194730708124174	0.848722800036234	0.48997995291407	1.25047984195923
Venezuela	1984	101	0.85276211292731	0.194260208679929	0.849949271758751	0.4930518177981	1.24510119883664
Venezuela	1985	101	0.925011640880434	0.179372058730797	0.921506201011554	0.591045215481817	1.29298798321284
Venezuela	1986	101	0.854132175244782	0.196266550623268	0.850281768924187	0.484689566479066	1.25613821975872
Venezuela	1987	101	0.849291706048948	0.195784757706482	0.839738947525603	0.480400603229165	1.25937790252717
Venezuela	1988	101	0.887661845750943	0.185109085875737	0.874184883134318	0.554123023907753	1.27483810375385
Venezuela	1989	101	0.775624625469128	0.186354137847688	0.76779655716065	0.437417621620113	1.15360764123897
Venezuela	1990	101	0.80175064908804	0.179559150066276	0.795467057690877	0.467035719640428	1.16895489021851
Venezuela	1991	101	0.798194708717903	0.178232591513431	0.791835057673921	0.470982639069983	1.17516790588482
Venezuela	1992	101	0.645721008483802	0.158766901032724	0.637008884694926	0.364751581971601	0.982226152225227
Venezuela	1993	101	0.649128514609514	0.162233055634032	0.644301129200688	0.357994556698306	0.979890334496531
Venezuela	1994	101	0.648584072933453	0.163033731413892	0.638058403907056	0.359890506253706	0.998717954814957
Venezuela	1995	101	0.648638949578801	0.161307164554599	0.638991704333294	0.360108259368712	0.996615837754713
Venezuela	1996	101	0.684810618788698	0.165474369796701	0.676201804783659	0.387571819170561	1.03465880776329
Venezuela	1997	101	0.685279390931727	0.164285631706298	0.679735671704387	0.388329203670424	1.03483065201194
Venezuela	1998	101	0.644630696239876	0.161310744526517	0.636799169289664	0.357306295736396	0.982015281807461
Venezuela	1999	101	0.297445120445504	0.128786240369671	0.299961113393309	0.0389241705536262	0.548944363369831
Venezuela	2000	101	0.475284422127621	0.129359894128873	0.470752519040109	0.237695686150893	0.741303167042611
Venezuela	2001	101	0.463479541261013	0.136782096171801	0.458903791650429	0.210411196482084	0.747159473969791
Venezuela	2002	101	0.172306934131981	0.129968714368894	0.172492342545586	-0.0810935436656647	0.423779058140018
Venezuela	2003	101	0.279723416569733	0.127328331774042	0.281824850520741	0.0228852303174306	0.519743757502492
Venezuela	2004	101	0.220135586940892	0.128573266486118	0.220080042777046	-0.0319017472196518	0.47335865212979
Venezuela	2005	101	0.193829008645932	0.128823029896097	0.194796428455593	-0.0516466572381069	0.441168850200864
Venezuela	2006	101	0.199691821547784	0.121749125812029	0.2011696249707	-0.0446283282465128	0.434285549939678
Venezuela	2007	101	0.199439493667718	0.139158975315571	0.202354918964401	-0.0726280080164135	0.468263769334536
Venezuela	2008	101	0.236344239681141	0.153102463729283	0.235618092238902	-0.0542329331284203	0.535399208298158
Venezuela	2009	101	-0.104697213731156	0.208444443586946	-0.0985981225119914	-0.522777443085836	0.290284758088013
Venezuela	2010	101	-0.0448378180677077	0.168908966430398	-0.0480559396582386	-0.375150973481552	0.288057491540824
Venezuela	2011	101	-0.143408121056174	0.183398481843564	-0.142683579204824	-0.499273305952807	0.215862782149901
Venezuela	2012	101	-0.13738142435867	0.178534007552426	-0.137831824708193	-0.487304545575037	0.214222179674784
Guyana	1966	110	0.0729604770370194	0.219568308469255	0.0811084070787561	-0.371137820541461	0.489258584472535
Guyana	1967	110	0.315732086657642	0.190753616018263	0.313149498348773	-0.0561804079039403	0.686234977031345
Guyana	1968	110	0.241940665762567	0.19480951701973	0.243237048679484	-0.140919583405534	0.624232585242396
Guyana	1969	110	0.244497265074674	0.195588459949061	0.246361899076433	-0.1471324454914	0.629139337329262
Guyana	1970	110	0.238437571032685	0.193956187274479	0.237680270526524	-0.147465731142556	0.618815811958642
Guyana	1971	110	0.246509597759409	0.1963008985724	0.246050290300681	-0.149383755730385	0.62071646890486
Guyana	1972	110	0.364752671574683	0.171428240034927	0.364733487523249	0.0238188450305658	0.692277714570917
Guyana	1973	110	0.110873583351041	0.175004679523911	0.11120992205412	-0.225145296661016	0.444959346084546
Guyana	1974	110	-0.337943249038917	0.188481251854255	-0.336590911673583	-0.716705334275045	0.0312879289413348
Guyana	1975	110	0.0679231198108282	0.175631573924527	0.0683492468195619	-0.26882589500655	0.412778410423999
Guyana	1976	110	0.115828554963942	0.173750316794041	0.113613618871452	-0.224496903446192	0.449340128738639
Guyana	1977	110	0.109951167009766	0.172757220093906	0.10884896871703	-0.236024657369393	0.444421911655919
Guyana	1978	110	0.0525791392937716	0.175678206864171	0.0544503906591609	-0.304979845941137	0.392583146774892
Guyana	1979	110	0.00179822744185072	0.175978395848484	0.00173344123974531	-0.344683625534561	0.349682764971623
Guyana	1980	110	-0.154741842464556	0.164094657443485	-0.154115922707076	-0.487052293090574	0.163789643301095
Guyana	1981	110	-0.235798339091384	0.188564860667771	-0.237048632184659	-0.605014678649703	0.133174630298022
Guyana	1982	110	-0.231447261049664	0.185918671268223	-0.230667996075874	-0.594167206063703	0.127781448311887
Guyana	1983	110	-0.444996089457401	0.208004671688379	-0.441604516374818	-0.865572263133112	-0.0503248225484971
Guyana	1984	110	-0.447460612328409	0.206962565066752	-0.443034786413998	-0.859256309861413	-0.0545042068437182
Guyana	1985	110	-0.496878363090572	0.17323743292017	-0.494237033385607	-0.8559676569882	-0.16770704427115
Guyana	1986	110	-0.519260029328626	0.211213709041792	-0.518772887234373	-0.940724437884628	-0.117845074075543
Guyana	1987	110	-0.524874738951163	0.208679826521698	-0.524622242988626	-0.929346650282382	-0.121715561057295
Guyana	1988	110	-0.464747111601895	0.154676532471423	-0.464653444667197	-0.764805165310032	-0.17130116471355
Guyana	1989	110	-0.44548752156015	0.207097150187825	-0.439773759234182	-0.868572576849814	-0.0462419024514936
Guyana	1990	110	-0.450147091792006	0.2075680828406	-0.445855894458401	-0.863339645355718	-0.0497755479561272
Guyana	1991	110	-0.450872878530147	0.207655807752134	-0.456011908104653	-0.853615474352533	-0.0474468630057258
Guyana	1992	110	0.198939500514274	0.184843352271724	0.203928342251345	-0.165901446070828	0.553119788736845
Guyana	1993	110	0.314754371799423	0.184083142480069	0.312202367073362	-0.0426466654276062	0.674718600824537
Guyana	1994	110	0.310057763209867	0.178892561281151	0.310897203598688	-0.0415919595603222	0.655971268816285
Guyana	1995	110	0.30785872176536	0.177581398213053	0.310310512233902	-0.043781723195235	0.660739875876381
Guyana	1996	110	0.310030387247412	0.181716882090361	0.311816253772013	-0.0522151517821069	0.667597859006703
Guyana	1997	110	0.309118630086326	0.182669283580509	0.310728758677824	-0.0440244309192873	0.664024119281586
Guyana	1998	110	0.305860113367849	0.186379832244939	0.30626722414739	-0.0549130763021377	0.668638596690238
Guyana	1999	110	0.306643569587517	0.181976072337816	0.31014846312846	-0.0634648801297798	0.656750437806631
Guyana	2000	110	0.37118218405972	0.156640266310174	0.373115021159446	0.0516140970091763	0.679801841741477
Guyana	2001	110	0.361423070816724	0.182733667025121	0.367453241737012	0.00121752561421161	0.719668614954755
Guyana	2002	110	0.356088199259821	0.179694921850808	0.350772226036229	0.00536218151206139	0.711655084233386
Guyana	2003	110	0.358934758325502	0.177088197644558	0.358191026493519	0.000962927262588318	0.699502624306413
Guyana	2004	110	0.359549713444008	0.178580250510261	0.360240461528084	0.00910349041690458	0.707396559223854
Guyana	2005	110	0.253258999767292	0.183071953946139	0.2546873893501	-0.107905376945304	0.606603365108103
Guyana	2006	110	0.343437171889051	0.151714908732765	0.343355006623766	0.048805914498686	0.633615361347232
Guyana	2007	110	0.251554702806119	0.187540023719528	0.255982862096776	-0.126979478633512	0.602258956991662
Guyana	2008	110	0.345236169368734	0.152949529348372	0.34676638225642	0.0453962078609883	0.644381233284924
Guyana	2009	110	0.422393693837573	0.208482335232664	0.42371291740045	0.0114138213063226	0.822610604958894
Guyana	2010	110	0.470487608216721	0.172201715558582	0.468875556509111	0.137932061788901	0.806692917984785
Guyana	2011	110	0.455153500864748	0.185289146512038	0.455173081784658	0.0938220353550695	0.814550291084482
Guyana	2012	110	0.455565728601977	0.187296108047149	0.451900263609379	0.0933824181588914	0.829704011515837
Suriname	1975	115	0.534393453308883	0.188716448081525	0.529796428054784	0.17401866770656	0.916890854624153
Suriname	1976	115	0.535713172628835	0.185653195488431	0.534133861400963	0.176534125592753	0.900816977266513
Suriname	1977	115	0.532861132744479	0.188833882054291	0.531503271728916	0.175186353162516	0.917536513542268
Suriname	1978	115	0.532788069684768	0.18570367664548	0.531181535603369	0.170612732180182	0.898954137865384
Suriname	1979	115	0.532576148878994	0.187379571182693	0.533584105563746	0.167132358856564	0.894406507874406
Suriname	1980	115	-1.02822197815211	0.193526473341541	-1.02655401122736	-1.41410463920504	-0.657996449906943
Suriname	1981	115	-0.783697204804589	0.210910254482337	-0.778411746710495	-1.20254634716696	-0.372411473935974
Suriname	1982	115	-0.936034804249002	0.215508612366065	-0.937026035264723	-1.362435734222	-0.513435314790602
Suriname	1983	115	-0.860395439803991	0.232638585189274	-0.864172461059726	-1.3187327687443	-0.409067708358843
Suriname	1984	115	-0.87137089157367	0.23014476945309	-0.869909610032218	-1.31927174020175	-0.427036502895311
Suriname	1985	115	-0.791129481269922	0.181657969001465	-0.789577092634224	-1.14412737823244	-0.432992444021327
Suriname	1986	115	-0.760182751911219	0.230553933544413	-0.754135222168622	-1.23132335726687	-0.309526493638635
Suriname	1987	115	-0.178505890916703	0.193962621524089	-0.177536438628055	-0.563939033766585	0.199559749043238
Suriname	1988	115	0.256660694576354	0.144431670397931	0.255885890498786	-0.0209996378462831	0.539473077627373
Suriname	1989	115	0.124760191019663	0.185208585154566	0.12121173811076	-0.229516617645088	0.496538008473314
Suriname	1990	115	-0.225762317265739	0.198875867156602	-0.222903176757076	-0.622662139355083	0.1657885255038
Suriname	1991	115	0.261778193210366	0.188393677581165	0.254997003721697	-0.0921919850782453	0.646143596361134
Suriname	1992	115	0.365840745205354	0.192788120223801	0.364927567405181	-0.00669576276636671	0.75141931898522
Suriname	1993	115	0.368822336068993	0.193637705193886	0.365527805445762	-0.00329347272901217	0.762810361521536
Suriname	1994	115	0.364201458311796	0.192730873986475	0.363679185481526	-0.00784871067906201	0.750010411624047
Suriname	1995	115	0.364406676695047	0.19232992962179	0.362419275118926	0.0025369903219389	0.75004422652085
Suriname	1996	115	0.422799487998974	0.190877440515739	0.415861095073724	0.0640168422501615	0.809220378246106
Suriname	1997	115	0.424288952220924	0.189898488226656	0.422929877170993	0.0659947838078994	0.799139396775964
Suriname	1998	115	0.421084635288507	0.196527688086495	0.416220878719624	0.0318976344011203	0.816204290423972
Suriname	1999	115	0.423565289189969	0.194776959473787	0.422896302613741	0.0479064050489625	0.803520612066967
Suriname	2000	115	0.741553811204914	0.182758982872015	0.739668193615391	0.390251270573529	1.10771695613497
Suriname	2001	115	0.627974610744989	0.202082476313391	0.627368461117149	0.23498088574293	1.02697420728606
Suriname	2002	115	0.636358590645333	0.206628805800343	0.631913510161035	0.251435612349815	1.04674918344073
Suriname	2003	115	0.634852371918152	0.201528823823476	0.632587355141622	0.246084986699234	1.03174253355062
Suriname	2004	115	0.633965092225539	0.2016005636556	0.635608937784693	0.247176521479019	1.03251062600915
Suriname	2005	115	0.550614037415007	0.198724618337955	0.545564604667572	0.170117172804445	0.952662901091622
Suriname	2006	115	0.555118236252442	0.163103133802621	0.55266398502741	0.239486108516355	0.89019647922169
Suriname	2007	115	0.545255783838744	0.197444853742876	0.542992737677731	0.17167451551335	0.946988399146647
Suriname	2008	115	0.555649266144749	0.166002550427578	0.55546946076167	0.236728015167731	0.884600794824851
Suriname	2009	115	0.516980194499891	0.213722349947099	0.517041816473404	0.0985627100305783	0.936857902026751
Suriname	2010	115	0.579267775340034	0.173915406832802	0.580613577368728	0.230032799482718	0.914520382087467
Suriname	2011	115	0.478477970039265	0.188814121554362	0.480873587572683	0.1008922371797	0.849245112806878
Suriname	2012	115	0.481255151588323	0.186254052340233	0.482473252985256	0.114922805674376	0.842684517455596
Ecuador	1946	130	-0.26402149780861	0.150786209210549	-0.256678300560212	-0.579383513928131	0.00892081369384157
Ecuador	1947	130	-0.516724148214819	0.219250665411528	-0.500252308464717	-0.976158279161414	-0.13657620189897
Ecuador	1948	130	0.265039831479927	0.119312224536259	0.265352351157769	0.0307166140431122	0.49814654753176
Ecuador	1949	130	0.335401627991807	0.123562863468003	0.334093842170367	0.0947547328305138	0.57553168258789
Ecuador	1950	130	0.340761939238129	0.11715282940492	0.337734980724775	0.117511921053211	0.578882875764777
Ecuador	1951	130	0.336071826296566	0.122529021747432	0.332179999093896	0.103614278413058	0.582194904995009
Ecuador	1952	130	0.335219424171276	0.121803661646238	0.332686537679609	0.0998737660186152	0.581471554191388
Ecuador	1953	130	0.311111316441419	0.121593316421476	0.308899944065301	0.0761794126485773	0.55296587558012
Ecuador	1954	130	0.308576796634509	0.124117448233243	0.305859995250277	0.0736387151621054	0.558665055592106
Ecuador	1955	130	0.293547075049264	0.111649407427094	0.289947136659883	0.0771540952804149	0.513556592315463
Ecuador	1956	130	0.329229736771561	0.120478139120684	0.327989387681603	0.0984761075193726	0.563839297311191
Ecuador	1957	130	0.332700135340701	0.120465636372065	0.331768970375747	0.106226309704904	0.577019137095429
Ecuador	1958	130	0.332673607151084	0.121945431006863	0.331137471112792	0.0992808557983919	0.587620167476988
Ecuador	1959	130	0.333147675916548	0.121976763734348	0.329957728922287	0.104798475255999	0.579658927927224
Ecuador	1960	130	0.330086415725366	0.109590225471893	0.327867120499936	0.12416990393566	0.550248864699354
Ecuador	1961	130	0.0977841301327613	0.128817720072278	0.099265640163797	-0.151688785723939	0.342913066002842
Ecuador	1962	130	0.134843239762785	0.13146582391274	0.13400330838271	-0.119193353296655	0.392112168597948
Ecuador	1963	130	-0.429427676556448	0.169136088293803	-0.42037771352036	-0.784592301062359	-0.121518082597383
Ecuador	1964	130	-0.737849400141912	0.232361295574749	-0.731947350473358	-1.21472323529294	-0.311517092437664
Ecuador	1965	130	-0.664668176331921	0.190536683751014	-0.661213867902015	-1.05154851429123	-0.30820620350195
Ecuador	1966	130	-0.4808016368862	0.171804996275239	-0.473328249998184	-0.835774792704025	-0.164771734351771
Ecuador	1967	130	-0.487382163758571	0.173384235779148	-0.478553483158125	-0.846228441396489	-0.171863749824547
Ecuador	1968	130	-0.00545751268532017	0.126077886855235	-0.00688814873135117	-0.245828992445519	0.247475344344016
Ecuador	1969	130	0.0377551142888991	0.129605772391297	0.0347256340792331	-0.214985009126224	0.297772442868962
Ecuador	1970	130	-0.408825844368077	0.166073431240817	-0.404373708849149	-0.743642584847887	-0.101793714068298
Ecuador	1971	130	-0.605349405493869	0.220613952763685	-0.596442893600505	-1.06289751998363	-0.211284849806416
Ecuador	1972	130	-0.744083624855253	0.195505421853213	-0.740313027663592	-1.14304617965443	-0.379234153608954
Ecuador	1973	130	-0.737313211584347	0.198934435327631	-0.732707580199003	-1.12620258579949	-0.357014621846518
Ecuador	1974	130	-0.73788567231874	0.196634288797379	-0.731488331621005	-1.13166357993803	-0.362584513043987
Ecuador	1975	130	-0.738556306608438	0.198637972282177	-0.73513974057094	-1.13970764866042	-0.354554870436956
Ecuador	1976	130	-0.530459593286778	0.162099259133774	-0.526715180827045	-0.860872536669793	-0.217620667785462
Ecuador	1977	130	-0.523728838672016	0.15020633805505	-0.523331499280153	-0.817992343709671	-0.235879816554466
Ecuador	1978	130	-0.49158816816416	0.159534643122418	-0.488962906772965	-0.81979411174993	-0.189742270405321
Ecuador	1979	130	0.487974788074087	0.128928741764056	0.483123592695903	0.249290597908333	0.756845917389835
Ecuador	1980	130	0.528385104359062	0.126631878527263	0.523938398929467	0.293390068214222	0.785713276367111
Ecuador	1981	130	0.547371859025541	0.137704513884146	0.540434892476702	0.292092156085431	0.826848351486511
Ecuador	1982	130	0.547628818706923	0.137515285186094	0.542360670874936	0.287100288993366	0.840957547823162
Ecuador	1983	130	0.525322221753678	0.139627508442872	0.520769667715129	0.266113172833172	0.816814772356857
Ecuador	1984	130	0.514977050203666	0.137624506820353	0.51218621551474	0.257204368479967	0.79264206936569
Ecuador	1985	130	0.621791015795922	0.137680999637591	0.617968392737136	0.371489339957088	0.906343437200474
Ecuador	1986	130	0.658826342147348	0.168346203284471	0.648447939483093	0.356272229055677	1.00860282228889
Ecuador	1987	130	0.618113880924409	0.162695003021884	0.608146418581733	0.336223093391312	0.965440541614355
Ecuador	1988	130	0.773388231959934	0.165204749930038	0.76517588982218	0.475248326062497	1.11484360470618
Ecuador	1989	130	0.726810501601052	0.175100613799912	0.716868711404313	0.411753176153164	1.09153252718668
Ecuador	1990	130	0.750430872779317	0.175158567941886	0.742819448901434	0.433405255837325	1.1136421954994
Ecuador	1991	130	0.696874452086298	0.169805923180673	0.682702593459471	0.394601475362723	1.05638519823804
Ecuador	1992	130	0.69770108112312	0.166583609810965	0.689711204734418	0.391253377813453	1.03854965895929
Ecuador	1993	130	0.698942264216071	0.168419355630918	0.690458530694526	0.391787229103678	1.05273906494642
Ecuador	1994	130	0.69634084769656	0.164455984493006	0.686931123403674	0.408895922164465	1.0441994408531
Ecuador	1995	130	0.742678199921569	0.171509464809525	0.732637693117274	0.434217887731873	1.10442049736803
Ecuador	1996	130	0.701908590355079	0.167670174603242	0.694489811114906	0.395166362119851	1.04857644705955
Ecuador	1997	130	0.547318305876453	0.140041598691695	0.539882022103264	0.288785859498468	0.837693673664935
Ecuador	1998	130	0.696769893148748	0.165735016978305	0.685644236036261	0.395146043068374	1.04761527468472
Ecuador	1999	130	0.678011956033068	0.171210563978785	0.66974301216735	0.359750028300121	1.03778686626544
Ecuador	2000	130	0.21071862464672	0.118769269833628	0.212275027720329	-0.0247940122484754	0.440870863419327
Ecuador	2001	130	0.350913394189882	0.117445165264486	0.350085304981767	0.126118059650739	0.594892068623439
Ecuador	2002	130	0.470076826112019	0.133283934537527	0.465178718591175	0.223292430280661	0.758242542391328
Ecuador	2003	130	0.552088027347156	0.150769212811445	0.545728615028402	0.274675105627683	0.866999737542762
Ecuador	2004	130	0.320877836717428	0.125863520411682	0.323686377353694	0.0679939341956786	0.561319238835119
Ecuador	2005	130	0.264226551074791	0.12524218156558	0.262412601029697	0.0231330612595999	0.509529199144154
Ecuador	2006	130	0.295820913721848	0.119298234393336	0.297384389963779	0.0582620958822392	0.526184892050813
Ecuador	2007	130	0.28444205117313	0.13396824023314	0.284221450358652	0.0138784847145022	0.543518392405421
Ecuador	2008	130	0.34504272709256	0.160215155738546	0.344782550047434	0.0409759501117574	0.659893035649329
Ecuador	2009	130	0.368838739545686	0.211767418692259	0.364118550205536	-0.0434871127888528	0.768166496566494
Ecuador	2010	130	0.301687125187461	0.16740003833792	0.303231861435256	-0.03210615384003	0.630559739632948
Ecuador	2011	130	0.207551260623601	0.180615540186462	0.206892187196066	-0.151424595056556	0.564758110522725
Ecuador	2012	130	0.212465122462903	0.176648522766269	0.21163000498642	-0.131008887637023	0.556090327592099
Peru	1946	135	0.0453346760164049	0.180688382551922	0.044720091049808	-0.311493863328044	0.397468000004166
Peru	1947	135	0.0514621638939605	0.179222448915165	0.0525877876388179	-0.299489258349057	0.398180513643151
Peru	1948	135	-0.528693940126419	0.181785184876219	-0.520746436194764	-0.903809381749161	-0.19743371073564
Peru	1949	135	-0.950684066212456	0.254260260025565	-0.946394896325643	-1.46192863503142	-0.476966224327519
Peru	1950	135	-0.61005394865074	0.188139346615621	-0.601746176068793	-0.99702176429269	-0.263414868431108
Peru	1951	135	-0.567890001747974	0.20974882720942	-0.558879581135589	-1.02275659108979	-0.192517400896754
Peru	1952	135	-0.578272502720783	0.213064303717023	-0.566507896336316	-1.01638455411831	-0.190794324013139
Peru	1953	135	-0.572501457570564	0.211868220651123	-0.559928329845445	-1.01264797583977	-0.19685995216804
Peru	1954	135	-0.575248143261987	0.216363691984873	-0.561830407798345	-1.01790602257235	-0.18462304526926
Peru	1955	135	-0.397193143990539	0.163962000911122	-0.391211496982612	-0.742919162783584	-0.102127964132937
Peru	1956	135	0.0725615807260353	0.129958712688473	0.071072466888024	-0.178886790859519	0.330256943376391
Peru	1957	135	0.159871915696578	0.13008174466211	0.160493242704577	-0.089624669273872	0.409331844510175
Peru	1958	135	0.162394229116011	0.130860729491528	0.162441804633836	-0.0913546738392923	0.420295640604874
Peru	1959	135	0.161421196230718	0.130258260174663	0.15990890570863	-0.0939934524066009	0.412694520040671
Peru	1960	135	0.107857587515564	0.116374378993488	0.108119613596016	-0.117011325474203	0.336178924411443
Peru	1961	135	0.19962401909431	0.132636690553335	0.202008074949013	-0.06114291158188	0.45621989090257
Peru	1962	135	-0.531780884656757	0.178415063712512	-0.527635668240758	-0.89506460506316	-0.201639115343627
Peru	1963	135	0.314236016834194	0.121435055142106	0.313468465663902	0.0829905415251287	0.55843571428462
Peru	1964	135	0.389632274978813	0.128764807492938	0.38604042316175	0.146740559955357	0.650943675268834
Peru	1965	135	0.3919242605399	0.119966589326078	0.389715056704994	0.16306346280938	0.633820456863006
Peru	1966	135	0.393263770153154	0.126225321595296	0.390851135918324	0.150222999979747	0.651483962055676
Peru	1967	135	0.389569801524679	0.127850763448028	0.383139065813249	0.149025227038597	0.654857388280675
Peru	1968	135	-0.598646591312449	0.189506242845657	-0.595469345891881	-0.972353497255966	-0.240566717369559
Peru	1969	135	-1.13233900861391	0.286065533594256	-1.12618584002458	-1.71732083204962	-0.585179741640219
Peru	1970	135	-1.13610645202169	0.278603139569962	-1.1315113841522	-1.68752905375546	-0.607502179168418
Peru	1971	135	-1.13348127647879	0.279059552023589	-1.12244880824629	-1.69700370760135	-0.612426029221905
Peru	1972	135	-0.963113048526434	0.214263473240352	-0.962711471735121	-1.38881625237161	-0.544812459174561
Peru	1973	135	-0.962881428106622	0.211849102158419	-0.964098112342386	-1.38137696048575	-0.548517373664298
Peru	1974	135	-0.960069872181971	0.210874232309911	-0.949818552047279	-1.38729663473844	-0.558482903697335
Peru	1975	135	-0.786386943754974	0.206191007585713	-0.781122609306627	-1.19772288587122	-0.395612744795942
Peru	1976	135	-0.79221064227664	0.205872106740516	-0.790098655080064	-1.20171895022418	-0.404866130935664
Peru	1977	135	-0.828094265102384	0.198839338606198	-0.824490769210896	-1.23179623281984	-0.449043878903786
Peru	1978	135	-0.325443668799392	0.140191891197814	-0.318571144159281	-0.618183914421378	-0.0715530474333705
Peru	1979	135	-0.383266216248844	0.145779821882323	-0.375673648805156	-0.680565205504914	-0.114783121850355
Peru	1980	135	0.395789700176151	0.114349629007126	0.393795891650792	0.176853047953069	0.625265165203327
Peru	1981	135	0.538675397788787	0.143279178530125	0.531239447626261	0.27210972410984	0.832189725696299
Peru	1982	135	0.542178475831936	0.143265993211261	0.53287765747413	0.282264725977705	0.854708243245452
Peru	1983	135	0.339940129375474	0.12432192596694	0.33963906512535	0.0957767104081971	0.584942962631626
Peru	1984	135	0.339274889266312	0.12479613663948	0.338405093766691	0.0856001361918782	0.581251652876358
Peru	1985	135	0.620174582514134	0.138159096976149	0.614610797099908	0.368196448693642	0.905528200577464
Peru	1986	135	0.613603098233407	0.161131674705567	0.605416022543099	0.319742992866161	0.953374945888928
Peru	1987	135	0.61019720057662	0.159667324011911	0.598816243276803	0.324794822807857	0.952737648765628
Peru	1988	135	0.304454802945276	0.111309719493157	0.305394594597017	0.0841506681519024	0.516115606319146
Peru	1989	135	0.338008899157761	0.127008336131875	0.339548026595532	0.0777593235373643	0.581823130879754
Peru	1990	135	0.27744490224919	0.119510608987626	0.277845703665057	0.0459890565344864	0.508578080428992
Peru	1991	135	0.256470640680651	0.120229969865204	0.256537734388368	0.0201766935732137	0.491156710911649
Peru	1992	135	-0.380789191218113	0.149825793729706	-0.376586235596727	-0.702098234596927	-0.10897585670971
Peru	1993	135	-0.244058966897261	0.135279568636587	-0.236076297942569	-0.530973243726534	0.00180070699709253
Peru	1994	135	-0.213806054217773	0.129198196880586	-0.207075537572725	-0.483747491715073	0.024455811937549
Peru	1995	135	0.033782316163631	0.116330025392664	0.0331356613426327	-0.191297002174313	0.261907117857764
Peru	1996	135	0.0714470362135968	0.11762528775018	0.0713784164327724	-0.160920849581253	0.301847047340037
Peru	1997	135	0.0349324793317366	0.120084235246519	0.0319386689308224	-0.194720272174294	0.272794383189594
Peru	1998	135	0.0346705327250276	0.118835221666351	0.0334811047386621	-0.192746058886091	0.271160053842224
Peru	1999	135	0.0279685251338998	0.127894557942468	0.0281098918996744	-0.216284090518663	0.28241805652513
Peru	2000	135	-0.00610872224119254	0.118315104904082	-0.0085741174577711	-0.241170984487694	0.228514307493557
Peru	2001	135	0.783097923595788	0.184427072643422	0.773720611674098	0.441528603541452	1.15860075589332
Peru	2002	135	0.732269346189058	0.177064585597734	0.72410217587428	0.415429533569804	1.09722661048162
Peru	2003	135	0.72591830041685	0.1811347842857	0.717695397199402	0.402442306862034	1.11352796750937
Peru	2004	135	0.723622713454414	0.179286557593298	0.717554375477937	0.39842102211901	1.09266978942347
Peru	2005	135	0.726371329147537	0.176069750107008	0.716827899055411	0.409910103122038	1.09337135184062
Peru	2006	135	0.697415797434084	0.154401015488934	0.690716394136419	0.413182527805564	1.01674552590288
Peru	2007	135	0.748976581600432	0.185380227018361	0.739585636914376	0.413408626717072	1.13268928142108
Peru	2008	135	0.675096513422414	0.167878919155552	0.674457767697699	0.345135918945098	0.998924903483685
Peru	2009	135	0.712551073610759	0.211934748185739	0.708851847686926	0.30228073676203	1.12692549207732
Peru	2010	135	0.661122444817111	0.17213056886488	0.662280522248801	0.323948265342138	0.991536387106967
Peru	2011	135	0.625773394970124	0.187173477091712	0.629336518659356	0.265308666493955	0.990784559612994
Peru	2012	135	0.626356717176408	0.188447079998789	0.626911958111305	0.260140768355788	0.995252306721098
Brazil	1946	140	0.441814454917611	0.202624417626664	0.435997395945378	0.0623621045267363	0.852443791685153
Brazil	1947	140	0.346558155140226	0.195188587676087	0.34307282629519	-0.0274000184812973	0.73864941215401
Brazil	1948	140	0.322203755572237	0.179558810072978	0.318403998050125	-0.0189291300053318	0.680361143790191
Brazil	1949	140	0.325049691684304	0.181847371313097	0.320086423208555	-0.0149232627164013	0.701602652012381
Brazil	1950	140	0.343774647253291	0.159920473077418	0.338752796783381	0.0381759202828551	0.668676436867336
Brazil	1951	140	0.321643971979874	0.179839415675833	0.316527023538294	-0.0234581392474625	0.687984368765334
Brazil	1952	140	0.323167612240498	0.17875686925466	0.321039848776923	-0.0170844251829578	0.675421434759784
Brazil	1953	140	0.32912607934981	0.182301577665701	0.326999747435602	-0.0206557674977404	0.692003682031788
Brazil	1954	140	0.322337467690927	0.179374929262577	0.320390243055361	-0.0300915871025755	0.673488820136183
Brazil	1955	140	0.381330852196418	0.166803772843278	0.378799619123064	0.0601997532890014	0.722892105367234
Brazil	1956	140	0.375175518596274	0.179867417447319	0.371475626444896	0.0252595828699463	0.74332913050712
Brazil	1957	140	0.460399357837233	0.19078390397986	0.45494808770098	0.101527900272482	0.847468073606128
Brazil	1958	140	0.505866764969366	0.195302585874111	0.5012688587485	0.144339926604776	0.904899990835974
Brazil	1959	140	0.506382791995114	0.198911345026528	0.501055480064987	0.12929068008421	0.905015582672479
Brazil	1960	140	0.440195290346027	0.157702549569603	0.435894493890439	0.144266516188411	0.761307721837117
Brazil	1961	140	0.460290500903751	0.191755907721161	0.460721737974137	0.0980110416492828	0.846770981524372
Brazil	1962	140	0.46249429619623	0.1919832573222	0.45900386071712	0.0933104835021965	0.856438731823163
Brazil	1963	140	0.320891661829898	0.18136473720595	0.319506159444631	-0.0323066321777163	0.692815646168394
Brazil	1964	140	-0.808987241082212	0.250431223282323	-0.799264028662944	-1.31719473405991	-0.336461089486899
Brazil	1965	140	-0.928560890913577	0.214803506253943	-0.926578974980462	-1.3631371815252	-0.523536251580035
Brazil	1966	140	-0.993157117251813	0.257581896187477	-0.990732320095109	-1.49965777405692	-0.499388229981025
Brazil	1967	140	-0.995767140001006	0.260662038619554	-0.991875469250614	-1.51813986852554	-0.497823615981354
Brazil	1968	140	-1.45482245420634	0.290505944159704	-1.44865616217585	-2.04522383825635	-0.894608126847488
Brazil	1969	140	-1.26610003065178	0.266191601543704	-1.26584730858143	-1.78937295738607	-0.751655400195822
Brazil	1970	140	-1.0014825337466	0.261600267705712	-1.00088265920544	-1.52395250749486	-0.513604981905663
Brazil	1971	140	-0.992883042830315	0.255887694962914	-0.990165427775968	-1.50208656731753	-0.503171186773953
Brazil	1972	140	-0.806809277087249	0.205569681500813	-0.803449447578541	-1.21954909861486	-0.411862232275365
Brazil	1973	140	-0.803962388877592	0.204282174222949	-0.802403856349103	-1.20532234085547	-0.40768287923518
Brazil	1974	140	-0.235844684797323	0.158103323867734	-0.234448631842849	-0.549525149877495	0.0726974461897289
Brazil	1975	140	-0.276189582211833	0.157849265508608	-0.275810936075753	-0.582896377514468	0.0296142112452021
Brazil	1976	140	-0.274361550278107	0.159673114582421	-0.273224248016246	-0.594279794268488	0.0347028318393675
Brazil	1977	140	-0.341214800824079	0.150077540138964	-0.342816642992927	-0.637546223835329	-0.0563543879727662
Brazil	1978	140	-0.237757053089488	0.159784886788065	-0.23657026038718	-0.547453851456467	0.0735197467966576
Brazil	1979	140	-0.243321346717965	0.156320243641696	-0.241862679646767	-0.558310207077073	0.0549934951513409
Brazil	1980	140	-0.326219058070137	0.147150912137159	-0.324919182554859	-0.614135891301367	-0.0319156008350511
Brazil	1981	140	-0.242217475368563	0.167247532248012	-0.240691688438381	-0.579924340631797	0.0809142460581932
Brazil	1982	140	-0.22274902166969	0.165110042581675	-0.221998910846384	-0.546858790135473	0.100876007304791
Brazil	1983	140	-0.18532658736562	0.165080623213598	-0.184965126776891	-0.515412505564109	0.135244902194367
Brazil	1984	140	-0.189045606228628	0.164805931255658	-0.186404163933699	-0.512557429439727	0.133894042888756
Brazil	1985	140	0.350446176036204	0.14382691724924	0.350536526509651	0.0727248055011576	0.634206084570432
Brazil	1986	140	0.458873333525955	0.18182792470126	0.454374679168477	0.117991157080274	0.82599318491601
Brazil	1987	140	0.455577472036705	0.18114663876019	0.451792655358713	0.107419537928669	0.818478200137484
Brazil	1988	140	0.459703918223416	0.140485750499752	0.457090199176823	0.187905770699562	0.73251845497142
Brazil	1989	140	0.745849405352163	0.197414594236714	0.7397104390575	0.371187669600975	1.14347791947769
Brazil	1990	140	0.708922937748497	0.179527426069122	0.705047875509812	0.372146749993062	1.07074818313704
Brazil	1991	140	0.71126761882273	0.183884146440363	0.706425085762223	0.35762635984734	1.08018525939023
Brazil	1992	140	0.71085696622305	0.186263035285182	0.702901450856825	0.373126691285303	1.08821568741282
Brazil	1993	140	0.660136613783569	0.181295465131512	0.655435381277895	0.317607076316124	1.01793063053701
Brazil	1994	140	0.709533590932972	0.183051268985419	0.705033912877185	0.367198226742443	1.07816967076624
Brazil	1995	140	0.706808096368533	0.182932969551692	0.700016780264332	0.364581081245834	1.08398745157261
Brazil	1996	140	0.706805791247079	0.180819351757569	0.705766777569323	0.365131753666891	1.07046582565729
Brazil	1997	140	0.660852376016675	0.178376677140562	0.655601172324495	0.326435027752386	1.02503811157038
Brazil	1998	140	0.657249813861568	0.180387385873668	0.651541482015297	0.317243898259869	1.02327037078975
Brazil	1999	140	0.62781609565857	0.186484574771652	0.621287229800502	0.271467401619732	1.00207120488175
Brazil	2000	140	0.765708448813093	0.177430510236356	0.764293369760782	0.428856450882915	1.11537269712266
Brazil	2001	140	0.68248956131707	0.191428572219848	0.680093212360965	0.322463628221195	1.07269680983525
Brazil	2002	140	0.737966322359345	0.19564328430343	0.735529771865664	0.361554579603234	1.12507508492772
Brazil	2003	140	0.688128716037564	0.192320525420064	0.682676041897843	0.313118729399386	1.06390351897289
Brazil	2004	140	0.681797274600096	0.190904995838952	0.677670844170111	0.315219897426282	1.05717259651903
Brazil	2005	140	0.808038448085816	0.200479524314282	0.801734973844834	0.423579213679813	1.21027271645396
Brazil	2006	140	0.870327283213933	0.17085664431356	0.870449511630952	0.539875630255053	1.20829609313145
Brazil	2007	140	0.780765992693086	0.209148173143437	0.778848997257189	0.381296463676371	1.20007437729775
Brazil	2008	140	0.871540308573589	0.170491601644076	0.871610269961878	0.529436859730709	1.20702028118319
Brazil	2009	140	0.764656212328754	0.209920449944985	0.762297667103025	0.347711462796084	1.17953794377768
Brazil	2010	140	0.919775547985012	0.17445409949986	0.920895457720933	0.584865162502432	1.26147306852954
Brazil	2011	140	0.816190608323025	0.189548390520633	0.815761860934105	0.436228228402368	1.19007088505513
Brazil	2012	140	0.817655159596733	0.187413484436219	0.816656754823994	0.454882812471675	1.18999524382311
Bolivia	1946	145	-0.641040720680124	0.258390926272241	-0.631348195286021	-1.1873462438923	-0.169436571867166
Bolivia	1947	145	-0.660216250235771	0.250984429782689	-0.63950181339921	-1.19718462154362	-0.220770006551027
Bolivia	1948	145	-0.572906544895531	0.208856333041347	-0.558550000298839	-1.01019564442184	-0.20358499626397
Bolivia	1949	145	-0.575192389295518	0.212440323136709	-0.562494879494026	-1.02844956646671	-0.193073308076704
Bolivia	1950	145	-0.444016740582099	0.165142066781477	-0.436945835980877	-0.786305540462247	-0.140828812357581
Bolivia	1951	145	-0.879475911095888	0.250556739938096	-0.875702730980487	-1.38809428064469	-0.408081248960041
Bolivia	1952	145	-0.47929944780532	0.173128857289625	-0.471683790024283	-0.843196471040713	-0.160936904511053
Bolivia	1953	145	-0.479246526318007	0.174374757488454	-0.472434113741708	-0.834828279733684	-0.155568852816655
Bolivia	1954	145	-0.477856530507744	0.177912861862112	-0.469902276287441	-0.84629763350261	-0.142806403092028
Bolivia	1955	145	-0.483521433654858	0.158301920822643	-0.478331298003186	-0.79437585001146	-0.186278341452221
Bolivia	1956	145	-0.0384907389158029	0.128380182346872	-0.039029952063188	-0.287489439724062	0.217402638056731
Bolivia	1957	145	-0.0412469873484432	0.124800998223651	-0.0443622113400511	-0.276993685565592	0.210549861522743
Bolivia	1958	145	-0.0395448926151265	0.124439672307814	-0.0427999509102523	-0.275201934713843	0.211863014628521
Bolivia	1959	145	-0.0384632098568179	0.123167317004309	-0.0424951693934805	-0.274336054074886	0.210670429645651
Bolivia	1960	145	-0.00166424437354541	0.114444319365636	-0.00205119765757466	-0.218769195945353	0.221390529870865
Bolivia	1961	145	-0.0363692429718396	0.124711261505535	-0.0372411276901522	-0.276270145965516	0.214739802211502
Bolivia	1962	145	-0.0375866565351371	0.126031579361013	-0.0410668438843708	-0.281842162370698	0.21673858493784
Bolivia	1963	145	-0.0137841720126374	0.128875726610208	-0.0181631741811478	-0.256427362736517	0.243482397225997
Bolivia	1964	145	-0.475687721891379	0.176763933675244	-0.466393853354725	-0.846937354418482	-0.149330591416295
Bolivia	1965	145	-0.807383941299619	0.203868311115595	-0.804905153659386	-1.21702194933306	-0.420263110122023
Bolivia	1966	145	-0.42528441080057	0.178237776428444	-0.415491990649681	-0.803003098892282	-0.108113968330029
Bolivia	1967	145	-0.424649895249919	0.177097564235341	-0.41565640013828	-0.797520962225032	-0.105324596866636
Bolivia	1968	145	-0.425848921596293	0.176448868291584	-0.413643903759254	-0.794556799268155	-0.108003659564336
Bolivia	1969	145	-0.841523616206864	0.247450971364307	-0.834049306671446	-1.34117706023864	-0.381399193088222
Bolivia	1970	145	-0.885234797770099	0.251388978399736	-0.884086032488953	-1.38639628275272	-0.414194832665853
Bolivia	1971	145	-1.1293332224057	0.281599015903629	-1.12404324533164	-1.69709703525886	-0.600899543144076
Bolivia	1972	145	-0.726333344166798	0.197896930580707	-0.72415089542445	-1.11787442415993	-0.354887608959399
Bolivia	1973	145	-0.727132881273509	0.199496402193488	-0.721144751638219	-1.12870957069976	-0.356677374283029
Bolivia	1974	145	-0.866692266949282	0.210785184613261	-0.865966004908496	-1.27970067707272	-0.455220533916791
Bolivia	1975	145	-0.876259996262868	0.216732174612408	-0.873109252881944	-1.30735524172372	-0.461905476089999
Bolivia	1976	145	-0.791695865455079	0.207528694861075	-0.78238128902488	-1.20827595295152	-0.404850474090722
Bolivia	1977	145	-0.817532586173305	0.198673339453139	-0.812619741341914	-1.21642301438608	-0.44262640921985
Bolivia	1978	145	-0.600139614765588	0.187044907734628	-0.595091862474456	-0.977110732277832	-0.2537717318264
Bolivia	1979	145	0.0190003717538255	0.121802681609087	0.017475450839773	-0.213621416548881	0.261145189285984
Bolivia	1980	145	-1.25813118644383	0.196469709420912	-1.25842387218992	-1.64107730340252	-0.866565699473001
Bolivia	1981	145	-0.965248951582642	0.212961353636334	-0.963426809711623	-1.38981709856797	-0.555334611172693
Bolivia	1982	145	0.34473079095797	0.116790291311869	0.342327150773465	0.12143556904859	0.582690860546548
Bolivia	1983	145	0.652984399621835	0.169177670739808	0.641010166938264	0.34988246796795	1.01370384712948
Bolivia	1984	145	0.659757135873069	0.170004316183709	0.650780485025515	0.363817751640106	1.02347757833026
Bolivia	1985	145	0.557929702877767	0.12588929707718	0.552051199804217	0.321028826442591	0.820096391313639
Bolivia	1986	145	0.716181549748153	0.176531185552474	0.706293371564155	0.399569178505993	1.08769345668105
Bolivia	1987	145	0.715105965886522	0.177789089773288	0.707981757566778	0.392501834774223	1.08126592796177
Bolivia	1988	145	0.592689678911789	0.133011030292165	0.586241316620872	0.347175150740021	0.867762547816822
Bolivia	1989	145	0.713450029067249	0.17637866181436	0.699556009629417	0.404446078966903	1.08161809243846
Bolivia	1990	145	0.742428157066201	0.175241935430034	0.730841813048903	0.4211113762649	1.1045064218112
Bolivia	1991	145	0.741681903884664	0.171837936528502	0.733436091736506	0.426601830671552	1.1095221604488
Bolivia	1992	145	0.743316649217418	0.173542951303477	0.734781559369265	0.421309466803438	1.10380045485431
Bolivia	1993	145	0.743926735127966	0.175602339320979	0.736024566532955	0.430851956022331	1.11127247756119
Bolivia	1994	145	0.744203908004387	0.174359805796663	0.733216759291336	0.433733639188222	1.10736305835087
Bolivia	1995	145	0.69835736639929	0.165899440189001	0.686951669078675	0.40476428754233	1.05767279805163
Bolivia	1996	145	0.7435347942028	0.172488140928997	0.738014466764592	0.423939287111846	1.10680498443086
Bolivia	1997	145	0.847462364379613	0.189258159515649	0.840691068081072	0.502133336103533	1.23795304593478
Bolivia	1998	145	0.849081387441929	0.185700161265937	0.839619902185687	0.510338585450565	1.23075460946245
Bolivia	1999	145	0.83887121865585	0.190554533805625	0.834910287693064	0.480066323524143	1.22519281962436
Bolivia	2000	145	0.692695065289676	0.150558713900019	0.68937160030525	0.412075875707777	0.995495885396273
Bolivia	2001	145	0.840642508471395	0.19327966082288	0.837823967546296	0.483351764941849	1.22554695256011
Bolivia	2002	145	0.779104340541153	0.18346439865351	0.772259154154745	0.439694269003892	1.15512972069561
Bolivia	2003	145	0.553770685016997	0.14498705031471	0.546082015101747	0.285686006481027	0.855584279667818
Bolivia	2004	145	0.585360864504679	0.147253501692355	0.574708895126386	0.320885452101083	0.890101917073393
Bolivia	2005	145	0.490682380093285	0.13681293929104	0.48370955533885	0.234957475614171	0.771633149285073
Bolivia	2006	145	0.488794337801695	0.12943457188118	0.487098595899794	0.241512458281776	0.748447512798091
Bolivia	2007	145	0.549757421483334	0.161236698665937	0.540696283497053	0.251720474864356	0.889492478756532
Bolivia	2008	145	0.537485856979069	0.167891333466527	0.536562995288241	0.213885659846119	0.864676916543326
Bolivia	2009	145	0.475289729518505	0.210560459324469	0.471266013894366	0.0712466456565961	0.88664518260597
Bolivia	2010	145	0.323862823167064	0.163000521221173	0.322182211975145	0.00243618461899436	0.647753461398927
Bolivia	2011	145	0.2885524504534	0.181193680700279	0.290422427450966	-0.0592313600565562	0.640970073861209
Bolivia	2012	145	0.284258799449178	0.18226101133009	0.283824094023731	-0.086614537392619	0.641517344324925
Paraguay	1946	150	-1.28840566049373	0.318803624155695	-1.28142126686039	-1.90594841035773	-0.681891350209644
Paraguay	1947	150	-0.646701587367055	0.258447068281614	-0.634580829406383	-1.19162513908007	-0.16948058564402
Paraguay	1948	150	-0.766174631425987	0.23836786090775	-0.757815997782323	-1.24584740562183	-0.322679370030407
Paraguay	1949	150	-0.764950750195336	0.241951302206826	-0.755677082663098	-1.26052780517555	-0.312570070808179
Paraguay	1950	150	-0.686108373734818	0.19497488554977	-0.683392321703854	-1.08110101671055	-0.312303870103915
Paraguay	1951	150	-0.771521188156722	0.241919308353939	-0.766364825468413	-1.2637876588524	-0.320892942823393
Paraguay	1952	150	-0.767306775464726	0.238184881725356	-0.757779555124631	-1.25510879650387	-0.322015889688037
Paraguay	1953	150	-0.766258453650589	0.240411957699914	-0.762211109111014	-1.25475206108692	-0.317455344120111
Paraguay	1954	150	-1.27311047619378	0.266804285814755	-1.26957471333498	-1.79362353924117	-0.750993507490122
Paraguay	1955	150	-0.996541521209532	0.210623932180591	-0.989575432465307	-1.41723760657007	-0.603844237568439
Paraguay	1956	150	-1.2694570597698	0.273347338553416	-1.2667063944034	-1.81363404002101	-0.733168375032484
Paraguay	1957	150	-1.27682282437351	0.266422141382541	-1.27465017926045	-1.80091953400125	-0.772598338126816
Paraguay	1958	150	-1.13784601694604	0.267567426748348	-1.13411883576009	-1.67529879390938	-0.629770130981477
Paraguay	1959	150	-1.13177824630097	0.268687620283713	-1.1273517069054	-1.66875816081812	-0.626594222585563
Paraguay	1960	150	-1.00959414808857	0.205852671572437	-1.00600427921581	-1.42708141001613	-0.612360344858354
Paraguay	1961	150	-1.14065746983055	0.268190255995814	-1.13651746257829	-1.67483611782288	-0.636971525412683
Paraguay	1962	150	-1.13738866630391	0.26796541816377	-1.13647554004075	-1.67049320847588	-0.610465664508554
Paraguay	1963	150	-0.995541286978839	0.258670440567331	-0.989331716243012	-1.50970217378741	-0.514189010945868
Paraguay	1964	150	-1.00102366572151	0.257585849375093	-0.995764634126166	-1.511130607369	-0.507335372463693
Paraguay	1965	150	-0.828329831065897	0.205152539199185	-0.82478322294122	-1.22830085920985	-0.432475810243931
Paraguay	1966	150	-0.991605598023365	0.258163759862825	-0.988302434485861	-1.51494607519059	-0.506450543761447
Paraguay	1967	150	-0.87988199570548	0.245853697972774	-0.870344907149982	-1.38080178320011	-0.421301041136327
Paraguay	1968	150	-0.661955534307175	0.213433064115344	-0.651202434821417	-1.08821631882383	-0.264569458956433
Paraguay	1969	150	-0.667018471743899	0.215107240541789	-0.661126190807663	-1.11268042309746	-0.263840706517216
Paraguay	1970	150	-0.667553765586101	0.211969427182164	-0.663669880368001	-1.0928332772888	-0.260699083761473
Paraguay	1971	150	-0.668838578047193	0.214634020198136	-0.664862240860208	-1.09439365958431	-0.259329099901247
Paraguay	1972	150	-0.554401636095077	0.180695582886067	-0.54969475666049	-0.922117188872994	-0.203244534214772
Paraguay	1973	150	-0.550252542632567	0.178905851637139	-0.549285911884938	-0.898400496902705	-0.206410967622875
Paraguay	1974	150	-0.553328398720235	0.178354820668664	-0.553322586295785	-0.913959078056348	-0.206166182007127
Paraguay	1975	150	-0.551288154572263	0.181534961808569	-0.548784610937964	-0.918914585263272	-0.204581594925758
Paraguay	1976	150	-0.610236337678125	0.184671059282395	-0.608664346523538	-0.98563675978227	-0.252396930579817
Paraguay	1977	150	-0.653476968903341	0.177563326545103	-0.651995256263687	-1.00546634062758	-0.308813723431414
Paraguay	1978	150	-0.735822637587974	0.199436077184362	-0.733510410054341	-1.12662710429994	-0.353392109686868
Paraguay	1979	150	-0.735548337696465	0.196181224367918	-0.732746685497301	-1.12342270902652	-0.353345549596879
Paraguay	1980	150	-0.739279055106492	0.173151385548718	-0.733443113170938	-1.088146988293	-0.413234708542905
Paraguay	1981	150	-0.739662999431684	0.194996885125385	-0.73613495193603	-1.1233536852317	-0.36644217351206
Paraguay	1982	150	-0.736804223719302	0.202663254272029	-0.733860802329573	-1.13935090854098	-0.345654748586974
Paraguay	1983	150	-0.835416208599175	0.224862192593067	-0.827600811638464	-1.28748528907495	-0.400008004482431
Paraguay	1984	150	-0.833757146483098	0.221232133997941	-0.826869513721951	-1.28516519401764	-0.414175042620013
Paraguay	1985	150	-0.798178250620005	0.170660791639145	-0.794301536786982	-1.14600957944893	-0.47140355497338
Paraguay	1986	150	-0.934041468024486	0.226717957845953	-0.933285560752795	-1.39174731495546	-0.504331797600335
Paraguay	1987	150	-0.930403518475297	0.227814577326284	-0.924560310669108	-1.39013239220832	-0.505994133088565
Paraguay	1988	150	-0.868574629360278	0.166205590601185	-0.86628086837276	-1.2009903014198	-0.545652235513892
Paraguay	1989	150	0.124268835580687	0.126481833160683	0.125420847308979	-0.118157014936634	0.376249806055585
Paraguay	1990	150	0.132507270605018	0.118137652858359	0.133986152236795	-0.0988096796208007	0.36033948927857
Paraguay	1991	150	0.154726144083588	0.118940275432337	0.154414559673629	-0.0786140782635711	0.385796344505531
Paraguay	1992	150	0.21822854532225	0.118724238857537	0.220049697371662	-0.0195199707053772	0.446376653209351
Paraguay	1993	150	0.306064211871179	0.118666375227017	0.306781433005558	0.0667239789067988	0.531248151789659
Paraguay	1994	150	0.286951768659398	0.119280940343828	0.288423155969957	0.0501090855326075	0.521341472069551
Paraguay	1995	150	0.281599646226482	0.11961430980325	0.283549880670364	0.0419001915481753	0.512762892233877
Paraguay	1996	150	0.282270478378747	0.118059681115553	0.282371747533688	0.0537165221519796	0.520304539306473
Paraguay	1997	150	0.283094009022473	0.118311786606861	0.282565822880109	0.0471014921681852	0.515897545316617
Paraguay	1998	150	0.318250362526569	0.119440015966677	0.319276028387919	0.0825525934305193	0.546527432657728
Paraguay	1999	150	0.132123106023153	0.12979566783881	0.131828221016982	-0.122224378937568	0.388124215163116
Paraguay	2000	150	0.383352098710463	0.118469622913572	0.384500324158534	0.149212273022187	0.607777313795249
Paraguay	2001	150	0.295078202611878	0.126012234773571	0.298963285952704	0.0423632886734391	0.532986931986281
Paraguay	2002	150	0.29773815235235	0.125409413877923	0.301518156405393	0.0453510752072626	0.541329928991183
Paraguay	2003	150	0.369461656396856	0.125865655233041	0.372489275202133	0.121373710471045	0.610361693491317
Paraguay	2004	150	0.370323350365075	0.124907096282664	0.371281964033735	0.125007892370454	0.617667417546311
Paraguay	2005	150	0.370315055978005	0.123626036324175	0.373211638658223	0.123560726042142	0.607758987413348
Paraguay	2006	150	0.369338000521597	0.119488160559371	0.371867947913195	0.137011727567898	0.596877970639463
Paraguay	2007	150	0.326167935695998	0.133271968887176	0.327732055891133	0.0567481035833221	0.584692085597861
Paraguay	2008	150	0.532969388590712	0.165791584111865	0.531268753346918	0.207179572950219	0.862154961103629
Paraguay	2009	150	0.485486681775632	0.213985031096313	0.484856678611591	0.0715867066278128	0.908393214810016
Paraguay	2010	150	0.517285531780555	0.173570636303019	0.516398195685285	0.181136067651014	0.864468636911932
Paraguay	2011	150	0.507443471680953	0.191922751911343	0.507866094865901	0.136928050472228	0.887602900377414
Paraguay	2012	150	0.51101973432523	0.186748622387503	0.5127220126913	0.145274480710116	0.875138925741222
Chile	1946	155	0.116861206013827	0.17806165875018	0.11383663311657	-0.229382966970493	0.462965925362202
Chile	1947	155	0.114241290538221	0.178842673710132	0.116301514751478	-0.226579255090925	0.466979688886944
Chile	1948	155	0.126496559484038	0.167037812347652	0.123926719167786	-0.200938624194474	0.460705369828768
Chile	1949	155	0.118765776822744	0.166110873946434	0.12133609322341	-0.208008010955462	0.444253196836297
Chile	1950	155	0.174415315420933	0.157981307279233	0.171373099170364	-0.127994333034519	0.487290345837811
Chile	1951	155	0.121883407212909	0.164089357197025	0.119463769489245	-0.192181477038972	0.448190220986511
Chile	1952	155	0.185694268705028	0.171034691419157	0.187087618472244	-0.138202187196514	0.522610405091165
Chile	1953	155	0.257130458393151	0.174000854568084	0.253207259014629	-0.0790887219893374	0.614555058933673
Chile	1954	155	0.257346089831932	0.176329338703811	0.251618661662775	-0.0753112038257341	0.611227846243596
Chile	1955	155	0.342848312662309	0.161508915856156	0.338117813201158	0.0318839309767767	0.66495230309419
Chile	1956	155	0.410391453181967	0.18912351425245	0.406927731492262	0.0468706892514912	0.794614645097622
Chile	1957	155	0.330590708510957	0.182189236269075	0.329289143560497	-0.0141730448262933	0.708385227809053
Chile	1958	155	0.376866260841852	0.185587219215347	0.374122746122011	0.024215797860119	0.749604250975174
Chile	1959	155	0.45699934802963	0.194093401318742	0.454360443333913	0.0930320994749	0.845194580408238
Chile	1960	155	0.483819598527555	0.160635262863198	0.478039902364356	0.174948790304367	0.803468442148946
Chile	1961	155	0.459872882121962	0.194130958871351	0.452140228725965	0.0920798104335651	0.861078605159226
Chile	1962	155	0.458281833638109	0.191558394025774	0.455528122538805	0.0970409954533171	0.851412183201704
Chile	1963	155	0.463465426265281	0.191102553745209	0.457360302699956	0.10278985432202	0.849998030031381
Chile	1964	155	0.504516472423615	0.195825188067347	0.498572794062682	0.137603336036914	0.90488772550091
Chile	1965	155	0.591012399701836	0.182976208820995	0.582927883018014	0.252253683325223	0.961482503682282
Chile	1966	155	0.500348529672679	0.192476739082126	0.498431384567029	0.133304006652495	0.890297492301073
Chile	1967	155	0.501959133561653	0.195964355979362	0.499299276292158	0.122992868040807	0.903913831184537
Chile	1968	155	0.503146327392958	0.197326183937685	0.498421922938799	0.131012505895252	0.893528581630358
Chile	1969	155	0.501366972069442	0.195954692580676	0.497216724797124	0.139083638904489	0.913943241561064
Chile	1970	155	0.700497676846847	0.207081670159603	0.69522136534624	0.309305088560185	1.11757830447631
Chile	1971	155	0.707032935333862	0.209051940683649	0.696502315992913	0.321346304412814	1.13425228434886
Chile	1972	155	0.787552402763936	0.185336367077775	0.783775101076144	0.428544550762296	1.161504434829
Chile	1973	155	-0.501859498537635	0.16090284263496	-0.498105244068868	-0.822879229874888	-0.198140969576542
Chile	1974	155	-0.958835667262664	0.210270156486747	-0.954822193141549	-1.37628436225099	-0.558796716114043
Chile	1975	155	-0.965618192030849	0.209714241491987	-0.966850914261933	-1.37566393345719	-0.556010926282544
Chile	1976	155	-0.96090947910716	0.213950077382406	-0.960701893786806	-1.38605827400061	-0.546057524296251
Chile	1977	155	-0.97961197237864	0.209945179555627	-0.976597186861438	-1.40147844431119	-0.578772336624355
Chile	1978	155	-0.967687037684701	0.216795501449065	-0.963839567196746	-1.40443916635083	-0.560040826146186
Chile	1979	155	-0.874243379425639	0.211275747388382	-0.875955912944957	-1.29159316906954	-0.464651494678574
Chile	1980	155	-1.18134901710237	0.196531131845505	-1.17940770834865	-1.56554596820737	-0.805825395379173
Chile	1981	155	-0.966152318046412	0.219061633727859	-0.961821789505368	-1.40108027227653	-0.549860059548648
Chile	1982	155	-0.961631817084846	0.21409176155926	-0.953143823437656	-1.39097742557239	-0.557320625553992
Chile	1983	155	-0.692996742131621	0.210674840452864	-0.684267690820768	-1.12273784810345	-0.300752296224342
Chile	1984	155	-0.693736874913692	0.211827380234861	-0.687271642201424	-1.13146306299145	-0.291202630866559
Chile	1985	155	-0.646716709656224	0.162203947461571	-0.643672067803633	-0.97529504288542	-0.343987319424905
Chile	1986	155	-0.697779485473768	0.214429309874606	-0.690412766877143	-1.13960049065122	-0.300119350041116
Chile	1987	155	-0.698911106399898	0.211298419993828	-0.689976093567785	-1.12962531606059	-0.304503747182875
Chile	1988	155	-0.536986887164192	0.149585849914866	-0.53675851238355	-0.838747234103581	-0.244208458660775
Chile	1989	155	-0.0161679602986162	0.114349294071646	-0.0151307918946409	-0.242667207479562	0.203749010471223
Chile	1990	155	0.64620306043553	0.152420094563013	0.637561199091931	0.36911469488379	0.966645744610725
Chile	1991	155	0.64769435348169	0.151091921811341	0.640909894538596	0.371649480268646	0.956901358307643
Chile	1992	155	0.645633206196155	0.146799854426302	0.638514346782517	0.380113548978035	0.952715915180815
Chile	1993	155	0.644012815339475	0.153865805475248	0.634378618024043	0.366015832306189	0.961395863356853
Chile	1994	155	0.645992431523142	0.152196735351067	0.639233276459813	0.366333870596314	0.959328642663333
Chile	1995	155	0.640604416675736	0.150302358880836	0.63457092479837	0.364347086113627	0.953364091440381
Chile	1996	155	0.643837168379729	0.15139211552477	0.636985351464479	0.358914064167631	0.960529433686655
Chile	1997	155	0.646805485171023	0.151366794825919	0.640418694073909	0.369893440925965	0.963445192723092
Chile	1998	155	0.605801111870497	0.14589791629392	0.599351666443764	0.342153901309579	0.91020646106055
Chile	1999	155	0.628137426363514	0.155310984234119	0.620646254152843	0.347993232719059	0.950435794762537
Chile	2000	155	0.743419030068718	0.155815951024067	0.740403665173715	0.457789010079878	1.05957880171358
Chile	2001	155	0.672780403736797	0.159650405039498	0.669046163063691	0.378918619307519	0.999664466377541
Chile	2002	155	0.735641705517511	0.170147792322151	0.732777335715659	0.417312320501258	1.07428576244513
Chile	2003	155	0.814682996684905	0.174627229237393	0.808741922064693	0.488037385383928	1.17018775412009
Chile	2004	155	0.813295854220189	0.177668348212173	0.807623555708364	0.493443296007605	1.17906758037517
Chile	2005	155	0.817191776896994	0.17637765417673	0.811559283326252	0.491173275011274	1.17610970045037
Chile	2006	155	1.12924414749657	0.192175955964972	1.12807303233383	0.758894504039295	1.5048455488712
Chile	2007	155	1.18405678888031	0.263293204549285	1.17395297484302	0.702233121891503	1.72873818094455
Chile	2008	155	1.13099022869052	0.192027617309209	1.13031696495757	0.760302122624539	1.51669986270456
Chile	2009	155	1.18029947009997	0.262280237460106	1.17171856194832	0.680382308966066	1.71227723642919
Chile	2010	155	1.18487650806102	0.198303476869253	1.18356712728209	0.804558754835943	1.57591318364275
Chile	2011	155	1.25807851318821	0.224138918570396	1.25268397673727	0.834770201048994	1.71811693763118
Chile	2012	155	1.261314752133	0.223068017515679	1.25655252093781	0.841899244625264	1.7080839301934
Argentina	1946	160	-0.0451637799357916	0.128367330017871	-0.0475203150485815	-0.294410892458515	0.209480806231617
Argentina	1947	160	-0.0689953626756306	0.125982509869754	-0.0716319891746091	-0.304518106907802	0.187810740625329
Argentina	1948	160	-0.0554776529634973	0.120767624814532	-0.059226592193743	-0.288117067160708	0.184402024408393
Argentina	1949	160	-0.0780934795232648	0.121245729392965	-0.0810264454993822	-0.316114282110718	0.165582312747843
Argentina	1950	160	-0.148453556777876	0.111630850820507	-0.149355885894131	-0.365431814572085	0.0744940361293314
Argentina	1951	160	-0.26112830868845	0.137538627367939	-0.257159263669904	-0.544804166937343	-0.00237341769785694
Argentina	1952	160	-0.261172764197588	0.135993926866922	-0.257549373294786	-0.53247154641932	-0.00853189568279464
Argentina	1953	160	-0.228848256969705	0.131942692023024	-0.225240806811091	-0.498772801593123	0.0215468522610387
Argentina	1954	160	-0.263347554005482	0.134445428381533	-0.258446959674267	-0.535480919026455	-0.0148299480102805
Argentina	1955	160	-0.571767732276748	0.163771426459469	-0.570791450218737	-0.900661394758869	-0.264038840211265
Argentina	1956	160	-0.806804753871205	0.236448784056203	-0.805466439677333	-1.28143010925485	-0.361973783159064
Argentina	1957	160	-0.737928408902613	0.234383435370518	-0.727498990024844	-1.21589401647068	-0.307968945308846
Argentina	1958	160	0.145355533862795	0.128675112197539	0.143691792461628	-0.0964328251576206	0.397110840494381
Argentina	1959	160	0.143403376126786	0.129188889563583	0.143558937531804	-0.10496669764989	0.393457563597914
Argentina	1960	160	0.0450153947725045	0.11451096556788	0.0433061354577764	-0.170739530745666	0.269791192179073
Argentina	1961	160	0.146371855391089	0.12961561881955	0.14503547827752	-0.0994092303050658	0.400222939277407
Argentina	1962	160	-0.424136517969505	0.166822637957148	-0.414564335651475	-0.762418178125477	-0.119285646527888
Argentina	1963	160	0.174532703135636	0.131708094649021	0.174485351445194	-0.0768239951365298	0.429631847226049
Argentina	1964	160	0.170547681634664	0.128707400805214	0.171890819612113	-0.0786925721172091	0.419084768671999
Argentina	1965	160	0.137564963024362	0.123879721923143	0.139036059417805	-0.105931098411431	0.377922258145147
Argentina	1966	160	-1.46337589909611	0.292666793809238	-1.46048820556534	-2.0518154256812	-0.893152479331897
Argentina	1967	160	-1.45968426120052	0.291773707450305	-1.45185624052637	-2.03591748767884	-0.89887203360433
Argentina	1968	160	-1.45937457274609	0.291049615776294	-1.45918263740916	-2.03693910456281	-0.901157505033677
Argentina	1969	160	-1.46017383371195	0.289619503862801	-1.45920480401373	-2.02126977041507	-0.901137460892997
Argentina	1970	160	-1.46643686096796	0.293560253522688	-1.45999588843454	-2.06953293701674	-0.910054746294414
Argentina	1971	160	-1.27285059554029	0.268992479208296	-1.27052219364369	-1.80602109737588	-0.75912753819914
Argentina	1972	160	-0.901062761537491	0.210928862870488	-0.900412455942389	-1.31988798697053	-0.498446314781898
Argentina	1973	160	0.472834135854874	0.12752955191049	0.470734566802064	0.229244142276648	0.736244690118769
Argentina	1974	160	0.422481429128495	0.124638618867092	0.419065364472417	0.188261825528837	0.677432410957665
Argentina	1975	160	0.237877518890377	0.12104832071223	0.239104163493815	0.000913040368641091	0.466176751757356
Argentina	1976	160	-1.05934933318024	0.217520429449965	-1.05914056588698	-1.49014087561878	-0.634527753534171
Argentina	1977	160	-1.1620189051585	0.212439291183871	-1.1599739173726	-1.58805143163783	-0.764003975518907
Argentina	1978	160	-1.05915962015381	0.21382767573082	-1.05419581989429	-1.48228251567422	-0.647142467750676
Argentina	1979	160	-1.1633064309717	0.225006195540884	-1.15866812804051	-1.61059197000283	-0.731632601243935
Argentina	1980	160	-1.3363634461403	0.198035258144108	-1.33086447776407	-1.73581624264891	-0.954672658675763
Argentina	1981	160	-1.07459948362891	0.21473579492186	-1.06874676361302	-1.51225314521512	-0.668273265183371
Argentina	1982	160	-0.740762072595934	0.169186912977908	-0.740151043463191	-1.08035411250584	-0.408348223407842
Argentina	1983	160	0.477272287441574	0.132597793883559	0.471490964092712	0.230636354101599	0.755126279875145
Argentina	1984	160	0.811278787897798	0.189616223825591	0.800336742145497	0.470271020793276	1.20912632098509
Argentina	1985	160	0.88823131458322	0.175652529799128	0.881989927852601	0.568803813424861	1.25608454209513
Argentina	1986	160	0.888938533374348	0.197150014656766	0.885610769919721	0.523698684224971	1.28228026391679
Argentina	1987	160	0.890530980401371	0.199356596653104	0.888917701479705	0.520252035269789	1.29924350486184
Argentina	1988	160	0.920854326442428	0.187437746349463	0.919871439911693	0.568527580916493	1.29523259587712
Argentina	1989	160	0.826715709195945	0.191206399446246	0.820700056255053	0.472172279304167	1.21952572237182
Argentina	1990	160	0.7755962035962	0.177766636343263	0.768286907429772	0.448651300093044	1.14281790882195
Argentina	1991	160	0.773408494836991	0.179361817371676	0.762855417177755	0.454992045671341	1.14935901540336
Argentina	1992	160	0.716022635712182	0.172802118363273	0.703763364661119	0.407998260823881	1.07533797103343
Argentina	1993	160	0.719757948663008	0.170187213168796	0.708191258519392	0.408527641519788	1.07695591569148
Argentina	1994	160	0.721565372700827	0.170088249742079	0.715584228153456	0.414177886874722	1.08569932040368
Argentina	1995	160	0.718200145558925	0.169710422023688	0.711002660689201	0.414043677601752	1.07332887487864
Argentina	1996	160	0.725659330290116	0.171164508077219	0.714786572072744	0.421062356364024	1.08297611704273
Argentina	1997	160	0.719005529463336	0.168429886508911	0.709407791481566	0.412181675093785	1.0713872316077
Argentina	1998	160	0.676045102281741	0.163715682806595	0.668920114189589	0.377969439966122	1.01837474110269
Argentina	1999	160	0.757368813879318	0.180947712685609	0.751436990229125	0.428664775744213	1.13525378464095
Argentina	2000	160	0.952542873205517	0.184859401175823	0.946176197805527	0.607832859081967	1.33683653548196
Argentina	2001	160	0.583834196421878	0.150185329327511	0.574768860787196	0.303754964033454	0.893491041593996
Argentina	2002	160	0.7094779456065	0.176631007692991	0.699807684797876	0.394650356634902	1.08569860729183
Argentina	2003	160	0.97257340829387	0.199312584862259	0.969726977478982	0.589360235801522	1.3770716926324
Argentina	2004	160	0.967763138225689	0.199572643283062	0.963934868690031	0.583191765544258	1.37679193539151
Argentina	2005	160	0.975295849129056	0.203067470277537	0.973319089641608	0.589772267297966	1.37847349947512
Argentina	2006	160	0.828529157663562	0.16830703188471	0.827074216725229	0.505858788923078	1.16236417081076
Argentina	2007	160	0.742382788564249	0.186882501256607	0.733370751929943	0.399179708769457	1.12901424641931
Argentina	2008	160	0.670517515428653	0.16694013980241	0.669247121068801	0.340169890273895	0.995210422093674
Argentina	2009	160	0.7011530797353	0.211894134451085	0.698578681731161	0.282152135926949	1.11358765251528
Argentina	2010	160	0.66007195781788	0.172762002893539	0.658828627198294	0.319380719102091	1.00314392151344
Argentina	2011	160	0.622669900365587	0.188481988781308	0.626386511889572	0.251560362974655	0.985116214892044
Argentina	2012	160	0.619134964763161	0.187326678441315	0.614732642555795	0.253759848792852	0.999819401828136
Uruguay	1946	165	0.346527755518214	0.197215048769049	0.343350167440429	-0.0276651280607007	0.736190004336706
Uruguay	1947	165	0.352081371110876	0.19751809769249	0.345311155556945	-0.0115366394457257	0.756257312555267
Uruguay	1948	165	0.405199947755012	0.18853979636948	0.399627154511918	0.0547712768334015	0.78448110430733
Uruguay	1949	165	0.403687743019395	0.185580641689574	0.402876218412582	0.0472320551750955	0.772122203291683
Uruguay	1950	165	0.55942592394779	0.178318208675707	0.552942647742183	0.234082898014519	0.921808619554963
Uruguay	1951	165	0.460768808954926	0.19282603075562	0.453833746946278	0.0971564872684684	0.860419834412728
Uruguay	1952	165	0.68702183782591	0.212299110267284	0.681469260035865	0.288313440227981	1.12507250854983
Uruguay	1953	165	0.685393369999093	0.213797436950706	0.680642537013509	0.287401473394826	1.115542171406
Uruguay	1954	165	0.688711296082672	0.214616081546304	0.681604160101397	0.28542865821487	1.12942672975898
Uruguay	1955	165	0.764831098653829	0.200160282860422	0.760432007229487	0.389267594290692	1.1611998255321
Uruguay	1956	165	0.68572732387557	0.211962382090308	0.679070419975849	0.284860895501378	1.11721752165896
Uruguay	1957	165	0.685469513867893	0.214243225980855	0.680330239097416	0.287187796980982	1.1289517022784
Uruguay	1958	165	0.753000709879963	0.215140770881536	0.74972598710971	0.347212028648892	1.18835902207709
Uruguay	1959	165	0.756971951870778	0.213517412658655	0.755181393694877	0.359282834559993	1.19136430198481
Uruguay	1960	165	0.846866855375389	0.199698541795309	0.838948128259128	0.473562244165779	1.25972648411224
Uruguay	1961	165	0.908964038137288	0.22317239395363	0.905328778959706	0.483964199028227	1.36066559965235
Uruguay	1962	165	0.979090292973093	0.229747461538251	0.977358116065072	0.533691406454147	1.42670472599565
Uruguay	1963	165	0.912199680167134	0.220863077406999	0.910224364969313	0.496640455709551	1.35290080953136
Uruguay	1964	165	0.909035144978934	0.226190184069081	0.908383798751675	0.479780561580294	1.35712594468622
Uruguay	1965	165	0.826176983895148	0.204073079542159	0.817968709991596	0.450928929583705	1.25193019180087
Uruguay	1966	165	0.824689320720096	0.221559035433292	0.81940815697644	0.409583304362995	1.27478535204916
Uruguay	1967	165	0.911960770757867	0.222064801136265	0.910682174191934	0.492329699975025	1.35456011148503
Uruguay	1968	165	0.756878614081823	0.217435790305022	0.752452630860533	0.346730473369433	1.18968497506174
Uruguay	1969	165	0.910702309089394	0.225729756859116	0.906942936155262	0.482499477008551	1.35861900702259
Uruguay	1970	165	0.912622398878725	0.223833644060236	0.907878237389576	0.484394884953085	1.35335327842306
Uruguay	1971	165	0.890089754209502	0.224888483939507	0.883867049192903	0.460943905305106	1.33862354574926
Uruguay	1972	165	0.523618297878959	0.170107430386709	0.521567551610976	0.200154904217281	0.86326579342273
Uruguay	1973	165	-0.90383170167166	0.20690623632141	-0.900128718312444	-1.3153359128	-0.507421567024277
Uruguay	1974	165	-0.901211428889576	0.206653730255274	-0.900744432421049	-1.30985012046117	-0.501947100494708
Uruguay	1975	165	-0.898523868352099	0.206741675103554	-0.893841315799732	-1.30030128117626	-0.493673068723378
Uruguay	1976	165	-1.05931171762189	0.215322474051412	-1.05823667041491	-1.48553842823563	-0.641567382444545
Uruguay	1977	165	-1.07774730022798	0.207855388711926	-1.07350131826693	-1.48695714416723	-0.676452500896443
Uruguay	1978	165	-0.907089308720795	0.233358312347396	-0.904359786766175	-1.37022965373484	-0.460543502327723
Uruguay	1979	165	-0.905184280870425	0.233572828387009	-0.902162315919727	-1.3784911021727	-0.463875695937622
Uruguay	1980	165	-0.875224832629965	0.19639055160776	-0.871723766191839	-1.26334186370799	-0.493201317364825
Uruguay	1981	165	-0.713384969389945	0.215394300186025	-0.705234782948899	-1.1586396297295	-0.319644568597354
Uruguay	1982	165	-0.488297131268523	0.16447458921023	-0.48360473425398	-0.824703263825685	-0.18946332248855
Uruguay	1983	165	-0.443152527203797	0.162282553565209	-0.438093381817915	-0.773208699563728	-0.146070934121853
Uruguay	1984	165	-0.184139616450736	0.127303787996391	-0.17866179981813	-0.444599681788659	0.0480669779669436
Uruguay	1985	165	0.883533247189722	0.164239031876883	0.878412647972959	0.571487799764152	1.21881831950409
Uruguay	1986	165	1.04142243534138	0.208616738968007	1.04118392683292	0.639345380220151	1.45793765929335
Uruguay	1987	165	1.04111065484473	0.209221239398909	1.04001847199751	0.636684005570877	1.45624303778581
Uruguay	1988	165	1.06042195540222	0.202387263376113	1.0531994320612	0.681523774368166	1.47046350213097
Uruguay	1989	165	1.40303065091088	0.262874908348434	1.39720862834844	0.909562572472138	1.9236908176418
Uruguay	1990	165	1.40952219983518	0.260610920956068	1.40066257959459	0.923357369973339	1.93451479720448
Uruguay	1991	165	1.40657642001884	0.25349507548516	1.39727453986133	0.927441686326911	1.93622121332933
Uruguay	1992	165	1.40664315516314	0.254336731415037	1.39648679039013	0.928627542136136	1.92584070222458
Uruguay	1993	165	1.26108748182833	0.242920687890253	1.25120313075466	0.791754539394138	1.74917811402426
Uruguay	1994	165	1.27013411260472	0.243650508052289	1.26250772067115	0.819829823855711	1.7703104173946
Uruguay	1995	165	1.2670322862204	0.244062180818181	1.25762997550155	0.81784309727532	1.76428351754191
Uruguay	1996	165	1.40838524725162	0.257851927518852	1.40132131526276	0.913922671001416	1.92234307721314
Uruguay	1997	165	1.4141157883235	0.257626493973183	1.40523601096714	0.936372560762986	1.93598016174334
Uruguay	1998	165	1.4098330277197	0.260268172700301	1.39980063869005	0.932579595909623	1.93763934089492
Uruguay	1999	165	1.25325094739652	0.240428513904165	1.24786030507336	0.80263872217481	1.73400674703535
Uruguay	2000	165	1.10369186302793	0.194829366077615	1.09874468067004	0.741897933786686	1.49803034125083
Uruguay	2001	165	1.55681795270713	0.312103274025471	1.54008346034564	0.995617975657639	2.22837030475297
Uruguay	2002	165	1.56009430135962	0.312976462814129	1.53821934809486	1.00972765219485	2.23904352379093
Uruguay	2003	165	1.56550499291528	0.3121661119062	1.54969994590839	0.992043123893623	2.23016540497382
Uruguay	2004	165	1.55748465136542	0.307285053713154	1.5404006613974	1.00489279901269	2.22870530694924
Uruguay	2005	165	1.55697996991698	0.309218742304308	1.53781396462457	0.98697394921201	2.21516310510421
Uruguay	2006	165	1.30898368840715	0.202590093698449	1.30767000178508	0.918292995847075	1.70861804033932
Uruguay	2007	165	1.56147650733707	0.307805040980205	1.54753742759613	0.989877529210024	2.20397840441197
Uruguay	2008	165	1.56068144832291	0.217478675931189	1.55585192378419	1.15225629548486	1.99954888951664
Uruguay	2009	165	1.56343990673083	0.318390306859393	1.54722200792517	0.981257391699692	2.24314332563884
Uruguay	2010	165	1.56239652512736	0.217710877662936	1.55876165944451	1.15141955665016	1.99961031826511
Uruguay	2011	165	1.56751905750365	0.246820388848512	1.56384943395101	1.10955884627026	2.05872385270829
Uruguay	2012	165	1.56877575302781	0.250386018441254	1.56010757919946	1.1105857054452	2.08859230621235
United Kingdom	1946	200	1.0980528527168	0.294988556659111	1.08106121639791	0.551509003411141	1.70490418929315
United Kingdom	1947	200	1.09195023180141	0.296874274326831	1.07527628621705	0.553512789622421	1.72498183654565
United Kingdom	1948	200	1.04126238984188	0.261711178295682	1.02767437117179	0.557641721640286	1.5811452218758
United Kingdom	1949	200	1.04858325081957	0.261402667795995	1.03705384141023	0.567322375244128	1.59238427491539
United Kingdom	1950	200	1.29698234939357	0.269261432340976	1.28531316653355	0.806352170560929	1.85067418733118
United Kingdom	1951	200	1.14256769554427	0.266172876495359	1.13136107656666	0.65431435933727	1.69322263067646
United Kingdom	1952	200	1.1408983204599	0.271343878430553	1.13017182205989	0.624497493958762	1.70880889174571
United Kingdom	1953	200	1.13922916115225	0.265389316152116	1.13223038950027	0.63676461060347	1.68451533848009
United Kingdom	1954	200	1.14512740288176	0.266404112621839	1.13081485204851	0.64558517774565	1.69956596224904
United Kingdom	1955	200	1.17439111566344	0.258304663808707	1.16865851625836	0.689973572524792	1.69066432262528
United Kingdom	1956	200	1.14762699819953	0.271525561993128	1.13665437059561	0.638728450093517	1.712372994317
United Kingdom	1957	200	1.15105172783633	0.272633865197965	1.14351806472531	0.640637166969509	1.71268665663742
United Kingdom	1958	200	1.14263291278119	0.268482710012705	1.12885750576457	0.647663796258322	1.68750207976105
United Kingdom	1959	200	1.14480955883706	0.268381875948481	1.13397732445183	0.653140429380257	1.69253827058367
United Kingdom	1960	200	1.1753892964142	0.253288800920739	1.16741522983714	0.70799523808855	1.70196956792999
United Kingdom	1961	200	1.40805231183705	0.303879057323505	1.39258337111521	0.847604328997144	2.03660557092975
United Kingdom	1962	200	1.14511683752836	0.267395939225833	1.13705509045708	0.653727260436451	1.6924106043593
United Kingdom	1963	200	1.14085228257058	0.269606717474766	1.12943494705967	0.627665851646178	1.69013866537741
United Kingdom	1964	200	1.40882472076724	0.301651010076156	1.39696283340899	0.861447294620933	2.03992902538918
United Kingdom	1965	200	1.17952242725036	0.255820613069743	1.17106385545068	0.704229213823322	1.70240406038066
United Kingdom	1966	200	1.14122133916707	0.271624228421892	1.13029593027362	0.638738532787104	1.70018721198231
United Kingdom	1967	200	1.140392376247	0.27173680099643	1.1344410866629	0.639336670549904	1.69148672667273
United Kingdom	1968	200	1.13993631308903	0.263310665904135	1.13716379387815	0.650002123324884	1.66652527625878
United Kingdom	1969	200	1.14883767961012	0.272871321564921	1.13790120377945	0.639918107837847	1.7242006107363
United Kingdom	1970	200	1.14868339512177	0.269645748092896	1.14238529624653	0.641023780528098	1.69627658401726
United Kingdom	1971	200	1.14653624355955	0.270576708250627	1.13998668093274	0.642155705196922	1.70832614573172
United Kingdom	1972	200	1.12135201607721	0.223308587072508	1.11573924794093	0.702194816955933	1.56902300977031
United Kingdom	1973	200	1.29708922361344	0.248872988053337	1.28635180579586	0.832651654173003	1.80685657754536
United Kingdom	1974	200	1.20924695645701	0.230888226617528	1.20339649597604	0.775612680998614	1.67379607557178
United Kingdom	1975	200	1.40412941559211	0.254790506229385	1.392765062093	0.931215245147243	1.9439963032674
United Kingdom	1976	200	1.41101966524369	0.253311776425194	1.40138229381521	0.939103434845126	1.9358750903906
United Kingdom	1977	200	1.41853254212638	0.257820828825914	1.40921846676049	0.927121527767808	1.94673296961969
[truncated: 7,851 more rows]
