# Supplementary material
Source: publisher figshare collection journal article supplement (https://sage.figshare.com/ndownloader/files/14729102)
Supplement: Supplementary file 5 [file 14729102 › replication_archive/README.html]

Replication Archive: The Democracy Dilemma


# Replication Archive: “The Democracy Dilemma”

This script replicates all the tables and plots in the article.

# Software Version Requirements

The replication archive is built around a series of R and Stata scripts. It was tested under `R 3.4.1` and Stata `13.1.` If you experience any problems with other versions or the replication script in general get in touch at [redacted].

# Software Packages

## R packages

Note: you can copy and paste the code below to directly install all required packages

```
package_list <- c("countrycode",
                  "lfe",
                  "texreg",
                  "dplyr",
                  "readr",
                  "texreg",
                  "readxl",
                  "MatchIt",
                  "xtable",
                  "AER",
                  "ivpack",
                  "lmtest",
                  "foreign",
                  "tidyverse",
                  "ggrepel",
                  "ebal",
                  "lubridate",
                  "gridExtra")

install.packages(package_list)
```

# Data Files

The replication package consists of the following files in the folder `./data`:

- `diss_df.rda`: The main country-year data set
- `nelda_ps.rda`: The main election-round data set
- `instrumentedAid2.rdata`: The data set which includes the aid instrumental variable

The folder `./data/external_input/` contains data files used to construct alternative variable codings. They are automatically included by the replication script.

# Working Directory

The script assumes that the working directory is the directory in which this `README` file is saved.

# Scripts

The script contains two main replication files:

- `./code/paper_tables_and_plots.R`: This script produces all main tables and figures in the paper.
- `./code/appendix_tables_and_plots.R`: This script produces all tables and plots in the Appendix.

# Run Replication

## Manual Replication

Open RStudio, change your working directory to the same directory of this `README` file, copy & paste the code below in your editor window and execute the script.

```
source("./code/paper_tables_and_plots.R")
source("./code/appendix_tables_and_plots.R")
```

## Automatic Replication

Open the `README.rmd` file in RStudio, set your working directory to the same directory of this `README` file and press the `Knit` button in RStudio.

```
source("./code/paper_tables_and_plots.R")
source("./code/appendix_tables_and_plots.R")
```
