# Supplementary material
Source: publisher figshare collection journal article supplement (https://sage.figshare.com/ndownloader/files/14729102)
Supplement: Supplementary file 5 [file 14729102 › replication_archive/tables/appendix_table_3.html]

Statistical models

|  | **Model 1** | **Model 2** | **Model 3** | **Model 4** | **Model 5** | **Model 6** | **Model 7** | **Model 8** |
| Power-Sharing (binary) | -0.26 | -2.01\*\* | -0.60\*\*\* | -0.16\* | 0.13\*\* | 0.11\* | 0.81\*\*\* | 1.02\*\*\* |
|  | (0.58) | (0.92) | (0.15) | (0.09) | (0.05) | (0.06) | (0.29) | (0.30) |
| Aid / GDP (instrumented) | 0.76\*\* |  | -0.02 |  | 0.00 |  | -0.14 |  |
|  | (0.33) |  | (0.02) |  | (0.01) |  | (0.12) |  |
| Aid / GDP (log) |  | -0.36 |  | -0.00 |  | -0.01 |  | 0.07 |
|  |  | (0.25) |  | (0.04) |  | (0.02) |  | (0.11) |
| Power-Sharing (binary) \* Aid (instrumented) | 0.51\*\* |  | 0.32\*\*\* |  | -0.05\*\* |  | -0.21\* |  |
|  | (0.26) |  | (0.06) |  | (0.02) |  | (0.11) |  |
| Power-Sharing (binary) \* Aid |  | 1.15\*\*\* |  | 0.13\*\*\* |  | -0.05\*\* |  | -0.32\*\*\* |
|  |  | (0.36) |  | (0.04) |  | (0.02) |  | (0.11) |
| Num. obs. | 261 | 108 | 141 | 72 | 270 | 108 | 271 | 108 |
| Adj. R2 (full model) | 0.74 | 0.77 | 0.58 | 0.33 | 0.58 | 0.71 | 0.32 | 0.59 |
| Adj. R2 (proj model) | 0.72 | 0.77 | 0.45 | 0.33 | 0.55 | 0.71 | 0.31 | 0.59 |
| \*\*\*p < 0.01, \*\*p < 0.05, \*p < 0.1 | | | | | | | | | |
