# Supplementary material
Source: publisher figshare collection journal article supplement (https://sage.figshare.com/ndownloader/files/14729102)
Supplement: Supplementary file 5 [file 14729102 › replication_archive/tables/appendix_table_4_after.html]

|  | Mean Treated | Mean Control | P-Value T-Test | P-Value K-S Test |
| --- | --- | --- | --- | --- |
| Aid / GDP (log) | 2.08 | 2.01 | 0.74 | 0.41 |
| GDP / PC (log) | 6.37 | 6.39 | 0.93 | 0.11 |
| Population (log) | 15.51 | 15.81 | 0.34 | 0.01 |
| Conflict Intensity | 0.25 | 0.24 | 0.88 |  |
| Nonstate Conflict | 0.47 | 0.33 | 0.17 |  |
| Natural Resource Rents (log) | 1.62 | 1.73 | 0.68 | 0.38 |
| Regime Type (Polity) | 1.83 | 2.08 | 0.80 | 0.51 |
