# Supplementary material
Source: publisher figshare collection journal article supplement (https://sage.figshare.com/ndownloader/files/14729102)
Supplement: Supplementary file 5 [file 14729102 › replication_archive/tables/appendix_table_4_before.html]

|  | Mean Treated | Mean Control | P-Value T-Test | P-Value K-S Test |
| --- | --- | --- | --- | --- |
| Aid / GDP (log) | 2.08 | 1.43 | 0.00 | 0.00 |
| GDP / PC (log) | 6.37 | 6.54 | 0.29 | 0.14 |
| Population (log) | 15.51 | 15.91 | 0.16 | 0.01 |
| Conflict Intensity | 0.25 | 0.27 | 0.85 |  |
| Nonstate Conflict | 0.47 | 0.12 | 0.00 |  |
| Natural Resource Rents (log) | 1.62 | 1.79 | 0.44 | 0.12 |
| Regime Type (Polity) | 1.83 | 1.74 | 0.92 | 0.22 |
