# Supplementary material
Source: publisher figshare collection journal article supplement (https://sage.figshare.com/ndownloader/files/14729102)
Supplement: Supplementary file 5 [file 14729102 › replication_archive/tables/appendix_table_5.html]

Statistical models

|  | **Model 1** | **Model 2** | **Model 3** | **Model 4** | **Model 5** | **Model 6** | **Model 7** | **Model 8** |
| Power-Sharing (binary) | -0.38 |  | -0.13 |  | 0.15\*\*\* |  | 0.83\*\*\* |  |
|  | (0.62) |  | (0.18) |  | (0.04) |  | (0.28) |  |
| Power-Sharing (No. of seats) |  | -0.07 |  | -0.05\* |  | 0.03\*\*\* |  | 0.09 |
|  |  | (0.12) |  | (0.03) |  | (0.01) |  | (0.06) |
| Aid / GDP (log) | 0.05 | 0.08 | -0.03 | -0.03 | -0.02\* | -0.02\* | -0.02 | -0.01 |
|  | (0.18) | (0.18) | (0.02) | (0.02) | (0.01) | (0.01) | (0.07) | (0.08) |
| Power-Sharing (binary) \* Aid | 0.61\*\* |  | 0.11 |  | -0.05\*\*\* |  | -0.24\*\* |  |
|  | (0.25) |  | (0.07) |  | (0.01) |  | (0.12) |  |
| Power-Sharing (No. of seats) \* Aid |  | 0.07\* |  | 0.02\*\* |  | -0.01\*\*\* |  | -0.03\* |
|  |  | (0.04) |  | (0.01) |  | (0.00) |  | (0.02) |
| GDP p/c (log) | -0.02 | -0.01 | -0.03 | -0.03 | -0.02 | -0.02 | -0.38\*\*\* | -0.37\*\*\* |
|  | (0.30) | (0.30) | (0.03) | (0.04) | (0.02) | (0.02) | (0.12) | (0.13) |
| Population (log) | 0.15 | 0.11 | 0.03 | 0.03 | -0.02 | -0.02\* | 0.03 | 0.03 |
|  | (0.13) | (0.13) | (0.02) | (0.02) | (0.01) | (0.01) | (0.10) | (0.10) |
| Conflict Intensity | 0.01 | -0.08 | -0.16\*\* | -0.14 | 0.03 | 0.02 | 0.18 | 0.16 |
|  | (0.44) | (0.44) | (0.08) | (0.09) | (0.03) | (0.03) | (0.22) | (0.22) |
| Non-State Violence | -0.78 | -0.87 | -0.29\*\*\* | -0.30\*\*\* | 0.03 | 0.03 | -0.91\*\* | -0.90\*\* |
|  | (0.55) | (0.56) | (0.05) | (0.05) | (0.03) | (0.03) | (0.44) | (0.45) |
| Nat. Res. Rents | -0.03\* | -0.03\*\* | -0.01\*\*\* | -0.01\*\*\* | -0.00\*\* | -0.00\*\* | -0.00 | -0.00 |
|  | (0.01) | (0.01) | (0.00) | (0.00) | (0.00) | (0.00) | (0.01) | (0.01) |
| Regime Type | 0.82\*\*\* | 0.82\*\*\* | 0.11\*\*\* | 0.10\*\*\* | 0.10\*\*\* | 0.10\*\*\* | 0.39\*\*\* | 0.38\*\*\* |
|  | (0.07) | (0.07) | (0.02) | (0.02) | (0.01) | (0.01) | (0.10) | (0.10) |
| Ethnic Frac. | 0.15 | 0.46 | 0.27\*\*\* | 0.34\*\*\* | -0.10 | -0.11 | 0.15 | 0.23 |
|  | (0.80) | (0.77) | (0.09) | (0.09) | (0.07) | (0.07) | (0.58) | (0.57) |
| UN PKO | 0.65 | 0.55 | 0.14\*\* | 0.11 | -0.00 | -0.01 | -0.29 | -0.29 |
|  | (0.54) | (0.55) | (0.07) | (0.07) | (0.03) | (0.03) | (0.25) | (0.25) |
| Num. obs. | 263 | 263 | 141 | 141 | 272 | 272 | 273 | 273 |
| Adj. R2 (full model) | 0.77 | 0.76 | 0.66 | 0.65 | 0.60 | 0.60 | 0.34 | 0.33 |
| Adj. R2 (proj model) | 0.75 | 0.75 | 0.56 | 0.54 | 0.57 | 0.57 | 0.33 | 0.31 |
| \*\*\*p < 0.01, \*\*p < 0.05, \*p < 0.1 | | | | | | | | | |
