# Supplementary material
Source: publisher figshare collection journal article supplement (https://sage.figshare.com/ndownloader/files/14729102)
Supplement: Supplementary file 5 [file 14729102 › replication_archive/tables/appendix_table_6.html]

Statistical models

|  | **Model 1** | **Model 2** |
| Aid Cut-Off | 0.05 |  |
|  | (0.10) |  |
| Chinese Aid / GDP (log) |  | 0.39 |
|  |  | (11.11) |
| Power-Sharing (No. of seats) | 0.03\*\* | 0.07 |
|  | (0.01) | (0.11) |
| Power-Sharing (No. of seats) \* Aid Cut-Off | 0.16\*\* |  |
|  | (0.06) |  |
| Power-Sharing (No. of seats) \* Chinese Aid |  | 4.66 |
|  |  | (5.18) |
| Aid / GDP (log) | -0.03 | 0.58 |
|  | (0.02) | (0.37) |
| GDP p/c (log) | -0.03 | -0.66 |
|  | (0.04) | (0.67) |
| Population (log) | 0.02 | 0.72\*\*\* |
|  | (0.02) | (0.25) |
| Conflict Intensity | -0.10 | -1.21 |
|  | (0.10) | (0.76) |
| Non-State Violence | -0.25\*\*\* | -1.50\* |
|  | (0.06) | (0.77) |
| Nat. Res. Rents | -0.01\*\*\* | -0.02 |
|  | (0.00) | (0.02) |
| Regime Type | 0.10\*\*\* | 0.53\*\*\* |
|  | (0.02) | (0.14) |
| Num. obs. | 141 | 115 |
| Adj. R2 (full model) | 0.53 | 0.54 |
| Adj. R2 (proj model) | 0.38 | 0.49 |
| \*\*\*p < 0.01, \*\*p < 0.05, \*p < 0.1 | | | |
