# Supplementary material
Source: publisher figshare collection journal article supplement (https://sage.figshare.com/ndownloader/files/14729102)
Supplement: Supplementary file 5 [file 14729102 › replication_archive/tables/appendix_table_8.html]

Statistical models

|  | **Model 1** | **Model 2** | **Model 3** | **Model 4** | **Model 5** | **Model 6** | **Model 7** | **Model 8** | **Model 9** | **Model 10** | **Model 11** | **Model 12** |
| Power-Sharing (binary) | -0.02 |  | -0.26 |  | -0.19 |  | -1.91 |  | 0.27\*\*\* |  | 0.02 |  |
|  | (0.06) |  | (0.33) |  | (0.51) |  | (1.39) |  | (0.10) |  | (0.07) |  |
| Power-Sharing (No. of seats) |  | -0.01 |  | -0.02 |  | -0.00 |  | -0.02 |  | 0.05\*\*\* |  | 0.01 |
|  |  | (0.01) |  | (0.05) |  | (0.08) |  | (0.16) |  | (0.02) |  | (0.02) |
| Aid / GDP (log) | -0.00 | 0.00 | 0.05 | 0.06 | 0.05 | 0.07 | -0.22 | -0.17 | -0.02\*\* | -0.02\*\* | -0.00 | -0.00 |
|  | (0.02) | (0.02) | (0.13) | (0.13) | (0.18) | (0.18) | (0.15) | (0.16) | (0.01) | (0.01) | (0.01) | (0.01) |
| Power-Sharing (binary) \* Aid | 0.03 |  | 0.35\*\* |  | 0.50\*\* |  | 1.01\* |  | -0.06 |  | -0.01 |  |
|  | (0.03) |  | (0.14) |  | (0.22) |  | (0.57) |  | (0.04) |  | (0.02) |  |
| Power-Sharing (No. of seats) \* Aid |  | 0.01\* |  | 0.04 |  | 0.05\* |  | 0.04 |  | -0.01\*\* |  | -0.00 |
|  |  | (0.00) |  | (0.02) |  | (0.03) |  | (0.05) |  | (0.00) |  | (0.00) |
| GDP p/c (log) | -0.00 | -0.00 | -0.05 | -0.04 | -0.10 | -0.08 | -0.10 | -0.08 | -0.06\* | -0.05 | -0.03 | -0.03 |
|  | (0.03) | (0.02) | (0.25) | (0.25) | (0.33) | (0.34) | (0.27) | (0.29) | (0.03) | (0.03) | (0.02) | (0.02) |
| Population (log) | 0.02 | 0.02 | 0.09 | 0.06 | 0.08 | 0.04 | 0.14 | 0.14 | 0.01 | 0.00 | 0.02 | 0.02 |
|  | (0.01) | (0.01) | (0.10) | (0.10) | (0.12) | (0.12) | (0.20) | (0.19) | (0.02) | (0.02) | (0.01) | (0.01) |
| Conflict Intensity | 0.03 | 0.02 | 0.03 | -0.01 | 0.14 | 0.07 | -0.27 | -0.42 | 0.00 | -0.01 | -0.04 | -0.04 |
|  | (0.03) | (0.03) | (0.40) | (0.40) | (0.53) | (0.53) | (0.68) | (0.75) | (0.05) | (0.05) | (0.04) | (0.04) |
| Non-State Violence | -0.13\*\*\* | -0.13\*\*\* | -0.41 | -0.43 | -0.34 | -0.37 | -2.31\*\* | -2.33\*\* | 0.00 | 0.01 | 0.03 | 0.03 |
|  | (0.04) | (0.04) | (0.47) | (0.48) | (0.57) | (0.59) | (0.92) | (0.89) | (0.05) | (0.05) | (0.03) | (0.03) |
| Nat. Res. Rents | -0.00 | -0.00\* | -0.02 | -0.02 | -0.03 | -0.03 | -0.01 | -0.01 | -0.00 | -0.00 | 0.00 | 0.00 |
|  | (0.00) | (0.00) | (0.01) | (0.01) | (0.02) | (0.02) | (0.01) | (0.01) | (0.00) | (0.00) | (0.00) | (0.00) |
| UDS | 0.87\*\*\* | 0.86\*\*\* |  |  |  |  |  |  |  |  |  |  |
|  | (0.05) | (0.05) |  |  |  |  |  |  |  |  |  |  |
| XPOLITY |  |  | 0.82\*\*\* | 0.81\*\*\* |  |  |  |  |  |  |  |  |
|  |  |  | (0.06) | (0.07) |  |  |  |  |  |  |  |  |
| Polity2 (Interregnum) |  |  |  |  | 0.82\*\*\* | 0.82\*\*\* |  |  |  |  |  |  |
|  |  |  |  |  | (0.07) | (0.07) |  |  |  |  |  |  |
| Regime Type |  |  |  |  |  |  | 0.30\*\* | 0.25\* | 0.14\*\*\* | 0.13\*\*\* | -0.06\*\*\* | -0.06\*\*\* |
|  |  |  |  |  |  |  | (0.14) | (0.14) | (0.01) | (0.01) | (0.01) | (0.01) |
| Num. obs. | 273 | 273 | 254 | 254 | 254 | 254 | 142 | 142 | 273 | 273 | 273 | 273 |
| Adj. R2 (full model) | 0.84 | 0.84 | 0.76 | 0.76 | 0.78 | 0.78 | 0.40 | 0.37 | 0.55 | 0.55 | 0.40 | 0.40 |
| Adj. R2 (proj model) | 0.82 | 0.82 | 0.75 | 0.75 | 0.77 | 0.77 | 0.05 | 0.02 | 0.52 | 0.52 | 0.38 | 0.38 |
| \*\*\*p < 0.01, \*\*p < 0.05, \*p < 0.1 | | | | | | | | | | | | | |
