# Supplementary material
Source: publisher figshare collection journal article supplement (https://sage.figshare.com/ndownloader/files/14729102)
Supplement: Supplementary file 5 [file 14729102 › replication_archive/tables/appendix_table_9.html]

Statistical models

|  | **Model 1** | **Model 2** |
| Power-Sharing (binary) | -0.43 | 0.41 |
|  | (0.53) | (0.43) |
| Power-Sharing (binary) \* Aid | 0.66\*\*\* |  |
|  | (0.22) |  |
| Power-Sharing (binary) \* Aid / GDP (not log-transformed) |  | 0.04\*\* |
|  |  | (0.02) |
| Aid / GDP (log) | 0.06 |  |
|  | (0.17) |  |
| Aid / GDP (not log-transformed) |  | 0.02\* |
|  |  | (0.01) |
| GDP p/c (log) | -0.04 | -0.01 |
|  | (0.32) | (0.29) |
| Population (log) | 0.14 | 0.14 |
|  | (0.14) | (0.13) |
| Conflict Intensity | 0.13 | 0.01 |
|  | (0.46) | (0.42) |
| Non-State Violence | -0.76 | -0.69 |
|  | (0.55) | (0.54) |
| Nat. Res. Rents | -0.03 | -0.03\*\* |
|  | (0.02) | (0.02) |
| Regime Type | 0.82\*\*\* | 0.82\*\*\* |
|  | (0.07) | (0.07) |
| Num. obs. | 263 | 263 |
| Adj. R2 (full model) | 0.77 | 0.77 |
| Adj. R2 (proj model) | 0.75 | 0.75 |
| \*\*\*p < 0.01, \*\*p < 0.05, \*p < 0.1 | | | |
