# Supplementary material
Source: publisher figshare collection journal article supplement (https://sage.figshare.com/ndownloader/files/14729102)
Supplement: Supplementary file 5 [file 14729102 › replication_archive/tables/appendix_table_10.html]

Statistical models

|  | **Model 1** | **Model 2** | **Model 3** | **Model 4** |
| Power-Sharing (binary) | -0.84 | -0.24\*\* | 0.12\*\*\* | 0.87\*\*\* |
|  | (0.61) | (0.12) | (0.04) | (0.29) |
| Aid / GDP (log) | 0.03 | -0.02 | -0.02\*\* | -0.03 |
|  | (0.17) | (0.02) | (0.01) | (0.07) |
| Power-Sharing (binary) \* Aid | 0.75\*\*\* | 0.18\*\*\* | -0.05\*\*\* | -0.26\*\* |
|  | (0.24) | (0.04) | (0.01) | (0.13) |
| GDP p/c (log) | -0.02 | 0.01 | -0.01 | -0.39\*\*\* |
|  | (0.32) | (0.02) | (0.02) | (0.11) |
| Population (log) | 0.05 | 0.03\* | -0.02\* | 0.05 |
|  | (0.11) | (0.02) | (0.01) | (0.09) |
| Conflict Intensity | 0.23 | 0.02 | 0.02 | 0.12 |
|  | (0.46) | (0.06) | (0.04) | (0.21) |
| Non-State Violence | -0.42 | -0.24\*\*\* | 0.01 | -0.91\*\* |
|  | (0.51) | (0.06) | (0.04) | (0.42) |
| Nat. Res. Rents | -0.03\* | -0.01\*\*\* | -0.00\*\* | -0.00 |
|  | (0.02) | (0.00) | (0.00) | (0.01) |
| Regime Type | 0.82\*\*\* | 0.09\*\*\* | 0.10\*\*\* | 0.40\*\*\* |
|  | (0.07) | (0.02) | (0.01) | (0.08) |
| Num. obs. | 263 | 141 | 272 | 273 |
| Adj. R2 (full model) | 0.76 | 0.53 | 0.58 | 0.37 |
| Adj. R2 (proj model) | 0.76 | 0.52 | 0.57 | 0.37 |
| \*\*\*p < 0.01, \*\*p < 0.05, \*p < 0.1 | | | | | |
