# Supplementary material
Source: publisher figshare collection journal article supplement (https://sage.figshare.com/ndownloader/files/14729102)
Supplement: Supplementary file 5 [file 14729102 › replication_archive/tables/appendix_table_11.html]

Statistical models

|  | **Model 1** | **Model 2** | **Model 3** | **Model 4** |
| Power-Sharing (binary) | -0.55 | -0.23\*\* | 0.14\*\*\* | 0.87\*\*\* |
|  | (0.62) | (0.11) | (0.04) | (0.31) |
| Aid / GDP (log) | 0.07 | -0.04\* | -0.02\* | -0.03 |
|  | (0.17) | (0.02) | (0.01) | (0.07) |
| Power-Sharing (binary) \* Aid | 0.62\*\* | 0.16\*\*\* | -0.06\*\*\* | -0.27\*\* |
|  | (0.25) | (0.04) | (0.01) | (0.13) |
| GDP p/c (log) | 0.13 | -0.00 | -0.01 | -0.38\*\*\* |
|  | (0.34) | (0.03) | (0.03) | (0.13) |
| Population (log) | 0.15 | 0.03 | -0.02\* | 0.04 |
|  | (0.13) | (0.02) | (0.01) | (0.10) |
| Conflict Intensity | -0.15 | -0.13 | 0.02 | 0.09 |
|  | (0.44) | (0.08) | (0.04) | (0.26) |
| Non-State Violence | -0.75 | -0.23\*\*\* | 0.02 | -0.91\*\* |
|  | (0.52) | (0.06) | (0.04) | (0.42) |
| Nat. Res. Rents | -0.04\*\* | -0.01\*\*\* | -0.00\*\*\* | -0.00 |
|  | (0.01) | (0.00) | (0.00) | (0.01) |
| Regime Type | 0.81\*\*\* | 0.10\*\*\* | 0.10\*\*\* | 0.41\*\*\* |
|  | (0.07) | (0.02) | (0.01) | (0.09) |
| Election Promise in PA | 0.50\*\* | 0.09\*\*\* | 0.01 | 0.05 |
|  | (0.20) | (0.02) | (0.02) | (0.16) |
| Num. obs. | 263 | 141 | 272 | 273 |
| Adj. R2 (full model) | 0.77 | 0.65 | 0.59 | 0.33 |
| Adj. R2 (proj model) | 0.76 | 0.54 | 0.56 | 0.32 |
| \*\*\*p < 0.01, \*\*p < 0.05, \*p < 0.1 | | | | | |
