# Supplementary material
Source: publisher figshare collection journal article supplement (https://sage.figshare.com/ndownloader/files/14729102)
Supplement: Supplementary file 5 [file 14729102 › replication_archive/tables/table_1.html]

Statistical models

|  | **Model 1** | **Model 2** | **Model 3** | **Model 4** | **Model 5** | **Model 6** | **Model 7** | **Model 8** |
| Constituent Terms |  |  |  |  |  |  |  |  |
|  |  |  |  |  |  |  |  |  |
| Power-Sharing (binary) | -0.43 |  | -0.33\*\* |  | 0.14\*\*\* |  | 0.89\*\*\* |  |
|  | (0.53) |  | (0.15) |  | (0.04) |  | (0.31) |  |
| Power-Sharing (No. of seats) |  | -0.06 |  | -0.06\*\* |  | 0.03\*\*\* |  | 0.10 |
|  |  | (0.10) |  | (0.02) |  | (0.01) |  | (0.07) |
| Aid / GDP (log) | 0.06 | 0.09 | -0.04 | -0.03 | -0.02\* | -0.02\* | -0.03 | -0.02 |
|  | (0.17) | (0.17) | (0.02) | (0.02) | (0.01) | (0.01) | (0.07) | (0.08) |
| Interaction Term |  |  |  |  |  |  |  |  |
|  |  |  |  |  |  |  |  |  |
| Power-Sharing (binary) \* Aid | 0.66\*\*\* |  | 0.21\*\*\* |  | -0.05\*\*\* |  | -0.26\*\* |  |
|  | (0.22) |  | (0.06) |  | (0.02) |  | (0.13) |  |
| Power-Sharing (No. of seats) \* Aid |  | 0.08\*\* |  | 0.03\*\*\* |  | -0.01\*\*\* |  | -0.04\* |
|  |  | (0.03) |  | (0.01) |  | (0.00) |  | (0.02) |
| Controls |  |  |  |  |  |  |  |  |
|  |  |  |  |  |  |  |  |  |
| GDP p/c (log) | -0.04 | -0.02 | -0.02 | -0.02 | -0.02 | -0.02 | -0.40\*\*\* | -0.39\*\*\* |
|  | (0.32) | (0.31) | (0.03) | (0.04) | (0.03) | (0.02) | (0.12) | (0.13) |
| Population (log) | 0.14 | 0.09 | 0.03 | 0.02 | -0.02\* | -0.02\* | 0.04 | 0.04 |
|  | (0.14) | (0.13) | (0.02) | (0.02) | (0.01) | (0.01) | (0.10) | (0.10) |
| Conflict Intensity | 0.13 | 0.05 | -0.05 | -0.05 | 0.02 | 0.02 | 0.12 | 0.11 |
|  | (0.46) | (0.46) | (0.08) | (0.11) | (0.04) | (0.04) | (0.22) | (0.23) |
| Non-State Violence | -0.76 | -0.80 | -0.26\*\*\* | -0.26\*\*\* | 0.02 | 0.02 | -0.91\*\* | -0.89\*\* |
|  | (0.55) | (0.55) | (0.06) | (0.06) | (0.04) | (0.04) | (0.43) | (0.44) |
| Nat. Res. Rents | -0.03 | -0.03\* | -0.01\*\*\* | -0.01\*\*\* | -0.00\*\* | -0.00\*\*\* | -0.00 | -0.00 |
|  | (0.02) | (0.02) | (0.00) | (0.00) | (0.00) | (0.00) | (0.01) | (0.01) |
| Regime Type | 0.82\*\*\* | 0.82\*\*\* | 0.11\*\*\* | 0.09\*\*\* | 0.10\*\*\* | 0.10\*\*\* | 0.41\*\*\* | 0.40\*\*\* |
|  | (0.07) | (0.07) | (0.02) | (0.02) | (0.01) | (0.01) | (0.09) | (0.09) |
| Num. obs. | 263 | 263 | 141 | 141 | 272 | 272 | 273 | 273 |
| Adj. R2 (full model) | 0.77 | 0.76 | 0.60 | 0.56 | 0.59 | 0.59 | 0.33 | 0.32 |
| Adj. R2 (proj model) | 0.75 | 0.75 | 0.48 | 0.42 | 0.56 | 0.56 | 0.32 | 0.30 |
| \*\*\*p < 0.01, \*\*p < 0.05, \*p < 0.1 | | | | | | | | | |
