# Supplementary material
Source: publisher figshare collection journal article supplement (https://sage.figshare.com/ndownloader/files/14729102)
Supplement: Supplementary file 5 [file 14729102 › replication_archive/tables/table_1.tex]

\begin{tabular}{l c c c c c c c c }
\hline
 & Model 1 & Model 2 & Model 3 & Model 4 & Model 5 & Model 6 & Model 7 & Model 8 \\
\hline
Constituent Terms                        &              &              &               &               &               &               &               &               \\
                                         &              &              &               &               &               &               &               &               \\
\quad Power-Sharing (binary)             & $-0.43$      &              & $-0.33^{**}$  &               & $0.14^{***}$  &               & $0.89^{***}$  &               \\
                                         & $(0.53)$     &              & $(0.15)$      &               & $(0.04)$      &               & $(0.31)$      &               \\
\quad Power-Sharing (No. of seats)       &              & $-0.06$      &               & $-0.06^{**}$  &               & $0.03^{***}$  &               & $0.10$        \\
                                         &              & $(0.10)$     &               & $(0.02)$      &               & $(0.01)$      &               & $(0.07)$      \\
\quad Aid / GDP (log)                    & $0.06$       & $0.09$       & $-0.04$       & $-0.03$       & $-0.02^{*}$   & $-0.02^{*}$   & $-0.03$       & $-0.02$       \\
                                         & $(0.17)$     & $(0.17)$     & $(0.02)$      & $(0.02)$      & $(0.01)$      & $(0.01)$      & $(0.07)$      & $(0.08)$      \\
Interaction Term                         &              &              &               &               &               &               &               &               \\
                                         &              &              &               &               &               &               &               &               \\
\quad Power-Sharing (binary) * Aid       & $0.66^{***}$ &              & $0.21^{***}$  &               & $-0.05^{***}$ &               & $-0.26^{**}$  &               \\
                                         & $(0.22)$     &              & $(0.06)$      &               & $(0.02)$      &               & $(0.13)$      &               \\
\quad Power-Sharing (No. of seats) * Aid &              & $0.08^{**}$  &               & $0.03^{***}$  &               & $-0.01^{***}$ &               & $-0.04^{*}$   \\
                                         &              & $(0.03)$     &               & $(0.01)$      &               & $(0.00)$      &               & $(0.02)$      \\
Controls                                 &              &              &               &               &               &               &               &               \\
                                         &              &              &               &               &               &               &               &               \\
\quad GDP p/c (log)                      & $-0.04$      & $-0.02$      & $-0.02$       & $-0.02$       & $-0.02$       & $-0.02$       & $-0.40^{***}$ & $-0.39^{***}$ \\
                                         & $(0.32)$     & $(0.31)$     & $(0.03)$      & $(0.04)$      & $(0.03)$      & $(0.02)$      & $(0.12)$      & $(0.13)$      \\
\quad Population (log)                   & $0.14$       & $0.09$       & $0.03$        & $0.02$        & $-0.02^{*}$   & $-0.02^{*}$   & $0.04$        & $0.04$        \\
                                         & $(0.14)$     & $(0.13)$     & $(0.02)$      & $(0.02)$      & $(0.01)$      & $(0.01)$      & $(0.10)$      & $(0.10)$      \\
\quad Conflict Intensity                 & $0.13$       & $0.05$       & $-0.05$       & $-0.05$       & $0.02$        & $0.02$        & $0.12$        & $0.11$        \\
                                         & $(0.46)$     & $(0.46)$     & $(0.08)$      & $(0.11)$      & $(0.04)$      & $(0.04)$      & $(0.22)$      & $(0.23)$      \\
\quad Non-State Violence                 & $-0.76$      & $-0.80$      & $-0.26^{***}$ & $-0.26^{***}$ & $0.02$        & $0.02$        & $-0.91^{**}$  & $-0.89^{**}$  \\
                                         & $(0.55)$     & $(0.55)$     & $(0.06)$      & $(0.06)$      & $(0.04)$      & $(0.04)$      & $(0.43)$      & $(0.44)$      \\
\quad Nat. Res. Rents                    & $-0.03$      & $-0.03^{*}$  & $-0.01^{***}$ & $-0.01^{***}$ & $-0.00^{**}$  & $-0.00^{***}$ & $-0.00$       & $-0.00$       \\
                                         & $(0.02)$     & $(0.02)$     & $(0.00)$      & $(0.00)$      & $(0.00)$      & $(0.00)$      & $(0.01)$      & $(0.01)$      \\
\quad Regime Type                        & $0.82^{***}$ & $0.82^{***}$ & $0.11^{***}$  & $0.09^{***}$  & $0.10^{***}$  & $0.10^{***}$  & $0.41^{***}$  & $0.40^{***}$  \\
                                         & $(0.07)$     & $(0.07)$     & $(0.02)$      & $(0.02)$      & $(0.01)$      & $(0.01)$      & $(0.09)$      & $(0.09)$      \\
\hline
Num. obs.                                & 263          & 263          & 141           & 141           & 272           & 272           & 273           & 273           \\
Adj. R$^2$ (full model)                  & 0.77         & 0.76         & 0.60          & 0.56          & 0.59          & 0.59          & 0.33          & 0.32          \\
Adj. R$^2$ (proj model)                  & 0.75         & 0.75         & 0.48          & 0.42          & 0.56          & 0.56          & 0.32          & 0.30          \\
\hline
\multicolumn{9}{l}{\scriptsize{$^{***}p<0.01$, $^{**}p<0.05$, $^*p<0.1$}}
\end{tabular}
