# Supplementary material
Source: publisher figshare collection journal article supplement (https://sage.figshare.com/ndownloader/files/14729102)

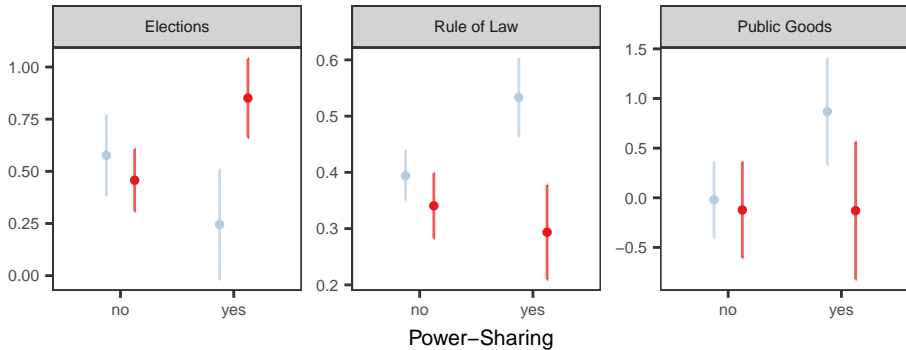

Aid in per cent of GDP: —●— 1 —●— 30

Supplement: Supplementary file 1 [file 14729102]

Absolute Standardized Difference in Means

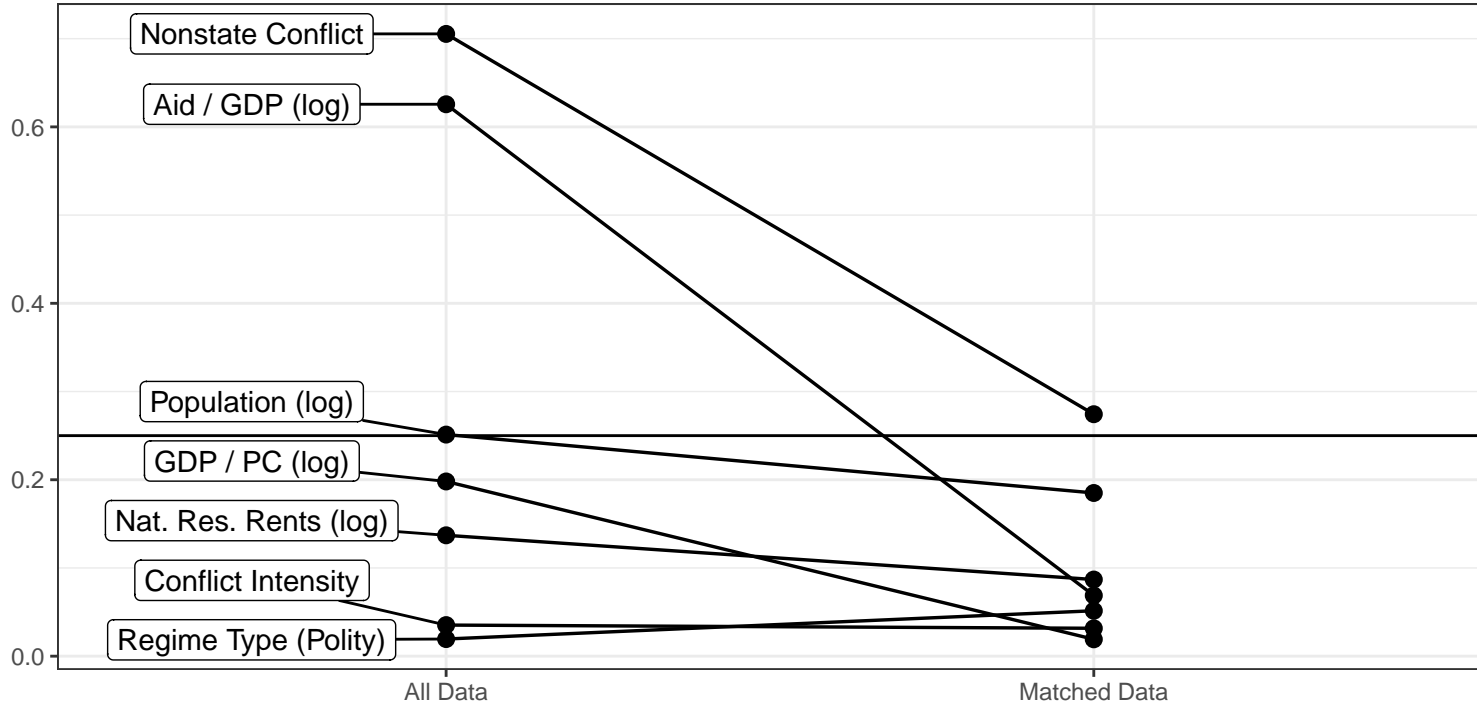

Supplement: Supplementary file 2 [file 14729102]

Estimate of the Interaction Term

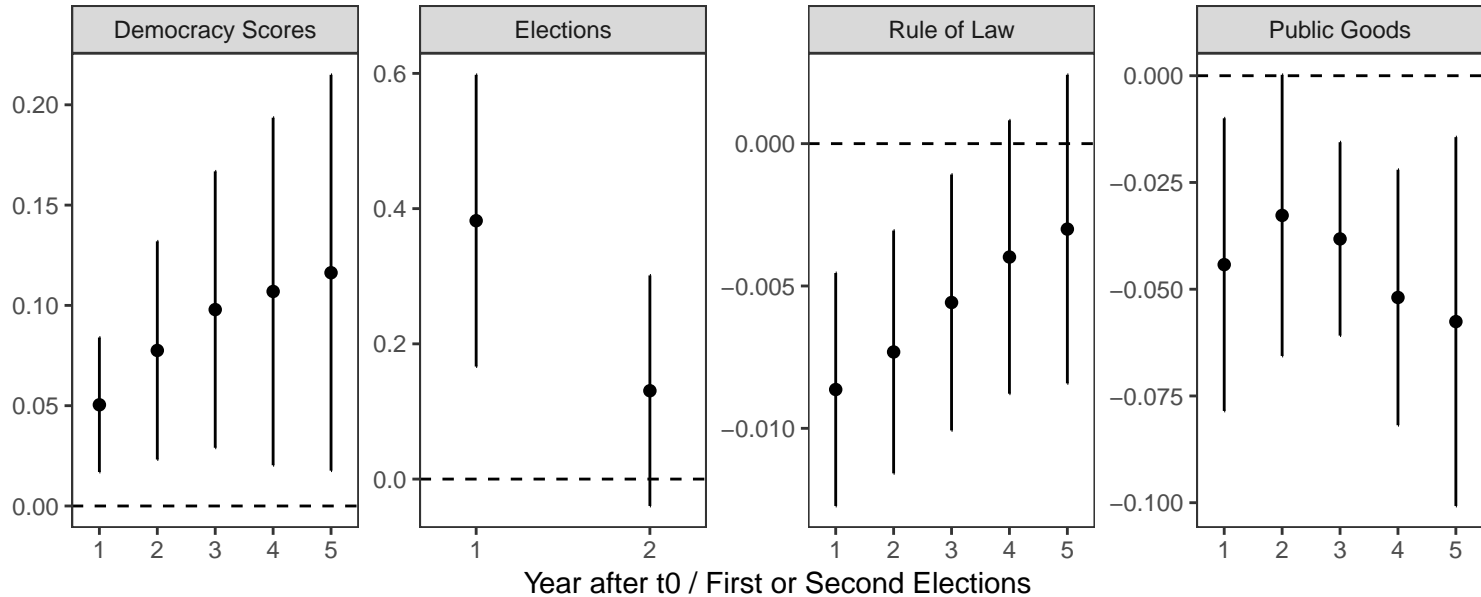

Supplement: Supplementary file 4 [file 14729102]

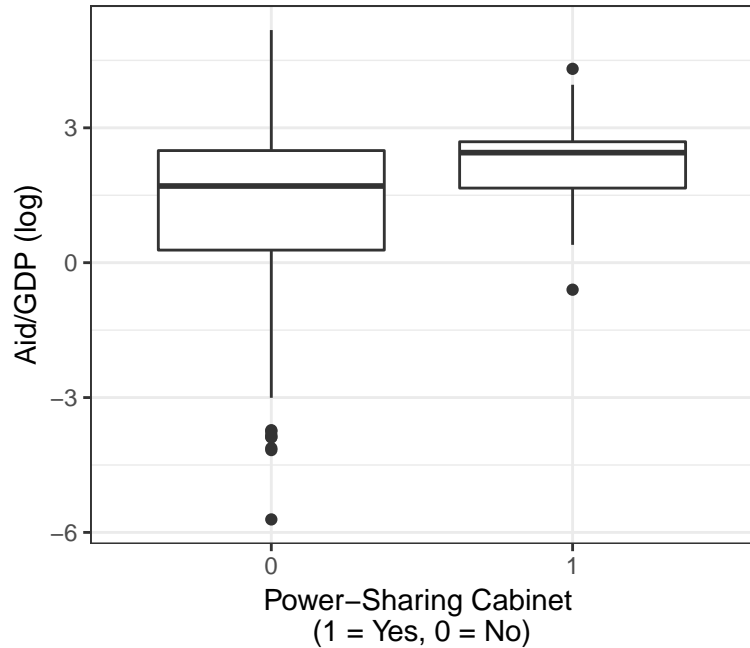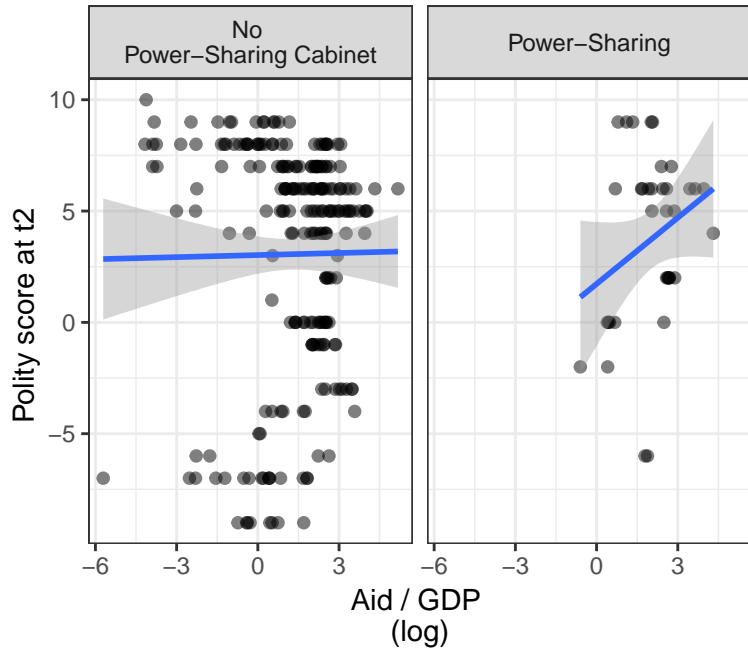

Supplement: Supplementary file 5 [file 14729102 › replication_archive/plots/appendix_figure_1.pdf]

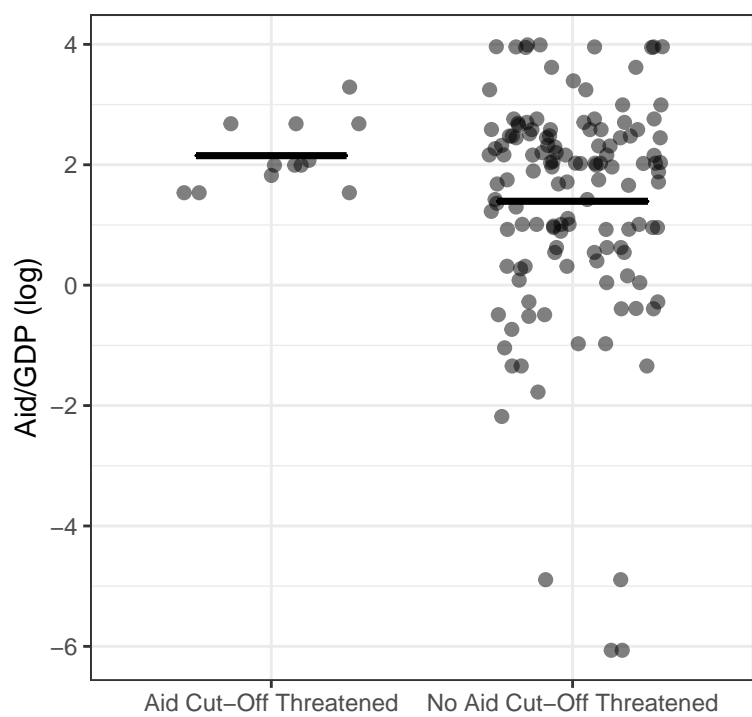

Supplement: Supplementary file 5 [file 14729102 › replication_archive/plots/appendix_figure_2.pdf]

Coefficient Estimate  
of the Interaction Term

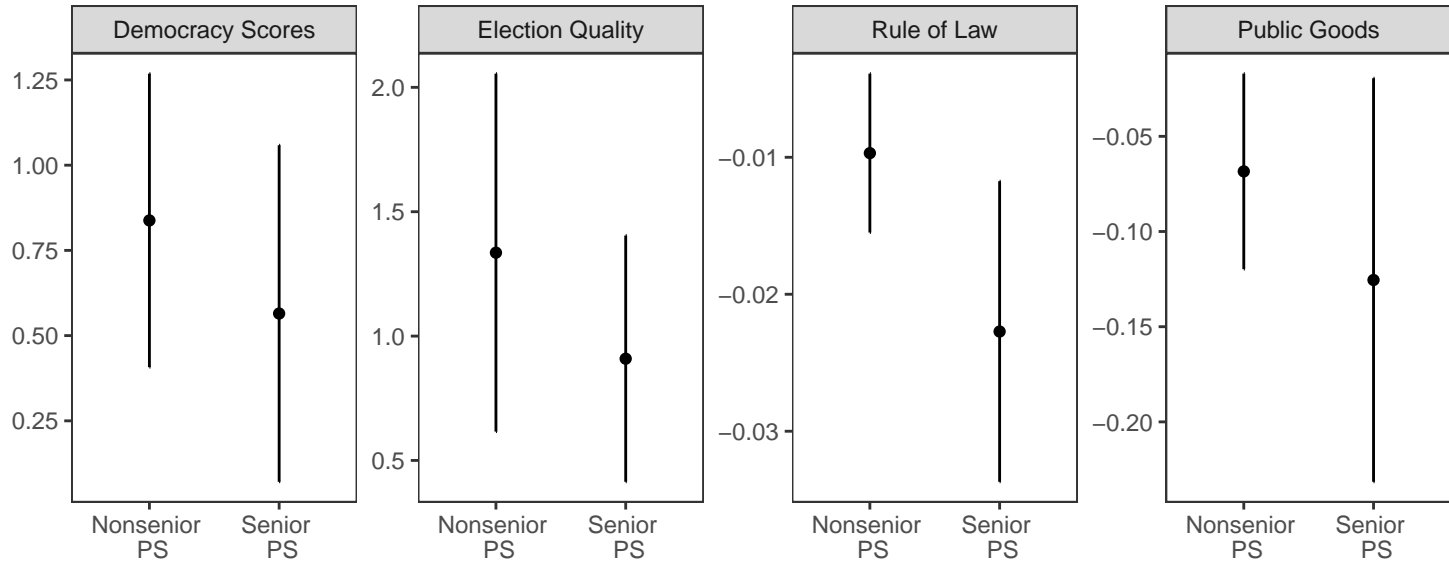

Supplement: Supplementary file 5 [file 14729102 › replication_archive/plots/appendix_figure_5.pdf]

Predicted Polity Scores

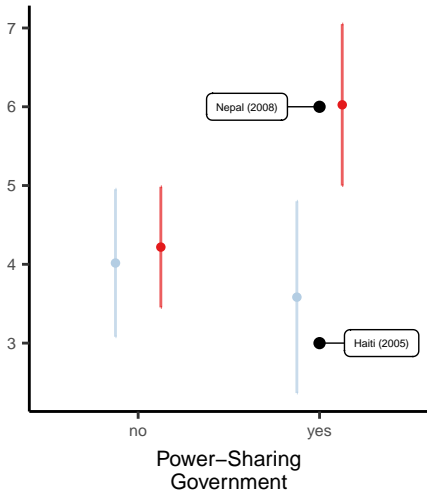

Aid in per cent of GDP: —●— 1 —●— 30

Predicted Polity Scores

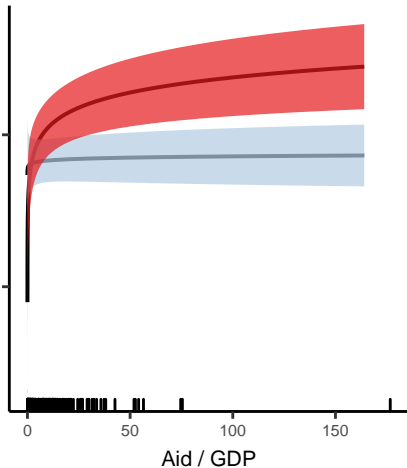

Power-Sharing: ■ no ■ yes

Supplement: Supplementary file 5 [file 14729102 › replication_archive/plots/figure_1.pdf]
